# Supplementary material for: Evaluation and optimization of reduction and alkylation methods to maximize peptide identification with MS-based proteomics
Source: Royal Society of Chemistry journal article supplement (doi:10.1039/c7mb00393e), 2017-09-20
Supplement: c7mb00393e2.xlsx [file c7mb00393e2.xlsx]

## Sheet: Expt. 1
Table S1(A). Peptides containing cysteine identified from the first experiment without the enrichment and reduction/alkylation
Reference	Peptide	Gene symbol	XCorr	Obs m/z	PPM	Annotation
YAL023C	K.NQALGGSLLHSHIQTYPDGSNQQQVTCYGYK.D	PMT2	4.117	852.657	-0.51	Protein O-mannosyltransferase, transfers mannose residues from dolichyl phosphate-D-mannose to protein serine/threonine residues; acts in a complex with Pmt1p, can instead interact with Pmt5p in some conditions; target for new antifungals
YAL038W	K.YRPNCPIILVTR.C	CDC19	3.054	482.275	0.54	Pyruvate kinase, functions as a homotetramer in glycolysis to convert phosphoenolpyruvate to pyruvate, the input for aerobic (TCA cycle) or anaerobic (glucose fermentation) respiration
YAR007C	K.VLEQPDGTWR.C	RFA1	2.243	600.804	0.12	Subunit of heterotrimeric Replication Protein A (RPA), which is a highly conserved single-stranded DNA binding protein involved in DNA replication, repair, and recombination
YAR010C	K.EVHTNQDPLDVSASKTEECEK.A	YAR010C	4.92	787.029	-0.33	Retrotransposon TYA Gag gene co-transcribed with TYB Pol; in YARCTY1-1 TYB is mutant and probably non-functional
YAR010C	K.VACQLIMR.G	YAR010C	2.953	467.254	0.71	Retrotransposon TYA Gag gene co-transcribed with TYB Pol; in YARCTY1-1 TYB is mutant and probably non-functional
YBL030C	K.YAGILDCFKR.T	PET9	1.519	395.874	-0.08	Major ADP/ATP carrier of the mitochondrial inner membrane, exchanges cytosolic ADP for mitochondrially synthesized ATP; phosphorylated; required for viability in many common lab strains carrying a mutation in the polymorphic SAL1 gene
YBL030C	K.YDGAFDCLRK.I	PET9	2.163	396.522	0.01	Major ADP/ATP carrier of the mitochondrial inner membrane, exchanges cytosolic ADP for mitochondrially synthesized ATP; phosphorylated; required for viability in many common lab strains carrying a mutation in the polymorphic SAL1 gene
YBL050W	K.AGNEDEAGNTYVEAYK.C	SEC17	4.836	865.878	-0.39	Peripheral membrane protein required for vesicular transport between ER and Golgi and for the 'priming' step in homotypic vacuole fusion, part of the cis-SNARE complex; has similarity to alpha-SNAP
YBL050W	K.KAGNEDEAGNTYVEAYK.C	SEC17	6.045	929.926	-0.22	Peripheral membrane protein required for vesicular transport between ER and Golgi and for the 'priming' step in homotypic vacuole fusion, part of the cis-SNARE complex; has similarity to alpha-SNAP
YBL076C	K.LGITGKDDVFKYGLENYNNECR.S	ILS1	4.475	850.076	0.14	Cytoplasmic isoleucine-tRNA synthetase, target of the G1-specific inhibitor reveromycin A
YBL076C	K.YGLENYNNECR.S	ILS1	3.951	687.791	-0.04	Cytoplasmic isoleucine-tRNA synthetase, target of the G1-specific inhibitor reveromycin A
YBL076C	R.VISDDYVTSDSGTGIVHNAPAFGEEDNAACLK.N	ILS1	4.33	1099.17	-0.74	Cytoplasmic isoleucine-tRNA synthetase, target of the G1-specific inhibitor reveromycin A
YBL087C	R.ISLGLPVGAIMNCADNSGAR.N	RPL23A	2.951	987.991	0.24	Protein component of the large (60S) ribosomal subunit, identical to Rpl23Bp and has similarity to E. coli L14 and rat L23 ribosomal proteins
YBR025C	K.STFFQAITR.C	OLA1	2.877	535.785	0.62	P-loop ATPase with similarity to human OLA1 and bacterial YchF; identified as specifically interacting with the proteasome; protein levels are induced by hydrogen peroxide
YBR031W	R.SGQGAFGNMCR.G	RPL4A	3.172	572.237	-0.37	N-terminally acetylated protein component of the large (60S) ribosomal subunit, nearly identical to Rpl4Bp and has similarity to E. coli L4 and rat L4 ribosomal proteins
YBR048W	K.TAIEGSYIDKK.C	RPS11B	2.283	408.887	0.05	Protein component of the small (40S) ribosomal subunit; identical to Rps11Ap and has similarity to E. coli S17 and rat S11 ribosomal proteins
YBR078W	K.KLQSNGAIQGDSFVCK.N	ECM33	5.185	847.93	-0.73	GPI-anchored protein of unknown function, has a possible role in apical bud growth; GPI-anchoring on the plasma membrane crucial to function; phosphorylated in mitochondria; similar to Sps2p and Pst1p
YBR118W	K.FVPSKPMCVEAFSEYPPLGR.F	TEF2	2.675	757.371	-0.22	Translational elongation factor EF-1 alpha; also encoded by TEF1; functions in the binding reaction of aminoacyl-tRNA (AA-tRNA) to ribosomes
YBR118W	R.RGNVCGDAKNDPPK.G	TEF2	2.089	490.909	0.24	Translational elongation factor EF-1 alpha; also encoded by TEF1; functions in the binding reaction of aminoacyl-tRNA (AA-tRNA) to ribosomes
YBR139W	K.GGYHPVLSSEECEK.M	YBR139W	3.067	767.845	-0.98	Putative serine type carboxypeptidase with a role in phytochelatin synthesis; green fluorescent protein (GFP)-fusion protein localizes to the vacuole; expression induced by nitrogen limitation in a GLN3, GAT1-independent manner
YBR218C	R.LDGGNAYAGATISPHYDSMLVK.C	PYC2	3.194	766.035	0.13	Pyruvate carboxylase isoform, cytoplasmic enzyme that converts pyruvate to oxaloacetate; highly similar to isoform Pyc1p but differentially regulated; mutations in the human homolog are associated with lactic acidosis
YBR263W	R.YYGGNEIIDKSESLCQAR.A	SHM1	2.147	682.658	-0.69	Mitochondrial serine hydroxymethyltransferase, converts serine to glycine plus 5,10 methylenetetrahydrofolate; involved in generating precursors for purine, pyrimidine, amino acid, and lipid biosynthesis; reverse reaction generates serine
YBR286W	K.LVEIPNLGCEEK.D	APE3	3.16	672.347	-0.49	Vacuolar aminopeptidase Y, processed to mature form by Prb1p
YCL030C	K.FHAAQLPTETLEVETQPGVLCSR.F	HIS4	3.841	842.76	0.48	Multifunctional enzyme containing phosphoribosyl-ATP pyrophosphatase, phosphoribosyl-AMP cyclohydrolase, and histidinol dehydrogenase activities; catalyzes the second, third, ninth and tenth steps in histidine biosynthesis
YCL030C	K.LLQISTDCDSDALK.F	HIS4	3.811	761.376	-1.63	Multifunctional enzyme containing phosphoribosyl-ATP pyrophosphatase, phosphoribosyl-AMP cyclohydrolase, and histidinol dehydrogenase activities; catalyzes the second, third, ninth and tenth steps in histidine biosynthesis
YCL030C	K.LVDNAGSVFVGAYTPESCGDYSSGTNHTLPTYGYAR.Q	HIS4	3.14	1257.24	0.28	Multifunctional enzyme containing phosphoribosyl-ATP pyrophosphatase, phosphoribosyl-AMP cyclohydrolase, and histidinol dehydrogenase activities; catalyzes the second, third, ninth and tenth steps in histidine biosynthesis
YCL059C	K.ALELLTK.C	KRR1	1.626	394.25	-0.18	Essential nucleolar protein required for the synthesis of 18S rRNA and for the assembly of 40S ribosomal subunit
YCR012W	K.DVTFLNDCVGPEVEAAVK.A	PGK1	5.745	953.466	-1.29	3-phosphoglycerate kinase, catalyzes transfer of high-energy phosphoryl groups from the acyl phosphate of 1,3-bisphosphoglycerate to ADP to produce ATP; key enzyme in glycolysis and gluconeogenesis
YCR031C	K.ADRDESSPYAAMLAAQDVAAK.C	RPS14A	3.756	732.68	0.27	Ribosomal protein 59 of the small subunit, required for ribosome assembly and 20S pre-rRNA processing; mutations confer cryptopleurine resistance; nearly identical to Rps14Bp and similar to E. coli S11 and rat S14 ribosomal proteins
YCR031C	K.VKADRDESSPYAAMLAAQDVAAK.C	RPS14A	3.459	1212.09	-1.82	Ribosomal protein 59 of the small subunit, required for ribosome assembly and 20S pre-rRNA processing; mutations confer cryptopleurine resistance; nearly identical to Rps14Bp and similar to E. coli S11 and rat S14 ribosomal proteins
YDL055C	R.SVVLCNSTIK.N	PSA1	2.565	532.295	0.3	GDP-mannose pyrophosphorylase (mannose-1-phosphate guanyltransferase), synthesizes GDP-mannose from GTP and mannose-1-phosphate in cell wall biosynthesis; required for normal cell wall structure
YDL066W	K.DLALACGNNER.S	IDP1	3.126	588.278	0.59	Mitochondrial NADP-specific isocitrate dehydrogenase, catalyzes the oxidation of isocitrate to alpha-ketoglutarate; not required for mitochondrial respiration and may function to divert alpha-ketoglutarate to biosynthetic processes
YDL088C	R.IFHNHDTGCDENDSTVNK.S	ASM4	4.295	682.626	0.12	Nuclear pore complex subunit, part of a subcomplex also containing Nup53p, Nup170p, and Pse1p
YDL126C	R.LGDLVTIHPCPDIK.Y	CDC48	3.344	507.61	0.35	ATPase in ER, nuclear membrane and cytosol with homology to mammalian p97; in a complex with Npl4p and Ufd1p participates in retrotranslocation of ubiquitinated proteins from the ER into the cytosol for degradation by the proteasome
YDL131W	R.VGIADTVGCANPR.Q	LYS21	4.052	636.822	-0.08	Homocitrate synthase isozyme, catalyzes the condensation of acetyl-CoA and alpha-ketoglutarate to form homocitrate, which is the first step in the lysine biosynthesis pathway; highly similar to the other isozyme, Lys20p
YDL185W	K.LNLCAEYK.D	TFP1	2.743	477.242	0.08	Vacuolar ATPase V1 domain subunit A containing the catalytic nucleotide binding sites; protein precursor undergoes self-catalyzed splicing to yield the extein Tfp1p and the intein Vde (PI-SceI), which is a site-specific endonuclease
YDL229W	R.TFTTCADNQTTVQFPVYQGER.V	SSB1	5.135	802.706	0.37	Cytoplasmic ATPase that is a ribosome-associated molecular chaperone, functions with J-protein partner Zuo1p; may be involved in folding of newly-made polypeptide chains; member of the HSP70 family; interacts with phosphatase subunit Reg1p
YDR035W	K.RIMIDCSHGNSNK.D	ARO3	2.776	492.234	-0.73	3-deoxy-D-arabino-heptulosonate-7-phosphate (DAHP) synthase, catalyzes the first step in aromatic amino acid biosynthesis and is feedback-inhibited by phenylalanine or high concentration of tyrosine or tryptophan
YDR037W	K.EICNAYTELNDPFDQR.A	KRS1	4.638	964.427	-0.74	Lysyl-tRNA synthetase; also identified as a negative regulator of general control of amino acid biosynthesis
YDR037W	K.ILVDNKLECPPPLTNAR.M	KRS1	2.861	631.68	-0.11	Lysyl-tRNA synthetase; also identified as a negative regulator of general control of amino acid biosynthesis
YDR062W	R.VPLCEPEELPDDIQKENEYGTLDSPGHLYQVK.S	LCB2	3.422	914.692	0.04	Component of serine palmitoyltransferase, responsible along with Lcb1p for the first committed step in sphingolipid synthesis, which is the condensation of serine with palmitoyl-CoA to form 3-ketosphinganine
YDR120C	K.YSVAQGPPVDTK.C	TRM1	3.806	631.324	-0.53	tRNA methyltransferase, localizes to both the nucleus and mitochondrion to produce the modified base N2,N2-dimethylguanosine in tRNAs in both compartments
YDR233C	K.TQEFSQMACEK.T	RTN1	3.731	651.279	-0.08	ER membrane protein that interacts with exocyst subunit Sec6p and with Yip3p; also interacts with Sbh1p; null mutant has an altered (mostly cisternal) ER morphology; member of the RTNLA (reticulon-like A) subfamily
YDR353W	R.QAITSAGSGCMAALDAEK.Y	TRR1	4.947	870.399	-2.24	Cytoplasmic thioredoxin reductase, key regulatory enzyme that determines the redox state of the thioredoxin system, which acts as a disulfide reductase system and protects cells against both oxidative and reductive stress
YDR380W	K.LGELDFPEQLK.C	ARO10	3.555	644.842	-0.51	Phenylpyruvate decarboxylase, catalyzes decarboxylation of phenylpyruvate to phenylacetaldehyde, which is the first specific step in the Ehrlich pathway
YDR385W	R.AEQLYEGPADDANCIAIK.N	EFT2	5.268	960.954	-0.34	Elongation factor 2 (EF-2), also encoded by EFT1; catalyzes ribosomal translocation during protein synthesis; contains diphthamide, the unique posttranslationally modified histidine residue specifically ADP-ribosylated by diphtheria toxin
YDR385W	R.KIWCFGPDGNGPNLVIDQTK.A	EFT2	3.605	734.706	0.81	Elongation factor 2 (EF-2), also encoded by EFT1; catalyzes ribosomal translocation during protein synthesis; contains diphthamide, the unique posttranslationally modified histidine residue specifically ADP-ribosylated by diphtheria toxin
YDR418W	K.EILGTAQSVGCR.V	RPL12B	3.01	617.317	0.1	Protein component of the large (60S) ribosomal subunit, nearly identical to Rpl12Ap; rpl12a rpl12b double mutant exhibits slow growth and slow translation; has similarity to E. coli L11 and rat L12 ribosomal proteins
YDR432W	K.NLPEGCSWQDLK.D	NPL3	2.735	695.327	-0.32	RNA-binding protein that carries poly(A)+ mRNA from the nucleus into the cytoplasm; dissociation from mRNAs is promoted by Mtr10p; phosphorylated by Sky1p in the cytoplasm
YDR450W	R.YSNLVCK.K	RPS18A	2.032	413.71	0.06	Protein component of the small (40S) ribosomal subunit; nearly identical to Rps18Bp and has similarity to E. coli S13 and rat S18 ribosomal proteins
YDR487C	R.GHTEAGVDLCK.L	RIB3	2.812	565.269	0.26	3,4-dihydroxy-2-butanone-4-phosphate synthase (DHBP synthase), required for riboflavin biosynthesis from ribulose-5-phosphate, also has an unrelated function in mitochondrial respiration
YEL037C	K.LAQSISCEESQIK.L	RAD23	3.596	718.358	-0.18	Protein with ubiquitin-like N terminus, recognizes and binds damaged DNA (with Rad4p) during nucleotide excision repair; regulates Rad4p levels, subunit of Nuclear Excision Repair Factor 2 (NEF2); homolog of human HR23A and HR23B proteins
YEL047C	K.ASSGINGACTETQR.H	YEL047C	4.377	697.82	-0.27	Soluble fumarate reductase, required with isoenzyme Osm1p for anaerobic growth; may interact with ribosomes, based on co-purification experiments; authentic, non-tagged protein is detected in purified mitochondria in high-throughput studies
YEL071W	K.VRDFDPVSGTFK.C	DLD3	2.936	456.57	0.19	D-lactate dehydrogenase, part of the retrograde regulon which consists of genes whose expression is stimulated by damage to mitochondria and reduced in cells grown with glutamate as the sole nitrogen source, located in the cytoplasm
YER025W	R.SFKSDKEISPK.C	GCD11	3.004	422.563	-0.24	Gamma subunit of the translation initiation factor eIF2, involved in the identification of the start codon; binds GTP when forming the ternary complex with GTP and tRNAi-Met
YER043C	K.SKFDNLYGCR.E	SAH1	3.127	601.785	-0.42	S-adenosyl-L-homocysteine hydrolase, catabolizes S-adenosyl-L-homocysteine which is formed after donation of the activated methyl group of S-adenosyl-L-methionine (AdoMet) to an acceptor
YER043C	K.VAVVAGYGDVGKGCAAALR.G	SAH1	4.202	888.975	-0.18	S-adenosyl-L-homocysteine hydrolase, catabolizes S-adenosyl-L-homocysteine which is formed after donation of the activated methyl group of S-adenosyl-L-methionine (AdoMet) to an acceptor
YER080W	K.IGPSVER.C	YER080W	1.698	379.214	0.6	Putative protein of unknown function; the authentic, non-tagged protein is detected in highly purified mitochondria in high-throughput studies; null mutant displays decreased frequency of mitochondrial genome loss (petite formation)
YER089C	K.SQNLLVCGNAGDSR.T	PTC2	3.126	717.343	-0.98	Type 2C protein phosphatase; dephosphorylates Hog1p to limit maximal osmostress induced kinase activity; dephosphorylates Ire1p to downregulate the unfolded protein response; dephosphorylates Cdc28p; role in DNA checkpoint inactivation
YER091C	K.GMLTGPITCLR.W	MET6	3.078	589.307	0.46	Cobalamin-independent methionine synthase, involved in amino acid biosynthesis; requires a minimum of two glutamates on the methyltetrahydrofolate substrate, similar to bacterial metE homologs
YER110C	R.AYANASGCVAR.M	KAP123	3.461	541.756	-0.92	Karyopherin beta, mediates nuclear import of ribosomal proteins prior to assembly into ribosomes and import of histones H3 and H4; localizes to the nuclear pore, nucleus, and cytoplasm; exhibits genetic interactions with RAI1
YER136W	K.APLVIADPTYFPEK.C	GDI1	4.471	780.919	-0.29	GDP dissociation inhibitor, regulates vesicle traffic in secretory pathways by regulating the dissociation of GDP from the Sec4/Ypt/rab family of GTP binding proteins
YFL039C	K.QEYDESGPSIVHHK.C	ACT1	2.833	813.381	0.01	Actin, structural protein involved in cell polarization, endocytosis, and other cytoskeletal functions
YFR006W	R.QYTSDITR.C	YFR006W	2.03	492.244	0.91	Putative X-Pro aminopeptidase; green fluorescent protein (GFP)-fusion protein localizes to the cytoplasm; YFR006W is not an essential gene
YGL008C	K.KVTAVVESPEGERIVCVK.G	PMA1	4.819	972.035	-0.04	Plasma membrane H+-ATPase, pumps protons out of the cell; major regulator of cytoplasmic pH and plasma membrane potential; part of the P2 subgroup of cation-transporting ATPases
YGL019W	R.QYPSTEEDWEEFAK.C	CKB1	3.679	879.878	-0.16	Beta regulatory subunit of casein kinase 2, a Ser/Thr protein kinase with roles in cell growth and proliferation; the holoenzyme also contains CKA1, CKA2 and CKB2, the many substrates include transcription factors and all RNA polymerases
YGL026C	K.IVTLCGDAPEGK.R	TRP5	3.208	601.807	-1.16	Tryptophan synthase involved in tryptophan biosynthesis, regulated by the general control system of amino acid biosynthesis
YGL026C	K.NVIAETGAGQHGVATATACAK.F	TRP5	7.712	985.488	-3.26	Tryptophan synthase involved in tryptophan biosynthesis, regulated by the general control system of amino acid biosynthesis
YGL043W	K.IANGDITPEFLATCDAK.D	DST1	3.314	889.936	1.24	General transcription elongation factor TFIIS, enables RNA polymerase II to read through blocks to elongation by stimulating cleavage of nascent transcripts stalled at transcription arrest sites
YGL049C	K.LVLHYLVAR.C	TIF4632	1.433	361.894	-0.19	Translation initiation factor eIF4G, subunit of the mRNA cap-binding protein complex (eIF4F) that also contains eIF4E (Cdc33p); associates with the poly(A)-binding protein Pab1p, also interacts with eIF4A (Tif1p); homologous to Tif4631p
YGL135W	K.SCGVDAMSVDDLK.K	RPL1B	4.481	670.297	0	N-terminally acetylated protein component of the large (60S) ribosomal subunit, nearly identical to Rpl1Ap and has similarity to E. coli L1 and rat L10a ribosomal proteins; rpl1a rpl1b double null mutation is lethal
YGL135W	K.SCGVDAMSVDDLKK.L	RPL1B	3.454	734.345	0.46	N-terminally acetylated protein component of the large (60S) ribosomal subunit, nearly identical to Rpl1Ap and has similarity to E. coli L1 and rat L10a ribosomal proteins; rpl1a rpl1b double null mutation is lethal
YGL234W	K.DAPGCVIENGTK.L	ADE5	2.941	602.287	-0.37	Bifunctional enzyme of the 'de novo' purine nucleotide biosynthetic pathway, contains aminoimidazole ribotide synthetase and glycinamide ribotide synthetase activities
YGL234W	K.DAPGCVIENGTKLY.-	ADE5	2.982	740.36	-1.08	Bifunctional enzyme of the 'de novo' purine nucleotide biosynthetic pathway, contains aminoimidazole ribotide synthetase and glycinamide ribotide synthetase activities
YGL234W	R.TAVDTVYEAVK.C	ADE5	2.506	598.314	-0.59	Bifunctional enzyme of the 'de novo' purine nucleotide biosynthetic pathway, contains aminoimidazole ribotide synthetase and glycinamide ribotide synthetase activities
YGL245W	K.AYCDDTPTEK.M	GUS1	2.289	571.737	-0.39	Glutamyl-tRNA synthetase (GluRS), forms a complex with methionyl-tRNA synthetase (Mes1p) and Arc1p; complex formation increases the catalytic efficiency of both tRNA synthetases and ensures their correct localization to the cytoplasm
YGR061C	K.ATNIAHVCGLQDK.V	ADE6	3.951	685.348	-0.69	Formylglycinamidine-ribonucleotide (FGAM)-synthetase, catalyzes a step in the 'de novo' purine nucleotide biosynthetic pathway
YGR061C	K.TVPGFPLLENLNDISLK.C	ADE6	2.717	935.52	0.59	Formylglycinamidine-ribonucleotide (FGAM)-synthetase, catalyzes a step in the 'de novo' purine nucleotide biosynthetic pathway
YGR094W	K.ESYPNGIPQCGTDAMR.F	VAS1	2.478	869.879	-0.66	Mitochondrial and cytoplasmic valyl-tRNA synthetase
YGR094W	K.NLYVGQEDNEMTIPTCSR.S	VAS1	3.273	1043.46	-0.74	Mitochondrial and cytoplasmic valyl-tRNA synthetase
YGR124W	K.ADWGCAEDPSGR.Y	ASN2	3.191	632.257	0.21	Asparagine synthetase, isozyme of Asn1p; catalyzes the synthesis of L-asparagine from L-aspartate in the asparagine biosynthetic pathway
YGR124W	K.NLHLADCLR.A	ASN2	2.542	352.187	-0.39	Asparagine synthetase, isozyme of Asn1p; catalyzes the synthesis of L-asparagine from L-aspartate in the asparagine biosynthetic pathway
YGR124W	R.SSQSPETVYFASELK.C	ASN2	3.704	836.907	0.56	Asparagine synthetase, isozyme of Asn1p; catalyzes the synthesis of L-asparagine from L-aspartate in the asparagine biosynthetic pathway
YGR159C	K.EIDGRPINCDMSTSKPAGNNDR.A	NSR1	5.093	797.366	0.33	Nucleolar protein that binds nuclear localization sequences, required for pre-rRNA processing and ribosome biogenesis
YGR192C	K.IVSNASCTTNCLAPLAK.V	TDH3	5.101	853.434	-0.44	Glyceraldehyde-3-phosphate dehydrogenase, isozyme 3, involved in glycolysis and gluconeogenesis; tetramer that catalyzes the reaction of glyceraldehyde-3-phosphate to 1,3 bis-phosphoglycerate; detected in the cytoplasm and cell-wall
YGR240C	-.MQSQDSCYGVAFR.S	PFK1	3.985	754.319	-0.4	Alpha subunit of heterooctameric phosphofructokinase involved in glycolysis, indispensable for anaerobic growth, activated by fructose-2,6-bisphosphate and AMP, mutation inhibits glucose induction of cell cycle-related genes
YGR254W	K.IGLDCASSEFFK.D	ENO1	3.59	658.813	0.29	Enolase I, a phosphopyruvate hydratase that catalyzes the conversion of 2-phosphoglycerate to phosphoenolpyruvate during glycolysis and the reverse reaction during gluconeogenesis; expression is repressed in response to glucose
YGR279C	R.GITYTPYESSGACK.S	SCW4	2.62	738.837	-0.39	Cell wall protein with similarity to glucanases; scw4 scw10 double mutants exhibit defects in mating
YGR279C	R.LYGTDCNQVENVFK.A	SCW4	3.623	815.382	-1.1	Cell wall protein with similarity to glucanases; scw4 scw10 double mutants exhibit defects in mating
YGR285C	R.AQYDSCDFVADVPPPK.K	ZUO1	4.873	876.399	-2.23	Cytosolic ribosome-associated chaperone that acts, together with Ssz1p and the Ssb proteins, as a chaperone for nascent polypeptide chains; contains a DnaJ domain and functions as a J-protein partner for Ssb1p and Ssb2p
YHL001W	K.WAAAGVCEK.W	RPL14B	2.422	467.726	-0.05	Protein component of the large (60S) ribosomal subunit, nearly identical to Rpl14Ap and has similarity to rat L14 ribosomal protein
YHR007C	K.GVIYDCPNSR.L	ERG11	2.751	562.263	-0.71	Lanosterol 14-alpha-demethylase, catalyzes the C-14 demethylation of lanosterol to form 4,4''-dimethyl cholesta-8,14,24-triene-3-beta-ol in the ergosterol biosynthesis pathway; member of the cytochrome P450 family
YHR019C	K.YGTCPHGGYGIGTER.I	DED81	3.518	784.351	-0.39	Cytosolic asparaginyl-tRNA synthetase, required for protein synthesis, catalyzes the specific attachment of asparagine to its cognate tRNA
YHR025W	K.YQWNPAIK.C	THR1	2.199	510.269	0.21	Homoserine kinase, conserved protein required for threonine biosynthesis; expression is regulated by the GCN4-mediated general amino acid control pathway
YHR068W	K.HGADCLEANQDVDSPIWTPSK.M	DYS1	3.366	761.683	-0.75	Deoxyhypusine synthase, catalyzes formation of deoxyhypusine, the first step in hypusine biosynthesis; triggers posttranslational hypusination of translation elongation factor eIF-5A and regulates its intracellular levels; tetrameric
YHR068W	K.KGCFDEEGYQK.T	DYS1	3.683	652.284	-0.64	Deoxyhypusine synthase, catalyzes formation of deoxyhypusine, the first step in hypusine biosynthesis; triggers posttranslational hypusination of translation elongation factor eIF-5A and regulates its intracellular levels; tetrameric
YHR068W	K.MVDAVVTSAGGVEEDLIK.C	DYS1	3.837	924.965	-1.84	Deoxyhypusine synthase, catalyzes formation of deoxyhypusine, the first step in hypusine biosynthesis; triggers posttranslational hypusination of translation elongation factor eIF-5A and regulates its intracellular levels; tetrameric
YHR104W	R.LFDGACDYGNEK.E	GRE3	3.356	666.282	0.13	Aldose reductase involved in methylglyoxal, d-xylose and arabinose metabolism; stress induced (osmotic, ionic, oxidative, heat shock, starvation and heavy metals); regulated by the HOG pathway
YHR183W	R.VLPECASDNLPVDK.D	GND1	3.247	750.374	0.25	6-phosphogluconate dehydrogenase (decarboxylating), catalyzes an NADPH regenerating reaction in the pentose phosphate pathway; required for growth on D-glucono-delta-lactone and adaptation to oxidative stress
YHR203C	K.LSGCYAPRPSAGPHK.L	RPS4B	4.827	770.888	0.05	Protein component of the small (40S) ribosomal subunit; identical to Rps4Ap and has similarity to rat S4 ribosomal protein
YIL078W	K.NSSCYFLGDATNDSLQR.V	THS1	5.313	945.917	-0.58	Threonyl-tRNA synthetase, essential cytoplasmic protein
YIL078W	K.VPDGGATTVYR.C	THS1	3.107	568.29	-0.53	Threonyl-tRNA synthetase, essential cytoplasmic protein
YIL116W	K.IYNLEPYR.C	HIS5	3.003	534.28	0.49	Histidinol-phosphate aminotransferase, catalyzes the seventh step in histidine biosynthesis; responsive to general control of amino acid biosynthesis; mutations cause histidine auxotrophy and sensitivity to Cu, Co, and Ni salts
YJL080C	K.FACQIDIPNEENNNASK.D	SCP160	4.111	953.933	-0.79	Essential RNA-binding G protein effector of mating response pathway, mainly associated with nuclear envelope and ER, interacts in mRNA-dependent manner with translating ribosomes via multiple KH domains, similar to vertebrate vigilins
YJL080C	K.KLTKPINAVIEVPSK.C	SCP160	3.938	819.004	0.49	Essential RNA-binding G protein effector of mating response pathway, mainly associated with nuclear envelope and ER, interacts in mRNA-dependent manner with translating ribosomes via multiple KH domains, similar to vertebrate vigilins
YJL080C	K.LTKPINAVIEVPSK.C	SCP160	2.374	503.64	0.5	Essential RNA-binding G protein effector of mating response pathway, mainly associated with nuclear envelope and ER, interacts in mRNA-dependent manner with translating ribosomes via multiple KH domains, similar to vertebrate vigilins
YJL121C	K.WVDDFAK.C	RPE1	2.324	440.714	-0.09	D-ribulose-5-phosphate 3-epimerase, catalyzes a reaction in the non-oxidative part of the pentose-phosphate pathway; mutants are sensitive to oxidative stress
YJL130C	R.LAVDYSVPLVTNVK.C	URA2	4.007	759.432	-0.23	Bifunctional carbamoylphosphate synthetase (CPSase)-aspartate transcarbamylase (ATCase), catalyzes the first two enzymatic steps in the de novo biosynthesis of pyrimidines; both activities are subject to feedback inhibition by UTP
YJL167W	K.IGTDIQDNK.C	ERG20	3.089	502.257	0.4	Farnesyl pyrophosphate synthetase, has both dimethylallyltranstransferase and geranyltranstransferase activities; catalyzes the formation of C15 farnesyl pyrophosphate units for isoprenoid and sterol biosynthesis
YJL167W	K.TLDENYGKKDSVAEAK.C	ERG20	3.332	884.441	-0.86	Farnesyl pyrophosphate synthetase, has both dimethylallyltranstransferase and geranyltranstransferase activities; catalyzes the formation of C15 farnesyl pyrophosphate units for isoprenoid and sterol biosynthesis
YJL172W	K.TILGAPFCPR.R	CPS1	2.405	537.792	-0.12	Vacuolar carboxypeptidase yscS; expression is induced under low-nitrogen conditions
YJR007W	R.VSSEDIIKCEEK.Y	SUI2	2.835	690.339	-0.46	Alpha subunit of the translation initiation factor eIF2, involved in the identification of the start codon; phosphorylation of Ser51 is required for regulation of translation by inhibiting the exchange of GDP for GTP
YJR016C	K.LAECDNIGEYIK.K	ILV3	4.199	684.328	-1.62	Dihydroxyacid dehydratase, catalyzes third step in the common pathway leading to biosynthesis of branched-chain amino acids
YJR105W	K.SMYQVQNDIGTGK.C	ADO1	4.109	728.84	-0.49	Adenosine kinase, required for the utilization of S-adenosylmethionine (AdoMet); may be involved in recycling adenosine produced through the methyl cycle
YJR123W	K.AQCPIIER.L	RPS5	1.712	465.247	0.21	Protein component of the small (40S) ribosomal subunit, the least basic of the non-acidic ribosomal proteins; phosphorylated in vivo; essential for viability; has similarity to E. coli S7 and rat S5 ribosomal proteins
YKL035W	K.LNGGLGTSMGCVGPK.S	UGP1	3.527	703.842	0.26	UDP-glucose pyrophosphorylase (UGPase), catalyses the reversible formation of UDP-Glc from glucose 1-phosphate and UTP, involved in a wide variety of metabolic pathways, expression modulated by Pho85p through Pho4p
YKL060C	K.EHGEPLFSSHMLDLSEETDEENISTCVK.Y	FBA1	4.007	798.854	-0.95	Fructose 1,6-bisphosphate aldolase, required for glycolysis and gluconeogenesis; catalyzes conversion of fructose 1,6 bisphosphate to glyceraldehyde-3-P and dihydroxyacetone-P; locates to mitochondrial outer surface upon oxidative stress
YKL060C	K.VNLDTDCQYAYLTGIR.D	FBA1	6.403	922.947	0.52	Fructose 1,6-bisphosphate aldolase, required for glycolysis and gluconeogenesis; catalyzes conversion of fructose 1,6 bisphosphate to glyceraldehyde-3-P and dihydroxyacetone-P; locates to mitochondrial outer surface upon oxidative stress
YKL060C	R.EQVGCKEEKPLFLVFHGGSGSTVQEFHTGIDNGVVK.V	FBA1	4.85	1291.65	0.82	Fructose 1,6-bisphosphate aldolase, required for glycolysis and gluconeogenesis; catalyzes conversion of fructose 1,6 bisphosphate to glyceraldehyde-3-P and dihydroxyacetone-P; locates to mitochondrial outer surface upon oxidative stress
YKL060C	R.SIAPAYGIPVVLHSDHCAK.K	FBA1	3.643	989.515	0.41	Fructose 1,6-bisphosphate aldolase, required for glycolysis and gluconeogenesis; catalyzes conversion of fructose 1,6 bisphosphate to glyceraldehyde-3-P and dihydroxyacetone-P; locates to mitochondrial outer surface upon oxidative stress
YKL067W	R.NVCHGSDSVDSAER.E	YNK1	2.762	738.313	0.2	Nucleoside diphosphate kinase, catalyzes the transfer of gamma phosphates from nucleoside triphosphates, usually ATP, to nucleoside diphosphates by a mechanism that involves formation of an autophosphorylated enzyme intermediate
YKL081W	K.DVDACFVK.I	TEF4	2.328	448.713	-0.15	Translation elongation factor EF-1 gamma
YKL085W	K.IHPIGELSSEEEEMLQK.C	MDH1	4.3	656.991	-0.42	Mitochondrial malate dehydrogenase, catalyzes interconversion of malate and oxaloacetate; involved in the tricarboxylic acid (TCA) cycle; phosphorylated
YKL182W	K.EVYDFTHAVGNNCEDFVSRPDR.T	FAS1	2.746	857.384	-0.1	Beta subunit of fatty acid synthetase, which catalyzes the synthesis of long-chain saturated fatty acids; contains acetyltransacylase, dehydratase, enoyl reductase, malonyl transacylase, and palmitoyl transacylase activities
YKL182W	K.NANIFSSVK.C	FAS1	2.873	490.264	-0.38	Beta subunit of fatty acid synthetase, which catalyzes the synthesis of long-chain saturated fatty acids; contains acetyltransacylase, dehydratase, enoyl reductase, malonyl transacylase, and palmitoyl transacylase activities
YKR080W	K.HHVEDLGEYSEDLLKK.C	MTD1	4.378	478.742	0.23	NAD-dependent 5,10-methylenetetrahydrafolate dehydrogenase, plays a catalytic role in oxidation of cytoplasmic one-carbon units; expression is regulated by Bas1p and Bas2p, repressed by adenine, and may be induced by inositol and choline
YLL026W	K.SNPCLIGEPGIGK.T	HSP104	3.428	642.835	0.16	Heat shock protein that cooperates with Ydj1p (Hsp40) and Ssa1p (Hsp70) to refold and reactivate previously denatured, aggregated proteins; responsive to stresses including: heat, ethanol, and sodium arsenite; involved in [PSI+] propagation
YLR022C	K.GLVANKEDLQK.C	SDO1	2.97	607.84	-0.48	Essential protein involved in 60S ribosome maturation; ortholog of the human protein (SBDS) responsible for autosomal recessive Shwachman-Bodian-Diamond Syndrome; highly conserved across archae and eukaryotes
YLR029C	R.YNWICDPVHK.H	RPL15A	3.603	425.538	-0.13	Protein component of the large (60S) ribosomal subunit, nearly identical to Rpl15Bp and has similarity to rat L15 ribosomal protein; binds to 5.8 S rRNA
YLR044C	K.NPVILADACCSR.H	PDC1	3.571	631.303	-2.95	Major of three pyruvate decarboxylase isozymes, key enzyme in alcoholic fermentation, decarboxylates pyruvate to acetaldehyde; subject to glucose-, ethanol-, and autoregulation; involved in amino acid catabolism
YLR058C	R.MEILCQQR.A	SHM2	2.117	510.752	-0.75	Cytosolic serine hydroxymethyltransferase, converts serine to glycine plus 5,10 methylenetetrahydrofolate; major isoform involved in generating precursors for purine, pyrimidine, amino acid, and lipid biosynthesis
YLR058C	R.VEYICEK.I	SHM2	2.245	442.215	0.04	Cytosolic serine hydroxymethyltransferase, converts serine to glycine plus 5,10 methylenetetrahydrofolate; major isoform involved in generating precursors for purine, pyrimidine, amino acid, and lipid biosynthesis
YLR058C	R.YYGGNEHIDRMEILCQQR.A	SHM2	2.517	742.345	-0.39	Cytosolic serine hydroxymethyltransferase, converts serine to glycine plus 5,10 methylenetetrahydrofolate; major isoform involved in generating precursors for purine, pyrimidine, amino acid, and lipid biosynthesis
YLR060W	R.YCDEPFTVEPVEIVSEHNGQSR.L	FRS1	3.108	845.719	-1.59	Beta subunit of cytoplasmic phenylalanyl-tRNA synthetase, forms a tetramer with Frs2p to generate active enzyme; sequence is evolutionarily distant from mitochondrial phenylalanyl-tRNA synthetase (Msf1p), but substrate binding is similar
YLR075W	K.MLSCAGADR.L	RPL10	2.598	470.205	-0.25	Protein component of the large (60S) ribosomal subunit, responsible for joining the 40S and 60S subunits; regulates translation initiation; has similarity to rat L10 ribosomal protein and to members of the QM gene family
YLR075W	K.MLSCAGADRLQQGMR.G	RPL10	3.266	818.889	-0.76	Protein component of the large (60S) ribosomal subunit, responsible for joining the 40S and 60S subunits; regulates translation initiation; has similarity to rat L10 ribosomal protein and to members of the QM gene family
YLR089C	K.LLESTGICTVPGSGFGQEPGTYHLR.T	ALT1	4.399	873.768	1.33	Putative alanine transaminase (glutamic pyruvic transaminase); the authentic, non-tagged protein is detected in highly purified mitochondria in high-throughput studies
YLR109W	K.FASDPGCAFTK.S	AHP1	2.385	572.261	-0.14	Thiol-specific peroxiredoxin, reduces hydroperoxides to protect against oxidative damage; function in vivo requires covalent conjugation to Urm1p
YLR109W	K.FQYIAISQSDADSESCK.M	AHP1	4.713	946.422	-0.74	Thiol-specific peroxiredoxin, reduces hydroperoxides to protect against oxidative damage; function in vivo requires covalent conjugation to Urm1p
YLR197W	R.QLYDYLCEK.M	SIK1	2.214	587.776	0.45	Essential evolutionarily-conserved nucleolar protein component of the box C/D snoRNP complexes that direct 2'-O-methylation of pre-rRNA during its maturation; overexpression causes spindle orientation defects
YLR216C	R.LIENQQCDQENNKPLR.D	CPR6	4.5	971.476	0	Peptidyl-prolyl cis-trans isomerase (cyclophilin), catalyzes the cis-trans isomerization of peptide bonds N-terminal to proline residues; binds to Hsp82p and contributes to chaperone activity
YLR216C	R.LIENQQCDQENNKPLRDVK.I	CPR6	3.522	762.05	-0.16	Peptidyl-prolyl cis-trans isomerase (cyclophilin), catalyzes the cis-trans isomerization of peptide bonds N-terminal to proline residues; binds to Hsp82p and contributes to chaperone activity
YLR249W	K.EIEEHCSMLGLDPEIVSHSR.I	YEF3	4.418	766.355	-1.86	Translational elongation factor 3, stimulates the binding of aminoacyl-tRNA (AA-tRNA) to ribosomes by releasing EF-1 alpha from the ribosomal complex; contains two ABC cassettes; binds and hydrolyses ATP
YLR249W	K.GNFTEFVKK.C	YEF3	1.746	357.194	0.09	Translational elongation factor 3, stimulates the binding of aminoacyl-tRNA (AA-tRNA) to ribosomes by releasing EF-1 alpha from the ribosomal complex; contains two ABC cassettes; binds and hydrolyses ATP
YLR249W	K.SAVIIDNMCK.L	YEF3	2.533	555.27	-0.33	Translational elongation factor 3, stimulates the binding of aminoacyl-tRNA (AA-tRNA) to ribosomes by releasing EF-1 alpha from the ribosomal complex; contains two ABC cassettes; binds and hydrolyses ATP
YLR249W	R.AIANGQVDGFPTQEECR.T	YEF3	5.331	917.923	-0.07	Translational elongation factor 3, stimulates the binding of aminoacyl-tRNA (AA-tRNA) to ribosomes by releasing EF-1 alpha from the ribosomal complex; contains two ABC cassettes; binds and hydrolyses ATP
YLR301W	K.NWDSGCVEETGAVYPFGADK.E	YLR301W	5.273	1072.96	-0.87	Protein of unknown function that interacts with Sec72p
YLR304C	R.VGLIGSCTNSSYEDMSR.S	ACO1	3.318	909.903	-1.07	Aconitase, required for the tricarboxylic acid (TCA) cycle and also independently required for mitochondrial genome maintenance; phosphorylated; component of the mitochondrial nucleoid; mutation leads to glutamate auxotrophy
YLR314C	K.FMQSVYEK.C	CDC3	2.52	516.247	0.19	Component of the septin ring of the mother-bud neck that is required for cytokinesis; septins recruit proteins to the neck and can act as a barrier to diffusion at the membrane, and they comprise the 10nm filaments seen with EM
YLR355C	K.YGMDYMYDACSTTAR.R	ILV5	3.906	882.339	-0.33	Acetohydroxyacid reductoisomerase, mitochondrial protein involved in branched-chain amino acid biosynthesis, also required for maintenance of wild-type mitochondrial DNA and found in mitochondrial nucleoids
YLR388W	K.YGLNICR.Q	RPS29A	2.524	419.716	-0.21	Protein component of the small (40S) ribosomal subunit; nearly identical to Rps29Bp and has similarity to rat S29 and E. coli S14 ribosomal proteins
YML008C	K.VYAIEATCHAPK.L	ERG6	1.697	434.888	-0.17	Delta(24)-sterol C-methyltransferase, converts zymosterol to fecosterol in the ergosterol biosynthetic pathway by methylating position C-24; localized to both lipid particles and mitochondrial outer membrane
YML008C	R.FTGCNVIGLNNNDYQIAK.A	ERG6	3.831	992.482	-0.93	Delta(24)-sterol C-methyltransferase, converts zymosterol to fecosterol in the ergosterol biosynthetic pathway by methylating position C-24; localized to both lipid particles and mitochondrial outer membrane
YML070W	K.SEPHITELDNQVGDGDCGYTLVAGVK.G	DAK1	5.016	906.428	-1.58	Dihydroxyacetone kinase, required for detoxification of dihydroxyacetone (DHA); involved in stress adaptation
YML072C	K.ANNDGVAVFDEECSFK.A	TCB3	5.005	872.878	0.6	Lipid-binding protein, localized to the bud via specific mRNA transport; non-tagged protein detected in a phosphorylated state in mitochondria; GFP-fusion protein localizes to the cell periphery; C-termini of Tcb1p, Tcb2p and Tcb3p interact
YML126C	K.YFDYNVFHVPTCK.L	ERG13	1.873	544.922	0.41	3-hydroxy-3-methylglutaryl-CoA (HMG-CoA) synthase, catalyzes the formation of HMG-CoA from acetyl-CoA and acetoacetyl-CoA; involved in the second step in mevalonate biosynthesis
YMR092C	R.NFTTHLSYDPTTNAIAYPCGK.S	AIP1	2.468	772.032	0.17	Actin cortical patch component, interacts with the actin depolymerizing factor cofilin; required to restrict cofilin localization to cortical patches; contains WD repeats
YMR120C	K.YTQSNSVCYAR.N	ADE17	3.713	646.291	0.26	Enzyme of 'de novo' purine biosynthesis containing both 5-aminoimidazole-4-carboxamide ribonucleotide transformylase and inosine monophosphate cyclohydrolase activities, isozyme of Ade16p; ade16 ade17 mutants require adenine and histidine
YMR205C	R.GWSAEGGTNIGTAR.C	PFK2	4.558	688.831	-0.44	Beta subunit of heterooctameric phosphofructokinase involved in glycolysis, indispensable for anaerobic growth, activated by fructose-2,6-bisphosphate and AMP, mutation inhibits glucose induction of cell cycle-related genes
YMR222C	K.VQGLYNSCTEDSR.T	FSH2	3.812	736.327	-0.5	Serine hydrolase that localizes to the cytoplasm; sequence is similar to Fsh1p and Fsh3p
YMR260C	R.DFQDDQCDVVHK.Y	TIF11	3.066	724.809	-0.64	Translation initiation factor eIF1A, essential protein that forms a complex with Sui1p (eIF1) and the 40S ribosomal subunit and scans for the start codon; C-terminus associates with Fun12p (eIF5B); N terminus interacts with eIF2 and eIF3
YMR260C	R.VEASCFDGNK.R	TIF11	2.945	535.234	-0.62	Translation initiation factor eIF1A, essential protein that forms a complex with Sui1p (eIF1) and the 40S ribosomal subunit and scans for the start codon; C-terminus associates with Fun12p (eIF5B); N terminus interacts with eIF2 and eIF3
YMR261C	R.VCSPSQEASASSISASR.S	TPS3	4.287	833.889	0.91	Regulatory subunit of trehalose-6-phosphate synthase/phosphatase complex, which synthesizes the storage carbohydrate trehalose; expression is induced by stress conditions and repressed by the Ras-cAMP pathway
YMR290C	K.QNNAAPEGEQTTCVEK.F	HAS1	3.558	859.886	-0.28	ATP-dependent RNA helicase; localizes to both the nuclear periphery and nucleolus; highly enriched in nuclear pore complex fractions; constituent of 66S pre-ribosomal particles
YMR307W	K.YGAYSFCTPK.E	GAS1	2.549	568.758	1.06	Beta-1,3-glucanosyltransferase, required for cell wall assembly; localizes to the cell surface via a glycosylphosphatidylinositol (GPI) anchor
YNL134C	K.IGPQGALLGCDAAGQIVK.L	YNL134C	4.712	855.965	0.75	Putative protein of unknown function with similarity to dehydrogenases from other model organisms; green fluorescent protein (GFP)-fusion protein localizes to both the cytoplasm and nucleus and is induced by the DNA-damaging agent MMS
YNL135C	R.GSPFQCNIGVGQVIK.G	FPR1	4.14	773.906	-0.03	Peptidyl-prolyl cis-trans isomerase (PPIase), binds to the drugs FK506 and rapamycin; also binds to the nonhistone chromatin binding protein Hmo1p and may regulate its assembly or function
YNL138W	K.NNKPSDSGADANTTNEPSAENAPEVEQDPK.C	SRV2	5.482	1042.8	-0.54	CAP (cyclase-associated protein) subunit of adenylyl cyclase complex; N-terminus binds adenylyl cyclase and facilitates activation by RAS; C-terminus binds ADP-actin monomers, facilitating regulation of actin dynamics and cell morphogenesis
YNL241C	K.SEDGSKPAYVDDDTVDKDSK.C	ZWF1	4.652	724.325	-1.29	Glucose-6-phosphate dehydrogenase (G6PD), catalyzes the first step of the pentose phosphate pathway; involved in adapting to oxidatve stress; homolog of the human G6PD which is deficient in patients with hemolytic anemia
YNL301C	K.AGGECITLDQLAVR.A	RPL18B	4.174	723.375	0.36	Protein component of the large (60S) ribosomal subunit, identical to Rpl18Ap and has similarity to rat L18 ribosomal protein
YNR016C	K.TIIGSEDGLGVECLR.G	ACC1	2.961	781.398	-0.2	Acetyl-CoA carboxylase, biotin containing enzyme that catalyzes the carboxylation of acetyl-CoA to form malonyl-CoA; required for de novo biosynthesis of long-chain fatty acids
YNR046W	K.FLTTNFLK.C	TRM112	2.182	492.282	0.31	Subunit of an adoMet-dependent tRNA methyltransferase (MTase) complex (Trm11p-Trm112p), required for the methylation of the guanosine nucleotide at position 10 (m2G10) in tRNAs; putative zinc binding subunit of other MTase-related proteins
YOL086C	R.ANGTTVLVGMPAGAK.C	ADH1	3.48	701.871	-0.49	Alcohol dehydrogenase, fermentative isozyme active as homo- or heterotetramers; required for the reduction of acetaldehyde to ethanol, the last step in the glycolytic pathway
YOR027W	K.FSDALNDANECVK.I	STI1	4.425	713.319	-0.32	Hsp90 cochaperone, interacts with the Ssa group of the cytosolic Hsp70 chaperones; activates the ATPase activity of Ssa1p; homolog of mammalian Hop protein
YOR027W	K.LMSFPEAIADCNK.A	STI1	3.626	727.836	0.05	Hsp90 cochaperone, interacts with the Ssa group of the cytosolic Hsp70 chaperones; activates the ATPase activity of Ssa1p; homolog of mammalian Hop protein
YOR122C	R.HDAEGVVCVR.T	PFY1	3.088	542.763	-0.67	Profilin, actin- and phosphatidylinositol 4,5-bisphosphate-binding protein, involved in cytoskeleton organization, required for normal timing of actin polymerization in response to thermal stress; localizes to plasma membrane and cytosol
YOR142W	R.LVGPNCPGIINPATK.V	LSC1	3.805	747.411	0.18	Alpha subunit of succinyl-CoA ligase, which is a mitochondrial enzyme of the TCA cycle that catalyzes the nucleotide-dependent conversion of succinyl-CoA to succinate; phosphorylated
YOR204W	R.DLMACAQTGSGK.T	DED1	3.596	591.268	-0.05	ATP-dependent DEAD (Asp-Glu-Ala-Asp)-box RNA helicase, required for translation initiation of all yeast mRNAs; mutations in human DEAD-box DBY are a frequent cause of male infertility
YOR204W	R.HIVEDCDMTPVGER.Q	DED1	3.058	808.857	1.25	ATP-dependent DEAD (Asp-Glu-Ala-Asp)-box RNA helicase, required for translation initiation of all yeast mRNAs; mutations in human DEAD-box DBY are a frequent cause of male infertility
YOR209C	K.IICYSDSLNVEK.A	NPT1	3.622	692.345	-0.2	Nicotinate phosphoribosyltransferase, acts in the salvage pathway of NAD+ biosynthesis; required for silencing at rDNA and telomeres and has a role in silencing at mating-type loci; localized to the nucleus
YOR224C	R.IEAASTTQDQCK.L	RPB8	3.017	647.801	0.21	RNA polymerase subunit ABC14.5, common to RNA polymerases I, II, and III
YOR272W	K.TWDLVTAR.C	YTM1	2.788	481.259	0.28	Constituent of 66S pre-ribosomal particles, required for maturation of the large ribosomal subunit
YOR323C	K.LTEAIQCK.T	PRO2	2.919	453.242	0.53	Gamma-glutamyl phosphate reductase, catalyzes the second step in proline biosynthesis
YOR335C	K.KVEDICNEQIK.E	ALA1	3.37	440.228	0.66	Cytoplasmic alanyl-tRNA synthetase, required for protein synthesis; point mutation (cdc64-1 allele) causes cell cycle arrest at G1; lethality of null mutation is functionally complemented by human homolog
YOR362C	K.AVENGTTSIGIK.C	PRE10	4.051	595.324	-1.77	Alpha 7 subunit of the 20S proteasome
YOR375C	K.VDIALPCATQNEVSGEEAK.A	GDH1	4.226	987.477	-0.98	NADP(+)-dependent glutamate dehydrogenase, synthesizes glutamate from ammonia and alpha-ketoglutarate; rate of alpha-ketoglutarate utilization differs from Gdh3p; expression regulated by nitrogen and carbon sources
YPL028W	K.AIILGAQSIK.C	ERG10	2.679	507.321	-0.17	Acetyl-CoA C-acetyltransferase (acetoacetyl-CoA thiolase), cytosolic enzyme that transfers an acetyl group from one acetyl-CoA molecule to another, forming acetoacetyl-CoA; involved in the first step in mevalonate biosynthesis
YPL061W	K.NAGQICSSGSR.I	ALD6	3.632	540.249	0.54	Cytosolic aldehyde dehydrogenase, activated by Mg2+ and utilizes NADP+ as the preferred coenzyme; required for conversion of acetaldehyde to acetate; constitutively expressed; locates to the mitochondrial outer surface upon oxidative stress
YPL061W	R.GDVTIAINCLR.D	ALD6	3.121	587.816	0.37	Cytosolic aldehyde dehydrogenase, activated by Mg2+ and utilizes NADP+ as the preferred coenzyme; required for conversion of acetaldehyde to acetate; constitutively expressed; locates to the mitochondrial outer surface upon oxidative stress
YPL117C	R.SSETSNDESGETCFSGHDEEQIK.L	IDI1	3.98	839.338	-0.06	Isopentenyl diphosphate:dimethylallyl diphosphate isomerase (IPP isomerase), catalyzes an essential activation step in the isoprenoid biosynthetic pathway; required for viability
YPL160W	K.GTGVVTCVPSNSPDDYITTK.D	CDC60	4.671	1027.49	-0.41	Cytosolic leucyl tRNA synthetase, ligates leucine to the appropriate tRNA
YPL231W	K.TLGEQLIENCK.Q	FAS2	3.441	624.319	0.53	Alpha subunit of fatty acid synthetase, which catalyzes the synthesis of long-chain saturated fatty acids; contains beta-ketoacyl reductase and beta-ketoacyl synthase activities; phosphorylated
YPR004C	R.ASVDNGLCDNSLQIGQTGK.V	YPR004C	3.852	960.46	0.01	Protein with similarity to mammalian electron transfer flavoprotein complex subunit ETF-alpha; interacts with yeast frataxin Yfh1p; null mutant displays increased frequency of mitochondrial genome loss (petite formation)
YPR035W	K.GGYPAPQGPYYCGVGAGK.V	GLN1	2.893	871.403	-1.42	Glutamine synthetase (GS), synthesizes glutamine from glutamate and ammonia; with Glt1p, forms the secondary pathway for glutamate biosynthesis from ammonia; expression regulated by nitrogen source and by amino acid limitation
YPR181C	R.SDANSNVVPVGCLYTPLK.E	SEC23	4.196	938.978	1.04	GTPase-activating protein; component of the Sec23p-Sec24p heterodimeric complex of the COPII vesicle coat, involved in ER to Golgi transport and autophagy; stimulates the GDP-bound form of Sar1p

## Sheet: Expt. 2
Table S1(B). Peptides containing cysteine identified from the second experiment without the enrichment and reduction/alkylation
Reference	Peptide	Gene symbol	XCorr	Obs m/z	PPM	Annotation
YAL038W	R.AEVSDVGNAILDGADCVMLSGETAK.G	CDC19	4.902	827.721	0.49	Pyruvate kinase, functions as a homotetramer in glycolysis to convert phosphoenolpyruvate to pyruvate, the input for aerobic (TCA cycle) or anaerobic (glucose fermentation) respiration
YAR007C	K.VLEQPDGTWR.C	RFA1	3.213	600.804	0.04	Subunit of heterotrimeric Replication Protein A (RPA), which is a highly conserved single-stranded DNA binding protein involved in DNA replication, repair, and recombination
YAR010C	K.VACQLIMR.G	YAR010C	2.886	467.254	0.56	Retrotransposon TYA Gag gene co-transcribed with TYB Pol; in YARCTY1-1 TYB is mutant and probably non-functional
YBL030C	K.YAGILDCFKR.T	PET9	1.537	395.874	-0.03	Major ADP/ATP carrier of the mitochondrial inner membrane, exchanges cytosolic ADP for mitochondrially synthesized ATP; phosphorylated; required for viability in many common lab strains carrying a mutation in the polymorphic SAL1 gene
YBL050W	K.AGNEDEAGNTYVEAYK.C	SEC17	4.707	865.878	-0.53	Peripheral membrane protein required for vesicular transport between ER and Golgi and for the 'priming' step in homotypic vacuole fusion, part of the cis-SNARE complex; has similarity to alpha-SNAP
YBL050W	K.KAGNEDEAGNTYVEAYK.C	SEC17	7.354	929.925	-1.14	Peripheral membrane protein required for vesicular transport between ER and Golgi and for the 'priming' step in homotypic vacuole fusion, part of the cis-SNARE complex; has similarity to alpha-SNAP
YBL076C	K.LGITGKDDVFKYGLENYNNECR.S	ILS1	5.196	850.076	0.5	Cytoplasmic isoleucine-tRNA synthetase, target of the G1-specific inhibitor reveromycin A
YBL076C	K.YGLENYNNECR.S	ILS1	3.962	687.791	0.03	Cytoplasmic isoleucine-tRNA synthetase, target of the G1-specific inhibitor reveromycin A
YBL087C	R.ISLGLPVGAIMNCADNSGAR.N	RPL23A	3.485	987.989	-1.03	Protein component of the large (60S) ribosomal subunit, identical to Rpl23Bp and has similarity to E. coli L14 and rat L23 ribosomal proteins
YBR025C	K.STFFQAITR.C	OLA1	2.787	535.785	0.56	P-loop ATPase with similarity to human OLA1 and bacterial YchF; identified as specifically interacting with the proteasome; protein levels are induced by hydrogen peroxide
YBR031W	R.SGQGAFGNMCR.G	RPL4A	2.963	572.237	-0.38	N-terminally acetylated protein component of the large (60S) ribosomal subunit, nearly identical to Rpl4Bp and has similarity to E. coli L4 and rat L4 ribosomal proteins
YBR078W	K.KLQSNGAIQGDSFVCK.N	ECM33	5.02	847.93	-0.7	GPI-anchored protein of unknown function, has a possible role in apical bud growth; GPI-anchoring on the plasma membrane crucial to function; phosphorylated in mitochondria; similar to Sps2p and Pst1p
YBR118W	K.FVPSKPMCVEAFSEYPPLGR.F	TEF2	3.305	757.371	-0.56	Translational elongation factor EF-1 alpha; also encoded by TEF1; functions in the binding reaction of aminoacyl-tRNA (AA-tRNA) to ribosomes
YBR118W	R.GNVCGDAKNDPPK.G	TEF2	2.271	657.809	0.21	Translational elongation factor EF-1 alpha; also encoded by TEF1; functions in the binding reaction of aminoacyl-tRNA (AA-tRNA) to ribosomes
YBR130C	K.NSSAIEQSCSEK.L	SHE3	3.77	641.782	-0.38	Protein that acts as an adaptor between Myo4p and the She2p-mRNA complex; part of the mRNA localization machinery that restricts accumulation of certain proteins to the bud; also required for cortical ER inheritance
YBR218C	R.LDGGNAYAGATISPHYDSMLVK.C	PYC2	3.339	766.036	0.91	Pyruvate carboxylase isoform, cytoplasmic enzyme that converts pyruvate to oxaloacetate; highly similar to isoform Pyc1p but differentially regulated; mutations in the human homolog are associated with lactic acidosis
YBR263W	R.YYGGNEIIDKSESLCQAR.A	SHM1	2.537	682.658	-0.34	Mitochondrial serine hydroxymethyltransferase, converts serine to glycine plus 5,10 methylenetetrahydrofolate; involved in generating precursors for purine, pyrimidine, amino acid, and lipid biosynthesis; reverse reaction generates serine
YBR286W	K.LVEIPNLGCEEK.D	APE3	3.14	672.347	-0.51	Vacuolar aminopeptidase Y, processed to mature form by Prb1p
YCL030C	K.FHAAQLPTETLEVETQPGVLCSR.F	HIS4	3.593	842.761	0.69	Multifunctional enzyme containing phosphoribosyl-ATP pyrophosphatase, phosphoribosyl-AMP cyclohydrolase, and histidinol dehydrogenase activities; catalyzes the second, third, ninth and tenth steps in histidine biosynthesis
YCL030C	K.LLQISTDCDSDALK.F	HIS4	3.337	761.376	-1.75	Multifunctional enzyme containing phosphoribosyl-ATP pyrophosphatase, phosphoribosyl-AMP cyclohydrolase, and histidinol dehydrogenase activities; catalyzes the second, third, ninth and tenth steps in histidine biosynthesis
YCL030C	K.LVDNAGSVFVGAYTPESCGDYSSGTNHTLPTYGYAR.Q	HIS4	4	1257.24	-1.28	Multifunctional enzyme containing phosphoribosyl-ATP pyrophosphatase, phosphoribosyl-AMP cyclohydrolase, and histidinol dehydrogenase activities; catalyzes the second, third, ninth and tenth steps in histidine biosynthesis
YCL050C	K.LLCALDNEESDKR.H	APA1	2.999	753.367	0.43	Diadenosine 5',5''-P1,P4-tetraphosphate phosphorylase I (AP4A phosphorylase), involved in catabolism of bis(5'-nucleosidyl) tetraphosphates; has similarity to Apa2p
YCR031C	K.ADRDESSPYAAMLAAQDVAAK.C	RPS14A	3.99	732.68	0.17	Ribosomal protein 59 of the small subunit, required for ribosome assembly and 20S pre-rRNA processing; mutations confer cryptopleurine resistance; nearly identical to Rps14Bp and similar to E. coli S11 and rat S14 ribosomal proteins
YCR031C	K.VKADRDESSPYAAMLAAQDVAAK.C	RPS14A	5.436	1212.1	1.23	Ribosomal protein 59 of the small subunit, required for ribosome assembly and 20S pre-rRNA processing; mutations confer cryptopleurine resistance; nearly identical to Rps14Bp and similar to E. coli S11 and rat S14 ribosomal proteins
YDL014W	K.ANCIDSTVDAETVFAR.E	NOP1	2.925	856.401	-0.44	Nucleolar protein, component of the small subunit processome complex, which is required for processing of pre-18S rRNA; has similarity to mammalian fibrillarin
YDL061C	R.VCSSHTGLVR.K	RPS29B	2.342	529.774	-1.16	Protein component of the small (40S) ribosomal subunit; nearly identical to Rps29Ap and has similarity to rat S29 and E. coli S14 ribosomal proteins
YDL066W	K.DLALACGNNER.S	IDP1	3.048	588.278	0.77	Mitochondrial NADP-specific isocitrate dehydrogenase, catalyzes the oxidation of isocitrate to alpha-ketoglutarate; not required for mitochondrial respiration and may function to divert alpha-ketoglutarate to biosynthetic processes
YDL066W	K.RGELDNTPALCK.F	IDP1	3.534	658.835	-0.17	Mitochondrial NADP-specific isocitrate dehydrogenase, catalyzes the oxidation of isocitrate to alpha-ketoglutarate; not required for mitochondrial respiration and may function to divert alpha-ketoglutarate to biosynthetic processes
YDL088C	R.IFHNHDTGCDENDSTVNK.S	ASM4	3.544	682.625	-0.21	Nuclear pore complex subunit, part of a subcomplex also containing Nup53p, Nup170p, and Pse1p
YDL131W	R.VGIADTVGCANPR.Q	LYS21	3.611	636.822	0.1	Homocitrate synthase isozyme, catalyzes the condensation of acetyl-CoA and alpha-ketoglutarate to form homocitrate, which is the first step in the lysine biosynthesis pathway; highly similar to the other isozyme, Lys20p
YDL171C	K.VIVVGGGDTGNDCLGTSVR.H	GLT1	4.07	909.956	1.53	NAD(+)-dependent glutamate synthase (GOGAT), synthesizes glutamate from glutamine and alpha-ketoglutarate; with Gln1p, forms the secondary pathway for glutamate biosynthesis from ammonia; expression regulated by nitrogen source
YDL185W	K.LNLCAEYK.D	TFP1	2.607	477.242	0.29	Vacuolar ATPase V1 domain subunit A containing the catalytic nucleotide binding sites; protein precursor undergoes self-catalyzed splicing to yield the extein Tfp1p and the intein Vde (PI-SceI), which is a site-specific endonuclease
YDL229W	R.TFTTCADNQTTVQFPVYQGER.V	SSB1	4.154	802.706	0.35	Cytoplasmic ATPase that is a ribosome-associated molecular chaperone, functions with J-protein partner Zuo1p; may be involved in folding of newly-made polypeptide chains; member of the HSP70 family; interacts with phosphatase subunit Reg1p
YDR037W	K.EICNAYTELNDPFDQR.A	KRS1	4.129	964.428	-0.62	Lysyl-tRNA synthetase; also identified as a negative regulator of general control of amino acid biosynthesis
YDR037W	K.ILVDNKLECPPPLTNAR.M	KRS1	2.684	631.68	-0.47	Lysyl-tRNA synthetase; also identified as a negative regulator of general control of amino acid biosynthesis
YDR062W	R.VPLCEPEELPDDIQKENEYGTLDSPGHLYQVK.S	LCB2	4.687	914.693	0.94	Component of serine palmitoyltransferase, responsible along with Lcb1p for the first committed step in sphingolipid synthesis, which is the condensation of serine with palmitoyl-CoA to form 3-ketosphinganine
YDR120C	K.YSVAQGPPVDTK.C	TRM1	3.481	631.325	-0.31	tRNA methyltransferase, localizes to both the nucleus and mitochondrion to produce the modified base N2,N2-dimethylguanosine in tRNAs in both compartments
YDR150W	K.ATDHHLLSDSAYEDLVK.C	NUM1	4.428	957.466	0.62	Protein required for nuclear migration, localizes to the mother cell cortex and the bud tip; may mediate interactions of dynein and cytoplasmic microtubules with the cell cortex
YDR233C	K.TQEFSQMACEK.T	RTN1	3.598	651.279	-0.06	ER membrane protein that interacts with exocyst subunit Sec6p and with Yip3p; also interacts with Sbh1p; null mutant has an altered (mostly cisternal) ER morphology; member of the RTNLA (reticulon-like A) subfamily
YDR353W	R.QAITSAGSGCMAALDAEK.Y	TRR1	5.444	870.4	-0.61	Cytoplasmic thioredoxin reductase, key regulatory enzyme that determines the redox state of the thioredoxin system, which acts as a disulfide reductase system and protects cells against both oxidative and reductive stress
YDR380W	K.LGELDFPEQLK.C	ARO10	3.151	644.843	-0.05	Phenylpyruvate decarboxylase, catalyzes decarboxylation of phenylpyruvate to phenylacetaldehyde, which is the first specific step in the Ehrlich pathway
YDR385W	R.AEQLYEGPADDANCIAIK.N	EFT2	3.574	960.954	-0.46	Elongation factor 2 (EF-2), also encoded by EFT1; catalyzes ribosomal translocation during protein synthesis; contains diphthamide, the unique posttranslationally modified histidine residue specifically ADP-ribosylated by diphtheria toxin
YDR385W	R.KIWCFGPDGNGPNLVIDQTK.A	EFT2	4.923	734.706	0.33	Elongation factor 2 (EF-2), also encoded by EFT1; catalyzes ribosomal translocation during protein synthesis; contains diphthamide, the unique posttranslationally modified histidine residue specifically ADP-ribosylated by diphtheria toxin
YDR418W	K.EILGTAQSVGCR.V	RPL12B	3.235	617.317	0.21	Protein component of the large (60S) ribosomal subunit, nearly identical to Rpl12Ap; rpl12a rpl12b double mutant exhibits slow growth and slow translation; has similarity to E. coli L11 and rat L12 ribosomal proteins
YDR447C	K.RLCDEIATIQSK.R	RPS17B	4.84	688.863	-0.37	Ribosomal protein 51 (rp51) of the small (40s) subunit; nearly identical to Rps17Ap and has similarity to rat S17 ribosomal protein
YDR450W	R.RYSNLVCK.K	RPS18A	2.618	491.761	0.55	Protein component of the small (40S) ribosomal subunit; nearly identical to Rps18Bp and has similarity to E. coli S13 and rat S18 ribosomal proteins
YDR450W	R.YSNLVCK.K	RPS18A	2.232	413.71	0.07	Protein component of the small (40S) ribosomal subunit; nearly identical to Rps18Bp and has similarity to E. coli S13 and rat S18 ribosomal proteins
YDR477W	K.TSCGSPNYAAPEVISGK.L	SNF1	3.91	840.898	-0.55	AMP-activated serine/threonine protein kinase found in a complex containing Snf4p and members of the Sip1p/Sip2p/Gal83p family; required for transcription of glucose-repressed genes, thermotolerance, sporulation, and peroxisome biogenesis
YEL037C	K.LAQSISCEESQIK.L	RAD23	2.878	718.358	-0.24	Protein with ubiquitin-like N terminus, recognizes and binds damaged DNA (with Rad4p) during nucleotide excision repair; regulates Rad4p levels, subunit of Nuclear Excision Repair Factor 2 (NEF2); homolog of human HR23A and HR23B proteins
YEL047C	K.ASSGINGACTETQR.H	YEL047C	3.931	697.82	-0.32	Soluble fumarate reductase, required with isoenzyme Osm1p for anaerobic growth; may interact with ribosomes, based on co-purification experiments; authentic, non-tagged protein is detected in purified mitochondria in high-throughput studies
YEL060C	K.AITVGASTLSDDRAYFSNWGK.C	PRB1	2.614	753.706	0.04	Vacuolar proteinase B (yscB), a serine protease of the subtilisin family; involved in protein degradation in the vacuole and required for full protein degradation during sporulation
YEL071W	K.VRDFDPVSGTFK.C	DLD3	2.86	456.57	0.18	D-lactate dehydrogenase, part of the retrograde regulon which consists of genes whose expression is stimulated by damage to mitochondria and reduced in cells grown with glutamate as the sole nitrogen source, located in the cytoplasm
YER043C	K.SKFDNLYGCR.E	SAH1	2.146	401.526	-0.16	S-adenosyl-L-homocysteine hydrolase, catabolizes S-adenosyl-L-homocysteine which is formed after donation of the activated methyl group of S-adenosyl-L-methionine (AdoMet) to an acceptor
YER043C	K.VAVVAGYGDVGKGCAAALR.G	SAH1	4.12	888.974	-0.61	S-adenosyl-L-homocysteine hydrolase, catabolizes S-adenosyl-L-homocysteine which is formed after donation of the activated methyl group of S-adenosyl-L-methionine (AdoMet) to an acceptor
YER080W	K.IGPSVER.C	YER080W	1.818	379.214	-0.34	Putative protein of unknown function; the authentic, non-tagged protein is detected in highly purified mitochondria in high-throughput studies; null mutant displays decreased frequency of mitochondrial genome loss (petite formation)
YER089C	K.SQNLLVCGNAGDSR.T	PTC2	3.986	717.343	-0.36	Type 2C protein phosphatase; dephosphorylates Hog1p to limit maximal osmostress induced kinase activity; dephosphorylates Ire1p to downregulate the unfolded protein response; dephosphorylates Cdc28p; role in DNA checkpoint inactivation
YER091C	K.FWVNPDCGLK.T	MET6	2.175	589.787	0.72	Cobalamin-independent methionine synthase, involved in amino acid biosynthesis; requires a minimum of two glutamates on the methyltetrahydrofolate substrate, similar to bacterial metE homologs
YER091C	K.GMLTGPITCLR.W	MET6	3.45	589.308	0.8	Cobalamin-independent methionine synthase, involved in amino acid biosynthesis; requires a minimum of two glutamates on the methyltetrahydrofolate substrate, similar to bacterial metE homologs
YER110C	R.AYANASGCVAR.M	KAP123	3.26	541.756	-0.55	Karyopherin beta, mediates nuclear import of ribosomal proteins prior to assembly into ribosomes and import of histones H3 and H4; localizes to the nuclear pore, nucleus, and cytoplasm; exhibits genetic interactions with RAI1
YER136W	K.APLVIADPTYFPEK.C	GDI1	3.709	780.919	-0.36	GDP dissociation inhibitor, regulates vesicle traffic in secretory pathways by regulating the dissociation of GDP from the Sec4/Ypt/rab family of GTP binding proteins
YFL021W	K.SSTSVQSSATPPSNTSSNPDIK.C	GAT1	2.641	1096.52	-0.49	Transcriptional activator of genes involved in nitrogen catabolite repression; contains a GATA-1-type zinc finger DNA-binding motif; activity and localization regulated by nitrogen limitation and Ure2p
YFL039C	K.QEYDESGPSIVHHK.C	ACT1	3.673	813.382	0.79	Actin, structural protein involved in cell polarization, endocytosis, and other cytoskeletal functions
YFL039C	R.FRAPEALFHPSVLGLESAGIDQTTYNSIMK.C	ACT1	3.413	827.921	-0.48	Actin, structural protein involved in cell polarization, endocytosis, and other cytoskeletal functions
YFR006W	R.QYTSDITR.C	YFR006W	2.512	492.244	1.21	Putative X-Pro aminopeptidase; green fluorescent protein (GFP)-fusion protein localizes to the cytoplasm; YFR006W is not an essential gene
YGL008C	K.KVTAVVESPEGERIVCVK.G	PMA1	3.519	648.36	0.71	Plasma membrane H+-ATPase, pumps protons out of the cell; major regulator of cytoplasmic pH and plasma membrane potential; part of the P2 subgroup of cation-transporting ATPases
YGL019W	R.QYPSTEEDWEEFAK.C	CKB1	3.523	879.878	-0.8	Beta regulatory subunit of casein kinase 2, a Ser/Thr protein kinase with roles in cell growth and proliferation; the holoenzyme also contains CKA1, CKA2 and CKB2, the many substrates include transcription factors and all RNA polymerases
YGL049C	K.LVLHYLVAR.C	TIF4632	1.872	361.894	-0.1	Translation initiation factor eIF4G, subunit of the mRNA cap-binding protein complex (eIF4F) that also contains eIF4E (Cdc33p); associates with the poly(A)-binding protein Pab1p, also interacts with eIF4A (Tif1p); homologous to Tif4631p
YGL135W	K.SCGVDAMSVDDLK.K	RPL1B	3.949	670.297	-0.3	N-terminally acetylated protein component of the large (60S) ribosomal subunit, nearly identical to Rpl1Ap and has similarity to E. coli L1 and rat L10a ribosomal proteins; rpl1a rpl1b double null mutation is lethal
YGL135W	K.SCGVDAMSVDDLKK.L	RPL1B	3.35	734.345	0.69	N-terminally acetylated protein component of the large (60S) ribosomal subunit, nearly identical to Rpl1Ap and has similarity to E. coli L1 and rat L10a ribosomal proteins; rpl1a rpl1b double null mutation is lethal
YGL234W	K.DAPGCVIENGTK.L	ADE5	2.384	602.287	0.04	Bifunctional enzyme of the 'de novo' purine nucleotide biosynthetic pathway, contains aminoimidazole ribotide synthetase and glycinamide ribotide synthetase activities
YGL234W	R.TAVDTVYEAVK.C	ADE5	3.206	598.314	-0.11	Bifunctional enzyme of the 'de novo' purine nucleotide biosynthetic pathway, contains aminoimidazole ribotide synthetase and glycinamide ribotide synthetase activities
YGL245W	K.AYCDDTPTEK.M	GUS1	2.432	571.737	-0.96	Glutamyl-tRNA synthetase (GluRS), forms a complex with methionyl-tRNA synthetase (Mes1p) and Arc1p; complex formation increases the catalytic efficiency of both tRNA synthetases and ensures their correct localization to the cytoplasm
YGL253W	K.LSDDIPPSAPMAINCEYGSFDNEHVVLPR.T	HXK2	3.299	1068.16	-1.25	Hexokinase isoenzyme 2 that catalyzes phosphorylation of glucose in the cytosol; predominant hexokinase during growth on glucose; functions in the nucleus to repress expression of HXK1 and GLK1 and to induce expression of its own gene
YGR061C	K.TVPGFPLLENLNDISLK.C	ADE6	1.757	935.52	-0.11	Formylglycinamidine-ribonucleotide (FGAM)-synthetase, catalyzes a step in the 'de novo' purine nucleotide biosynthetic pathway
YGR094W	K.ESYPNGIPQCGTDAMR.F	VAS1	2.425	877.877	-0.01	Mitochondrial and cytoplasmic valyl-tRNA synthetase
YGR094W	K.NLYVGQEDNEMTIPTCSR.S	VAS1	4.343	1043.46	-0.2	Mitochondrial and cytoplasmic valyl-tRNA synthetase
YGR124W	K.ADWGCAEDPSGR.Y	ASN2	3.574	632.257	0.17	Asparagine synthetase, isozyme of Asn1p; catalyzes the synthesis of L-asparagine from L-aspartate in the asparagine biosynthetic pathway
YGR124W	R.SSQSPETVYFASELK.C	ASN2	4.177	836.907	0.46	Asparagine synthetase, isozyme of Asn1p; catalyzes the synthesis of L-asparagine from L-aspartate in the asparagine biosynthetic pathway
YGR159C	K.EIDGRPINCDMSTSKPAGNNDR.A	NSR1	3.631	797.366	-0.1	Nucleolar protein that binds nuclear localization sequences, required for pre-rRNA processing and ribosome biogenesis
YGR192C	K.IVSNASCTTNCLAPLAK.V	TDH3	5.194	853.434	-0.86	Glyceraldehyde-3-phosphate dehydrogenase, isozyme 3, involved in glycolysis and gluconeogenesis; tetramer that catalyzes the reaction of glyceraldehyde-3-phosphate to 1,3 bis-phosphoglycerate; detected in the cytoplasm and cell-wall
YGR240C	-.MQSQDSCYGVAFR.S	PFK1	4.082	754.319	-0.35	Alpha subunit of heterooctameric phosphofructokinase involved in glycolysis, indispensable for anaerobic growth, activated by fructose-2,6-bisphosphate and AMP, mutation inhibits glucose induction of cell cycle-related genes
YGR254W	K.IGLDCASSEFFK.D	ENO1	3.49	658.813	0.41	Enolase I, a phosphopyruvate hydratase that catalyzes the conversion of 2-phosphoglycerate to phosphoenolpyruvate during glycolysis and the reverse reaction during gluconeogenesis; expression is repressed in response to glucose
YGR279C	R.GITYTPYESSGACK.S	SCW4	3.148	738.837	-0.21	Cell wall protein with similarity to glucanases; scw4 scw10 double mutants exhibit defects in mating
YGR279C	R.LYGTDCNQVENVFK.A	SCW4	3.749	815.382	-0.98	Cell wall protein with similarity to glucanases; scw4 scw10 double mutants exhibit defects in mating
YHL001W	K.WAAAGVCEK.W	RPL14B	2.792	467.726	-0.16	Protein component of the large (60S) ribosomal subunit, nearly identical to Rpl14Ap and has similarity to rat L14 ribosomal protein
YHR003C	R.VSINDISMTEFDPISR.C	YHR003C	4.03	920.441	-2.38	Protein of unknown function, localized to the mitochondrial outer membrane
YHR019C	K.YGTCPHGGYGIGTER.I	DED81	3.349	784.351	-0.33	Cytosolic asparaginyl-tRNA synthetase, required for protein synthesis, catalyzes the specific attachment of asparagine to its cognate tRNA
YHR020W	K.FAGGDFTTTCEGYIPQTGR.G	YHR020W	4.069	1010.96	0.26	Protein of unknown function that may interact with ribosomes, based on co-purification experiments; has similarity to proline-tRNA ligase; YHR020W is an essential gene
YHR025W	K.YQWNPAIK.C	THR1	2.229	510.269	0.29	Homoserine kinase, conserved protein required for threonine biosynthesis; expression is regulated by the GCN4-mediated general amino acid control pathway
YHR068W	K.HGADCLEANQDVDSPIWTPSK.M	DYS1	4.179	761.683	-0.32	Deoxyhypusine synthase, catalyzes formation of deoxyhypusine, the first step in hypusine biosynthesis; triggers posttranslational hypusination of translation elongation factor eIF-5A and regulates its intracellular levels; tetrameric
YHR068W	K.KGCFDEEGYQK.T	DYS1	3.149	652.285	0.61	Deoxyhypusine synthase, catalyzes formation of deoxyhypusine, the first step in hypusine biosynthesis; triggers posttranslational hypusination of translation elongation factor eIF-5A and regulates its intracellular levels; tetrameric
YHR068W	K.MVDAVVTSAGGVEEDLIK.C	DYS1	4.013	924.966	-0.6	Deoxyhypusine synthase, catalyzes formation of deoxyhypusine, the first step in hypusine biosynthesis; triggers posttranslational hypusination of translation elongation factor eIF-5A and regulates its intracellular levels; tetrameric
YHR104W	R.LFDGACDYGNEK.E	GRE3	3.677	666.282	-0.2	Aldose reductase involved in methylglyoxal, d-xylose and arabinose metabolism; stress induced (osmotic, ionic, oxidative, heat shock, starvation and heavy metals); regulated by the HOG pathway
YHR183W	R.VLPECASDNLPVDK.D	GND1	2.713	750.374	-0.08	6-phosphogluconate dehydrogenase (decarboxylating), catalyzes an NADPH regenerating reaction in the pentose phosphate pathway; required for growth on D-glucono-delta-lactone and adaptation to oxidative stress
YHR203C	K.LSGCYAPRPSAGPHK.L	RPS4B	3.813	770.888	0.12	Protein component of the small (40S) ribosomal subunit; identical to Rps4Ap and has similarity to rat S4 ribosomal protein
YIL078W	K.VPDGGATTVYR.C	THS1	3.475	568.291	-0.39	Threonyl-tRNA synthetase, essential cytoplasmic protein
YIL116W	K.IYNLEPYR.C	HIS5	2.282	534.28	0.44	Histidinol-phosphate aminotransferase, catalyzes the seventh step in histidine biosynthesis; responsive to general control of amino acid biosynthesis; mutations cause histidine auxotrophy and sensitivity to Cu, Co, and Ni salts
YIL142W	K.LLQSASSNTCMVTNDGATILK.S	CCT2	4.533	1092.04	-0.37	Subunit beta of the cytosolic chaperonin Cct ring complex, related to Tcp1p, required for the assembly of actin and tubulins in vivo
YIR033W	K.SLNINSNISICDSLGR.T	MGA2	1.964	569.29	0.32	ER membrane protein involved in regulation of OLE1 transcription, acts with homolog Spt23p; inactive ER form dimerizes and one subunit is then activated by ubiquitin/proteasome-dependent processing followed by nuclear targeting
YJL080C	K.FACQIDIPNEENNNASK.D	SCP160	3.593	953.933	-0.54	Essential RNA-binding G protein effector of mating response pathway, mainly associated with nuclear envelope and ER, interacts in mRNA-dependent manner with translating ribosomes via multiple KH domains, similar to vertebrate vigilins
YJL080C	K.KLTKPINAVIEVPSK.C	SCP160	2.951	546.338	-0.45	Essential RNA-binding G protein effector of mating response pathway, mainly associated with nuclear envelope and ER, interacts in mRNA-dependent manner with translating ribosomes via multiple KH domains, similar to vertebrate vigilins
YJL080C	K.LTKPINAVIEVPSK.C	SCP160	3.075	503.64	0.17	Essential RNA-binding G protein effector of mating response pathway, mainly associated with nuclear envelope and ER, interacts in mRNA-dependent manner with translating ribosomes via multiple KH domains, similar to vertebrate vigilins
YJL121C	K.WVDDFAK.C	RPE1	2.371	440.714	0.02	D-ribulose-5-phosphate 3-epimerase, catalyzes a reaction in the non-oxidative part of the pentose-phosphate pathway; mutants are sensitive to oxidative stress
YJL130C	K.VLGTPIDTIITTEDRELFSNAIDEINEK.C	URA2	2.069	1049.54	-0.12	Bifunctional carbamoylphosphate synthetase (CPSase)-aspartate transcarbamylase (ATCase), catalyzes the first two enzymatic steps in the de novo biosynthesis of pyrimidines; both activities are subject to feedback inhibition by UTP
YJL167W	K.IGTDIQDNK.C	ERG20	2.96	502.256	0.21	Farnesyl pyrophosphate synthetase, has both dimethylallyltranstransferase and geranyltranstransferase activities; catalyzes the formation of C15 farnesyl pyrophosphate units for isoprenoid and sterol biosynthesis
YJL167W	K.TLDENYGKKDSVAEAK.C	ERG20	4.836	884.441	-0.8	Farnesyl pyrophosphate synthetase, has both dimethylallyltranstransferase and geranyltranstransferase activities; catalyzes the formation of C15 farnesyl pyrophosphate units for isoprenoid and sterol biosynthesis
YJR016C	K.LAECDNIGEYIK.K	ILV3	4.165	684.328	-1.43	Dihydroxyacid dehydratase, catalyzes third step in the common pathway leading to biosynthesis of branched-chain amino acids
YJR064W	K.DFSHPQMPK.C	CCT5	2.042	543.755	0.04	Subunit of the cytosolic chaperonin Cct ring complex, related to Tcp1p, required for the assembly of actin and tubulins in vivo
YJR105W	K.CAALITGHNR.S	ADO1	2.321	528.274	-0.46	Adenosine kinase, required for the utilization of S-adenosylmethionine (AdoMet); may be involved in recycling adenosine produced through the methyl cycle
YJR105W	K.SMYQVQNDIGTGK.C	ADO1	4.41	728.84	-0.49	Adenosine kinase, required for the utilization of S-adenosylmethionine (AdoMet); may be involved in recycling adenosine produced through the methyl cycle
YJR109C	K.LYDNGCNIMGTNPNDIDRAENR.H	CPA2	2.877	832.372	-0.4	Large subunit of carbamoyl phosphate synthetase, which catalyzes a step in the synthesis of citrulline, an arginine precursor
YJR123W	K.AQCPIIER.L	RPS5	1.98	465.247	0.1	Protein component of the small (40S) ribosomal subunit, the least basic of the non-acidic ribosomal proteins; phosphorylated in vivo; essential for viability; has similarity to E. coli S7 and rat S5 ribosomal proteins
YKL035W	K.LNGGLGTSMGCVGPK.S	UGP1	3.971	703.842	0.24	UDP-glucose pyrophosphorylase (UGPase), catalyses the reversible formation of UDP-Glc from glucose 1-phosphate and UTP, involved in a wide variety of metabolic pathways, expression modulated by Pho85p through Pho4p
YKL060C	K.VNLDTDCQYAYLTGIR.D	FBA1	5.557	922.945	-0.96	Fructose 1,6-bisphosphate aldolase, required for glycolysis and gluconeogenesis; catalyzes conversion of fructose 1,6 bisphosphate to glyceraldehyde-3-P and dihydroxyacetone-P; locates to mitochondrial outer surface upon oxidative stress
YKL060C	R.SIAPAYGIPVVLHSDHCAK.K	FBA1	4.26	989.514	-0.05	Fructose 1,6-bisphosphate aldolase, required for glycolysis and gluconeogenesis; catalyzes conversion of fructose 1,6 bisphosphate to glyceraldehyde-3-P and dihydroxyacetone-P; locates to mitochondrial outer surface upon oxidative stress
YKL081W	K.DVDACFVK.I	TEF4	2.3	448.713	-0.01	Translation elongation factor EF-1 gamma
YKL085W	K.IHPIGELSSEEEEMLQK.C	MDH1	4.527	656.991	-0.34	Mitochondrial malate dehydrogenase, catalyzes interconversion of malate and oxaloacetate; involved in the tricarboxylic acid (TCA) cycle; phosphorylated
YKL182W	K.EVYDFTHAVGNNCEDFVSRPDR.T	FAS1	4.207	857.384	0.36	Beta subunit of fatty acid synthetase, which catalyzes the synthesis of long-chain saturated fatty acids; contains acetyltransacylase, dehydratase, enoyl reductase, malonyl transacylase, and palmitoyl transacylase activities
YKL182W	K.NANIFSSVK.C	FAS1	2.498	490.264	-0.32	Beta subunit of fatty acid synthetase, which catalyzes the synthesis of long-chain saturated fatty acids; contains acetyltransacylase, dehydratase, enoyl reductase, malonyl transacylase, and palmitoyl transacylase activities
YLL026W	K.SNPCLIGEPGIGK.T	HSP104	3.768	642.835	0.21	Heat shock protein that cooperates with Ydj1p (Hsp40) and Ssa1p (Hsp70) to refold and reactivate previously denatured, aggregated proteins; responsive to stresses including: heat, ethanol, and sodium arsenite; involved in [PSI+] propagation
YLR022C	K.GLVANKEDLQK.C	SDO1	3.115	607.841	-0.03	Essential protein involved in 60S ribosome maturation; ortholog of the human protein (SBDS) responsible for autosomal recessive Shwachman-Bodian-Diamond Syndrome; highly conserved across archae and eukaryotes
YLR028C	K.YTQSNSVCYAK.N	ADE16	3.295	632.287	0.19	Enzyme of 'de novo' purine biosynthesis containing both 5-aminoimidazole-4-carboxamide ribonucleotide transformylase and inosine monophosphate cyclohydrolase activities, isozyme of Ade17p; ade16 ade17 mutants require adenine and histidine
YLR029C	R.YNWICDPVHK.H	RPL15A	2.796	425.538	-0.19	Protein component of the large (60S) ribosomal subunit, nearly identical to Rpl15Bp and has similarity to rat L15 ribosomal protein; binds to 5.8 S rRNA
YLR044C	K.NPVILADACCSR.H	PDC1	3.297	631.305	-0.67	Major of three pyruvate decarboxylase isozymes, key enzyme in alcoholic fermentation, decarboxylates pyruvate to acetaldehyde; subject to glucose-, ethanol-, and autoregulation; involved in amino acid catabolism
YLR044C	R.MSANISETTAMITDIATAPAEIDR.C	PDC1	4.486	852.072	0.06	Major of three pyruvate decarboxylase isozymes, key enzyme in alcoholic fermentation, decarboxylates pyruvate to acetaldehyde; subject to glucose-, ethanol-, and autoregulation; involved in amino acid catabolism
YLR058C	R.MEILCQQR.A	SHM2	2.381	510.752	-0.26	Cytosolic serine hydroxymethyltransferase, converts serine to glycine plus 5,10 methylenetetrahydrofolate; major isoform involved in generating precursors for purine, pyrimidine, amino acid, and lipid biosynthesis
YLR058C	R.VEYICEK.I	SHM2	2.03	442.215	-0.11	Cytosolic serine hydroxymethyltransferase, converts serine to glycine plus 5,10 methylenetetrahydrofolate; major isoform involved in generating precursors for purine, pyrimidine, amino acid, and lipid biosynthesis
YLR058C	R.YYGGNEHIDRMEILCQQR.A	SHM2	3.624	742.346	0.39	Cytosolic serine hydroxymethyltransferase, converts serine to glycine plus 5,10 methylenetetrahydrofolate; major isoform involved in generating precursors for purine, pyrimidine, amino acid, and lipid biosynthesis
YLR060W	R.VCSLPPLINSEHSK.I	FRS1	2.678	508.601	-0.06	Beta subunit of cytoplasmic phenylalanyl-tRNA synthetase, forms a tetramer with Frs2p to generate active enzyme; sequence is evolutionarily distant from mitochondrial phenylalanyl-tRNA synthetase (Msf1p), but substrate binding is similar
YLR060W	R.YCDEPFTVEPVEIVSEHNGQSR.L	FRS1	2.958	845.719	-1.01	Beta subunit of cytoplasmic phenylalanyl-tRNA synthetase, forms a tetramer with Frs2p to generate active enzyme; sequence is evolutionarily distant from mitochondrial phenylalanyl-tRNA synthetase (Msf1p), but substrate binding is similar
YLR075W	K.MLSCAGADR.L	RPL10	2.643	462.207	0.24	Protein component of the large (60S) ribosomal subunit, responsible for joining the 40S and 60S subunits; regulates translation initiation; has similarity to rat L10 ribosomal protein and to members of the QM gene family
YLR075W	K.MLSCAGADRLQQGMR.G	RPL10	1.271	826.886	-0.83	Protein component of the large (60S) ribosomal subunit, responsible for joining the 40S and 60S subunits; regulates translation initiation; has similarity to rat L10 ribosomal protein and to members of the QM gene family
YLR109W	K.FASDPGCAFTK.S	AHP1	3.245	572.26	-0.24	Thiol-specific peroxiredoxin, reduces hydroperoxides to protect against oxidative damage; function in vivo requires covalent conjugation to Urm1p
YLR109W	K.FQYIAISQSDADSESCK.M	AHP1	5.42	946.422	-0.51	Thiol-specific peroxiredoxin, reduces hydroperoxides to protect against oxidative damage; function in vivo requires covalent conjugation to Urm1p
YLR109W	K.FQYIAISQSDADSESCKMPQTVEWSK.L	AHP1	3.286	998.787	-1.13	Thiol-specific peroxiredoxin, reduces hydroperoxides to protect against oxidative damage; function in vivo requires covalent conjugation to Urm1p
YLR197W	R.QLYDYLCEK.M	SIK1	2.572	587.776	0.14	Essential evolutionarily-conserved nucleolar protein component of the box C/D snoRNP complexes that direct 2'-O-methylation of pre-rRNA during its maturation; overexpression causes spindle orientation defects
YLR216C	R.LIENQQCDQENNKPLRDVK.I	CPR6	3.769	762.05	-0.33	Peptidyl-prolyl cis-trans isomerase (cyclophilin), catalyzes the cis-trans isomerization of peptide bonds N-terminal to proline residues; binds to Hsp82p and contributes to chaperone activity
YLR249W	K.EIEEHCSMLGLDPEIVSHSR.I	YEF3	4.81	766.355	-1.23	Translational elongation factor 3, stimulates the binding of aminoacyl-tRNA (AA-tRNA) to ribosomes by releasing EF-1 alpha from the ribosomal complex; contains two ABC cassettes; binds and hydrolyses ATP
YLR249W	K.SAVIIDNMCK.L	YEF3	2.141	555.27	-0.31	Translational elongation factor 3, stimulates the binding of aminoacyl-tRNA (AA-tRNA) to ribosomes by releasing EF-1 alpha from the ribosomal complex; contains two ABC cassettes; binds and hydrolyses ATP
YLR249W	R.AIANGQVDGFPTQEECR.T	YEF3	5.235	917.924	0.73	Translational elongation factor 3, stimulates the binding of aminoacyl-tRNA (AA-tRNA) to ribosomes by releasing EF-1 alpha from the ribosomal complex; contains two ABC cassettes; binds and hydrolyses ATP
YLR249W	R.KEIEEHCSMLGLDPEIVSHSR.I	YEF3	4.503	803.722	-1.39	Translational elongation factor 3, stimulates the binding of aminoacyl-tRNA (AA-tRNA) to ribosomes by releasing EF-1 alpha from the ribosomal complex; contains two ABC cassettes; binds and hydrolyses ATP
YLR300W	R.KYPNQCGTISN.-	EXG1	2.836	612.788	0.98	Major exo-1,3-beta-glucanase of the cell wall, involved in cell wall beta-glucan assembly; exists as three differentially glycosylated isoenzymes
YLR301W	K.NWDSGCVEETGAVYPFGADK.E	YLR301W	5.323	1072.97	0.43	Protein of unknown function that interacts with Sec72p
YLR304C	R.VGLIGSCTNSSYEDMSR.S	ACO1	4.771	909.903	-0.75	Aconitase, required for the tricarboxylic acid (TCA) cycle and also independently required for mitochondrial genome maintenance; phosphorylated; component of the mitochondrial nucleoid; mutation leads to glutamate auxotrophy
YLR314C	K.FMQSVYEK.C	CDC3	2.227	516.247	-0.41	Component of the septin ring of the mother-bud neck that is required for cytokinesis; septins recruit proteins to the neck and can act as a barrier to diffusion at the membrane, and they comprise the 10nm filaments seen with EM
YLR355C	K.YGMDYMYDACSTTAR.R	ILV5	3.865	890.338	1.83	Acetohydroxyacid reductoisomerase, mitochondrial protein involved in branched-chain amino acid biosynthesis, also required for maintenance of wild-type mitochondrial DNA and found in mitochondrial nucleoids
YLR388W	K.YGLNICR.Q	RPS29A	2.78	419.716	-0.24	Protein component of the small (40S) ribosomal subunit; nearly identical to Rps29Bp and has similarity to rat S29 and E. coli S14 ribosomal proteins
YLR388W	R.KYGLNICR.Q	RPS29A	2.258	322.844	-0.4	Protein component of the small (40S) ribosomal subunit; nearly identical to Rps29Bp and has similarity to rat S29 and E. coli S14 ribosomal proteins
YLR420W	K.IILEHCTSESAIK.T	URA4	1.62	481.922	0.4	Dihydroorotase, catalyzes the third enzymatic step in the de novo biosynthesis of pyrimidines, converting carbamoyl-L-aspartate into dihydroorotate
YML008C	R.FTGCNVIGLNNNDYQIAK.A	ERG6	5.144	992.483	-0.33	Delta(24)-sterol C-methyltransferase, converts zymosterol to fecosterol in the ergosterol biosynthetic pathway by methylating position C-24; localized to both lipid particles and mitochondrial outer membrane
YML028W	K.NGTVLPCNWTPGAATIKPTVEDSK.E	TSA1	4.104	1250.13	0.9	Thioredoxin peroxidase, acts as both a ribosome-associated and free cytoplasmic antioxidant; self-associates to form a high-molecular weight chaperone complex under oxidative stress; deletion results in mutator phenotype
YML072C	K.ANNDGVAVFDEECSFK.A	TCB3	4.07	872.878	0.36	Lipid-binding protein, localized to the bud via specific mRNA transport; non-tagged protein detected in a phosphorylated state in mitochondria; GFP-fusion protein localizes to the cell periphery; C-termini of Tcb1p, Tcb2p and Tcb3p interact
YML126C	K.YFDYNVFHVPTCK.L	ERG13	2.12	544.922	-0.05	3-hydroxy-3-methylglutaryl-CoA (HMG-CoA) synthase, catalyzes the formation of HMG-CoA from acetyl-CoA and acetoacetyl-CoA; involved in the second step in mevalonate biosynthesis
YMR092C	R.NFTTHLSYDPTTNAIAYPCGK.S	AIP1	2.953	772.032	0.25	Actin cortical patch component, interacts with the actin depolymerizing factor cofilin; required to restrict cofilin localization to cortical patches; contains WD repeats
YMR120C	K.YTQSNSVCYAR.N	ADE17	3.619	646.291	0.15	Enzyme of 'de novo' purine biosynthesis containing both 5-aminoimidazole-4-carboxamide ribonucleotide transformylase and inosine monophosphate cyclohydrolase activities, isozyme of Ade16p; ade16 ade17 mutants require adenine and histidine
YMR189W	K.TFSIPHGGGGPAGAPICVK.S	GCV2	1.884	589.306	-0.75	P subunit of the mitochondrial glycine decarboxylase complex, required for the catabolism of glycine to 5,10-methylene-THF; expression is regulated by levels of 5,10-methylene-THF in the cytoplasm
YMR200W	R.QLFSDPCNDDGVSTYSR.Y	ROT1	4.051	952.409	-1.32	Essential ER membrane protein; may be involved in protein folding; mutation causes defects in cell wall synthesis and in lysis of autophagic bodies, suppresses tor2 mutations, and is synthetically lethal with kar2-1 and with rot2 mutations
YMR205C	R.GWSAEGGTNIGTAR.C	PFK2	4.056	688.831	-0.46	Beta subunit of heterooctameric phosphofructokinase involved in glycolysis, indispensable for anaerobic growth, activated by fructose-2,6-bisphosphate and AMP, mutation inhibits glucose induction of cell cycle-related genes
YMR215W	K.ESEISSDSIYK.C	GAS3	3.277	629.296	-0.52	Putative 1,3-beta-glucanosyltransferase, has similarity to Gas1p; localizes to the cell wall
YMR215W	R.IYSLNPDLNHDK.C	GAS3	3.821	714.859	-0.69	Putative 1,3-beta-glucanosyltransferase, has similarity to Gas1p; localizes to the cell wall
YMR217W	K.NFAVDLCHAK.Q	GUA1	3.07	559.276	-1.11	GMP synthase, an enzyme that catalyzes the second step in the biosynthesis of GMP from inosine 5'-phosphate (IMP); transcription is not subject to regulation by guanine but is negatively regulated by nutrient starvation
YMR222C	K.VQGLYNSCTEDSR.T	FSH2	2.929	736.328	0.07	Serine hydrolase that localizes to the cytoplasm; sequence is similar to Fsh1p and Fsh3p
YMR260C	R.VEASCFDGNK.R	TIF11	2.817	535.234	-0.67	Translation initiation factor eIF1A, essential protein that forms a complex with Sui1p (eIF1) and the 40S ribosomal subunit and scans for the start codon; C-terminus associates with Fun12p (eIF5B); N terminus interacts with eIF2 and eIF3
YMR261C	R.VCSPSQEASASSISASR.S	TPS3	4.184	833.888	-0.33	Regulatory subunit of trehalose-6-phosphate synthase/phosphatase complex, which synthesizes the storage carbohydrate trehalose; expression is induced by stress conditions and repressed by the Ras-cAMP pathway
YMR290C	K.QNNAAPEGEQTTCVEK.F	HAS1	3.306	859.886	-0.33	ATP-dependent RNA helicase; localizes to both the nuclear periphery and nucleolus; highly enriched in nuclear pore complex fractions; constituent of 66S pre-ribosomal particles
YMR300C	R.GQDAAGIATCGSR.G	ADE4	3.844	603.78	-0.02	Phosphoribosylpyrophosphate amidotransferase (PRPPAT; amidophosphoribosyltransferase), catalyzes first step of the 'de novo' purine nucleotide biosynthetic pathway
YMR307W	K.YGAYSFCTPK.E	GAS1	2.464	568.758	1.11	Beta-1,3-glucanosyltransferase, required for cell wall assembly; localizes to the cell surface via a glycosylphosphatidylinositol (GPI) anchor
YNL055C	R.GAFDLCLK.S	POR1	2.045	433.726	-0.19	Mitochondrial porin (voltage-dependent anion channel), outer membrane protein required for the maintenance of mitochondrial osmotic stability and mitochondrial membrane permeability; phosphorylated
YNL104C	R.YAVENAPDDVSIQCLVQSR.E	LEU4	3.336	1054.01	0.6	Alpha-isopropylmalate synthase (2-isopropylmalate synthase); the main isozyme responsible for the first step in the leucine biosynthesis pathway
YNL134C	K.IGPQGALLGCDAAGQIVK.L	YNL134C	3.731	855.965	1.45	Putative protein of unknown function with similarity to dehydrogenases from other model organisms; green fluorescent protein (GFP)-fusion protein localizes to both the cytoplasm and nucleus and is induced by the DNA-damaging agent MMS
YNL135C	R.GSPFQCNIGVGQVIK.G	FPR1	4.069	773.906	0.2	Peptidyl-prolyl cis-trans isomerase (PPIase), binds to the drugs FK506 and rapamycin; also binds to the nonhistone chromatin binding protein Hmo1p and may regulate its assembly or function
YNL138W	K.NNKPSDSGADANTTNEPSAENAPEVEQDPK.C	SRV2	4.98	1042.8	-0.38	CAP (cyclase-associated protein) subunit of adenylyl cyclase complex; N-terminus binds adenylyl cyclase and facilitates activation by RAS; C-terminus binds ADP-actin monomers, facilitating regulation of actin dynamics and cell morphogenesis
YNL157W	R.ISTCPSTASTAGVVDNATLIQK.E	YNL157W	3.117	1089.06	-1.23	Hypothetical protein
YNL241C	K.SEDGSKPAYVDDDTVDKDSK.C	ZWF1	5.708	724.325	-0.68	Glucose-6-phosphate dehydrogenase (G6PD), catalyzes the first step of the pentose phosphate pathway; involved in adapting to oxidatve stress; homolog of the human G6PD which is deficient in patients with hemolytic anemia
YNL244C	K.DFACNGNIVKDPEMGEIIQLQGDQR.A	SUI1	4.815	936.108	-1.11	Translation initiation factor eIF1; component of a complex involved in recognition of the initiator codon; modulates translation accuracy at the initiation phase
YNL301C	K.AGGECITLDQLAVR.A	RPL18B	4.711	723.375	0.59	Protein component of the large (60S) ribosomal subunit, identical to Rpl18Ap and has similarity to rat L18 ribosomal protein
YNR016C	K.TIIGSEDGLGVECLR.G	ACC1	3.886	781.398	-0.7	Acetyl-CoA carboxylase, biotin containing enzyme that catalyzes the carboxylation of acetyl-CoA to form malonyl-CoA; required for de novo biosynthesis of long-chain fatty acids
YNR046W	K.ACDTSNDNFPLQYDGSK.C	TRM112	3.622	937.897	0.36	Subunit of an adoMet-dependent tRNA methyltransferase (MTase) complex (Trm11p-Trm112p), required for the methylation of the guanosine nucleotide at position 10 (m2G10) in tRNAs; putative zinc binding subunit of other MTase-related proteins
YNR046W	K.FLTTNFLK.C	TRM112	1.975	492.282	0.38	Subunit of an adoMet-dependent tRNA methyltransferase (MTase) complex (Trm11p-Trm112p), required for the methylation of the guanosine nucleotide at position 10 (m2G10) in tRNAs; putative zinc binding subunit of other MTase-related proteins
YOL038W	K.NYDRKEPPATVEECVK.L	PRE6	3.57	939.457	0.03	Alpha 4 subunit of the 20S proteasome; may replace alpha 3 subunit (Pre9p) under stress conditions to create a more active proteasomal isoform; GFP-fusion protein relocates from cytosol to the mitochondrial surface upon oxidative stress
YOL086C	R.ANGTTVLVGMPAGAK.C	ADH1	3.57	701.871	-0.15	Alcohol dehydrogenase, fermentative isozyme active as homo- or heterotetramers; required for the reduction of acetaldehyde to ethanol, the last step in the glycolytic pathway
YOR027W	K.FSDALNDANECVK.I	STI1	4.873	713.319	-0.43	Hsp90 cochaperone, interacts with the Ssa group of the cytosolic Hsp70 chaperones; activates the ATPase activity of Ssa1p; homolog of mammalian Hop protein
YOR027W	K.LMSFPEAIADCNK.A	STI1	3.493	727.836	-0.36	Hsp90 cochaperone, interacts with the Ssa group of the cytosolic Hsp70 chaperones; activates the ATPase activity of Ssa1p; homolog of mammalian Hop protein
YOR046C	R.VNPEDASPQAICLAPSR.E	DBP5	3.727	884.438	0.03	Cytoplasmic ATP-dependent RNA helicase of the DEAD-box family involved in mRNA export from the nucleus; involved in translation termination
YOR086C	K.YYINNEEDCAYK.T	TCB1	3.183	762.819	0.09	Lipid-binding protein containing three calcium and lipid binding domains; non-tagged protein localizes to mitochondria and GFP-fusion protein localizes to the cell periphery; C-termini of Tcb1p, Tcb2p and Tcb3p interact
YOR142W	R.LVGPNCPGIINPATK.V	LSC1	3.311	747.411	-0.03	Alpha subunit of succinyl-CoA ligase, which is a mitochondrial enzyme of the TCA cycle that catalyzes the nucleotide-dependent conversion of succinyl-CoA to succinate; phosphorylated
YOR184W	K.ILYEALDANSDFYNVPVDPK.C	SER1	4.922	1142.06	-1.52	3-phosphoserine aminotransferase, catalyzes the formation of phosphoserine from 3-phosphohydroxypyruvate, required for serine and glycine biosynthesis; regulated by the general control of amino acid biosynthesis mediated by Gcn4p
YOR204W	R.DLMACAQTGSGK.T	DED1	3.579	591.268	-0.02	ATP-dependent DEAD (Asp-Glu-Ala-Asp)-box RNA helicase, required for translation initiation of all yeast mRNAs; mutations in human DEAD-box DBY are a frequent cause of male infertility
YOR204W	R.HIVEDCDMTPVGER.Q	DED1	4.038	808.856	0.15	ATP-dependent DEAD (Asp-Glu-Ala-Asp)-box RNA helicase, required for translation initiation of all yeast mRNAs; mutations in human DEAD-box DBY are a frequent cause of male infertility
YOR209C	K.IICYSDSLNVEK.A	NPT1	3.517	692.345	0.48	Nicotinate phosphoribosyltransferase, acts in the salvage pathway of NAD+ biosynthesis; required for silencing at rDNA and telomeres and has a role in silencing at mating-type loci; localized to the nucleus
YOR224C	R.IEAASTTQDQCK.L	RPB8	2.725	647.801	0.23	RNA polymerase subunit ABC14.5, common to RNA polymerases I, II, and III
YOR272W	K.TWDLVTAR.C	YTM1	2.439	481.259	-0.3	Constituent of 66S pre-ribosomal particles, required for maturation of the large ribosomal subunit
YOR276W	K.VTTDSDGWCTFEAK.K	CAF20	3.406	780.338	0.62	Phosphoprotein of the mRNA cap-binding complex involved in translational control, repressor of cap-dependent translation initiation, competes with eIF4G for binding to eIF4E
YOR323C	K.LTEAIQCK.T	PRO2	2.147	453.242	0.38	Gamma-glutamyl phosphate reductase, catalyzes the second step in proline biosynthesis
YOR323C	K.TNYPAGCNAMETLLINPK.F	PRO2	4.16	983.474	-0.17	Gamma-glutamyl phosphate reductase, catalyzes the second step in proline biosynthesis
YOR335C	K.KVEDICNEQIK.E	ALA1	2.977	440.227	0.49	Cytoplasmic alanyl-tRNA synthetase, required for protein synthesis; point mutation (cdc64-1 allele) causes cell cycle arrest at G1; lethality of null mutation is functionally complemented by human homolog
YOR375C	K.VDIALPCATQNEVSGEEAK.A	GDH1	4.457	987.476	-1.41	NADP(+)-dependent glutamate dehydrogenase, synthesizes glutamate from ammonia and alpha-ketoglutarate; rate of alpha-ketoglutarate utilization differs from Gdh3p; expression regulated by nitrogen and carbon sources
YPL028W	K.AIILGAQSIK.C	ERG10	2.551	507.321	-0.14	Acetyl-CoA C-acetyltransferase (acetoacetyl-CoA thiolase), cytosolic enzyme that transfers an acetyl group from one acetyl-CoA molecule to another, forming acetoacetyl-CoA; involved in the first step in mevalonate biosynthesis
YPL028W	K.FGQTVLVDGVERDGLNDAYDGLAMGVHAEK.C	ERG10	2.782	798.887	-0.65	Acetyl-CoA C-acetyltransferase (acetoacetyl-CoA thiolase), cytosolic enzyme that transfers an acetyl group from one acetyl-CoA molecule to another, forming acetoacetyl-CoA; involved in the first step in mevalonate biosynthesis
YPL061W	K.NAGQICSSGSR.I	ALD6	3.405	540.249	0.37	Cytosolic aldehyde dehydrogenase, activated by Mg2+ and utilizes NADP+ as the preferred coenzyme; required for conversion of acetaldehyde to acetate; constitutively expressed; locates to the mitochondrial outer surface upon oxidative stress
YPL061W	R.GDVTIAINCLR.D	ALD6	3.065	587.816	0.26	Cytosolic aldehyde dehydrogenase, activated by Mg2+ and utilizes NADP+ as the preferred coenzyme; required for conversion of acetaldehyde to acetate; constitutively expressed; locates to the mitochondrial outer surface upon oxidative stress
YPL106C	K.VLGTACDK.H	SSE1	2.438	403.707	-0.02	ATPase that is a component of the heat shock protein Hsp90 chaperone complex; binds unfolded proteins; member of the heat shock protein 70 (HSP70) family; localized to the cytoplasm
YPL117C	R.SSETSNDESGETCFSGHDEEQIK.L	IDI1	4.285	839.339	0.61	Isopentenyl diphosphate:dimethylallyl diphosphate isomerase (IPP isomerase), catalyzes an essential activation step in the isoprenoid biosynthetic pathway; required for viability
YPL126W	R.SVNNSQGCLTADNNGGLK.F	NAN1	3.524	896.418	-0.08	U3 snoRNP protein, component of the small (ribosomal) subunit (SSU) processosome containing U3 snoRNA; required for the biogenesis of18S rRNA
YPL160W	K.GTGVVTCVPSNSPDDYITTK.D	CDC60	3.171	1027.49	-0.41	Cytosolic leucyl tRNA synthetase, ligates leucine to the appropriate tRNA
YPL231W	K.TLGEQLIENCK.Q	FAS2	3.415	624.319	0.34	Alpha subunit of fatty acid synthetase, which catalyzes the synthesis of long-chain saturated fatty acids; contains beta-ketoacyl reductase and beta-ketoacyl synthase activities; phosphorylated
YPR004C	R.ASVDNGLCDNSLQIGQTGK.V	YPR004C	4.475	960.46	-0.14	Protein with similarity to mammalian electron transfer flavoprotein complex subunit ETF-alpha; interacts with yeast frataxin Yfh1p; null mutant displays increased frequency of mitochondrial genome loss (petite formation)
YPR035W	K.GGYPAPQGPYYCGVGAGK.V	GLN1	3.982	871.403	-0.64	Glutamine synthetase (GS), synthesizes glutamine from glutamate and ammonia; with Glt1p, forms the secondary pathway for glutamate biosynthesis from ammonia; expression regulated by nitrogen source and by amino acid limitation

## Sheet: Expt. 3
Table S1(C). Peptides containing cysteine identified from the third experiment without the enrichment and reduction/alkylation
Reference	Peptide	Gene symbol	XCorr	Obs m/z	PPM	Annotation
R0040C	R.TAYSVWDVCR.L	REP2	2.006	600.279	-0.43	Master regulator that acts in concert with Rep1p to regulate transcript levels of the FLP1 gene that promotes plasmid copy amplification; also autoregulates levels of its own transcript
YAL023C	K.NQALGGSLLHSHIQTYPDGSNQQQVTCYGYK.D	PMT2	2.987	852.657	-0.01	Protein O-mannosyltransferase, transfers mannose residues from dolichyl phosphate-D-mannose to protein serine/threonine residues; acts in a complex with Pmt1p, can instead interact with Pmt5p in some conditions; target for new antifungals
YAL038W	K.YRPNCPIILVTR.C	CDC19	3.159	482.275	0.37	Pyruvate kinase, functions as a homotetramer in glycolysis to convert phosphoenolpyruvate to pyruvate, the input for aerobic (TCA cycle) or anaerobic (glucose fermentation) respiration
YAL038W	R.AEVSDVGNAILDGADCVMLSGETAK.G	CDC19	4.26	1241.08	-1.5	Pyruvate kinase, functions as a homotetramer in glycolysis to convert phosphoenolpyruvate to pyruvate, the input for aerobic (TCA cycle) or anaerobic (glucose fermentation) respiration
YAR007C	K.VLEQPDGTWR.C	RFA1	2.408	600.804	0.59	Subunit of heterotrimeric Replication Protein A (RPA), which is a highly conserved single-stranded DNA binding protein involved in DNA replication, repair, and recombination
YAR010C	K.EVHTNQDPLDVSASKTEECEK.A	YAR010C	3.7	787.029	-0.24	Retrotransposon TYA Gag gene co-transcribed with TYB Pol; in YARCTY1-1 TYB is mutant and probably non-functional
YBL017C	K.NYFLAK.C	PEP1	1.466	378.208	0.09	Type I transmembrane sorting receptor for multiple vacuolar hydrolases; cycles between the late-Golgi and prevacuolar endosome-like compartments
YBL030C	K.YAGILDCFKR.T	PET9	2.146	395.874	-0.32	Major ADP/ATP carrier of the mitochondrial inner membrane, exchanges cytosolic ADP for mitochondrially synthesized ATP; phosphorylated; required for viability in many common lab strains carrying a mutation in the polymorphic SAL1 gene
YBL050W	K.AGNEDEAGNTYVEAYK.C	SEC17	4.913	865.878	-0.86	Peripheral membrane protein required for vesicular transport between ER and Golgi and for the 'priming' step in homotypic vacuole fusion, part of the cis-SNARE complex; has similarity to alpha-SNAP
YBL050W	K.KAGNEDEAGNTYVEAYK.C	SEC17	2.661	620.286	-0.26	Peripheral membrane protein required for vesicular transport between ER and Golgi and for the 'priming' step in homotypic vacuole fusion, part of the cis-SNARE complex; has similarity to alpha-SNAP
YBL050W	K.SLIDAVNEGDSEQLSEHCK.E	SEC17	3.368	1037.47	-0.56	Peripheral membrane protein required for vesicular transport between ER and Golgi and for the 'priming' step in homotypic vacuole fusion, part of the cis-SNARE complex; has similarity to alpha-SNAP
YBL076C	K.LGITGKDDVFKYGLENYNNECR.S	ILS1	3.922	850.076	-0.46	Cytoplasmic isoleucine-tRNA synthetase, target of the G1-specific inhibitor reveromycin A
YBL076C	K.YGLENYNNECR.S	ILS1	3.471	687.791	-0.17	Cytoplasmic isoleucine-tRNA synthetase, target of the G1-specific inhibitor reveromycin A
YBL076C	R.VISDDYVTSDSGTGIVHNAPAFGEEDNAACLK.N	ILS1	4.715	1099.17	-0.46	Cytoplasmic isoleucine-tRNA synthetase, target of the G1-specific inhibitor reveromycin A
YBL087C	R.ISLGLPVGAIMNCADNSGAR.N	RPL23A	2.393	987.989	-1.08	Protein component of the large (60S) ribosomal subunit, identical to Rpl23Bp and has similarity to E. coli L14 and rat L23 ribosomal proteins
YBR025C	K.STFFQAITR.C	OLA1	3.096	535.785	0.8	P-loop ATPase with similarity to human OLA1 and bacterial YchF; identified as specifically interacting with the proteasome; protein levels are induced by hydrogen peroxide
YBR031W	R.SGQGAFGNMCR.G	RPL4A	3.201	572.237	-0.35	N-terminally acetylated protein component of the large (60S) ribosomal subunit, nearly identical to Rpl4Bp and has similarity to E. coli L4 and rat L4 ribosomal proteins
YBR078W	K.KLQSNGAIQGDSFVCK.N	ECM33	5.162	847.929	-0.92	GPI-anchored protein of unknown function, has a possible role in apical bud growth; GPI-anchoring on the plasma membrane crucial to function; phosphorylated in mitochondria; similar to Sps2p and Pst1p
YBR118W	K.FVPSKPMCVEAFSEYPPLGR.F	TEF2	2.91	757.371	0.09	Translational elongation factor EF-1 alpha; also encoded by TEF1; functions in the binding reaction of aminoacyl-tRNA (AA-tRNA) to ribosomes
YBR118W	R.GNVCGDAKNDPPK.G	TEF2	1.908	657.809	-0.02	Translational elongation factor EF-1 alpha; also encoded by TEF1; functions in the binding reaction of aminoacyl-tRNA (AA-tRNA) to ribosomes
YBR130C	K.NSSAIEQSCSEK.L	SHE3	3.763	641.783	0.69	Protein that acts as an adaptor between Myo4p and the She2p-mRNA complex; part of the mRNA localization machinery that restricts accumulation of certain proteins to the bud; also required for cortical ER inheritance
YBR151W	K.TLNCAVSSLPK.D	APD1	3.648	566.805	-0.94	Protein of unknown function, required for normal localization of actin patches and for normal tolerance of sodium ions and hydrogen peroxide; localizes to both cytoplasm and nucleus
YBR218C	R.LDGGNAYAGATISPHYDSMLVK.C	PYC2	2.726	766.036	0.51	Pyruvate carboxylase isoform, cytoplasmic enzyme that converts pyruvate to oxaloacetate; highly similar to isoform Pyc1p but differentially regulated; mutations in the human homolog are associated with lactic acidosis
YBR282W	R.VQSEGATDTSCYK.E	MRPL27	3.123	694.803	-0.6	Mitochondrial ribosomal protein of the large subunit
YBR286W	K.LVEIPNLGCEEK.D	APE3	3.042	672.347	-0.38	Vacuolar aminopeptidase Y, processed to mature form by Prb1p
YCL030C	K.FHAAQLPTETLEVETQPGVLCSR.F	HIS4	2.867	842.761	0.66	Multifunctional enzyme containing phosphoribosyl-ATP pyrophosphatase, phosphoribosyl-AMP cyclohydrolase, and histidinol dehydrogenase activities; catalyzes the second, third, ninth and tenth steps in histidine biosynthesis
YCL030C	K.LLQISTDCDSDALK.F	HIS4	3.744	761.376	-1.54	Multifunctional enzyme containing phosphoribosyl-ATP pyrophosphatase, phosphoribosyl-AMP cyclohydrolase, and histidinol dehydrogenase activities; catalyzes the second, third, ninth and tenth steps in histidine biosynthesis
YCL030C	K.LVDNAGSVFVGAYTPESCGDYSSGTNHTLPTYGYAR.Q	HIS4	2.721	1257.24	-0.08	Multifunctional enzyme containing phosphoribosyl-ATP pyrophosphatase, phosphoribosyl-AMP cyclohydrolase, and histidinol dehydrogenase activities; catalyzes the second, third, ninth and tenth steps in histidine biosynthesis
YCR012W	K.DVTFLNDCVGPEVEAAVK.A	PGK1	4.944	953.466	-1.17	3-phosphoglycerate kinase, catalyzes transfer of high-energy phosphoryl groups from the acyl phosphate of 1,3-bisphosphoglycerate to ADP to produce ATP; key enzyme in glycolysis and gluconeogenesis
YCR012W	K.ELQSLLGKDVTFLNDCVGPEVEAAVK.A	PGK1	3.993	925.481	-0.32	3-phosphoglycerate kinase, catalyzes transfer of high-energy phosphoryl groups from the acyl phosphate of 1,3-bisphosphoglycerate to ADP to produce ATP; key enzyme in glycolysis and gluconeogenesis
YCR031C	K.ADRDESSPYAAMLAAQDVAAK.C	RPS14A	4.124	732.679	-0.31	Ribosomal protein 59 of the small subunit, required for ribosome assembly and 20S pre-rRNA processing; mutations confer cryptopleurine resistance; nearly identical to Rps14Bp and similar to E. coli S11 and rat S14 ribosomal proteins
YCR031C	K.VKADRDESSPYAAMLAAQDVAAK.C	RPS14A	4.189	1212.1	0.62	Ribosomal protein 59 of the small subunit, required for ribosome assembly and 20S pre-rRNA processing; mutations confer cryptopleurine resistance; nearly identical to Rps14Bp and similar to E. coli S11 and rat S14 ribosomal proteins
YDL066W	K.DLALACGNNER.S	IDP1	2.953	588.278	1.08	Mitochondrial NADP-specific isocitrate dehydrogenase, catalyzes the oxidation of isocitrate to alpha-ketoglutarate; not required for mitochondrial respiration and may function to divert alpha-ketoglutarate to biosynthetic processes
YDL066W	K.RGELDNTPALCK.F	IDP1	3.405	658.835	0.38	Mitochondrial NADP-specific isocitrate dehydrogenase, catalyzes the oxidation of isocitrate to alpha-ketoglutarate; not required for mitochondrial respiration and may function to divert alpha-ketoglutarate to biosynthetic processes
YDL126C	R.LGDLVTIHPCPDIK.Y	CDC48	2.255	507.609	-0.18	ATPase in ER, nuclear membrane and cytosol with homology to mammalian p97; in a complex with Npl4p and Ufd1p participates in retrotranslocation of ubiquitinated proteins from the ER into the cytosol for degradation by the proteasome
YDL145C	K.YFTNIYEGCR.T	COP1	2.613	633.284	-1.15	Alpha subunit of COPI vesicle coatomer complex, which surrounds transport vesicles in the early secretory pathway
YDL171C	K.VIVVGGGDTGNDCLGTSVR.H	GLT1	4.475	909.954	-0.1	NAD(+)-dependent glutamate synthase (GOGAT), synthesizes glutamate from glutamine and alpha-ketoglutarate; with Gln1p, forms the secondary pathway for glutamate biosynthesis from ammonia; expression regulated by nitrogen source
YDL185W	K.LNLCAEYK.D	TFP1	2.663	477.242	0.06	Vacuolar ATPase V1 domain subunit A containing the catalytic nucleotide binding sites; protein precursor undergoes self-catalyzed splicing to yield the extein Tfp1p and the intein Vde (PI-SceI), which is a site-specific endonuclease
YDL201W	K.EWEENDECVK.I	TRM8	2.227	640.759	-0.12	Subunit of a tRNA methyltransferase complex composed of Trm8p and Trm82p that catalyzes 7-methylguanosine modification of tRNA
YDL229W	R.TFTTCADNQTTVQFPVYQGER.V	SSB1	4.572	802.706	0.44	Cytoplasmic ATPase that is a ribosome-associated molecular chaperone, functions with J-protein partner Zuo1p; may be involved in folding of newly-made polypeptide chains; member of the HSP70 family; interacts with phosphatase subunit Reg1p
YDR035W	K.RIMIDCSHGNSNK.D	ARO3	2.719	492.234	-0.26	3-deoxy-D-arabino-heptulosonate-7-phosphate (DAHP) synthase, catalyzes the first step in aromatic amino acid biosynthesis and is feedback-inhibited by phenylalanine or high concentration of tyrosine or tryptophan
YDR037W	K.EICNAYTELNDPFDQR.A	KRS1	3.15	964.428	-0.2	Lysyl-tRNA synthetase; also identified as a negative regulator of general control of amino acid biosynthesis
YDR062W	R.VPLCEPEELPDDIQKENEYGTLDSPGHLYQVK.S	LCB2	3.093	914.693	0.27	Component of serine palmitoyltransferase, responsible along with Lcb1p for the first committed step in sphingolipid synthesis, which is the condensation of serine with palmitoyl-CoA to form 3-ketosphinganine
YDR120C	K.YSVAQGPPVDTK.C	TRM1	3.126	631.325	-0.4	tRNA methyltransferase, localizes to both the nucleus and mitochondrion to produce the modified base N2,N2-dimethylguanosine in tRNAs in both compartments
YDR150W	K.ATDHHLLSDSAYEDLVK.C	NUM1	4.687	957.466	0.27	Protein required for nuclear migration, localizes to the mother cell cortex and the bud tip; may mediate interactions of dynein and cytoplasmic microtubules with the cell cortex
YDR172W	K.ERYDQCVSNVSNFLR.A	SUP35	2.753	610.624	-0.69	Translation termination factor eRF3; altered protein conformation creates the [PSI(+)] prion, a dominant cytoplasmically inherited protein aggregate that alters translational fidelity and creates a nonsense suppressor phenotype
YDR233C	K.TQEFSQMACEK.T	RTN1	3.88	651.279	0.45	ER membrane protein that interacts with exocyst subunit Sec6p and with Yip3p; also interacts with Sbh1p; null mutant has an altered (mostly cisternal) ER morphology; member of the RTNLA (reticulon-like A) subfamily
YDR234W	R.LSDLQSAADVVCPTGDLNK.V	LYS4	3.378	973.481	0.43	Homoaconitase, catalyzes the conversion of homocitrate to homoisocitrate, which is a step in the lysine biosynthesis pathway
YDR255C	K.FYTDSNLEETNLQK.C	RMD5	3.897	851.402	0.53	Cytosolic protein required for sporulation; also required for the ubiquitination of the gluconeogenetic enzyme fructose-1,6-bisphosphatase, which is degraded rapidly after the switch from gluconeogenesis to glycolysis
YDR321W	K.SQNAAVNGSGIACQQR.S	ASP1	4.332	802.384	0.27	Cytosolic L-asparaginase, involved in asparagine catabolism
YDR353W	R.NKPLAVIGGGDSACEEAQFLTK.Y	TRR1	2.888	750.048	0.06	Cytoplasmic thioredoxin reductase, key regulatory enzyme that determines the redox state of the thioredoxin system, which acts as a disulfide reductase system and protects cells against both oxidative and reductive stress
YDR353W	R.QAITSAGSGCMAALDAEK.Y	TRR1	5.104	870.399	-1.86	Cytoplasmic thioredoxin reductase, key regulatory enzyme that determines the redox state of the thioredoxin system, which acts as a disulfide reductase system and protects cells against both oxidative and reductive stress
YDR380W	K.LGELDFPEQLK.C	ARO10	3.455	644.843	-0.17	Phenylpyruvate decarboxylase, catalyzes decarboxylation of phenylpyruvate to phenylacetaldehyde, which is the first specific step in the Ehrlich pathway
YDR385W	R.AEQLYEGPADDANCIAIK.N	EFT2	5.304	960.954	-0.29	Elongation factor 2 (EF-2), also encoded by EFT1; catalyzes ribosomal translocation during protein synthesis; contains diphthamide, the unique posttranslationally modified histidine residue specifically ADP-ribosylated by diphtheria toxin
YDR418W	K.EILGTAQSVGCR.V	RPL12B	3.21	617.317	0.15	Protein component of the large (60S) ribosomal subunit, nearly identical to Rpl12Ap; rpl12a rpl12b double mutant exhibits slow growth and slow translation; has similarity to E. coli L11 and rat L12 ribosomal proteins
YDR432W	K.NLPEGCSWQDLK.D	NPL3	2.619	695.327	-0.08	RNA-binding protein that carries poly(A)+ mRNA from the nucleus into the cytoplasm; dissociation from mRNAs is promoted by Mtr10p; phosphorylated by Sky1p in the cytoplasm
YDR447C	K.RLCDEIATIQSK.R	RPS17B	3.522	688.864	-0.05	Ribosomal protein 51 (rp51) of the small (40s) subunit; nearly identical to Rps17Ap and has similarity to rat S17 ribosomal protein
YDR450W	R.RYSNLVCK.K	RPS18A	2.537	491.761	0.33	Protein component of the small (40S) ribosomal subunit; nearly identical to Rps18Bp and has similarity to E. coli S13 and rat S18 ribosomal proteins
YDR450W	R.YSNLVCK.K	RPS18A	2.175	413.71	0.07	Protein component of the small (40S) ribosomal subunit; nearly identical to Rps18Bp and has similarity to E. coli S13 and rat S18 ribosomal proteins
YEL037C	K.LAQSISCEESQIK.L	RAD23	3.852	718.358	-0.05	Protein with ubiquitin-like N terminus, recognizes and binds damaged DNA (with Rad4p) during nucleotide excision repair; regulates Rad4p levels, subunit of Nuclear Excision Repair Factor 2 (NEF2); homolog of human HR23A and HR23B proteins
YEL047C	K.ASSGINGACTETQR.H	YEL047C	3.613	697.82	-0.22	Soluble fumarate reductase, required with isoenzyme Osm1p for anaerobic growth; may interact with ribosomes, based on co-purification experiments; authentic, non-tagged protein is detected in purified mitochondria in high-throughput studies
YEL060C	K.TIPLNDEDLDGNGHGTHCAGTIASK.H	PRB1	1.158	846.062	-0.39	Vacuolar proteinase B (yscB), a serine protease of the subtilisin family; involved in protein degradation in the vacuole and required for full protein degradation during sporulation
YEL071W	K.VRDFDPVSGTFK.C	DLD3	2.833	456.57	-0.36	D-lactate dehydrogenase, part of the retrograde regulon which consists of genes whose expression is stimulated by damage to mitochondria and reduced in cells grown with glutamate as the sole nitrogen source, located in the cytoplasm
YER025W	R.SFKSDKEISPK.C	GCD11	3.028	422.563	-0.17	Gamma subunit of the translation initiation factor eIF2, involved in the identification of the start codon; binds GTP when forming the ternary complex with GTP and tRNAi-Met
YER043C	K.VAVVAGYGDVGKGCAAALR.G	SAH1	3.463	888.973	-1.64	S-adenosyl-L-homocysteine hydrolase, catabolizes S-adenosyl-L-homocysteine which is formed after donation of the activated methyl group of S-adenosyl-L-methionine (AdoMet) to an acceptor
YER062C	K.LCNALNALPK.E	HOR2	3.085	528.797	0.33	One of two redundant DL-glycerol-3-phosphatases (RHR2/GPP1 encodes the other) involved in glycerol biosynthesis; induced in response to hyperosmotic stress and oxidative stress, and during the diauxic transition
YER080W	K.IGPSVER.C	YER080W	1.907	379.214	0.27	Putative protein of unknown function; the authentic, non-tagged protein is detected in highly purified mitochondria in high-throughput studies; null mutant displays decreased frequency of mitochondrial genome loss (petite formation)
YER110C	R.AYANASGCVAR.M	KAP123	3.293	541.756	-0.84	Karyopherin beta, mediates nuclear import of ribosomal proteins prior to assembly into ribosomes and import of histones H3 and H4; localizes to the nuclear pore, nucleus, and cytoplasm; exhibits genetic interactions with RAI1
YER136W	K.APLVIADPTYFPEK.C	GDI1	3.513	780.919	-0.13	GDP dissociation inhibitor, regulates vesicle traffic in secretory pathways by regulating the dissociation of GDP from the Sec4/Ypt/rab family of GTP binding proteins
YFL021W	K.SSTSVQSSATPPSNTSSNPDIK.C	GAT1	3.984	1096.52	-0.42	Transcriptional activator of genes involved in nitrogen catabolite repression; contains a GATA-1-type zinc finger DNA-binding motif; activity and localization regulated by nitrogen limitation and Ure2p
YFL039C	K.QEYDESGPSIVHHK.C	ACT1	3.279	813.382	0.25	Actin, structural protein involved in cell polarization, endocytosis, and other cytoskeletal functions
YFL039C	R.FRAPEALFHPSVLGLESAGIDQTTYNSIMK.C	ACT1	2.575	827.921	0.16	Actin, structural protein involved in cell polarization, endocytosis, and other cytoskeletal functions
YGL006W	K.NLSFLDK.C	PMC1	2.152	418.729	-0.03	Vacuolar Ca2+ ATPase involved in depleting cytosol of Ca2+ ions; prevents growth inhibition by activation of calcineurin in the presence of elevated concentrations of calcium; similar to mammalian PMCA1a
YGL008C	K.KVTAVVESPEGERIVCVK.G	PMA1	4.59	972.035	-0.55	Plasma membrane H+-ATPase, pumps protons out of the cell; major regulator of cytoplasmic pH and plasma membrane potential; part of the P2 subgroup of cation-transporting ATPases
YGL019W	R.QYPSTEEDWEEFAK.C	CKB1	3.546	879.878	-0.56	Beta regulatory subunit of casein kinase 2, a Ser/Thr protein kinase with roles in cell growth and proliferation; the holoenzyme also contains CKA1, CKA2 and CKB2, the many substrates include transcription factors and all RNA polymerases
YGL026C	K.NVIAETGAGQHGVATATACAK.F	TRP5	7.25	985.492	0.19	Tryptophan synthase involved in tryptophan biosynthesis, regulated by the general control system of amino acid biosynthesis
YGL043W	K.IANGDITPEFLATCDAK.D	DST1	3.588	889.935	0.15	General transcription elongation factor TFIIS, enables RNA polymerase II to read through blocks to elongation by stimulating cleavage of nascent transcripts stalled at transcription arrest sites
YGL135W	K.SCGVDAMSVDDLK.K	RPL1B	4.113	670.297	-0.33	N-terminally acetylated protein component of the large (60S) ribosomal subunit, nearly identical to Rpl1Ap and has similarity to E. coli L1 and rat L10a ribosomal proteins; rpl1a rpl1b double null mutation is lethal
YGL135W	K.SCGVDAMSVDDLKK.L	RPL1B	3.294	734.345	1	N-terminally acetylated protein component of the large (60S) ribosomal subunit, nearly identical to Rpl1Ap and has similarity to E. coli L1 and rat L10a ribosomal proteins; rpl1a rpl1b double null mutation is lethal
YGL234W	K.DAPGCVIENGTK.L	ADE5	3.287	602.287	-0.26	Bifunctional enzyme of the 'de novo' purine nucleotide biosynthetic pathway, contains aminoimidazole ribotide synthetase and glycinamide ribotide synthetase activities
YGL234W	R.TAVDTVYEAVK.C	ADE5	3.073	598.314	0.05	Bifunctional enzyme of the 'de novo' purine nucleotide biosynthetic pathway, contains aminoimidazole ribotide synthetase and glycinamide ribotide synthetase activities
YGL245W	K.AYCDDTPTEK.M	GUS1	2.357	571.737	-0.72	Glutamyl-tRNA synthetase (GluRS), forms a complex with methionyl-tRNA synthetase (Mes1p) and Arc1p; complex formation increases the catalytic efficiency of both tRNA synthetases and ensures their correct localization to the cytoplasm
YGL253W	K.LSDDIPPSAPMAINCEYGSFDNEHVVLPR.T	HXK2	2.567	1068.17	0.02	Hexokinase isoenzyme 2 that catalyzes phosphorylation of glucose in the cytosol; predominant hexokinase during growth on glucose; functions in the nucleus to repress expression of HXK1 and GLK1 and to induce expression of its own gene
YGR094W	K.ESYPNGIPQCGTDAMR.F	VAS1	2.252	869.879	-1.12	Mitochondrial and cytoplasmic valyl-tRNA synthetase
YGR094W	K.NLYVGQEDNEMTIPTCSR.S	VAS1	3.784	1043.46	0.41	Mitochondrial and cytoplasmic valyl-tRNA synthetase
YGR124W	K.ADWGCAEDPSGR.Y	ASN2	3.68	632.257	0.17	Asparagine synthetase, isozyme of Asn1p; catalyzes the synthesis of L-asparagine from L-aspartate in the asparagine biosynthetic pathway
YGR124W	K.NLHLADCLR.A	ASN2	1.861	352.187	-0.06	Asparagine synthetase, isozyme of Asn1p; catalyzes the synthesis of L-asparagine from L-aspartate in the asparagine biosynthetic pathway
YGR124W	R.SSQSPETVYFASELK.C	ASN2	3.542	836.908	0.72	Asparagine synthetase, isozyme of Asn1p; catalyzes the synthesis of L-asparagine from L-aspartate in the asparagine biosynthetic pathway
YGR159C	K.EIDGRPINCDMSTSKPAGNNDR.A	NSR1	5.039	797.366	0.74	Nucleolar protein that binds nuclear localization sequences, required for pre-rRNA processing and ribosome biogenesis
YGR192C	K.IVSNASCTTNCLAPLAK.V	TDH3	4.872	853.434	-0.57	Glyceraldehyde-3-phosphate dehydrogenase, isozyme 3, involved in glycolysis and gluconeogenesis; tetramer that catalyzes the reaction of glyceraldehyde-3-phosphate to 1,3 bis-phosphoglycerate; detected in the cytoplasm and cell-wall
YGR240C	-.MQSQDSCYGVAFR.S	PFK1	4.349	754.318	-0.49	Alpha subunit of heterooctameric phosphofructokinase involved in glycolysis, indispensable for anaerobic growth, activated by fructose-2,6-bisphosphate and AMP, mutation inhibits glucose induction of cell cycle-related genes
YGR254W	K.IGLDCASSEFFK.D	ENO1	3.629	658.813	0.4	Enolase I, a phosphopyruvate hydratase that catalyzes the conversion of 2-phosphoglycerate to phosphoenolpyruvate during glycolysis and the reverse reaction during gluconeogenesis; expression is repressed in response to glucose
YGR279C	R.GITYTPYESSGACK.S	SCW4	3.62	738.837	-0.09	Cell wall protein with similarity to glucanases; scw4 scw10 double mutants exhibit defects in mating
YGR279C	R.LYGTDCNQVENVFK.A	SCW4	3.301	815.381	-1.28	Cell wall protein with similarity to glucanases; scw4 scw10 double mutants exhibit defects in mating
YHL001W	K.WAAAGVCEK.W	RPL14B	3.054	467.726	-0.16	Protein component of the large (60S) ribosomal subunit, nearly identical to Rpl14Ap and has similarity to rat L14 ribosomal protein
YHR007C	K.GVIYDCPNSR.L	ERG11	2.361	562.264	-0.03	Lanosterol 14-alpha-demethylase, catalyzes the C-14 demethylation of lanosterol to form 4,4''-dimethyl cholesta-8,14,24-triene-3-beta-ol in the ergosterol biosynthesis pathway; member of the cytochrome P450 family
YHR019C	K.YGTCPHGGYGIGTER.I	DED81	3.155	784.352	0.32	Cytosolic asparaginyl-tRNA synthetase, required for protein synthesis, catalyzes the specific attachment of asparagine to its cognate tRNA
YHR020W	K.FAGGDFTTTCEGYIPQTGR.G	YHR020W	3.451	1010.96	0.69	Protein of unknown function that may interact with ribosomes, based on co-purification experiments; has similarity to proline-tRNA ligase; YHR020W is an essential gene
YHR021C	R.SYFLDVK.C	RPS27B	1.836	436.232	0.75	Protein component of the small (40S) ribosomal subunit; nearly identical to Rps27Ap and has similarity to rat S27 ribosomal protein
YHR025W	K.YQWNPAIK.C	THR1	2.067	510.269	0.04	Homoserine kinase, conserved protein required for threonine biosynthesis; expression is regulated by the GCN4-mediated general amino acid control pathway
YHR068W	K.HGADCLEANQDVDSPIWTPSK.M	DYS1	3.058	761.683	-0.25	Deoxyhypusine synthase, catalyzes formation of deoxyhypusine, the first step in hypusine biosynthesis; triggers posttranslational hypusination of translation elongation factor eIF-5A and regulates its intracellular levels; tetrameric
YHR068W	K.MVDAVVTSAGGVEEDLIK.C	DYS1	4.216	924.965	-1.56	Deoxyhypusine synthase, catalyzes formation of deoxyhypusine, the first step in hypusine biosynthesis; triggers posttranslational hypusination of translation elongation factor eIF-5A and regulates its intracellular levels; tetrameric
YHR104W	R.LFDGACDYGNEK.E	GRE3	4.049	666.282	-0.4	Aldose reductase involved in methylglyoxal, d-xylose and arabinose metabolism; stress induced (osmotic, ionic, oxidative, heat shock, starvation and heavy metals); regulated by the HOG pathway
YHR183W	R.VLPECASDNLPVDK.D	GND1	2.585	750.374	-0.45	6-phosphogluconate dehydrogenase (decarboxylating), catalyzes an NADPH regenerating reaction in the pentose phosphate pathway; required for growth on D-glucono-delta-lactone and adaptation to oxidative stress
YHR203C	K.LSGCYAPRPSAGPHK.L	RPS4B	3.913	770.888	0.29	Protein component of the small (40S) ribosomal subunit; identical to Rps4Ap and has similarity to rat S4 ribosomal protein
YIL078W	K.NSSCYFLGDATNDSLQR.V	THS1	4.706	945.918	-0.33	Threonyl-tRNA synthetase, essential cytoplasmic protein
YIL078W	K.VPDGGATTVYR.C	THS1	3.141	568.291	-0.34	Threonyl-tRNA synthetase, essential cytoplasmic protein
YIL125W	R.YCGRNPSGAVAAGSK.S	KGD1	2.677	719.349	0.12	Component of the mitochondrial alpha-ketoglutarate dehydrogenase complex, which catalyzes a key step in the tricarboxylic acid (TCA) cycle, the oxidative decarboxylation of alpha-ketoglutarate to form succinyl-CoA
YIL142W	K.LLQSASSNTCMVTNDGATILK.S	CCT2	4.117	1092.04	0.4	Subunit beta of the cytosolic chaperonin Cct ring complex, related to Tcp1p, required for the assembly of actin and tubulins in vivo
YJL080C	K.LTKPINAVIEVPSK.C	SCP160	3.16	503.64	-0.15	Essential RNA-binding G protein effector of mating response pathway, mainly associated with nuclear envelope and ER, interacts in mRNA-dependent manner with translating ribosomes via multiple KH domains, similar to vertebrate vigilins
YJL121C	K.WVDDFAK.C	RPE1	2.381	440.713	-0.43	D-ribulose-5-phosphate 3-epimerase, catalyzes a reaction in the non-oxidative part of the pentose-phosphate pathway; mutants are sensitive to oxidative stress
YJL130C	R.GHNIPCTSTISGR.C	URA2	2.427	671.83	-0.3	Bifunctional carbamoylphosphate synthetase (CPSase)-aspartate transcarbamylase (ATCase), catalyzes the first two enzymatic steps in the de novo biosynthesis of pyrimidines; both activities are subject to feedback inhibition by UTP
YJL167W	K.IGTDIQDNK.C	ERG20	3.065	502.256	0.22	Farnesyl pyrophosphate synthetase, has both dimethylallyltranstransferase and geranyltranstransferase activities; catalyzes the formation of C15 farnesyl pyrophosphate units for isoprenoid and sterol biosynthesis
YJL167W	K.TLDENYGKKDSVAEAK.C	ERG20	3.783	884.442	0.66	Farnesyl pyrophosphate synthetase, has both dimethylallyltranstransferase and geranyltranstransferase activities; catalyzes the formation of C15 farnesyl pyrophosphate units for isoprenoid and sterol biosynthesis
YJR016C	K.LAECDNIGEYIK.K	ILV3	4.009	684.33	1.5	Dihydroxyacid dehydratase, catalyzes third step in the common pathway leading to biosynthesis of branched-chain amino acids
YJR016C	K.LAECDNIGEYIKK.T	ILV3	2.609	748.377	0.79	Dihydroxyacid dehydratase, catalyzes third step in the common pathway leading to biosynthesis of branched-chain amino acids
YJR105W	K.SMYQVQNDIGTGK.C	ADO1	4.114	728.84	-0.5	Adenosine kinase, required for the utilization of S-adenosylmethionine (AdoMet); may be involved in recycling adenosine produced through the methyl cycle
YJR123W	K.AQCPIIER.L	RPS5	1.836	465.247	0.02	Protein component of the small (40S) ribosomal subunit, the least basic of the non-acidic ribosomal proteins; phosphorylated in vivo; essential for viability; has similarity to E. coli S7 and rat S5 ribosomal proteins
YKL035W	K.LNGGLGTSMGCVGPK.S	UGP1	3.471	703.842	0	UDP-glucose pyrophosphorylase (UGPase), catalyses the reversible formation of UDP-Glc from glucose 1-phosphate and UTP, involved in a wide variety of metabolic pathways, expression modulated by Pho85p through Pho4p
YKL035W	K.TCSDLLLVK.S	UGP1	2.329	496.279	0.79	UDP-glucose pyrophosphorylase (UGPase), catalyses the reversible formation of UDP-Glc from glucose 1-phosphate and UTP, involved in a wide variety of metabolic pathways, expression modulated by Pho85p through Pho4p
YKL060C	K.VNLDTDCQYAYLTGIR.D	FBA1	5.678	922.944	-2.26	Fructose 1,6-bisphosphate aldolase, required for glycolysis and gluconeogenesis; catalyzes conversion of fructose 1,6 bisphosphate to glyceraldehyde-3-P and dihydroxyacetone-P; locates to mitochondrial outer surface upon oxidative stress
YKL060C	R.SIAPAYGIPVVLHSDHCAK.K	FBA1	3.89	989.514	-0.36	Fructose 1,6-bisphosphate aldolase, required for glycolysis and gluconeogenesis; catalyzes conversion of fructose 1,6 bisphosphate to glyceraldehyde-3-P and dihydroxyacetone-P; locates to mitochondrial outer surface upon oxidative stress
YKL067W	R.NVCHGSDSVDSAER.E	YNK1	3.173	738.312	-0.26	Nucleoside diphosphate kinase, catalyzes the transfer of gamma phosphates from nucleoside triphosphates, usually ATP, to nucleoside diphosphates by a mechanism that involves formation of an autophosphorylated enzyme intermediate
YKL081W	K.DVDACFVK.I	TEF4	2.502	448.713	-0.23	Translation elongation factor EF-1 gamma
YKL085W	K.IHPIGELSSEEEEMLQK.C	MDH1	4.256	656.991	-0.27	Mitochondrial malate dehydrogenase, catalyzes interconversion of malate and oxaloacetate; involved in the tricarboxylic acid (TCA) cycle; phosphorylated
YKL182W	K.NANIFSSVK.C	FAS1	2.943	490.264	-0.42	Beta subunit of fatty acid synthetase, which catalyzes the synthesis of long-chain saturated fatty acids; contains acetyltransacylase, dehydratase, enoyl reductase, malonyl transacylase, and palmitoyl transacylase activities
YKR080W	K.HHVEDLGEYSEDLLKK.C	MTD1	3.186	478.742	-0.07	NAD-dependent 5,10-methylenetetrahydrafolate dehydrogenase, plays a catalytic role in oxidation of cytoplasmic one-carbon units; expression is regulated by Bas1p and Bas2p, repressed by adenine, and may be induced by inositol and choline
YLL026W	K.SNPCLIGEPGIGK.T	HSP104	3.254	642.835	0.21	Heat shock protein that cooperates with Ydj1p (Hsp40) and Ssa1p (Hsp70) to refold and reactivate previously denatured, aggregated proteins; responsive to stresses including: heat, ethanol, and sodium arsenite; involved in [PSI+] propagation
YLR022C	K.GLVANKEDLQK.C	SDO1	2.754	607.84	-0.23	Essential protein involved in 60S ribosome maturation; ortholog of the human protein (SBDS) responsible for autosomal recessive Shwachman-Bodian-Diamond Syndrome; highly conserved across archae and eukaryotes
YLR028C	K.YTQSNSVCYAK.N	ADE16	3.25	632.287	0.01	Enzyme of 'de novo' purine biosynthesis containing both 5-aminoimidazole-4-carboxamide ribonucleotide transformylase and inosine monophosphate cyclohydrolase activities, isozyme of Ade17p; ade16 ade17 mutants require adenine and histidine
YLR029C	R.YNWICDPVHK.H	RPL15A	2.936	425.538	-0.24	Protein component of the large (60S) ribosomal subunit, nearly identical to Rpl15Bp and has similarity to rat L15 ribosomal protein; binds to 5.8 S rRNA
YLR044C	R.MSANISETTAMITDIATAPAEIDR.C	PDC1	3.789	852.071	-0.81	Major of three pyruvate decarboxylase isozymes, key enzyme in alcoholic fermentation, decarboxylates pyruvate to acetaldehyde; subject to glucose-, ethanol-, and autoregulation; involved in amino acid catabolism
YLR058C	R.MEILCQQR.A	SHM2	2.108	510.752	-0.39	Cytosolic serine hydroxymethyltransferase, converts serine to glycine plus 5,10 methylenetetrahydrofolate; major isoform involved in generating precursors for purine, pyrimidine, amino acid, and lipid biosynthesis
YLR058C	R.VEYICEK.I	SHM2	2.392	442.215	-0.15	Cytosolic serine hydroxymethyltransferase, converts serine to glycine plus 5,10 methylenetetrahydrofolate; major isoform involved in generating precursors for purine, pyrimidine, amino acid, and lipid biosynthesis
YLR058C	R.YYGGNEHIDRMEILCQQR.A	SHM2	2.722	742.346	0.34	Cytosolic serine hydroxymethyltransferase, converts serine to glycine plus 5,10 methylenetetrahydrofolate; major isoform involved in generating precursors for purine, pyrimidine, amino acid, and lipid biosynthesis
YLR060W	R.YCDEPFTVEPVEIVSEHNGQSR.L	FRS1	3.17	845.72	-0.44	Beta subunit of cytoplasmic phenylalanyl-tRNA synthetase, forms a tetramer with Frs2p to generate active enzyme; sequence is evolutionarily distant from mitochondrial phenylalanyl-tRNA synthetase (Msf1p), but substrate binding is similar
YLR075W	K.MLSCAGADR.L	RPL10	2.903	470.204	-0.75	Protein component of the large (60S) ribosomal subunit, responsible for joining the 40S and 60S subunits; regulates translation initiation; has similarity to rat L10 ribosomal protein and to members of the QM gene family
YLR075W	K.MLSCAGADRLQQGMR.G	RPL10	2.141	546.262	0.06	Protein component of the large (60S) ribosomal subunit, responsible for joining the 40S and 60S subunits; regulates translation initiation; has similarity to rat L10 ribosomal protein and to members of the QM gene family
YLR109W	K.FASDPGCAFTK.S	AHP1	2.737	572.26	-0.33	Thiol-specific peroxiredoxin, reduces hydroperoxides to protect against oxidative damage; function in vivo requires covalent conjugation to Urm1p
YLR109W	K.FQYIAISQSDADSESCK.M	AHP1	5.167	946.422	-0.82	Thiol-specific peroxiredoxin, reduces hydroperoxides to protect against oxidative damage; function in vivo requires covalent conjugation to Urm1p
YLR153C	K.LNASYNCVDR.H	ACS2	3.051	577.766	-1.23	Acetyl-coA synthetase isoform which, along with Acs1p, is the nuclear source of acetyl-coA for histone acetylation; mutants affect global transcription; required for growth on glucose; expressed under anaerobic conditions
YLR197W	R.QLYDYLCEK.M	SIK1	2.36	587.776	0.15	Essential evolutionarily-conserved nucleolar protein component of the box C/D snoRNP complexes that direct 2'-O-methylation of pre-rRNA during its maturation; overexpression causes spindle orientation defects
YLR216C	R.LIENQQCDQENNKPLR.D	CPR6	4.333	971.477	0.6	Peptidyl-prolyl cis-trans isomerase (cyclophilin), catalyzes the cis-trans isomerization of peptide bonds N-terminal to proline residues; binds to Hsp82p and contributes to chaperone activity
YLR249W	K.SAVIIDNMCK.L	YEF3	2.672	555.27	-0.11	Translational elongation factor 3, stimulates the binding of aminoacyl-tRNA (AA-tRNA) to ribosomes by releasing EF-1 alpha from the ribosomal complex; contains two ABC cassettes; binds and hydrolyses ATP
YLR249W	K.VTNMEFQYPGTSKPQITDINFQCSLSSR.I	YEF3	5.138	1069.84	-1.2	Translational elongation factor 3, stimulates the binding of aminoacyl-tRNA (AA-tRNA) to ribosomes by releasing EF-1 alpha from the ribosomal complex; contains two ABC cassettes; binds and hydrolyses ATP
YLR249W	K.YKGNFTEFVKK.C	YEF3	3.493	680.866	-0.65	Translational elongation factor 3, stimulates the binding of aminoacyl-tRNA (AA-tRNA) to ribosomes by releasing EF-1 alpha from the ribosomal complex; contains two ABC cassettes; binds and hydrolyses ATP
YLR249W	R.AIANGQVDGFPTQEECR.T	YEF3	4.293	917.923	0.35	Translational elongation factor 3, stimulates the binding of aminoacyl-tRNA (AA-tRNA) to ribosomes by releasing EF-1 alpha from the ribosomal complex; contains two ABC cassettes; binds and hydrolyses ATP
YLR259C	K.NVAAGCNPMDLR.R	HSP60	2.439	630.795	0.42	Tetradecameric mitochondrial chaperonin required for ATP-dependent folding of precursor polypeptides and complex assembly; prevents aggregation and mediates protein refolding after heat shock; role in mtDNA transmission; phosphorylated
YLR300W	R.KYPNQCGTISN.-	EXG1	2.6	612.788	0.39	Major exo-1,3-beta-glucanase of the cell wall, involved in cell wall beta-glucan assembly; exists as three differentially glycosylated isoenzymes
YLR301W	K.NWDSGCVEETGAVYPFGADK.E	YLR301W	4.093	1072.96	-0.06	Protein of unknown function that interacts with Sec72p
YLR304C	R.VGLIGSCTNSSYEDMSR.S	ACO1	5.346	917.901	-0.25	Aconitase, required for the tricarboxylic acid (TCA) cycle and also independently required for mitochondrial genome maintenance; phosphorylated; component of the mitochondrial nucleoid; mutation leads to glutamate auxotrophy
YLR355C	K.YGMDYMYDACSTTAR.R	ILV5	3.657	882.339	0.03	Acetohydroxyacid reductoisomerase, mitochondrial protein involved in branched-chain amino acid biosynthesis, also required for maintenance of wild-type mitochondrial DNA and found in mitochondrial nucleoids
YLR388W	K.YGLNICR.Q	RPS29A	2.623	419.716	-0.28	Protein component of the small (40S) ribosomal subunit; nearly identical to Rps29Bp and has similarity to rat S29 and E. coli S14 ribosomal proteins
YLR388W	R.VCSSHTGLIR.K	RPS29A	2.476	536.782	0.39	Protein component of the small (40S) ribosomal subunit; nearly identical to Rps29Bp and has similarity to rat S29 and E. coli S14 ribosomal proteins
YLR441C	R.VVEVCLADLQGSEDHSFR.K	RPS1A	4.86	1002.48	0.67	Ribosomal protein 10 (rp10) of the small (40S) subunit; nearly identical to Rps1Bp and has similarity to rat S3a ribosomal protein
YML008C	R.FTGCNVIGLNNNDYQIAK.A	ERG6	3.796	992.483	-0.31	Delta(24)-sterol C-methyltransferase, converts zymosterol to fecosterol in the ergosterol biosynthetic pathway by methylating position C-24; localized to both lipid particles and mitochondrial outer membrane
YML070W	K.SEPHITELDNQVGDGDCGYTLVAGVK.G	DAK1	4.759	906.428	-0.5	Dihydroxyacetone kinase, required for detoxification of dihydroxyacetone (DHA); involved in stress adaptation
YML072C	K.ANNDGVAVFDEECSFK.A	TCB3	4.54	872.877	-0.41	Lipid-binding protein, localized to the bud via specific mRNA transport; non-tagged protein detected in a phosphorylated state in mitochondria; GFP-fusion protein localizes to the cell periphery; C-termini of Tcb1p, Tcb2p and Tcb3p interact
YMR083W	K.YSGVCHTDLHAWHGDWPLPVK.L	ADH3	2.229	605.291	-0.4	Mitochondrial alcohol dehydrogenase isozyme III; involved in the shuttling of mitochondrial NADH to the cytosol under anaerobic conditions and ethanol production
YMR120C	K.YTQSNSVCYAR.N	ADE17	3.407	646.29	0.05	Enzyme of 'de novo' purine biosynthesis containing both 5-aminoimidazole-4-carboxamide ribonucleotide transformylase and inosine monophosphate cyclohydrolase activities, isozyme of Ade16p; ade16 ade17 mutants require adenine and histidine
YMR146C	K.KYETDCPLNTAVITPLK.E	TIF34	4.56	953.503	0.17	Subunit of the core complex of translation initiation factor 3(eIF3), which is essential for translation
YMR205C	R.GWSAEGGTNIGTAR.C	PFK2	4.37	688.831	-0.23	Beta subunit of heterooctameric phosphofructokinase involved in glycolysis, indispensable for anaerobic growth, activated by fructose-2,6-bisphosphate and AMP, mutation inhibits glucose induction of cell cycle-related genes
YMR215W	K.ESEISSDSIYK.C	GAS3	2.63	629.296	-0.47	Putative 1,3-beta-glucanosyltransferase, has similarity to Gas1p; localizes to the cell wall
YMR215W	R.IYSLNPDLNHDK.C	GAS3	3.475	714.859	-0.61	Putative 1,3-beta-glucanosyltransferase, has similarity to Gas1p; localizes to the cell wall
YMR217W	K.NFAVDLCHAK.Q	GUA1	3.056	559.276	-0.83	GMP synthase, an enzyme that catalyzes the second step in the biosynthesis of GMP from inosine 5'-phosphate (IMP); transcription is not subject to regulation by guanine but is negatively regulated by nutrient starvation
YMR222C	K.VQGLYNSCTEDSR.T	FSH2	4.389	736.327	-1.49	Serine hydrolase that localizes to the cytoplasm; sequence is similar to Fsh1p and Fsh3p
YMR246W	R.SNPYVQNICVYADENK.V	FAA4	3.263	928.929	1.65	Long chain fatty acyl-CoA synthetase, regulates protein modification during growth in the presence of ethanol, functions to incorporate palmitic acid into phospholipids and neutral lipids
YMR260C	R.DFQDDQCDVVHK.Y	TIF11	3.397	724.809	-0.66	Translation initiation factor eIF1A, essential protein that forms a complex with Sui1p (eIF1) and the 40S ribosomal subunit and scans for the start codon; C-terminus associates with Fun12p (eIF5B); N terminus interacts with eIF2 and eIF3
YMR260C	R.VEASCFDGNK.R	TIF11	3.047	535.234	-0.73	Translation initiation factor eIF1A, essential protein that forms a complex with Sui1p (eIF1) and the 40S ribosomal subunit and scans for the start codon; C-terminus associates with Fun12p (eIF5B); N terminus interacts with eIF2 and eIF3
YMR261C	R.VCSPSQEASASSISASR.S	TPS3	4.631	833.888	-0.56	Regulatory subunit of trehalose-6-phosphate synthase/phosphatase complex, which synthesizes the storage carbohydrate trehalose; expression is induced by stress conditions and repressed by the Ras-cAMP pathway
YMR290C	K.QNNAAPEGEQTTCVEK.F	HAS1	3.322	859.884	-1.96	ATP-dependent RNA helicase; localizes to both the nuclear periphery and nucleolus; highly enriched in nuclear pore complex fractions; constituent of 66S pre-ribosomal particles
YMR300C	R.GQDAAGIATCGSR.G	ADE4	4.17	603.78	0.11	Phosphoribosylpyrophosphate amidotransferase (PRPPAT; amidophosphoribosyltransferase), catalyzes first step of the 'de novo' purine nucleotide biosynthetic pathway
YMR307W	K.YGAYSFCTPK.E	GAS1	2.749	568.758	0.84	Beta-1,3-glucanosyltransferase, required for cell wall assembly; localizes to the cell surface via a glycosylphosphatidylinositol (GPI) anchor
YNL061W	R.ILLDAPCSGTGVIGK.D	NOP2	2.39	722.398	0.22	Probable RNA m(5)C methyltransferase, essential for processing and maturation of 27S pre-rRNA and large ribosomal subunit biogenesis; localized to the nucleolus; constituent of 66S pre-ribosomal particles
YNL064C	K.KATVDECVLADFDPAK.Y	YDJ1	5.22	861.422	-2.18	Protein chaperone involved in regulation of the HSP90 and HSP70 functions; involved in protein translocation across membranes; member of the DnaJ family
YNL134C	K.IGPQGALLGCDAAGQIVK.L	YNL134C	4.678	855.965	1.07	Putative protein of unknown function with similarity to dehydrogenases from other model organisms; green fluorescent protein (GFP)-fusion protein localizes to both the cytoplasm and nucleus and is induced by the DNA-damaging agent MMS
YNL135C	R.GSPFQCNIGVGQVIK.G	FPR1	2.998	773.906	0.09	Peptidyl-prolyl cis-trans isomerase (PPIase), binds to the drugs FK506 and rapamycin; also binds to the nonhistone chromatin binding protein Hmo1p and may regulate its assembly or function
YNL138W	K.NNKPSDSGADANTTNEPSAENAPEVEQDPK.C	SRV2	5.706	1042.8	-0.61	CAP (cyclase-associated protein) subunit of adenylyl cyclase complex; N-terminus binds adenylyl cyclase and facilitates activation by RAS; C-terminus binds ADP-actin monomers, facilitating regulation of actin dynamics and cell morphogenesis
YNL157W	R.ISTCPSTASTAGVVDNATLIQK.E	YNL157W	4.74	1089.06	-0.97	Hypothetical protein
YNL241C	K.SEDGSKPAYVDDDTVDKDSK.C	ZWF1	5.04	724.325	-0.22	Glucose-6-phosphate dehydrogenase (G6PD), catalyzes the first step of the pentose phosphate pathway; involved in adapting to oxidatve stress; homolog of the human G6PD which is deficient in patients with hemolytic anemia
YNL244C	K.DFACNGNIVKDPEMGEIIQLQGDQR.A	SUI1	4.951	936.11	0.54	Translation initiation factor eIF1; component of a complex involved in recognition of the initiator codon; modulates translation accuracy at the initiation phase
YNL301C	K.AGGECITLDQLAVR.A	RPL18B	4.3	723.375	0.44	Protein component of the large (60S) ribosomal subunit, identical to Rpl18Ap and has similarity to rat L18 ribosomal protein
YNR016C	K.TIIGSEDGLGVECLR.G	ACC1	3.814	781.398	-0.08	Acetyl-CoA carboxylase, biotin containing enzyme that catalyzes the carboxylation of acetyl-CoA to form malonyl-CoA; required for de novo biosynthesis of long-chain fatty acids
YNR046W	K.FLTTNFLK.C	TRM112	1.783	492.282	0.42	Subunit of an adoMet-dependent tRNA methyltransferase (MTase) complex (Trm11p-Trm112p), required for the methylation of the guanosine nucleotide at position 10 (m2G10) in tRNAs; putative zinc binding subunit of other MTase-related proteins
YOL030W	R.VYTVDNSQDHSHCMK.L	GAS5	4.971	882.378	1.01	1,3-beta-glucanosyltransferase, has similarity to Gas1p; localizes to the cell wall
YOL086C	R.ANGTTVLVGMPAGAK.C	ADH1	3.796	701.871	-0.28	Alcohol dehydrogenase, fermentative isozyme active as homo- or heterotetramers; required for the reduction of acetaldehyde to ethanol, the last step in the glycolytic pathway
YOR027W	K.FSDALNDANECVK.I	STI1	4.322	713.319	-0.72	Hsp90 cochaperone, interacts with the Ssa group of the cytosolic Hsp70 chaperones; activates the ATPase activity of Ssa1p; homolog of mammalian Hop protein
YOR027W	K.LMSFPEAIADCNK.A	STI1	2.964	727.836	-0.08	Hsp90 cochaperone, interacts with the Ssa group of the cytosolic Hsp70 chaperones; activates the ATPase activity of Ssa1p; homolog of mammalian Hop protein
YOR086C	K.YYINNEEDCAYK.T	TCB1	3.253	762.819	-0.48	Lipid-binding protein containing three calcium and lipid binding domains; non-tagged protein localizes to mitochondria and GFP-fusion protein localizes to the cell periphery; C-termini of Tcb1p, Tcb2p and Tcb3p interact
YOR142W	R.LVGPNCPGIINPATK.V	LSC1	2.268	747.411	-0.06	Alpha subunit of succinyl-CoA ligase, which is a mitochondrial enzyme of the TCA cycle that catalyzes the nucleotide-dependent conversion of succinyl-CoA to succinate; phosphorylated
YOR184W	K.ILYEALDANSDFYNVPVDPK.C	SER1	2.934	1142.06	-1.69	3-phosphoserine aminotransferase, catalyzes the formation of phosphoserine from 3-phosphohydroxypyruvate, required for serine and glycine biosynthesis; regulated by the general control of amino acid biosynthesis mediated by Gcn4p
YOR204W	R.DLMACAQTGSGK.T	DED1	3.933	591.268	0.03	ATP-dependent DEAD (Asp-Glu-Ala-Asp)-box RNA helicase, required for translation initiation of all yeast mRNAs; mutations in human DEAD-box DBY are a frequent cause of male infertility
YOR204W	R.HIVEDCDMTPVGER.Q	DED1	3.55	808.856	0.05	ATP-dependent DEAD (Asp-Glu-Ala-Asp)-box RNA helicase, required for translation initiation of all yeast mRNAs; mutations in human DEAD-box DBY are a frequent cause of male infertility
YOR209C	K.IICYSDSLNVEK.A	NPT1	3.427	692.345	-0.11	Nicotinate phosphoribosyltransferase, acts in the salvage pathway of NAD+ biosynthesis; required for silencing at rDNA and telomeres and has a role in silencing at mating-type loci; localized to the nucleus
YOR220W	R.SNAASCTENDVNATASNPPK.S	YOR220W	4.954	995.943	0.55	Protein of unknown function; green fluorescent protein (GFP)-fusion protein localizes to the cytoplasm and is induced in response to the DNA-damaging agent MMS
YOR224C	R.IEAASTTQDQCK.L	RPB8	3.031	647.801	0.11	RNA polymerase subunit ABC14.5, common to RNA polymerases I, II, and III
YOR272W	K.TWDLVTAR.C	YTM1	2.622	481.259	0.47	Constituent of 66S pre-ribosomal particles, required for maturation of the large ribosomal subunit
YOR276W	K.VTTDSDGWCTFEAK.K	CAF20	3.958	780.337	-0.69	Phosphoprotein of the mRNA cap-binding complex involved in translational control, repressor of cap-dependent translation initiation, competes with eIF4G for binding to eIF4E
YOR323C	K.LTEAIQCK.T	PRO2	2.678	453.242	0.24	Gamma-glutamyl phosphate reductase, catalyzes the second step in proline biosynthesis
YOR323C	K.TNYPAGCNAMETLLINPK.F	PRO2	3.909	983.474	-0.1	Gamma-glutamyl phosphate reductase, catalyzes the second step in proline biosynthesis
YOR335C	K.KVEDICNEQIK.E	ALA1	3.286	440.227	0.11	Cytoplasmic alanyl-tRNA synthetase, required for protein synthesis; point mutation (cdc64-1 allele) causes cell cycle arrest at G1; lethality of null mutation is functionally complemented by human homolog
YOR335C	R.VAHGCYISNAALAK.G	ALA1	3.835	709.368	1.51	Cytoplasmic alanyl-tRNA synthetase, required for protein synthesis; point mutation (cdc64-1 allele) causes cell cycle arrest at G1; lethality of null mutation is functionally complemented by human homolog
YOR361C	K.TQFSNLQICR.L	PRT1	2.402	605.305	-0.92	Subunit of the core complex of translation initiation factor 3(eIF3), essential for translation; part of a subcomplex (Prt1p-Rpg1p-Nip1p) that stimulates binding of mRNA and tRNA(i)Met to ribosomes
YOR375C	K.VDIALPCATQNEVSGEEAK.A	GDH1	4.216	987.477	-1.31	NADP(+)-dependent glutamate dehydrogenase, synthesizes glutamate from ammonia and alpha-ketoglutarate; rate of alpha-ketoglutarate utilization differs from Gdh3p; expression regulated by nitrogen and carbon sources
YPL028W	K.AIILGAQSIK.C	ERG10	2.821	507.321	-0.28	Acetyl-CoA C-acetyltransferase (acetoacetyl-CoA thiolase), cytosolic enzyme that transfers an acetyl group from one acetyl-CoA molecule to another, forming acetoacetyl-CoA; involved in the first step in mevalonate biosynthesis
YPL061W	R.GDVTIAINCLR.D	ALD6	2.895	587.816	0.45	Cytosolic aldehyde dehydrogenase, activated by Mg2+ and utilizes NADP+ as the preferred coenzyme; required for conversion of acetaldehyde to acetate; constitutively expressed; locates to the mitochondrial outer surface upon oxidative stress
YPL091W	K.ADFDNCVAIHPTSAEELVTMR.-	GLR1	3.248	779.028	0.61	Cytosolic and mitochondrial glutathione oxidoreductase, converts oxidized glutathione to reduced glutathione
YPL106C	K.VLGTACDK.H	SSE1	2.383	403.707	-0.05	ATPase that is a component of the heat shock protein Hsp90 chaperone complex; binds unfolded proteins; member of the heat shock protein 70 (HSP70) family; localized to the cytoplasm
YPL126W	R.SVNNSQGCLTADNNGGLK.F	NAN1	3.471	896.417	-1.07	U3 snoRNP protein, component of the small (ribosomal) subunit (SSU) processosome containing U3 snoRNA; required for the biogenesis of18S rRNA
YPL160W	K.GTGVVTCVPSNSPDDYITTK.D	CDC60	3.903	1027.49	-0.66	Cytosolic leucyl tRNA synthetase, ligates leucine to the appropriate tRNA
YPL231W	K.TLGEQLIENCK.Q	FAS2	3.175	624.319	0.4	Alpha subunit of fatty acid synthetase, which catalyzes the synthesis of long-chain saturated fatty acids; contains beta-ketoacyl reductase and beta-ketoacyl synthase activities; phosphorylated
YPR004C	R.ASVDNGLCDNSLQIGQTGK.V	YPR004C	2.937	960.46	-0.49	Protein with similarity to mammalian electron transfer flavoprotein complex subunit ETF-alpha; interacts with yeast frataxin Yfh1p; null mutant displays increased frequency of mitochondrial genome loss (petite formation)
YPR035W	K.GGYPAPQGPYYCGVGAGK.V	GLN1	3.751	871.403	-0.33	Glutamine synthetase (GS), synthesizes glutamine from glutamate and ammonia; with Glt1p, forms the secondary pathway for glutamate biosynthesis from ammonia; expression regulated by nitrogen source and by amino acid limitation
YPR062W	R.GHEVVVVDDER.C	FCY1	3.352	627.309	-1.44	Cytosine deaminase, zinc metalloenzyme that catalyzes the hydrolytic deamination of cytosine to uracil; of biomedical interest because it also catalyzes the deamination of 5-fluorocytosine (5FC) to form anticancer drug 5-fluorouracil (5FU)
YPR184W	R.LSDTGEPITSCSYGK.G	GDB1	3.449	779.359	0.73	Glycogen debranching enzyme containing glucanotranferase and alpha-1,6-amyloglucosidase activities, required for glycogen degradation; phosphorylated in mitochondria

## Sheet: Overall
Table S1(D). Peptides containing cysteine identified from the triplicate experiments without the enrichment and reduction/alkylation
Reference	Peptide	Gene symbol	ID in Expt. 1	ID in Expt. 2	ID in Expt. 3	Annotation
R0040C	R.TAYSVWDVCR.L	REP2	No	No	Yes	Master regulator that acts in concert with Rep1p to regulate transcript levels of the FLP1 gene that promotes plasmid copy amplification; also autoregulates levels of its own transcript
YAL023C	K.NQALGGSLLHSHIQTYPDGSNQQQVTCYGYK.D	PMT2	Yes	No	Yes	Protein O-mannosyltransferase, transfers mannose residues from dolichyl phosphate-D-mannose to protein serine/threonine residues; acts in a complex with Pmt1p, can instead interact with Pmt5p in some conditions; target for new antifungals
YAL038W	K.YRPNCPIILVTR.C	CDC19	Yes	No	Yes	Pyruvate kinase, functions as a homotetramer in glycolysis to convert phosphoenolpyruvate to pyruvate, the input for aerobic (TCA cycle) or anaerobic (glucose fermentation) respiration
YAL038W	R.AEVSDVGNAILDGADCVMLSGETAK.G	CDC19	No	Yes	Yes	Pyruvate kinase, functions as a homotetramer in glycolysis to convert phosphoenolpyruvate to pyruvate, the input for aerobic (TCA cycle) or anaerobic (glucose fermentation) respiration
YAR007C	K.VLEQPDGTWR.C	RFA1	Yes	Yes	Yes	Subunit of heterotrimeric Replication Protein A (RPA), which is a highly conserved single-stranded DNA binding protein involved in DNA replication, repair, and recombination
YAR010C	K.EVHTNQDPLDVSASKTEECEK.A	YAR010C	Yes	No	Yes	Retrotransposon TYA Gag gene co-transcribed with TYB Pol; in YARCTY1-1 TYB is mutant and probably non-functional
YAR010C	K.VACQLIMR.G	YAR010C	Yes	Yes	No	Retrotransposon TYA Gag gene co-transcribed with TYB Pol; in YARCTY1-1 TYB is mutant and probably non-functional
YBL017C	K.NYFLAK.C	PEP1	No	No	Yes	Type I transmembrane sorting receptor for multiple vacuolar hydrolases; cycles between the late-Golgi and prevacuolar endosome-like compartments
YBL030C	K.YAGILDCFKR.T	PET9	Yes	Yes	Yes	Major ADP/ATP carrier of the mitochondrial inner membrane, exchanges cytosolic ADP for mitochondrially synthesized ATP; phosphorylated; required for viability in many common lab strains carrying a mutation in the polymorphic SAL1 gene
YBL030C	K.YDGAFDCLRK.I	PET9	Yes	No	No	Major ADP/ATP carrier of the mitochondrial inner membrane, exchanges cytosolic ADP for mitochondrially synthesized ATP; phosphorylated; required for viability in many common lab strains carrying a mutation in the polymorphic SAL1 gene
YBL050W	K.AGNEDEAGNTYVEAYK.C	SEC17	Yes	Yes	Yes	Peripheral membrane protein required for vesicular transport between ER and Golgi and for the 'priming' step in homotypic vacuole fusion, part of the cis-SNARE complex; has similarity to alpha-SNAP
YBL050W	K.KAGNEDEAGNTYVEAYK.C	SEC17	Yes	Yes	Yes	Peripheral membrane protein required for vesicular transport between ER and Golgi and for the 'priming' step in homotypic vacuole fusion, part of the cis-SNARE complex; has similarity to alpha-SNAP
YBL050W	K.SLIDAVNEGDSEQLSEHCK.E	SEC17	No	No	Yes	Peripheral membrane protein required for vesicular transport between ER and Golgi and for the 'priming' step in homotypic vacuole fusion, part of the cis-SNARE complex; has similarity to alpha-SNAP
YBL076C	K.LGITGKDDVFKYGLENYNNECR.S	ILS1	Yes	Yes	Yes	Cytoplasmic isoleucine-tRNA synthetase, target of the G1-specific inhibitor reveromycin A
YBL076C	K.YGLENYNNECR.S	ILS1	Yes	Yes	Yes	Cytoplasmic isoleucine-tRNA synthetase, target of the G1-specific inhibitor reveromycin A
YBL076C	R.VISDDYVTSDSGTGIVHNAPAFGEEDNAACLK.N	ILS1	Yes	No	Yes	Cytoplasmic isoleucine-tRNA synthetase, target of the G1-specific inhibitor reveromycin A
YBL087C	R.ISLGLPVGAIMNCADNSGAR.N	RPL23A	Yes	Yes	Yes	Protein component of the large (60S) ribosomal subunit, identical to Rpl23Bp and has similarity to E. coli L14 and rat L23 ribosomal proteins
YBR025C	K.STFFQAITR.C	OLA1	Yes	Yes	Yes	P-loop ATPase with similarity to human OLA1 and bacterial YchF; identified as specifically interacting with the proteasome; protein levels are induced by hydrogen peroxide
YBR031W	R.SGQGAFGNMCR.G	RPL4A	Yes	Yes	Yes	N-terminally acetylated protein component of the large (60S) ribosomal subunit, nearly identical to Rpl4Bp and has similarity to E. coli L4 and rat L4 ribosomal proteins
YBR048W	K.TAIEGSYIDKK.C	RPS11B	Yes	No	No	Protein component of the small (40S) ribosomal subunit; identical to Rps11Ap and has similarity to E. coli S17 and rat S11 ribosomal proteins
YBR078W	K.KLQSNGAIQGDSFVCK.N	ECM33	Yes	Yes	Yes	GPI-anchored protein of unknown function, has a possible role in apical bud growth; GPI-anchoring on the plasma membrane crucial to function; phosphorylated in mitochondria; similar to Sps2p and Pst1p
YBR118W	K.FVPSKPMCVEAFSEYPPLGR.F	TEF2	Yes	Yes	Yes	Translational elongation factor EF-1 alpha; also encoded by TEF1; functions in the binding reaction of aminoacyl-tRNA (AA-tRNA) to ribosomes
YBR118W	R.GNVCGDAKNDPPK.G	TEF2	No	Yes	Yes	Translational elongation factor EF-1 alpha; also encoded by TEF1; functions in the binding reaction of aminoacyl-tRNA (AA-tRNA) to ribosomes
YBR118W	R.RGNVCGDAKNDPPK.G	TEF2	Yes	No	No	Translational elongation factor EF-1 alpha; also encoded by TEF1; functions in the binding reaction of aminoacyl-tRNA (AA-tRNA) to ribosomes
YBR130C	K.NSSAIEQSCSEK.L	SHE3	No	Yes	Yes	Protein that acts as an adaptor between Myo4p and the She2p-mRNA complex; part of the mRNA localization machinery that restricts accumulation of certain proteins to the bud; also required for cortical ER inheritance
YBR139W	K.GGYHPVLSSEECEK.M	YBR139W	Yes	No	No	Putative serine type carboxypeptidase with a role in phytochelatin synthesis; green fluorescent protein (GFP)-fusion protein localizes to the vacuole; expression induced by nitrogen limitation in a GLN3, GAT1-independent manner
YBR151W	K.TLNCAVSSLPK.D	APD1	No	No	Yes	Protein of unknown function, required for normal localization of actin patches and for normal tolerance of sodium ions and hydrogen peroxide; localizes to both cytoplasm and nucleus
YBR218C	R.LDGGNAYAGATISPHYDSMLVK.C	PYC2	Yes	Yes	Yes	Pyruvate carboxylase isoform, cytoplasmic enzyme that converts pyruvate to oxaloacetate; highly similar to isoform Pyc1p but differentially regulated; mutations in the human homolog are associated with lactic acidosis
YBR263W	R.YYGGNEIIDKSESLCQAR.A	SHM1	Yes	Yes	No	Mitochondrial serine hydroxymethyltransferase, converts serine to glycine plus 5,10 methylenetetrahydrofolate; involved in generating precursors for purine, pyrimidine, amino acid, and lipid biosynthesis; reverse reaction generates serine
YBR282W	R.VQSEGATDTSCYK.E	MRPL27	No	No	Yes	Mitochondrial ribosomal protein of the large subunit
YBR286W	K.LVEIPNLGCEEK.D	APE3	Yes	Yes	Yes	Vacuolar aminopeptidase Y, processed to mature form by Prb1p
YCL030C	K.FHAAQLPTETLEVETQPGVLCSR.F	HIS4	Yes	Yes	Yes	Multifunctional enzyme containing phosphoribosyl-ATP pyrophosphatase, phosphoribosyl-AMP cyclohydrolase, and histidinol dehydrogenase activities; catalyzes the second, third, ninth and tenth steps in histidine biosynthesis
YCL030C	K.LLQISTDCDSDALK.F	HIS4	Yes	Yes	Yes	Multifunctional enzyme containing phosphoribosyl-ATP pyrophosphatase, phosphoribosyl-AMP cyclohydrolase, and histidinol dehydrogenase activities; catalyzes the second, third, ninth and tenth steps in histidine biosynthesis
YCL030C	K.LVDNAGSVFVGAYTPESCGDYSSGTNHTLPTYGYAR.Q	HIS4	Yes	Yes	Yes	Multifunctional enzyme containing phosphoribosyl-ATP pyrophosphatase, phosphoribosyl-AMP cyclohydrolase, and histidinol dehydrogenase activities; catalyzes the second, third, ninth and tenth steps in histidine biosynthesis
YCL050C	K.LLCALDNEESDKR.H	APA1	No	Yes	No	Diadenosine 5',5''-P1,P4-tetraphosphate phosphorylase I (AP4A phosphorylase), involved in catabolism of bis(5'-nucleosidyl) tetraphosphates; has similarity to Apa2p
YCL059C	K.ALELLTK.C	KRR1	Yes	No	No	Essential nucleolar protein required for the synthesis of 18S rRNA and for the assembly of 40S ribosomal subunit
YCR012W	K.DVTFLNDCVGPEVEAAVK.A	PGK1	Yes	No	Yes	3-phosphoglycerate kinase, catalyzes transfer of high-energy phosphoryl groups from the acyl phosphate of 1,3-bisphosphoglycerate to ADP to produce ATP; key enzyme in glycolysis and gluconeogenesis
YCR012W	K.ELQSLLGKDVTFLNDCVGPEVEAAVK.A	PGK1	No	No	Yes	3-phosphoglycerate kinase, catalyzes transfer of high-energy phosphoryl groups from the acyl phosphate of 1,3-bisphosphoglycerate to ADP to produce ATP; key enzyme in glycolysis and gluconeogenesis
YCR031C	K.ADRDESSPYAAMLAAQDVAAK.C	RPS14A	Yes	Yes	Yes	Ribosomal protein 59 of the small subunit, required for ribosome assembly and 20S pre-rRNA processing; mutations confer cryptopleurine resistance; nearly identical to Rps14Bp and similar to E. coli S11 and rat S14 ribosomal proteins
YCR031C	K.VKADRDESSPYAAMLAAQDVAAK.C	RPS14A	Yes	Yes	Yes	Ribosomal protein 59 of the small subunit, required for ribosome assembly and 20S pre-rRNA processing; mutations confer cryptopleurine resistance; nearly identical to Rps14Bp and similar to E. coli S11 and rat S14 ribosomal proteins
YDL014W	K.ANCIDSTVDAETVFAR.E	NOP1	No	Yes	No	Nucleolar protein, component of the small subunit processome complex, which is required for processing of pre-18S rRNA; has similarity to mammalian fibrillarin
YDL055C	R.SVVLCNSTIK.N	PSA1	Yes	No	No	GDP-mannose pyrophosphorylase (mannose-1-phosphate guanyltransferase), synthesizes GDP-mannose from GTP and mannose-1-phosphate in cell wall biosynthesis; required for normal cell wall structure
YDL061C	R.VCSSHTGLVR.K	RPS29B	No	Yes	No	Protein component of the small (40S) ribosomal subunit; nearly identical to Rps29Ap and has similarity to rat S29 and E. coli S14 ribosomal proteins
YDL066W	K.DLALACGNNER.S	IDP1	Yes	Yes	Yes	Mitochondrial NADP-specific isocitrate dehydrogenase, catalyzes the oxidation of isocitrate to alpha-ketoglutarate; not required for mitochondrial respiration and may function to divert alpha-ketoglutarate to biosynthetic processes
YDL066W	K.RGELDNTPALCK.F	IDP1	No	Yes	Yes	Mitochondrial NADP-specific isocitrate dehydrogenase, catalyzes the oxidation of isocitrate to alpha-ketoglutarate; not required for mitochondrial respiration and may function to divert alpha-ketoglutarate to biosynthetic processes
YDL088C	R.IFHNHDTGCDENDSTVNK.S	ASM4	Yes	Yes	No	Nuclear pore complex subunit, part of a subcomplex also containing Nup53p, Nup170p, and Pse1p
YDL126C	R.LGDLVTIHPCPDIK.Y	CDC48	Yes	No	Yes	ATPase in ER, nuclear membrane and cytosol with homology to mammalian p97; in a complex with Npl4p and Ufd1p participates in retrotranslocation of ubiquitinated proteins from the ER into the cytosol for degradation by the proteasome
YDL131W	R.VGIADTVGCANPR.Q	LYS21	Yes	Yes	No	Homocitrate synthase isozyme, catalyzes the condensation of acetyl-CoA and alpha-ketoglutarate to form homocitrate, which is the first step in the lysine biosynthesis pathway; highly similar to the other isozyme, Lys20p
YDL145C	K.YFTNIYEGCR.T	COP1	No	No	Yes	Alpha subunit of COPI vesicle coatomer complex, which surrounds transport vesicles in the early secretory pathway
YDL171C	K.VIVVGGGDTGNDCLGTSVR.H	GLT1	No	Yes	Yes	NAD(+)-dependent glutamate synthase (GOGAT), synthesizes glutamate from glutamine and alpha-ketoglutarate; with Gln1p, forms the secondary pathway for glutamate biosynthesis from ammonia; expression regulated by nitrogen source
YDL185W	K.LNLCAEYK.D	TFP1	Yes	Yes	Yes	Vacuolar ATPase V1 domain subunit A containing the catalytic nucleotide binding sites; protein precursor undergoes self-catalyzed splicing to yield the extein Tfp1p and the intein Vde (PI-SceI), which is a site-specific endonuclease
YDL201W	K.EWEENDECVK.I	TRM8	No	No	Yes	Subunit of a tRNA methyltransferase complex composed of Trm8p and Trm82p that catalyzes 7-methylguanosine modification of tRNA
YDL229W	R.TFTTCADNQTTVQFPVYQGER.V	SSB1	Yes	Yes	Yes	Cytoplasmic ATPase that is a ribosome-associated molecular chaperone, functions with J-protein partner Zuo1p; may be involved in folding of newly-made polypeptide chains; member of the HSP70 family; interacts with phosphatase subunit Reg1p
YDR035W	K.RIMIDCSHGNSNK.D	ARO3	Yes	No	Yes	3-deoxy-D-arabino-heptulosonate-7-phosphate (DAHP) synthase, catalyzes the first step in aromatic amino acid biosynthesis and is feedback-inhibited by phenylalanine or high concentration of tyrosine or tryptophan
YDR037W	K.EICNAYTELNDPFDQR.A	KRS1	Yes	Yes	Yes	Lysyl-tRNA synthetase; also identified as a negative regulator of general control of amino acid biosynthesis
YDR037W	K.ILVDNKLECPPPLTNAR.M	KRS1	Yes	Yes	No	Lysyl-tRNA synthetase; also identified as a negative regulator of general control of amino acid biosynthesis
YDR062W	R.VPLCEPEELPDDIQKENEYGTLDSPGHLYQVK.S	LCB2	Yes	Yes	Yes	Component of serine palmitoyltransferase, responsible along with Lcb1p for the first committed step in sphingolipid synthesis, which is the condensation of serine with palmitoyl-CoA to form 3-ketosphinganine
YDR120C	K.YSVAQGPPVDTK.C	TRM1	Yes	Yes	Yes	tRNA methyltransferase, localizes to both the nucleus and mitochondrion to produce the modified base N2,N2-dimethylguanosine in tRNAs in both compartments
YDR150W	K.ATDHHLLSDSAYEDLVK.C	NUM1	No	Yes	Yes	Protein required for nuclear migration, localizes to the mother cell cortex and the bud tip; may mediate interactions of dynein and cytoplasmic microtubules with the cell cortex
YDR172W	K.ERYDQCVSNVSNFLR.A	SUP35	No	No	Yes	Translation termination factor eRF3; altered protein conformation creates the [PSI(+)] prion, a dominant cytoplasmically inherited protein aggregate that alters translational fidelity and creates a nonsense suppressor phenotype
YDR233C	K.TQEFSQMACEK.T	RTN1	Yes	Yes	Yes	ER membrane protein that interacts with exocyst subunit Sec6p and with Yip3p; also interacts with Sbh1p; null mutant has an altered (mostly cisternal) ER morphology; member of the RTNLA (reticulon-like A) subfamily
YDR234W	R.LSDLQSAADVVCPTGDLNK.V	LYS4	No	No	Yes	Homoaconitase, catalyzes the conversion of homocitrate to homoisocitrate, which is a step in the lysine biosynthesis pathway
YDR255C	K.FYTDSNLEETNLQK.C	RMD5	No	No	Yes	Cytosolic protein required for sporulation; also required for the ubiquitination of the gluconeogenetic enzyme fructose-1,6-bisphosphatase, which is degraded rapidly after the switch from gluconeogenesis to glycolysis
YDR321W	K.SQNAAVNGSGIACQQR.S	ASP1	No	No	Yes	Cytosolic L-asparaginase, involved in asparagine catabolism
YDR353W	R.NKPLAVIGGGDSACEEAQFLTK.Y	TRR1	No	No	Yes	Cytoplasmic thioredoxin reductase, key regulatory enzyme that determines the redox state of the thioredoxin system, which acts as a disulfide reductase system and protects cells against both oxidative and reductive stress
YDR353W	R.QAITSAGSGCMAALDAEK.Y	TRR1	Yes	Yes	Yes	Cytoplasmic thioredoxin reductase, key regulatory enzyme that determines the redox state of the thioredoxin system, which acts as a disulfide reductase system and protects cells against both oxidative and reductive stress
YDR380W	K.LGELDFPEQLK.C	ARO10	Yes	Yes	Yes	Phenylpyruvate decarboxylase, catalyzes decarboxylation of phenylpyruvate to phenylacetaldehyde, which is the first specific step in the Ehrlich pathway
YDR385W	R.AEQLYEGPADDANCIAIK.N	EFT2	Yes	Yes	Yes	Elongation factor 2 (EF-2), also encoded by EFT1; catalyzes ribosomal translocation during protein synthesis; contains diphthamide, the unique posttranslationally modified histidine residue specifically ADP-ribosylated by diphtheria toxin
YDR385W	R.KIWCFGPDGNGPNLVIDQTK.A	EFT2	Yes	Yes	No	Elongation factor 2 (EF-2), also encoded by EFT1; catalyzes ribosomal translocation during protein synthesis; contains diphthamide, the unique posttranslationally modified histidine residue specifically ADP-ribosylated by diphtheria toxin
YDR418W	K.EILGTAQSVGCR.V	RPL12B	Yes	Yes	Yes	Protein component of the large (60S) ribosomal subunit, nearly identical to Rpl12Ap; rpl12a rpl12b double mutant exhibits slow growth and slow translation; has similarity to E. coli L11 and rat L12 ribosomal proteins
YDR432W	K.NLPEGCSWQDLK.D	NPL3	Yes	No	Yes	RNA-binding protein that carries poly(A)+ mRNA from the nucleus into the cytoplasm; dissociation from mRNAs is promoted by Mtr10p; phosphorylated by Sky1p in the cytoplasm
YDR447C	K.RLCDEIATIQSK.R	RPS17B	No	Yes	Yes	Ribosomal protein 51 (rp51) of the small (40s) subunit; nearly identical to Rps17Ap and has similarity to rat S17 ribosomal protein
YDR450W	R.RYSNLVCK.K	RPS18A	No	Yes	Yes	Protein component of the small (40S) ribosomal subunit; nearly identical to Rps18Bp and has similarity to E. coli S13 and rat S18 ribosomal proteins
YDR450W	R.YSNLVCK.K	RPS18A	Yes	Yes	Yes	Protein component of the small (40S) ribosomal subunit; nearly identical to Rps18Bp and has similarity to E. coli S13 and rat S18 ribosomal proteins
YDR477W	K.TSCGSPNYAAPEVISGK.L	SNF1	No	Yes	No	AMP-activated serine/threonine protein kinase found in a complex containing Snf4p and members of the Sip1p/Sip2p/Gal83p family; required for transcription of glucose-repressed genes, thermotolerance, sporulation, and peroxisome biogenesis
YDR487C	R.GHTEAGVDLCK.L	RIB3	Yes	No	No	3,4-dihydroxy-2-butanone-4-phosphate synthase (DHBP synthase), required for riboflavin biosynthesis from ribulose-5-phosphate, also has an unrelated function in mitochondrial respiration
YEL037C	K.LAQSISCEESQIK.L	RAD23	Yes	Yes	Yes	Protein with ubiquitin-like N terminus, recognizes and binds damaged DNA (with Rad4p) during nucleotide excision repair; regulates Rad4p levels, subunit of Nuclear Excision Repair Factor 2 (NEF2); homolog of human HR23A and HR23B proteins
YEL047C	K.ASSGINGACTETQR.H	YEL047C	Yes	Yes	Yes	Soluble fumarate reductase, required with isoenzyme Osm1p for anaerobic growth; may interact with ribosomes, based on co-purification experiments; authentic, non-tagged protein is detected in purified mitochondria in high-throughput studies
YEL060C	K.AITVGASTLSDDRAYFSNWGK.C	PRB1	No	Yes	No	Vacuolar proteinase B (yscB), a serine protease of the subtilisin family; involved in protein degradation in the vacuole and required for full protein degradation during sporulation
YEL060C	K.TIPLNDEDLDGNGHGTHCAGTIASK.H	PRB1	No	No	Yes	Vacuolar proteinase B (yscB), a serine protease of the subtilisin family; involved in protein degradation in the vacuole and required for full protein degradation during sporulation
YEL071W	K.VRDFDPVSGTFK.C	DLD3	Yes	Yes	Yes	D-lactate dehydrogenase, part of the retrograde regulon which consists of genes whose expression is stimulated by damage to mitochondria and reduced in cells grown with glutamate as the sole nitrogen source, located in the cytoplasm
YER025W	R.SFKSDKEISPK.C	GCD11	Yes	No	Yes	Gamma subunit of the translation initiation factor eIF2, involved in the identification of the start codon; binds GTP when forming the ternary complex with GTP and tRNAi-Met
YER043C	K.SKFDNLYGCR.E	SAH1	Yes	Yes	No	S-adenosyl-L-homocysteine hydrolase, catabolizes S-adenosyl-L-homocysteine which is formed after donation of the activated methyl group of S-adenosyl-L-methionine (AdoMet) to an acceptor
YER043C	K.VAVVAGYGDVGKGCAAALR.G	SAH1	Yes	Yes	Yes	S-adenosyl-L-homocysteine hydrolase, catabolizes S-adenosyl-L-homocysteine which is formed after donation of the activated methyl group of S-adenosyl-L-methionine (AdoMet) to an acceptor
YER062C	K.LCNALNALPK.E	HOR2	No	No	Yes	One of two redundant DL-glycerol-3-phosphatases (RHR2/GPP1 encodes the other) involved in glycerol biosynthesis; induced in response to hyperosmotic stress and oxidative stress, and during the diauxic transition
YER080W	K.IGPSVER.C	YER080W	Yes	Yes	Yes	Putative protein of unknown function; the authentic, non-tagged protein is detected in highly purified mitochondria in high-throughput studies; null mutant displays decreased frequency of mitochondrial genome loss (petite formation)
YER089C	K.SQNLLVCGNAGDSR.T	PTC2	Yes	Yes	No	Type 2C protein phosphatase; dephosphorylates Hog1p to limit maximal osmostress induced kinase activity; dephosphorylates Ire1p to downregulate the unfolded protein response; dephosphorylates Cdc28p; role in DNA checkpoint inactivation
YER091C	K.FWVNPDCGLK.T	MET6	No	Yes	No	Cobalamin-independent methionine synthase, involved in amino acid biosynthesis; requires a minimum of two glutamates on the methyltetrahydrofolate substrate, similar to bacterial metE homologs
YER091C	K.GMLTGPITCLR.W	MET6	Yes	Yes	No	Cobalamin-independent methionine synthase, involved in amino acid biosynthesis; requires a minimum of two glutamates on the methyltetrahydrofolate substrate, similar to bacterial metE homologs
YER110C	R.AYANASGCVAR.M	KAP123	Yes	Yes	Yes	Karyopherin beta, mediates nuclear import of ribosomal proteins prior to assembly into ribosomes and import of histones H3 and H4; localizes to the nuclear pore, nucleus, and cytoplasm; exhibits genetic interactions with RAI1
YER136W	K.APLVIADPTYFPEK.C	GDI1	Yes	Yes	Yes	GDP dissociation inhibitor, regulates vesicle traffic in secretory pathways by regulating the dissociation of GDP from the Sec4/Ypt/rab family of GTP binding proteins
YFL021W	K.SSTSVQSSATPPSNTSSNPDIK.C	GAT1	No	Yes	Yes	Transcriptional activator of genes involved in nitrogen catabolite repression; contains a GATA-1-type zinc finger DNA-binding motif; activity and localization regulated by nitrogen limitation and Ure2p
YFL039C	K.QEYDESGPSIVHHK.C	ACT1	Yes	Yes	Yes	Actin, structural protein involved in cell polarization, endocytosis, and other cytoskeletal functions
YFL039C	R.FRAPEALFHPSVLGLESAGIDQTTYNSIMK.C	ACT1	No	Yes	Yes	Actin, structural protein involved in cell polarization, endocytosis, and other cytoskeletal functions
YFR006W	R.QYTSDITR.C	YFR006W	Yes	Yes	No	Putative X-Pro aminopeptidase; green fluorescent protein (GFP)-fusion protein localizes to the cytoplasm; YFR006W is not an essential gene
YGL006W	K.NLSFLDK.C	PMC1	No	No	Yes	Vacuolar Ca2+ ATPase involved in depleting cytosol of Ca2+ ions; prevents growth inhibition by activation of calcineurin in the presence of elevated concentrations of calcium; similar to mammalian PMCA1a
YGL008C	K.KVTAVVESPEGERIVCVK.G	PMA1	Yes	Yes	Yes	Plasma membrane H+-ATPase, pumps protons out of the cell; major regulator of cytoplasmic pH and plasma membrane potential; part of the P2 subgroup of cation-transporting ATPases
YGL019W	R.QYPSTEEDWEEFAK.C	CKB1	Yes	Yes	Yes	Beta regulatory subunit of casein kinase 2, a Ser/Thr protein kinase with roles in cell growth and proliferation; the holoenzyme also contains CKA1, CKA2 and CKB2, the many substrates include transcription factors and all RNA polymerases
YGL026C	K.IVTLCGDAPEGK.R	TRP5	Yes	No	No	Tryptophan synthase involved in tryptophan biosynthesis, regulated by the general control system of amino acid biosynthesis
YGL026C	K.NVIAETGAGQHGVATATACAK.F	TRP5	Yes	No	Yes	Tryptophan synthase involved in tryptophan biosynthesis, regulated by the general control system of amino acid biosynthesis
YGL043W	K.IANGDITPEFLATCDAK.D	DST1	Yes	No	Yes	General transcription elongation factor TFIIS, enables RNA polymerase II to read through blocks to elongation by stimulating cleavage of nascent transcripts stalled at transcription arrest sites
YGL049C	K.LVLHYLVAR.C	TIF4632	Yes	Yes	No	Translation initiation factor eIF4G, subunit of the mRNA cap-binding protein complex (eIF4F) that also contains eIF4E (Cdc33p); associates with the poly(A)-binding protein Pab1p, also interacts with eIF4A (Tif1p); homologous to Tif4631p
YGL135W	K.SCGVDAMSVDDLK.K	RPL1B	Yes	Yes	Yes	N-terminally acetylated protein component of the large (60S) ribosomal subunit, nearly identical to Rpl1Ap and has similarity to E. coli L1 and rat L10a ribosomal proteins; rpl1a rpl1b double null mutation is lethal
YGL135W	K.SCGVDAMSVDDLKK.L	RPL1B	Yes	Yes	Yes	N-terminally acetylated protein component of the large (60S) ribosomal subunit, nearly identical to Rpl1Ap and has similarity to E. coli L1 and rat L10a ribosomal proteins; rpl1a rpl1b double null mutation is lethal
YGL234W	K.DAPGCVIENGTK.L	ADE5	Yes	Yes	Yes	Bifunctional enzyme of the 'de novo' purine nucleotide biosynthetic pathway, contains aminoimidazole ribotide synthetase and glycinamide ribotide synthetase activities
YGL234W	K.DAPGCVIENGTKLY.-	ADE5	Yes	No	No	Bifunctional enzyme of the 'de novo' purine nucleotide biosynthetic pathway, contains aminoimidazole ribotide synthetase and glycinamide ribotide synthetase activities
YGL234W	R.TAVDTVYEAVK.C	ADE5	Yes	Yes	Yes	Bifunctional enzyme of the 'de novo' purine nucleotide biosynthetic pathway, contains aminoimidazole ribotide synthetase and glycinamide ribotide synthetase activities
YGL245W	K.AYCDDTPTEK.M	GUS1	Yes	Yes	Yes	Glutamyl-tRNA synthetase (GluRS), forms a complex with methionyl-tRNA synthetase (Mes1p) and Arc1p; complex formation increases the catalytic efficiency of both tRNA synthetases and ensures their correct localization to the cytoplasm
YGL253W	K.LSDDIPPSAPMAINCEYGSFDNEHVVLPR.T	HXK2	No	Yes	Yes	Hexokinase isoenzyme 2 that catalyzes phosphorylation of glucose in the cytosol; predominant hexokinase during growth on glucose; functions in the nucleus to repress expression of HXK1 and GLK1 and to induce expression of its own gene
YGR061C	K.ATNIAHVCGLQDK.V	ADE6	Yes	No	No	Formylglycinamidine-ribonucleotide (FGAM)-synthetase, catalyzes a step in the 'de novo' purine nucleotide biosynthetic pathway
YGR061C	K.TVPGFPLLENLNDISLK.C	ADE6	Yes	Yes	No	Formylglycinamidine-ribonucleotide (FGAM)-synthetase, catalyzes a step in the 'de novo' purine nucleotide biosynthetic pathway
YGR094W	K.ESYPNGIPQCGTDAMR.F	VAS1	Yes	Yes	Yes	Mitochondrial and cytoplasmic valyl-tRNA synthetase
YGR094W	K.NLYVGQEDNEMTIPTCSR.S	VAS1	Yes	Yes	Yes	Mitochondrial and cytoplasmic valyl-tRNA synthetase
YGR124W	K.ADWGCAEDPSGR.Y	ASN2	Yes	Yes	Yes	Asparagine synthetase, isozyme of Asn1p; catalyzes the synthesis of L-asparagine from L-aspartate in the asparagine biosynthetic pathway
YGR124W	K.NLHLADCLR.A	ASN2	Yes	No	Yes	Asparagine synthetase, isozyme of Asn1p; catalyzes the synthesis of L-asparagine from L-aspartate in the asparagine biosynthetic pathway
YGR124W	R.SSQSPETVYFASELK.C	ASN2	Yes	Yes	Yes	Asparagine synthetase, isozyme of Asn1p; catalyzes the synthesis of L-asparagine from L-aspartate in the asparagine biosynthetic pathway
YGR159C	K.EIDGRPINCDMSTSKPAGNNDR.A	NSR1	Yes	Yes	Yes	Nucleolar protein that binds nuclear localization sequences, required for pre-rRNA processing and ribosome biogenesis
YGR192C	K.IVSNASCTTNCLAPLAK.V	TDH3	Yes	Yes	Yes	Glyceraldehyde-3-phosphate dehydrogenase, isozyme 3, involved in glycolysis and gluconeogenesis; tetramer that catalyzes the reaction of glyceraldehyde-3-phosphate to 1,3 bis-phosphoglycerate; detected in the cytoplasm and cell-wall
YGR240C	-.MQSQDSCYGVAFR.S	PFK1	Yes	Yes	Yes	Alpha subunit of heterooctameric phosphofructokinase involved in glycolysis, indispensable for anaerobic growth, activated by fructose-2,6-bisphosphate and AMP, mutation inhibits glucose induction of cell cycle-related genes
YGR254W	K.IGLDCASSEFFK.D	ENO1	Yes	Yes	Yes	Enolase I, a phosphopyruvate hydratase that catalyzes the conversion of 2-phosphoglycerate to phosphoenolpyruvate during glycolysis and the reverse reaction during gluconeogenesis; expression is repressed in response to glucose
YGR279C	R.GITYTPYESSGACK.S	SCW4	Yes	Yes	Yes	Cell wall protein with similarity to glucanases; scw4 scw10 double mutants exhibit defects in mating
YGR279C	R.LYGTDCNQVENVFK.A	SCW4	Yes	Yes	Yes	Cell wall protein with similarity to glucanases; scw4 scw10 double mutants exhibit defects in mating
YGR285C	R.AQYDSCDFVADVPPPK.K	ZUO1	Yes	No	No	Cytosolic ribosome-associated chaperone that acts, together with Ssz1p and the Ssb proteins, as a chaperone for nascent polypeptide chains; contains a DnaJ domain and functions as a J-protein partner for Ssb1p and Ssb2p
YHL001W	K.WAAAGVCEK.W	RPL14B	Yes	Yes	Yes	Protein component of the large (60S) ribosomal subunit, nearly identical to Rpl14Ap and has similarity to rat L14 ribosomal protein
YHR003C	R.VSINDISMTEFDPISR.C	YHR003C	No	Yes	No	Protein of unknown function, localized to the mitochondrial outer membrane
YHR007C	K.GVIYDCPNSR.L	ERG11	Yes	No	Yes	Lanosterol 14-alpha-demethylase, catalyzes the C-14 demethylation of lanosterol to form 4,4''-dimethyl cholesta-8,14,24-triene-3-beta-ol in the ergosterol biosynthesis pathway; member of the cytochrome P450 family
YHR019C	K.YGTCPHGGYGIGTER.I	DED81	Yes	Yes	Yes	Cytosolic asparaginyl-tRNA synthetase, required for protein synthesis, catalyzes the specific attachment of asparagine to its cognate tRNA
YHR020W	K.FAGGDFTTTCEGYIPQTGR.G	YHR020W	No	Yes	Yes	Protein of unknown function that may interact with ribosomes, based on co-purification experiments; has similarity to proline-tRNA ligase; YHR020W is an essential gene
YHR021C	R.SYFLDVK.C	RPS27B	No	No	Yes	Protein component of the small (40S) ribosomal subunit; nearly identical to Rps27Ap and has similarity to rat S27 ribosomal protein
YHR025W	K.YQWNPAIK.C	THR1	Yes	Yes	Yes	Homoserine kinase, conserved protein required for threonine biosynthesis; expression is regulated by the GCN4-mediated general amino acid control pathway
YHR068W	K.HGADCLEANQDVDSPIWTPSK.M	DYS1	Yes	Yes	Yes	Deoxyhypusine synthase, catalyzes formation of deoxyhypusine, the first step in hypusine biosynthesis; triggers posttranslational hypusination of translation elongation factor eIF-5A and regulates its intracellular levels; tetrameric
YHR068W	K.KGCFDEEGYQK.T	DYS1	Yes	Yes	No	Deoxyhypusine synthase, catalyzes formation of deoxyhypusine, the first step in hypusine biosynthesis; triggers posttranslational hypusination of translation elongation factor eIF-5A and regulates its intracellular levels; tetrameric
YHR068W	K.MVDAVVTSAGGVEEDLIK.C	DYS1	Yes	Yes	Yes	Deoxyhypusine synthase, catalyzes formation of deoxyhypusine, the first step in hypusine biosynthesis; triggers posttranslational hypusination of translation elongation factor eIF-5A and regulates its intracellular levels; tetrameric
YHR104W	R.LFDGACDYGNEK.E	GRE3	Yes	Yes	Yes	Aldose reductase involved in methylglyoxal, d-xylose and arabinose metabolism; stress induced (osmotic, ionic, oxidative, heat shock, starvation and heavy metals); regulated by the HOG pathway
YHR183W	R.VLPECASDNLPVDK.D	GND1	Yes	Yes	Yes	6-phosphogluconate dehydrogenase (decarboxylating), catalyzes an NADPH regenerating reaction in the pentose phosphate pathway; required for growth on D-glucono-delta-lactone and adaptation to oxidative stress
YHR203C	K.LSGCYAPRPSAGPHK.L	RPS4B	Yes	Yes	Yes	Protein component of the small (40S) ribosomal subunit; identical to Rps4Ap and has similarity to rat S4 ribosomal protein
YIL078W	K.NSSCYFLGDATNDSLQR.V	THS1	Yes	No	Yes	Threonyl-tRNA synthetase, essential cytoplasmic protein
YIL078W	K.VPDGGATTVYR.C	THS1	Yes	Yes	Yes	Threonyl-tRNA synthetase, essential cytoplasmic protein
YIL116W	K.IYNLEPYR.C	HIS5	Yes	Yes	No	Histidinol-phosphate aminotransferase, catalyzes the seventh step in histidine biosynthesis; responsive to general control of amino acid biosynthesis; mutations cause histidine auxotrophy and sensitivity to Cu, Co, and Ni salts
YIL125W	R.YCGRNPSGAVAAGSK.S	KGD1	No	No	Yes	Component of the mitochondrial alpha-ketoglutarate dehydrogenase complex, which catalyzes a key step in the tricarboxylic acid (TCA) cycle, the oxidative decarboxylation of alpha-ketoglutarate to form succinyl-CoA
YIL142W	K.LLQSASSNTCMVTNDGATILK.S	CCT2	No	Yes	Yes	Subunit beta of the cytosolic chaperonin Cct ring complex, related to Tcp1p, required for the assembly of actin and tubulins in vivo
YIR033W	K.SLNINSNISICDSLGR.T	MGA2	No	Yes	No	ER membrane protein involved in regulation of OLE1 transcription, acts with homolog Spt23p; inactive ER form dimerizes and one subunit is then activated by ubiquitin/proteasome-dependent processing followed by nuclear targeting
YJL080C	K.FACQIDIPNEENNNASK.D	SCP160	Yes	Yes	No	Essential RNA-binding G protein effector of mating response pathway, mainly associated with nuclear envelope and ER, interacts in mRNA-dependent manner with translating ribosomes via multiple KH domains, similar to vertebrate vigilins
YJL080C	K.KLTKPINAVIEVPSK.C	SCP160	Yes	Yes	No	Essential RNA-binding G protein effector of mating response pathway, mainly associated with nuclear envelope and ER, interacts in mRNA-dependent manner with translating ribosomes via multiple KH domains, similar to vertebrate vigilins
YJL080C	K.LTKPINAVIEVPSK.C	SCP160	Yes	Yes	Yes	Essential RNA-binding G protein effector of mating response pathway, mainly associated with nuclear envelope and ER, interacts in mRNA-dependent manner with translating ribosomes via multiple KH domains, similar to vertebrate vigilins
YJL121C	K.WVDDFAK.C	RPE1	Yes	Yes	Yes	D-ribulose-5-phosphate 3-epimerase, catalyzes a reaction in the non-oxidative part of the pentose-phosphate pathway; mutants are sensitive to oxidative stress
YJL130C	K.VLGTPIDTIITTEDRELFSNAIDEINEK.C	URA2	No	Yes	No	Bifunctional carbamoylphosphate synthetase (CPSase)-aspartate transcarbamylase (ATCase), catalyzes the first two enzymatic steps in the de novo biosynthesis of pyrimidines; both activities are subject to feedback inhibition by UTP
YJL130C	R.GHNIPCTSTISGR.C	URA2	No	No	Yes	Bifunctional carbamoylphosphate synthetase (CPSase)-aspartate transcarbamylase (ATCase), catalyzes the first two enzymatic steps in the de novo biosynthesis of pyrimidines; both activities are subject to feedback inhibition by UTP
YJL130C	R.LAVDYSVPLVTNVK.C	URA2	Yes	No	No	Bifunctional carbamoylphosphate synthetase (CPSase)-aspartate transcarbamylase (ATCase), catalyzes the first two enzymatic steps in the de novo biosynthesis of pyrimidines; both activities are subject to feedback inhibition by UTP
YJL167W	K.IGTDIQDNK.C	ERG20	Yes	Yes	Yes	Farnesyl pyrophosphate synthetase, has both dimethylallyltranstransferase and geranyltranstransferase activities; catalyzes the formation of C15 farnesyl pyrophosphate units for isoprenoid and sterol biosynthesis
YJL167W	K.TLDENYGKKDSVAEAK.C	ERG20	Yes	Yes	Yes	Farnesyl pyrophosphate synthetase, has both dimethylallyltranstransferase and geranyltranstransferase activities; catalyzes the formation of C15 farnesyl pyrophosphate units for isoprenoid and sterol biosynthesis
YJL172W	K.TILGAPFCPR.R	CPS1	Yes	No	No	Vacuolar carboxypeptidase yscS; expression is induced under low-nitrogen conditions
YJR007W	R.VSSEDIIKCEEK.Y	SUI2	Yes	No	No	Alpha subunit of the translation initiation factor eIF2, involved in the identification of the start codon; phosphorylation of Ser51 is required for regulation of translation by inhibiting the exchange of GDP for GTP
YJR016C	K.LAECDNIGEYIK.K	ILV3	Yes	Yes	Yes	Dihydroxyacid dehydratase, catalyzes third step in the common pathway leading to biosynthesis of branched-chain amino acids
YJR016C	K.LAECDNIGEYIKK.T	ILV3	No	No	Yes	Dihydroxyacid dehydratase, catalyzes third step in the common pathway leading to biosynthesis of branched-chain amino acids
YJR064W	K.DFSHPQMPK.C	CCT5	No	Yes	No	Subunit of the cytosolic chaperonin Cct ring complex, related to Tcp1p, required for the assembly of actin and tubulins in vivo
YJR105W	K.CAALITGHNR.S	ADO1	No	Yes	No	Adenosine kinase, required for the utilization of S-adenosylmethionine (AdoMet); may be involved in recycling adenosine produced through the methyl cycle
YJR105W	K.SMYQVQNDIGTGK.C	ADO1	Yes	Yes	Yes	Adenosine kinase, required for the utilization of S-adenosylmethionine (AdoMet); may be involved in recycling adenosine produced through the methyl cycle
YJR109C	K.LYDNGCNIMGTNPNDIDRAENR.H	CPA2	No	Yes	No	Large subunit of carbamoyl phosphate synthetase, which catalyzes a step in the synthesis of citrulline, an arginine precursor
YJR123W	K.AQCPIIER.L	RPS5	Yes	Yes	Yes	Protein component of the small (40S) ribosomal subunit, the least basic of the non-acidic ribosomal proteins; phosphorylated in vivo; essential for viability; has similarity to E. coli S7 and rat S5 ribosomal proteins
YKL035W	K.LNGGLGTSMGCVGPK.S	UGP1	Yes	Yes	Yes	UDP-glucose pyrophosphorylase (UGPase), catalyses the reversible formation of UDP-Glc from glucose 1-phosphate and UTP, involved in a wide variety of metabolic pathways, expression modulated by Pho85p through Pho4p
YKL035W	K.TCSDLLLVK.S	UGP1	No	No	Yes	UDP-glucose pyrophosphorylase (UGPase), catalyses the reversible formation of UDP-Glc from glucose 1-phosphate and UTP, involved in a wide variety of metabolic pathways, expression modulated by Pho85p through Pho4p
YKL060C	K.EHGEPLFSSHMLDLSEETDEENISTCVK.Y	FBA1	Yes	No	No	Fructose 1,6-bisphosphate aldolase, required for glycolysis and gluconeogenesis; catalyzes conversion of fructose 1,6 bisphosphate to glyceraldehyde-3-P and dihydroxyacetone-P; locates to mitochondrial outer surface upon oxidative stress
YKL060C	K.VNLDTDCQYAYLTGIR.D	FBA1	Yes	Yes	Yes	Fructose 1,6-bisphosphate aldolase, required for glycolysis and gluconeogenesis; catalyzes conversion of fructose 1,6 bisphosphate to glyceraldehyde-3-P and dihydroxyacetone-P; locates to mitochondrial outer surface upon oxidative stress
YKL060C	R.EQVGCKEEKPLFLVFHGGSGSTVQEFHTGIDNGVVK.V	FBA1	Yes	No	No	Fructose 1,6-bisphosphate aldolase, required for glycolysis and gluconeogenesis; catalyzes conversion of fructose 1,6 bisphosphate to glyceraldehyde-3-P and dihydroxyacetone-P; locates to mitochondrial outer surface upon oxidative stress
YKL060C	R.SIAPAYGIPVVLHSDHCAK.K	FBA1	Yes	Yes	Yes	Fructose 1,6-bisphosphate aldolase, required for glycolysis and gluconeogenesis; catalyzes conversion of fructose 1,6 bisphosphate to glyceraldehyde-3-P and dihydroxyacetone-P; locates to mitochondrial outer surface upon oxidative stress
YKL067W	R.NVCHGSDSVDSAER.E	YNK1	Yes	No	Yes	Nucleoside diphosphate kinase, catalyzes the transfer of gamma phosphates from nucleoside triphosphates, usually ATP, to nucleoside diphosphates by a mechanism that involves formation of an autophosphorylated enzyme intermediate
YKL081W	K.DVDACFVK.I	TEF4	Yes	Yes	Yes	Translation elongation factor EF-1 gamma
YKL085W	K.IHPIGELSSEEEEMLQK.C	MDH1	Yes	Yes	Yes	Mitochondrial malate dehydrogenase, catalyzes interconversion of malate and oxaloacetate; involved in the tricarboxylic acid (TCA) cycle; phosphorylated
YKL182W	K.EVYDFTHAVGNNCEDFVSRPDR.T	FAS1	Yes	Yes	No	Beta subunit of fatty acid synthetase, which catalyzes the synthesis of long-chain saturated fatty acids; contains acetyltransacylase, dehydratase, enoyl reductase, malonyl transacylase, and palmitoyl transacylase activities
YKL182W	K.NANIFSSVK.C	FAS1	Yes	Yes	Yes	Beta subunit of fatty acid synthetase, which catalyzes the synthesis of long-chain saturated fatty acids; contains acetyltransacylase, dehydratase, enoyl reductase, malonyl transacylase, and palmitoyl transacylase activities
YKR080W	K.HHVEDLGEYSEDLLKK.C	MTD1	Yes	No	Yes	NAD-dependent 5,10-methylenetetrahydrafolate dehydrogenase, plays a catalytic role in oxidation of cytoplasmic one-carbon units; expression is regulated by Bas1p and Bas2p, repressed by adenine, and may be induced by inositol and choline
YLL026W	K.SNPCLIGEPGIGK.T	HSP104	Yes	Yes	Yes	Heat shock protein that cooperates with Ydj1p (Hsp40) and Ssa1p (Hsp70) to refold and reactivate previously denatured, aggregated proteins; responsive to stresses including: heat, ethanol, and sodium arsenite; involved in [PSI+] propagation
YLR022C	K.GLVANKEDLQK.C	SDO1	Yes	Yes	Yes	Essential protein involved in 60S ribosome maturation; ortholog of the human protein (SBDS) responsible for autosomal recessive Shwachman-Bodian-Diamond Syndrome; highly conserved across archae and eukaryotes
YLR028C	K.YTQSNSVCYAK.N	ADE16	No	Yes	Yes	Enzyme of 'de novo' purine biosynthesis containing both 5-aminoimidazole-4-carboxamide ribonucleotide transformylase and inosine monophosphate cyclohydrolase activities, isozyme of Ade17p; ade16 ade17 mutants require adenine and histidine
YLR029C	R.YNWICDPVHK.H	RPL15A	Yes	Yes	Yes	Protein component of the large (60S) ribosomal subunit, nearly identical to Rpl15Bp and has similarity to rat L15 ribosomal protein; binds to 5.8 S rRNA
YLR044C	K.NPVILADACCSR.H	PDC1	Yes	Yes	No	Major of three pyruvate decarboxylase isozymes, key enzyme in alcoholic fermentation, decarboxylates pyruvate to acetaldehyde; subject to glucose-, ethanol-, and autoregulation; involved in amino acid catabolism
YLR044C	R.MSANISETTAMITDIATAPAEIDR.C	PDC1	No	Yes	Yes	Major of three pyruvate decarboxylase isozymes, key enzyme in alcoholic fermentation, decarboxylates pyruvate to acetaldehyde; subject to glucose-, ethanol-, and autoregulation; involved in amino acid catabolism
YLR058C	R.MEILCQQR.A	SHM2	Yes	Yes	Yes	Cytosolic serine hydroxymethyltransferase, converts serine to glycine plus 5,10 methylenetetrahydrofolate; major isoform involved in generating precursors for purine, pyrimidine, amino acid, and lipid biosynthesis
YLR058C	R.VEYICEK.I	SHM2	Yes	Yes	Yes	Cytosolic serine hydroxymethyltransferase, converts serine to glycine plus 5,10 methylenetetrahydrofolate; major isoform involved in generating precursors for purine, pyrimidine, amino acid, and lipid biosynthesis
YLR058C	R.YYGGNEHIDRMEILCQQR.A	SHM2	Yes	Yes	Yes	Cytosolic serine hydroxymethyltransferase, converts serine to glycine plus 5,10 methylenetetrahydrofolate; major isoform involved in generating precursors for purine, pyrimidine, amino acid, and lipid biosynthesis
YLR060W	R.VCSLPPLINSEHSK.I	FRS1	No	Yes	No	Beta subunit of cytoplasmic phenylalanyl-tRNA synthetase, forms a tetramer with Frs2p to generate active enzyme; sequence is evolutionarily distant from mitochondrial phenylalanyl-tRNA synthetase (Msf1p), but substrate binding is similar
YLR060W	R.YCDEPFTVEPVEIVSEHNGQSR.L	FRS1	Yes	Yes	Yes	Beta subunit of cytoplasmic phenylalanyl-tRNA synthetase, forms a tetramer with Frs2p to generate active enzyme; sequence is evolutionarily distant from mitochondrial phenylalanyl-tRNA synthetase (Msf1p), but substrate binding is similar
YLR075W	K.MLSCAGADR.L	RPL10	Yes	Yes	Yes	Protein component of the large (60S) ribosomal subunit, responsible for joining the 40S and 60S subunits; regulates translation initiation; has similarity to rat L10 ribosomal protein and to members of the QM gene family
YLR075W	K.MLSCAGADRLQQGMR.G	RPL10	Yes	Yes	Yes	Protein component of the large (60S) ribosomal subunit, responsible for joining the 40S and 60S subunits; regulates translation initiation; has similarity to rat L10 ribosomal protein and to members of the QM gene family
YLR089C	K.LLESTGICTVPGSGFGQEPGTYHLR.T	ALT1	Yes	No	No	Putative alanine transaminase (glutamic pyruvic transaminase); the authentic, non-tagged protein is detected in highly purified mitochondria in high-throughput studies
YLR109W	K.FASDPGCAFTK.S	AHP1	Yes	Yes	Yes	Thiol-specific peroxiredoxin, reduces hydroperoxides to protect against oxidative damage; function in vivo requires covalent conjugation to Urm1p
YLR109W	K.FQYIAISQSDADSESCK.M	AHP1	Yes	Yes	Yes	Thiol-specific peroxiredoxin, reduces hydroperoxides to protect against oxidative damage; function in vivo requires covalent conjugation to Urm1p
YLR109W	K.FQYIAISQSDADSESCKMPQTVEWSK.L	AHP1	No	Yes	No	Thiol-specific peroxiredoxin, reduces hydroperoxides to protect against oxidative damage; function in vivo requires covalent conjugation to Urm1p
YLR153C	K.LNASYNCVDR.H	ACS2	No	No	Yes	Acetyl-coA synthetase isoform which, along with Acs1p, is the nuclear source of acetyl-coA for histone acetylation; mutants affect global transcription; required for growth on glucose; expressed under anaerobic conditions
YLR197W	R.QLYDYLCEK.M	SIK1	Yes	Yes	Yes	Essential evolutionarily-conserved nucleolar protein component of the box C/D snoRNP complexes that direct 2'-O-methylation of pre-rRNA during its maturation; overexpression causes spindle orientation defects
YLR216C	R.LIENQQCDQENNKPLR.D	CPR6	Yes	No	Yes	Peptidyl-prolyl cis-trans isomerase (cyclophilin), catalyzes the cis-trans isomerization of peptide bonds N-terminal to proline residues; binds to Hsp82p and contributes to chaperone activity
YLR216C	R.LIENQQCDQENNKPLRDVK.I	CPR6	Yes	Yes	No	Peptidyl-prolyl cis-trans isomerase (cyclophilin), catalyzes the cis-trans isomerization of peptide bonds N-terminal to proline residues; binds to Hsp82p and contributes to chaperone activity
YLR249W	K.EIEEHCSMLGLDPEIVSHSR.I	YEF3	Yes	Yes	No	Translational elongation factor 3, stimulates the binding of aminoacyl-tRNA (AA-tRNA) to ribosomes by releasing EF-1 alpha from the ribosomal complex; contains two ABC cassettes; binds and hydrolyses ATP
YLR249W	K.GNFTEFVKK.C	YEF3	Yes	No	No	Translational elongation factor 3, stimulates the binding of aminoacyl-tRNA (AA-tRNA) to ribosomes by releasing EF-1 alpha from the ribosomal complex; contains two ABC cassettes; binds and hydrolyses ATP
YLR249W	K.SAVIIDNMCK.L	YEF3	Yes	Yes	Yes	Translational elongation factor 3, stimulates the binding of aminoacyl-tRNA (AA-tRNA) to ribosomes by releasing EF-1 alpha from the ribosomal complex; contains two ABC cassettes; binds and hydrolyses ATP
YLR249W	K.VTNMEFQYPGTSKPQITDINFQCSLSSR.I	YEF3	No	No	Yes	Translational elongation factor 3, stimulates the binding of aminoacyl-tRNA (AA-tRNA) to ribosomes by releasing EF-1 alpha from the ribosomal complex; contains two ABC cassettes; binds and hydrolyses ATP
YLR249W	K.YKGNFTEFVKK.C	YEF3	No	No	Yes	Translational elongation factor 3, stimulates the binding of aminoacyl-tRNA (AA-tRNA) to ribosomes by releasing EF-1 alpha from the ribosomal complex; contains two ABC cassettes; binds and hydrolyses ATP
YLR249W	R.AIANGQVDGFPTQEECR.T	YEF3	Yes	Yes	Yes	Translational elongation factor 3, stimulates the binding of aminoacyl-tRNA (AA-tRNA) to ribosomes by releasing EF-1 alpha from the ribosomal complex; contains two ABC cassettes; binds and hydrolyses ATP
YLR249W	R.KEIEEHCSMLGLDPEIVSHSR.I	YEF3	No	Yes	No	Translational elongation factor 3, stimulates the binding of aminoacyl-tRNA (AA-tRNA) to ribosomes by releasing EF-1 alpha from the ribosomal complex; contains two ABC cassettes; binds and hydrolyses ATP
YLR259C	K.NVAAGCNPMDLR.R	HSP60	No	No	Yes	Tetradecameric mitochondrial chaperonin required for ATP-dependent folding of precursor polypeptides and complex assembly; prevents aggregation and mediates protein refolding after heat shock; role in mtDNA transmission; phosphorylated
YLR300W	R.KYPNQCGTISN.-	EXG1	No	Yes	Yes	Major exo-1,3-beta-glucanase of the cell wall, involved in cell wall beta-glucan assembly; exists as three differentially glycosylated isoenzymes
YLR301W	K.NWDSGCVEETGAVYPFGADK.E	YLR301W	Yes	Yes	Yes	Protein of unknown function that interacts with Sec72p
YLR304C	R.VGLIGSCTNSSYEDMSR.S	ACO1	Yes	Yes	Yes	Aconitase, required for the tricarboxylic acid (TCA) cycle and also independently required for mitochondrial genome maintenance; phosphorylated; component of the mitochondrial nucleoid; mutation leads to glutamate auxotrophy
YLR314C	K.FMQSVYEK.C	CDC3	Yes	Yes	No	Component of the septin ring of the mother-bud neck that is required for cytokinesis; septins recruit proteins to the neck and can act as a barrier to diffusion at the membrane, and they comprise the 10nm filaments seen with EM
YLR355C	K.YGMDYMYDACSTTAR.R	ILV5	Yes	Yes	Yes	Acetohydroxyacid reductoisomerase, mitochondrial protein involved in branched-chain amino acid biosynthesis, also required for maintenance of wild-type mitochondrial DNA and found in mitochondrial nucleoids
YLR388W	K.YGLNICR.Q	RPS29A	Yes	Yes	Yes	Protein component of the small (40S) ribosomal subunit; nearly identical to Rps29Bp and has similarity to rat S29 and E. coli S14 ribosomal proteins
YLR388W	R.KYGLNICR.Q	RPS29A	No	Yes	No	Protein component of the small (40S) ribosomal subunit; nearly identical to Rps29Bp and has similarity to rat S29 and E. coli S14 ribosomal proteins
YLR388W	R.VCSSHTGLIR.K	RPS29A	No	No	Yes	Protein component of the small (40S) ribosomal subunit; nearly identical to Rps29Bp and has similarity to rat S29 and E. coli S14 ribosomal proteins
YLR420W	K.IILEHCTSESAIK.T	URA4	No	Yes	No	Dihydroorotase, catalyzes the third enzymatic step in the de novo biosynthesis of pyrimidines, converting carbamoyl-L-aspartate into dihydroorotate
YLR441C	R.VVEVCLADLQGSEDHSFR.K	RPS1A	No	No	Yes	Ribosomal protein 10 (rp10) of the small (40S) subunit; nearly identical to Rps1Bp and has similarity to rat S3a ribosomal protein
YML008C	K.VYAIEATCHAPK.L	ERG6	Yes	No	No	Delta(24)-sterol C-methyltransferase, converts zymosterol to fecosterol in the ergosterol biosynthetic pathway by methylating position C-24; localized to both lipid particles and mitochondrial outer membrane
YML008C	R.FTGCNVIGLNNNDYQIAK.A	ERG6	Yes	Yes	Yes	Delta(24)-sterol C-methyltransferase, converts zymosterol to fecosterol in the ergosterol biosynthetic pathway by methylating position C-24; localized to both lipid particles and mitochondrial outer membrane
YML028W	K.NGTVLPCNWTPGAATIKPTVEDSK.E	TSA1	No	Yes	No	Thioredoxin peroxidase, acts as both a ribosome-associated and free cytoplasmic antioxidant; self-associates to form a high-molecular weight chaperone complex under oxidative stress; deletion results in mutator phenotype
YML070W	K.SEPHITELDNQVGDGDCGYTLVAGVK.G	DAK1	Yes	No	Yes	Dihydroxyacetone kinase, required for detoxification of dihydroxyacetone (DHA); involved in stress adaptation
YML072C	K.ANNDGVAVFDEECSFK.A	TCB3	Yes	Yes	Yes	Lipid-binding protein, localized to the bud via specific mRNA transport; non-tagged protein detected in a phosphorylated state in mitochondria; GFP-fusion protein localizes to the cell periphery; C-termini of Tcb1p, Tcb2p and Tcb3p interact
YML126C	K.YFDYNVFHVPTCK.L	ERG13	Yes	Yes	No	3-hydroxy-3-methylglutaryl-CoA (HMG-CoA) synthase, catalyzes the formation of HMG-CoA from acetyl-CoA and acetoacetyl-CoA; involved in the second step in mevalonate biosynthesis
YMR083W	K.YSGVCHTDLHAWHGDWPLPVK.L	ADH3	No	No	Yes	Mitochondrial alcohol dehydrogenase isozyme III; involved in the shuttling of mitochondrial NADH to the cytosol under anaerobic conditions and ethanol production
YMR092C	R.NFTTHLSYDPTTNAIAYPCGK.S	AIP1	Yes	Yes	No	Actin cortical patch component, interacts with the actin depolymerizing factor cofilin; required to restrict cofilin localization to cortical patches; contains WD repeats
YMR120C	K.YTQSNSVCYAR.N	ADE17	Yes	Yes	Yes	Enzyme of 'de novo' purine biosynthesis containing both 5-aminoimidazole-4-carboxamide ribonucleotide transformylase and inosine monophosphate cyclohydrolase activities, isozyme of Ade16p; ade16 ade17 mutants require adenine and histidine
YMR146C	K.KYETDCPLNTAVITPLK.E	TIF34	No	No	Yes	Subunit of the core complex of translation initiation factor 3(eIF3), which is essential for translation
YMR189W	K.TFSIPHGGGGPAGAPICVK.S	GCV2	No	Yes	No	P subunit of the mitochondrial glycine decarboxylase complex, required for the catabolism of glycine to 5,10-methylene-THF; expression is regulated by levels of 5,10-methylene-THF in the cytoplasm
YMR200W	R.QLFSDPCNDDGVSTYSR.Y	ROT1	No	Yes	No	Essential ER membrane protein; may be involved in protein folding; mutation causes defects in cell wall synthesis and in lysis of autophagic bodies, suppresses tor2 mutations, and is synthetically lethal with kar2-1 and with rot2 mutations
YMR205C	R.GWSAEGGTNIGTAR.C	PFK2	Yes	Yes	Yes	Beta subunit of heterooctameric phosphofructokinase involved in glycolysis, indispensable for anaerobic growth, activated by fructose-2,6-bisphosphate and AMP, mutation inhibits glucose induction of cell cycle-related genes
YMR215W	K.ESEISSDSIYK.C	GAS3	No	Yes	Yes	Putative 1,3-beta-glucanosyltransferase, has similarity to Gas1p; localizes to the cell wall
YMR215W	R.IYSLNPDLNHDK.C	GAS3	No	Yes	Yes	Putative 1,3-beta-glucanosyltransferase, has similarity to Gas1p; localizes to the cell wall
YMR217W	K.NFAVDLCHAK.Q	GUA1	No	Yes	Yes	GMP synthase, an enzyme that catalyzes the second step in the biosynthesis of GMP from inosine 5'-phosphate (IMP); transcription is not subject to regulation by guanine but is negatively regulated by nutrient starvation
YMR222C	K.VQGLYNSCTEDSR.T	FSH2	Yes	Yes	Yes	Serine hydrolase that localizes to the cytoplasm; sequence is similar to Fsh1p and Fsh3p
YMR246W	R.SNPYVQNICVYADENK.V	FAA4	No	No	Yes	Long chain fatty acyl-CoA synthetase, regulates protein modification during growth in the presence of ethanol, functions to incorporate palmitic acid into phospholipids and neutral lipids
YMR260C	R.DFQDDQCDVVHK.Y	TIF11	Yes	No	Yes	Translation initiation factor eIF1A, essential protein that forms a complex with Sui1p (eIF1) and the 40S ribosomal subunit and scans for the start codon; C-terminus associates with Fun12p (eIF5B); N terminus interacts with eIF2 and eIF3
YMR260C	R.VEASCFDGNK.R	TIF11	Yes	Yes	Yes	Translation initiation factor eIF1A, essential protein that forms a complex with Sui1p (eIF1) and the 40S ribosomal subunit and scans for the start codon; C-terminus associates with Fun12p (eIF5B); N terminus interacts with eIF2 and eIF3
YMR261C	R.VCSPSQEASASSISASR.S	TPS3	Yes	Yes	Yes	Regulatory subunit of trehalose-6-phosphate synthase/phosphatase complex, which synthesizes the storage carbohydrate trehalose; expression is induced by stress conditions and repressed by the Ras-cAMP pathway
YMR290C	K.QNNAAPEGEQTTCVEK.F	HAS1	Yes	Yes	Yes	ATP-dependent RNA helicase; localizes to both the nuclear periphery and nucleolus; highly enriched in nuclear pore complex fractions; constituent of 66S pre-ribosomal particles
YMR300C	R.GQDAAGIATCGSR.G	ADE4	No	Yes	Yes	Phosphoribosylpyrophosphate amidotransferase (PRPPAT; amidophosphoribosyltransferase), catalyzes first step of the 'de novo' purine nucleotide biosynthetic pathway
YMR307W	K.YGAYSFCTPK.E	GAS1	Yes	Yes	Yes	Beta-1,3-glucanosyltransferase, required for cell wall assembly; localizes to the cell surface via a glycosylphosphatidylinositol (GPI) anchor
YNL055C	R.GAFDLCLK.S	POR1	No	Yes	No	Mitochondrial porin (voltage-dependent anion channel), outer membrane protein required for the maintenance of mitochondrial osmotic stability and mitochondrial membrane permeability; phosphorylated
YNL061W	R.ILLDAPCSGTGVIGK.D	NOP2	No	No	Yes	Probable RNA m(5)C methyltransferase, essential for processing and maturation of 27S pre-rRNA and large ribosomal subunit biogenesis; localized to the nucleolus; constituent of 66S pre-ribosomal particles
YNL064C	K.KATVDECVLADFDPAK.Y	YDJ1	No	No	Yes	Protein chaperone involved in regulation of the HSP90 and HSP70 functions; involved in protein translocation across membranes; member of the DnaJ family
YNL104C	R.YAVENAPDDVSIQCLVQSR.E	LEU4	No	Yes	No	Alpha-isopropylmalate synthase (2-isopropylmalate synthase); the main isozyme responsible for the first step in the leucine biosynthesis pathway
YNL134C	K.IGPQGALLGCDAAGQIVK.L	YNL134C	Yes	Yes	Yes	Putative protein of unknown function with similarity to dehydrogenases from other model organisms; green fluorescent protein (GFP)-fusion protein localizes to both the cytoplasm and nucleus and is induced by the DNA-damaging agent MMS
YNL135C	R.GSPFQCNIGVGQVIK.G	FPR1	Yes	Yes	Yes	Peptidyl-prolyl cis-trans isomerase (PPIase), binds to the drugs FK506 and rapamycin; also binds to the nonhistone chromatin binding protein Hmo1p and may regulate its assembly or function
YNL138W	K.NNKPSDSGADANTTNEPSAENAPEVEQDPK.C	SRV2	Yes	Yes	Yes	CAP (cyclase-associated protein) subunit of adenylyl cyclase complex; N-terminus binds adenylyl cyclase and facilitates activation by RAS; C-terminus binds ADP-actin monomers, facilitating regulation of actin dynamics and cell morphogenesis
YNL157W	R.ISTCPSTASTAGVVDNATLIQK.E	YNL157W	No	Yes	Yes	Hypothetical protein
YNL241C	K.SEDGSKPAYVDDDTVDKDSK.C	ZWF1	Yes	Yes	Yes	Glucose-6-phosphate dehydrogenase (G6PD), catalyzes the first step of the pentose phosphate pathway; involved in adapting to oxidatve stress; homolog of the human G6PD which is deficient in patients with hemolytic anemia
YNL244C	K.DFACNGNIVKDPEMGEIIQLQGDQR.A	SUI1	No	Yes	Yes	Translation initiation factor eIF1; component of a complex involved in recognition of the initiator codon; modulates translation accuracy at the initiation phase
YNL301C	K.AGGECITLDQLAVR.A	RPL18B	Yes	Yes	Yes	Protein component of the large (60S) ribosomal subunit, identical to Rpl18Ap and has similarity to rat L18 ribosomal protein
YNR016C	K.TIIGSEDGLGVECLR.G	ACC1	Yes	Yes	Yes	Acetyl-CoA carboxylase, biotin containing enzyme that catalyzes the carboxylation of acetyl-CoA to form malonyl-CoA; required for de novo biosynthesis of long-chain fatty acids
YNR046W	K.ACDTSNDNFPLQYDGSK.C	TRM112	No	Yes	No	Subunit of an adoMet-dependent tRNA methyltransferase (MTase) complex (Trm11p-Trm112p), required for the methylation of the guanosine nucleotide at position 10 (m2G10) in tRNAs; putative zinc binding subunit of other MTase-related proteins
YNR046W	K.FLTTNFLK.C	TRM112	Yes	Yes	Yes	Subunit of an adoMet-dependent tRNA methyltransferase (MTase) complex (Trm11p-Trm112p), required for the methylation of the guanosine nucleotide at position 10 (m2G10) in tRNAs; putative zinc binding subunit of other MTase-related proteins
YOL030W	R.VYTVDNSQDHSHCMK.L	GAS5	No	No	Yes	1,3-beta-glucanosyltransferase, has similarity to Gas1p; localizes to the cell wall
YOL038W	K.NYDRKEPPATVEECVK.L	PRE6	No	Yes	No	Alpha 4 subunit of the 20S proteasome; may replace alpha 3 subunit (Pre9p) under stress conditions to create a more active proteasomal isoform; GFP-fusion protein relocates from cytosol to the mitochondrial surface upon oxidative stress
YOL086C	R.ANGTTVLVGMPAGAK.C	ADH1	Yes	Yes	Yes	Alcohol dehydrogenase, fermentative isozyme active as homo- or heterotetramers; required for the reduction of acetaldehyde to ethanol, the last step in the glycolytic pathway
YOR027W	K.FSDALNDANECVK.I	STI1	Yes	Yes	Yes	Hsp90 cochaperone, interacts with the Ssa group of the cytosolic Hsp70 chaperones; activates the ATPase activity of Ssa1p; homolog of mammalian Hop protein
YOR027W	K.LMSFPEAIADCNK.A	STI1	Yes	Yes	Yes	Hsp90 cochaperone, interacts with the Ssa group of the cytosolic Hsp70 chaperones; activates the ATPase activity of Ssa1p; homolog of mammalian Hop protein
YOR046C	R.VNPEDASPQAICLAPSR.E	DBP5	No	Yes	No	Cytoplasmic ATP-dependent RNA helicase of the DEAD-box family involved in mRNA export from the nucleus; involved in translation termination
YOR086C	K.YYINNEEDCAYK.T	TCB1	No	Yes	Yes	Lipid-binding protein containing three calcium and lipid binding domains; non-tagged protein localizes to mitochondria and GFP-fusion protein localizes to the cell periphery; C-termini of Tcb1p, Tcb2p and Tcb3p interact
YOR122C	R.HDAEGVVCVR.T	PFY1	Yes	No	No	Profilin, actin- and phosphatidylinositol 4,5-bisphosphate-binding protein, involved in cytoskeleton organization, required for normal timing of actin polymerization in response to thermal stress; localizes to plasma membrane and cytosol
YOR142W	R.LVGPNCPGIINPATK.V	LSC1	Yes	Yes	Yes	Alpha subunit of succinyl-CoA ligase, which is a mitochondrial enzyme of the TCA cycle that catalyzes the nucleotide-dependent conversion of succinyl-CoA to succinate; phosphorylated
YOR184W	K.ILYEALDANSDFYNVPVDPK.C	SER1	No	Yes	Yes	3-phosphoserine aminotransferase, catalyzes the formation of phosphoserine from 3-phosphohydroxypyruvate, required for serine and glycine biosynthesis; regulated by the general control of amino acid biosynthesis mediated by Gcn4p
YOR204W	R.DLMACAQTGSGK.T	DED1	Yes	Yes	Yes	ATP-dependent DEAD (Asp-Glu-Ala-Asp)-box RNA helicase, required for translation initiation of all yeast mRNAs; mutations in human DEAD-box DBY are a frequent cause of male infertility
YOR204W	R.HIVEDCDMTPVGER.Q	DED1	Yes	Yes	Yes	ATP-dependent DEAD (Asp-Glu-Ala-Asp)-box RNA helicase, required for translation initiation of all yeast mRNAs; mutations in human DEAD-box DBY are a frequent cause of male infertility
YOR209C	K.IICYSDSLNVEK.A	NPT1	Yes	Yes	Yes	Nicotinate phosphoribosyltransferase, acts in the salvage pathway of NAD+ biosynthesis; required for silencing at rDNA and telomeres and has a role in silencing at mating-type loci; localized to the nucleus
YOR220W	R.SNAASCTENDVNATASNPPK.S	YOR220W	No	No	Yes	Protein of unknown function; green fluorescent protein (GFP)-fusion protein localizes to the cytoplasm and is induced in response to the DNA-damaging agent MMS
YOR224C	R.IEAASTTQDQCK.L	RPB8	Yes	Yes	Yes	RNA polymerase subunit ABC14.5, common to RNA polymerases I, II, and III
YOR272W	K.TWDLVTAR.C	YTM1	Yes	Yes	Yes	Constituent of 66S pre-ribosomal particles, required for maturation of the large ribosomal subunit
YOR276W	K.VTTDSDGWCTFEAK.K	CAF20	No	Yes	Yes	Phosphoprotein of the mRNA cap-binding complex involved in translational control, repressor of cap-dependent translation initiation, competes with eIF4G for binding to eIF4E
YOR323C	K.LTEAIQCK.T	PRO2	Yes	Yes	Yes	Gamma-glutamyl phosphate reductase, catalyzes the second step in proline biosynthesis
YOR323C	K.TNYPAGCNAMETLLINPK.F	PRO2	No	Yes	Yes	Gamma-glutamyl phosphate reductase, catalyzes the second step in proline biosynthesis
YOR335C	K.KVEDICNEQIK.E	ALA1	Yes	Yes	Yes	Cytoplasmic alanyl-tRNA synthetase, required for protein synthesis; point mutation (cdc64-1 allele) causes cell cycle arrest at G1; lethality of null mutation is functionally complemented by human homolog
YOR335C	R.VAHGCYISNAALAK.G	ALA1	No	No	Yes	Cytoplasmic alanyl-tRNA synthetase, required for protein synthesis; point mutation (cdc64-1 allele) causes cell cycle arrest at G1; lethality of null mutation is functionally complemented by human homolog
YOR361C	K.TQFSNLQICR.L	PRT1	No	No	Yes	Subunit of the core complex of translation initiation factor 3(eIF3), essential for translation; part of a subcomplex (Prt1p-Rpg1p-Nip1p) that stimulates binding of mRNA and tRNA(i)Met to ribosomes
YOR362C	K.AVENGTTSIGIK.C	PRE10	Yes	No	No	Alpha 7 subunit of the 20S proteasome
YOR375C	K.VDIALPCATQNEVSGEEAK.A	GDH1	Yes	Yes	Yes	NADP(+)-dependent glutamate dehydrogenase, synthesizes glutamate from ammonia and alpha-ketoglutarate; rate of alpha-ketoglutarate utilization differs from Gdh3p; expression regulated by nitrogen and carbon sources
YPL028W	K.AIILGAQSIK.C	ERG10	Yes	Yes	Yes	Acetyl-CoA C-acetyltransferase (acetoacetyl-CoA thiolase), cytosolic enzyme that transfers an acetyl group from one acetyl-CoA molecule to another, forming acetoacetyl-CoA; involved in the first step in mevalonate biosynthesis
YPL028W	K.FGQTVLVDGVERDGLNDAYDGLAMGVHAEK.C	ERG10	No	Yes	No	Acetyl-CoA C-acetyltransferase (acetoacetyl-CoA thiolase), cytosolic enzyme that transfers an acetyl group from one acetyl-CoA molecule to another, forming acetoacetyl-CoA; involved in the first step in mevalonate biosynthesis
YPL061W	K.NAGQICSSGSR.I	ALD6	Yes	Yes	No	Cytosolic aldehyde dehydrogenase, activated by Mg2+ and utilizes NADP+ as the preferred coenzyme; required for conversion of acetaldehyde to acetate; constitutively expressed; locates to the mitochondrial outer surface upon oxidative stress
YPL061W	R.GDVTIAINCLR.D	ALD6	Yes	Yes	Yes	Cytosolic aldehyde dehydrogenase, activated by Mg2+ and utilizes NADP+ as the preferred coenzyme; required for conversion of acetaldehyde to acetate; constitutively expressed; locates to the mitochondrial outer surface upon oxidative stress
YPL091W	K.ADFDNCVAIHPTSAEELVTMR.-	GLR1	No	No	Yes	Cytosolic and mitochondrial glutathione oxidoreductase, converts oxidized glutathione to reduced glutathione
YPL106C	K.VLGTACDK.H	SSE1	No	Yes	Yes	ATPase that is a component of the heat shock protein Hsp90 chaperone complex; binds unfolded proteins; member of the heat shock protein 70 (HSP70) family; localized to the cytoplasm
YPL117C	R.SSETSNDESGETCFSGHDEEQIK.L	IDI1	Yes	Yes	No	Isopentenyl diphosphate:dimethylallyl diphosphate isomerase (IPP isomerase), catalyzes an essential activation step in the isoprenoid biosynthetic pathway; required for viability
YPL126W	R.SVNNSQGCLTADNNGGLK.F	NAN1	No	Yes	Yes	U3 snoRNP protein, component of the small (ribosomal) subunit (SSU) processosome containing U3 snoRNA; required for the biogenesis of18S rRNA
YPL160W	K.GTGVVTCVPSNSPDDYITTK.D	CDC60	Yes	Yes	Yes	Cytosolic leucyl tRNA synthetase, ligates leucine to the appropriate tRNA
YPL231W	K.TLGEQLIENCK.Q	FAS2	Yes	Yes	Yes	Alpha subunit of fatty acid synthetase, which catalyzes the synthesis of long-chain saturated fatty acids; contains beta-ketoacyl reductase and beta-ketoacyl synthase activities; phosphorylated
YPR004C	R.ASVDNGLCDNSLQIGQTGK.V	YPR004C	Yes	Yes	Yes	Protein with similarity to mammalian electron transfer flavoprotein complex subunit ETF-alpha; interacts with yeast frataxin Yfh1p; null mutant displays increased frequency of mitochondrial genome loss (petite formation)
YPR035W	K.GGYPAPQGPYYCGVGAGK.V	GLN1	Yes	Yes	Yes	Glutamine synthetase (GS), synthesizes glutamine from glutamate and ammonia; with Glt1p, forms the secondary pathway for glutamate biosynthesis from ammonia; expression regulated by nitrogen source and by amino acid limitation
YPR062W	R.GHEVVVVDDER.C	FCY1	No	No	Yes	Cytosine deaminase, zinc metalloenzyme that catalyzes the hydrolytic deamination of cytosine to uracil; of biomedical interest because it also catalyzes the deamination of 5-fluorocytosine (5FC) to form anticancer drug 5-fluorouracil (5FU)
YPR181C	R.SDANSNVVPVGCLYTPLK.E	SEC23	Yes	No	No	GTPase-activating protein; component of the Sec23p-Sec24p heterodimeric complex of the COPII vesicle coat, involved in ER to Golgi transport and autophagy; stimulates the GDP-bound form of Sar1p
YPR184W	R.LSDTGEPITSCSYGK.G	GDB1	No	No	Yes	Glycogen debranching enzyme containing glucanotranferase and alpha-1,6-amyloglucosidase activities, required for glycogen degradation; phosphorylated in mitochondria
