# Supplementary material for: Evaluation and optimization of reduction and alkylation methods to maximize peptide identification with MS-based proteomics
Source: Royal Society of Chemistry journal article supplement (doi:10.1039/c7mb00393e), 2017-09-20
Supplement: c7mb00393e3.xlsx [file c7mb00393e3.xlsx]

## Sheet: Expt. 1
Table S2(A). Peptides containing cysteine identified from the first experiment with the reduction/alkylation, but without the enrichment
Reference	Peptide	Gene symbol	XCorr	Obs m/z	PPM	Annotation
YAL005C	R.ARFEELC@ADLFR.S	SSA1	3.666	763.875	0.31	ATPase involved in protein folding and nuclear localization signal (NLS)-directed nuclear transport; member of heat shock protein 70 (HSP70) family; forms a chaperone complex with Ydj1p; localized to the nucleus, cytoplasm, and cell wall
YAL005C	R.FEELC@ADLFR.S	SSA1	3.857	650.306	0.08	ATPase involved in protein folding and nuclear localization signal (NLS)-directed nuclear transport; member of heat shock protein 70 (HSP70) family; forms a chaperone complex with Ydj1p; localized to the nucleus, cytoplasm, and cell wall
YAL016W	K.SLAEC@QELLKN.-	TPD3	4.012	652.83	0.76	Regulatory subunit A of the heterotrimeric protein phosphatase 2A, which also contains regulatory subunit Cdc55p and either catalytic subunit Pph21p or Pph22p; required for cell morphogenesis and for transcription by RNA polymerase III
YAL035W	R.SPIC@C@ILGHVDTGK.T	FUN12	3.006	519.591	0.62	GTPase, required for general translation initiation by promoting Met-tRNAiMet binding to ribosomes and ribosomal subunit joining; homolog of bacterial IF2
YAL038W	K.A]CDDKIMYVDYK.N	CDC19	3.926	760.841	-0.59	Pyruvate kinase, functions as a homotetramer in glycolysis to convert phosphoenolpyruvate to pyruvate, the input for aerobic (TCA cycle) or anaerobic (glucose fermentation) respiration
YAL038W	K.ALNAGKIC@SHK.G	CDC19	3.365	599.821	-0.33	Pyruvate kinase, functions as a homotetramer in glycolysis to convert phosphoenolpyruvate to pyruvate, the input for aerobic (TCA cycle) or anaerobic (glucose fermentation) respiration
YAL038W	K.YRPNC@PIILVTR.C	CDC19	3.673	751.419	0.03	Pyruvate kinase, functions as a homotetramer in glycolysis to convert phosphoenolpyruvate to pyruvate, the input for aerobic (TCA cycle) or anaerobic (glucose fermentation) respiration
YAL038W	K.YRPNC@PIILVTRC@PR.A	CDC19	3.627	639.01	0.49	Pyruvate kinase, functions as a homotetramer in glycolysis to convert phosphoenolpyruvate to pyruvate, the input for aerobic (TCA cycle) or anaerobic (glucose fermentation) respiration
YAL038W	K.YRPNC@PIILVTRCPR[.A	CDC19	3.52	639.01	0.34	Pyruvate kinase, functions as a homotetramer in glycolysis to convert phosphoenolpyruvate to pyruvate, the input for aerobic (TCA cycle) or anaerobic (glucose fermentation) respiration
YAL038W	R.AEVSDVGNAILDGADC@VMLSGETAK.G	CDC19	7.625	846.728	-0.37	Pyruvate kinase, functions as a homotetramer in glycolysis to convert phosphoenolpyruvate to pyruvate, the input for aerobic (TCA cycle) or anaerobic (glucose fermentation) respiration
YAL042W	K.INEHLNEGC@R.I	ERV46	3.019	621.288	-0.93	Protein localized to COPII-coated vesicles, forms a complex with Erv41p; involved in the membrane fusion stage of transport
YAL042W	K.VC@C@QD#CDAVR.S	ERV46	2.588	641.752	-0.19	Protein localized to COPII-coated vesicles, forms a complex with Erv41p; involved in the membrane fusion stage of transport
YAL049C	K.C@C@FEGVCH#DGTPK.G	YAL049C	3.977	783.81	-0.27	Cytoplasmic protein of unknown function, potential Hsp82p interactor; null mutant displays decreased frequency of mitochondrial genome loss (petite formation)
YAL060W	K.FYNSKPC@DAC@QR.G	BDH1	4.094	773.332	-0.66	NAD-dependent (R,R)-butanediol dehydrogenase, catalyzes oxidation of (R,R)-2,3-butanediol to (3R)-acetoin, oxidation of meso-butanediol to (3S)-acetoin, and reduction of acetoin; enhances use of 2,3-butanediol as an aerobic carbon source
YAL060W	R.AIHNGDIAMEDC@K.Q	BDH1	3.793	737.327	0.25	NAD-dependent (R,R)-butanediol dehydrogenase, catalyzes oxidation of (R,R)-2,3-butanediol to (3R)-acetoin, oxidation of meso-butanediol to (3S)-acetoin, and reduction of acetoin; enhances use of 2,3-butanediol as an aerobic carbon source
YAL062W	R.IC@YAFMR.E	GDH3	2.39	480.725	0.22	NADP(+)-dependent glutamate dehydrogenase, synthesizes glutamate from ammonia and alpha-ketoglutarate; rate of alpha-ketoglutarate utilization differs from Gdh1p; expression regulated by nitrogen and carbon sources
YAR009C	K.NGITPCY#TTTADSR.A	YAR009C	3.423	778.854	-0.26	Retrotransposon TYA Gag and TYB Pol genes; in YARCTY1-1 TYB is mutant and probably non-functional
YAR010C	K.EVHTNQDPLDVSASKTEEC@EK.A	YAR010C	4.993	806.036	-0.17	Retrotransposon TYA Gag gene co-transcribed with TYB Pol; in YARCTY1-1 TYB is mutant and probably non-functional
YAR010C	K.EVHTNQDPLDVSASKTEECE#K.A	YAR010C	4.69	806.036	0.07	Retrotransposon TYA Gag gene co-transcribed with TYB Pol; in YARCTY1-1 TYB is mutant and probably non-functional
YAR010C	K.VAC@QLIMR.G	YAR010C	2.845	495.765	0.26	Retrotransposon TYA Gag gene co-transcribed with TYB Pol; in YARCTY1-1 TYB is mutant and probably non-functional
YBL017C	K.NYFLAK.C	PEP1	2.04	378.208	0.16	Type I transmembrane sorting receptor for multiple vacuolar hydrolases; cycles between the late-Golgi and prevacuolar endosome-like compartments
YBL024W	K.TC@QAPLPLTFR.I	NCL1	2.856	652.345	-0.11	S-adenosyl-L-methionine-dependent tRNA: m5C-methyltransferase, methylates cytosine to m5C at several positions in tRNAs and intron-containing pre-tRNAs; similar to Nop2p and human proliferation associated nucleolar protein p120
YBL039C	R.C@EILELK.N	URA7	2.566	452.744	-0.29	Major CTP synthase isozyme (see also URA8), catalyzes the ATP-dependent transfer of the amide nitrogen from glutamine to UTP, forming CTP, the final step in de novo biosynthesis of pyrimidines; involved in phospholipid biosynthesis
YBL050W	K.AGNEDEAGNTYVEAYK.C	SEC17	5.309	865.878	-0.69	Peripheral membrane protein required for vesicular transport between ER and Golgi and for the 'priming' step in homotypic vacuole fusion, part of the cis-SNARE complex; has similarity to alpha-SNAP
YBL050W	K.KAGNEDEAGNTYVEAYK.C	SEC17	6.498	929.926	-0.32	Peripheral membrane protein required for vesicular transport between ER and Golgi and for the 'priming' step in homotypic vacuole fusion, part of the cis-SNARE complex; has similarity to alpha-SNAP
YBL076C	K.LGITGKDDVFKYGLENYNNEC@R.S	ILS1	4.429	869.083	-0.52	Cytoplasmic isoleucine-tRNA synthetase, target of the G1-specific inhibitor reveromycin A
YBL076C	K.YGLENYNNEC@R.S	ILS1	3.837	716.301	-0.73	Cytoplasmic isoleucine-tRNA synthetase, target of the G1-specific inhibitor reveromycin A
YBL076C	R.VISDDYVTSDSGTGIVHNAPAFGEEDNAAC@LK.N	ILS1	4.03	1118.18	-0.69	Cytoplasmic isoleucine-tRNA synthetase, target of the G1-specific inhibitor reveromycin A
YBL087C	K.E#CADLWPR.V	RPL23A	2.476	523.74	0.46	Protein component of the large (60S) ribosomal subunit, identical to Rpl23Bp and has similarity to E. coli L14 and rat L23 ribosomal proteins
YBL087C	K.E]CADLWPR.V	RPL23A	2.311	523.74	0.48	Protein component of the large (60S) ribosomal subunit, identical to Rpl23Bp and has similarity to E. coli L14 and rat L23 ribosomal proteins
YBL087C	K.EC@ADLWPR.V	RPL23A	2.219	523.74	0.31	Protein component of the large (60S) ribosomal subunit, identical to Rpl23Bp and has similarity to E. coli L14 and rat L23 ribosomal proteins
YBL087C	R.ISLGLPVGAIMNC@ADNSGAR.N	RPL23A	3.459	678.003	0.21	Protein component of the large (60S) ribosomal subunit, identical to Rpl23Bp and has similarity to E. coli L14 and rat L23 ribosomal proteins
YBL087C	R.ISLGLPVGAIMNCAD#NSGAR.N	RPL23A	3.741	1016.5	1.9	Protein component of the large (60S) ribosomal subunit, identical to Rpl23Bp and has similarity to E. coli L14 and rat L23 ribosomal proteins
YBL091C	R.NLC@GHSIAPYR.I	MAP2	3.705	644.317	-0.21	Methionine aminopeptidase, catalyzes the cotranslational removal of N-terminal methionine from nascent polypeptides; function is partially redundant with that of Map1p
YBR011C	R.N]CFPHHGYIHNYGAFPQTWEDPNVSHPETK.A	IPP1	4.751	895.653	-0.34	Cytoplasmic inorganic pyrophosphatase (PPase), catalyzes the rapid exchange of oxygens from Pi with water, highly expressed and essential for viability, active-site residues show identity to those from E. coli PPase
YBR011C	R.NC@FPHHGYIHNYGAFPQTWEDPNVSHPETK.A	IPP1	5.307	1193.87	-0.51	Cytoplasmic inorganic pyrophosphatase (PPase), catalyzes the rapid exchange of oxygens from Pi with water, highly expressed and essential for viability, active-site residues show identity to those from E. coli PPase
YBR015C	K.VLNEYVC@VNK.N	MNN2	3.919	619.315	-1.97	Alpha-1,2-mannosyltransferase, responsible for addition of the first alpha-1,2-linked mannose to form the branches on the mannan backbone of oligosaccharides, localizes to an early Golgi compartment
YBR025C	K.C@EDVFEYKDDSAIK.A	OLA1	5.107	859.882	-0.13	P-loop ATPase with similarity to human OLA1 and bacterial YchF; identified as specifically interacting with the proteasome; protein levels are induced by hydrogen peroxide
YBR025C	K.STFFQAITR.C	OLA1	3.079	535.785	0.6	P-loop ATPase with similarity to human OLA1 and bacterial YchF; identified as specifically interacting with the proteasome; protein levels are induced by hydrogen peroxide
YBR025C	R.C@PLGNPANYPFATIDPEEAR.V	OLA1	5.659	1116.52	-0.92	P-loop ATPase with similarity to human OLA1 and bacterial YchF; identified as specifically interacting with the proteasome; protein levels are induced by hydrogen peroxide
YBR031W	R.SGQGAFGNMC@R.G	RPL4A	2.976	600.748	-0.16	N-terminally acetylated protein component of the large (60S) ribosomal subunit, nearly identical to Rpl4Bp and has similarity to E. coli L4 and rat L4 ribosomal proteins
YBR033W	K.A]SHAC@DQCR.R	EDS1	1.768	552.719	-0.44	Putative zinc cluster protein; YBR033W is not an essential gene
YBR035C	R.FKDAEDIPC@PDYWGGLR.I	PDX3	2.98	680.316	0.3	Pyridoxine (pyridoxamine) phosphate oxidase, has homologs in E. coli and Myxococcus xanthus; transcription is under the general control of nitrogen metabolism
YBR039W	K.GLC@GSIHSQLAK.A	ATP3	3.65	635.833	0.44	Gamma subunit of the F1 sector of mitochondrial F1F0 ATP synthase, which is a large, evolutionarily conserved enzyme complex required for ATP synthesis
YBR048W	K.C]PFTGLVSIR.G	RPS11B	3.215	575.308	0.26	Protein component of the small (40S) ribosomal subunit; identical to Rps11Ap and has similarity to E. coli S17 and rat S11 ribosomal proteins
YBR048W	K.TAIEGSYIDKK.C	RPS11B	3.521	612.827	0.15	Protein component of the small (40S) ribosomal subunit; identical to Rps11Ap and has similarity to E. coli S17 and rat S11 ribosomal proteins
YBR048W	R.VQVGDIVTVGQC@RPISK.T	RPS11B	4.852	928.506	-0.3	Protein component of the small (40S) ribosomal subunit; identical to Rps11Ap and has similarity to E. coli S17 and rat S11 ribosomal proteins
YBR078W	K.KLQSNGAIQGDSFVC@K.N	ECM33	6.087	876.442	1.57	GPI-anchored protein of unknown function, has a possible role in apical bud growth; GPI-anchoring on the plasma membrane crucial to function; phosphorylated in mitochondria; similar to Sps2p and Pst1p
YBR078W	K.LQSNGAIQGDSFVC@K.N	ECM33	4.98	812.394	1	GPI-anchored protein of unknown function, has a possible role in apical bud growth; GPI-anchoring on the plasma membrane crucial to function; phosphorylated in mitochondria; similar to Sps2p and Pst1p
YBR096W	K.DALEYC@GLYNEK.V	YBR096W	3.634	737.83	0.22	Putative protein of unknown function; green fluorescent protein (GFP)-fusion protein localizes to the ER
YBR115C	R.GC@IVRPGYVTGASANGSSNTDDFLLR.F	LYS2	5.612	909.777	0.59	Alpha aminoadipate reductase, catalyzes the reduction of alpha-aminoadipate to alpha-aminoadipate 6-semialdehyde, which is the fifth step in biosynthesis of lysine; activation requires posttranslational phosphopantetheinylation by Lys5p
YBR115C	R.TC@VVETPTLNSDK.S	LYS2	3.741	732.355	-1.54	Alpha aminoadipate reductase, catalyzes the reduction of alpha-aminoadipate to alpha-aminoadipate 6-semialdehyde, which is the fifth step in biosynthesis of lysine; activation requires posttranslational phosphopantetheinylation by Lys5p
YBR115C	R.YLPNGDC@EC@C@GR.A	LYS2	3.231	750.787	0.23	Alpha aminoadipate reductase, catalyzes the reduction of alpha-aminoadipate to alpha-aminoadipate 6-semialdehyde, which is the fifth step in biosynthesis of lysine; activation requires posttranslational phosphopantetheinylation by Lys5p
YBR118W	K.F]VPSK#PMCVEAFSEYPPLGR.F	TEF2	3.01	790.054	0.46	Translational elongation factor EF-1 alpha; also encoded by TEF1; functions in the binding reaction of aminoacyl-tRNA (AA-tRNA) to ribosomes
YBR118W	K.FVPSK#PMCVEAFSEYPPLGR.F	TEF2	4.005	776.378	0.06	Translational elongation factor EF-1 alpha; also encoded by TEF1; functions in the binding reaction of aminoacyl-tRNA (AA-tRNA) to ribosomes
YBR118W	K.FVPSKPMC@VEAFSEYPPLGR.F	TEF2	3.514	776.379	0.73	Translational elongation factor EF-1 alpha; also encoded by TEF1; functions in the binding reaction of aminoacyl-tRNA (AA-tRNA) to ribosomes
YBR118W	K.STTTGHLIYK.C	TEF2	2.972	560.803	-0.53	Translational elongation factor EF-1 alpha; also encoded by TEF1; functions in the binding reaction of aminoacyl-tRNA (AA-tRNA) to ribosomes
YBR118W	R.GNVCGD#AKNDPPK.G	TEF2	2.721	686.32	-0.03	Translational elongation factor EF-1 alpha; also encoded by TEF1; functions in the binding reaction of aminoacyl-tRNA (AA-tRNA) to ribosomes
YBR118W	R.RGNVCGD#AKNDPPK.G	TEF2	2.093	509.916	-0.05	Translational elongation factor EF-1 alpha; also encoded by TEF1; functions in the binding reaction of aminoacyl-tRNA (AA-tRNA) to ribosomes
YBR121C	K.FSDWMC@R.D	GRS1	2.512	509.2	0.29	Cytoplasmic and mitochondrial glycyl-tRNA synthase that ligates glycine to the cognate anticodon bearing tRNA; transcription termination factor that may interact with the 3'-end of pre-mRNA to promote 3'-end formation
YBR121C	K.TSYGWIEC@VGC@ADR.S	GRS1	4.095	837.356	-0.07	Cytoplasmic and mitochondrial glycyl-tRNA synthase that ligates glycine to the cognate anticodon bearing tRNA; transcription termination factor that may interact with the 3'-end of pre-mRNA to promote 3'-end formation
YBR127C	K.IPIFSASGLPHNEIAAQIC@R.Q	VMA2	2.822	732.053	0.33	Subunit B of the eight-subunit V1 peripheral membrane domain of the vacuolar H+-ATPase (V-ATPase), an electrogenic proton pump found throughout the endomembrane system; contains nucleotide binding sites; also detected in the cytoplasm
YBR127C	R.GQKIPIFSASGLPHNEIAAQIC@R.Q	VMA2	3.46	836.445	1.14	Subunit B of the eight-subunit V1 peripheral membrane domain of the vacuolar H+-ATPase (V-ATPase), an electrogenic proton pump found throughout the endomembrane system; contains nucleotide binding sites; also detected in the cytoplasm
YBR139W	K.GGYHPVLSSEEC@EK.M	YBR139W	3.627	796.357	0.13	Putative serine type carboxypeptidase with a role in phytochelatin synthesis; green fluorescent protein (GFP)-fusion protein localizes to the vacuole; expression induced by nitrogen limitation in a GLN3, GAT1-independent manner
YBR139W	K.GGYHPVLSSEECE#K.M	YBR139W	3.453	796.357	0.13	Putative serine type carboxypeptidase with a role in phytochelatin synthesis; green fluorescent protein (GFP)-fusion protein localizes to the vacuole; expression induced by nitrogen limitation in a GLN3, GAT1-independent manner
YBR159W	K.Y]CAITGASDGIGK.E	YBR159W	2.606	656.812	-2.02	Microsomal beta-keto-reductase; contains oleate response element (ORE) sequence in the promoter region; mutants exhibit reduced VLCFA synthesis, accumulate high levels of dihydrosphingosine, phytosphingosine and medium-chain ceramides
YBR162C	R.TLQYGDASC@SC@WK.T	TOS1	3.702	788.332	0.05	Covalently-bound cell wall protein of unknown function; identified as a cell cycle regulated SBF target gene; deletion mutants are highly resistant to treatment with beta-1,3-glucanase; has sequence similarity to YJL171C
YBR191W	K.C]RQEFLER.V	RPL21A	3.139	569.277	0.04	Protein component of the large (60S) ribosomal subunit, nearly identical to Rpl21Bp and has similarity to rat L21 ribosomal protein
YBR218C	R.TAFGNGTC@FVER.F	PYC2	2.576	679.811	-0.45	Pyruvate carboxylase isoform, cytoplasmic enzyme that converts pyruvate to oxaloacetate; highly similar to isoform Pyc1p but differentially regulated; mutations in the human homolog are associated with lactic acidosis
YBR221C	K.C@QMVFR.G	PDB1	2.031	420.696	-0.04	E1 beta subunit of the pyruvate dehydrogenase (PDH) complex, which is an evolutionarily-conserved multi-protein complex found in mitochondria
YBR244W	K.C@GFTPQYK.E	GPX2	3.203	500.731	0	Phospholipid hydroperoxide glutathione peroxidase induced by glucose starvation that protects cells from phospholipid hydroperoxides and nonphospholipid peroxides during oxidative stress
YBR244W	K.VVLIVNVASK.C	GPX2	2.314	521.337	0.1	Phospholipid hydroperoxide glutathione peroxidase induced by glucose starvation that protects cells from phospholipid hydroperoxides and nonphospholipid peroxides during oxidative stress
YBR263W	K.KLC@NESSEVAALSGEISK.W	SHM1	4.844	961.478	-2.71	Mitochondrial serine hydroxymethyltransferase, converts serine to glycine plus 5,10 methylenetetrahydrofolate; involved in generating precursors for purine, pyrimidine, amino acid, and lipid biosynthesis; reverse reaction generates serine
YBR263W	K.LC@NESSEVAALSGEISK.W	SHM1	5.807	897.43	-3.27	Mitochondrial serine hydroxymethyltransferase, converts serine to glycine plus 5,10 methylenetetrahydrofolate; involved in generating precursors for purine, pyrimidine, amino acid, and lipid biosynthesis; reverse reaction generates serine
YBR286W	K.LVEIPNLGC@EEK.D	APE3	3.474	700.858	0.16	Vacuolar aminopeptidase Y, processed to mature form by Prb1p
YCL009C	R.KQH#VLNCLVQNEPGVLSR.V	ILV6	5.01	697.709	0.23	Regulatory subunit of acetolactate synthase, which catalyzes the first step of branched-chain amino acid biosynthesis; enhances activity of the Ilv2p catalytic subunit, localizes to mitochondria
YCL030C	K.FHAAQLPTETLEVETQPGVLC@SR.F	HIS4	3.67	861.768	0.6	Multifunctional enzyme containing phosphoribosyl-ATP pyrophosphatase, phosphoribosyl-AMP cyclohydrolase, and histidinol dehydrogenase activities; catalyzes the second, third, ninth and tenth steps in histidine biosynthesis
YCL030C	K.LVDNAGSVFVGAYTPESC@GDYSSGTNHTLPTYGYAR.Q	HIS4	3.519	1276.25	0.24	Multifunctional enzyme containing phosphoribosyl-ATP pyrophosphatase, phosphoribosyl-AMP cyclohydrolase, and histidinol dehydrogenase activities; catalyzes the second, third, ninth and tenth steps in histidine biosynthesis
YCL030C	R.KFHAAQLPTETLEVETQPGVLC@SR.F	HIS4	4.005	904.466	0.75	Multifunctional enzyme containing phosphoribosyl-ATP pyrophosphatase, phosphoribosyl-AMP cyclohydrolase, and histidinol dehydrogenase activities; catalyzes the second, third, ninth and tenth steps in histidine biosynthesis
YCL033C	R.VEIC@C@AR.C	YCL033C	2.363	454.21	1.14	Putative protein-methionine-R-oxide reductase; involved in response to oxidative stress; similar to mouse Sepx1p and fly SelRp; YCL033C is not an essential gene
YCL035C	K.TYC@PYC@HAALNTLFEK.L	GRX1	4.478	994.455	-0.44	Hydroperoxide and superoxide-radical responsive heat-stable glutathione-dependent disulfide oxidoreductase with active site cysteine pair; protects cells from oxidative damage
YCL050C	K.EWIC@VVPR.S	APA1	2.644	529.777	0.58	Diadenosine 5',5''-P1,P4-tetraphosphate phosphorylase I (AP4A phosphorylase), involved in catabolism of bis(5'-nucleosidyl) tetraphosphates; has similarity to Apa2p
YCL050C	K.LLC@ALDNEESDKR.H	APA1	4.305	781.877	-0.72	Diadenosine 5',5''-P1,P4-tetraphosphate phosphorylase I (AP4A phosphorylase), involved in catabolism of bis(5'-nucleosidyl) tetraphosphates; has similarity to Apa2p
YCR012W	K.DVTFLNDC@VGPEVEAAVK.A	PGK1	5.683	981.977	-0.32	3-phosphoglycerate kinase, catalyzes transfer of high-energy phosphoryl groups from the acyl phosphate of 1,3-bisphosphoglycerate to ADP to produce ATP; key enzyme in glycolysis and gluconeogenesis
YCR012W	K.ELQSLLGKDVTFLNDC@VGPEVEAAVK.A	PGK1	4.814	944.487	-1.4	3-phosphoglycerate kinase, catalyzes transfer of high-energy phosphoryl groups from the acyl phosphate of 1,3-bisphosphoglycerate to ADP to produce ATP; key enzyme in glycolysis and gluconeogenesis
YCR031C	K.ADRDESSPYAAMLAAQDVAAK.C	RPS14A	2.648	732.679	-0.2	Ribosomal protein 59 of the small subunit, required for ribosome assembly and 20S pre-rRNA processing; mutations confer cryptopleurine resistance; nearly identical to Rps14Bp and similar to E. coli S11 and rat S14 ribosomal proteins
YCR031C	K.CK#EVGITAVHVK.I	RPS14A	2.537	335.939	0.28	Ribosomal protein 59 of the small subunit, required for ribosome assembly and 20S pre-rRNA processing; mutations confer cryptopleurine resistance; nearly identical to Rps14Bp and similar to E. coli S11 and rat S14 ribosomal proteins
YCR031C	K.VKADRDESSPYAAMLAAQDVAAK.C	RPS14A	3.597	606.552	-0.18	Ribosomal protein 59 of the small subunit, required for ribosome assembly and 20S pre-rRNA processing; mutations confer cryptopleurine resistance; nearly identical to Rps14Bp and similar to E. coli S11 and rat S14 ribosomal proteins
YCR053W	K.HYILDPHTAVGVCATE#R.L	THR4	4.53	969.978	-0.23	Threonine synthase, conserved protein that catalyzes formation of threonine from 0-phosphohomoserine; expression is regulated by the GCN4-mediated general amino acid control pathway
YCR084C	K.SLDHTSVVC@C@VK.F	TUP1	4.14	702.834	-0.46	General repressor of transcription, forms complex with Cyc8p, involved in the establishment of repressive chromatin structure through interactions with histones H3 and H4, appears to enhance expression of some genes
YCR105W	R.NGCGPGK.R	ADH7	1.554	316.645	-0.3	NADPH-dependent medium chain alcohol dehydrogenase with broad substrate specificity; member of the cinnamyl family of alcohol dehydrogenases; may be involved in fusel alcohol synthesis or in aldehyde tolerance
YDL003W	K.ASGC@DDESGD#NEYITLR[.T	MCD1	1.654	1008.41	-1.18	Essential protein required for sister chromatid cohesion in mitosis and meiosis; subunit of the cohesin complex; expression is cell cycle regulated and peaks in S phase
YDL014W	K.A]NCIDSTVDAETVFAR.E	NOP1	4.987	884.913	1.5	Nucleolar protein, component of the small subunit processome complex, which is required for processing of pre-18S rRNA; has similarity to mammalian fibrillarin
YDL022W	K.ELLNGQSAQGLITC@K.E	GPD1	4.898	816.425	-0.23	NAD-dependent glycerol-3-phosphate dehydrogenase, key enzyme of glycerol synthesis, essential for growth under osmotic stress; expression regulated by high-osmolarity glycerol response pathway; homolog of Gpd2p
YDL022W	R.LMATSGKDAWEC@EK.E	GPD1	3.686	821.367	0.82	NAD-dependent glycerol-3-phosphate dehydrogenase, key enzyme of glycerol synthesis, essential for growth under osmotic stress; expression regulated by high-osmolarity glycerol response pathway; homolog of Gpd2p
YDL055C	K.DNSPFFVLNSDVIC@EYPFK.E	PSA1	3.921	1146.04	-0.37	GDP-mannose pyrophosphorylase (mannose-1-phosphate guanyltransferase), synthesizes GDP-mannose from GTP and mannose-1-phosphate in cell wall biosynthesis; required for normal cell wall structure
YDL055C	K.STIVGWNSTVGQWC@R.L	PSA1	5.069	875.92	-0.06	GDP-mannose pyrophosphorylase (mannose-1-phosphate guanyltransferase), synthesizes GDP-mannose from GTP and mannose-1-phosphate in cell wall biosynthesis; required for normal cell wall structure
YDL061C	R.KYDLNIC@R.Q	RPS29B	2.488	541.276	-0.61	Protein component of the small (40S) ribosomal subunit; nearly identical to Rps29Ap and has similarity to rat S29 and E. coli S14 ribosomal proteins
YDL061C	R.Q]C@RVCSSHTGLVR.K	RPS29B	2.712	520.589	0.26	Protein component of the small (40S) ribosomal subunit; nearly identical to Rps29Ap and has similarity to rat S29 and E. coli S14 ribosomal proteins
YDL061C	R.VC@SSHTGLVR.K	RPS29B	2.927	558.285	-0.21	Protein component of the small (40S) ribosomal subunit; nearly identical to Rps29Ap and has similarity to rat S29 and E. coli S14 ribosomal proteins
YDL066W	K.C@ATITPDEAR.V	IDP1	2.543	567.267	0.18	Mitochondrial NADP-specific isocitrate dehydrogenase, catalyzes the oxidation of isocitrate to alpha-ketoglutarate; not required for mitochondrial respiration and may function to divert alpha-ketoglutarate to biosynthetic processes
YDL066W	K.DLALAC@GNNER.S	IDP1	3.943	616.788	0.15	Mitochondrial NADP-specific isocitrate dehydrogenase, catalyzes the oxidation of isocitrate to alpha-ketoglutarate; not required for mitochondrial respiration and may function to divert alpha-ketoglutarate to biosynthetic processes
YDL084W	R.IC@VSTDVFGR.G	SUB2	3.174	577.287	0.42	Component of the TREX complex required for nuclear mRNA export; member of the DEAD-box RNA helicase superfamily and is involved in early and late steps of spliceosome assembly; homolog of the human splicing factor hUAP56
YDL100C	K.MPLC@AGEIR.G	GET3	2.81	523.76	-0.28	Guanine nucleotide exchange factor for Gpa1p; amplifies G protein signaling; subunit of the GET complex, which is involved in Golgi to ER trafficking; has low-level ATPase activity and is involved in resistance to heat and metal stress
YDL100C	K.VTGMNNLSC@MEIDPSAALK.D	GET3	3.523	1025.98	-0.79	Guanine nucleotide exchange factor for Gpa1p; amplifies G protein signaling; subunit of the GET complex, which is involved in Golgi to ER trafficking; has low-level ATPase activity and is involved in resistance to heat and metal stress
YDL103C	K.F]GCLEVDRC@K.E	QRI1	3.322	642.297	-0.59	UDP-N-acetylglucosamine pyrophosphorylase, catalyzes the formation of UDP-N-acetylglucosamine (UDP-GlcNAc), which is important in cell wall biosynthesis, protein N-glycosylation, and GPI anchor biosynthesis
YDL131W	R.VGIADTVGC@ANPR.Q	LYS21	4.587	665.333	0.14	Homocitrate synthase isozyme, catalyzes the condensation of acetyl-CoA and alpha-ketoglutarate to form homocitrate, which is the first step in the lysine biosynthesis pathway; highly similar to the other isozyme, Lys20p
YDL136W	K.SIAC@VLTVINEQQR.E	RPL35B	4.184	544.291	0.09	Protein component of the large (60S) ribosomal subunit, identical to Rpl35Ap and has similarity to rat L35 ribosomal protein
YDL145C	K.AWEVDTC@R.G	COP1	2.686	518.729	0.03	Alpha subunit of COPI vesicle coatomer complex, which surrounds transport vesicles in the early secretory pathway
YDL145C	R.TYIPSTPC@ELPAQLGYVR.A	COP1	3.907	1033.03	0.65	Alpha subunit of COPI vesicle coatomer complex, which surrounds transport vesicles in the early secretory pathway
YDL160C	R.TLVC@SDLLTR.G	DHH1	2.639	589.315	-1.32	Cytoplasmic DExD/H-box helicase, stimulates mRNA decapping, coordinates distinct steps in mRNA function and decay, interacts with both the decapping and deadenylase complexes, may have a role in mRNA export and translation
YDL168W	K.EINQAFEDLHNGDC@LR.T	SFA1	3.799	965.938	-1.1	Bifunctional enzyme containing both alcohol dehydrogenase and glutathione-dependent formaldehyde dehydrogenase activities, functions in formaldehyde detoxification and formation of long chain and complex alcohols, regulated by Hog1p-Sko1p
YDL171C	K.VIVVGGGDTGNDC@LGTSVR.H	GLT1	5.696	938.464	-1.14	NAD(+)-dependent glutamate synthase (GOGAT), synthesizes glutamate from glutamine and alpha-ketoglutarate; with Gln1p, forms the secondary pathway for glutamate biosynthesis from ammonia; expression regulated by nitrogen source
YDL178W	K.IRDFDPVSGILK.C	DLD2	3.16	680.385	-0.07	D-lactate dehydrogenase, located in the mitochondrial matrix
YDL185W	K.FTC@NATHELVVR.T	TFP1	4.321	723.861	-0.19	Vacuolar ATPase V1 domain subunit A containing the catalytic nucleotide binding sites; protein precursor undergoes self-catalyzed splicing to yield the extein Tfp1p and the intein Vde (PI-SceI), which is a site-specific endonuclease
YDL185W	K.LNLC@AEYK.D	TFP1	2.647	505.753	1.16	Vacuolar ATPase V1 domain subunit A containing the catalytic nucleotide binding sites; protein precursor undergoes self-catalyzed splicing to yield the extein Tfp1p and the intein Vde (PI-SceI), which is a site-specific endonuclease
YDL185W	R.VLDALFPC@VQGGTTC@IPGAFGC@GK.T	TFP1	3.762	842.403	-1.24	Vacuolar ATPase V1 domain subunit A containing the catalytic nucleotide binding sites; protein precursor undergoes self-catalyzed splicing to yield the extein Tfp1p and the intein Vde (PI-SceI), which is a site-specific endonuclease
YDL226C	K.C@MDC@GAPNPQWATPK.F	GCS1	4.995	874.863	-0.01	ADP-ribosylation factor GTPase activating protein (ARF GAP), involved in ER-Golgi transport; shares functional similarity with Glo3p
YDL229W	R.R]TFTTCADNQTTVQFPVYQGER.V	SSB1	3.489	873.747	0.02	Cytoplasmic ATPase that is a ribosome-associated molecular chaperone, functions with J-protein partner Zuo1p; may be involved in folding of newly-made polypeptide chains; member of the HSP70 family; interacts with phosphatase subunit Reg1p
YDL229W	R.TFTTC@ADNQTTVQFPVYQGER.V	SSB1	5.265	821.713	-0.13	Cytoplasmic ATPase that is a ribosome-associated molecular chaperone, functions with J-protein partner Zuo1p; may be involved in folding of newly-made polypeptide chains; member of the HSP70 family; interacts with phosphatase subunit Reg1p
YDR002W	K.I]CANHIIAPEYTLKPNVGSDR.S	YRB1	5.19	1184.61	0.21	Ran GTPase binding protein; involved in nuclear protein import and RNA export, ubiquitin-mediated protein degradation during the cell cycle; shuttles between the nucleus and cytoplasm; is essential; homolog of human RanBP1
YDR023W	K.ELVSC@SNC@TDYQSR.N	SES1	4.51	859.859	-0.44	Cytosolic seryl-tRNA synthetase, class II aminoacyl-tRNA synthetase that aminoacylates tRNA(Ser), displays tRNA-dependent amino acid recognition which enhances discrimination of the serine substrate, interacts with peroxin Pex21p
YDR023W	K.KYVHC@LNSTLAATQR.A	SES1	5.401	587.974	0.43	Cytosolic seryl-tRNA synthetase, class II aminoacyl-tRNA synthetase that aminoacylates tRNA(Ser), displays tRNA-dependent amino acid recognition which enhances discrimination of the serine substrate, interacts with peroxin Pex21p
YDR023W	K.YVHC@LNSTLAATQR.A	SES1	4.591	817.41	0.4	Cytosolic seryl-tRNA synthetase, class II aminoacyl-tRNA synthetase that aminoacylates tRNA(Ser), displays tRNA-dependent amino acid recognition which enhances discrimination of the serine substrate, interacts with peroxin Pex21p
YDR037W	K.EIC@NAYTELNDPFDQR.A	KRS1	5.018	992.939	-0.3	Lysyl-tRNA synthetase; also identified as a negative regulator of general control of amino acid biosynthesis
YDR037W	K.ILVDNKLEC@PPPLTNAR.M	KRS1	4.338	975.528	0.48	Lysyl-tRNA synthetase; also identified as a negative regulator of general control of amino acid biosynthesis
YDR037W	R.VQLLTPC@LHMLPADHFGFKDQETR.Y	KRS1	3.78	957.142	-0.48	Lysyl-tRNA synthetase; also identified as a negative regulator of general control of amino acid biosynthesis
YDR050C	R.LNTASIPENVEVVIC@PPATYLDYSVSLVK.K	TPI1	2.791	1064.56	-0.13	Triose phosphate isomerase, abundant glycolytic enzyme; mRNA half-life is regulated by iron availability; transcription is controlled by activators Reb1p, Gcr1p, and Rap1p through binding sites in the 5' non-coding region
YDR051C	R.GLNNTGGVYENNEDNIC@EGKPGK.C	YDR051C	2.663	827.043	-0.82	Protein of unknown function; interacts with Hsp82p in two-hybrid assay; deletion confers sensitivity to Nickel
YDR062W	R.VPLC@EPEELPDDIQKENEYGTLDSPGHLYQVK.S	LCB2	5.146	1238.26	0.42	Component of serine palmitoyltransferase, responsible along with Lcb1p for the first committed step in sphingolipid synthesis, which is the condensation of serine with palmitoyl-CoA to form 3-ketosphinganine
YDR074W	R.IINC@VTQLPYK.I	TPS2	3.906	674.867	-1.19	Phosphatase subunit of the trehalose-6-phosphate synthase/phosphatase complex, which synthesizes the storage carbohydrate trehalose; expression is induced by stress conditions and repressed by the Ras-cAMP pathway
YDR091C	R.APESLLTGC@NR.F	RLI1	3.201	609.301	0.09	Essential iron-sulfur protein required for ribosome biogenesis and translation initiation; facilitates binding of a multifactor complex (MFC) of translation initiation factors to the small ribosomal subunit; predicted ABC family ATPase
YDR101C	R.SYNC@GVVPGSR.V	ARX1	3.104	598.28	0.43	Shuttling pre-60S factor; involved in the biogenesis of ribosomal large subunit biogenesis; interacts directly with Alb1; responsible for Tif6 recycling defects in absence of Rei1; associated with the ribosomal export complex
YDR127W	K.C@YGDSAQFVSDEDLR.F	ARO1	5.479	881.373	0.14	Pentafunctional arom protein, catalyzes steps 2 through 6 in the biosynthesis of chorismate, which is a precursor to aromatic amino acids
YDR127W	K.LDGAEPLEC@TSK.K	ARO1	4.163	660.312	1.52	Pentafunctional arom protein, catalyzes steps 2 through 6 in the biosynthesis of chorismate, which is a precursor to aromatic amino acids
YDR127W	R.ALILAALGEGQC@K.I	ARO1	4.544	672.372	0.55	Pentafunctional arom protein, catalyzes steps 2 through 6 in the biosynthesis of chorismate, which is a precursor to aromatic amino acids
YDR150W	K.ATNHHLLSDSAYEDLVK.C	NUM1	5.202	956.973	-0.87	Protein required for nuclear migration, localizes to the mother cell cortex and the bud tip; may mediate interactions of dynein and cytoplasmic microtubules with the cell cortex
YDR158W	K.EYVC@DAYK.L	HOM2	2.09	524.226	0.12	Aspartic beta semi-aldehyde dehydrogenase, catalyzes the second step in the common pathway for methionine and threonine biosynthesis; expression regulated by Gcn4p and the general control of amino acid synthesis
YDR158W	R.VAVSDGHTEC@ISLR.F	HOM2	4.303	772.381	1.29	Aspartic beta semi-aldehyde dehydrogenase, catalyzes the second step in the common pathway for methionine and threonine biosynthesis; expression regulated by Gcn4p and the general control of amino acid synthesis
YDR172W	K.ERYDQC@VSNVSNFLR.A	SUP35	4.371	943.944	-0.62	Translation termination factor eRF3; altered protein conformation creates the [PSI(+)] prion, a dominant cytoplasmically inherited protein aggregate that alters translational fidelity and creates a nonsense suppressor phenotype
YDR182W	R.ILLTHVPLWRDPE#QQTCGQLR.E	CDC1	2.701	854.12	-0.08	Putative membrane protein of unknown function involved in Mn2+ homeostasis; mutants display actin and general growth defects, heterogeneous cell cycle arrests, and pleiotropic defects in cell cycle progression and organelle distribution
YDR182W	R.ILLTHVPLWRDPEQQTCGQLR[.E	CDC1	3.115	854.119	-1.2	Putative membrane protein of unknown function involved in Mn2+ homeostasis; mutants display actin and general growth defects, heterogeneous cell cycle arrests, and pleiotropic defects in cell cycle progression and organelle distribution
YDR188W	K.IIDLKNEVC@GMDPDKGFVIINQK.G	CCT6	5.866	882.792	-0.31	Subunit of the cytosolic chaperonin Cct ring complex, related to Tcp1p, essential protein that is required for the assembly of actin and tubulins in vivo; contains an ATP-binding motif
YDR211W	R.C]IYYQDLPLPSSR.E	GCD6	4.367	806.395	-0.13	Catalytic epsilon subunit of the translation initiation factor eIF2B, the guanine-nucleotide exchange factor for eIF2; activity subsequently regulated by phosphorylated eIF2; first identified as a negative regulator of GCN4 expression
YDR212W	K.SATESLLVPGYALNC@TVASQAMPK.R	TCP1	3.478	842.086	0.4	Alpha subunit of chaperonin-containing T-complex, which mediates protein folding in the cytosol; involved in maintenance of actin cytoskeleton; homolog to Drosophila melanogaster and mouse tailless complex polypeptide
YDR233C	K.QKTQEFSQMAC@EK.T	RTN1	3.701	807.865	-1.54	ER membrane protein that interacts with exocyst subunit Sec6p and with Yip3p; also interacts with Sbh1p; null mutant has an altered (mostly cisternal) ER morphology; member of the RTNLA (reticulon-like A) subfamily
YDR233C	K.SC@NC@DLLLWR.N	RTN1	3.664	668.811	0.93	ER membrane protein that interacts with exocyst subunit Sec6p and with Yip3p; also interacts with Sbh1p; null mutant has an altered (mostly cisternal) ER morphology; member of the RTNLA (reticulon-like A) subfamily
YDR233C	K.TQEFSQMAC@EK.T	RTN1	4.077	679.789	-0.08	ER membrane protein that interacts with exocyst subunit Sec6p and with Yip3p; also interacts with Sbh1p; null mutant has an altered (mostly cisternal) ER morphology; member of the RTNLA (reticulon-like A) subfamily
YDR234W	R.LSDLQSAADVVC@PTGDLNK.V	LYS4	6.242	1001.99	0.07	Homoaconitase, catalyzes the conversion of homocitrate to homoisocitrate, which is a step in the lysine biosynthesis pathway
YDR272W	K.ALDELEQFC@SKHEVTAGR.F	GLO2	2.683	697.337	-0.01	Cytoplasmic glyoxalase II, catalyzes the hydrolysis of S-D-lactoylglutathione into glutathione and D-lactate
YDR321W	K.SQNAAVNGSGIAC@QQR.S	ASP1	4.504	830.895	-0.08	Cytosolic L-asparaginase, involved in asparagine catabolism
YDR353W	K.GISAC@AVC@DGAVPIFR.N	TRR1	4.746	846.913	-0.08	Cytoplasmic thioredoxin reductase, key regulatory enzyme that determines the redox state of the thioredoxin system, which acts as a disulfide reductase system and protects cells against both oxidative and reductive stress
YDR353W	R.NKPLAVIGGGDSAC@EEAQFLTK.Y	TRR1	5.263	1153.08	-1.84	Cytoplasmic thioredoxin reductase, key regulatory enzyme that determines the redox state of the thioredoxin system, which acts as a disulfide reductase system and protects cells against both oxidative and reductive stress
YDR353W	R.QAITSAGSGC@MAALDAEK.Y	TRR1	5.712	898.91	-0.92	Cytoplasmic thioredoxin reductase, key regulatory enzyme that determines the redox state of the thioredoxin system, which acts as a disulfide reductase system and protects cells against both oxidative and reductive stress
YDR385W	K.IQEPVFLVEIQC@PEQAVGGIYSVLNK.K	EFT2	5.726	977.515	-0.73	Elongation factor 2 (EF-2), also encoded by EFT1; catalyzes ribosomal translocation during protein synthesis; contains diphthamide, the unique posttranslationally modified histidine residue specifically ADP-ribosylated by diphtheria toxin
YDR385W	K.IWC@FGPDGNGPNLVIDQTK.A	EFT2	6.005	1066.02	-0.46	Elongation factor 2 (EF-2), also encoded by EFT1; catalyzes ribosomal translocation during protein synthesis; contains diphthamide, the unique posttranslationally modified histidine residue specifically ADP-ribosylated by diphtheria toxin
YDR385W	R.AEQLYEGPADDANC@IAIK.N	EFT2	5.372	989.465	0.33	Elongation factor 2 (EF-2), also encoded by EFT1; catalyzes ribosomal translocation during protein synthesis; contains diphthamide, the unique posttranslationally modified histidine residue specifically ADP-ribosylated by diphtheria toxin
YDR385W	R.AEQLYEGPADDANC@IAIKNC@DPK.A	EFT2	4.444	1296.59	0.46	Elongation factor 2 (EF-2), also encoded by EFT1; catalyzes ribosomal translocation during protein synthesis; contains diphthamide, the unique posttranslationally modified histidine residue specifically ADP-ribosylated by diphtheria toxin
YDR385W	R.FVEPIDD#CPAGNIIGLVGIDQFLLK.T	EFT2	7.568	915.151	0.32	Elongation factor 2 (EF-2), also encoded by EFT1; catalyzes ribosomal translocation during protein synthesis; contains diphthamide, the unique posttranslationally modified histidine residue specifically ADP-ribosylated by diphtheria toxin
YDR399W	K.QYISYNNVHQLC@QVSAER.I	HPT1	3.993	737.02	-0.23	Dimeric hypoxanthine-guanine phosphoribosyltransferase, catalyzes the formation of both inosine monophosphate and guanosine monophosphate; mutations in the human homolog HPRT1 can cause Lesch-Nyhan syndrome and Kelley-Seegmiller syndrome
YDR418W	K.EILGTAQSVGC@R.V	RPL12B	3.239	645.827	-0.12	Protein component of the large (60S) ribosomal subunit, nearly identical to Rpl12Ap; rpl12a rpl12b double mutant exhibits slow growth and slow translation; has similarity to E. coli L11 and rat L12 ribosomal proteins
YDR432W	K.NLPEGC@SWQDLK.D	NPL3	2.512	723.838	0	RNA-binding protein that carries poly(A)+ mRNA from the nucleus into the cytoplasm; dissociation from mRNAs is promoted by Mtr10p; phosphorylated by Sky1p in the cytoplasm
YDR447C	K.RLCD#EIATIQSK.R	RPS17B	2.108	478.586	0.32	Ribosomal protein 51 (rp51) of the small (40s) subunit; nearly identical to Rps17Ap and has similarity to rat S17 ribosomal protein
YDR450W	R.YSNLVC@K.K	RPS18A	2.711	442.221	0.04	Protein component of the small (40S) ribosomal subunit; nearly identical to Rps18Bp and has similarity to E. coli S13 and rat S18 ribosomal proteins
YDR487C	K.SFLKPGHIC@PLR.A	RIB3	2.281	475.599	-0.03	3,4-dihydroxy-2-butanone-4-phosphate synthase (DHBP synthase), required for riboflavin biosynthesis from ribulose-5-phosphate, also has an unrelated function in mitochondrial respiration
YDR487C	R.LNDC@QAFGKK.H	RIB3	3.337	590.793	0.2	3,4-dihydroxy-2-butanone-4-phosphate synthase (DHBP synthase), required for riboflavin biosynthesis from ribulose-5-phosphate, also has an unrelated function in mitochondrial respiration
YDR500C	K.KTC@SSCGY#PSAK.T	RPL37B	3.179	673.297	0	Protein component of the large (60S) ribosomal subunit, has similarity to Rpl37Ap and to rat L37 ribosomal protein
YDR500C	K.TC@SSC@GYPSAK.T	RPL37B	3.594	609.25	-0.02	Protein component of the large (60S) ribosomal subunit, has similarity to Rpl37Ap and to rat L37 ribosomal protein
YEL037C	K.LAQSISCE#ESQIK.L	RAD23	4.346	746.869	-0.3	Protein with ubiquitin-like N terminus, recognizes and binds damaged DNA (with Rad4p) during nucleotide excision repair; regulates Rad4p levels, subunit of Nuclear Excision Repair Factor 2 (NEF2); homolog of human HR23A and HR23B proteins
YEL040W	R.YSFSHDSC@MPVPIC@K.S	UTR2	4.474	914.396	-1.14	Cell wall protein that functions in the transfer of chitin to beta(1-6)glucan; putative chitin transglycosidase; glycosylphosphatidylinositol (GPI)-anchored protein localized to the bud neck; has a role in cell wall maintenance
YEL047C	K.ASSGINGAC@TETQR.H	YEL047C	4.074	726.33	-0.53	Soluble fumarate reductase, required with isoenzyme Osm1p for anaerobic growth; may interact with ribosomes, based on co-purification experiments; authentic, non-tagged protein is detected in purified mitochondria in high-throughput studies
YEL071W	K.SVPTAC@NSYGGMYK.Y	DLD3	2.694	775.834	-0.12	D-lactate dehydrogenase, part of the retrograde regulon which consists of genes whose expression is stimulated by damage to mitochondria and reduced in cells grown with glutamate as the sole nitrogen source, located in the cytoplasm
YER023W	K.H#QVCTPGGTTIAGLC@VMEEK.G	PRO3	4.295	735.343	-0.04	Delta 1-pyrroline-5-carboxylate reductase, catalyzes the last step in proline biosynthesis
YER023W	K.HQVC@TPGGTTIAGLC@VMEEK.G	PRO3	5.072	735.343	-0.14	Delta 1-pyrroline-5-carboxylate reductase, catalyzes the last step in proline biosynthesis
YER025W	K.C@QEPTC@PEPDC@YR.S	GCD11	4.218	856.329	-0.09	Gamma subunit of the translation initiation factor eIF2, involved in the identification of the start codon; binds GTP when forming the ternary complex with GTP and tRNAi-Met
YER025W	K.C]QRPGC@PGR.Y	GCD11	2.252	363.168	-0.17	Gamma subunit of the translation initiation factor eIF2, involved in the identification of the start codon; binds GTP when forming the ternary complex with GTP and tRNAi-Met
YER025W	R.LQLTSPAC@TEINEK.I	GCD11	4.026	802.403	0.05	Gamma subunit of the translation initiation factor eIF2, involved in the identification of the start codon; binds GTP when forming the ternary complex with GTP and tRNAi-Met
YER043C	K.FDNLYGC@R.E	SAH1	2.685	522.732	-0.7	S-adenosyl-L-homocysteine hydrolase, catabolizes S-adenosyl-L-homocysteine which is formed after donation of the activated methyl group of S-adenosyl-L-methionine (AdoMet) to an acceptor
YER043C	K.SKFDNLYGC@R.E	SAH1	3.165	630.296	0.06	S-adenosyl-L-homocysteine hydrolase, catabolizes S-adenosyl-L-homocysteine which is formed after donation of the activated methyl group of S-adenosyl-L-methionine (AdoMet) to an acceptor
YER052C	K.HYSKPDGPNNNVAVVC@SAR.S	HOM3	2.872	695.67	0.51	Aspartate kinase (L-aspartate 4-P-transferase); cytoplasmic enzyme that catalyzes the first step in the common pathway for methionine and threonine biosynthesis; expression regulated by Gcn4p and the general control of amino acid synthesis
YER052C	K.HYSKPDGPNNNVAVVCSAR[.S	HOM3	2.874	695.67	0.51	Aspartate kinase (L-aspartate 4-P-transferase); cytoplasmic enzyme that catalyzes the first step in the common pathway for methionine and threonine biosynthesis; expression regulated by Gcn4p and the general control of amino acid synthesis
YER056C-A	K.C@GDC@GSALQGISTLRPR.Q	RPL34A	3.353	616.633	0.23	Protein component of the large (60S) ribosomal subunit, nearly identical to Rpl34Bp and has similarity to rat L34 ribosomal protein
YER062C	K.EKGC@DIIVK.N	HOR2	2.394	531.287	0.02	One of two redundant DL-glycerol-3-phosphatases (RHR2/GPP1 encodes the other) involved in glycerol biosynthesis; induced in response to hyperosmotic stress and oxidative stress, and during the diauxic transition
YER062C	K.LC@NALNALPK.E	HOR2	3.191	557.308	0.34	One of two redundant DL-glycerol-3-phosphatases (RHR2/GPP1 encodes the other) involved in glycerol biosynthesis; induced in response to hyperosmotic stress and oxidative stress, and during the diauxic transition
YER069W	K.F]VC@SDAAWLNNVTD#NVFNVLRR.D	ARG5	3.75	908.782	-0.04	Protein that is processed in the mitochondrion to yield acetylglutamate kinase and N-acetyl-gamma-glutamyl-phosphate reductase, which catalyze the 2nd and 3rd steps in arginine biosynthesis; enzymes form a complex with Arg2p
YER086W	K.IPATIVMPVC@TPSIK.Y	ILV1	4.234	821.948	-1.35	Threonine deaminase, catalyzes the first step in isoleucine biosynthesis; expression is under general amino acid control; ILV1 locus exhibits highly positioned nucleosomes whose organization is independent of known ILV1 regulation
YER089C	K.SQNLLVC@GNAGDSR.T	PTC2	3.839	745.855	0.38	Type 2C protein phosphatase; dephosphorylates Hog1p to limit maximal osmostress induced kinase activity; dephosphorylates Ire1p to downregulate the unfolded protein response; dephosphorylates Cdc28p; role in DNA checkpoint inactivation
YER091C	K.FWVNPDC@GLK.T	MET6	2.876	618.298	0.29	Cobalamin-independent methionine synthase, involved in amino acid biosynthesis; requires a minimum of two glutamates on the methyltetrahydrofolate substrate, similar to bacterial metE homologs
YER091C	K.GMLTGPITC@LR.W	MET6	3.573	617.818	0.52	Cobalamin-independent methionine synthase, involved in amino acid biosynthesis; requires a minimum of two glutamates on the methyltetrahydrofolate substrate, similar to bacterial metE homologs
YER091C	K.TQIHSHFC@YSDLDPNHIK.A	MET6	3.827	553.761	-0.18	Cobalamin-independent methionine synthase, involved in amino acid biosynthesis; requires a minimum of two glutamates on the methyltetrahydrofolate substrate, similar to bacterial metE homologs
YER107C	R.FVQC@GPSNTEC@IVTGSWDK.T	GLE2	5.517	1092.99	-0.61	Component of the nuclear pore complex required for polyadenylated RNA export but not for protein import, homologous to S. pombe Rae1p
YER110C	R.AYANASGC@VAR.M	KAP123	3.421	570.267	0.01	Karyopherin beta, mediates nuclear import of ribosomal proteins prior to assembly into ribosomes and import of histones H3 and H4; localizes to the nuclear pore, nucleus, and cytoplasm; exhibits genetic interactions with RAI1
YER131W	K.LHYC@VSC@AIHAR.I	RPS26B	3.807	496.239	-0.49	Protein component of the small (40S) ribosomal subunit; nearly identical to Rps26Ap and has similarity to rat S26 ribosomal protein
YER131W	R.GHVKPVR.C	RPS26B	1.468	396.745	-0.68	Protein component of the small (40S) ribosomal subunit; nearly identical to Rps26Ap and has similarity to rat S26 ribosomal protein
YER136W	K.APLVIADPTYFPEK.C	GDI1	4.637	780.919	-0.17	GDP dissociation inhibitor, regulates vesicle traffic in secretory pathways by regulating the dissociation of GDP from the Sec4/Ypt/rab family of GTP binding proteins
YER151C	K.SFQH#CATADAVKPDEFYK.T	UBP3	4.66	705.327	0.18	Ubiquitin-specific protease that interacts with Bre5p to co-regulate anterograde and retrograde transport between endoplasmic reticulum and Golgi compartments; inhibitor of gene silencing; cleaves ubiquitin fusions but not polyubiquitin
YER165W	K.GFGFVC@FSTPEEATK.A	PAB1	4.911	838.885	-0.05	Poly(A) binding protein, part of the 3'-end RNA-processing complex, mediates interactions between the 5' cap structure and the 3' mRNA poly(A) tail, involved in control of poly(A) tail length, interacts with translation factor eIF-4G
YFL018C	K.AAQLGFNTAC@VEK.R	LPD1	3.882	704.848	-0.31	Dihydrolipoamide dehydrogenase, the lipoamide dehydrogenase component (E3) of the pyruvate dehydrogenase and 2-oxoglutarate dehydrogenase multi-enzyme complexes
YFL018C	K.LGGTC@LNVGC@IPSK.A	LPD1	3.843	738.371	-0.22	Dihydrolipoamide dehydrogenase, the lipoamide dehydrogenase component (E3) of the pyruvate dehydrogenase and 2-oxoglutarate dehydrogenase multi-enzyme complexes
YFL021W	K.SSTSVQSSATPPSNTSSNPDIK.C	GAT1	2.347	1096.52	-0.62	Transcriptional activator of genes involved in nitrogen catabolite repression; contains a GATA-1-type zinc finger DNA-binding motif; activity and localization regulated by nitrogen limitation and Ure2p
YFL037W	R.E#AEGCDSLQGFQITHSLGGGTGSGMGTLLISK.I	TUB2	4.643	1075.51	-0.45	Beta-tubulin; associates with alpha-tubulin (Tub1p and Tub3p) to form tubulin dimer, which polymerizes to form microtubules
YFL037W	R.EAEGC@DSLQGFQITHSLGGGTGSGMGTLLISK.I	TUB2	4.033	1075.51	-0.71	Beta-tubulin; associates with alpha-tubulin (Tub1p and Tub3p) to form tubulin dimer, which polymerizes to form microtubules
YFL039C	K.QEYDESGPSIVHHK.C	ACT1	2.407	542.59	0.13	Actin, structural protein involved in cell polarization, endocytosis, and other cytoskeletal functions
YFL039C	R.FRAPEALFHPSVLGLESAGIDQTTYNSIMK.C	ACT1	3.209	827.921	0.03	Actin, structural protein involved in cell polarization, endocytosis, and other cytoskeletal functions
YFL045C	K.C]C@IGFVGGSDLSK.Q	SEC53	4.033	700.321	0.64	Phosphomannomutase, involved in synthesis of GDP-mannose and dolichol-phosphate-mannose; required for folding and glycosylation of secretory proteins in the ER lumen
YFL045C	K.TYC@LQHVEK.D	SEC53	2.715	589.287	0.13	Phosphomannomutase, involved in synthesis of GDP-mannose and dolichol-phosphate-mannose; required for folding and glycosylation of secretory proteins in the ER lumen
YFL045C	R.NKC@C@IGFVGGSDLSK.Q	SEC53	4.753	821.389	-0.83	Phosphomannomutase, involved in synthesis of GDP-mannose and dolichol-phosphate-mannose; required for folding and glycosylation of secretory proteins in the ER lumen
YFR006W	R.QYTSDITR.C	YFR006W	2.18	492.243	0.12	Putative X-Pro aminopeptidase; green fluorescent protein (GFP)-fusion protein localizes to the cytoplasm; YFR006W is not an essential gene
YFR037C	K.VYIC@HTC@GNESINVR.Y	RSC8	3.679	911.421	-0.76	Component of the RSC chromatin remodeling complex; essential for viability and mitotic growth; homolog of SWI/SNF subunit Swi3p, but unlike Swi3p, does not activate transcription of reporters
YFR053C	K.LADDIPSNSPMAINC@EYGSFDNEHLVLPR.T	HXK1	2.9	1097.51	-0.4	Hexokinase isoenzyme 1, a cytosolic protein that catalyzes phosphorylation of glucose during glucose metabolism; expression is highest during growth on non-glucose carbon sources; glucose-induced repression involves the hexokinase Hxk2p
YFR053C	R.LAVC@GIAAIC@QK.R	HXK1	4.588	652.347	0.58	Hexokinase isoenzyme 1, a cytosolic protein that catalyzes phosphorylation of glucose during glucose metabolism; expression is highest during growth on non-glucose carbon sources; glucose-induced repression involves the hexokinase Hxk2p
YGL008C	K.KVTAVVESPEGE#RIVCVK.G	PMA1	4.157	667.366	-0.74	Plasma membrane H+-ATPase, pumps protons out of the cell; major regulator of cytoplasmic pH and plasma membrane potential; part of the P2 subgroup of cation-transporting ATPases
YGL009C	K.VFIGSC@TNGR.I	LEU1	2.442	555.772	-0.25	Isopropylmalate isomerase, catalyzes the second step in the leucine biosynthesis pathway
YGL009C	R.EAGC@SIC@LGMNPDILDAYER.C	LEU1	4.556	1150.5	-1.18	Isopropylmalate isomerase, catalyzes the second step in the leucine biosynthesis pathway
YGL009C	R.RVDC@TLATVDHNIPTESRK.N	LEU1	4.495	738.043	-0.41	Isopropylmalate isomerase, catalyzes the second step in the leucine biosynthesis pathway
YGL009C	R.VDC@TLATVDHNIPTESRK.N	LEU1	3.462	1028.51	0.83	Isopropylmalate isomerase, catalyzes the second step in the leucine biosynthesis pathway
YGL026C	K.IVTLCGD#APEGK.R	TRP5	3.766	630.319	-0.13	Tryptophan synthase involved in tryptophan biosynthesis, regulated by the general control system of amino acid biosynthesis
YGL026C	K.NVIAETGAGQHGVATATAC@AK.F	TRP5	3.472	676.337	-0.49	Tryptophan synthase involved in tryptophan biosynthesis, regulated by the general control system of amino acid biosynthesis
YGL026C	R.FGDFGGQYVPEALHACLR[.E	TRP5	3.477	679.659	-0.55	Tryptophan synthase involved in tryptophan biosynthesis, regulated by the general control system of amino acid biosynthesis
YGL037C	K.DKEPYSTYTYHSPRPGDDSTQEGILWPVH#CVK.N	PNC1	4.356	1254.92	0.62	Nicotinamidase that converts nicotinamide to nicotinic acid as part of the NAD(+) salvage pathway, required for life span extension by calorie restriction; PNC1 expression responds to all known stimuli that extend replicative life span
YGL043W	K.VNNC@DTNEAAYK.A	DST1	3.064	699.801	-0.85	General transcription elongation factor TFIIS, enables RNA polymerase II to read through blocks to elongation by stimulating cleavage of nascent transcripts stalled at transcription arrest sites
YGL043W	R.SADEPLTTFC@TC@EAC@GNR.W	DST1	4.417	1044.92	0.23	General transcription elongation factor TFIIS, enables RNA polymerase II to read through blocks to elongation by stimulating cleavage of nascent transcripts stalled at transcription arrest sites
YGL087C	R.IYSLSIDCGPNY#PDSPPK.V	MMS2	4.738	1011.98	-0.81	Protein involved in error-free postreplication DNA repair; forms a heteromeric complex with Ubc13p that has a ubiquitin-conjugating activity; cooperates with chromatin-associated RING finger proteins, Rad18p and Rad5p
YGL135W	K.LPNC@PRPNMSIC@IFGDAFDVDRAK.S	RPL1B	4.873	937.111	-1.3	N-terminally acetylated protein component of the large (60S) ribosomal subunit, nearly identical to Rpl1Ap and has similarity to E. coli L1 and rat L10a ribosomal proteins; rpl1a rpl1b double null mutation is lethal
YGL135W	K.S]CGVDAMSVDDLKK.L	RPL1B	4.315	770.853	0.17	N-terminally acetylated protein component of the large (60S) ribosomal subunit, nearly identical to Rpl1Ap and has similarity to E. coli L1 and rat L10a ribosomal proteins; rpl1a rpl1b double null mutation is lethal
YGL135W	K.SC@GVDAMSVDDLK.K	RPL1B	4.096	706.804	-2.04	N-terminally acetylated protein component of the large (60S) ribosomal subunit, nearly identical to Rpl1Ap and has similarity to E. coli L1 and rat L10a ribosomal proteins; rpl1a rpl1b double null mutation is lethal
YGL173C	R.KGEIKPSSGTNSTEC@QSPK.S	KEM1	3.869	678.997	-0.12	Evolutionarily-conserved 5'-3' exonuclease component of cytoplasmic processing (P) bodies involved in mRNA decay; plays a role in microtubule-mediated processes, filamentous growth, ribosomal RNA maturation, and telomere maintenance
YGL195W	K.YSPEVFIC@R.F	GCN1	2.086	585.785	0.61	Positive regulator of the Gcn2p kinase activity, forms a complex with Gcn20p; proposed to stimulate Gcn2p activation by an uncharged tRNA
YGL202W	R.DC@AIDALYK.Y	ARO8	2.814	534.755	-0.07	Aromatic aminotransferase I, expression is regulated by general control of amino acid biosynthesis
YGL206C	K.LVNDAC@IEKK.E	CHC1	3.171	595.317	1.27	Clathrin heavy chain, subunit of the major coat protein involved in intracellular protein transport and endocytosis; two heavy chains form the clathrin triskelion structural component; the light chain (CLC1) is thought to regulate function
YGL221C	K.TVIVC@NHSNTER.G	NIF3	3.873	715.346	-0.18	Protein of unknown function, similar to Listeria monocytogenes major sigma factor (rpoD gene product); the authentic, non-tagged protein is detected in highly purified mitochondria in high-throughput studies
YGL221C	K.VAVC@AGSGSGVFK.Q	NIF3	3.417	619.814	0.61	Protein of unknown function, similar to Listeria monocytogenes major sigma factor (rpoD gene product); the authentic, non-tagged protein is detected in highly purified mitochondria in high-throughput studies
YGL232W	K.VSSGFLDPGTSGIYATC@SR.R	TAN1	4.724	987.966	0.68	Putative tRNA acetyltransferase, RNA-binding protein required for the formation of the modified nucleoside N(4)-acetylcytidine in serine and leucine tRNAs but not required for the same modification in 18S rRNA
YGL234W	K.DAPGC@VIENGTK.L	ADE5	3.177	630.799	0.7	Bifunctional enzyme of the 'de novo' purine nucleotide biosynthetic pathway, contains aminoimidazole ribotide synthetase and glycinamide ribotide synthetase activities
YGL245W	K.AYC@DDTPTEK.M	GUS1	3.219	600.248	-0.12	Glutamyl-tRNA synthetase (GluRS), forms a complex with methionyl-tRNA synthetase (Mes1p) and Arc1p; complex formation increases the catalytic efficiency of both tRNA synthetases and ensures their correct localization to the cytoplasm
YGL245W	K.IYPTYDFC@VPIVDAIEGVTHALR.T	GUS1	1.795	883.784	-0.41	Glutamyl-tRNA synthetase (GluRS), forms a complex with methionyl-tRNA synthetase (Mes1p) and Arc1p; complex formation increases the catalytic efficiency of both tRNA synthetases and ensures their correct localization to the cytoplasm
YGL253W	K.LSDDIPPSAPMAINC@EYGSFDNEHVVLPR.T	HXK2	3.175	1087.17	0.01	Hexokinase isoenzyme 2 that catalyzes phosphorylation of glucose in the cytosol; predominant hexokinase during growth on glucose; functions in the nucleus to repress expression of HXK1 and GLK1 and to induce expression of its own gene
YGL253W	R.LSVC@GIAAIC@QK.R	HXK2	4.051	660.344	-0.13	Hexokinase isoenzyme 2 that catalyzes phosphorylation of glucose in the cytosol; predominant hexokinase during growth on glucose; functions in the nucleus to repress expression of HXK1 and GLK1 and to induce expression of its own gene
YGR019W	K.LNGC@NVGGC@AVHAVR.L	UGA1	2.547	528.589	0.07	Gamma-aminobutyrate (GABA) transaminase (4-aminobutyrate aminotransferase) involved in the 4-aminobutyrate and glutamate degradation pathways; required for normal oxidative stress tolerance and nitrogen utilization
YGR032W	K.HC@EYYQC@GK.G	GSC2	2.375	622.745	-0.4	Catalytic subunit of 1,3-beta-glucan synthase, involved in formation of the inner layer of the spore wall; activity positively regulated by Rho1p and negatively by Smk1p; has similarity to an alternate catalytic subunit, Fks1p (Gsc1p)
YGR054W	K.DC@VSEDIVPAYEYQAK.S	YGR054W	5.08	943.927	-0.2	Eukaryotic initiation factor (eIF) 2A; associates specifically with both 40S subunits and 80 S ribosomes, and interacts genetically with both eIF5b and eIF4E; homologous to mammalian eIF2A
YGR061C	K.ATNIAHVC@GLQDK.V	ADE6	2.225	476.242	-0.05	Formylglycinamidine-ribonucleotide (FGAM)-synthetase, catalyzes a step in the 'de novo' purine nucleotide biosynthetic pathway
YGR061C	R.LKDIIPGC@ENWPSFER.N	ADE6	3.564	654.324	-0.7	Formylglycinamidine-ribonucleotide (FGAM)-synthetase, catalyzes a step in the 'de novo' purine nucleotide biosynthetic pathway
YGR061C	R.QDTFAFGAC@NGC@QFLSR.L	ADE6	4.531	989.93	-0.53	Formylglycinamidine-ribonucleotide (FGAM)-synthetase, catalyzes a step in the 'de novo' purine nucleotide biosynthetic pathway
YGR061C	R.VC@MVQISQEK.D	ADE6	3.202	611.302	0.23	Formylglycinamidine-ribonucleotide (FGAM)-synthetase, catalyzes a step in the 'de novo' purine nucleotide biosynthetic pathway
YGR094W	K.ESYPNGIPQC@GTDAMR.F	VAS1	2.77	906.388	0.22	Mitochondrial and cytoplasmic valyl-tRNA synthetase
YGR094W	K.NLYVGQEDNEMTIPTC@SR.S	VAS1	4.535	1071.97	-0.97	Mitochondrial and cytoplasmic valyl-tRNA synthetase
YGR118W	K.VTAFVPNDGC@LNFVDENDEVLLAGFGR.K	RPS23A	4.741	990.142	-0.97	Ribosomal protein 28 (rp28) of the small (40S) ribosomal subunit, required for translational accuracy; nearly identical to Rps23Bp and similar to E. coli S12 and rat S23 ribosomal proteins; deletion of both RPS23A and RPS23B is lethal
YGR124W	K.ADWGC@AEDPSGR.Y	ASN2	3.817	660.768	0.54	Asparagine synthetase, isozyme of Asn1p; catalyzes the synthesis of L-asparagine from L-aspartate in the asparagine biosynthetic pathway
YGR124W	K.NLHLADC@LR.A	ASN2	2.498	556.287	-0.12	Asparagine synthetase, isozyme of Asn1p; catalyzes the synthesis of L-asparagine from L-aspartate in the asparagine biosynthetic pathway
YGR124W	R.SSQSPETVYFASELK.C	ASN2	3.446	836.907	0.47	Asparagine synthetase, isozyme of Asn1p; catalyzes the synthesis of L-asparagine from L-aspartate in the asparagine biosynthetic pathway
YGR159C	K.EIDGRPINC@DMSTSKPAGNNDR.A	NSR1	4.112	821.705	0.5	Nucleolar protein that binds nuclear localization sequences, required for pre-rRNA processing and ribosome biogenesis
YGR159C	K.EIDGRPINCD#MSTSKPAGNNDR.A	NSR1	4.364	821.705	0.4	Nucleolar protein that binds nuclear localization sequences, required for pre-rRNA processing and ribosome biogenesis
YGR175C	R.ILC@AYNSPK.V	ERG1	3.117	533.273	-0.68	Squalene epoxidase, catalyzes the epoxidation of squalene to 2,3-oxidosqualene; plays an essential role in the ergosterol-biosynthesis pathway and is the specific target of the antifungal drug terbinafine
YGR181W	R.NDAC@IDQC@LAK.Y	TIM13	3.926	654.29	0.15	Mitochondrial intermembrane space protein, forms a complex with TIm8p that mediates import and insertion of a subset of polytopic inner membrane proteins; may prevent aggregation of incoming proteins in a chaperone-like manner
YGR187C	K.NVENEDIGELC@YR.I	HGH1	3.467	805.859	-1.02	Nonessential protein of unknown function; green fluorescent protein (GFP)-fusion protein localizes to the cytoplasm; similar to mammalian BRP16 (Brain protein 16)
YGR192C	K.I]VSNASC@TTNC@LAPLAK.V	TDH3	4.538	938.966	-0.32	Glyceraldehyde-3-phosphate dehydrogenase, isozyme 3, involved in glycolysis and gluconeogenesis; tetramer that catalyzes the reaction of glyceraldehyde-3-phosphate to 1,3 bis-phosphoglycerate; detected in the cytoplasm and cell-wall
YGR192C	K.IVSNASC@TTNC@LAPLAK#.V	TDH3	4.356	938.966	-0.4	Glyceraldehyde-3-phosphate dehydrogenase, isozyme 3, involved in glycolysis and gluconeogenesis; tetramer that catalyzes the reaction of glyceraldehyde-3-phosphate to 1,3 bis-phosphoglycerate; detected in the cytoplasm and cell-wall
YGR192C	K.IVSNASC@TTNC@LAPLAK.V	TDH3	6.354	910.454	-1.7	Glyceraldehyde-3-phosphate dehydrogenase, isozyme 3, involved in glycolysis and gluconeogenesis; tetramer that catalyzes the reaction of glyceraldehyde-3-phosphate to 1,3 bis-phosphoglycerate; detected in the cytoplasm and cell-wall
YGR204W	K.A]CAQQFR.S	ADE3	2.359	440.709	0.42	Cytoplasmic trifunctional enzyme C1-tetrahydrofolate synthase, involved in single carbon metabolism and required for biosynthesis of purines, thymidylate, methionine, and histidine
YGR204W	K.C@VGDVEFNEAIK.Y	ADE3	4.101	690.827	-0.09	Cytoplasmic trifunctional enzyme C1-tetrahydrofolate synthase, involved in single carbon metabolism and required for biosynthesis of purines, thymidylate, methionine, and histidine
YGR204W	K.EQGFGNLPIC@IAK.T	ADE3	2.815	723.874	0.01	Cytoplasmic trifunctional enzyme C1-tetrahydrofolate synthase, involved in single carbon metabolism and required for biosynthesis of purines, thymidylate, methionine, and histidine
YGR207C	K.GIDTC@SLIDSVGK.E	YGR207C	3.679	682.84	0.4	Protein that interacts with frataxin (Yfh1p); putative homolog of mammalian electron transfer flavoprotein complex subunit ETF-beta; authentic, non-tagged protein is detected in highly purified mitochondria in high-throughput studies
YGR214W	K.EASYVNIPVIALTDLDSPSEFVDVAIPC@NNR.G	RPS0A	4.317	1140.23	-0.94	Protein component of the small (40S) ribosomal subunit, nearly identical to Rps0Bp; required for maturation of 18S rRNA along with Rps0Bp; deletion of either RPS0 gene reduces growth rate, deletion of both genes is lethal
YGR234W	K.C@NPNRPIYWIQSSYDEK.T	YHB1	4.392	724.006	0.59	Nitric oxide oxidoreductase, flavohemoglobin involved in nitric oxide detoxification; plays a role in the oxidative and nitrosative stress responses
YGR234W	R.HYSLC@SASTK.N	YHB1	2.758	577.269	-0.52	Nitric oxide oxidoreductase, flavohemoglobin involved in nitric oxide detoxification; plays a role in the oxidative and nitrosative stress responses
YGR240C	-.MQSQDSC@YGVAFR.S	PFK1	4.216	782.829	-0.53	Alpha subunit of heterooctameric phosphofructokinase involved in glycolysis, indispensable for anaerobic growth, activated by fructose-2,6-bisphosphate and AMP, mutation inhibits glucose induction of cell cycle-related genes
YGR254W	K.IGLDC@ASSEFFK.D	ENO1	4.034	687.324	0.71	Enolase I, a phosphopyruvate hydratase that catalyzes the conversion of 2-phosphoglycerate to phosphoenolpyruvate during glycolysis and the reverse reaction during gluconeogenesis; expression is repressed in response to glucose
YGR254W	K.IGLDC@ASSEFFKDGK.Y	ENO1	4.965	837.394	-1.95	Enolase I, a phosphopyruvate hydratase that catalyzes the conversion of 2-phosphoglycerate to phosphoenolpyruvate during glycolysis and the reverse reaction during gluconeogenesis; expression is repressed in response to glucose
YGR264C	R.CK#LDDASPEPK.Y	MES1	3.293	630.3	-0.44	Methionyl-tRNA synthetase, forms a complex with glutamyl-tRNA synthetase (Gus1p) and Arc1p, which increases the catalytic efficiency of both tRNA synthetases; also has a role in nuclear export of tRNAs
YGR277C	K.SSASPTC@TPQNPCV[.-	YGR277C	2.956	753.321	-0.39	Putative pantetheine-phosphate adenylyltransferase (PPAT) that catalyzes the fourth step in the biosynthesis of coenzyme A from pantothenate; conserved in bacteria, humans, and plants; essential for viability
YGR285C	R.AQYDSC@DFVADVPPPK.K	ZUO1	5.168	904.912	0.14	Cytosolic ribosome-associated chaperone that acts, together with Ssz1p and the Ssb proteins, as a chaperone for nascent polypeptide chains; contains a DnaJ domain and functions as a J-protein partner for Ssb1p and Ssb2p
YHL011C	R.VVC@TNTVPFEEK.I	PRS3	3.391	711.85	0.15	5-phospho-ribosyl-1(alpha)-pyrophosphate synthetase, synthesizes PRPP, which is required for nucleotide, histidine, and tryptophan biosynthesis; one of five related enzymes, which are active as heteromultimeric complexes
YHR007C	K.GVIYDC@PNSR.L	ERG11	2.984	590.774	-1.3	Lanosterol 14-alpha-demethylase, catalyzes the C-14 demethylation of lanosterol to form 4,4''-dimethyl cholesta-8,14,24-triene-3-beta-ol in the ergosterol biosynthesis pathway; member of the cytochrome P450 family
YHR012W	K.IGC@C@SGYTVVPK.N	VPS29	3.83	670.82	-0.16	Endosomal protein that is a subunit of the membrane-associated retromer complex essential for endosome-to-Golgi retrograde transport; forms a subcomplex with Vps35p and Vps26p that selects cargo proteins for endosome-to-Golgi retrieval
YHR019C	K.YGTC@PHGGYGIGTER.I	DED81	4.108	542.244	-0.09	Cytosolic asparaginyl-tRNA synthetase, required for protein synthesis, catalyzes the specific attachment of asparagine to its cognate tRNA
YHR019C	R.KYGTC@PHGGYGIGTER.I	DED81	2.967	584.942	0.04	Cytosolic asparaginyl-tRNA synthetase, required for protein synthesis, catalyzes the specific attachment of asparagine to its cognate tRNA
YHR020W	K.FAGGDFTTTCE#GYIPQTGR.G	YHR020W	2.653	693.314	-0.2	Protein of unknown function that may interact with ribosomes, based on co-purification experiments; has similarity to proline-tRNA ligase; YHR020W is an essential gene
YHR020W	K.S]LCIPFDQPVLNEGQK.C	YHR020W	4.268	922.964	0.29	Protein of unknown function that may interact with ribosomes, based on co-purification experiments; has similarity to proline-tRNA ligase; YHR020W is an essential gene
YHR020W	R.IAVNYC@MFGR.S	YHR020W	2.671	623.789	-0.18	Protein of unknown function that may interact with ribosomes, based on co-purification experiments; has similarity to proline-tRNA ligase; YHR020W is an essential gene
YHR021C	R.SYFLDVK.C	RPS27B	2.405	436.232	1.13	Protein component of the small (40S) ribosomal subunit; nearly identical to Rps27Ap and has similarity to rat S27 ribosomal protein
YHR025W	K.YQWNPAIK.C	THR1	1.547	510.269	0.08	Homoserine kinase, conserved protein required for threonine biosynthesis; expression is regulated by the GCN4-mediated general amino acid control pathway
YHR025W	R.TALYVLR.C	THR1	2.28	418.256	0.22	Homoserine kinase, conserved protein required for threonine biosynthesis; expression is regulated by the GCN4-mediated general amino acid control pathway
YHR037W	K.C]TGAVVSQQWFGGAR.M	PUT2	4.43	812.389	0.54	Delta-1-pyrroline-5-carboxylate dehydrogenase, nuclear-encoded mitochondrial protein involved in utilization of proline as sole nitrogen source; deficiency of the human homolog causes HPII, an autosomal recessive inborn error of metabolism
YHR039C	K.FGGEEGLLGLC@NAK.S	MSC7	3.903	732.861	0.2	Protein of unknown function, green fluorescent protein (GFP)-fusion protein localizes to the endoplasmic reticulum; msc7 mutants are defective in directing meiotic recombination events to homologous chromatids
YHR049W	K.ANVQC@DYIDAPVLLEK.K	FSH1	5.234	924.465	1.22	Serine hydrolase that localizes to both the nucleus and cytoplasm; sequence is similar to Fsh2p and Fsh3p
YHR064C	K.C@ANGAPAVEVDGK.V	SSZ1	3.401	644.303	-1.48	Hsp70 protein that interacts with Zuo1p (a DnaJ homolog) to form a ribosome-associated complex that binds the ribosome via the Zuo1p subunit; also involved in pleiotropic drug resistance via sequential activation of PDR1 and PDR5; binds ATP
YHR068W	K.HGADC@LEANQDVDSPIWTPSK.M	DYS1	4.018	780.69	-0.5	Deoxyhypusine synthase, catalyzes formation of deoxyhypusine, the first step in hypusine biosynthesis; triggers posttranslational hypusination of translation elongation factor eIF-5A and regulates its intracellular levels; tetrameric
YHR068W	K.KGC@FDEEGYQK.T	DYS1	4.363	680.796	0.15	Deoxyhypusine synthase, catalyzes formation of deoxyhypusine, the first step in hypusine biosynthesis; triggers posttranslational hypusination of translation elongation factor eIF-5A and regulates its intracellular levels; tetrameric
YHR068W	K.MVDAVVTSAGGVEEDLIK.C	DYS1	4.628	924.965	-2.02	Deoxyhypusine synthase, catalyzes formation of deoxyhypusine, the first step in hypusine biosynthesis; triggers posttranslational hypusination of translation elongation factor eIF-5A and regulates its intracellular levels; tetrameric
YHR089C	K.C@GDGVQATSFKEGDK.F	GAR1	4.124	533.575	-0.19	Protein component of the H/ACA snoRNP pseudouridylase complex, involved in the modification and cleavage of the 18S pre-rRNA
YHR104W	R.LFDGAC@DYGNEK.E	GRE3	4.114	694.793	-0.3	Aldose reductase involved in methylglyoxal, d-xylose and arabinose metabolism; stress induced (osmotic, ionic, oxidative, heat shock, starvation and heavy metals); regulated by the HOG pathway
YHR112C	K.CASEGDIVH#LESPVNPYGTSSDIESLAR.R	YHR112C	5.664	1001.8	-0.42	Putative protein of unknown function; green fluorescent protein (GFP)-fusion protein localizes to the cytoplasm
YHR112C	R.NYGIEQHPLEDIEK.C	YHR112C	4.465	842.913	0.07	Putative protein of unknown function; green fluorescent protein (GFP)-fusion protein localizes to the cytoplasm
YHR128W	K.IC@GVSIVR.A	FUR1	2.081	452.257	-0.46	Uracil phosphoribosyltransferase, synthesizes UMP from uracil; involved in the pyrimidine salvage pathway
YHR143W-A	K.YIC@AEC@SSK.L	RPC10	2.665	559.236	-0.25	RNA polymerase subunit, found in RNA polymerase complexes I, II, and III
YHR146W	R.IPEAGGLLC@GKPPR.S	CRP1	3.232	732.903	0.27	Protein that binds to cruciform DNA structures
YHR174W	K.VKIGLDC@ASSEFFK.D	ENO2	3.92	800.905	-0.35	Enolase II, a phosphopyruvate hydratase that catalyzes the conversion of 2-phosphoglycerate to phosphoenolpyruvate during glycolysis and the reverse reaction during gluconeogenesis; expression is induced in response to glucose
YHR183W	K.SDGEPC@CE#WVGPAGAGHYVK.M	GND1	2.848	725.979	-0.18	6-phosphogluconate dehydrogenase (decarboxylating), catalyzes an NADPH regenerating reaction in the pentose phosphate pathway; required for growth on D-glucono-delta-lactone and adaptation to oxidative stress
YHR183W	R.VLPEC@ASDNLPVDKDIHINWTGHGGNVSSSTYQA.-	GND1	4.017	1227.91	-0.92	6-phosphogluconate dehydrogenase (decarboxylating), catalyzes an NADPH regenerating reaction in the pentose phosphate pathway; required for growth on D-glucono-delta-lactone and adaptation to oxidative stress
YHR187W	R.FLSEIASPHCTMVATYHK.D	IKI1	2.546	509.499	-1.07	Subunit of Elongator complex, which is required for modification of wobble nucleosides in tRNA; iki1 mutations confer resistance to the K. lactis toxin zymocin
YHR208W	K.EIGWNNEDIHVPLLPGEQC@GALTK.Q	BAT1	3.6	897.446	-0.45	Mitochondrial branched-chain amino acid aminotransferase, homolog of murine ECA39; highly expressed during logarithmic phase and repressed during stationary phase
YHR208W	K.LGANYAPC@ILPQLQAAK.R	BAT1	4.21	914.493	0.28	Mitochondrial branched-chain amino acid aminotransferase, homolog of murine ECA39; highly expressed during logarithmic phase and repressed during stationary phase
YHR208W	K.LGANYAPC@ILPQLQAAKR.G	BAT1	2.181	662.031	-0.19	Mitochondrial branched-chain amino acid aminotransferase, homolog of murine ECA39; highly expressed during logarithmic phase and repressed during stationary phase
YHR208W	R.I]CLPTFESEELIK.L	BAT1	3.623	789.907	-0.84	Mitochondrial branched-chain amino acid aminotransferase, homolog of murine ECA39; highly expressed during logarithmic phase and repressed during stationary phase
YIL039W	R.EGLC@VDGPDTR.Y	TED1	3.216	609.774	-0.68	Conserved phosphoesterase domain-containing protein that acts together with Emp24p/Erv25p in cargo exit from the ER; deletion confers sensitivity to 4-(N-(S-glutathionylacetyl)amino) phenylarsenoxide (GSAO)
YIL039W	R.EGLC@VDGPDTRYYPDAHAPESYK.S	TED1	4.556	880.727	-0.4	Conserved phosphoesterase domain-containing protein that acts together with Emp24p/Erv25p in cargo exit from the ER; deletion confers sensitivity to 4-(N-(S-glutathionylacetyl)amino) phenylarsenoxide (GSAO)
YIL075C	K.FGAC@VAQGIMNAGGR.N	RPN2	4.729	762.855	-0.85	Subunit of the 26S proteasome, substrate of the N-acetyltransferase Nat1p
YIL075C	R.C@GTAFALGIAC@AGK.G	RPN2	4.554	698.837	-2.48	Subunit of the 26S proteasome, substrate of the N-acetyltransferase Nat1p
YIL078W	K.NSSC@YFLGDATNDSLQR.V	THS1	5.211	974.428	-0.3	Threonyl-tRNA synthetase, essential cytoplasmic protein
YIL078W	K.VPDGGATTVYR.C	THS1	3.446	568.291	-0.14	Threonyl-tRNA synthetase, essential cytoplasmic protein
YIL116W	K.IYNLEPYR.C	HIS5	3.077	534.28	0.08	Histidinol-phosphate aminotransferase, catalyzes the seventh step in histidine biosynthesis; responsive to general control of amino acid biosynthesis; mutations cause histidine auxotrophy and sensitivity to Cu, Co, and Ni salts
YIL116W	R.C@ARDDFTEGILLDANENAHGPTPVELSK.T	HIS5	6.685	1023.82	0.09	Histidinol-phosphate aminotransferase, catalyzes the seventh step in histidine biosynthesis; responsive to general control of amino acid biosynthesis; mutations cause histidine auxotrophy and sensitivity to Cu, Co, and Ni salts
YIL125W	R.YC@GRNPSGAVAAGSK.S	KGD1	3.823	747.86	1.08	Component of the mitochondrial alpha-ketoglutarate dehydrogenase complex, which catalyzes a key step in the tricarboxylic acid (TCA) cycle, the oxidative decarboxylation of alpha-ketoglutarate to form succinyl-CoA
YIL148W	K.C@GHTNQLRPK.K	RPL40A	2.105	605.81	0.9	Fusion protein, identical to Rpl40Bp, that is cleaved to yield ubiquitin and a ribosomal protein of the large (60S) ribosomal subunit with similarity to rat L40; ubiquitin may facilitate assembly of the ribosomal protein into ribosomes
YIL148W	K.YNC@DKSVC@R.K	RPL40A	2.612	601.258	0	Fusion protein, identical to Rpl40Bp, that is cleaved to yield ubiquitin and a ribosomal protein of the large (60S) ribosomal subunit with similarity to rat L40; ubiquitin may facilitate assembly of the ribosomal protein into ribosomes
YIR034C	R.C]GSGAIDLLHK.V	LYS1	2.463	390.869	0.16	Saccharopine dehydrogenase (NAD+, L-lysine-forming), catalyzes the conversion of saccharopine to L-lysine, which is the final step in the lysine biosynthesis pathway
YJL008C	R.L]CRVC@GATPLPR.L	CCT8	3.229	467.248	0.79	Subunit of the cytosolic chaperonin Cct ring complex, related to Tcp1p, required for the assembly of actin and tubulins in vivo
YJL052W	K.KIVSNASC@TTNC@LAPLAK.V	TDH1	6.389	974.502	-0.71	Glyceraldehyde-3-phosphate dehydrogenase, isozyme 1, involved in glycolysis and gluconeogenesis; tetramer that catalyzes the reaction of glyceraldehyde-3-phosphate to 1,3 bis-phosphoglycerate; detected in the cytoplasm and cell-wall
YJL060W	R.FAVC@KDDAYLENAVER.L	BNA3	3.762	633.968	0.07	Kynurenine aminotransferase, catalyzes formation of kynurenic acid from kynurenine; potential Cdc28p substrate
YJL080C	K.F]ACQIDIPNEENNNASK.D	SCP160	4.298	982.443	-0.9	Essential RNA-binding G protein effector of mating response pathway, mainly associated with nuclear envelope and ER, interacts in mRNA-dependent manner with translating ribosomes via multiple KH domains, similar to vertebrate vigilins
YJL080C	K.FAC@QIDIPNEENNNASKDK.T	SCP160	3.35	736.339	-0.18	Essential RNA-binding G protein effector of mating response pathway, mainly associated with nuclear envelope and ER, interacts in mRNA-dependent manner with translating ribosomes via multiple KH domains, similar to vertebrate vigilins
YJL080C	K.KLTKPINAVIEVPSK.C	SCP160	2.884	546.338	-0.25	Essential RNA-binding G protein effector of mating response pathway, mainly associated with nuclear envelope and ER, interacts in mRNA-dependent manner with translating ribosomes via multiple KH domains, similar to vertebrate vigilins
YJL080C	K.LTKPINAVIEVPSK.C	SCP160	3.429	754.956	-0.48	Essential RNA-binding G protein effector of mating response pathway, mainly associated with nuclear envelope and ER, interacts in mRNA-dependent manner with translating ribosomes via multiple KH domains, similar to vertebrate vigilins
YJL080C	K.V]CGSTEGENAEK.T	SCP160	1.163	640.775	0.09	Essential RNA-binding G protein effector of mating response pathway, mainly associated with nuclear envelope and ER, interacts in mRNA-dependent manner with translating ribosomes via multiple KH domains, similar to vertebrate vigilins
YJL080C	K.VC@GSTEGENAEK.T	SCP160	1.5	640.775	0.52	Essential RNA-binding G protein effector of mating response pathway, mainly associated with nuclear envelope and ER, interacts in mRNA-dependent manner with translating ribosomes via multiple KH domains, similar to vertebrate vigilins
YJL104W	K.G]EYGGITLDE#SCKILNIEESKGDLNMDK[.I	PAM16	2.99	1081.51	1.6	Constituent of the mitochondrial import motor associated with the presequence translocase, along with Ssc1p, Tim44p, Mge1p, and Pam18p; forms a 1:1 subcomplex with Pam18p and inhibits its cochaperone activity; contains J-like domain
YJL121C	K.C@GADQFTFHYEATQDPLHLVK.L	RPE1	4.327	826.389	-1.57	D-ribulose-5-phosphate 3-epimerase, catalyzes a reaction in the non-oxidative part of the pentose-phosphate pathway; mutants are sensitive to oxidative stress
YJL121C	K.WVDDFAK.C	RPE1	2.494	440.714	0.54	D-ribulose-5-phosphate 3-epimerase, catalyzes a reaction in the non-oxidative part of the pentose-phosphate pathway; mutants are sensitive to oxidative stress
YJL130C	K.C]IVNPSPASITASAELQSTSAK.R	URA2	4.513	1116.56	0.62	Bifunctional carbamoylphosphate synthetase (CPSase)-aspartate transcarbamylase (ATCase), catalyzes the first two enzymatic steps in the de novo biosynthesis of pyrimidines; both activities are subject to feedback inhibition by UTP
YJL130C	K.STC@AC@FEPSLDYC@VVK.M	URA2	4.892	968.417	-1.14	Bifunctional carbamoylphosphate synthetase (CPSase)-aspartate transcarbamylase (ATCase), catalyzes the first two enzymatic steps in the de novo biosynthesis of pyrimidines; both activities are subject to feedback inhibition by UTP
YJL130C	R.LAVDYSVPLVTNVK.C	URA2	3.617	759.432	-0.85	Bifunctional carbamoylphosphate synthetase (CPSase)-aspartate transcarbamylase (ATCase), catalyzes the first two enzymatic steps in the de novo biosynthesis of pyrimidines; both activities are subject to feedback inhibition by UTP
YJL130C	R.RLAVDYSVPLVTNVK.C	URA2	4.029	837.483	0.27	Bifunctional carbamoylphosphate synthetase (CPSase)-aspartate transcarbamylase (ATCase), catalyzes the first two enzymatic steps in the de novo biosynthesis of pyrimidines; both activities are subject to feedback inhibition by UTP
YJL167W	K.EACD#WYAHSLNYNTPGGK.L	ERG20	4.85	1041.95	-1.02	Farnesyl pyrophosphate synthetase, has both dimethylallyltranstransferase and geranyltranstransferase activities; catalyzes the formation of C15 farnesyl pyrophosphate units for isoprenoid and sterol biosynthesis
YJL167W	K.IGTDIQDNK.C	ERG20	2.886	502.256	0.17	Farnesyl pyrophosphate synthetase, has both dimethylallyltranstransferase and geranyltranstransferase activities; catalyzes the formation of C15 farnesyl pyrophosphate units for isoprenoid and sterol biosynthesis
YJL167W	K.IGTDIQDNKC@SWVINK.A	ERG20	5.331	945.971	-1.77	Farnesyl pyrophosphate synthetase, has both dimethylallyltranstransferase and geranyltranstransferase activities; catalyzes the formation of C15 farnesyl pyrophosphate units for isoprenoid and sterol biosynthesis
YJL167W	K.TLDENYGKKDSVAEAK.C	ERG20	4.252	884.443	1.19	Farnesyl pyrophosphate synthetase, has both dimethylallyltranstransferase and geranyltranstransferase activities; catalyzes the formation of C15 farnesyl pyrophosphate units for isoprenoid and sterol biosynthesis
YJL172W	K.TILGAPFC@PR.R	CPS1	2.418	566.303	0.38	Vacuolar carboxypeptidase yscS; expression is induced under low-nitrogen conditions
YJL190C	K.C]GVISPR.F	RPS22A	2.745	394.708	-0.42	Protein component of the small (40S) ribosomal subunit; nearly identical to Rps22Bp and has similarity to E. coli S8 and rat S15a ribosomal proteins
YJR007W	K.YGGVC@NITMPPK.A	SUI2	2.99	676.82	-0.22	Alpha subunit of the translation initiation factor eIF2, involved in the identification of the start codon; phosphorylation of Ser51 is required for regulation of translation by inhibiting the exchange of GDP for GTP
YJR016C	K.EKLAEC@DNIGEYIKK.T	ILV3	3.15	603.973	0.09	Dihydroxyacid dehydratase, catalyzes third step in the common pathway leading to biosynthesis of branched-chain amino acids
YJR016C	K.LAEC@DNIGEYIKK.T	ILV3	2.247	518.261	-0.23	Dihydroxyacid dehydratase, catalyzes third step in the common pathway leading to biosynthesis of branched-chain amino acids
YJR016C	K.LVSNASNGC@VLDA.-	ILV3	3.653	660.317	0.32	Dihydroxyacid dehydratase, catalyzes third step in the common pathway leading to biosynthesis of branched-chain amino acids
YJR063W	K.C]PQC@GNEEMNYHTLQLR.S	RPA12	3.817	717.312	-0.05	RNA polymerase I subunit A12.2; contains two zinc binding domains, and the N terminal domain is responsible for anchoring to the RNA pol I complex
YJR064W	K.DFSHPQMPK.C	CCT5	2.589	543.755	-0.19	Subunit of the cytosolic chaperonin Cct ring complex, related to Tcp1p, required for the assembly of actin and tubulins in vivo
YJR070C	R.ETC@ELAINR.I	LIA1	2.846	553.269	-0.71	Deoxyhypusine hydroxylase, a HEAT-repeat containing metalloenzyme that catalyses hypusine formation; binds to and is required for the modification of Hyp2p (eIF5A); complements S. pombe mmd1 mutants defective in mitochondrial positioning
YJR077C	K.FALAGAIGC@GSTHSSMVPIDVVK.T	MIR1	4.203	778.393	0.29	Mitochondrial phosphate carrier, imports inorganic phosphate into mitochondria; functionally redundant with Pic2p but more abundant than Pic2p under normal conditions; phosphorylated
YJR091C	K.LLC@ETNYGPTFVHK.V	JSN1	3.206	839.916	-0.14	Member of the Puf family of RNA-binding proteins, interacts with mRNAs encoding membrane-associated proteins; overexpression suppresses a tub2-150 mutation and causes increased sensitivity to benomyl in wild-type cells
YJR094W-A	R.GAAGIWTC@SC@C@K.K	RPL43B	4.024	685.786	0.47	Protein component of the large (60S) ribosomal subunit, identical to Rpl43Ap and has similarity to rat L37a ribosomal protein
YJR094W-A	R.GAAGIWTC@SC@C@KK.T	RPL43B	3.907	749.833	-0.29	Protein component of the large (60S) ribosomal subunit, identical to Rpl43Ap and has similarity to rat L37a ribosomal protein
YJR094W-A	R.YDC@SFC@GK.K	RPL43B	2.194	518.697	0.41	Protein component of the large (60S) ribosomal subunit, identical to Rpl43Ap and has similarity to rat L37a ribosomal protein
YJR094W-A	R.YDC@SFCGK#K.T	RPL43B	2.896	582.744	-1.04	Protein component of the large (60S) ribosomal subunit, identical to Rpl43Ap and has similarity to rat L37a ribosomal protein
YJR104C	K.TGNAGPRPAC@GVIGLTN.-	SOD1	3.96	827.92	-0.02	Cytosolic superoxide dismutase; some mutations are analogous to those that cause ALS (amyotrophic lateral sclerosis) in humans
YJR104C	R.GFHIHEFGDATNGC@VSAGPHFNPFKK.T	SOD1	5.941	957.787	1.49	Cytosolic superoxide dismutase; some mutations are analogous to those that cause ALS (amyotrophic lateral sclerosis) in humans
YJR105W	K.C]AALITGHNR.S	ADO1	3.285	556.785	-0.32	Adenosine kinase, required for the utilization of S-adenosylmethionine (AdoMet); may be involved in recycling adenosine produced through the methyl cycle
YJR105W	K.SMYQVQNDIGTGK.C	ADO1	4.474	728.84	-0.49	Adenosine kinase, required for the utilization of S-adenosylmethionine (AdoMet); may be involved in recycling adenosine produced through the methyl cycle
YJR105W	R.VLPYATVIIANESEAEAFCD#AFQLDC@ANTDLEAIAQR.I	ADO1	2.907	1032.99	-2.64	Adenosine kinase, required for the utilization of S-adenosylmethionine (AdoMet); may be involved in recycling adenosine produced through the methyl cycle
YJR123W	K.AQC@PIIER.L	RPS5	2.452	493.758	-0.2	Protein component of the small (40S) ribosomal subunit, the least basic of the non-acidic ribosomal proteins; phosphorylated in vivo; essential for viability; has similarity to E. coli S7 and rat S5 ribosomal proteins
YJR148W	K.KLGANYAPC@VLPQLQAASR.G	BAT2	3.143	1029.05	0.73	Cytosolic branched-chain amino acid aminotransferase, homolog of murine ECA39; highly expressed during stationary phase and repressed during logarithmic phase
YJR148W	K.LGANYAPC@VLPQLQAASR.G	BAT2	4.086	965.004	0.01	Cytosolic branched-chain amino acid aminotransferase, homolog of murine ECA39; highly expressed during stationary phase and repressed during logarithmic phase
YJR148W	R.IC@LPTFDPEELITLIGK.L	BAT2	1.901	980.029	-0.08	Cytosolic branched-chain amino acid aminotransferase, homolog of murine ECA39; highly expressed during stationary phase and repressed during logarithmic phase
YKL006W	K.WAAAAVC@EK.W	RPL14A	3.825	503.245	0.12	N-terminally acetylated protein component of the large (60S) ribosomal subunit, nearly identical to Rpl14Bp and has similarity to rat L14 ribosomal protein; rpl14a csh5 double null mutant exhibits synthetic slow growth
YKL029C	R.DFDEC@LQWVK.A	MAE1	3.508	670.303	-0.44	Mitochondrial malic enzyme, catalyzes the oxidative decarboxylation of malate to pyruvate, which is a key intermediate in sugar metabolism and a precursor for synthesis of several amino acids
YKL029C	R.VLPVC@LDVGTNNKK.L	MAE1	2.616	778.926	-0.65	Mitochondrial malic enzyme, catalyzes the oxidative decarboxylation of malate to pyruvate, which is a key intermediate in sugar metabolism and a precursor for synthesis of several amino acids
YKL033W-A	K.NIPIALC@TSSNK.T	YKL033W-A	2.307	659.345	-0.22	Putative protein of unknown function; similar to uncharacterized proteins from other fungi
YKL035W	K.LNGGLGTSMGC@VGPK.S	UGP1	4.514	732.353	-0.21	UDP-glucose pyrophosphorylase (UGPase), catalyses the reversible formation of UDP-Glc from glucose 1-phosphate and UTP, involved in a wide variety of metabolic pathways, expression modulated by Pho85p through Pho4p
YKL035W	R.DGHEINVLQLETAC@GAAIR.H	UGP1	5.51	1034.02	0.03	UDP-glucose pyrophosphorylase (UGPase), catalyses the reversible formation of UDP-Glc from glucose 1-phosphate and UTP, involved in a wide variety of metabolic pathways, expression modulated by Pho85p through Pho4p
YKL040C	R.LQGAC@TSC@SSSEVTLK.Y	NFU1	4.689	864.401	-0.01	Protein involved in iron metabolism in mitochondria; similar to NifU, which is a protein required for the maturation of the Fe/S clusters of nitrogenase in nitrogen-fixing bacteria
YKL040C	R.LQGAC@TSCSSSE#VTLK.Y	NFU1	4.23	864.4	-0.57	Protein involved in iron metabolism in mitochondria; similar to NifU, which is a protein required for the maturation of the Fe/S clusters of nitrogenase in nitrogen-fixing bacteria
YKL060C	K.EHGEPLFSSHMLDLSEETDEENISTC@VK.Y	FBA1	4.33	1083.81	0.36	Fructose 1,6-bisphosphate aldolase, required for glycolysis and gluconeogenesis; catalyzes conversion of fructose 1,6 bisphosphate to glyceraldehyde-3-P and dihydroxyacetone-P; locates to mitochondrial outer surface upon oxidative stress
YKL060C	K.VNLDTDC@QYAYLTGIR.D	FBA1	5.474	951.456	-0.69	Fructose 1,6-bisphosphate aldolase, required for glycolysis and gluconeogenesis; catalyzes conversion of fructose 1,6 bisphosphate to glyceraldehyde-3-P and dihydroxyacetone-P; locates to mitochondrial outer surface upon oxidative stress
YKL060C	R.E#QVGCKEEKPLFLVFHGGSGSTVQEFHTGIDNGVVK.V	FBA1	4.58	1310.65	0.33	Fructose 1,6-bisphosphate aldolase, required for glycolysis and gluconeogenesis; catalyzes conversion of fructose 1,6 bisphosphate to glyceraldehyde-3-P and dihydroxyacetone-P; locates to mitochondrial outer surface upon oxidative stress
YKL060C	R.EQVGC@KEEKPLFLVFHGGSGSTVQEFHTGIDNGVVK.V	FBA1	4.213	983.242	-0.27	Fructose 1,6-bisphosphate aldolase, required for glycolysis and gluconeogenesis; catalyzes conversion of fructose 1,6 bisphosphate to glyceraldehyde-3-P and dihydroxyacetone-P; locates to mitochondrial outer surface upon oxidative stress
YKL060C	R.SIAPAYGIPVVLHSDHCAK#K.L	FBA1	3.765	1082.07	-0.8	Fructose 1,6-bisphosphate aldolase, required for glycolysis and gluconeogenesis; catalyzes conversion of fructose 1,6 bisphosphate to glyceraldehyde-3-P and dihydroxyacetone-P; locates to mitochondrial outer surface upon oxidative stress
YKL067W	R.NVC@HGSDSVDSAER.E	YNK1	3.876	511.551	0.18	Nucleoside diphosphate kinase, catalyzes the transfer of gamma phosphates from nucleoside triphosphates, usually ATP, to nucleoside diphosphates by a mechanism that involves formation of an autophosphorylated enzyme intermediate
YKL077W	R.SEPFC@TPYENSR.W	YKL077W	1.998	743.817	-0.47	Putative protein of unknown function; green fluorescent protein (GFP)-fusion protein localizes to the vacuole
YKL081W	K.DVDAC@FVK.I	TEF4	2.316	477.224	0.06	Translation elongation factor EF-1 gamma
YKL085W	K.IHPIGELSSEEEEMLQK.C	MDH1	5.335	656.992	1.87	Mitochondrial malate dehydrogenase, catalyzes interconversion of malate and oxaloacetate; involved in the tricarboxylic acid (TCA) cycle; phosphorylated
YKL103C	K.SALVDSTPLPVC@R.I	LAP4	3.816	707.872	0.4	Vacuolar aminopeptidase, often used as a marker protein in studies of autophagy and cytosol to vacuole targeting (CVT) pathway
YKL170W	R.IMANDGCVD#R.T	MRPL38	3.784	575.752	-0.74	Mitochondrial ribosomal protein of the large subunit; appears as two protein spots (YmL34 and YmL38) on two-dimensional SDS gels
YKL175W	R.NVPHGCEGSEDNGQSD#DKDHR.G	ZRT3	1.431	784.988	-0.09	Vacuolar membrane zinc transporter, transports zinc from storage in the vacuole to the cytoplasm when needed; transcription is induced under conditions of zinc deficiency
YKL176C	R.ILIIEEAGQM@ACRNNY#RDIFDYTTSK[.I	LST4	3.534	1075.85	-0.32	Protein possibly involved in a post-Golgi secretory pathway; required for the transport of nitrogen-regulated amino acid permease Gap1p from the Golgi to the cell surface
YKL181W	K.IFVGNSHPELGNMVC@QR.L	PRS1	3.017	653.316	-1.75	5-phospho-ribosyl-1(alpha)-pyrophosphate synthetase, synthesizes PRPP, which is required for nucleotide, histidine, and tryptophan biosynthesis; one of five related enzymes, which are active as heteromultimeric complexes
YKL181W	R.LGIEPAPC@TLKK.F	PRS1	2.989	663.876	-0.05	5-phospho-ribosyl-1(alpha)-pyrophosphate synthetase, synthesizes PRPP, which is required for nucleotide, histidine, and tryptophan biosynthesis; one of five related enzymes, which are active as heteromultimeric complexes
YKL182W	K.EVYDFTHAVGNNC@EDFVSRPDR.T	FAS1	3.133	876.391	-0.22	Beta subunit of fatty acid synthetase, which catalyzes the synthesis of long-chain saturated fatty acids; contains acetyltransacylase, dehydratase, enoyl reductase, malonyl transacylase, and palmitoyl transacylase activities
YKL182W	K.NANIFSSVK.C	FAS1	3.168	490.264	-0.34	Beta subunit of fatty acid synthetase, which catalyzes the synthesis of long-chain saturated fatty acids; contains acetyltransacylase, dehydratase, enoyl reductase, malonyl transacylase, and palmitoyl transacylase activities
YKL182W	R.TC@ILHGPVAAQFTK.V	FAS1	4.793	771.908	-0.3	Beta subunit of fatty acid synthetase, which catalyzes the synthesis of long-chain saturated fatty acids; contains acetyltransacylase, dehydratase, enoyl reductase, malonyl transacylase, and palmitoyl transacylase activities
YKL210W	K.GVLESISDSLSSKPHNFEDC@IK.W	UBA1	3.379	821.401	0.19	Ubiquitin activating enzyme (E1), involved in ubiquitin-mediated protein degradation and essential for viability
YKL210W	K.INEFCH#SSGIR.F	UBA1	3.659	660.312	0.02	Ubiquitin activating enzyme (E1), involved in ubiquitin-mediated protein degradation and essential for viability
YKL211C	K.TSPISHD#NCGIFK.N	TRP3	2.947	738.351	-0.16	Bifunctional enzyme exhibiting both indole-3-glycerol-phosphate synthase and anthranilate synthase activities, forms multifunctional hetero-oligomeric anthranilate synthase:indole-3-glycerol phosphate synthase enzyme complex with Trp2p
YKL211C	R.YHSLAGTESSLPSC@LK.V	TRP3	4.776	875.427	-0.7	Bifunctional enzyme exhibiting both indole-3-glycerol-phosphate synthase and anthranilate synthase activities, forms multifunctional hetero-oligomeric anthranilate synthase:indole-3-glycerol phosphate synthase enzyme complex with Trp2p
YKL216W	K.FLNNTYENPFMNASGVHC@MTTQELDELANSK.A	URA1	5.084	1197.87	-0.47	Dihydroorotate dehydrogenase, catalyzes the fourth enzymatic step in the de novo biosynthesis of pyrimidines, converting dihydroorotic acid into orotic acid
YKR001C	K.AHYC@GTPYLAK.K	VPS1	3.107	640.809	0.45	Dynamin-like GTPase required for vacuolar sorting; also involved in actin cytoskeleton organization, late Golgi-retention of some proteins, regulating peroxisome biogenesis
YKR043C	R.DGCE#NGETTQQIGLR.L	YKR043C	5.083	839.378	-0.04	Putative protein of unknown function; green fluorescent protein (GFP)-fusion protein localizes to the cytoplasm and nucleus
YKR080W	K.C]SLDSDVVITGVPSENYK.F	MTD1	3.903	991.972	-0.45	NAD-dependent 5,10-methylenetetrahydrafolate dehydrogenase, plays a catalytic role in oxidation of cytoplasmic one-carbon units; expression is regulated by Bas1p and Bas2p, repressed by adenine, and may be induced by inositol and choline
YLL026W	K.SNPC@LIGEPGIGK.T	HSP104	3.586	671.345	0.07	Heat shock protein that cooperates with Ydj1p (Hsp40) and Ssa1p (Hsp70) to refold and reactivate previously denatured, aggregated proteins; responsive to stresses including: heat, ethanol, and sodium arsenite; involved in [PSI+] propagation
YLL026W	R.VDC@SELSEK.Y	HSP104	2.857	533.74	-0.21	Heat shock protein that cooperates with Ydj1p (Hsp40) and Ssa1p (Hsp70) to refold and reactivate previously denatured, aggregated proteins; responsive to stresses including: heat, ethanol, and sodium arsenite; involved in [PSI+] propagation
YLR022C	K.GLVANKEDLQK.C	SDO1	2.991	607.841	0.19	Essential protein involved in 60S ribosome maturation; ortholog of the human protein (SBDS) responsible for autosomal recessive Shwachman-Bodian-Diamond Syndrome; highly conserved across archae and eukaryotes
YLR027C	K.LSTVSPVFVC@QSFAK.N	AAT2	2.906	835.435	0.52	Cytosolic aspartate aminotransferase, involved in nitrogen metabolism; localizes to peroxisomes in oleate-grown cells
YLR027C	R.VGC@FHLALTK.Q	AAT2	3.696	573.311	0.69	Cytosolic aspartate aminotransferase, involved in nitrogen metabolism; localizes to peroxisomes in oleate-grown cells
YLR028C	K.YC@ILQIDPNYVPGQMESR.E	ADE16	4.505	1100.02	2.36	Enzyme of 'de novo' purine biosynthesis containing both 5-aminoimidazole-4-carboxamide ribonucleotide transformylase and inosine monophosphate cyclohydrolase activities, isozyme of Ade17p; ade16 ade17 mutants require adenine and histidine
YLR044C	K.NPVILADAC@C@SR.H	PDC1	5.195	688.327	0.36	Major of three pyruvate decarboxylase isozymes, key enzyme in alcoholic fermentation, decarboxylates pyruvate to acetaldehyde; subject to glucose-, ethanol-, and autoregulation; involved in amino acid catabolism
YLR044C	R.MSANISETTAMITDIATAPAEIDR.C	PDC1	2.276	852.072	-0.22	Major of three pyruvate decarboxylase isozymes, key enzyme in alcoholic fermentation, decarboxylates pyruvate to acetaldehyde; subject to glucose-, ethanol-, and autoregulation; involved in amino acid catabolism
YLR058C	K.GVDGARVEYIC@EK.I	SHM2	3.915	748.364	-0.3	Cytosolic serine hydroxymethyltransferase, converts serine to glycine plus 5,10 methylenetetrahydrofolate; major isoform involved in generating precursors for purine, pyrimidine, amino acid, and lipid biosynthesis
YLR058C	K.VLVAGTSAYC@R.L	SHM2	3.891	598.808	0.03	Cytosolic serine hydroxymethyltransferase, converts serine to glycine plus 5,10 methylenetetrahydrofolate; major isoform involved in generating precursors for purine, pyrimidine, amino acid, and lipid biosynthesis
YLR058C	R.MEILC@QQR.A	SHM2	2.953	539.263	0.55	Cytosolic serine hydroxymethyltransferase, converts serine to glycine plus 5,10 methylenetetrahydrofolate; major isoform involved in generating precursors for purine, pyrimidine, amino acid, and lipid biosynthesis
YLR058C	R.VEYIC@EK.I	SHM2	1.948	470.726	0.47	Cytosolic serine hydroxymethyltransferase, converts serine to glycine plus 5,10 methylenetetrahydrofolate; major isoform involved in generating precursors for purine, pyrimidine, amino acid, and lipid biosynthesis
YLR058C	R.YYGGNEHIDRMEILC@QQR.A	SHM2	2.436	766.685	0.15	Cytosolic serine hydroxymethyltransferase, converts serine to glycine plus 5,10 methylenetetrahydrofolate; major isoform involved in generating precursors for purine, pyrimidine, amino acid, and lipid biosynthesis
YLR060W	K.LHANLC@R.N	FRS1	2.291	442.232	-0.34	Beta subunit of cytoplasmic phenylalanyl-tRNA synthetase, forms a tetramer with Frs2p to generate active enzyme; sequence is evolutionarily distant from mitochondrial phenylalanyl-tRNA synthetase (Msf1p), but substrate binding is similar
YLR060W	R.YC@DEPFTVEPVEIVSEHNGQSR.L	FRS1	4.002	864.727	-0.46	Beta subunit of cytoplasmic phenylalanyl-tRNA synthetase, forms a tetramer with Frs2p to generate active enzyme; sequence is evolutionarily distant from mitochondrial phenylalanyl-tRNA synthetase (Msf1p), but substrate binding is similar
YLR075W	K.MLSC@AGADR.L	RPL10	3.258	490.718	0.08	Protein component of the large (60S) ribosomal subunit, responsible for joining the 40S and 60S subunits; regulates translation initiation; has similarity to rat L10 ribosomal protein and to members of the QM gene family
YLR075W	K.MLSC@AGADRLQQGMR.G	RPL10	2.147	570.601	-0.61	Protein component of the large (60S) ribosomal subunit, responsible for joining the 40S and 60S subunits; regulates translation initiation; has similarity to rat L10 ribosomal protein and to members of the QM gene family
YLR089C	K.LLESTGIC@TVPGSGFGQEPGTYHLR.T	ALT1	4.66	892.774	-0.31	Putative alanine transaminase (glutamic pyruvic transaminase); the authentic, non-tagged protein is detected in highly purified mitochondria in high-throughput studies
YLR109W	K.FASDPGC@AFTK.S	AHP1	3.498	600.772	0.3	Thiol-specific peroxiredoxin, reduces hydroperoxides to protect against oxidative damage; function in vivo requires covalent conjugation to Urm1p
YLR109W	K.FQYIAISQSDADSESC@K.M	AHP1	5.529	974.933	-0.26	Thiol-specific peroxiredoxin, reduces hydroperoxides to protect against oxidative damage; function in vivo requires covalent conjugation to Urm1p
YLR109W	K.FQYIAISQSDADSESC@KMPQTVEWSK.L	AHP1	4.119	1017.79	-0.29	Thiol-specific peroxiredoxin, reduces hydroperoxides to protect against oxidative damage; function in vivo requires covalent conjugation to Urm1p
YLR126C	R.QC@QELDNNGIQAAR.N	YLR126C	4.572	808.876	-0.11	Putative protein of unknown function with similarity to glutamine amidotransferase proteins; has Aft1p-binding motif in the promoter; may be involved in copper and iron homeostasis; YLR126C is not an essential protein
YLR153C	K.LNASYNC@VDR.H	ACS2	3.414	606.277	0.11	Acetyl-coA synthetase isoform which, along with Acs1p, is the nuclear source of acetyl-coA for histone acetylation; mutants affect global transcription; required for growth on glucose; expressed under anaerobic conditions
YLR153C	K.VVITC@DEGK.R	ACS2	2.308	510.755	-0.5	Acetyl-coA synthetase isoform which, along with Acs1p, is the nuclear source of acetyl-coA for histone acetylation; mutants affect global transcription; required for growth on glucose; expressed under anaerobic conditions
YLR153C	K.VVITCD#EGKR.G	ACS2	2.419	588.806	1.02	Acetyl-coA synthetase isoform which, along with Acs1p, is the nuclear source of acetyl-coA for histone acetylation; mutants affect global transcription; required for growth on glucose; expressed under anaerobic conditions
YLR167W	K.L]RRE#CSNPTCGAGVFLANHK.D	RPS31	2.659	572.535	0.24	Fusion protein that is cleaved to yield a ribosomal protein of the small (40S) subunit and ubiquitin; ubiquitin may facilitate assembly of the ribosomal protein into ribosomes; interacts genetically with translation factor eIF2B
YLR167W	R.LYCGK#C@HSVYK.V	RPS31	3.401	707.834	-0.55	Fusion protein that is cleaved to yield a ribosomal protein of the small (40S) subunit and ubiquitin; ubiquitin may facilitate assembly of the ribosomal protein into ribosomes; interacts genetically with translation factor eIF2B
YLR167W	R.R]ECSNPTC@GAGVFLANHK.D	RPS31	5.783	673.316	0.21	Fusion protein that is cleaved to yield a ribosomal protein of the small (40S) subunit and ubiquitin; ubiquitin may facilitate assembly of the ribosomal protein into ribosomes; interacts genetically with translation factor eIF2B
YLR175W	K.DSAVNAVC@YGAK.L	CBF5	4.241	627.792	-1.42	Pseudouridine synthase catalytic subunit of box H/ACA small nucleolar ribonucleoprotein particles (snoRNPs), acts on both large and small rRNAs and on snRNA U2
YLR175W	K.EYVC@IVR.L	CBF5	1.825	469.742	-0.26	Pseudouridine synthase catalytic subunit of box H/ACA small nucleolar ribonucleoprotein particles (snoRNPs), acts on both large and small rRNAs and on snRNA U2
YLR185W	K.KTC@SSC@GYPAAK.T	RPL37A	3.532	665.299	-1.9	Protein component of the large (60S) ribosomal subunit, has similarity to Rpl37Bp and to rat L37 ribosomal protein
YLR185W	K.TC@SSC@GYPAAK.T	RPL37A	3.189	601.253	0.18	Protein component of the large (60S) ribosomal subunit, has similarity to Rpl37Bp and to rat L37 ribosomal protein
YLR216C	K.LC@EGNAGMAK.T	CPR6	2.532	525.739	-0.01	Peptidyl-prolyl cis-trans isomerase (cyclophilin), catalyzes the cis-trans isomerization of peptide bonds N-terminal to proline residues; binds to Hsp82p and contributes to chaperone activity
YLR229C	K.YVEC@SALTQR.G	CDC42	3.141	613.795	-0.53	Small rho-like GTPase, essential for establishment and maintenance of cell polarity; mutants have defects in the organization of actin and septins
YLR244C	K.IYC@SGLQC@GR.E	MAP1	3.674	607.276	-0.07	Methionine aminopeptidase, catalyzes the cotranslational removal of N-terminal methionine from nascent polypeptides; function is partially redundant with that of Map2p
YLR244C	R.TY#CGHGVGEFFHC@SPNIPHYAK.N	MAP1	4.446	860.051	-0.19	Methionine aminopeptidase, catalyzes the cotranslational removal of N-terminal methionine from nascent polypeptides; function is partially redundant with that of Map2p
YLR244C	R.TYC@GHGVGEFFHC@SPNIPHYAK.N	MAP1	5.35	860.051	0.21	Methionine aminopeptidase, catalyzes the cotranslational removal of N-terminal methionine from nascent polypeptides; function is partially redundant with that of Map2p
YLR249W	K.EIEEH#CSMLGLDPEIVSHSR.I	YEF3	2.773	589.275	0.69	Translational elongation factor 3, stimulates the binding of aminoacyl-tRNA (AA-tRNA) to ribosomes by releasing EF-1 alpha from the ribosomal complex; contains two ABC cassettes; binds and hydrolyses ATP
YLR249W	K.GNFTEFVKK.C	YEF3	2.891	535.287	-0.07	Translational elongation factor 3, stimulates the binding of aminoacyl-tRNA (AA-tRNA) to ribosomes by releasing EF-1 alpha from the ribosomal complex; contains two ABC cassettes; binds and hydrolyses ATP
YLR249W	K.SAVIIDNMC@K.L	YEF3	2.818	583.781	0.19	Translational elongation factor 3, stimulates the binding of aminoacyl-tRNA (AA-tRNA) to ribosomes by releasing EF-1 alpha from the ribosomal complex; contains two ABC cassettes; binds and hydrolyses ATP
YLR249W	K.STLINVLTGELLPTSGEVY#THENCR.I	YEF3	2.837	935.136	0.08	Translational elongation factor 3, stimulates the binding of aminoacyl-tRNA (AA-tRNA) to ribosomes by releasing EF-1 alpha from the ribosomal complex; contains two ABC cassettes; binds and hydrolyses ATP
YLR249W	K.VTNMEFQYPGTSKPQITDINFQC@SLSSR.I	YEF3	4.136	1088.85	-0.67	Translational elongation factor 3, stimulates the binding of aminoacyl-tRNA (AA-tRNA) to ribosomes by releasing EF-1 alpha from the ribosomal complex; contains two ABC cassettes; binds and hydrolyses ATP
YLR249W	K.YKGNFTEFVKK.C	YEF3	3.292	680.866	-0.19	Translational elongation factor 3, stimulates the binding of aminoacyl-tRNA (AA-tRNA) to ribosomes by releasing EF-1 alpha from the ribosomal complex; contains two ABC cassettes; binds and hydrolyses ATP
YLR249W	R.AIANGQVDGFPTQEEC@R.T	YEF3	5.013	946.433	-0.41	Translational elongation factor 3, stimulates the binding of aminoacyl-tRNA (AA-tRNA) to ribosomes by releasing EF-1 alpha from the ribosomal complex; contains two ABC cassettes; binds and hydrolyses ATP
YLR249W	R.KEIEEHC@SMLGLDPEIVSHSR.I	YEF3	5.843	822.73	-0.31	Translational elongation factor 3, stimulates the binding of aminoacyl-tRNA (AA-tRNA) to ribosomes by releasing EF-1 alpha from the ribosomal complex; contains two ABC cassettes; binds and hydrolyses ATP
YLR249W	R.KSAVIIDNMC@K.L	YEF3	2.502	639.83	-0.6	Translational elongation factor 3, stimulates the binding of aminoacyl-tRNA (AA-tRNA) to ribosomes by releasing EF-1 alpha from the ribosomal complex; contains two ABC cassettes; binds and hydrolyses ATP
YLR249W	R.RYGIC@GPNGC@GK.S	YEF3	4.428	669.806	-0.02	Translational elongation factor 3, stimulates the binding of aminoacyl-tRNA (AA-tRNA) to ribosomes by releasing EF-1 alpha from the ribosomal complex; contains two ABC cassettes; binds and hydrolyses ATP
YLR249W	R.YGIC@GPNGC@GK.S	YEF3	3.982	591.755	-0.07	Translational elongation factor 3, stimulates the binding of aminoacyl-tRNA (AA-tRNA) to ribosomes by releasing EF-1 alpha from the ribosomal complex; contains two ABC cassettes; binds and hydrolyses ATP
YLR259C	K.NVAAGC@NPMDLRR.G	HSP60	2.499	737.356	0.14	Tetradecameric mitochondrial chaperonin required for ATP-dependent folding of precursor polypeptides and complex assembly; prevents aggregation and mediates protein refolding after heat shock; role in mtDNA transmission; phosphorylated
YLR268W	K.STLIYREDGLPLC@TSVDNENDPSLFEQK.Q	SEC22	3.783	1080.85	1.27	R-SNARE protein; assembles into SNARE complex with Bet1p, Bos1p and Sed5p; cycles between the ER and Golgi complex; involved in anterograde and retrograde transport between the ER and Golgi; synaptobrevin homolog
YLR287C	K.IFNAC@DSLSNC@SK.A	YLR287C	4.245	758.33	-2.48	Putative protein of unknown function; green fluorescent protein (GFP)-fusion protein localizes to the cytoplasm; YLR287C is not an essential gene
YLR293C	R.V]CENIPIVLC@GNKVDVK.E	GSP1	3.674	979.016	0.16	GTP binding protein (mammalian Ranp homolog) involved in the maintenance of nuclear organization, RNA processing and transport; regulated by Prp20p, Rna1p, Yrb1p, Yrb2p, Yrp4p, Yrb30p, Cse1p and Kap95p; yeast Gsp2p homolog
YLR300W	R.KYPNQC@GTISN.-	EXG1	3.802	641.298	0.1	Major exo-1,3-beta-glucanase of the cell wall, involved in cell wall beta-glucan assembly; exists as three differentially glycosylated isoenzymes
YLR301W	K.NWDSGC@VEETGAVYPFGADK.E	YLR301W	6.054	1101.48	-0.25	Protein of unknown function that interacts with Sec72p
YLR304C	R.VGLIGSC@TNSSYEDMSR.S	ACO1	4.986	946.411	-0.28	Aconitase, required for the tricarboxylic acid (TCA) cycle and also independently required for mitochondrial genome maintenance; phosphorylated; component of the mitochondrial nucleoid; mutation leads to glutamate auxotrophy
YLR355C	K.YGMDYMYDAC@STTAR.R	ILV5	3.007	918.848	0.52	Acetohydroxyacid reductoisomerase, mitochondrial protein involved in branched-chain amino acid biosynthesis, also required for maintenance of wild-type mitochondrial DNA and found in mitochondrial nucleoids
YLR388W	K.YGLNIC@R.Q	RPS29A	2.221	448.226	0.08	Protein component of the small (40S) ribosomal subunit; nearly identical to Rps29Bp and has similarity to rat S29 and E. coli S14 ribosomal proteins
YLR388W	R.V]CSSHTGLIR.K	RPS29A	2.283	377.198	-0.24	Protein component of the small (40S) ribosomal subunit; nearly identical to Rps29Bp and has similarity to rat S29 and E. coli S14 ribosomal proteins
YLR390W-A	K.C]LDSIC@PNNDADAAYSAFK.S	CCW14	5.586	1066.46	0.36	Covalently linked cell wall glycoprotein, present in the inner layer of the cell wall
YLR420W	K.IILEHC@TSESAIK.T	URA4	4.243	750.89	-0.45	Dihydroorotase, catalyzes the third enzymatic step in the de novo biosynthesis of pyrimidines, converting carbamoyl-L-aspartate into dihydroorotate
YLR420W	R.EGAMC@ELVTPK.I	URA4	2.863	625.791	-0.29	Dihydroorotase, catalyzes the third enzymatic step in the de novo biosynthesis of pyrimidines, converting carbamoyl-L-aspartate into dihydroorotate
YLR441C	R.VVEVC@LADLQGSEDHSFR.K	RPS1A	5.68	1030.99	-3.52	Ribosomal protein 10 (rp10) of the small (40S) subunit; nearly identical to Rps1Bp and has similarity to rat S3a ribosomal protein
YLR441C	R.VVEVC@LADLQGSEDHSFRK.I	RPS1A	5.233	1095.04	0.39	Ribosomal protein 10 (rp10) of the small (40S) subunit; nearly identical to Rps1Bp and has similarity to rat S3a ribosomal protein
YML004C	K.ASNDPTLLLNHTC@LR.V	GLO1	4.28	862.941	-0.3	Monomeric glyoxalase I, catalyzes the detoxification of methylglyoxal (a by-product of glycolysis) via condensation with glutathione to produce S-D-lactoylglutathione; expression regulated by methylglyoxal levels and osmotic stress
YML008C	R.F]TGCNVIGLNNNDYQIAK.A	ERG6	4.427	1020.99	-0.71	Delta(24)-sterol C-methyltransferase, converts zymosterol to fecosterol in the ergosterol biosynthetic pathway by methylating position C-24; localized to both lipid particles and mitochondrial outer membrane
YML022W	K.AGKLPGEC@FK.A	APT1	2.905	553.786	-0.72	Adenine phosphoribosyltransferase, catalyzes the formation of AMP from adenine and 5-phosphoribosylpyrophosphate; involved in the salvage pathway of purine nucleotide biosynthesis
YML056C	K.FGFSGFPVTEDGKC@PGK.L	IMD4	3.333	915.428	-2.2	Inosine monophosphate dehydrogenase, catalyzes the first step of GMP biosynthesis, member of a four-gene family in S. cerevisiae, constitutively expressed
YML058W	R.C]QQQQAPSTLR.T	SML1	3.516	658.823	0.55	Ribonucleotide reductase inhibitor involved in regulating dNTP production; regulated by Mec1p and Rad53p during DNA damage and S phase
YML070W	R.ALGINC@R.V	DAK1	2.348	402.213	0.39	Dihydroxyacetone kinase, required for detoxification of dihydroxyacetone (DHA); involved in stress adaptation
YML072C	K.ANNDGVAVFDEEC@SFK.A	TCB3	4.344	901.389	0.73	Lipid-binding protein, localized to the bud via specific mRNA transport; non-tagged protein detected in a phosphorylated state in mitochondria; GFP-fusion protein localizes to the cell periphery; C-termini of Tcb1p, Tcb2p and Tcb3p interact
YML085C	K.I]GICYEPPTATPNSQLATVDR.A	TUB1	4.673	1152.07	1	Alpha-tubulin; associates with beta-tubulin (Tub2p) to form tubulin dimer, which polymerizes to form microtubules
YML086C	R.C@SNTTLPSEPLDTSK.R	ALO1	3.413	825.387	-1.24	D-Arabinono-1,4-lactone oxidase, catalyzes the final step in biosynthesis of D-erythroascorbic acid, which is protective against oxidative stress
YML126C	K.YFDYNVFHVPTC@K.L	ERG13	5.033	845.39	-0.51	3-hydroxy-3-methylglutaryl-CoA (HMG-CoA) synthase, catalyzes the formation of HMG-CoA from acetyl-CoA and acetoacetyl-CoA; involved in the second step in mevalonate biosynthesis
YMR008C	K.IAVAC@SGGGYR.A	PLB1	3.582	555.772	0.15	Phospholipase B (lysophospholipase) involved in lipid metabolism, required for deacylation of phosphatidylcholine and phosphatidylethanolamine but not phosphatidylinositol
YMR012W	K.LLTSESNIITPC@VR.S	CLU1	3.587	801.93	0.44	eIF3 component of unknown function; deletion causes defects in mitochondrial organization but not in growth or translation initiation, can rescue cytokinesis and mitochondrial organization defects of the Dictyostelium cluA- mutant
YMR083W	K.YSGVC@HTDLHAWHGDWPLPVK.L	ADH3	4.782	825.727	-0.48	Mitochondrial alcohol dehydrogenase isozyme III; involved in the shuttling of mitochondrial NADH to the cytosol under anaerobic conditions and ethanol production
YMR091C	R.AITEQQNFEK.C	NPL6	2.631	604.301	-0.25	Component of the RSC chromatin remodeling complex; interacts with Rsc3p, Rsc30p, Ldb7p, and Htl1p to form a module important for a broad range of RSC functions; involved in nuclear protein import and maintenance of proper telomere length
YMR092C	K.GSQYLCSGDE#SGK.V	AIP1	3.229	694.293	0.11	Actin cortical patch component, interacts with the actin depolymerizing factor cofilin; required to restrict cofilin localization to cortical patches; contains WD repeats
YMR092C	R.C]LDDGDSKVPPVVQFTGHGSSVVTTVK.F	AIP1	5.092	943.809	1.41	Actin cortical patch component, interacts with the actin depolymerizing factor cofilin; required to restrict cofilin localization to cortical patches; contains WD repeats
YMR092C	R.NFTTHLSYDPTTNAIAYPCGK[.S	AIP1	4.573	791.039	-0.23	Actin cortical patch component, interacts with the actin depolymerizing factor cofilin; required to restrict cofilin localization to cortical patches; contains WD repeats
YMR116C	K.GQC@LATLLGHNDWVSQVR.V	ASC1	2.533	685.346	0.07	G-protein beta subunit and guanine nucleotide dissociation inhibitor for Gpa2p; ortholog of RACK1 that inhibits translation; core component of the small (40S) ribosomal subunit; represses Gcn4p in the absence of amino acid starvation
YMR120C	K.VDYVVC@NLYPFK.E	ADE17	2.006	758.879	-0.14	Enzyme of 'de novo' purine biosynthesis containing both 5-aminoimidazole-4-carboxamide ribonucleotide transformylase and inosine monophosphate cyclohydrolase activities, isozyme of Ade16p; ade16 ade17 mutants require adenine and histidine
YMR120C	K.VDYVVC@NLYPFKETVAK.V	ADE17	2.581	682.352	0.2	Enzyme of 'de novo' purine biosynthesis containing both 5-aminoimidazole-4-carboxamide ribonucleotide transformylase and inosine monophosphate cyclohydrolase activities, isozyme of Ade16p; ade16 ade17 mutants require adenine and histidine
YMR120C	K.YC@ILQIDPNYVPEAVERR.Q	ADE17	1.695	745.712	-0.52	Enzyme of 'de novo' purine biosynthesis containing both 5-aminoimidazole-4-carboxamide ribonucleotide transformylase and inosine monophosphate cyclohydrolase activities, isozyme of Ade16p; ade16 ade17 mutants require adenine and histidine
YMR120C	K.YTQSNSVC@YAR.N	ADE17	3.35	674.801	0	Enzyme of 'de novo' purine biosynthesis containing both 5-aminoimidazole-4-carboxamide ribonucleotide transformylase and inosine monophosphate cyclohydrolase activities, isozyme of Ade16p; ade16 ade17 mutants require adenine and histidine
YMR146C	K.KYETDC@PLNTAVITPLK.E	TIF34	5.532	982.015	0.71	Subunit of the core complex of translation initiation factor 3(eIF3), which is essential for translation
YMR146C	K.LWDVSNGQC@VATWK.S	TIF34	4.949	832.398	-0.04	Subunit of the core complex of translation initiation factor 3(eIF3), which is essential for translation
YMR189W	K.AVDVLK#NPDVSGCLVQYPATDGSILPPDSMK.Q	GCV2	4.086	1101.55	-0.29	P subunit of the mitochondrial glycine decarboxylase complex, required for the catabolism of glycine to 5,10-methylene-THF; expression is regulated by levels of 5,10-methylene-THF in the cytoplasm
YMR189W	K.AVDVLKNPDVSGC@LVQYPATDGSILPPDSMK.Q	GCV2	5.189	1101.55	-0.95	P subunit of the mitochondrial glycine decarboxylase complex, required for the catabolism of glycine to 5,10-methylene-THF; expression is regulated by levels of 5,10-methylene-THF in the cytoplasm
YMR189W	K.TFSIPHGGGGPAGAPIC@VK.S	GCV2	3.693	608.315	1.66	P subunit of the mitochondrial glycine decarboxylase complex, required for the catabolism of glycine to 5,10-methylene-THF; expression is regulated by levels of 5,10-methylene-THF in the cytoplasm
YMR189W	R.N]VCLIPVSAHGTNPASAAMAGLK.V	GCV2	5.245	1140.09	0.47	P subunit of the mitochondrial glycine decarboxylase complex, required for the catabolism of glycine to 5,10-methylene-THF; expression is regulated by levels of 5,10-methylene-THF in the cytoplasm
YMR200W	R.QLFSDPC@NDDGVSTYSR.Y	ROT1	4.706	980.921	0.05	Essential ER membrane protein; may be involved in protein folding; mutation causes defects in cell wall synthesis and in lysis of autophagic bodies, suppresses tor2 mutations, and is synthetically lethal with kar2-1 and with rot2 mutations
YMR205C	R.GWSAEGGTNIGTAR.C	PFK2	4.503	688.831	-0.31	Beta subunit of heterooctameric phosphofructokinase involved in glycolysis, indispensable for anaerobic growth, activated by fructose-2,6-bisphosphate and AMP, mutation inhibits glucose induction of cell cycle-related genes
YMR215W	K.ESEISSDSIYK.C	GAS3	3.224	629.295	-0.81	Putative 1,3-beta-glucanosyltransferase, has similarity to Gas1p; localizes to the cell wall
YMR226C	R.DAYPTGSIYC@ASK.F	YMR226C	3.58	716.824	-0.09	NADP(+)-dependent dehydrogenase; acts on serine, L-allo-threonine, and other 3-hydroxy acids; green fluorescent protein fusion protein localizes to the cytoplasm and nucleus; may interact with ribosomes, based on co-purification experiments
YMR246W	K.KLQDAVC@K.D	FAA4	2.667	481.26	0.09	Long chain fatty acyl-CoA synthetase, regulates protein modification during growth in the presence of ethanol, functions to incorporate palmitic acid into phospholipids and neutral lipids
YMR260C	R.VEASC@FDGNKR.M	TIF11	3.764	641.796	0.03	Translation initiation factor eIF1A, essential protein that forms a complex with Sui1p (eIF1) and the 40S ribosomal subunit and scans for the start codon; C-terminus associates with Fun12p (eIF5B); N terminus interacts with eIF2 and eIF3
YMR261C	K.VDC@NNQELSNNKQER.S	TPS3	2.525	924.418	-0.37	Regulatory subunit of trehalose-6-phosphate synthase/phosphatase complex, which synthesizes the storage carbohydrate trehalose; expression is induced by stress conditions and repressed by the Ras-cAMP pathway
YMR290C	K.QNNAAPEGEQTTC@VEK.F	HAS1	3.075	888.395	-1.73	ATP-dependent RNA helicase; localizes to both the nuclear periphery and nucleolus; highly enriched in nuclear pore complex fractions; constituent of 66S pre-ribosomal particles
YMR296C	K.QSILAC@C@QESNK.-	LCB1	4	719.327	0.47	Component of serine palmitoyltransferase, responsible along with Lcb2p for the first committed step in sphingolipid synthesis, which is the condensation of serine with palmitoyl-CoA to form 3-ketosphinganine
YMR300C	R.GQDAAGIATC@GSR.G	ADE4	3.961	632.291	-0.02	Phosphoribosylpyrophosphate amidotransferase (PRPPAT; amidophosphoribosyltransferase), catalyzes first step of the 'de novo' purine nucleotide biosynthetic pathway
YMR305C	K.GITYSPYNDDGSC@K.S	SCW10	3.599	788.833	-0.41	Cell wall protein with similarity to glucanases; may play a role in conjugation during mating based on mutant phenotype and its regulation by Ste12p
YMR307W	K.MTDYFACGDD#DVK.A	GAS1	4.435	768.802	-0.53	Beta-1,3-glucanosyltransferase, required for cell wall assembly; localizes to the cell surface via a glycosylphosphatidylinositol (GPI) anchor
YMR307W	K.YGAYSFC@TPK.E	GAS1	3.072	597.268	0.11	Beta-1,3-glucanosyltransferase, required for cell wall assembly; localizes to the cell surface via a glycosylphosphatidylinositol (GPI) anchor
YMR318C	K.NDNEPYC@TK.F	ADH6	2.41	570.735	0.32	NADPH-dependent medium chain alcohol dehydrogenase with broad substrate specificity; member of the cinnamyl family of alcohol dehydrogenases; may be involved in fusel alcohol synthesis or in aldehyde tolerance
YMR318C	R.VGVGAQVFSC@LEC@DR.C	ADH6	3.489	848.893	0.38	NADPH-dependent medium chain alcohol dehydrogenase with broad substrate specificity; member of the cinnamyl family of alcohol dehydrogenases; may be involved in fusel alcohol synthesis or in aldehyde tolerance
YNL010W	K.AGEQRPVYFYC@GDGVSDLSAAK.E	YNL010W	5.05	797.374	-0.15	Putative protein of unknown function with similarity to phosphoserine phosphatases; green fluorescent protein (GFP)-fusion protein localizes to the cytoplasm and nucleus; homozygous diploid mutant shows an increase in glycogen accumulation
YNL045W	K.C]TALQWLNSK.Q	YNL045W	3.565	610.809	1.11	Leucyl aminopeptidase (leukotriene A4 hydrolase) with epoxide hydrolase activity, metalloenzyme containing one zinc atom; role in vivo is not defined; green fluorescent protein (GFP)-fusion protein localizes to the cytoplasm and nucleus
YNL055C	K.A]TMNCKLPNSNVNIEFATR.Y	POR1	3.735	732.689	0.08	Mitochondrial porin (voltage-dependent anion channel), outer membrane protein required for the maintenance of mitochondrial osmotic stability and mitochondrial membrane permeability; phosphorylated
YNL055C	R.GAFDLC@LK.S	POR1	2.232	462.236	0.05	Mitochondrial porin (voltage-dependent anion channel), outer membrane protein required for the maintenance of mitochondrial osmotic stability and mitochondrial membrane permeability; phosphorylated
YNL061W	R.LGC@TNTIVC@NYDAR.E	NOP2	4.418	828.876	-0.91	Probable RNA m(5)C methyltransferase, essential for processing and maturation of 27S pre-rRNA and large ribosomal subunit biogenesis; localized to the nucleolus; constituent of 66S pre-ribosomal particles
YNL064C	K.QILC@KECEGR[.G	YDJ1	3.04	646.808	-0.34	Protein chaperone involved in regulation of the HSP90 and HSP70 functions; involved in protein translocation across membranes; member of the DnaJ family
YNL064C	R.FQTEC@DVC@HGTGDIIDPKDR.C	YDJ1	4.25	788.351	-0.08	Protein chaperone involved in regulation of the HSP90 and HSP70 functions; involved in protein translocation across membranes; member of the DnaJ family
YNL112W	K.AEGFDKPTGIQC@QGWPMALSGR.D	DBP2	4.676	802.715	-0.56	Essential ATP-dependent RNA helicase of the DEAD-box protein family, involved in nonsense-mediated mRNA decay and rRNA processing
YNL134C	K.IGPQGALLGC@DAAGQIVK.L	YNL134C	4.585	884.475	-0.16	Putative protein of unknown function with similarity to dehydrogenases from other model organisms; green fluorescent protein (GFP)-fusion protein localizes to both the cytoplasm and nucleus and is induced by the DNA-damaging agent MMS
YNL135C	K.FDSSVDRGSPFQC@NIGVGQVIK.G	FPR1	5.163	804.065	-0.16	Peptidyl-prolyl cis-trans isomerase (PPIase), binds to the drugs FK506 and rapamycin; also binds to the nonhistone chromatin binding protein Hmo1p and may regulate its assembly or function
YNL135C	R.GSPFQC@NIGVGQVIK.G	FPR1	3.694	802.416	-0.29	Peptidyl-prolyl cis-trans isomerase (PPIase), binds to the drugs FK506 and rapamycin; also binds to the nonhistone chromatin binding protein Hmo1p and may regulate its assembly or function
YNL138W	K.NNKPSDSGADANTTNEPSAENAPEVEQDPK.C	SRV2	5.568	1042.8	-0.52	CAP (cyclase-associated protein) subunit of adenylyl cyclase complex; N-terminus binds adenylyl cyclase and facilitates activation by RAS; C-terminus binds ADP-actin monomers, facilitating regulation of actin dynamics and cell morphogenesis
YNL157W	R.I]STCPSTASTAGVVDNATLIQK.E	YNL157W	4.056	1117.57	-2.38	Hypothetical protein
YNL166C	R.LADQTPHDDNSENC@PNR.S	BNI5	2.396	991.917	0.31	Protein involved in organization of septins at the mother-bud neck, may interact directly with the Cdc11p septin, localizes to bud neck in a septin-dependent manner
YNL209W	R.TFTTVSDNQTTVQFPVYQGERVNCK#.E	SSB2	3.607	973.804	1	Cytoplasmic ATPase that is a ribosome-associated molecular chaperone, functions with J-protein partner Zuo1p; may be involved in the folding of newly-synthesized polypeptide chains; member of the HSP70 family; homolog of SSB1
YNL219C	R.YIDYC@LFEKPTETTN.-	ALG9	4.641	947.433	1.12	Mannosyltransferase, involved in N-linked glycosylation; catalyzes the transfer of mannose from Dol-P-Man to lipid-linked oligosaccharides; mutation of the human ortholog causes type 1 congenital disorders of glycosylation
YNL241C	K.SEDGSKPAYVDDDTVDKDSK.C	ZWF1	4.808	724.325	-0.43	Glucose-6-phosphate dehydrogenase (G6PD), catalyzes the first step of the pentose phosphate pathway; involved in adapting to oxidatve stress; homolog of the human G6PD which is deficient in patients with hemolytic anemia
YNL244C	K.DFAC@NGNIVKDPEMGEIIQLQGDQR.A	SUI1	5.427	955.116	-0.24	Translation initiation factor eIF1; component of a complex involved in recognition of the initiator codon; modulates translation accuracy at the initiation phase
YNL247W	K.VHSAFC@DNLSTPVALK.T	YNL247W	4.541	879.944	-2.14	Essential protein of unknown function; may interact with ribosomes, based on co-purification experiments
YNL287W	R.LLPSEEAAC@YVAFK.K	SEC21	3.262	799.401	0.92	Gamma subunit of coatomer, a heptameric protein complex that together with Arf1p forms the COPI coat; involved in ER to Golgi transport of selective cargo
YNL292W	K.E#CIVSSDQPGDEATAETIETANAEEHSNTLK.R	PUS4	3.389	1116.17	-0.08	Pseudouridine synthase, catalyzes only the formation of pseudouridine-55 (Psi55), a highly conserved tRNA modification, in mitochondrial and cytoplasmic tRNAs; PUS4 overexpression leads to translational derepression of GCN4 (Gcd- phenotype)
YNL301C	K.A]GGECITLDQLAVRAPK.G	RPL18B	4.576	899.976	-2.01	Protein component of the large (60S) ribosomal subunit, identical to Rpl18Ap and has similarity to rat L18 ribosomal protein
YNL301C	K.AGGEC@ITLDQLAVR.A	RPL18B	3.981	751.885	-0.38	Protein component of the large (60S) ribosomal subunit, identical to Rpl18Ap and has similarity to rat L18 ribosomal protein
YNR016C	K.GC@C@TSPEDGLQK.A	ACC1	3.763	676.284	-0.27	Acetyl-CoA carboxylase, biotin containing enzyme that catalyzes the carboxylation of acetyl-CoA to form malonyl-CoA; required for de novo biosynthesis of long-chain fatty acids
YNR016C	K.TIIGSEDGLGVEC@LR.G	ACC1	4.305	809.909	0.2	Acetyl-CoA carboxylase, biotin containing enzyme that catalyzes the carboxylation of acetyl-CoA to form malonyl-CoA; required for de novo biosynthesis of long-chain fatty acids
YNR016C	K.VPC@IPWSGTGVDTVHVDEK.T	ACC1	4.413	699.342	0.14	Acetyl-CoA carboxylase, biotin containing enzyme that catalyzes the carboxylation of acetyl-CoA to form malonyl-CoA; required for de novo biosynthesis of long-chain fatty acids
YNR046W	K.A]CDTSNDNFPLQYDGSK.C	TRM112	5.556	966.407	-0.3	Subunit of an adoMet-dependent tRNA methyltransferase (MTase) complex (Trm11p-Trm112p), required for the methylation of the guanosine nucleotide at position 10 (m2G10) in tRNAs; putative zinc binding subunit of other MTase-related proteins
YNR046W	K.FLTTNFLK.C	TRM112	2.628	492.282	0.15	Subunit of an adoMet-dependent tRNA methyltransferase (MTase) complex (Trm11p-Trm112p), required for the methylation of the guanosine nucleotide at position 10 (m2G10) in tRNAs; putative zinc binding subunit of other MTase-related proteins
YNR050C	R.GNALDTLC@AR.L	LYS9	3.305	545.769	0	Saccharopine dehydrogenase (NADP+, L-glutamate-forming); catalyzes the formation of saccharopine from alpha-aminoadipate 6-semialdehyde, which is the seventh step in lysine biosynthesis pathway
YOL030W	R.QLAAEYFNCGD#EADAR.I	GAS5	4.082	915.393	1.61	1,3-beta-glucanosyltransferase, has similarity to Gas1p; localizes to the cell wall
YOL030W	R.VYTVDNSQDHSH#CMK.L	GAS5	1.951	607.594	-0.71	1,3-beta-glucanosyltransferase, has similarity to Gas1p; localizes to the cell wall
YOL038W	K.NYDRKEPPATVEECVK[.L	PRE6	3.56	645.647	-0.16	Alpha 4 subunit of the 20S proteasome; may replace alpha 3 subunit (Pre9p) under stress conditions to create a more active proteasomal isoform; GFP-fusion protein relocates from cytosol to the mitochondrial surface upon oxidative stress
YOL058W	R.LIYNGSYFTPEC@EYIR.S	ARG1	4.127	1012.98	1.1	Arginosuccinate synthetase, catalyzes the formation of L-argininosuccinate from citrulline and L-aspartate in the arginine biosynthesis pathway; potential Cdc28p substrate
YOL086C	K.C]C@SDVFNQVVK.S	ADH1	4.304	678.308	0.27	Alcohol dehydrogenase, fermentative isozyme active as homo- or heterotetramers; required for the reduction of acetaldehyde to ethanol, the last step in the glycolytic pathway
YOL086C	R.ANGTTVLVGMPAGAK.C	ADH1	4.109	701.871	-0.21	Alcohol dehydrogenase, fermentative isozyme active as homo- or heterotetramers; required for the reduction of acetaldehyde to ethanol, the last step in the glycolytic pathway
YOR021C	R.VC@LLDPR.A	YOR021C	2.002	436.737	0.74	Putative protein of unknown function; YOR021C is not an essential gene
YOR027W	K.KFSDALNDANEC@VK.I	STI1	5.177	805.877	-0.92	Hsp90 cochaperone, interacts with the Ssa group of the cytosolic Hsp70 chaperones; activates the ATPase activity of Ssa1p; homolog of mammalian Hop protein
YOR027W	K.LMSFPEAIADC@NK.A	STI1	3.833	756.347	0.23	Hsp90 cochaperone, interacts with the Ssa group of the cytosolic Hsp70 chaperones; activates the ATPase activity of Ssa1p; homolog of mammalian Hop protein
YOR063W	K.G]CIPGNR.K	RPL3	1.643	387.19	0.04	Protein component of the large (60S) ribosomal subunit, has similarity to E. coli L3 and rat L3 ribosomal proteins; involved in the replication and maintenance of killer double stranded RNA virus
YOR063W	K.VAC@IGAWHPAHVMWSVAR.A	RPL3	3.226	1032.51	-0.91	Protein component of the large (60S) ribosomal subunit, has similarity to E. coli L3 and rat L3 ribosomal proteins; involved in the replication and maintenance of killer double stranded RNA virus
YOR122C	R.HDAEGVVC@VR.T	PFY1	3.336	571.275	0.12	Profilin, actin- and phosphatidylinositol 4,5-bisphosphate-binding protein, involved in cytoskeleton organization, required for normal timing of actin polymerization in response to thermal stress; localizes to plasma membrane and cytosol
YOR128C	K.DNIC@DLC@YAPAR.V	ADE2	3.701	734.322	0.29	Phosphoribosylaminoimidazole carboxylase, catalyzes a step in the 'de novo' purine nucleotide biosynthetic pathway; red pigment accumulates in mutant cells deprived of adenine
YOR128C	K.GSC@LDGVDSLHSIVQMPR.G	ADE2	4.067	985.975	0.55	Phosphoribosylaminoimidazole carboxylase, catalyzes a step in the 'de novo' purine nucleotide biosynthetic pathway; red pigment accumulates in mutant cells deprived of adenine
YOR142W	K.TRLVGPNC@PGIINPATK.V	LSC1	3.777	904.496	-0.46	Alpha subunit of succinyl-CoA ligase, which is a mitochondrial enzyme of the TCA cycle that catalyzes the nucleotide-dependent conversion of succinyl-CoA to succinate; phosphorylated
YOR142W	R.LVGPNC@PGIINPATK.V	LSC1	3.718	775.922	0.12	Alpha subunit of succinyl-CoA ligase, which is a mitochondrial enzyme of the TCA cycle that catalyzes the nucleotide-dependent conversion of succinyl-CoA to succinate; phosphorylated
YOR151C	K.N]CYLSEATESDLYK.L	RPB2	4.693	846.875	0.76	RNA polymerase II second largest subunit B150, part of central core; similar to bacterial beta subunit
YOR153W	K.NMAHLSAADPDFYKPYSLGCAWK[.N	PDR5	4.643	886.742	-0.18	Plasma membrane ATP-binding cassette (ABC) transporter, short-lived multidrug transporter actively regulated by Pdr1p; also involved in steroid transport, cation resistance, and cellular detoxification during exponential growth
YOR153W	K.TVYFGDLGEGC@K.T	PDR5	2.666	673.308	-0.94	Plasma membrane ATP-binding cassette (ABC) transporter, short-lived multidrug transporter actively regulated by Pdr1p; also involved in steroid transport, cation resistance, and cellular detoxification during exponential growth
YOR153W	K.YFEDMGYVC@PSR.Q	PDR5	3.627	770.315	-0.88	Plasma membrane ATP-binding cassette (ABC) transporter, short-lived multidrug transporter actively regulated by Pdr1p; also involved in steroid transport, cation resistance, and cellular detoxification during exponential growth
YOR163W	K.GGVEKDEPNYETTAQRETWEEAGC@IGK.I	DDP1	3.73	1018.8	0.62	Polyphosphate phosphatase; hydrolyzes diphosphorylated inositol polyphosphates and diadenosine polyphosphates; has high specificity for diadenosine hexa- and pentaphosphates; member of the MutT family of nucleotide hydrolases
YOR204W	K.A]CVVYGGSPIGNQLR.E	DED1	4.696	795.906	-1.15	ATP-dependent DEAD (Asp-Glu-Ala-Asp)-box RNA helicase, required for translation initiation of all yeast mRNAs; mutations in human DEAD-box DBY are a frequent cause of male infertility
YOR204W	R.DLMAC@AQTGSGK.T	DED1	3.888	627.776	-0.67	ATP-dependent DEAD (Asp-Glu-Ala-Asp)-box RNA helicase, required for translation initiation of all yeast mRNAs; mutations in human DEAD-box DBY are a frequent cause of male infertility
YOR204W	R.G]CDLLVATPGR.L	DED1	3.432	579.8	-0.94	ATP-dependent DEAD (Asp-Glu-Ala-Asp)-box RNA helicase, required for translation initiation of all yeast mRNAs; mutations in human DEAD-box DBY are a frequent cause of male infertility
YOR204W	R.HIVEDC@DMTPVGER.Q	DED1	4.31	837.366	-0.92	ATP-dependent DEAD (Asp-Glu-Ala-Asp)-box RNA helicase, required for translation initiation of all yeast mRNAs; mutations in human DEAD-box DBY are a frequent cause of male infertility
YOR209C	K.IIC@YSDSLNVEK.A	NPT1	3.342	720.856	0.38	Nicotinate phosphoribosyltransferase, acts in the salvage pathway of NAD+ biosynthesis; required for silencing at rDNA and telomeres and has a role in silencing at mating-type loci; localized to the nucleus
YOR220W	R.SNAASC@TENDVNATASNPPK.S	YOR220W	5.145	1024.45	-0.06	Protein of unknown function; green fluorescent protein (GFP)-fusion protein localizes to the cytoplasm and is induced in response to the DNA-damaging agent MMS
YOR224C	K.VC@RIEAASTTQDQC@K.L	RPB8	5.135	883.912	-0.12	RNA polymerase subunit ABC14.5, common to RNA polymerases I, II, and III
YOR230W	R.FFDNHIFASC@SDDNILR.F	WTM1	4.713	690.983	0.06	Transcriptional modulator involved in regulation of meiosis, silencing, and expression of RNR genes; required for nuclear localization of the ribonucleotide reductase small subunit Rnr2p and Rnr4p; contains WD repeats
YOR267C	R.FLNHSDC@SAINQQQPAHESNLK.T	HRK1	5.854	846.731	-0.55	Protein kinase implicated in activation of the plasma membrane H(+)-ATPase Pma1p in response to glucose metabolism; plays a role in ion homeostasis
YOR276W	K.VTTDSDGWC@TFEAK.K	CAF20	4.809	808.849	0.38	Phosphoprotein of the mRNA cap-binding complex involved in translational control, repressor of cap-dependent translation initiation, competes with eIF4G for binding to eIF4E
YOR323C	K.TNYPAGC@NAMETLLINPK.F	PRO2	4.536	1003.99	-0.71	Gamma-glutamyl phosphate reductase, catalyzes the second step in proline biosynthesis
YOR335C	K.DNFWEMGDQGPC@GPC@SEIHYDR.I	ALA1	3.906	896.017	-1.07	Cytoplasmic alanyl-tRNA synthetase, required for protein synthesis; point mutation (cdc64-1 allele) causes cell cycle arrest at G1; lethality of null mutation is functionally complemented by human homolog
YOR335C	K.TC@FYAEQGGQEYDTGK.I	ALA1	4.63	927.386	0.12	Cytoplasmic alanyl-tRNA synthetase, required for protein synthesis; point mutation (cdc64-1 allele) causes cell cycle arrest at G1; lethality of null mutation is functionally complemented by human homolog
YOR335C	R.VAHGC@YISNAALAK.G	ALA1	4.59	737.878	0.64	Cytoplasmic alanyl-tRNA synthetase, required for protein synthesis; point mutation (cdc64-1 allele) causes cell cycle arrest at G1; lethality of null mutation is functionally complemented by human homolog
YOR356W	R.LQINSQNC@IHC@K.T	YOR356W	3.776	757.863	-0.75	Mitochondrial protein with similarity to flavoprotein-type oxidoreductases; found in a large supramolecular complex with other mitochondrial dehydrogenases
YOR361C	K.TQFSNLQIC@R.L	PRT1	3.314	633.817	0.53	Subunit of the core complex of translation initiation factor 3(eIF3), essential for translation; part of a subcomplex (Prt1p-Rpg1p-Nip1p) that stimulates binding of mRNA and tRNA(i)Met to ribosomes
YOR375C	K.RIMINC@FNEC@IDYAK.K	GDH1	4.896	973.949	-1.18	NADP(+)-dependent glutamate dehydrogenase, synthesizes glutamate from ammonia and alpha-ketoglutarate; rate of alpha-ketoglutarate utilization differs from Gdh3p; expression regulated by nitrogen and carbon sources
YOR375C	K.VDIALPC@ATQNEVSGEEAK.A	GDH1	4.192	1015.99	-0.29	NADP(+)-dependent glutamate dehydrogenase, synthesizes glutamate from ammonia and alpha-ketoglutarate; rate of alpha-ketoglutarate utilization differs from Gdh3p; expression regulated by nitrogen and carbon sources
YOR375C	R.IMINC@FNEC@IDYAK.K	GDH1	4.035	903.896	-0.4	NADP(+)-dependent glutamate dehydrogenase, synthesizes glutamate from ammonia and alpha-ketoglutarate; rate of alpha-ketoglutarate utilization differs from Gdh3p; expression regulated by nitrogen and carbon sources
YOR380W	R.K#CNGKSPCEMC@VAYGYVCHYIDGR[.V	RDR1	2.516	956.411	0.31	Transcriptional repressor involved in the control of multidrug resistance; negatively regulates expression of the PDR5 gene; member of the Gal4p family of zinc cluster proteins
YPL028W	K.AIILGAQSIK.C	ERG10	2.941	507.321	-0.05	Acetyl-CoA C-acetyltransferase (acetoacetyl-CoA thiolase), cytosolic enzyme that transfers an acetyl group from one acetyl-CoA molecule to another, forming acetoacetyl-CoA; involved in the first step in mevalonate biosynthesis
YPL028W	K.C@GNADVVVAGGC@ESMTNAPYYMPAAR.A	ERG10	5.734	926.397	-1.12	Acetyl-CoA C-acetyltransferase (acetoacetyl-CoA thiolase), cytosolic enzyme that transfers an acetyl group from one acetyl-CoA molecule to another, forming acetoacetyl-CoA; involved in the first step in mevalonate biosynthesis
YPL028W	K.C]GNADVVVAGGC@ESMTNAPYYMPAAR.A	ERG10	4.127	926.398	0.54	Acetyl-CoA C-acetyltransferase (acetoacetyl-CoA thiolase), cytosolic enzyme that transfers an acetyl group from one acetyl-CoA molecule to another, forming acetoacetyl-CoA; involved in the first step in mevalonate biosynthesis
YPL028W	K.VC@ASAMK.A	ERG10	2.133	383.683	0.42	Acetyl-CoA C-acetyltransferase (acetoacetyl-CoA thiolase), cytosolic enzyme that transfers an acetyl group from one acetyl-CoA molecule to another, forming acetoacetyl-CoA; involved in the first step in mevalonate biosynthesis
YPL028W	K.VNVYGGAVALGHPLGC@SGAR.V	ERG10	4.568	978	0.31	Acetyl-CoA C-acetyltransferase (acetoacetyl-CoA thiolase), cytosolic enzyme that transfers an acetyl group from one acetyl-CoA molecule to another, forming acetoacetyl-CoA; involved in the first step in mevalonate biosynthesis
YPL061W	K.NAGQIC@SSGSR.I	ALD6	3.812	568.759	0.33	Cytosolic aldehyde dehydrogenase, activated by Mg2+ and utilizes NADP+ as the preferred coenzyme; required for conversion of acetaldehyde to acetate; constitutively expressed; locates to the mitochondrial outer surface upon oxidative stress
YPL106C	K.VLGTAC@DK.H	SSE1	2.389	432.218	-0.05	ATPase that is a component of the heat shock protein Hsp90 chaperone complex; binds unfolded proteins; member of the heat shock protein 70 (HSP70) family; localized to the cytoplasm
YPL111W	K.DVPHC@PESLK.W	CAR1	2.214	591.285	0.3	Arginase, responsible for arginine degradation, expression responds to both induction by arginine and nitrogen catabolite repression; disruption enhances freeze tolerance
YPL127C	K.C@VENGELVQPK.G	HHO1	4.307	636.816	-0.21	Histone H1, a linker histone required for nucleosome packaging at restricted sites; suppresses DNA repair involving homologous recombination; not required for telomeric silencing, basal transcriptional repression, or efficient sporulation
YPL127C	K.C]VENGELVQPK.G	HHO1	3.457	636.816	-0.07	Histone H1, a linker histone required for nucleosome packaging at restricted sites; suppresses DNA repair involving homologous recombination; not required for telomeric silencing, basal transcriptional repression, or efficient sporulation
YPL153C	R.FLIEK#FSQEQIGE#NIVC@R.V	RAD53	3.342	775.395	0.06	Protein kinase, required for cell-cycle arrest in response to DNA damage; activated by trans autophosphorylation when interacting with hyperphosphorylated Rad9p; also interacts with ARS1 and plays a role in initiation of DNA replication
YPL226W	K.IPEC@QSITDC@K.N	NEW1	3.876	675.806	1.53	ATP binding cassette family member; Asn/Gln-rich rich region supports [NU+] prion formation, susceptibility to [PSI+] prion induction and aggregation of a fragment of the human Machado-Joseph Disease protein
YPL226W	K.IPEC@QSITDC@KNQIK.L	NEW1	2.885	917.446	0.43	ATP binding cassette family member; Asn/Gln-rich rich region supports [NU+] prion formation, susceptibility to [PSI+] prion induction and aggregation of a fragment of the human Machado-Joseph Disease protein
YPL231W	K.TLGEQLIENC@K.Q	FAS2	4.064	652.829	0.02	Alpha subunit of fatty acid synthetase, which catalyzes the synthesis of long-chain saturated fatty acids; contains beta-ketoacyl reductase and beta-ketoacyl synthase activities; phosphorylated
YPL231W	R.EILC@YSK.D	FAS2	2.316	456.728	-0.1	Alpha subunit of fatty acid synthetase, which catalyzes the synthesis of long-chain saturated fatty acids; contains beta-ketoacyl reductase and beta-ketoacyl synthase activities; phosphorylated
YPL231W	R.NFTPQEIEYC@SAQPSVQSSFAGTWSAK.E	FAS2	5.114	1007.46	-1.43	Alpha subunit of fatty acid synthetase, which catalyzes the synthesis of long-chain saturated fatty acids; contains beta-ketoacyl reductase and beta-ketoacyl synthase activities; phosphorylated
YPR004C	K.SSYSC@SNLEK.L	YPR004C	2.336	587.756	-0.32	Protein with similarity to mammalian electron transfer flavoprotein complex subunit ETF-alpha; interacts with yeast frataxin Yfh1p; null mutant displays increased frequency of mitochondrial genome loss (petite formation)
YPR010C	R.EC@GSILTTQQSVPR.I	RPA135	4.34	788.393	-0.2	RNA polymerase I subunit A135
YPR024W	K.DNTTSGC@GSDLQSATGTAR.A	YME1	5.227	949.912	1.26	Subunit, with Mgr1p, of the mitochondrial inner membrane i-AAA protease complex, which is responsible for degradation of unfolded or misfolded mitochondrial gene products; mutation causes an elevated rate of mitochondrial turnover
YPR024W	K.DNTTSGCGSD#LQSATGTAR.A	YME1	4.343	949.911	0.61	Subunit, with Mgr1p, of the mitochondrial inner membrane i-AAA protease complex, which is responsible for degradation of unfolded or misfolded mitochondrial gene products; mutation causes an elevated rate of mitochondrial turnover
YPR033C	K.LIYNLEDQGGELC@SLR.Y	HTS1	4.603	940.464	-0.26	Cytoplasmic and mitochondrial histidine tRNA synthetase; encoded by a single nuclear gene that specifies two messages; efficient mitochondrial localization requires both a presequence and an amino-terminal sequence
YPR035W	K.GGYPAPQGPYYC@GVGAGK.V	GLN1	4.049	899.915	0.21	Glutamine synthetase (GS), synthesizes glutamine from glutamate and ammonia; with Glt1p, forms the secondary pathway for glutamate biosynthesis from ammonia; expression regulated by nitrogen source and by amino acid limitation
YPR060C	R.DIEC@LQSLSR.R	ARO7	2.84	610.801	-0.14	Chorismate mutase, catalyzes the conversion of chorismate to prephenate to initiate the tyrosine/phenylalanine-specific branch of aromatic amino acid biosynthesis
YPR060C	R.SHFATC@PSVYEANHPGLEIPNFK.G	ARO7	3.321	872.416	-0.41	Chorismate mutase, catalyzes the conversion of chorismate to prephenate to initiate the tyrosine/phenylalanine-specific branch of aromatic amino acid biosynthesis
YPR062W	K.EGGVPIGGC@LINNK.D	FCY1	3.747	714.369	0.27	Cytosine deaminase, zinc metalloenzyme that catalyzes the hydrolytic deamination of cytosine to uracil; of biomedical interest because it also catalyzes the deamination of 5-fluorocytosine (5FC) to form anticancer drug 5-fluorouracil (5FU)
YPR093C	K.IIQC@SICGD#TDVSR.L	ASR1	2.238	541.92	0.26	Protein involved in a putative alcohol-responsive signaling pathway; accumulates in the nucleus under alcohol stress; contains a Ring/PHD finger domain
YPR124W	K.KTPTQEEGC@NC@ATDSGK.N	CTR1	2.546	941.899	0.32	High-affinity copper transporter of the plasma membrane, mediates nearly all copper uptake under low copper conditions; transcriptionally induced at low copper levels and degraded at high copper levels
YPR145W	K.C@LTDDC@DTITAFPPGHVYDSK.T	ASN1	4.391	804.687	-0.77	Asparagine synthetase, isozyme of Asn2p; catalyzes the synthesis of L-asparagine from L-aspartate in the asparagine biosynthetic pathway
YPR145W	K.C]LTDDC@DTITAFPPGHVYDSK.T	ASN1	4.179	804.687	-0.47	Asparagine synthetase, isozyme of Asn2p; catalyzes the synthesis of L-asparagine from L-aspartate in the asparagine biosynthetic pathway
YPR145W	K.TVYFASELK.C	ASN1	2.805	529.282	-0.08	Asparagine synthetase, isozyme of Asn2p; catalyzes the synthesis of L-asparagine from L-aspartate in the asparagine biosynthetic pathway
YPR181C	K.EYDELNVAPYNPVVC@SGPH#CK.S	SEC23	4.885	1224.55	0.54	GTPase-activating protein; component of the Sec23p-Sec24p heterodimeric complex of the COPII vesicle coat, involved in ER to Golgi transport and autophagy; stimulates the GDP-bound form of Sar1p
YPR181C	K.EYDELNVAPYNPVVCSGPH#C@K.S	SEC23	3.658	816.703	0	GTPase-activating protein; component of the Sec23p-Sec24p heterodimeric complex of the COPII vesicle coat, involved in ER to Golgi transport and autophagy; stimulates the GDP-bound form of Sar1p
YPR181C	R.NSSWSC@PIC@NSR.N	SEC23	3.667	734.309	0.38	GTPase-activating protein; component of the Sec23p-Sec24p heterodimeric complex of the COPII vesicle coat, involved in ER to Golgi transport and autophagy; stimulates the GDP-bound form of Sar1p
YPR183W	K.GQYLVCMD#ADLQHPPETVPK.L	DPM1	3.12	1149.55	-0.02	Dolichol phosphate mannose (Dol-P-Man) synthase of the ER membrane, catalyzes the formation of Dol-P-Man from Dol-P and GDP-Man; required for glycosyl phosphatidylinositol membrane anchoring, O mannosylation, and protein glycosylation
YPR184W	R.LSDTGEPITSC@SYGK.G	GDB1	4.009	807.868	-1.79	Glycogen debranching enzyme containing glucanotranferase and alpha-1,6-amyloglucosidase activities, required for glycogen degradation; phosphorylated in mitochondria
YPR191W	R.YDYAVAEQC@PVK.S	QCR2	4.737	721.835	-0.21	Subunit 2 of the ubiquinol cytochrome-c reductase complex, which is a component of the mitochondrial inner membrane electron transport chain; phosphorylated; transcription is regulated by Hap1p, Hap2p/Hap3p, and heme

## Sheet: Expt. 2
Table S2(B). Peptides containing cysteine identified from the second experiment with the reduction/alkylation, but without the enrichment
Reference	Peptide	Gene symbol	XCorr	Obs m/z	PPM	Annotation
YAL005C	R.ARFEELC@ADLFR.S	SSA1	3.511	763.875	0.45	ATPase involved in protein folding and nuclear localization signal (NLS)-directed nuclear transport; member of heat shock protein 70 (HSP70) family; forms a chaperone complex with Ydj1p; localized to the nucleus, cytoplasm, and cell wall
YAL005C	R.FEELC@ADLFR.S	SSA1	3.614	650.305	-0.65	ATPase involved in protein folding and nuclear localization signal (NLS)-directed nuclear transport; member of heat shock protein 70 (HSP70) family; forms a chaperone complex with Ydj1p; localized to the nucleus, cytoplasm, and cell wall
YAL016W	K.SLAEC@QELLKN.-	TPD3	3.341	652.83	0.21	Regulatory subunit A of the heterotrimeric protein phosphatase 2A, which also contains regulatory subunit Cdc55p and either catalytic subunit Pph21p or Pph22p; required for cell morphogenesis and for transcription by RNA polymerase III
YAL023C	K.NQALGGSLLHSHIQTYPDGSNQQQVTC@YGYK.D	PMT2	5.398	1155.55	-1.1	Protein O-mannosyltransferase, transfers mannose residues from dolichyl phosphate-D-mannose to protein serine/threonine residues; acts in a complex with Pmt1p, can instead interact with Pmt5p in some conditions; target for new antifungals
YAL035W	R.SPIC@C@ILGHVDTGK.T	FUN12	3.866	519.59	0.42	GTPase, required for general translation initiation by promoting Met-tRNAiMet binding to ribosomes and ribosomal subunit joining; homolog of bacterial IF2
YAL038W	K.A]CDDKIMYVDYK.N	CDC19	3.777	760.842	0.07	Pyruvate kinase, functions as a homotetramer in glycolysis to convert phosphoenolpyruvate to pyruvate, the input for aerobic (TCA cycle) or anaerobic (glucose fermentation) respiration
YAL038W	K.SNLAGKPVIC@ATQMLESMTYNPRPTR.A	CDC19	3.343	738.619	0.36	Pyruvate kinase, functions as a homotetramer in glycolysis to convert phosphoenolpyruvate to pyruvate, the input for aerobic (TCA cycle) or anaerobic (glucose fermentation) respiration
YAL038W	K.YRPNC@PIILVTR.C	CDC19	3.791	751.419	0.06	Pyruvate kinase, functions as a homotetramer in glycolysis to convert phosphoenolpyruvate to pyruvate, the input for aerobic (TCA cycle) or anaerobic (glucose fermentation) respiration
YAL038W	R.AEVSDVGNAILDGADC@VMLSGETAK.G	CDC19	5.897	846.729	1.47	Pyruvate kinase, functions as a homotetramer in glycolysis to convert phosphoenolpyruvate to pyruvate, the input for aerobic (TCA cycle) or anaerobic (glucose fermentation) respiration
YAL042W	K.INEHLNEGC@R.I	ERV46	3.189	621.288	-0.79	Protein localized to COPII-coated vesicles, forms a complex with Erv41p; involved in the membrane fusion stage of transport
YAL042W	K.V]CC@QDC@DAVR.S	ERV46	2.866	641.753	0.35	Protein localized to COPII-coated vesicles, forms a complex with Erv41p; involved in the membrane fusion stage of transport
YAL060W	K.FYNSKPCD#AC@QR.G	BDH1	3.411	773.332	0.06	NAD-dependent (R,R)-butanediol dehydrogenase, catalyzes oxidation of (R,R)-2,3-butanediol to (3R)-acetoin, oxidation of meso-butanediol to (3S)-acetoin, and reduction of acetoin; enhances use of 2,3-butanediol as an aerobic carbon source
YAL062W	R.IC@YAFMR.E	GDH3	2.486	480.725	-0.16	NADP(+)-dependent glutamate dehydrogenase, synthesizes glutamate from ammonia and alpha-ketoglutarate; rate of alpha-ketoglutarate utilization differs from Gdh1p; expression regulated by nitrogen and carbon sources
YAR007C	K.VLEQPDGTWR.C	RFA1	3.186	600.804	0.26	Subunit of heterotrimeric Replication Protein A (RPA), which is a highly conserved single-stranded DNA binding protein involved in DNA replication, repair, and recombination
YAR009C	K.NGITPC@YTTTADSR.A	YAR009C	3.249	778.854	-0.29	Retrotransposon TYA Gag and TYB Pol genes; in YARCTY1-1 TYB is mutant and probably non-functional
YAR010C	K.EVHTNQDPLDVSASKTEEC@EK.A	YAR010C	5.05	806.036	-0.29	Retrotransposon TYA Gag gene co-transcribed with TYB Pol; in YARCTY1-1 TYB is mutant and probably non-functional
YAR010C	K.VAC@QLIMR.G	YAR010C	2.95	503.762	-0.86	Retrotransposon TYA Gag gene co-transcribed with TYB Pol; in YARCTY1-1 TYB is mutant and probably non-functional
YBL024W	R.LVNC@DDKLPGLIR.S	NCL1	2.624	504.945	0.5	S-adenosyl-L-methionine-dependent tRNA: m5C-methyltransferase, methylates cytosine to m5C at several positions in tRNAs and intron-containing pre-tRNAs; similar to Nop2p and human proliferation associated nucleolar protein p120
YBL030C	K.YAGILDCFKR[.T	PET9	1.788	414.881	-0.02	Major ADP/ATP carrier of the mitochondrial inner membrane, exchanges cytosolic ADP for mitochondrially synthesized ATP; phosphorylated; required for viability in many common lab strains carrying a mutation in the polymorphic SAL1 gene
YBL039C	R.C]EILELK.N	URA7	2.571	452.744	-0.58	Major CTP synthase isozyme (see also URA8), catalyzes the ATP-dependent transfer of the amide nitrogen from glutamine to UTP, forming CTP, the final step in de novo biosynthesis of pyrimidines; involved in phospholipid biosynthesis
YBL050W	K.AGNEDEAGNTYVEAYK.C	SEC17	4.855	865.879	0.21	Peripheral membrane protein required for vesicular transport between ER and Golgi and for the 'priming' step in homotypic vacuole fusion, part of the cis-SNARE complex; has similarity to alpha-SNAP
YBL050W	K.KAGNEDEAGNTYVEAYK.C	SEC17	5.85	929.926	0.19	Peripheral membrane protein required for vesicular transport between ER and Golgi and for the 'priming' step in homotypic vacuole fusion, part of the cis-SNARE complex; has similarity to alpha-SNAP
YBL076C	K.LGITGKDDVFKYGLENYNNECR[.S	ILS1	4.044	869.083	-0.64	Cytoplasmic isoleucine-tRNA synthetase, target of the G1-specific inhibitor reveromycin A
YBL076C	K.YGLENYNNEC@R.S	ILS1	3.439	716.301	-0.53	Cytoplasmic isoleucine-tRNA synthetase, target of the G1-specific inhibitor reveromycin A
YBL076C	R.VISDDYVTSDSGTGIVHNAPAFGEEDNAAC@LK.N	ILS1	5.403	1118.18	-0.49	Cytoplasmic isoleucine-tRNA synthetase, target of the G1-specific inhibitor reveromycin A
YBL087C	K.E#CADLWPR.V	RPL23A	2.485	523.74	0.74	Protein component of the large (60S) ribosomal subunit, identical to Rpl23Bp and has similarity to E. coli L14 and rat L23 ribosomal proteins
YBL087C	K.EC@ADLWPR.V	RPL23A	2.607	523.74	0.47	Protein component of the large (60S) ribosomal subunit, identical to Rpl23Bp and has similarity to E. coli L14 and rat L23 ribosomal proteins
YBL087C	R.ISLGLPVGAIMNC@ADNSGAR.N	RPL23A	4.875	678.003	0.05	Protein component of the large (60S) ribosomal subunit, identical to Rpl23Bp and has similarity to E. coli L14 and rat L23 ribosomal proteins
YBR011C	R.NC@FPHHGYIHNYGAFPQTWEDPNVSHPETK.A	IPP1	2.621	716.724	-0.15	Cytoplasmic inorganic pyrophosphatase (PPase), catalyzes the rapid exchange of oxygens from Pi with water, highly expressed and essential for viability, active-site residues show identity to those from E. coli PPase
YBR025C	K.C]EDVFEYKDDSAIK.A	OLA1	5.48	859.883	0.16	P-loop ATPase with similarity to human OLA1 and bacterial YchF; identified as specifically interacting with the proteasome; protein levels are induced by hydrogen peroxide
YBR025C	K.LC@EIYKK.T	OLA1	1.945	318.509	-0.23	P-loop ATPase with similarity to human OLA1 and bacterial YchF; identified as specifically interacting with the proteasome; protein levels are induced by hydrogen peroxide
YBR025C	K.STFFQAITR.C	OLA1	3.118	535.785	0.58	P-loop ATPase with similarity to human OLA1 and bacterial YchF; identified as specifically interacting with the proteasome; protein levels are induced by hydrogen peroxide
YBR025C	R.C]PLGNPANYPFATIDPEEAR.V	OLA1	5.183	1116.52	-0.69	P-loop ATPase with similarity to human OLA1 and bacterial YchF; identified as specifically interacting with the proteasome; protein levels are induced by hydrogen peroxide
YBR026C	K.SLIYSTHEVEDC@TK.V	ETR1	4.952	841.39	-0.44	2-enoyl thioester reductase, member of the medium chain dehydrogenase/reductase family; localized to in mitochondria, where it has a probable role in fatty acid synthesis
YBR031W	R.SGQGAFGNMC@R.G	RPL4A	2.898	600.747	-1.05	N-terminally acetylated protein component of the large (60S) ribosomal subunit, nearly identical to Rpl4Bp and has similarity to E. coli L4 and rat L4 ribosomal proteins
YBR035C	R.FKDAEDIPC@PDYWGGLR.I	PDX3	3.052	680.316	0.01	Pyridoxine (pyridoxamine) phosphate oxidase, has homologs in E. coli and Myxococcus xanthus; transcription is under the general control of nitrogen metabolism
YBR048W	K.C]PFTGLVSIR.G	RPS11B	3.357	575.308	0.04	Protein component of the small (40S) ribosomal subunit; identical to Rps11Ap and has similarity to E. coli S17 and rat S11 ribosomal proteins
YBR048W	K.TAIEGSYIDKK.C	RPS11B	3.072	612.827	0.1	Protein component of the small (40S) ribosomal subunit; identical to Rps11Ap and has similarity to E. coli S17 and rat S11 ribosomal proteins
YBR078W	K.KLQSNGAIQGDSFVC@K.N	ECM33	4.159	584.63	1.09	GPI-anchored protein of unknown function, has a possible role in apical bud growth; GPI-anchoring on the plasma membrane crucial to function; phosphorylated in mitochondria; similar to Sps2p and Pst1p
YBR078W	K.LQSNGAIQGDSFVC@K.N	ECM33	5.211	812.394	0.87	GPI-anchored protein of unknown function, has a possible role in apical bud growth; GPI-anchoring on the plasma membrane crucial to function; phosphorylated in mitochondria; similar to Sps2p and Pst1p
YBR096W	K.DALEYC@GLYNEK.V	YBR096W	3.478	737.829	-0.62	Putative protein of unknown function; green fluorescent protein (GFP)-fusion protein localizes to the ER
YBR102C	R.ANINDLNEVLDQC@TK.I	EXO84	3.301	873.92	0.21	Essential protein with dual roles in spliceosome assembly and exocytosis; the exocyst complex (Sec3p, Sec5p, Sec6p, Sec8p, Sec10p, Sec15p, Exo70p, and Exo84p) mediates polarized targeting of secretory vesicles to active sites of exocytosis
YBR115C	R.YLPNGDC@EC@CGR[.A	LYS2	2.96	750.787	-0.13	Alpha aminoadipate reductase, catalyzes the reduction of alpha-aminoadipate to alpha-aminoadipate 6-semialdehyde, which is the fifth step in biosynthesis of lysine; activation requires posttranslational phosphopantetheinylation by Lys5p
YBR118W	K.F]VPSK#PMCVEAFSEYPPLGR.F	TEF2	3.33	790.053	-0.26	Translational elongation factor EF-1 alpha; also encoded by TEF1; functions in the binding reaction of aminoacyl-tRNA (AA-tRNA) to ribosomes
YBR118W	K.FVPSK#PMCVEAFSEYPPLGR.F	TEF2	3.466	776.378	0.08	Translational elongation factor EF-1 alpha; also encoded by TEF1; functions in the binding reaction of aminoacyl-tRNA (AA-tRNA) to ribosomes
YBR118W	K.FVPSKPMC@VEAFSEYPPLGR.F	TEF2	3.055	776.379	0.6	Translational elongation factor EF-1 alpha; also encoded by TEF1; functions in the binding reaction of aminoacyl-tRNA (AA-tRNA) to ribosomes
YBR118W	K.STTTGHLIYK.C	TEF2	2.817	560.803	-0.41	Translational elongation factor EF-1 alpha; also encoded by TEF1; functions in the binding reaction of aminoacyl-tRNA (AA-tRNA) to ribosomes
YBR118W	R.GNVC@GDAKNDPPK.G	TEF2	2.848	686.32	0.01	Translational elongation factor EF-1 alpha; also encoded by TEF1; functions in the binding reaction of aminoacyl-tRNA (AA-tRNA) to ribosomes
YBR118W	R.R]GNVCGDAKNDPPK.G	TEF2	2.042	509.916	0.1	Translational elongation factor EF-1 alpha; also encoded by TEF1; functions in the binding reaction of aminoacyl-tRNA (AA-tRNA) to ribosomes
YBR118W	R.RGNVC@GDAKNDPPK.G	TEF2	1.941	509.916	-0.12	Translational elongation factor EF-1 alpha; also encoded by TEF1; functions in the binding reaction of aminoacyl-tRNA (AA-tRNA) to ribosomes
YBR121C	K.FSDWMC@R.D	GRS1	2.558	509.2	0.61	Cytoplasmic and mitochondrial glycyl-tRNA synthase that ligates glycine to the cognate anticodon bearing tRNA; transcription termination factor that may interact with the 3'-end of pre-mRNA to promote 3'-end formation
YBR121C	K.TSYGWIE#CVGC@ADR.S	GRS1	4.295	837.356	-0.31	Cytoplasmic and mitochondrial glycyl-tRNA synthase that ligates glycine to the cognate anticodon bearing tRNA; transcription termination factor that may interact with the 3'-end of pre-mRNA to promote 3'-end formation
YBR127C	K.IPIFSASGLPHNEIAAQIC@R.Q	VMA2	2.884	732.053	0.13	Subunit B of the eight-subunit V1 peripheral membrane domain of the vacuolar H+-ATPase (V-ATPase), an electrogenic proton pump found throughout the endomembrane system; contains nucleotide binding sites; also detected in the cytoplasm
YBR127C	R.GQKIPIFSASGLPHNEIAAQICR[.Q	VMA2	2.882	627.585	0.18	Subunit B of the eight-subunit V1 peripheral membrane domain of the vacuolar H+-ATPase (V-ATPase), an electrogenic proton pump found throughout the endomembrane system; contains nucleotide binding sites; also detected in the cytoplasm
YBR130C	K.NSSAIEQSC@SEK.L	SHE3	2.541	670.293	0.12	Protein that acts as an adaptor between Myo4p and the She2p-mRNA complex; part of the mRNA localization machinery that restricts accumulation of certain proteins to the bud; also required for cortical ER inheritance
YBR139W	K.GGYHPVLSSEEC@EK.M	YBR139W	3.185	796.357	0.5	Putative serine type carboxypeptidase with a role in phytochelatin synthesis; green fluorescent protein (GFP)-fusion protein localizes to the vacuole; expression induced by nitrogen limitation in a GLN3, GAT1-independent manner
YBR151W	K.TLNC@AVSSLPK.D	APD1	3.659	595.316	-0.24	Protein of unknown function, required for normal localization of actin patches and for normal tolerance of sodium ions and hydrogen peroxide; localizes to both cytoplasm and nucleus
YBR162C	R.TLQYGDASC@SC@WK.T	TOS1	4.254	788.333	0.91	Covalently-bound cell wall protein of unknown function; identified as a cell cycle regulated SBF target gene; deletion mutants are highly resistant to treatment with beta-1,3-glucanase; has sequence similarity to YJL171C
YBR191W	K.C]RQEFLER.V	RPL21A	2.925	569.277	0.04	Protein component of the large (60S) ribosomal subunit, nearly identical to Rpl21Bp and has similarity to rat L21 ribosomal protein
YBR214W	K.LSAVPMTQTPSQC@LSC@VHAQK.W	SDS24	2.176	787.044	-0.91	One of two S. cerevisiae homologs (Sds23p and Sds24p) of the Schizosaccharomyces pombe Sds23 protein, which genetic studies have implicated in APC/cyclosome regulation; may play an indirect role in fluid-phase endocytosis
YBR218C	R.FGDIDEC@DVASYNMYPR.V	PYC2	4.72	1034.42	-0.61	Pyruvate carboxylase isoform, cytoplasmic enzyme that converts pyruvate to oxaloacetate; highly similar to isoform Pyc1p but differentially regulated; mutations in the human homolog are associated with lactic acidosis
YBR218C	R.LDGGNAYAGATISPHYDSMLVK.C	PYC2	3.11	766.035	0.13	Pyruvate carboxylase isoform, cytoplasmic enzyme that converts pyruvate to oxaloacetate; highly similar to isoform Pyc1p but differentially regulated; mutations in the human homolog are associated with lactic acidosis
YBR218C	R.TAFGNGTC@FVER.F	PYC2	3.26	679.811	-1.26	Pyruvate carboxylase isoform, cytoplasmic enzyme that converts pyruvate to oxaloacetate; highly similar to isoform Pyc1p but differentially regulated; mutations in the human homolog are associated with lactic acidosis
YBR221C	K.C@QMVFRGPNGAAVGVGAQHSQDFSPWYGSIPGLK.V	PDB1	4.92	909.436	-2.33	E1 beta subunit of the pyruvate dehydrogenase (PDH) complex, which is an evolutionarily-conserved multi-protein complex found in mitochondria
YBR230C	K.E]CAIEYLK.A	OM14	1.949	513.252	0.26	Integral mitochondrial outer membrane protein; abundance is decreased in cells grown in glucose relative to other carbon sources; appears to contain 3 alpha-helical transmembrane segments; ORF encodes a 97-basepair intron
YBR234C	K.SILAVTC@ETDC@LVYR.V	ARC40	5.32	900.437	-0.09	Subunit of the ARP2/3 complex, which is required for the motility and integrity of cortical actin patches
YBR234C	K.SILAVTCE#TDC@LVYR.V	ARC40	5.513	900.435	-2.24	Subunit of the ARP2/3 complex, which is required for the motility and integrity of cortical actin patches
YBR244W	K.C@GFTPQYK.E	GPX2	3.239	500.731	-0.21	Phospholipid hydroperoxide glutathione peroxidase induced by glucose starvation that protects cells from phospholipid hydroperoxides and nonphospholipid peroxides during oxidative stress
YBR263W	K.LC@NESSEVAALSGEISK.W	SHM1	5.351	897.432	-0.53	Mitochondrial serine hydroxymethyltransferase, converts serine to glycine plus 5,10 methylenetetrahydrofolate; involved in generating precursors for purine, pyrimidine, amino acid, and lipid biosynthesis; reverse reaction generates serine
YBR286W	K.LVEIPNLGC@EEK.D	APE3	2.793	700.858	0.07	Vacuolar aminopeptidase Y, processed to mature form by Prb1p
YCL009C	K.LVEPFGVLEC@AR.S	ILV6	2.838	695.364	0.63	Regulatory subunit of acetolactate synthase, which catalyzes the first step of branched-chain amino acid biosynthesis; enhances activity of the Ilv2p catalytic subunit, localizes to mitochondria
YCL009C	R.K]QHVLNCLVQNEPGVLSR.V	ILV6	4.456	697.709	-0.18	Regulatory subunit of acetolactate synthase, which catalyzes the first step of branched-chain amino acid biosynthesis; enhances activity of the Ilv2p catalytic subunit, localizes to mitochondria
YCL030C	K.FHAAQLPTETLEVETQPGVLC@SR.F	HIS4	4.487	861.768	0.86	Multifunctional enzyme containing phosphoribosyl-ATP pyrophosphatase, phosphoribosyl-AMP cyclohydrolase, and histidinol dehydrogenase activities; catalyzes the second, third, ninth and tenth steps in histidine biosynthesis
YCL030C	K.LVDNAGSVFVGAY#TPESCGDYSSGTNHTLPTYGYAR.Q	HIS4	3.886	1276.25	-0.2	Multifunctional enzyme containing phosphoribosyl-ATP pyrophosphatase, phosphoribosyl-AMP cyclohydrolase, and histidinol dehydrogenase activities; catalyzes the second, third, ninth and tenth steps in histidine biosynthesis
YCL033C	R.VEIC@C@AR.C	YCL033C	2.22	454.21	0.27	Putative protein-methionine-R-oxide reductase; involved in response to oxidative stress; similar to mouse Sepx1p and fly SelRp; YCL033C is not an essential gene
YCL050C	K.EWIC@VVPR.S	APA1	2.347	529.776	-0.37	Diadenosine 5',5''-P1,P4-tetraphosphate phosphorylase I (AP4A phosphorylase), involved in catabolism of bis(5'-nucleosidyl) tetraphosphates; has similarity to Apa2p
YCL050C	K.LLC@ALDNEESDKR.H	APA1	4.091	781.877	-0.74	Diadenosine 5',5''-P1,P4-tetraphosphate phosphorylase I (AP4A phosphorylase), involved in catabolism of bis(5'-nucleosidyl) tetraphosphates; has similarity to Apa2p
YCL064C	R.LSLPC@TVVVPTATK.K	CHA1	2.83	743.421	0.3	Catabolic L-serine (L-threonine) deaminase, catalyzes the degradation of both L-serine and L-threonine; required to use serine or threonine as the sole nitrogen source, transcriptionally induced by serine and threonine
YCR012W	K.DVTFLNDC@VGPEVEAAVK.A	PGK1	5.952	981.977	-0.11	3-phosphoglycerate kinase, catalyzes transfer of high-energy phosphoryl groups from the acyl phosphate of 1,3-bisphosphoglycerate to ADP to produce ATP; key enzyme in glycolysis and gluconeogenesis
YCR012W	K.ELQSLLGKDVTFLNDC@VGPEVEAAVK.A	PGK1	6.037	944.487	-0.71	3-phosphoglycerate kinase, catalyzes transfer of high-energy phosphoryl groups from the acyl phosphate of 1,3-bisphosphoglycerate to ADP to produce ATP; key enzyme in glycolysis and gluconeogenesis
YCR031C	K.ADRDESSPYAAMLAAQDVAAK.C	RPS14A	5.168	732.68	0.25	Ribosomal protein 59 of the small subunit, required for ribosome assembly and 20S pre-rRNA processing; mutations confer cryptopleurine resistance; nearly identical to Rps14Bp and similar to E. coli S11 and rat S14 ribosomal proteins
YCR031C	K.C@KEVGITAVHVK.I	RPS14A	2.201	335.939	0.3	Ribosomal protein 59 of the small subunit, required for ribosome assembly and 20S pre-rRNA processing; mutations confer cryptopleurine resistance; nearly identical to Rps14Bp and similar to E. coli S11 and rat S14 ribosomal proteins
YCR031C	K.VKADRDESSPYAAMLAAQDVAAK.C	RPS14A	4.038	606.552	-0.55	Ribosomal protein 59 of the small subunit, required for ribosome assembly and 20S pre-rRNA processing; mutations confer cryptopleurine resistance; nearly identical to Rps14Bp and similar to E. coli S11 and rat S14 ribosomal proteins
YCR084C	K.FSNDGEYLATGC@NK.T	TUP1	4.296	788.341	0.11	General repressor of transcription, forms complex with Cyc8p, involved in the establishment of repressive chromatin structure through interactions with histones H3 and H4, appears to enhance expression of some genes
YCR084C	K.SLDHTSVVC@C@VK.F	TUP1	4.038	702.834	-0.24	General repressor of transcription, forms complex with Cyc8p, involved in the establishment of repressive chromatin structure through interactions with histones H3 and H4, appears to enhance expression of some genes
YCR087C-A	K.NHTSC@ISEDEK.Y	YCR087C-A	2.627	660.28	-0.28	Putative protein of unknown function; green fluorescent protein (GFP)-fusion protein localizes to the nucleolus; YCR087C-A is not an essential gene
YDL014W	K.ANC@IDSTVDAETVFAR.E	NOP1	5.343	884.913	0.51	Nucleolar protein, component of the small subunit processome complex, which is required for processing of pre-18S rRNA; has similarity to mammalian fibrillarin
YDL022W	K.ELLNGQSAQGLITC@K.E	GPD1	4.502	816.425	0.64	NAD-dependent glycerol-3-phosphate dehydrogenase, key enzyme of glycerol synthesis, essential for growth under osmotic stress; expression regulated by high-osmolarity glycerol response pathway; homolog of Gpd2p
YDL022W	R.LMATSGKDAWEC@EK.E	GPD1	3.776	821.366	-0.08	NAD-dependent glycerol-3-phosphate dehydrogenase, key enzyme of glycerol synthesis, essential for growth under osmotic stress; expression regulated by high-osmolarity glycerol response pathway; homolog of Gpd2p
YDL055C	K.STIVGWNSTVGQWC@R.L	PSA1	5.492	875.92	0.09	GDP-mannose pyrophosphorylase (mannose-1-phosphate guanyltransferase), synthesizes GDP-mannose from GTP and mannose-1-phosphate in cell wall biosynthesis; required for normal cell wall structure
YDL061C	R.KYDLNIC@R.Q	RPS29B	2.549	541.276	-0.37	Protein component of the small (40S) ribosomal subunit; nearly identical to Rps29Ap and has similarity to rat S29 and E. coli S14 ribosomal proteins
YDL061C	R.QC@RVC@SSHTGLVR.K	RPS29B	2.481	390.694	0.12	Protein component of the small (40S) ribosomal subunit; nearly identical to Rps29Ap and has similarity to rat S29 and E. coli S14 ribosomal proteins
YDL061C	R.VC@SSHTGLVR.K	RPS29B	3.004	558.285	-0.5	Protein component of the small (40S) ribosomal subunit; nearly identical to Rps29Ap and has similarity to rat S29 and E. coli S14 ribosomal proteins
YDL066W	K.C@ATITPDEAR.V	IDP1	2.776	567.267	0.76	Mitochondrial NADP-specific isocitrate dehydrogenase, catalyzes the oxidation of isocitrate to alpha-ketoglutarate; not required for mitochondrial respiration and may function to divert alpha-ketoglutarate to biosynthetic processes
YDL066W	K.DLALAC@GNNER.S	IDP1	3.72	616.788	0.24	Mitochondrial NADP-specific isocitrate dehydrogenase, catalyzes the oxidation of isocitrate to alpha-ketoglutarate; not required for mitochondrial respiration and may function to divert alpha-ketoglutarate to biosynthetic processes
YDL084W	R.IC@VSTDVFGR.G	SUB2	2.843	577.287	0.31	Component of the TREX complex required for nuclear mRNA export; member of the DEAD-box RNA helicase superfamily and is involved in early and late steps of spliceosome assembly; homolog of the human splicing factor hUAP56
YDL086W	R.VTC@ATC@FFPTDIHSR.T	YDL086W	3.674	604.612	0.01	Putative protein of unknown function; the authentic, non-tagged protein is detected in highly purified mitochondria in high-throughput studies; YDL086W is not an essential gene
YDL088C	R.IFHNHDTGC@DENDSTVNK.S	ASM4	3.445	701.633	0.69	Nuclear pore complex subunit, part of a subcomplex also containing Nup53p, Nup170p, and Pse1p
YDL100C	K.MPLC@AGEIR.G	GET3	2.748	523.76	-0.18	Guanine nucleotide exchange factor for Gpa1p; amplifies G protein signaling; subunit of the GET complex, which is involved in Golgi to ER trafficking; has low-level ATPase activity and is involved in resistance to heat and metal stress
YDL136W	K.SIAC@VLTVINEQQR.E	RPL35B	5.055	544.291	-0.03	Protein component of the large (60S) ribosomal subunit, identical to Rpl35Ap and has similarity to rat L35 ribosomal protein
YDL140C	K.MVC@ETDVPSEDDPTQLVSR.G	RPO21	4.809	1097.49	2.17	RNA polymerase II largest subunit B220, part of central core; phosphorylation of C-terminal heptapeptide repeat domain regulates association with transcription and splicing factors; similar to bacterial beta-prime
YDL145C	K.AWEVDTC@R.G	COP1	2.673	518.73	0.26	Alpha subunit of COPI vesicle coatomer complex, which surrounds transport vesicles in the early secretory pathway
YDL145C	K.YFTNIYEGC@R.T	COP1	2.814	661.796	0.41	Alpha subunit of COPI vesicle coatomer complex, which surrounds transport vesicles in the early secretory pathway
YDL145C	R.TYIPSTPC@ELPAQLGYVR.A	COP1	2.49	1033.02	-0.1	Alpha subunit of COPI vesicle coatomer complex, which surrounds transport vesicles in the early secretory pathway
YDL168W	K.EINQAFEDLHNGDC@LR.T	SFA1	3.105	965.939	-0.3	Bifunctional enzyme containing both alcohol dehydrogenase and glutathione-dependent formaldehyde dehydrogenase activities, functions in formaldehyde detoxification and formation of long chain and complex alcohols, regulated by Hog1p-Sko1p
YDL171C	K.VIVVGGGDTGNDC@LGTSVR.H	GLT1	5.363	938.465	0.39	NAD(+)-dependent glutamate synthase (GOGAT), synthesizes glutamate from glutamine and alpha-ketoglutarate; with Gln1p, forms the secondary pathway for glutamate biosynthesis from ammonia; expression regulated by nitrogen source
YDL178W	K.IRDFDPVSGILK.C	DLD2	2.487	453.926	-0.2	D-lactate dehydrogenase, located in the mitochondrial matrix
YDL185W	K.FTC@NATHELVVR.T	TFP1	4.571	723.861	-0.41	Vacuolar ATPase V1 domain subunit A containing the catalytic nucleotide binding sites; protein precursor undergoes self-catalyzed splicing to yield the extein Tfp1p and the intein Vde (PI-SceI), which is a site-specific endonuclease
YDL185W	K.LNLC@AEYK.D	TFP1	2.977	505.753	0.98	Vacuolar ATPase V1 domain subunit A containing the catalytic nucleotide binding sites; protein precursor undergoes self-catalyzed splicing to yield the extein Tfp1p and the intein Vde (PI-SceI), which is a site-specific endonuclease
YDL195W	R.GNWC@FK.T	SEC31	1.886	406.181	-0.08	Essential phosphoprotein component (p150) of the COPII coat of secretory pathway vesicles, in complex with Sec13p; required for ER-derived transport vesicle formation
YDL226C	K.C@MDC@GAPNPQWATPK.F	GCS1	5.337	874.862	-0.88	ADP-ribosylation factor GTPase activating protein (ARF GAP), involved in ER-Golgi transport; shares functional similarity with Glo3p
YDL226C	K.C]MDC@GAPNPQWATPK.F	GCS1	4.897	866.866	0.34	ADP-ribosylation factor GTPase activating protein (ARF GAP), involved in ER-Golgi transport; shares functional similarity with Glo3p
YDL229W	R.R]TFTTCADNQTTVQFPVYQGER.V	SSB1	4.81	873.746	-0.98	Cytoplasmic ATPase that is a ribosome-associated molecular chaperone, functions with J-protein partner Zuo1p; may be involved in folding of newly-made polypeptide chains; member of the HSP70 family; interacts with phosphatase subunit Reg1p
YDL229W	R.TFTTC@ADNQTTVQFPVYQGER.V	SSB1	4.705	821.712	-0.76	Cytoplasmic ATPase that is a ribosome-associated molecular chaperone, functions with J-protein partner Zuo1p; may be involved in folding of newly-made polypeptide chains; member of the HSP70 family; interacts with phosphatase subunit Reg1p
YDL229W	R.TFTTCAD#NQTTVQFPVYQGER.V	SSB1	4.747	821.713	0.01	Cytoplasmic ATPase that is a ribosome-associated molecular chaperone, functions with J-protein partner Zuo1p; may be involved in folding of newly-made polypeptide chains; member of the HSP70 family; interacts with phosphatase subunit Reg1p
YDR002W	K.I]CANHIIAPEYTLKPNVGSDR.S	YRB1	2.672	592.808	0.37	Ran GTPase binding protein; involved in nuclear protein import and RNA export, ubiquitin-mediated protein degradation during the cell cycle; shuttles between the nucleus and cytoplasm; is essential; homolog of human RanBP1
YDR023W	K.ELVSC@SNC@TDYQSR.N	SES1	4.687	859.859	-0.15	Cytosolic seryl-tRNA synthetase, class II aminoacyl-tRNA synthetase that aminoacylates tRNA(Ser), displays tRNA-dependent amino acid recognition which enhances discrimination of the serine substrate, interacts with peroxin Pex21p
YDR023W	K.KYVHC@LNSTLAATQR.A	SES1	4.829	587.974	0.08	Cytosolic seryl-tRNA synthetase, class II aminoacyl-tRNA synthetase that aminoacylates tRNA(Ser), displays tRNA-dependent amino acid recognition which enhances discrimination of the serine substrate, interacts with peroxin Pex21p
YDR023W	K.YVHC@LNSTLAATQR.A	SES1	4.053	817.409	0.09	Cytosolic seryl-tRNA synthetase, class II aminoacyl-tRNA synthetase that aminoacylates tRNA(Ser), displays tRNA-dependent amino acid recognition which enhances discrimination of the serine substrate, interacts with peroxin Pex21p
YDR023W	R.ALC@C@ILENYQTEDGLVVPEVLRK.Y	SES1	3.446	907.13	-1.54	Cytosolic seryl-tRNA synthetase, class II aminoacyl-tRNA synthetase that aminoacylates tRNA(Ser), displays tRNA-dependent amino acid recognition which enhances discrimination of the serine substrate, interacts with peroxin Pex21p
YDR037W	K.EIC@NAYTELNDPFDQR.A	KRS1	5.159	992.938	-0.69	Lysyl-tRNA synthetase; also identified as a negative regulator of general control of amino acid biosynthesis
YDR037W	K.ILVDNKLEC@PPPLTNAR.M	KRS1	4.644	975.528	0.31	Lysyl-tRNA synthetase; also identified as a negative regulator of general control of amino acid biosynthesis
YDR051C	R.GLNNTGGVYENNEDNICEGK#PGK.C	YDR051C	3.534	827.044	0.54	Protein of unknown function; interacts with Hsp82p in two-hybrid assay; deletion confers sensitivity to Nickel
YDR074W	R.IINC@VTQLPYK.I	TPS2	3.791	674.868	-0.6	Phosphatase subunit of the trehalose-6-phosphate synthase/phosphatase complex, which synthesizes the storage carbohydrate trehalose; expression is induced by stress conditions and repressed by the Ras-cAMP pathway
YDR091C	R.APESLLTGC@NR.F	RLI1	3.067	609.301	0.45	Essential iron-sulfur protein required for ribosome biogenesis and translation initiation; facilitates binding of a multifactor complex (MFC) of translation initiation factors to the small ribosomal subunit; predicted ABC family ATPase
YDR120C	K.YSVAQGPPVDTK.C	TRM1	3.501	631.325	-0.1	tRNA methyltransferase, localizes to both the nucleus and mitochondrion to produce the modified base N2,N2-dimethylguanosine in tRNAs in both compartments
YDR127W	K.CY#GDSAQFVSDEDLR.F	ARO1	5.607	881.372	-0.69	Pentafunctional arom protein, catalyzes steps 2 through 6 in the biosynthesis of chorismate, which is a precursor to aromatic amino acids
YDR141C	K.DLVTPEPGLLIR.C	DOP1	2.893	661.888	0.92	Protein of unknown function, essential for viability, involved in establishing cellular polarity and morphogenesis; the authentic, non-tagged protein is detected in highly purified mitochondria in high-throughput studies
YDR158W	K.EYVC@DAYK.L	HOM2	1.814	524.226	0.41	Aspartic beta semi-aldehyde dehydrogenase, catalyzes the second step in the common pathway for methionine and threonine biosynthesis; expression regulated by Gcn4p and the general control of amino acid synthesis
YDR158W	K.LLTPEEIKVSAQC@NR.V	HOM2	3.062	879.463	-1.22	Aspartic beta semi-aldehyde dehydrogenase, catalyzes the second step in the common pathway for methionine and threonine biosynthesis; expression regulated by Gcn4p and the general control of amino acid synthesis
YDR158W	R.VAVSDGHTEC@ISLR.F	HOM2	4.628	772.38	-0.36	Aspartic beta semi-aldehyde dehydrogenase, catalyzes the second step in the common pathway for methionine and threonine biosynthesis; expression regulated by Gcn4p and the general control of amino acid synthesis
YDR172W	K.ERYDQC@VSNVSNFLR.A	SUP35	4.786	629.632	0.18	Translation termination factor eRF3; altered protein conformation creates the [PSI(+)] prion, a dominant cytoplasmically inherited protein aggregate that alters translational fidelity and creates a nonsense suppressor phenotype
YDR172W	R.YDQC@VSNVSNFLR.A	SUP35	3.595	801.373	0.09	Translation termination factor eRF3; altered protein conformation creates the [PSI(+)] prion, a dominant cytoplasmically inherited protein aggregate that alters translational fidelity and creates a nonsense suppressor phenotype
YDR221W	K.YFYCDNK.G	GTB1	2.229	476.697	-0.13	Glucosidase II beta subunit, forms a complex with alpha subunit Rot2p, involved in removal of two glucose residues from N-linked glycans during glycoprotein biogenesis in the ER
YDR226W	K.DELTNNPAC@K.N	ADK1	2.981	581.264	-0.1	Adenylate kinase, required for purine metabolism; localized to the cytoplasm and the mitochondria; lacks cleavable signal sequence
YDR233C	K.SC@NC@DLLLWR.N	RTN1	3.666	668.81	-0.69	ER membrane protein that interacts with exocyst subunit Sec6p and with Yip3p; also interacts with Sbh1p; null mutant has an altered (mostly cisternal) ER morphology; member of the RTNLA (reticulon-like A) subfamily
YDR233C	K.TQEFSQMAC@EK.T	RTN1	3.879	687.787	-0.23	ER membrane protein that interacts with exocyst subunit Sec6p and with Yip3p; also interacts with Sbh1p; null mutant has an altered (mostly cisternal) ER morphology; member of the RTNLA (reticulon-like A) subfamily
YDR234W	R.LSDLQSAADVVC@PTGDLNK.V	LYS4	5.284	1001.99	-0.67	Homoaconitase, catalyzes the conversion of homocitrate to homoisocitrate, which is a step in the lysine biosynthesis pathway
YDR238C	K.GTNMGILTPSESLGEDDC@RFLSC@NLYAK.S	SEC26	2.695	1055.48	-0.88	Essential beta-coat protein of the COPI coatomer, involved in ER-to-Golgi protein trafficking and maintenance of normal ER morphology; shares 43% sequence identity with mammalian beta-coat protein (beta-COP)
YDR321W	K.SQNAAVNGSGIAC@QQR.S	ASP1	5.081	830.894	-0.21	Cytosolic L-asparaginase, involved in asparagine catabolism
YDR346C	K.I]CAVVEGPLNNLVER.I	SVF1	3.65	841.949	1.07	Protein with a potential role in cell survival pathways, required for the diauxic growth shift; expression in mammalian cells increases survival under conditions inducing apoptosis
YDR353W	K.GISAC@AVC@DGAVPIFR.N	TRR1	4.313	846.913	-0.06	Cytoplasmic thioredoxin reductase, key regulatory enzyme that determines the redox state of the thioredoxin system, which acts as a disulfide reductase system and protects cells against both oxidative and reductive stress
YDR353W	R.QAITSAGSGC@MAALDAEK.Y	TRR1	5.747	898.911	-0.09	Cytoplasmic thioredoxin reductase, key regulatory enzyme that determines the redox state of the thioredoxin system, which acts as a disulfide reductase system and protects cells against both oxidative and reductive stress
YDR385W	K.IQEPVFLVEIQC@PEQAVGGIYSVLNK.K	EFT2	5.425	977.514	-1.68	Elongation factor 2 (EF-2), also encoded by EFT1; catalyzes ribosomal translocation during protein synthesis; contains diphthamide, the unique posttranslationally modified histidine residue specifically ADP-ribosylated by diphtheria toxin
YDR385W	K.IWC@FGPDGNGPNLVIDQTK.A	EFT2	6.198	1066.02	-1.79	Elongation factor 2 (EF-2), also encoded by EFT1; catalyzes ribosomal translocation during protein synthesis; contains diphthamide, the unique posttranslationally modified histidine residue specifically ADP-ribosylated by diphtheria toxin
YDR385W	R.AEQLYEGPADDANC@IAIK.N	EFT2	6.598	989.465	0.1	Elongation factor 2 (EF-2), also encoded by EFT1; catalyzes ribosomal translocation during protein synthesis; contains diphthamide, the unique posttranslationally modified histidine residue specifically ADP-ribosylated by diphtheria toxin
YDR385W	R.F]VEPIDDCPAGNIIGLVGIDQFLLK.T	EFT2	5.118	915.15	-0.26	Elongation factor 2 (EF-2), also encoded by EFT1; catalyzes ribosomal translocation during protein synthesis; contains diphthamide, the unique posttranslationally modified histidine residue specifically ADP-ribosylated by diphtheria toxin
YDR385W	R.KIWC@FGPDGNGPNLVIDQTK.A	EFT2	4.163	753.713	0.48	Elongation factor 2 (EF-2), also encoded by EFT1; catalyzes ribosomal translocation during protein synthesis; contains diphthamide, the unique posttranslationally modified histidine residue specifically ADP-ribosylated by diphtheria toxin
YDR388W	K.IVTPC@QELLK.I	RVS167	2.29	600.837	0.08	Actin-associated protein, subunit of a complex (Rvs161p-Rvs167p) involved in regulation of actin cytoskeleton, endocytosis, and viability following starvation or osmotic stress; homolog of mammalian amphiphysin
YDR399W	K.QYISYNNVHQLC@QVSAER.I	HPT1	4.001	737.02	-0.11	Dimeric hypoxanthine-guanine phosphoribosyltransferase, catalyzes the formation of both inosine monophosphate and guanosine monophosphate; mutations in the human homolog HPRT1 can cause Lesch-Nyhan syndrome and Kelley-Seegmiller syndrome
YDR418W	K.EILGTAQSVGC@R.V	RPL12B	3.867	645.827	-0.02	Protein component of the large (60S) ribosomal subunit, nearly identical to Rpl12Ap; rpl12a rpl12b double mutant exhibits slow growth and slow translation; has similarity to E. coli L11 and rat L12 ribosomal proteins
YDR432W	K.NLPEGC@SWQDLK.D	NPL3	3.345	723.838	-0.1	RNA-binding protein that carries poly(A)+ mRNA from the nucleus into the cytoplasm; dissociation from mRNAs is promoted by Mtr10p; phosphorylated by Sky1p in the cytoplasm
YDR447C	K.RLCD#EIATIQSK.R	RPS17B	2.697	478.586	0.54	Ribosomal protein 51 (rp51) of the small (40s) subunit; nearly identical to Rps17Ap and has similarity to rat S17 ribosomal protein
YDR450W	R.YSNLVC@K.K	RPS18A	2.847	442.221	0.06	Protein component of the small (40S) ribosomal subunit; nearly identical to Rps18Bp and has similarity to E. coli S13 and rat S18 ribosomal proteins
YDR454C	K.TC@ILDIDMQGVK.S	GUK1	3.446	704.844	0.16	Guanylate kinase, converts GMP to GDP; required for growth and mannose outer chain elongation of cell wall N-linked glycoproteins
YDR487C	K.SFLKPGHIC@PLR.A	RIB3	2.815	475.599	0.27	3,4-dihydroxy-2-butanone-4-phosphate synthase (DHBP synthase), required for riboflavin biosynthesis from ribulose-5-phosphate, also has an unrelated function in mitochondrial respiration
YDR500C	K.KTC@SSC@GYPSAK.T	RPL37B	2.199	673.297	0.05	Protein component of the large (60S) ribosomal subunit, has similarity to Rpl37Ap and to rat L37 ribosomal protein
YDR500C	K.TC@SSC@GYPSAK.T	RPL37B	3.73	609.25	-0.04	Protein component of the large (60S) ribosomal subunit, has similarity to Rpl37Ap and to rat L37 ribosomal protein
YDR508C	R.ILMSLAKQGNAPKCFDYID#R[.E	GNP1	1.829	480.248	1.38	High-affinity glutamine permease, also transports Leu, Ser, Thr, Cys, Met and Asn; expression is fully dependent on Grr1p and modulated by the Ssy1p-Ptr3p-Ssy5p (SPS) sensor of extracellular amino acids
YDR519W	K.GWDQGVAGMC@VGEK.R	FPR2	4.432	755.326	-1.09	Membrane-bound peptidyl-prolyl cis-trans isomerase (PPIase), binds to the drugs FK506 and rapamycin; expression pattern suggests possible involvement in ER protein trafficking
YEL002C	K.FFENEGNILC@MSSPGAVPNTIR.L	WBP1	3.761	823.722	-0.73	Beta subunit of the oligosaccharyl transferase (OST) glycoprotein complex; required for N-linked glycosylation of proteins in the endoplasmic reticulum
YEL026W	R.A]CGVSRPVIAASITTNDASAIK.T	SNU13	2.973	734.724	1.21	RNA binding protein, part of U3 snoRNP involved in rRNA processing, part of U4/U6-U5 tri-snRNP involved in mRNA splicing, similar to human 15.5K protein
YEL031W	K.DMGYQTLMC@GDGTNDVGALK.Q	SPF1	5.217	1089.46	1.51	P-type ATPase, ion transporter of the ER membrane involved in ER function and Ca2+ homeostasis; required for regulating Hmg2p degradation; confers sensitivity to a killer toxin (SMKT) produced by Pichia farinosa KK1
YEL037C	K.LAQSISCE#ESQIK.L	RAD23	3.966	746.869	-0.48	Protein with ubiquitin-like N terminus, recognizes and binds damaged DNA (with Rad4p) during nucleotide excision repair; regulates Rad4p levels, subunit of Nuclear Excision Repair Factor 2 (NEF2); homolog of human HR23A and HR23B proteins
YEL047C	K.ASSGINGAC@TETQR.H	YEL047C	4.043	726.331	-0.41	Soluble fumarate reductase, required with isoenzyme Osm1p for anaerobic growth; may interact with ribosomes, based on co-purification experiments; authentic, non-tagged protein is detected in purified mitochondria in high-throughput studies
YEL071W	K.SVPTAC@NSYGGMYK.Y	DLD3	3.526	775.834	-0.73	D-lactate dehydrogenase, part of the retrograde regulon which consists of genes whose expression is stimulated by damage to mitochondria and reduced in cells grown with glutamate as the sole nitrogen source, located in the cytoplasm
YER023W	K.H#QVCTPGGTTIAGLC@VMEEK.G	PRO3	5.434	735.343	0.25	Delta 1-pyrroline-5-carboxylate reductase, catalyzes the last step in proline biosynthesis
YER023W	K.HQVC@TPGGTTIAGLC@VMEEK.G	PRO3	5.417	735.343	-0.07	Delta 1-pyrroline-5-carboxylate reductase, catalyzes the last step in proline biosynthesis
YER025W	K.C@QEPTC@PEPDC@YR.S	GCD11	4.097	856.329	-0.37	Gamma subunit of the translation initiation factor eIF2, involved in the identification of the start codon; binds GTP when forming the ternary complex with GTP and tRNAi-Met
YER025W	R.LQLTSPAC@TEINEK.I	GCD11	4.178	802.403	-0.75	Gamma subunit of the translation initiation factor eIF2, involved in the identification of the start codon; binds GTP when forming the ternary complex with GTP and tRNAi-Met
YER043C	K.FDNLYGC@R.E	SAH1	2.667	522.731	-1.34	S-adenosyl-L-homocysteine hydrolase, catabolizes S-adenosyl-L-homocysteine which is formed after donation of the activated methyl group of S-adenosyl-L-methionine (AdoMet) to an acceptor
YER043C	K.SKFDNLYGC@R.E	SAH1	3.315	630.295	-0.06	S-adenosyl-L-homocysteine hydrolase, catabolizes S-adenosyl-L-homocysteine which is formed after donation of the activated methyl group of S-adenosyl-L-methionine (AdoMet) to an acceptor
YER052C	K.HYSKPDGPNNNVAVVC@SAR.S	HOM3	3.507	695.669	0.24	Aspartate kinase (L-aspartate 4-P-transferase); cytoplasmic enzyme that catalyzes the first step in the common pathway for methionine and threonine biosynthesis; expression regulated by Gcn4p and the general control of amino acid synthesis
YER056C-A	K.C]GDC@GSALQGISTLRPR.Q	RPL34A	2.885	616.633	0.21	Protein component of the large (60S) ribosomal subunit, nearly identical to Rpl34Bp and has similarity to rat L34 ribosomal protein
YER062C	K.GC@DIIVK.N	HOR2	2.686	402.718	0.13	One of two redundant DL-glycerol-3-phosphatases (RHR2/GPP1 encodes the other) involved in glycerol biosynthesis; induced in response to hyperosmotic stress and oxidative stress, and during the diauxic transition
YER062C	K.LC@NALNALPK.E	HOR2	3.217	557.308	0.4	One of two redundant DL-glycerol-3-phosphatases (RHR2/GPP1 encodes the other) involved in glycerol biosynthesis; induced in response to hyperosmotic stress and oxidative stress, and during the diauxic transition
YER080W	K.IGPSVER.C	YER080W	1.962	379.214	-0.4	Putative protein of unknown function; the authentic, non-tagged protein is detected in highly purified mitochondria in high-throughput studies; null mutant displays decreased frequency of mitochondrial genome loss (petite formation)
YER086W	K.IPATIVMPVC@TPSIK.Y	ILV1	3.905	821.949	0.02	Threonine deaminase, catalyzes the first step in isoleucine biosynthesis; expression is under general amino acid control; ILV1 locus exhibits highly positioned nucleosomes whose organization is independent of known ILV1 regulation
YER088C	R.C@TITSDTSSSAATMNR.T	DOT6	4.537	851.872	0.21	Protein of unknown function, involved in telomeric gene silencing and filamentation
YER089C	K.SQNLLVC@GNAGDSR.T	PTC2	3.93	745.855	0.6	Type 2C protein phosphatase; dephosphorylates Hog1p to limit maximal osmostress induced kinase activity; dephosphorylates Ire1p to downregulate the unfolded protein response; dephosphorylates Cdc28p; role in DNA checkpoint inactivation
YER090W	R.IC@DPLTTSVDK.L	TRP2	3.048	624.811	0.3	Anthranilate synthase, catalyzes the initial step of tryptophan biosynthesis, forms multifunctional hetero-oligomeric anthranilate synthase:indole-3-glycerol phosphate synthase enzyme complex with Trp3p
YER091C	K.FWVNPDC@GLK.T	MET6	2.824	618.298	0.25	Cobalamin-independent methionine synthase, involved in amino acid biosynthesis; requires a minimum of two glutamates on the methyltetrahydrofolate substrate, similar to bacterial metE homologs
YER091C	K.GMLTGPITC@LR.W	MET6	3.372	617.818	0.56	Cobalamin-independent methionine synthase, involved in amino acid biosynthesis; requires a minimum of two glutamates on the methyltetrahydrofolate substrate, similar to bacterial metE homologs
YER091C	K.TQIHSHFC@YSDLDPNHIK.A	MET6	5.492	738.012	-0.73	Cobalamin-independent methionine synthase, involved in amino acid biosynthesis; requires a minimum of two glutamates on the methyltetrahydrofolate substrate, similar to bacterial metE homologs
YER131W	K.LHYC@VSC@AIHAR.I	RPS26B	3.867	496.239	-0.7	Protein component of the small (40S) ribosomal subunit; nearly identical to Rps26Ap and has similarity to rat S26 ribosomal protein
YER136W	K.APLVIADPTYFPEK.C	GDI1	4.551	780.919	-0.13	GDP dissociation inhibitor, regulates vesicle traffic in secretory pathways by regulating the dissociation of GDP from the Sec4/Ypt/rab family of GTP binding proteins
YER151C	K.SFQHC@ATADAVKPDEFYK.T	UBP3	4.18	705.327	1.11	Ubiquitin-specific protease that interacts with Bre5p to co-regulate anterograde and retrograde transport between endoplasmic reticulum and Golgi compartments; inhibitor of gene silencing; cleaves ubiquitin fusions but not polyubiquitin
YER165W	K.GFGFVC@FSTPEEATK.A	PAB1	5.372	838.885	-0.11	Poly(A) binding protein, part of the 3'-end RNA-processing complex, mediates interactions between the 5' cap structure and the 3' mRNA poly(A) tail, involved in control of poly(A) tail length, interacts with translation factor eIF-4G
YFL018C	K.LGGTC@LNVGC@IPSK.A	LPD1	3.729	738.371	-0.12	Dihydrolipoamide dehydrogenase, the lipoamide dehydrogenase component (E3) of the pyruvate dehydrogenase and 2-oxoglutarate dehydrogenase multi-enzyme complexes
YFL037W	R.EAE#GCDSLQGFQITHSLGGGTGSGMGTLLISK.I	TUB2	4.366	1075.51	-0.3	Beta-tubulin; associates with alpha-tubulin (Tub1p and Tub3p) to form tubulin dimer, which polymerizes to form microtubules
YFL037W	R.EAEGC@DSLQGFQITHSLGGGTGSGMGTLLISK.I	TUB2	4.769	1075.51	-0.49	Beta-tubulin; associates with alpha-tubulin (Tub1p and Tub3p) to form tubulin dimer, which polymerizes to form microtubules
YFL039C	K.L]CYVALDFEQEMQTAAQSSSIEK.S	ACT1	3.622	888.744	0.41	Actin, structural protein involved in cell polarization, endocytosis, and other cytoskeletal functions
YFL039C	K.QEYDESGPSIVHHK.C	ACT1	3.65	813.38	-1.17	Actin, structural protein involved in cell polarization, endocytosis, and other cytoskeletal functions
YFL039C	R.FRAPEALFHPSVLGLESAGIDQTTYNSIMK.C	ACT1	3.12	827.921	0.23	Actin, structural protein involved in cell polarization, endocytosis, and other cytoskeletal functions
YFL045C	K.C@C@IGFVGGSDLSK.Q	SEC53	4.09	700.321	0.53	Phosphomannomutase, involved in synthesis of GDP-mannose and dolichol-phosphate-mannose; required for folding and glycosylation of secretory proteins in the ER lumen
YFL045C	K.TYC@LQHVEK.D	SEC53	2.703	589.287	0.16	Phosphomannomutase, involved in synthesis of GDP-mannose and dolichol-phosphate-mannose; required for folding and glycosylation of secretory proteins in the ER lumen
YFL045C	R.NKC@C@IGFVGGSDLSK.Q	SEC53	5.366	821.388	-1.66	Phosphomannomutase, involved in synthesis of GDP-mannose and dolichol-phosphate-mannose; required for folding and glycosylation of secretory proteins in the ER lumen
YFL048C	K.IYDQSFASC@LMGYQDSSVPSTIR.V	EMP47	4.492	881.067	-1.46	Integral membrane component of endoplasmic reticulum-derived COPII-coated vesicles, which function in ER to Golgi transport
YFR006W	R.QYTSDITR.C	YFR006W	2.032	492.243	-0.38	Putative X-Pro aminopeptidase; green fluorescent protein (GFP)-fusion protein localizes to the cytoplasm; YFR006W is not an essential gene
YFR053C	K.LADDIPSNSPMAINC@EYGSFDNEHLVLPR.T	HXK1	4.505	1097.51	-0.17	Hexokinase isoenzyme 1, a cytosolic protein that catalyzes phosphorylation of glucose during glucose metabolism; expression is highest during growth on non-glucose carbon sources; glucose-induced repression involves the hexokinase Hxk2p
YFR053C	R.LAVC@GIAAIC@QK.R	HXK1	3.798	652.347	0.48	Hexokinase isoenzyme 1, a cytosolic protein that catalyzes phosphorylation of glucose during glucose metabolism; expression is highest during growth on non-glucose carbon sources; glucose-induced repression involves the hexokinase Hxk2p
YGL006W	K.NLSFLDK.C	PMC1	1.965	418.729	0.14	Vacuolar Ca2+ ATPase involved in depleting cytosol of Ca2+ ions; prevents growth inhibition by activation of calcineurin in the presence of elevated concentrations of calcium; similar to mammalian PMCA1a
YGL008C	K.KVTAVVESPEGE#RIVCVK.G	PMA1	3.505	667.366	-0.58	Plasma membrane H+-ATPase, pumps protons out of the cell; major regulator of cytoplasmic pH and plasma membrane potential; part of the P2 subgroup of cation-transporting ATPases
YGL008C	K.LSLHEPYTVEGVSPDDLMLTAC@LAASR.K	PMA1	2.657	987.816	-0.37	Plasma membrane H+-ATPase, pumps protons out of the cell; major regulator of cytoplasmic pH and plasma membrane potential; part of the P2 subgroup of cation-transporting ATPases
YGL009C	K.VFIGSC@TNGR.I	LEU1	2.354	555.772	-0.1	Isopropylmalate isomerase, catalyzes the second step in the leucine biosynthesis pathway
YGL009C	R.EAEILVVTGDNFGC@GSSR.E	LEU1	4.571	955.949	-0.42	Isopropylmalate isomerase, catalyzes the second step in the leucine biosynthesis pathway
YGL009C	R.EAGC@SIC@LGMNPDILDAYER.C	LEU1	4.519	1150.5	-1.03	Isopropylmalate isomerase, catalyzes the second step in the leucine biosynthesis pathway
YGL009C	R.RVDC@TLATVDHNIPTESRK.N	LEU1	3.323	738.043	0.25	Isopropylmalate isomerase, catalyzes the second step in the leucine biosynthesis pathway
YGL011C	R.GKDC@TVVISQK.K	SCL1	3.736	617.826	-0.64	Alpha 1 subunit of the 20S core complex of the 26S proteasome involved in the degradation of ubiquitinated substrates; essential for growth; detected in the mitochondria
YGL026C	K.IVTLC@GDAPEGK.R	TRP5	4.058	630.319	0.06	Tryptophan synthase involved in tryptophan biosynthesis, regulated by the general control system of amino acid biosynthesis
YGL028C	K.AIAYSPY#NDDGSCK.S	SCW11	3.007	780.835	-0.1	Cell wall protein with similarity to glucanases; may play a role in conjugation during mating based on its regulation by Ste12p
YGL043W	K.VNNC@DTNEAAYK.A	DST1	3.295	699.801	-0.39	General transcription elongation factor TFIIS, enables RNA polymerase II to read through blocks to elongation by stimulating cleavage of nascent transcripts stalled at transcription arrest sites
YGL043W	R.SADEPLTTFC@TC@EAC@GNR.W	DST1	4.985	1044.92	-0.42	General transcription elongation factor TFIIS, enables RNA polymerase II to read through blocks to elongation by stimulating cleavage of nascent transcripts stalled at transcription arrest sites
YGL135W	K.L]PNCPRPNMSIC@IFGDAFDVDRAK.S	RPL1B	4.03	937.111	-0.7	N-terminally acetylated protein component of the large (60S) ribosomal subunit, nearly identical to Rpl1Ap and has similarity to E. coli L1 and rat L10a ribosomal proteins; rpl1a rpl1b double null mutation is lethal
YGL135W	K.S]CGVDAMSVDDLK.K	RPL1B	4.078	698.808	-0.27	N-terminally acetylated protein component of the large (60S) ribosomal subunit, nearly identical to Rpl1Ap and has similarity to E. coli L1 and rat L10a ribosomal proteins; rpl1a rpl1b double null mutation is lethal
YGL135W	K.SC@GVDAMSVDDLKK.L	RPL1B	4.972	770.853	0.04	N-terminally acetylated protein component of the large (60S) ribosomal subunit, nearly identical to Rpl1Ap and has similarity to E. coli L1 and rat L10a ribosomal proteins; rpl1a rpl1b double null mutation is lethal
YGL148W	R.C]PDASVAGLMVK.E	ARO2	3.137	632.308	1.2	Bifunctional chorismate synthase and flavin reductase, catalyzes the conversion of 5-enolpyruvylshikimate 3-phosphate (EPSP) to form chorismate, which is a precursor to aromatic amino acids
YGL157W	K.AHLVAIEKPEC@TGQR.L	YGL157W	3.072	570.298	-0.37	Oxidoreductase, catalyzes NADPH-dependent reduction of the bicyclic diketone bicyclo[2.2.2]octane-2,6-dione (BCO2,6D) to the chiral ketoalcohol (1R,4S,6S)-6-hydroxybicyclo[2.2.2]octane-2-one (BCO2one6ol)
YGL202W	R.D#CAIDALYK.Y	ARO8	2.437	534.755	0.43	Aromatic aminotransferase I, expression is regulated by general control of amino acid biosynthesis
YGL206C	K.LVNDAC@IEKK.E	CHC1	2.931	595.316	0.09	Clathrin heavy chain, subunit of the major coat protein involved in intracellular protein transport and endocytosis; two heavy chains form the clathrin triskelion structural component; the light chain (CLC1) is thought to regulate function
YGL206C	R.ALENYTDIKDIKR.C	CHC1	2.065	395.467	-0.29	Clathrin heavy chain, subunit of the major coat protein involved in intracellular protein transport and endocytosis; two heavy chains form the clathrin triskelion structural component; the light chain (CLC1) is thought to regulate function
YGL206C	R.LC@YSAVSNYSK.L	CHC1	3.876	646.303	0.29	Clathrin heavy chain, subunit of the major coat protein involved in intracellular protein transport and endocytosis; two heavy chains form the clathrin triskelion structural component; the light chain (CLC1) is thought to regulate function
YGL207W	R.STNDQLYGNGC@ILASC@GIR.Y	SPT16	4.248	1049.99	0.11	Subunit of the heterodimeric FACT complex (Spt16p-Pob3p), facilitates RNA Polymerase II transcription elongation through nucleosomes by destabilizing and then reassembling nucleosome structure
YGL221C	K.TVIVC@NHSNTER.G	NIF3	3.422	715.345	-2.21	Protein of unknown function, similar to Listeria monocytogenes major sigma factor (rpoD gene product); the authentic, non-tagged protein is detected in highly purified mitochondria in high-throughput studies
YGL234W	K.DAPGC@VIENGTK.L	ADE5	3.252	630.798	0.65	Bifunctional enzyme of the 'de novo' purine nucleotide biosynthetic pathway, contains aminoimidazole ribotide synthetase and glycinamide ribotide synthetase activities
YGL234W	R.KIIQHVALPWDAPC@PWDESK.T	ADE5	2.122	598.305	0.18	Bifunctional enzyme of the 'de novo' purine nucleotide biosynthetic pathway, contains aminoimidazole ribotide synthetase and glycinamide ribotide synthetase activities
YGL242C	K.LINESKEPLGNTALH#LCC@K.Y	YGL242C	2.543	550.033	-0.17	Putative protein of unknown function; deletion mutant is viable
YGL245W	K.AYC@DDTPTEK.M	GUS1	3.264	600.248	-0.03	Glutamyl-tRNA synthetase (GluRS), forms a complex with methionyl-tRNA synthetase (Mes1p) and Arc1p; complex formation increases the catalytic efficiency of both tRNA synthetases and ensures their correct localization to the cytoplasm
YGL245W	K.TLRDPVIYR.C	GUS1	2.828	378.221	0.1	Glutamyl-tRNA synthetase (GluRS), forms a complex with methionyl-tRNA synthetase (Mes1p) and Arc1p; complex formation increases the catalytic efficiency of both tRNA synthetases and ensures their correct localization to the cytoplasm
YGL245W	K.YSAADVAC@WGALR.S	GUS1	4.982	720.341	0.26	Glutamyl-tRNA synthetase (GluRS), forms a complex with methionyl-tRNA synthetase (Mes1p) and Arc1p; complex formation increases the catalytic efficiency of both tRNA synthetases and ensures their correct localization to the cytoplasm
YGL245W	K.YSAADVACWGALR[.S	GUS1	3.137	720.339	-1.49	Glutamyl-tRNA synthetase (GluRS), forms a complex with methionyl-tRNA synthetase (Mes1p) and Arc1p; complex formation increases the catalytic efficiency of both tRNA synthetases and ensures their correct localization to the cytoplasm
YGL245W	R.SNGMC@GSIIK.N	GUS1	2.688	541.752	-0.24	Glutamyl-tRNA synthetase (GluRS), forms a complex with methionyl-tRNA synthetase (Mes1p) and Arc1p; complex formation increases the catalytic efficiency of both tRNA synthetases and ensures their correct localization to the cytoplasm
YGL253W	K.LSDDIPPSAPMAINC@EYGSFDNEHVVLPR.T	HXK2	3.865	1087.17	0.44	Hexokinase isoenzyme 2 that catalyzes phosphorylation of glucose in the cytosol; predominant hexokinase during growth on glucose; functions in the nucleus to repress expression of HXK1 and GLK1 and to induce expression of its own gene
YGL253W	R.LSVC@GIAAIC@QK.R	HXK2	4.401	660.344	-0.17	Hexokinase isoenzyme 2 that catalyzes phosphorylation of glucose in the cytosol; predominant hexokinase during growth on glucose; functions in the nucleus to repress expression of HXK1 and GLK1 and to induce expression of its own gene
YGR017W	K.TDGKDEDLWEEQEVC@P.-	YGR017W	3.231	975.406	-0.63	Putative protein of unknown function; green fluorescent protein (GFP)-fusion protein localizes to both the nucleus and the cytoplasm
YGR019W	K.LNGC@NVGGC@AVHAVR.L	UGA1	3.467	528.589	0.48	Gamma-aminobutyrate (GABA) transaminase (4-aminobutyrate aminotransferase) involved in the 4-aminobutyrate and glutamate degradation pathways; required for normal oxidative stress tolerance and nitrogen utilization
YGR019W	R.QFNTWC@GEPAR.M	UGA1	3.063	683.303	-1.04	Gamma-aminobutyrate (GABA) transaminase (4-aminobutyrate aminotransferase) involved in the 4-aminobutyrate and glutamate degradation pathways; required for normal oxidative stress tolerance and nitrogen utilization
YGR032W	K.HC@EYYQC@GK.G	GSC2	3.04	622.745	-0.14	Catalytic subunit of 1,3-beta-glucan synthase, involved in formation of the inner layer of the spore wall; activity positively regulated by Rho1p and negatively by Smk1p; has similarity to an alternate catalytic subunit, Fks1p (Gsc1p)
YGR032W	K.HC@EYYQCGK#.G	GSC2	2.498	622.745	-0.14	Catalytic subunit of 1,3-beta-glucan synthase, involved in formation of the inner layer of the spore wall; activity positively regulated by Rho1p and negatively by Smk1p; has similarity to an alternate catalytic subunit, Fks1p (Gsc1p)
YGR054W	K.DC@VSEDIVPAYEYQAK.S	YGR054W	5.259	943.927	-0.16	Eukaryotic initiation factor (eIF) 2A; associates specifically with both 40S subunits and 80 S ribosomes, and interacts genetically with both eIF5b and eIF4E; homologous to mammalian eIF2A
YGR061C	K.ATNIAHVC@GLQDK.V	ADE6	3	476.242	0.52	Formylglycinamidine-ribonucleotide (FGAM)-synthetase, catalyzes a step in the 'de novo' purine nucleotide biosynthetic pathway
YGR061C	K.FFNERQDTFAFGAC@NGC@QFLSR.L	ADE6	6.173	891.395	-2.53	Formylglycinamidine-ribonucleotide (FGAM)-synthetase, catalyzes a step in the 'de novo' purine nucleotide biosynthetic pathway
YGR061C	R.LKDIIPGC@ENWPSFER.N	ADE6	2.995	654.324	-0.6	Formylglycinamidine-ribonucleotide (FGAM)-synthetase, catalyzes a step in the 'de novo' purine nucleotide biosynthetic pathway
YGR061C	R.QDTFAFGAC@NGC@QFLSR.L	ADE6	5.038	989.93	-0.44	Formylglycinamidine-ribonucleotide (FGAM)-synthetase, catalyzes a step in the 'de novo' purine nucleotide biosynthetic pathway
YGR061C	R.VC@MVQISQEK.D	ADE6	2.894	611.302	0.32	Formylglycinamidine-ribonucleotide (FGAM)-synthetase, catalyzes a step in the 'de novo' purine nucleotide biosynthetic pathway
YGR094W	K.ESYPNGIPQC@GTDAMR.F	VAS1	2.667	906.389	0.9	Mitochondrial and cytoplasmic valyl-tRNA synthetase
YGR094W	K.NLYVGQEDNEMTIPTC@SR.S	VAS1	4.475	1071.97	-0.27	Mitochondrial and cytoplasmic valyl-tRNA synthetase
YGR118W	K.KVTAFVPND#GCLNFVDENDEVLLAGFGR.K	RPS23A	3.918	1032.84	-0.42	Ribosomal protein 28 (rp28) of the small (40S) ribosomal subunit, required for translational accuracy; nearly identical to Rps23Bp and similar to E. coli S12 and rat S23 ribosomal proteins; deletion of both RPS23A and RPS23B is lethal
YGR118W	K.VTAFVPNDGC@LNFVDENDEVLLAGFGR.K	RPS23A	4.369	990.142	-0.82	Ribosomal protein 28 (rp28) of the small (40S) ribosomal subunit, required for translational accuracy; nearly identical to Rps23Bp and similar to E. coli S12 and rat S23 ribosomal proteins; deletion of both RPS23A and RPS23B is lethal
YGR124W	K.A]DWGCAEDPSGR.Y	ASN2	3.378	660.768	0.48	Asparagine synthetase, isozyme of Asn1p; catalyzes the synthesis of L-asparagine from L-aspartate in the asparagine biosynthetic pathway
YGR124W	K.NLHLADC@LR.A	ASN2	2.502	556.288	0.22	Asparagine synthetase, isozyme of Asn1p; catalyzes the synthesis of L-asparagine from L-aspartate in the asparagine biosynthetic pathway
YGR124W	R.SSQSPETVYFASELK.C	ASN2	3.792	836.907	0.56	Asparagine synthetase, isozyme of Asn1p; catalyzes the synthesis of L-asparagine from L-aspartate in the asparagine biosynthetic pathway
YGR159C	K.EIDGRPINC@DMSTSKPAGNNDR.A	NSR1	4.1	821.704	0.02	Nucleolar protein that binds nuclear localization sequences, required for pre-rRNA processing and ribosome biogenesis
YGR175C	R.ILC@AYNSPK.V	ERG1	2.787	533.273	-0.79	Squalene epoxidase, catalyzes the epoxidation of squalene to 2,3-oxidosqualene; plays an essential role in the ergosterol-biosynthesis pathway and is the specific target of the antifungal drug terbinafine
YGR181W	R.NDAC@IDQC@LAK.Y	TIM13	3.692	654.29	0.63	Mitochondrial intermembrane space protein, forms a complex with TIm8p that mediates import and insertion of a subset of polytopic inner membrane proteins; may prevent aggregation of incoming proteins in a chaperone-like manner
YGR187C	K.NVENEDIGELC@YR.I	HGH1	3.534	805.859	-0.88	Nonessential protein of unknown function; green fluorescent protein (GFP)-fusion protein localizes to the cytoplasm; similar to mammalian BRP16 (Brain protein 16)
YGR192C	K.I]VSNASC@TTNC@LAPLAK.V	TDH3	5.085	938.966	-0.64	Glyceraldehyde-3-phosphate dehydrogenase, isozyme 3, involved in glycolysis and gluconeogenesis; tetramer that catalyzes the reaction of glyceraldehyde-3-phosphate to 1,3 bis-phosphoglycerate; detected in the cytoplasm and cell-wall
YGR192C	K.IVSNASC@TTNC@LAPLAK.V	TDH3	5.012	910.456	0.62	Glyceraldehyde-3-phosphate dehydrogenase, isozyme 3, involved in glycolysis and gluconeogenesis; tetramer that catalyzes the reaction of glyceraldehyde-3-phosphate to 1,3 bis-phosphoglycerate; detected in the cytoplasm and cell-wall
YGR192C	K.YTSDLKIVSNASC@TTNC@LAPLAK.V	TDH3	2.658	843.089	0.19	Glyceraldehyde-3-phosphate dehydrogenase, isozyme 3, involved in glycolysis and gluconeogenesis; tetramer that catalyzes the reaction of glyceraldehyde-3-phosphate to 1,3 bis-phosphoglycerate; detected in the cytoplasm and cell-wall
YGR204W	K.A]CAQQFR.S	ADE3	2.419	440.708	-0.01	Cytoplasmic trifunctional enzyme C1-tetrahydrofolate synthase, involved in single carbon metabolism and required for biosynthesis of purines, thymidylate, methionine, and histidine
YGR204W	K.C@VGDVEFNEAIK.Y	ADE3	4.021	690.827	0.14	Cytoplasmic trifunctional enzyme C1-tetrahydrofolate synthase, involved in single carbon metabolism and required for biosynthesis of purines, thymidylate, methionine, and histidine
YGR204W	K.EQGFGNLPIC@IAK.T	ADE3	3.293	723.874	0.18	Cytoplasmic trifunctional enzyme C1-tetrahydrofolate synthase, involved in single carbon metabolism and required for biosynthesis of purines, thymidylate, methionine, and histidine
YGR204W	K.NGHPFFLPC@TPK.G	ADE3	2.719	472.236	-0.47	Cytoplasmic trifunctional enzyme C1-tetrahydrofolate synthase, involved in single carbon metabolism and required for biosynthesis of purines, thymidylate, methionine, and histidine
YGR207C	K.GIDTC@SLIDSVGK.E	YGR207C	3.928	682.84	-0.51	Protein that interacts with frataxin (Yfh1p); putative homolog of mammalian electron transfer flavoprotein complex subunit ETF-beta; authentic, non-tagged protein is detected in highly purified mitochondria in high-throughput studies
YGR208W	K.TLGPIVDGQC@K.S	SER2	2.641	594.308	0.35	Phosphoserine phosphatase of the phosphoglycerate pathway, involved in serine and glycine biosynthesis, expression is regulated by the available nitrogen source
YGR214W	K.EASYVNIPVIALTDLDSPSEFVDVAIPCNNR[.G	RPS0A	2.892	1140.23	-0.02	Protein component of the small (40S) ribosomal subunit, nearly identical to Rps0Bp; required for maturation of 18S rRNA along with Rps0Bp; deletion of either RPS0 gene reduces growth rate, deletion of both genes is lethal
YGR234W	R.HYSLC@SASTK.N	YHB1	2.774	577.269	-0.32	Nitric oxide oxidoreductase, flavohemoglobin involved in nitric oxide detoxification; plays a role in the oxidative and nitrosative stress responses
YGR240C	-.MQSQDSC@YGVAFR.S	PFK1	4.508	782.83	0.1	Alpha subunit of heterooctameric phosphofructokinase involved in glycolysis, indispensable for anaerobic growth, activated by fructose-2,6-bisphosphate and AMP, mutation inhibits glucose induction of cell cycle-related genes
YGR254W	K.IGLDC@ASSEFFK.D	ENO1	3.157	687.323	-0.68	Enolase I, a phosphopyruvate hydratase that catalyzes the conversion of 2-phosphoglycerate to phosphoenolpyruvate during glycolysis and the reverse reaction during gluconeogenesis; expression is repressed in response to glucose
YGR254W	K.IGLDC@ASSEFFKDGK.Y	ENO1	2.747	558.6	0.31	Enolase I, a phosphopyruvate hydratase that catalyzes the conversion of 2-phosphoglycerate to phosphoenolpyruvate during glycolysis and the reverse reaction during gluconeogenesis; expression is repressed in response to glucose
YGR264C	R.C@KLDDASPEPK.Y	MES1	3.653	630.301	0.18	Methionyl-tRNA synthetase, forms a complex with glutamyl-tRNA synthetase (Gus1p) and Arc1p, which increases the catalytic efficiency of both tRNA synthetases; also has a role in nuclear export of tRNAs
YGR285C	R.AQYDSC@DFVADVPPPK.K	ZUO1	5.303	904.912	0.86	Cytosolic ribosome-associated chaperone that acts, together with Ssz1p and the Ssb proteins, as a chaperone for nascent polypeptide chains; contains a DnaJ domain and functions as a J-protein partner for Ssb1p and Ssb2p
YHL011C	R.VVC@TNTVPFEEK.I	PRS3	3.521	711.851	0.27	5-phospho-ribosyl-1(alpha)-pyrophosphate synthetase, synthesizes PRPP, which is required for nucleotide, histidine, and tryptophan biosynthesis; one of five related enzymes, which are active as heteromultimeric complexes
YHR012W	K.IGC@C@SGYTVVPK.N	VPS29	3.66	670.821	0.47	Endosomal protein that is a subunit of the membrane-associated retromer complex essential for endosome-to-Golgi retrograde transport; forms a subcomplex with Vps35p and Vps26p that selects cargo proteins for endosome-to-Golgi retrieval
YHR019C	K.YGTC@PHGGYGIGTER.I	DED81	4.046	812.862	-0.23	Cytosolic asparaginyl-tRNA synthetase, required for protein synthesis, catalyzes the specific attachment of asparagine to its cognate tRNA
YHR020W	K.SLC@IPFDQPVLNEGQK.C	YHR020W	3.906	922.964	0.21	Protein of unknown function that may interact with ribosomes, based on co-purification experiments; has similarity to proline-tRNA ligase; YHR020W is an essential gene
YHR021C	R.SYFLDVK.C	RPS27B	2.179	436.232	0.71	Protein component of the small (40S) ribosomal subunit; nearly identical to Rps27Ap and has similarity to rat S27 ribosomal protein
YHR025W	K.YQWNPAIK.C	THR1	2.24	510.269	0.25	Homoserine kinase, conserved protein required for threonine biosynthesis; expression is regulated by the GCN4-mediated general amino acid control pathway
YHR025W	R.TALYVLR.C	THR1	2.159	418.256	0.17	Homoserine kinase, conserved protein required for threonine biosynthesis; expression is regulated by the GCN4-mediated general amino acid control pathway
YHR037W	K.C]TGAVVSQQWFGGAR.M	PUT2	4.608	812.387	-1.81	Delta-1-pyrroline-5-carboxylate dehydrogenase, nuclear-encoded mitochondrial protein involved in utilization of proline as sole nitrogen source; deficiency of the human homolog causes HPII, an autosomal recessive inborn error of metabolism
YHR039C	K.FGGEEGLLGLC@NAK.S	MSC7	4.654	732.861	-0.2	Protein of unknown function, green fluorescent protein (GFP)-fusion protein localizes to the endoplasmic reticulum; msc7 mutants are defective in directing meiotic recombination events to homologous chromatids
YHR040W	K.C]CEFYRLAGTSSCIEGEDGSETKEE#R[.T	BCD1	2.152	1024.1	-0.66	Essential protein required for the accumulation of box C/D snoRNA
YHR063C	K.C@EC@PETFSK.K	PAN5	2.669	579.234	-0.22	2-dehydropantoate 2-reductase, part of the pantothenic acid pathway, structurally homologous to E. coli panE
YHR064C	R.DFIGLPFDKC@DVSK.C	SSZ1	2.039	547.604	-0.02	Hsp70 protein that interacts with Zuo1p (a DnaJ homolog) to form a ribosome-associated complex that binds the ribosome via the Zuo1p subunit; also involved in pleiotropic drug resistance via sequential activation of PDR1 and PDR5; binds ATP
YHR068W	K.HGADC@LEANQDVDSPIWTPSK.M	DYS1	4.474	780.69	-0.5	Deoxyhypusine synthase, catalyzes formation of deoxyhypusine, the first step in hypusine biosynthesis; triggers posttranslational hypusination of translation elongation factor eIF-5A and regulates its intracellular levels; tetrameric
YHR068W	K.KGC@FDEEGYQK.T	DYS1	3.554	680.796	0.57	Deoxyhypusine synthase, catalyzes formation of deoxyhypusine, the first step in hypusine biosynthesis; triggers posttranslational hypusination of translation elongation factor eIF-5A and regulates its intracellular levels; tetrameric
YHR068W	K.MVDAVVTSAGGVEEDLIK.C	DYS1	4.819	924.966	-0.68	Deoxyhypusine synthase, catalyzes formation of deoxyhypusine, the first step in hypusine biosynthesis; triggers posttranslational hypusination of translation elongation factor eIF-5A and regulates its intracellular levels; tetrameric
YHR068W	R.IGNLLVPNDNYC@K.F	DYS1	3.125	760.383	0.68	Deoxyhypusine synthase, catalyzes formation of deoxyhypusine, the first step in hypusine biosynthesis; triggers posttranslational hypusination of translation elongation factor eIF-5A and regulates its intracellular levels; tetrameric
YHR089C	K.C@GDGVQATSFKEGDK.F	GAR1	4.026	533.575	-0.19	Protein component of the H/ACA snoRNP pseudouridylase complex, involved in the modification and cleavage of the 18S pre-rRNA
YHR104W	R.LFDGAC@DYGNEK.E	GRE3	4.734	694.793	-0.52	Aldose reductase involved in methylglyoxal, d-xylose and arabinose metabolism; stress induced (osmotic, ionic, oxidative, heat shock, starvation and heavy metals); regulated by the HOG pathway
YHR112C	K.C]ASEGDIVHLESPVNPYGTSSDIESLAR.R	YHR112C	5.845	1001.8	-0.73	Putative protein of unknown function; green fluorescent protein (GFP)-fusion protein localizes to the cytoplasm
YHR128W	K.IC@GVSIVR.A	FUR1	2.03	452.258	-0.02	Uracil phosphoribosyltransferase, synthesizes UMP from uracil; involved in the pyrimidine salvage pathway
YHR143W-A	K.YIC@AEC@SSK.L	RPC10	2.574	559.236	-0.31	RNA polymerase subunit, found in RNA polymerase complexes I, II, and III
YHR183W	K.SDGEPC@CE#WVGPAGAGHYVK.M	GND1	3.024	725.979	-0.18	6-phosphogluconate dehydrogenase (decarboxylating), catalyzes an NADPH regenerating reaction in the pentose phosphate pathway; required for growth on D-glucono-delta-lactone and adaptation to oxidative stress
YHR183W	R.VLPEC@ASDNLPVDKDIHINWTGHGGNVSSSTYQA.-	GND1	3.317	1227.91	-1.2	6-phosphogluconate dehydrogenase (decarboxylating), catalyzes an NADPH regenerating reaction in the pentose phosphate pathway; required for growth on D-glucono-delta-lactone and adaptation to oxidative stress
YHR208W	K.EIGWNNEDIHVPLLPGEQC@GALTK.Q	BAT1	3.326	897.446	0.04	Mitochondrial branched-chain amino acid aminotransferase, homolog of murine ECA39; highly expressed during logarithmic phase and repressed during stationary phase
YHR208W	K.KLGANYAPC@ILPQLQAAK.R	BAT1	3.072	652.696	0	Mitochondrial branched-chain amino acid aminotransferase, homolog of murine ECA39; highly expressed during logarithmic phase and repressed during stationary phase
YHR208W	K.LGANYAPC@ILPQLQAAK.R	BAT1	3.885	914.493	0	Mitochondrial branched-chain amino acid aminotransferase, homolog of murine ECA39; highly expressed during logarithmic phase and repressed during stationary phase
YIL021W	K.NC@EYEDPPNEGDPFDYK.A	RPB3	4.544	1044.91	-0.13	RNA polymerase II third largest subunit B44, part of central core; similar to prokaryotic alpha subunit
YIL039W	R.EGLC@VDGPDTR.Y	TED1	3.121	609.775	-0.07	Conserved phosphoesterase domain-containing protein that acts together with Emp24p/Erv25p in cargo exit from the ER; deletion confers sensitivity to 4-(N-(S-glutathionylacetyl)amino) phenylarsenoxide (GSAO)
YIL041W	R.LSFEIGKADK.C	GVP36	2.488	369.873	0.18	BAR domain-containing protein that localizes to both early and late Golgi vesicles; required for adaptation to varying nutrient concentrations, fluid-phase endocytosis, polarization of the actin cytoskeleton, and vacuole biogenesis
YIL078W	K.NSSC@YFLGDATNDSLQR.V	THS1	5.818	974.429	-0.12	Threonyl-tRNA synthetase, essential cytoplasmic protein
YIL078W	K.VPDGGATTVYR.C	THS1	3.287	568.291	-0.27	Threonyl-tRNA synthetase, essential cytoplasmic protein
YIL116W	K.IYNLEPYR.C	HIS5	2.738	534.28	-0.1	Histidinol-phosphate aminotransferase, catalyzes the seventh step in histidine biosynthesis; responsive to general control of amino acid biosynthesis; mutations cause histidine auxotrophy and sensitivity to Cu, Co, and Ni salts
YIL125W	R.YC@GRNPSGAVAAGSK.S	KGD1	4.032	747.86	0.35	Component of the mitochondrial alpha-ketoglutarate dehydrogenase complex, which catalyzes a key step in the tricarboxylic acid (TCA) cycle, the oxidative decarboxylation of alpha-ketoglutarate to form succinyl-CoA
YIL138C	K.KC@EEFQSKYEEAQK.E	TPM2	3.788	601.946	0.18	Minor isoform of tropomyosin, binds to and stabilizes actin cables and filaments, which direct polarized cell growth and the distribution of several organelles; appears to have distinct and also overlapping functions with Tpm1p
YIL142W	K.LLQSASSNTC@MVTNDGATILK.S	CCT2	4.441	1120.55	1.11	Subunit beta of the cytosolic chaperonin Cct ring complex, related to Tcp1p, required for the assembly of actin and tubulins in vivo
YIL148W	K.C]GHTNQLRPK.K	RPL40A	1.753	605.809	0.09	Fusion protein, identical to Rpl40Bp, that is cleaved to yield ubiquitin and a ribosomal protein of the large (60S) ribosomal subunit with similarity to rat L40; ubiquitin may facilitate assembly of the ribosomal protein into ribosomes
YIL148W	K.CGH#TNQLRPK.K	RPL40A	1.783	605.809	0.12	Fusion protein, identical to Rpl40Bp, that is cleaved to yield ubiquitin and a ribosomal protein of the large (60S) ribosomal subunit with similarity to rat L40; ubiquitin may facilitate assembly of the ribosomal protein into ribosomes
YIL148W	K.YNC@DKSVC@R.K	RPL40A	3.366	601.258	-0.12	Fusion protein, identical to Rpl40Bp, that is cleaved to yield ubiquitin and a ribosomal protein of the large (60S) ribosomal subunit with similarity to rat L40; ubiquitin may facilitate assembly of the ribosomal protein into ribosomes
YIR006C	K.NISNPENC@YDSSIPSDLTSR.F	PAN1	4.539	1135	-1.57	Part of actin cytoskeleton-regulatory complex Pan1p-Sla1p-End3p, associates with actin patches on the cell cortex; promotes protein-protein interactions essential for endocytosis; previously thought to be a subunit of poly(A) ribonuclease
YIR034C	R.C@GSGAIDLLHK.V	LYS1	3.18	390.87	1.06	Saccharopine dehydrogenase (NAD+, L-lysine-forming), catalyzes the conversion of saccharopine to L-lysine, which is the final step in the lysine biosynthesis pathway
YJL052W	K.KIVSNASC@TTNC@LAPLAK.V	TDH1	3.608	650.005	0.26	Glyceraldehyde-3-phosphate dehydrogenase, isozyme 1, involved in glycolysis and gluconeogenesis; tetramer that catalyzes the reaction of glyceraldehyde-3-phosphate to 1,3 bis-phosphoglycerate; detected in the cytoplasm and cell-wall
YJL080C	K.FAC@QIDIPNEENNNASK.D	SCP160	4.924	982.443	-1.21	Essential RNA-binding G protein effector of mating response pathway, mainly associated with nuclear envelope and ER, interacts in mRNA-dependent manner with translating ribosomes via multiple KH domains, similar to vertebrate vigilins
YJL080C	K.KLTKPINAVIEVPSK.C	SCP160	2.767	546.338	-0.49	Essential RNA-binding G protein effector of mating response pathway, mainly associated with nuclear envelope and ER, interacts in mRNA-dependent manner with translating ribosomes via multiple KH domains, similar to vertebrate vigilins
YJL080C	K.LTKPINAVIEVPSK.C	SCP160	3.69	503.64	-0.09	Essential RNA-binding G protein effector of mating response pathway, mainly associated with nuclear envelope and ER, interacts in mRNA-dependent manner with translating ribosomes via multiple KH domains, similar to vertebrate vigilins
YJL080C	K.V]CGSTEGENAEK.T	SCP160	1.502	640.775	0.4	Essential RNA-binding G protein effector of mating response pathway, mainly associated with nuclear envelope and ER, interacts in mRNA-dependent manner with translating ribosomes via multiple KH domains, similar to vertebrate vigilins
YJL080C	K.VC@GSTEGENAEK.T	SCP160	1.261	640.775	0.13	Essential RNA-binding G protein effector of mating response pathway, mainly associated with nuclear envelope and ER, interacts in mRNA-dependent manner with translating ribosomes via multiple KH domains, similar to vertebrate vigilins
YJL121C	K.C@GADQFTFHYEATQDPLHLVK.L	RPE1	3.29	620.044	0.11	D-ribulose-5-phosphate 3-epimerase, catalyzes a reaction in the non-oxidative part of the pentose-phosphate pathway; mutants are sensitive to oxidative stress
YJL121C	K.C]GADQFTFHYEATQDPLHLVK.L	RPE1	5.811	620.044	0.21	D-ribulose-5-phosphate 3-epimerase, catalyzes a reaction in the non-oxidative part of the pentose-phosphate pathway; mutants are sensitive to oxidative stress
YJL121C	K.WVDDFAK.C	RPE1	2.548	440.713	-0.36	D-ribulose-5-phosphate 3-epimerase, catalyzes a reaction in the non-oxidative part of the pentose-phosphate pathway; mutants are sensitive to oxidative stress
YJL130C	K.C]IVNPSPASITASAELQSTSAK.R	URA2	4.701	1116.56	-1.03	Bifunctional carbamoylphosphate synthetase (CPSase)-aspartate transcarbamylase (ATCase), catalyzes the first two enzymatic steps in the de novo biosynthesis of pyrimidines; both activities are subject to feedback inhibition by UTP
YJL130C	R.GHNIPC@TSTISGR.C	URA2	2.85	467.23	0.99	Bifunctional carbamoylphosphate synthetase (CPSase)-aspartate transcarbamylase (ATCase), catalyzes the first two enzymatic steps in the de novo biosynthesis of pyrimidines; both activities are subject to feedback inhibition by UTP
YJL136C	K.GQLVELYVPRK.C	RPS21B	3.361	651.383	0.12	Protein component of the small (40S) ribosomal subunit; nearly identical to Rps21Ap and has similarity to rat S21 ribosomal protein
YJL145W	K.C@AGYDELYGYK.L	SFH5	2.708	669.787	-0.84	Putative phosphatidylinositol transfer protein (PITP), exhibits phosphatidylinositol- but not phosphatidylcholine-transfer activity, localized to cytosol and microsomes, similar to Sec14p; may be PITP regulator rather than actual PITP
YJL167W	K.EAC@DWYAHSLNYNTPGGK.L	ERG20	5.4	1041.95	-1.52	Farnesyl pyrophosphate synthetase, has both dimethylallyltranstransferase and geranyltranstransferase activities; catalyzes the formation of C15 farnesyl pyrophosphate units for isoprenoid and sterol biosynthesis
YJL167W	K.IGTDIQDNK.C	ERG20	3.051	502.256	0.1	Farnesyl pyrophosphate synthetase, has both dimethylallyltranstransferase and geranyltranstransferase activities; catalyzes the formation of C15 farnesyl pyrophosphate units for isoprenoid and sterol biosynthesis
YJL167W	K.IGTDIQDNKC@SWVINK.A	ERG20	3.969	945.972	-0.76	Farnesyl pyrophosphate synthetase, has both dimethylallyltranstransferase and geranyltranstransferase activities; catalyzes the formation of C15 farnesyl pyrophosphate units for isoprenoid and sterol biosynthesis
YJL172W	K.CE#KIEPLSPSFK.H	CPS1	3.426	478.915	-0.29	Vacuolar carboxypeptidase yscS; expression is induced under low-nitrogen conditions
YJL172W	K.TILGAPFC@PR.R	CPS1	2.594	566.303	0.34	Vacuolar carboxypeptidase yscS; expression is induced under low-nitrogen conditions
YJL183W	R.GTC@ASEIGHMYQK.I	MNN11	3.407	741.329	0.15	Subunit of a Golgi mannosyltransferase complex that also contains Anp1p, Mnn9p, Mnn10p, and Hoc1p, and mediates elongation of the polysaccharide mannan backbone; has homology to Mnn10p
YJL190C	K.C@GVISPR.F	RPS22A	2.714	394.708	-0.36	Protein component of the small (40S) ribosomal subunit; nearly identical to Rps22Bp and has similarity to E. coli S8 and rat S15a ribosomal proteins
YJL200C	K.VSAGLIGSC@TNSSYQDMSR.V	ACO2	5.349	1024.96	1.78	Putative mitochondrial aconitase isozyme; similarity to Aco1p, an aconitase required for the TCA cycle; expression induced during growth on glucose, by amino acid starvation via Gcn4p, and repressed on ethanol
YJR007W	K.YGGVC@NITMPPK.A	SUI2	4.263	676.821	0.09	Alpha subunit of the translation initiation factor eIF2, involved in the identification of the start codon; phosphorylation of Ser51 is required for regulation of translation by inhibiting the exchange of GDP for GTP
YJR016C	K.EKLAEC@DNIGEYIKK.T	ILV3	2.721	603.973	0.02	Dihydroxyacid dehydratase, catalyzes third step in the common pathway leading to biosynthesis of branched-chain amino acids
YJR016C	K.LAEC@DNIGEYIKK.T	ILV3	2.154	518.261	0.08	Dihydroxyacid dehydratase, catalyzes third step in the common pathway leading to biosynthesis of branched-chain amino acids
YJR016C	K.LVSNASNGC@VLDA.-	ILV3	3.873	660.317	0.45	Dihydroxyacid dehydratase, catalyzes third step in the common pathway leading to biosynthesis of branched-chain amino acids
YJR063W	K.C]PQC@GNEEMNYHTLQLR.S	RPA12	4.669	717.312	-0.01	RNA polymerase I subunit A12.2; contains two zinc binding domains, and the N terminal domain is responsible for anchoring to the RNA pol I complex
YJR063W	R.SADEGATVFYTC@TSC@GYK.F	RPA12	5.451	1008.92	-0.2	RNA polymerase I subunit A12.2; contains two zinc binding domains, and the N terminal domain is responsible for anchoring to the RNA pol I complex
YJR065C	K.IKQEYC@YVC@PDIVK.E	ARP3	3.719	605.631	-0.95	Essential component of the Arp2/3 complex, which is a highly conserved actin nucleation center required for the motility and integrity of actin patches; involved in endocytosis and membrane growth and polarity
YJR070C	R.ETC@ELAINR.I	LIA1	3.125	553.268	-0.97	Deoxyhypusine hydroxylase, a HEAT-repeat containing metalloenzyme that catalyses hypusine formation; binds to and is required for the modification of Hyp2p (eIF5A); complements S. pombe mmd1 mutants defective in mitochondrial positioning
YJR077C	K.FALAGAIGC@GSTHSSMVPIDVVK.T	MIR1	2.839	778.392	-0.21	Mitochondrial phosphate carrier, imports inorganic phosphate into mitochondria; functionally redundant with Pic2p but more abundant than Pic2p under normal conditions; phosphorylated
YJR094W-A	R.GAAGIWTC@SC@C@KK.T	RPL43B	3.149	749.834	-0.06	Protein component of the large (60S) ribosomal subunit, identical to Rpl43Ap and has similarity to rat L37a ribosomal protein
YJR094W-A	R.YDC@SFC@GKK.T	RPL43B	2.192	388.832	-0.33	Protein component of the large (60S) ribosomal subunit, identical to Rpl43Ap and has similarity to rat L37a ribosomal protein
YJR094W-A	R.YDC@SFCGK#.K	RPL43B	1.958	518.697	0.12	Protein component of the large (60S) ribosomal subunit, identical to Rpl43Ap and has similarity to rat L37a ribosomal protein
YJR096W	K.FLDHPDAYEPTDWEC@TDAP.-	YJR096W	4.079	1139.97	0.79	Putative xylose and arabinose reductase; member of the aldo-keto reductase (AKR) family; GFP-fusion protein is induced in response to the DNA-damaging agent MMS
YJR103W	R.C@EIFELK.G	URA8	2.509	469.736	-0.25	Minor CTP synthase isozyme (see also URA7), catalyzes the ATP-dependent transfer of the amide nitrogen from glutamine to UTP, forming CTP, the final step in de novo biosynthesis of pyrimidines; involved in phospholipid biosynthesis
YJR104C	K.TGNAGPRPAC@GVIGLTN.-	SOD1	3.454	827.92	0.35	Cytosolic superoxide dismutase; some mutations are analogous to those that cause ALS (amyotrophic lateral sclerosis) in humans
YJR105W	K.C]AALITGHNR.S	ADO1	3.569	556.785	-0.42	Adenosine kinase, required for the utilization of S-adenosylmethionine (AdoMet); may be involved in recycling adenosine produced through the methyl cycle
YJR105W	K.SMYQVQNDIGTGK.C	ADO1	4.638	728.84	-0.21	Adenosine kinase, required for the utilization of S-adenosylmethionine (AdoMet); may be involved in recycling adenosine produced through the methyl cycle
YJR123W	K.AQC@PIIER.L	RPS5	2.775	493.758	0	Protein component of the small (40S) ribosomal subunit, the least basic of the non-acidic ribosomal proteins; phosphorylated in vivo; essential for viability; has similarity to E. coli S7 and rat S5 ribosomal proteins
YJR144W	R.GEQDYFNEAGIPTATEGC@K.S	MGM101	4.617	1043.96	0.73	Protein involved in mitochondrial genome maintenance; component of the mitochondrial nucleoid, required for the repair of oxidative mtDNA damage
YJR148W	K.KLGANYAPC@VLPQLQAASR.G	BAT2	4.202	686.371	1.27	Cytosolic branched-chain amino acid aminotransferase, homolog of murine ECA39; highly expressed during stationary phase and repressed during logarithmic phase
YJR148W	K.LGANYAPC@VLPQLQAASR.G	BAT2	4.599	965.004	0.19	Cytosolic branched-chain amino acid aminotransferase, homolog of murine ECA39; highly expressed during stationary phase and repressed during logarithmic phase
YJR148W	R.IC@LPTFDPEELITLIGK.L	BAT2	3.587	980.028	-0.63	Cytosolic branched-chain amino acid aminotransferase, homolog of murine ECA39; highly expressed during stationary phase and repressed during logarithmic phase
YKL006W	K.WAAAAVC@EK.W	RPL14A	3.717	503.245	0.05	N-terminally acetylated protein component of the large (60S) ribosomal subunit, nearly identical to Rpl14Bp and has similarity to rat L14 ribosomal protein; rpl14a csh5 double null mutant exhibits synthetic slow growth
YKL029C	R.DFDEC@LQWVK.A	MAE1	3.974	670.303	-0.2	Mitochondrial malic enzyme, catalyzes the oxidative decarboxylation of malate to pyruvate, which is a key intermediate in sugar metabolism and a precursor for synthesis of several amino acids
YKL029C	R.VLPVC@LDVGTNNK.K	MAE1	2.913	714.88	0.33	Mitochondrial malic enzyme, catalyzes the oxidative decarboxylation of malate to pyruvate, which is a key intermediate in sugar metabolism and a precursor for synthesis of several amino acids
YKL033W-A	K.FHTDIKPDEC@IVFEDGIPGVK.S	YKL033W-A	3.827	806.067	0.95	Putative protein of unknown function; similar to uncharacterized proteins from other fungi
YKL033W-A	K.NIPIALC@TSSNK.T	YKL033W-A	2.673	659.345	-0.17	Putative protein of unknown function; similar to uncharacterized proteins from other fungi
YKL035W	K.LNGGLGTSMGC@VGPK.S	UGP1	4.907	732.353	0.03	UDP-glucose pyrophosphorylase (UGPase), catalyses the reversible formation of UDP-Glc from glucose 1-phosphate and UTP, involved in a wide variety of metabolic pathways, expression modulated by Pho85p through Pho4p
YKL035W	K.TC@SDLLLVK.S	UGP1	2.477	524.789	0.34	UDP-glucose pyrophosphorylase (UGPase), catalyses the reversible formation of UDP-Glc from glucose 1-phosphate and UTP, involved in a wide variety of metabolic pathways, expression modulated by Pho85p through Pho4p
YKL040C	R.LQGAC@TSC@SSSEVTLK.Y	NFU1	4.023	864.4	-0.71	Protein involved in iron metabolism in mitochondria; similar to NifU, which is a protein required for the maturation of the Fe/S clusters of nitrogenase in nitrogen-fixing bacteria
YKL060C	K.EHGEPLFSSHMLDLSEETDEENISTC@VK.Y	FBA1	3.067	813.11	0.03	Fructose 1,6-bisphosphate aldolase, required for glycolysis and gluconeogenesis; catalyzes conversion of fructose 1,6 bisphosphate to glyceraldehyde-3-P and dihydroxyacetone-P; locates to mitochondrial outer surface upon oxidative stress
YKL060C	K.VNLDTDC@QYAYLTGIR.D	FBA1	4.867	951.456	-0.4	Fructose 1,6-bisphosphate aldolase, required for glycolysis and gluconeogenesis; catalyzes conversion of fructose 1,6 bisphosphate to glyceraldehyde-3-P and dihydroxyacetone-P; locates to mitochondrial outer surface upon oxidative stress
YKL060C	R.SIAPAYGIPVVLHSDHC@AK.K	FBA1	4.354	1018.02	-0.71	Fructose 1,6-bisphosphate aldolase, required for glycolysis and gluconeogenesis; catalyzes conversion of fructose 1,6 bisphosphate to glyceraldehyde-3-P and dihydroxyacetone-P; locates to mitochondrial outer surface upon oxidative stress
YKL060C	R.SIAPAYGIPVVLHSDHC@AKK.L	FBA1	4.32	1082.07	-0.74	Fructose 1,6-bisphosphate aldolase, required for glycolysis and gluconeogenesis; catalyzes conversion of fructose 1,6 bisphosphate to glyceraldehyde-3-P and dihydroxyacetone-P; locates to mitochondrial outer surface upon oxidative stress
YKL067W	R.NVC@HGSDSVDSAER.E	YNK1	2.843	766.822	-1.24	Nucleoside diphosphate kinase, catalyzes the transfer of gamma phosphates from nucleoside triphosphates, usually ATP, to nucleoside diphosphates by a mechanism that involves formation of an autophosphorylated enzyme intermediate
YKL085W	K.IHPIGELSSEEEEMLQK.C	MDH1	3.942	656.99	-2.02	Mitochondrial malate dehydrogenase, catalyzes interconversion of malate and oxaloacetate; involved in the tricarboxylic acid (TCA) cycle; phosphorylated
YKL103C	K.SALVDSTPLPVC@R.I	LAP4	3.898	707.872	0.05	Vacuolar aminopeptidase, often used as a marker protein in studies of autophagy and cytosol to vacuole targeting (CVT) pathway
YKL127W	K.C]TGGGIILTASHNPGGPENDLGIK.Y	PGM1	3.993	793.398	1.68	Phosphoglucomutase, minor isoform; catalyzes the conversion from glucose-1-phosphate to glucose-6-phosphate, which is a key step in hexose metabolism
YKL181W	K.IFVGNSHPELGNMVCQR[.L	PRS1	2.197	653.317	-0.93	5-phospho-ribosyl-1(alpha)-pyrophosphate synthetase, synthesizes PRPP, which is required for nucleotide, histidine, and tryptophan biosynthesis; one of five related enzymes, which are active as heteromultimeric complexes
YKL182W	K.C]FGPIKVELPTK.E	FAS1	3.535	463.592	-0.17	Beta subunit of fatty acid synthetase, which catalyzes the synthesis of long-chain saturated fatty acids; contains acetyltransacylase, dehydratase, enoyl reductase, malonyl transacylase, and palmitoyl transacylase activities
YKL182W	K.EVYDFTHAVGNNC@EDFVSRPDR.T	FAS1	4.803	876.391	-0.12	Beta subunit of fatty acid synthetase, which catalyzes the synthesis of long-chain saturated fatty acids; contains acetyltransacylase, dehydratase, enoyl reductase, malonyl transacylase, and palmitoyl transacylase activities
YKL182W	R.TC@ILHGPVAAQFTK.V	FAS1	2.833	514.941	0.09	Beta subunit of fatty acid synthetase, which catalyzes the synthesis of long-chain saturated fatty acids; contains acetyltransacylase, dehydratase, enoyl reductase, malonyl transacylase, and palmitoyl transacylase activities
YKL210W	K.GVLESISDSLSSKPHNFEDCIK[.W	UBA1	2.56	821.401	0.4	Ubiquitin activating enzyme (E1), involved in ubiquitin-mediated protein degradation and essential for viability
YKL211C	R.YHSLAGTESSLPSC@LK.V	TRP3	4.478	875.427	-0.01	Bifunctional enzyme exhibiting both indole-3-glycerol-phosphate synthase and anthranilate synthase activities, forms multifunctional hetero-oligomeric anthranilate synthase:indole-3-glycerol phosphate synthase enzyme complex with Trp2p
YKL216W	K.FLNNTYENPFMNASGVHC@MTTQELDELANSK.A	URA1	4.426	902.65	-0.19	Dihydroorotate dehydrogenase, catalyzes the fourth enzymatic step in the de novo biosynthesis of pyrimidines, converting dihydroorotic acid into orotic acid
YKR031C	R.M]LKSCAEKGIK.I	SPO14	2.459	632.841	-0.13	Phospholipase D, catalyzes the hydrolysis of phosphatidylcholine, producing choline and phosphatidic acid; involved in Sec14p-independent secretion; required for meiosis and spore formation; differently regulated in secretion and meiosis
YLL026W	K.SNPC@LIGEPGIGK.T	HSP104	3.734	671.345	-0.03	Heat shock protein that cooperates with Ydj1p (Hsp40) and Ssa1p (Hsp70) to refold and reactivate previously denatured, aggregated proteins; responsive to stresses including: heat, ethanol, and sodium arsenite; involved in [PSI+] propagation
YLR027C	K.LSTVSPVFVC@QSFAK.N	AAT2	3.184	835.434	-0.26	Cytosolic aspartate aminotransferase, involved in nitrogen metabolism; localizes to peroxisomes in oleate-grown cells
YLR027C	R.VGC@FHLALTK.Q	AAT2	3.025	382.543	0.09	Cytosolic aspartate aminotransferase, involved in nitrogen metabolism; localizes to peroxisomes in oleate-grown cells
YLR028C	K.YC@ILQIDPNYVPGQMESR.E	ADE16	3.477	1100.01	-1.14	Enzyme of 'de novo' purine biosynthesis containing both 5-aminoimidazole-4-carboxamide ribonucleotide transformylase and inosine monophosphate cyclohydrolase activities, isozyme of Ade17p; ade16 ade17 mutants require adenine and histidine
YLR029C	R.YNWIC@DPVHK.H	RPL15A	3.202	444.545	0.36	Protein component of the large (60S) ribosomal subunit, nearly identical to Rpl15Bp and has similarity to rat L15 ribosomal protein; binds to 5.8 S rRNA
YLR044C	K.DAKNPVILADAC@C@SR.H	PDC1	3.806	563.94	0	Major of three pyruvate decarboxylase isozymes, key enzyme in alcoholic fermentation, decarboxylates pyruvate to acetaldehyde; subject to glucose-, ethanol-, and autoregulation; involved in amino acid catabolism
YLR044C	K.NPVILADAC@C@SR.H	PDC1	4.654	688.327	0.36	Major of three pyruvate decarboxylase isozymes, key enzyme in alcoholic fermentation, decarboxylates pyruvate to acetaldehyde; subject to glucose-, ethanol-, and autoregulation; involved in amino acid catabolism
YLR044C	R.MSANISETTAMITDIATAPAEIDR.C	PDC1	3.602	852.072	0.19	Major of three pyruvate decarboxylase isozymes, key enzyme in alcoholic fermentation, decarboxylates pyruvate to acetaldehyde; subject to glucose-, ethanol-, and autoregulation; involved in amino acid catabolism
YLR058C	K.GVDGARVEYIC@EK.I	SHM2	3.595	748.364	0.42	Cytosolic serine hydroxymethyltransferase, converts serine to glycine plus 5,10 methylenetetrahydrofolate; major isoform involved in generating precursors for purine, pyrimidine, amino acid, and lipid biosynthesis
YLR058C	K.VLVAGTSAYC@R.L	SHM2	3.907	598.808	0.22	Cytosolic serine hydroxymethyltransferase, converts serine to glycine plus 5,10 methylenetetrahydrofolate; major isoform involved in generating precursors for purine, pyrimidine, amino acid, and lipid biosynthesis
YLR058C	R.MEILC@QQR.A	SHM2	2.949	539.263	0.6	Cytosolic serine hydroxymethyltransferase, converts serine to glycine plus 5,10 methylenetetrahydrofolate; major isoform involved in generating precursors for purine, pyrimidine, amino acid, and lipid biosynthesis
YLR058C	R.YYGGNEHIDRMEILCQQR[.A	SHM2	2.643	761.353	-0.41	Cytosolic serine hydroxymethyltransferase, converts serine to glycine plus 5,10 methylenetetrahydrofolate; major isoform involved in generating precursors for purine, pyrimidine, amino acid, and lipid biosynthesis
YLR060W	R.YC@DEPFTVEPVEIVSEHNGQSR.L	FRS1	3.758	864.727	-0.14	Beta subunit of cytoplasmic phenylalanyl-tRNA synthetase, forms a tetramer with Frs2p to generate active enzyme; sequence is evolutionarily distant from mitochondrial phenylalanyl-tRNA synthetase (Msf1p), but substrate binding is similar
YLR075W	K.ATVDEFPLC@VHLVSNELEQLSSEALEAAR.I	RPL10	5.533	1076.53	-1.65	Protein component of the large (60S) ribosomal subunit, responsible for joining the 40S and 60S subunits; regulates translation initiation; has similarity to rat L10 ribosomal protein and to members of the QM gene family
YLR075W	K.MLSC@AGADR.L	RPL10	3.509	490.718	-0.03	Protein component of the large (60S) ribosomal subunit, responsible for joining the 40S and 60S subunits; regulates translation initiation; has similarity to rat L10 ribosomal protein and to members of the QM gene family
YLR075W	K.MLSC@AGADRLQQGMR.G	RPL10	2.446	565.269	-0.18	Protein component of the large (60S) ribosomal subunit, responsible for joining the 40S and 60S subunits; regulates translation initiation; has similarity to rat L10 ribosomal protein and to members of the QM gene family
YLR109W	K.FASDPGC@AFTK.S	AHP1	3.604	600.771	0.21	Thiol-specific peroxiredoxin, reduces hydroperoxides to protect against oxidative damage; function in vivo requires covalent conjugation to Urm1p
YLR109W	K.FQYIAISQSDADSESC@K.M	AHP1	5.767	974.933	-0.26	Thiol-specific peroxiredoxin, reduces hydroperoxides to protect against oxidative damage; function in vivo requires covalent conjugation to Urm1p
YLR109W	K.FQYIAISQSDADSESC@KMPQTVEWSK.L	AHP1	4.427	1012.46	-0.56	Thiol-specific peroxiredoxin, reduces hydroperoxides to protect against oxidative damage; function in vivo requires covalent conjugation to Urm1p
YLR109W	K.FQYIAISQSDADSESCK#MPQTVEWSK.L	AHP1	5.527	1017.79	-0.33	Thiol-specific peroxiredoxin, reduces hydroperoxides to protect against oxidative damage; function in vivo requires covalent conjugation to Urm1p
YLR109W	K.VIITGAPAAFSPTC@TVSHIPGYINYLDELVK.E	AHP1	2.273	1116.25	-0.75	Thiol-specific peroxiredoxin, reduces hydroperoxides to protect against oxidative damage; function in vivo requires covalent conjugation to Urm1p
YLR126C	R.QC@QELDNNGIQAAR.N	YLR126C	4.327	808.875	-0.5	Putative protein of unknown function with similarity to glutamine amidotransferase proteins; has Aft1p-binding motif in the promoter; may be involved in copper and iron homeostasis; YLR126C is not an essential protein
YLR153C	K.LNASYNC@VDR.H	ACS2	2.885	606.277	0.02	Acetyl-coA synthetase isoform which, along with Acs1p, is the nuclear source of acetyl-coA for histone acetylation; mutants affect global transcription; required for growth on glucose; expressed under anaerobic conditions
YLR153C	K.VVITC@DEGKR.G	ACS2	2.789	588.806	0.52	Acetyl-coA synthetase isoform which, along with Acs1p, is the nuclear source of acetyl-coA for histone acetylation; mutants affect global transcription; required for growth on glucose; expressed under anaerobic conditions
YLR167W	K.L]RRECSNPTC@GAGVFLANHK.D	RPS31	2.626	572.535	-0.09	Fusion protein that is cleaved to yield a ribosomal protein of the small (40S) subunit and ubiquitin; ubiquitin may facilitate assembly of the ribosomal protein into ribosomes; interacts genetically with translation factor eIF2B
YLR167W	R.REC@SNPTC@GAGVFLANHK.D	RPS31	5.444	673.316	-0.04	Fusion protein that is cleaved to yield a ribosomal protein of the small (40S) subunit and ubiquitin; ubiquitin may facilitate assembly of the ribosomal protein into ribosomes; interacts genetically with translation factor eIF2B
YLR175W	K.DSAVNAVC@YGAK.L	CBF5	4.125	627.792	-1.04	Pseudouridine synthase catalytic subunit of box H/ACA small nucleolar ribonucleoprotein particles (snoRNPs), acts on both large and small rRNAs and on snRNA U2
YLR180W	K.TC@NVLVAIEQQSPDIAQGVHEEK.D	SAM1	5.268	855.759	0.23	S-adenosylmethionine synthetase, catalyzes transfer of the adenosyl group of ATP to the sulfur atom of methionine; one of two differentially regulated isozymes (Sam1p and Sam2p)
YLR185W	K.KTC@SSC@GYPAAK.T	RPL37A	2.712	665.299	-1.41	Protein component of the large (60S) ribosomal subunit, has similarity to Rpl37Bp and to rat L37 ribosomal protein
YLR185W	K.TC@SSC@GYPAAK.T	RPL37A	3.337	601.253	0.18	Protein component of the large (60S) ribosomal subunit, has similarity to Rpl37Bp and to rat L37 ribosomal protein
YLR197W	R.QLYDYLC@EK.M	SIK1	2.36	616.287	0.28	Essential evolutionarily-conserved nucleolar protein component of the box C/D snoRNP complexes that direct 2'-O-methylation of pre-rRNA during its maturation; overexpression causes spindle orientation defects
YLR199C	K.NLQSLEVC@PVPK.V	PBA1	2.819	692.369	-0.01	Protein involved in 20S proteasome assembly; forms a heterodimer with Add66p that binds to proteasome precursors; similar to human PAC1 constituent of the PAC1-PAC2 complex involved in proteasome assembly
YLR216C	K.IDD#CGVLPDDYQVPENAEATPTDEYGDNYEDVLKQDEKVDLK.N	CPR6	2.329	1204.55	-0.66	Peptidyl-prolyl cis-trans isomerase (cyclophilin), catalyzes the cis-trans isomerization of peptide bonds N-terminal to proline residues; binds to Hsp82p and contributes to chaperone activity
YLR216C	K.LC@EGNAGMAK.T	CPR6	2.792	525.739	0.28	Peptidyl-prolyl cis-trans isomerase (cyclophilin), catalyzes the cis-trans isomerization of peptide bonds N-terminal to proline residues; binds to Hsp82p and contributes to chaperone activity
YLR216C	R.LIENQQCD#QENNKPLRDVK.I	CPR6	2.63	781.057	-0.19	Peptidyl-prolyl cis-trans isomerase (cyclophilin), catalyzes the cis-trans isomerization of peptide bonds N-terminal to proline residues; binds to Hsp82p and contributes to chaperone activity
YLR229C	K.YVEC@SALTQR.G	CDC42	3.276	613.795	-0.56	Small rho-like GTPase, essential for establishment and maintenance of cell polarity; mutants have defects in the organization of actin and septins
YLR234W	K.V]LC@VAEKNSIAK.A	TOP3	1.659	694.882	0.14	DNA Topoisomerase III, conserved protein that functions in a complex with Sgs1p and Rmi1p to relax single-stranded negatively-supercoiled DNA preferentially, involved in telomere stability and regulation of mitotic recombination
YLR244C	K.MC@KPGTTFQELGDHIEK.H	MAP1	3.038	498.489	-0.25	Methionine aminopeptidase, catalyzes the cotranslational removal of N-terminal methionine from nascent polypeptides; function is partially redundant with that of Map2p
YLR249W	K.EIEEHC@SMLGLDPEIVSHSR.I	YEF3	4.534	780.032	0.27	Translational elongation factor 3, stimulates the binding of aminoacyl-tRNA (AA-tRNA) to ribosomes by releasing EF-1 alpha from the ribosomal complex; contains two ABC cassettes; binds and hydrolyses ATP
YLR249W	K.GNFTEFVKK.C	YEF3	2.43	535.287	-0.07	Translational elongation factor 3, stimulates the binding of aminoacyl-tRNA (AA-tRNA) to ribosomes by releasing EF-1 alpha from the ribosomal complex; contains two ABC cassettes; binds and hydrolyses ATP
YLR249W	K.SAVIIDNMC@K.L	YEF3	3.012	575.783	0.16	Translational elongation factor 3, stimulates the binding of aminoacyl-tRNA (AA-tRNA) to ribosomes by releasing EF-1 alpha from the ribosomal complex; contains two ABC cassettes; binds and hydrolyses ATP
YLR249W	K.STLINVLTGELLPTSGEVYTHENCR[.I	YEF3	3.406	935.136	0.1	Translational elongation factor 3, stimulates the binding of aminoacyl-tRNA (AA-tRNA) to ribosomes by releasing EF-1 alpha from the ribosomal complex; contains two ABC cassettes; binds and hydrolyses ATP
YLR249W	K.VTNMEFQYPGTSKPQITDINFQC@SLSSR.I	YEF3	4.304	1088.85	-0.5	Translational elongation factor 3, stimulates the binding of aminoacyl-tRNA (AA-tRNA) to ribosomes by releasing EF-1 alpha from the ribosomal complex; contains two ABC cassettes; binds and hydrolyses ATP
YLR249W	K.YKGNFTEFVKK.C	YEF3	3.244	680.866	-0.44	Translational elongation factor 3, stimulates the binding of aminoacyl-tRNA (AA-tRNA) to ribosomes by releasing EF-1 alpha from the ribosomal complex; contains two ABC cassettes; binds and hydrolyses ATP
YLR249W	R.AIANGQVDGFPTQEEC@R.T	YEF3	5.783	946.434	-0.22	Translational elongation factor 3, stimulates the binding of aminoacyl-tRNA (AA-tRNA) to ribosomes by releasing EF-1 alpha from the ribosomal complex; contains two ABC cassettes; binds and hydrolyses ATP
YLR249W	R.KEIEEHC@SMLGLDPEIVSHSR.I	YEF3	4.768	822.73	0.02	Translational elongation factor 3, stimulates the binding of aminoacyl-tRNA (AA-tRNA) to ribosomes by releasing EF-1 alpha from the ribosomal complex; contains two ABC cassettes; binds and hydrolyses ATP
YLR249W	R.KSAVIIDNMC@K.L	YEF3	4.232	639.831	0.85	Translational elongation factor 3, stimulates the binding of aminoacyl-tRNA (AA-tRNA) to ribosomes by releasing EF-1 alpha from the ribosomal complex; contains two ABC cassettes; binds and hydrolyses ATP
YLR249W	R.RYGIC@GPNGC@GK.S	YEF3	4.649	669.806	-0.01	Translational elongation factor 3, stimulates the binding of aminoacyl-tRNA (AA-tRNA) to ribosomes by releasing EF-1 alpha from the ribosomal complex; contains two ABC cassettes; binds and hydrolyses ATP
YLR249W	R.YGIC@GPNGC@GK.S	YEF3	3.785	591.755	-0.08	Translational elongation factor 3, stimulates the binding of aminoacyl-tRNA (AA-tRNA) to ribosomes by releasing EF-1 alpha from the ribosomal complex; contains two ABC cassettes; binds and hydrolyses ATP
YLR268W	K.STLIYREDGLPLC@TSVDNENDPSLFEQK.Q	SEC22	3.614	1080.85	-1.03	R-SNARE protein; assembles into SNARE complex with Bet1p, Bos1p and Sed5p; cycles between the ER and Golgi complex; involved in anterograde and retrograde transport between the ER and Golgi; synaptobrevin homolog
YLR270W	R.IVQPYIEEMC@NNGR.L	DCS1	3.646	861.899	-2.34	Non-essential hydrolase involved in mRNA decapping, may function in a feedback mechanism to regulate deadenylation, contains pyrophosphatase activity and a HIT (histidine triad) motif; interacts with neutral trehalase Nth1p
YLR287C	K.IFNAC@DSLSNC@SK.A	YLR287C	4.339	758.331	-1.13	Putative protein of unknown function; green fluorescent protein (GFP)-fusion protein localizes to the cytoplasm; YLR287C is not an essential gene
YLR300W	R.YDGSWVNGDQTSSYIGSC@ANNDDIAYWSDERK.E	EXG1	6.445	1225.18	-1.85	Major exo-1,3-beta-glucanase of the cell wall, involved in cell wall beta-glucan assembly; exists as three differentially glycosylated isoenzymes
YLR301W	K.NWDSGC@VEETGAVYPFGADK.E	YLR301W	6.351	1101.48	0.47	Protein of unknown function that interacts with Sec72p
YLR301W	K.NWDSGC@VEETGAVYPFGADKESVSFR.E	YLR301W	2.693	969.768	-0.24	Protein of unknown function that interacts with Sec72p
YLR304C	K.EFGGIVLANAC@GPCIGQWD#RR.D	ACO1	2.304	792.716	0.2	Aconitase, required for the tricarboxylic acid (TCA) cycle and also independently required for mitochondrial genome maintenance; phosphorylated; component of the mitochondrial nucleoid; mutation leads to glutamate auxotrophy
YLR304C	R.VGLIGSC@TNSSYEDMSR.S	ACO1	4.86	946.411	-0.49	Aconitase, required for the tricarboxylic acid (TCA) cycle and also independently required for mitochondrial genome maintenance; phosphorylated; component of the mitochondrial nucleoid; mutation leads to glutamate auxotrophy
YLR355C	K.YGMDYMYDAC@STTAR.R	ILV5	4.317	918.846	-1.35	Acetohydroxyacid reductoisomerase, mitochondrial protein involved in branched-chain amino acid biosynthesis, also required for maintenance of wild-type mitochondrial DNA and found in mitochondrial nucleoids
YLR388W	R.VC@SSHTGLIRK.Y	RPS29A	3.427	629.34	-0.51	Protein component of the small (40S) ribosomal subunit; nearly identical to Rps29Bp and has similarity to rat S29 and E. coli S14 ribosomal proteins
YLR390W-A	K.C@LDSIC@PNNDADAAYSAFK.S	CCW14	5.583	1066.46	-0.07	Covalently linked cell wall glycoprotein, present in the inner layer of the cell wall
YLR420W	K.IILEHC@TSESAIK.T	URA4	3.346	750.89	-0.14	Dihydroorotase, catalyzes the third enzymatic step in the de novo biosynthesis of pyrimidines, converting carbamoyl-L-aspartate into dihydroorotate
YLR420W	R.EGAMC@ELVTPK.I	URA4	3.263	617.794	-0.32	Dihydroorotase, catalyzes the third enzymatic step in the de novo biosynthesis of pyrimidines, converting carbamoyl-L-aspartate into dihydroorotate
YLR420W	R.EGAMCE#LVTPK.I	URA4	2.818	617.794	-0.18	Dihydroorotase, catalyzes the third enzymatic step in the de novo biosynthesis of pyrimidines, converting carbamoyl-L-aspartate into dihydroorotate
YLR432W	K.FIPYLYNGLQHSC@QDIGYK.S	IMD3	4.898	1158.56	0.75	Inosine monophosphate dehydrogenase, catalyzes the first step of GMP biosynthesis, member of a four-gene family in S. cerevisiae, constitutively expressed
YLR432W	K.FIPYLYNGLQHSCQD#IGYK.S	IMD3	4.161	1158.56	-1.85	Inosine monophosphate dehydrogenase, catalyzes the first step of GMP biosynthesis, member of a four-gene family in S. cerevisiae, constitutively expressed
YML004C	K.ASNDPTLLLNHTC@LR.V	GLO1	3.549	862.941	-0.41	Monomeric glyoxalase I, catalyzes the detoxification of methylglyoxal (a by-product of glycolysis) via condensation with glutathione to produce S-D-lactoylglutathione; expression regulated by methylglyoxal levels and osmotic stress
YML008C	R.FTGC@NVIGLNNNDYQIAK.A	ERG6	5.578	1020.99	-0.4	Delta(24)-sterol C-methyltransferase, converts zymosterol to fecosterol in the ergosterol biosynthetic pathway by methylating position C-24; localized to both lipid particles and mitochondrial outer membrane
YML028W	K.NGTVLPC@NWTPGAATIKPTVEDSK.E	TSA1	1.865	852.764	-0.04	Thioredoxin peroxidase, acts as both a ribosome-associated and free cytoplasmic antioxidant; self-associates to form a high-molecular weight chaperone complex under oxidative stress; deletion results in mutator phenotype
YML028W	R.LVEAFQWTDKNGTVLPC@NWTPGAATIKPTVEDSK.E	TSA1	3.164	944.226	-0.75	Thioredoxin peroxidase, acts as both a ribosome-associated and free cytoplasmic antioxidant; self-associates to form a high-molecular weight chaperone complex under oxidative stress; deletion results in mutator phenotype
YML058W	R.C@QQQQAPSTLR.T	SML1	3.514	658.823	0.25	Ribonucleotide reductase inhibitor involved in regulating dNTP production; regulated by Mec1p and Rad53p during DNA damage and S phase
YML072C	K.ANNDGVAVFDEE#CSFK.A	TCB3	4.071	901.388	-0.03	Lipid-binding protein, localized to the bud via specific mRNA transport; non-tagged protein detected in a phosphorylated state in mitochondria; GFP-fusion protein localizes to the cell periphery; C-termini of Tcb1p, Tcb2p and Tcb3p interact
YML085C	K.I]GICYEPPTATPNSQLATVDR.A	TUB1	5.568	1152.07	0.74	Alpha-tubulin; associates with beta-tubulin (Tub2p) to form tubulin dimer, which polymerizes to form microtubules
YML086C	R.C@SNTTLPSEPLDTSK.R	ALO1	3.399	825.388	0.43	D-Arabinono-1,4-lactone oxidase, catalyzes the final step in biosynthesis of D-erythroascorbic acid, which is protective against oxidative stress
YML126C	K.YFDYNVFHVPTC@K.L	ERG13	4.114	845.389	-1.57	3-hydroxy-3-methylglutaryl-CoA (HMG-CoA) synthase, catalyzes the formation of HMG-CoA from acetyl-CoA and acetoacetyl-CoA; involved in the second step in mevalonate biosynthesis
YMR008C	K.IAVAC@SGGGYR.A	PLB1	3.01	555.772	0.2	Phospholipase B (lysophospholipase) involved in lipid metabolism, required for deacylation of phosphatidylcholine and phosphatidylethanolamine but not phosphatidylinositol
YMR079W	K.EFLESYPQNC@PPDALPGTPGNLDSAQEK.A	SEC14	4.151	1025.47	1.2	Phosphatidylinositol/phosphatidylcholine transfer protein involved in coordinate regulation of PtdIns and PtdCho metabolism, products of which are regulators in Golgi to plasma membrane transport; functionally homologous to mammalian PITPs
YMR083W	K.YSGVC@HTDLHAWHGDWPLPVK.L	ADH3	2.469	619.547	0.28	Mitochondrial alcohol dehydrogenase isozyme III; involved in the shuttling of mitochondrial NADH to the cytosol under anaerobic conditions and ethanol production
YMR091C	R.AITEQQNFEK.C	NPL6	3.163	604.302	0.41	Component of the RSC chromatin remodeling complex; interacts with Rsc3p, Rsc30p, Ldb7p, and Htl1p to form a module important for a broad range of RSC functions; involved in nuclear protein import and maintenance of proper telomere length
YMR092C	R.NFTTHLSYDPTTNAIAYPCGK#.S	AIP1	5.221	791.039	-0.12	Actin cortical patch component, interacts with the actin depolymerizing factor cofilin; required to restrict cofilin localization to cortical patches; contains WD repeats
YMR120C	K.VDYVVC@NLYPFK.E	ADE17	2.868	758.878	-1.62	Enzyme of 'de novo' purine biosynthesis containing both 5-aminoimidazole-4-carboxamide ribonucleotide transformylase and inosine monophosphate cyclohydrolase activities, isozyme of Ade16p; ade16 ade17 mutants require adenine and histidine
YMR120C	K.VDYVVC@NLYPFKETVAK.V	ADE17	2.18	682.352	-0.23	Enzyme of 'de novo' purine biosynthesis containing both 5-aminoimidazole-4-carboxamide ribonucleotide transformylase and inosine monophosphate cyclohydrolase activities, isozyme of Ade16p; ade16 ade17 mutants require adenine and histidine
YMR120C	K.VLC@GSPGYINLLDALNSWPLVK.E	ADE17	4.761	810.434	-0.4	Enzyme of 'de novo' purine biosynthesis containing both 5-aminoimidazole-4-carboxamide ribonucleotide transformylase and inosine monophosphate cyclohydrolase activities, isozyme of Ade16p; ade16 ade17 mutants require adenine and histidine
YMR120C	K.Y#CILQIDPNYVPEAVERR.Q	ADE17	2.215	745.712	-0.81	Enzyme of 'de novo' purine biosynthesis containing both 5-aminoimidazole-4-carboxamide ribonucleotide transformylase and inosine monophosphate cyclohydrolase activities, isozyme of Ade16p; ade16 ade17 mutants require adenine and histidine
YMR120C	K.YTQSNSVC@YAR.N	ADE17	3.394	674.801	0.01	Enzyme of 'de novo' purine biosynthesis containing both 5-aminoimidazole-4-carboxamide ribonucleotide transformylase and inosine monophosphate cyclohydrolase activities, isozyme of Ade16p; ade16 ade17 mutants require adenine and histidine
YMR146C	K.KYETDC@PLNTAVITPLK.E	TIF34	5.555	982.014	0.55	Subunit of the core complex of translation initiation factor 3(eIF3), which is essential for translation
YMR146C	K.LWDVSNGQC@VATWK.S	TIF34	5.018	832.398	-0.75	Subunit of the core complex of translation initiation factor 3(eIF3), which is essential for translation
YMR189W	K.AVDVLKNPDVSGC@LVQYPATDGSILPPDSMK.Q	GCV2	3.97	1101.55	-0.35	P subunit of the mitochondrial glycine decarboxylase complex, required for the catabolism of glycine to 5,10-methylene-THF; expression is regulated by levels of 5,10-methylene-THF in the cytoplasm
YMR189W	K.GFC@EQEMLQHLEK.I	GCV2	1.964	550.254	0.18	P subunit of the mitochondrial glycine decarboxylase complex, required for the catabolism of glycine to 5,10-methylene-THF; expression is regulated by levels of 5,10-methylene-THF in the cytoplasm
YMR189W	K.TFSIPHGGGGPAGAPIC@VK.S	GCV2	3.325	608.315	1.63	P subunit of the mitochondrial glycine decarboxylase complex, required for the catabolism of glycine to 5,10-methylene-THF; expression is regulated by levels of 5,10-methylene-THF in the cytoplasm
YMR189W	R.DLSLANSMIPLGSC@TMK.L	GCV2	4.809	935.441	-0.66	P subunit of the mitochondrial glycine decarboxylase complex, required for the catabolism of glycine to 5,10-methylene-THF; expression is regulated by levels of 5,10-methylene-THF in the cytoplasm
YMR200W	R.QLFSDPC@NDDGVSTYSR.Y	ROT1	4.642	980.921	0.35	Essential ER membrane protein; may be involved in protein folding; mutation causes defects in cell wall synthesis and in lysis of autophagic bodies, suppresses tor2 mutations, and is synthetically lethal with kar2-1 and with rot2 mutations
YMR205C	R.GWSAEGGTNIGTAR.C	PFK2	4.282	688.831	-0.2	Beta subunit of heterooctameric phosphofructokinase involved in glycolysis, indispensable for anaerobic growth, activated by fructose-2,6-bisphosphate and AMP, mutation inhibits glucose induction of cell cycle-related genes
YMR215W	K.GVDYQPGGSSGYDADSDTDILSDPEVC@AR.D	GAS3	4.229	1016.1	-1.06	Putative 1,3-beta-glucanosyltransferase, has similarity to Gas1p; localizes to the cell wall
YMR217W	K.NFAVDLC@HAK.Q	GUA1	2.46	392.194	-0.43	GMP synthase, an enzyme that catalyzes the second step in the biosynthesis of GMP from inosine 5'-phosphate (IMP); transcription is not subject to regulation by guanine but is negatively regulated by nutrient starvation
YMR226C	R.DAYPTGSIYC@ASK.F	YMR226C	3.643	716.824	-0.08	NADP(+)-dependent dehydrogenase; acts on serine, L-allo-threonine, and other 3-hydroxy acids; green fluorescent protein fusion protein localizes to the cytoplasm and nucleus; may interact with ribosomes, based on co-purification experiments
YMR235C	K.C@IAENTQVR.E	RNA1	3.085	545.769	0.03	GTPase activating protein (GAP) for Gsp1p, involved in nuclear transport
YMR238W	K.S]CNGGTDGHTC@GLNWQK.Q	DFG5	2.786	631.265	-0.54	Putative mannosidase, essential glycosylphosphatidylinositol (GPI)-anchored membrane protein required for cell wall biogenesis in bud formation, involved in filamentous growth, homologous to Dcw1p
YMR260C	R.DFQDDQC@DVVHK.Y	TIF11	3.895	753.319	-0.54	Translation initiation factor eIF1A, essential protein that forms a complex with Sui1p (eIF1) and the 40S ribosomal subunit and scans for the start codon; C-terminus associates with Fun12p (eIF5B); N terminus interacts with eIF2 and eIF3
YMR260C	R.VEASC@FDGNK.R	TIF11	2.863	563.745	-0.04	Translation initiation factor eIF1A, essential protein that forms a complex with Sui1p (eIF1) and the 40S ribosomal subunit and scans for the start codon; C-terminus associates with Fun12p (eIF5B); N terminus interacts with eIF2 and eIF3
YMR260C	R.VEASC@FDGNKR.M	TIF11	3.244	641.795	-0.65	Translation initiation factor eIF1A, essential protein that forms a complex with Sui1p (eIF1) and the 40S ribosomal subunit and scans for the start codon; C-terminus associates with Fun12p (eIF5B); N terminus interacts with eIF2 and eIF3
YMR261C	K.VDC@NNQELSNNKQER.S	TPS3	3.033	924.419	0.75	Regulatory subunit of trehalose-6-phosphate synthase/phosphatase complex, which synthesizes the storage carbohydrate trehalose; expression is induced by stress conditions and repressed by the Ras-cAMP pathway
YMR290C	K.QNNAAPEGEQTTC@VEK.F	HAS1	3.388	888.397	0.66	ATP-dependent RNA helicase; localizes to both the nuclear periphery and nucleolus; highly enriched in nuclear pore complex fractions; constituent of 66S pre-ribosomal particles
YMR291W	R.LPEEKPWPQLSGSNADAQTFK.C	YMR291W	3.922	781.727	1.45	Putative kinase of unknown function; green fluorescent protein (GFP)-fusion protein localizes to the cytoplasm and nucleus; YMR291W is not an essential gene
YMR296C	K.QSILAC@C@QESNK.-	LCB1	4.418	719.327	0.19	Component of serine palmitoyltransferase, responsible along with Lcb2p for the first committed step in sphingolipid synthesis, which is the condensation of serine with palmitoyl-CoA to form 3-ketosphinganine
YMR300C	R.GQDAAGIATC@GSR.G	ADE4	4.077	632.291	0.24	Phosphoribosylpyrophosphate amidotransferase (PRPPAT; amidophosphoribosyltransferase), catalyzes first step of the 'de novo' purine nucleotide biosynthetic pathway
YMR300C	R.TC@ALEC@ANVLGKPYR.E	ADE4	2.222	584.623	-0.67	Phosphoribosylpyrophosphate amidotransferase (PRPPAT; amidophosphoribosyltransferase), catalyzes first step of the 'de novo' purine nucleotide biosynthetic pathway
YMR305C	K.GITYSPYNDDGSC@K.S	SCW10	3.259	788.832	-0.46	Cell wall protein with similarity to glucanases; may play a role in conjugation during mating based on mutant phenotype and its regulation by Ste12p
YMR305C	R.LYGVDC@SQVENVLQAK.T	SCW10	5.726	911.952	-1.84	Cell wall protein with similarity to glucanases; may play a role in conjugation during mating based on mutant phenotype and its regulation by Ste12p
YMR307W	K.MTDYFAC@GDDDVK.A	GAS1	4.057	768.802	-1.09	Beta-1,3-glucanosyltransferase, required for cell wall assembly; localizes to the cell surface via a glycosylphosphatidylinositol (GPI) anchor
YMR307W	K.YGAYSFC@TPK.E	GAS1	3.564	597.269	0.19	Beta-1,3-glucanosyltransferase, required for cell wall assembly; localizes to the cell surface via a glycosylphosphatidylinositol (GPI) anchor
YMR315W	K.IAESTPLPVGVAENWLYLPC@IK.I	YMR315W	3.534	824.105	-1.74	Putative protein of unknown function; green fluorescent protein (GFP)-fusion protein localizes to the cytoplasm and nucleus; YMR315W is not an essential gene
YNL010W	K.AGEQRPVYFYC@GDGVSDLSAAK.E	YNL010W	5.932	797.374	-0.35	Putative protein of unknown function with similarity to phosphoserine phosphatases; green fluorescent protein (GFP)-fusion protein localizes to the cytoplasm and nucleus; homozygous diploid mutant shows an increase in glycogen accumulation
YNL010W	K.E]CDLLFAK.R	YNL010W	2.095	498.247	0.12	Putative protein of unknown function with similarity to phosphoserine phosphatases; green fluorescent protein (GFP)-fusion protein localizes to the cytoplasm and nucleus; homozygous diploid mutant shows an increase in glycogen accumulation
YNL055C	K.A]TMNCKLPNSNVNIEFATR.Y	POR1	3.345	732.689	-0.45	Mitochondrial porin (voltage-dependent anion channel), outer membrane protein required for the maintenance of mitochondrial osmotic stability and mitochondrial membrane permeability; phosphorylated
YNL055C	R.GAFDLC@LK.S	POR1	2.194	462.236	-0.09	Mitochondrial porin (voltage-dependent anion channel), outer membrane protein required for the maintenance of mitochondrial osmotic stability and mitochondrial membrane permeability; phosphorylated
YNL061W	R.ILLDAPC@SGTGVIGK.D	NOP2	3.623	750.908	-0.5	Probable RNA m(5)C methyltransferase, essential for processing and maturation of 27S pre-rRNA and large ribosomal subunit biogenesis; localized to the nucleolus; constituent of 66S pre-ribosomal particles
YNL061W	R.L]GCTNTIVC@NYDAR.E	NOP2	4.331	828.877	-0.51	Probable RNA m(5)C methyltransferase, essential for processing and maturation of 27S pre-rRNA and large ribosomal subunit biogenesis; localized to the nucleolus; constituent of 66S pre-ribosomal particles
YNL064C	K.KATVDEC@VLADFDPAK.Y	YDJ1	4.115	889.934	-1.04	Protein chaperone involved in regulation of the HSP90 and HSP70 functions; involved in protein translocation across membranes; member of the DnaJ family
YNL064C	K.QILC@KEC@EGR.G	YDJ1	2.686	431.541	-0.12	Protein chaperone involved in regulation of the HSP90 and HSP70 functions; involved in protein translocation across membranes; member of the DnaJ family
YNL064C	R.FQTECD#VC@HGTGDIIDPKDR.C	YDJ1	4.377	788.351	-0.34	Protein chaperone involved in regulation of the HSP90 and HSP70 functions; involved in protein translocation across membranes; member of the DnaJ family
YNL112W	K.AEGFD#KPTGIQCQGWPMALSGR.D	DBP2	4.738	802.716	0.27	Essential ATP-dependent RNA helicase of the DEAD-box protein family, involved in nonsense-mediated mRNA decay and rRNA processing
YNL112W	R.I]RNTCVYGGVPK.S	DBP2	2.704	455.244	0.71	Essential ATP-dependent RNA helicase of the DEAD-box protein family, involved in nonsense-mediated mRNA decay and rRNA processing
YNL134C	K.IGPQGALLGC@DAAGQIVK.L	YNL134C	4.931	884.475	-0.02	Putative protein of unknown function with similarity to dehydrogenases from other model organisms; green fluorescent protein (GFP)-fusion protein localizes to both the cytoplasm and nucleus and is induced by the DNA-damaging agent MMS
YNL135C	K.FDSSVDRGSPFQC@NIGVGQVIK.G	FPR1	4.431	804.065	-0.1	Peptidyl-prolyl cis-trans isomerase (PPIase), binds to the drugs FK506 and rapamycin; also binds to the nonhistone chromatin binding protein Hmo1p and may regulate its assembly or function
YNL135C	R.GSPFQC@NIGVGQVIK.G	FPR1	4.544	802.417	-0.22	Peptidyl-prolyl cis-trans isomerase (PPIase), binds to the drugs FK506 and rapamycin; also binds to the nonhistone chromatin binding protein Hmo1p and may regulate its assembly or function
YNL138W	K.NNKPSDSGADANTTNEPSAENAPEVEQDPK.C	SRV2	5.212	1042.8	-0.2	CAP (cyclase-associated protein) subunit of adenylyl cyclase complex; N-terminus binds adenylyl cyclase and facilitates activation by RAS; C-terminus binds ADP-actin monomers, facilitating regulation of actin dynamics and cell morphogenesis
YNL157W	R.I]STCPSTASTAGVVDNATLIQK.E	YNL157W	4.825	1117.57	-0.24	Hypothetical protein
YNL166C	R.LADQTPHDDNSENC@PNR.S	BNI5	3.358	991.916	-0.29	Protein involved in organization of septins at the mother-bud neck, may interact directly with the Cdc11p septin, localizes to bud neck in a septin-dependent manner
YNL209W	R.TFTTVSDNQTTVQFPVYQGERVNCK[.E	SSB2	3.579	973.803	-0.12	Cytoplasmic ATPase that is a ribosome-associated molecular chaperone, functions with J-protein partner Zuo1p; may be involved in the folding of newly-synthesized polypeptide chains; member of the HSP70 family; homolog of SSB1
YNL219C	R.YIDYC@LFEKPTETTN.-	ALG9	5.286	947.431	-2	Mannosyltransferase, involved in N-linked glycosylation; catalyzes the transfer of mannose from Dol-P-Man to lipid-linked oligosaccharides; mutation of the human ortholog causes type 1 congenital disorders of glycosylation
YNL241C	K.SEDGSKPAYVDDDTVDKDSK.C	ZWF1	5.126	724.324	-2.23	Glucose-6-phosphate dehydrogenase (G6PD), catalyzes the first step of the pentose phosphate pathway; involved in adapting to oxidatve stress; homolog of the human G6PD which is deficient in patients with hemolytic anemia
YNL244C	K.DFAC@NGNIVKDPEMGEIIQLQGDQR.A	SUI1	6.009	955.116	-0.27	Translation initiation factor eIF1; component of a complex involved in recognition of the initiator codon; modulates translation accuracy at the initiation phase
YNL287W	K.IILNSSC@LPVESTQFAPSDSNSHTLK.L	SEC21	4.535	949.14	0.13	Gamma subunit of coatomer, a heptameric protein complex that together with Arf1p forms the COPI coat; involved in ER to Golgi transport of selective cargo
YNL287W	R.LLPSEEAAC@YVAFK.K	SEC21	3.177	799.401	0.86	Gamma subunit of coatomer, a heptameric protein complex that together with Arf1p forms the COPI coat; involved in ER to Golgi transport of selective cargo
YNL301C	K.AGGEC@ITLDQLAVR.A	RPL18B	4.317	751.885	-0.17	Protein component of the large (60S) ribosomal subunit, identical to Rpl18Ap and has similarity to rat L18 ribosomal protein
YNR016C	K.GC@C@TSPEDGLQK.A	ACC1	3.658	676.284	-0.5	Acetyl-CoA carboxylase, biotin containing enzyme that catalyzes the carboxylation of acetyl-CoA to form malonyl-CoA; required for de novo biosynthesis of long-chain fatty acids
YNR016C	K.VPC@IPWSGTGVDTVHVDEK.T	ACC1	4.936	699.342	0.1	Acetyl-CoA carboxylase, biotin containing enzyme that catalyzes the carboxylation of acetyl-CoA to form malonyl-CoA; required for de novo biosynthesis of long-chain fatty acids
YNR034W	K.IYHIDESLINDPQEC@ADNYEK.I	SOL1	4.705	856.051	-0.55	Protein with a possible role in tRNA export; shows similarity to 6-phosphogluconolactonase non-catalytic domains but does not exhibit this enzymatic activity; homologous to Sol2p, Sol3p, and Sol4p
YNR046W	K.AC@DTSNDNFPLQYDGSK.C	TRM112	6.021	966.407	-0.61	Subunit of an adoMet-dependent tRNA methyltransferase (MTase) complex (Trm11p-Trm112p), required for the methylation of the guanosine nucleotide at position 10 (m2G10) in tRNAs; putative zinc binding subunit of other MTase-related proteins
YNR046W	K.FLTTNFLK.C	TRM112	2.479	492.282	0.31	Subunit of an adoMet-dependent tRNA methyltransferase (MTase) complex (Trm11p-Trm112p), required for the methylation of the guanosine nucleotide at position 10 (m2G10) in tRNAs; putative zinc binding subunit of other MTase-related proteins
YNR050C	R.GNALDTLC@AR.L	LYS9	3.282	545.769	-0.14	Saccharopine dehydrogenase (NADP+, L-glutamate-forming); catalyzes the formation of saccharopine from alpha-aminoadipate 6-semialdehyde, which is the seventh step in lysine biosynthesis pathway
YOL030W	R.QLAAEYFNCGD#EADAR.I	GAS5	4.452	915.391	-0.98	1,3-beta-glucanosyltransferase, has similarity to Gas1p; localizes to the cell wall
YOL038W	K.NYDRKEPPATVEECVK[.L	PRE6	4.207	645.647	-1.19	Alpha 4 subunit of the 20S proteasome; may replace alpha 3 subunit (Pre9p) under stress conditions to create a more active proteasomal isoform; GFP-fusion protein relocates from cytosol to the mitochondrial surface upon oxidative stress
YOL058W	R.LIYNGSYFTPEC@EYIR.S	ARG1	3.627	1012.98	0.8	Arginosuccinate synthetase, catalyzes the formation of L-argininosuccinate from citrulline and L-aspartate in the arginine biosynthesis pathway; potential Cdc28p substrate
YOL086C	K.C]C@SDVFNQVVK.S	ADH1	4.315	678.308	0.2	Alcohol dehydrogenase, fermentative isozyme active as homo- or heterotetramers; required for the reduction of acetaldehyde to ethanol, the last step in the glycolytic pathway
YOL086C	R.ANGTTVLVGMPAGAK.C	ADH1	3.904	701.871	-0.21	Alcohol dehydrogenase, fermentative isozyme active as homo- or heterotetramers; required for the reduction of acetaldehyde to ethanol, the last step in the glycolytic pathway
YOR021C	R.VC@LLDPR.A	YOR021C	2.104	436.737	0.3	Putative protein of unknown function; YOR021C is not an essential gene
YOR027W	K.KFSDALNDANEC@VK.I	STI1	5.116	805.877	-0.89	Hsp90 cochaperone, interacts with the Ssa group of the cytosolic Hsp70 chaperones; activates the ATPase activity of Ssa1p; homolog of mammalian Hop protein
YOR027W	K.LMSFPEAIADC@NK.A	STI1	4.38	756.347	-0.05	Hsp90 cochaperone, interacts with the Ssa group of the cytosolic Hsp70 chaperones; activates the ATPase activity of Ssa1p; homolog of mammalian Hop protein
YOR046C	R.VNPEDASPQAIC@LAPSR.E	DBP5	4.332	912.949	0.44	Cytoplasmic ATP-dependent RNA helicase of the DEAD-box family involved in mRNA export from the nucleus; involved in translation termination
YOR063W	K.GC@IPGNR.K	RPL3	1.589	387.19	0.03	Protein component of the large (60S) ribosomal subunit, has similarity to E. coli L3 and rat L3 ribosomal proteins; involved in the replication and maintenance of killer double stranded RNA virus
YOR063W	K.VAC@IGAWHPAHVMWSVAR.A	RPL3	2.298	512.758	-0.16	Protein component of the large (60S) ribosomal subunit, has similarity to E. coli L3 and rat L3 ribosomal proteins; involved in the replication and maintenance of killer double stranded RNA virus
YOR086C	K.YYINNEEDC@AYK.T	TCB1	3.655	791.329	-0.88	Lipid-binding protein containing three calcium and lipid binding domains; non-tagged protein localizes to mitochondria and GFP-fusion protein localizes to the cell periphery; C-termini of Tcb1p, Tcb2p and Tcb3p interact
YOR122C	R.HDAEGVVC@VR.T	PFY1	3.382	571.275	0.19	Profilin, actin- and phosphatidylinositol 4,5-bisphosphate-binding protein, involved in cytoskeleton organization, required for normal timing of actin polymerization in response to thermal stress; localizes to plasma membrane and cytosol
YOR128C	K.DNIC@DLC@YAPAR.V	ADE2	3.736	734.322	0.74	Phosphoribosylaminoimidazole carboxylase, catalyzes a step in the 'de novo' purine nucleotide biosynthetic pathway; red pigment accumulates in mutant cells deprived of adenine
YOR128C	K.GSC@LDGVDSLHSIVQMPR.G	ADE2	2.043	657.652	0.17	Phosphoribosylaminoimidazole carboxylase, catalyzes a step in the 'de novo' purine nucleotide biosynthetic pathway; red pigment accumulates in mutant cells deprived of adenine
YOR142W	R.LVGPNC@PGIINPATK.V	LSC1	2.988	775.922	-0.13	Alpha subunit of succinyl-CoA ligase, which is a mitochondrial enzyme of the TCA cycle that catalyzes the nucleotide-dependent conversion of succinyl-CoA to succinate; phosphorylated
YOR151C	K.N]CYLSEATESDLYK.L	RPB2	4.468	846.874	-0.27	RNA polymerase II second largest subunit B150, part of central core; similar to bacterial beta subunit
YOR151C	K.NC@YLSEATESDLYK.L	RPB2	4.128	846.874	-0.27	RNA polymerase II second largest subunit B150, part of central core; similar to bacterial beta subunit
YOR153W	K.TVYFGDLGEGC@K.T	PDR5	2.659	673.308	-0.07	Plasma membrane ATP-binding cassette (ABC) transporter, short-lived multidrug transporter actively regulated by Pdr1p; also involved in steroid transport, cation resistance, and cellular detoxification during exponential growth
YOR153W	K.YFEDMGYVC@PSR.Q	PDR5	3.925	770.315	-0.65	Plasma membrane ATP-binding cassette (ABC) transporter, short-lived multidrug transporter actively regulated by Pdr1p; also involved in steroid transport, cation resistance, and cellular detoxification during exponential growth
YOR163W	R.ETWEEAGC@IGK.I	DDP1	3.723	640.285	0.12	Polyphosphate phosphatase; hydrolyzes diphosphorylated inositol polyphosphates and diadenosine polyphosphates; has high specificity for diadenosine hexa- and pentaphosphates; member of the MutT family of nucleotide hydrolases
YOR184W	K.ILYEALDANSDFYNVPVDPK.C	SER1	5.206	1142.06	-0.46	3-phosphoserine aminotransferase, catalyzes the formation of phosphoserine from 3-phosphohydroxypyruvate, required for serine and glycine biosynthesis; regulated by the general control of amino acid biosynthesis mediated by Gcn4p
YOR204W	K.AC@VVYGGSPIGNQLR.E	DED1	4.672	795.906	-0.69	ATP-dependent DEAD (Asp-Glu-Ala-Asp)-box RNA helicase, required for translation initiation of all yeast mRNAs; mutations in human DEAD-box DBY are a frequent cause of male infertility
YOR204W	R.DLMAC@AQTGSGK.T	DED1	3.695	627.776	-0.36	ATP-dependent DEAD (Asp-Glu-Ala-Asp)-box RNA helicase, required for translation initiation of all yeast mRNAs; mutations in human DEAD-box DBY are a frequent cause of male infertility
YOR204W	R.GC@DLLVATPGR.L	DED1	3.85	579.8	-0.76	ATP-dependent DEAD (Asp-Glu-Ala-Asp)-box RNA helicase, required for translation initiation of all yeast mRNAs; mutations in human DEAD-box DBY are a frequent cause of male infertility
YOR204W	R.HIVEDC@DMTPVGER.Q	DED1	4.278	837.367	0.38	ATP-dependent DEAD (Asp-Glu-Ala-Asp)-box RNA helicase, required for translation initiation of all yeast mRNAs; mutations in human DEAD-box DBY are a frequent cause of male infertility
YOR209C	K.IIC@YSDSLNVEK.A	NPT1	3.771	720.856	0.33	Nicotinate phosphoribosyltransferase, acts in the salvage pathway of NAD+ biosynthesis; required for silencing at rDNA and telomeres and has a role in silencing at mating-type loci; localized to the nucleus
YOR220W	R.SNAASC@TENDVNATASNPPK.S	YOR220W	6.263	1024.45	0.01	Protein of unknown function; green fluorescent protein (GFP)-fusion protein localizes to the cytoplasm and is induced in response to the DNA-damaging agent MMS
YOR230W	R.FFDNHIFASC@SDDNILR.F	WTM1	4.98	690.983	-0.04	Transcriptional modulator involved in regulation of meiosis, silencing, and expression of RNR genes; required for nuclear localization of the ribonucleotide reductase small subunit Rnr2p and Rnr4p; contains WD repeats
YOR276W	K.VTTDSDGWC@TFEAK.K	CAF20	4.419	808.849	0.02	Phosphoprotein of the mRNA cap-binding complex involved in translational control, repressor of cap-dependent translation initiation, competes with eIF4G for binding to eIF4E
YOR283W	K.EVPYYC@DNDDNNIIR.L	YOR283W	3.499	950.412	-0.24	Putative protein of unknown function with some similarity to GPM1/YKL152C, a phosphoglycerate mutase; YOR283W is not an essential gene
YOR323C	K.TNYPAGC@NAMETLLINPK.F	PRO2	3.946	1003.99	0.77	Gamma-glutamyl phosphate reductase, catalyzes the second step in proline biosynthesis
YOR335C	K.DNFWEMGDQGPC@GPC@SEIHYDR.I	ALA1	5.321	896.017	-0.79	Cytoplasmic alanyl-tRNA synthetase, required for protein synthesis; point mutation (cdc64-1 allele) causes cell cycle arrest at G1; lethality of null mutation is functionally complemented by human homolog
YOR335C	K.TC@FYAEQGGQEYDTGK.I	ALA1	5.123	927.386	-0.21	Cytoplasmic alanyl-tRNA synthetase, required for protein synthesis; point mutation (cdc64-1 allele) causes cell cycle arrest at G1; lethality of null mutation is functionally complemented by human homolog
YOR335C	R.VAHGC@YISNAALAK.G	ALA1	4.334	737.878	1.12	Cytoplasmic alanyl-tRNA synthetase, required for protein synthesis; point mutation (cdc64-1 allele) causes cell cycle arrest at G1; lethality of null mutation is functionally complemented by human homolog
YOR347C	K.KLIAKC@NLAGKPVICATQMLDSM@THNPRPTR.A	PYK2	3.263	882.706	-0.04	Pyruvate kinase that appears to be modulated by phosphorylation; PYK2 transcription is repressed by glucose, and Pyk2p may be active under low glycolytic flux
YOR361C	K.TQFSNLQIC@R.L	PRT1	3.305	633.817	0.21	Subunit of the core complex of translation initiation factor 3(eIF3), essential for translation; part of a subcomplex (Prt1p-Rpg1p-Nip1p) that stimulates binding of mRNA and tRNA(i)Met to ribosomes
YOR375C	K.R]IMINCFNEC@IDYAK.K	GDH1	3.055	654.967	-0.51	NADP(+)-dependent glutamate dehydrogenase, synthesizes glutamate from ammonia and alpha-ketoglutarate; rate of alpha-ketoglutarate utilization differs from Gdh3p; expression regulated by nitrogen and carbon sources
YOR375C	K.VDIALPC@ATQNEVSGEEAK.A	GDH1	4.608	1015.99	-0.5	NADP(+)-dependent glutamate dehydrogenase, synthesizes glutamate from ammonia and alpha-ketoglutarate; rate of alpha-ketoglutarate utilization differs from Gdh3p; expression regulated by nitrogen and carbon sources
YOR375C	R.IMINC@FNEC@IDYAK.K	GDH1	4.422	903.896	-0.27	NADP(+)-dependent glutamate dehydrogenase, synthesizes glutamate from ammonia and alpha-ketoglutarate; rate of alpha-ketoglutarate utilization differs from Gdh3p; expression regulated by nitrogen and carbon sources
YPL028W	K.AIILGAQSIK.C	ERG10	2.925	507.321	-0.13	Acetyl-CoA C-acetyltransferase (acetoacetyl-CoA thiolase), cytosolic enzyme that transfers an acetyl group from one acetyl-CoA molecule to another, forming acetoacetyl-CoA; involved in the first step in mevalonate biosynthesis
YPL028W	K.C@GNADVVVAGGC@ESMTNAPYYMPAAR.A	ERG10	3.464	926.397	-0.6	Acetyl-CoA C-acetyltransferase (acetoacetyl-CoA thiolase), cytosolic enzyme that transfers an acetyl group from one acetyl-CoA molecule to another, forming acetoacetyl-CoA; involved in the first step in mevalonate biosynthesis
YPL028W	K.VNVYGGAVALGHPLGC@SGAR.V	ERG10	4.551	977.999	-0.55	Acetyl-CoA C-acetyltransferase (acetoacetyl-CoA thiolase), cytosolic enzyme that transfers an acetyl group from one acetyl-CoA molecule to another, forming acetoacetyl-CoA; involved in the first step in mevalonate biosynthesis
YPL028W	R.DGLNDAYDGLAMGVHAEK.C	ERG10	3.501	625.957	0.43	Acetyl-CoA C-acetyltransferase (acetoacetyl-CoA thiolase), cytosolic enzyme that transfers an acetyl group from one acetyl-CoA molecule to another, forming acetoacetyl-CoA; involved in the first step in mevalonate biosynthesis
YPL061W	K.NAGQIC@SSGSR.I	ALD6	3.502	568.759	-0.11	Cytosolic aldehyde dehydrogenase, activated by Mg2+ and utilizes NADP+ as the preferred coenzyme; required for conversion of acetaldehyde to acetate; constitutively expressed; locates to the mitochondrial outer surface upon oxidative stress
YPL093W	R.TLLICGY#PNVGK.S	NOG1	3.24	667.86	-0.46	Putative GTPase that associates with free 60S ribosomal subunits in the nucleolus and is required for 60S ribosomal subunit biogenesis; constituent of 66S pre-ribosomal particles; member of the ODN family of nucleolar G-proteins
YPL106C	K.ANITDVC@IAVPPWYTEEQRYNIADAAR.I	SSE1	3.133	1046.18	-1.19	ATPase that is a component of the heat shock protein Hsp90 chaperone complex; binds unfolded proteins; member of the heat shock protein 70 (HSP70) family; localized to the cytoplasm
YPL111W	K.AVHPETNGEGPIMCSY#DVDGVDPLYIPATGTPVR.G	CAR1	3.948	1215.24	-1.61	Arginase, responsible for arginine degradation, expression responds to both induction by arginine and nitrogen catabolite repression; disruption enhances freeze tolerance
YPL127C	K.C@VENGELVQPK.G	HHO1	3.495	636.816	-0.5	Histone H1, a linker histone required for nucleosome packaging at restricted sites; suppresses DNA repair involving homologous recombination; not required for telomeric silencing, basal transcriptional repression, or efficient sporulation
YPL160W	K.GTGVVTC@VPSNSPDDYITTK.D	CDC60	4.572	1056	-0.53	Cytosolic leucyl tRNA synthetase, ligates leucine to the appropriate tRNA
YPL226W	K.IPEC@QSITDC@K.N	NEW1	3.594	675.805	0.53	ATP binding cassette family member; Asn/Gln-rich rich region supports [NU+] prion formation, susceptibility to [PSI+] prion induction and aggregation of a fragment of the human Machado-Joseph Disease protein
YPL231W	K.TLGEQLIENC@K.Q	FAS2	4.201	652.829	0.08	Alpha subunit of fatty acid synthetase, which catalyzes the synthesis of long-chain saturated fatty acids; contains beta-ketoacyl reductase and beta-ketoacyl synthase activities; phosphorylated
YPL231W	R.EILC@YSK.D	FAS2	2.058	456.728	-0.4	Alpha subunit of fatty acid synthetase, which catalyzes the synthesis of long-chain saturated fatty acids; contains beta-ketoacyl reductase and beta-ketoacyl synthase activities; phosphorylated
YPL231W	R.NFTPQEIEYC@SAQPSVQSSFAGTWSAK.E	FAS2	6.314	1007.46	-1.41	Alpha subunit of fatty acid synthetase, which catalyzes the synthesis of long-chain saturated fatty acids; contains beta-ketoacyl reductase and beta-ketoacyl synthase activities; phosphorylated
YPR024W	K.DNTTSGC@GSDLQSATGTAR.A	YME1	4.867	949.91	-0.58	Subunit, with Mgr1p, of the mitochondrial inner membrane i-AAA protease complex, which is responsible for degradation of unfolded or misfolded mitochondrial gene products; mutation causes an elevated rate of mitochondrial turnover
YPR033C	K.LIYNLEDQGGELC@SLR.Y	HTS1	4.558	940.464	-0.51	Cytoplasmic and mitochondrial histidine tRNA synthetase; encoded by a single nuclear gene that specifies two messages; efficient mitochondrial localization requires both a presequence and an amino-terminal sequence
YPR035W	K.GDWNGAGCH#TNVSTK.E	GLN1	3.382	802.349	-0.3	Glutamine synthetase (GS), synthesizes glutamine from glutamate and ammonia; with Glt1p, forms the secondary pathway for glutamate biosynthesis from ammonia; expression regulated by nitrogen source and by amino acid limitation
YPR035W	K.GGYPAPQGPYYC@GVGAGK.V	GLN1	4.198	899.914	-0.02	Glutamine synthetase (GS), synthesizes glutamine from glutamate and ammonia; with Glt1p, forms the secondary pathway for glutamate biosynthesis from ammonia; expression regulated by nitrogen source and by amino acid limitation
YPR060C	R.DIEC@LQSLSR.R	ARO7	3.147	610.801	-0.2	Chorismate mutase, catalyzes the conversion of chorismate to prephenate to initiate the tyrosine/phenylalanine-specific branch of aromatic amino acid biosynthesis
YPR062W	K.EGGVPIGGC@LINNK.D	FCY1	4.091	714.369	0.11	Cytosine deaminase, zinc metalloenzyme that catalyzes the hydrolytic deamination of cytosine to uracil; of biomedical interest because it also catalyzes the deamination of 5-fluorocytosine (5FC) to form anticancer drug 5-fluorouracil (5FU)
YPR062W	R.C]VVGENVNFK.S	FCY1	3.231	583.287	0.32	Cytosine deaminase, zinc metalloenzyme that catalyzes the hydrolytic deamination of cytosine to uracil; of biomedical interest because it also catalyzes the deamination of 5-fluorocytosine (5FC) to form anticancer drug 5-fluorouracil (5FU)
YPR145W	K.C@LTDDC@DTITAFPPGHVYDSK.T	ASN1	3.349	804.687	-0.6	Asparagine synthetase, isozyme of Asn2p; catalyzes the synthesis of L-asparagine from L-aspartate in the asparagine biosynthetic pathway
YPR145W	K.C]LTDDC@DTITAFPPGHVYDSK.T	ASN1	4.012	804.687	-0.8	Asparagine synthetase, isozyme of Asn2p; catalyzes the synthesis of L-asparagine from L-aspartate in the asparagine biosynthetic pathway
YPR145W	K.TVYFASELK.C	ASN1	2.158	529.282	-0.33	Asparagine synthetase, isozyme of Asn2p; catalyzes the synthesis of L-asparagine from L-aspartate in the asparagine biosynthetic pathway
YPR181C	K.EYDELNVAPYNPVVC@SGPHC@K.S	SEC23	3.896	816.704	0.17	GTPase-activating protein; component of the Sec23p-Sec24p heterodimeric complex of the COPII vesicle coat, involved in ER to Golgi transport and autophagy; stimulates the GDP-bound form of Sar1p
YPR181C	K.SILNPYC@VIDPR.N	SEC23	3.155	723.874	-0.45	GTPase-activating protein; component of the Sec23p-Sec24p heterodimeric complex of the COPII vesicle coat, involved in ER to Golgi transport and autophagy; stimulates the GDP-bound form of Sar1p
YPR181C	R.NSSWSC@PIC@NSR.N	SEC23	3.169	734.309	-0.14	GTPase-activating protein; component of the Sec23p-Sec24p heterodimeric complex of the COPII vesicle coat, involved in ER to Golgi transport and autophagy; stimulates the GDP-bound form of Sar1p
YPR181C	R.SDANSNVVPVGC@LYTPLK.E	SEC23	3.953	967.489	0.56	GTPase-activating protein; component of the Sec23p-Sec24p heterodimeric complex of the COPII vesicle coat, involved in ER to Golgi transport and autophagy; stimulates the GDP-bound form of Sar1p
YPR183W	K.YLENC@NPR.D	DPM1	2.769	533.243	0.34	Dolichol phosphate mannose (Dol-P-Man) synthase of the ER membrane, catalyzes the formation of Dol-P-Man from Dol-P and GDP-Man; required for glycosyl phosphatidylinositol membrane anchoring, O mannosylation, and protein glycosylation
YPR184W	R.LSDTGEPITSC@SYGK.G	GDB1	4.77	807.869	-0.41	Glycogen debranching enzyme containing glucanotranferase and alpha-1,6-amyloglucosidase activities, required for glycogen degradation; phosphorylated in mitochondria
YPR191W	R.YDYAVAEQC@PVK.S	QCR2	4.663	721.834	-0.42	Subunit 2 of the ubiquinol cytochrome-c reductase complex, which is a component of the mitochondrial inner membrane electron transport chain; phosphorylated; transcription is regulated by Hap1p, Hap2p/Hap3p, and heme

## Sheet: Expt. 3
Table S2(C). Peptides containing cysteine identified from the third experiment with the reduction/alkylation, but without the enrichment
Reference	Peptide	Gene symbol	XCorr	Obs m/z	PPM	Annotation
YAL005C	R.ARFEELC@ADLFR.S	SSA1	3.74	763.875	0.03	ATPase involved in protein folding and nuclear localization signal (NLS)-directed nuclear transport; member of heat shock protein 70 (HSP70) family; forms a chaperone complex with Ydj1p; localized to the nucleus, cytoplasm, and cell wall
YAL005C	R.FEELC@ADLFR.S	SSA1	3.639	650.305	-0.49	ATPase involved in protein folding and nuclear localization signal (NLS)-directed nuclear transport; member of heat shock protein 70 (HSP70) family; forms a chaperone complex with Ydj1p; localized to the nucleus, cytoplasm, and cell wall
YAL016W	K.SLAEC@QELLKN.-	TPD3	3.701	652.83	1.1	Regulatory subunit A of the heterotrimeric protein phosphatase 2A, which also contains regulatory subunit Cdc55p and either catalytic subunit Pph21p or Pph22p; required for cell morphogenesis and for transcription by RNA polymerase III
YAL023C	K.NQALGGSLLHSHIQTYPDGSNQQQVTC@YGYK.D	PMT2	4.95	1155.55	2.01	Protein O-mannosyltransferase, transfers mannose residues from dolichyl phosphate-D-mannose to protein serine/threonine residues; acts in a complex with Pmt1p, can instead interact with Pmt5p in some conditions; target for new antifungals
YAL035W	R.SPIC@C@ILGHVDTGK.T	FUN12	2.651	519.59	-0.04	GTPase, required for general translation initiation by promoting Met-tRNAiMet binding to ribosomes and ribosomal subunit joining; homolog of bacterial IF2
YAL038W	K.A]CDDKIMYVDYK.N	CDC19	4.12	760.841	-0.93	Pyruvate kinase, functions as a homotetramer in glycolysis to convert phosphoenolpyruvate to pyruvate, the input for aerobic (TCA cycle) or anaerobic (glucose fermentation) respiration
YAL038W	K.SNLAGKPVIC@ATQMLESMTYNPRPTR.A	CDC19	2.565	989.821	-0.23	Pyruvate kinase, functions as a homotetramer in glycolysis to convert phosphoenolpyruvate to pyruvate, the input for aerobic (TCA cycle) or anaerobic (glucose fermentation) respiration
YAL038W	K.SNLAGKPVICATQMLE#SMTYNPRPTR.A	CDC19	2.545	738.619	0.19	Pyruvate kinase, functions as a homotetramer in glycolysis to convert phosphoenolpyruvate to pyruvate, the input for aerobic (TCA cycle) or anaerobic (glucose fermentation) respiration
YAL038W	K.YRPNC@PIILVTR.C	CDC19	3.112	751.419	0.25	Pyruvate kinase, functions as a homotetramer in glycolysis to convert phosphoenolpyruvate to pyruvate, the input for aerobic (TCA cycle) or anaerobic (glucose fermentation) respiration
YAL042W	K.VC@C@QD#CDAVR.S	ERV46	2.994	641.752	-0.24	Protein localized to COPII-coated vesicles, forms a complex with Erv41p; involved in the membrane fusion stage of transport
YAL060W	K.FYNSKPC@DAC@QR.G	BDH1	2.994	773.332	-0.64	NAD-dependent (R,R)-butanediol dehydrogenase, catalyzes oxidation of (R,R)-2,3-butanediol to (3R)-acetoin, oxidation of meso-butanediol to (3S)-acetoin, and reduction of acetoin; enhances use of 2,3-butanediol as an aerobic carbon source
YAL062W	K.GGLC@VDLK.G	GDH3	2.607	431.228	-0.44	NADP(+)-dependent glutamate dehydrogenase, synthesizes glutamate from ammonia and alpha-ketoglutarate; rate of alpha-ketoglutarate utilization differs from Gdh1p; expression regulated by nitrogen and carbon sources
YAL062W	R.IC@YAFMR.E	GDH3	2.575	480.725	0	NADP(+)-dependent glutamate dehydrogenase, synthesizes glutamate from ammonia and alpha-ketoglutarate; rate of alpha-ketoglutarate utilization differs from Gdh1p; expression regulated by nitrogen and carbon sources
YAR007C	K.VLEQPDGTWR.C	RFA1	3.382	600.804	0.25	Subunit of heterotrimeric Replication Protein A (RPA), which is a highly conserved single-stranded DNA binding protein involved in DNA replication, repair, and recombination
YAR010C	K.EVHTNQDPLDVSASKTEECE#K.A	YAR010C	4.71	806.036	-0.03	Retrotransposon TYA Gag gene co-transcribed with TYB Pol; in YARCTY1-1 TYB is mutant and probably non-functional
YAR010C	K.VAC@QLIMR.G	YAR010C	2.949	503.762	-0.01	Retrotransposon TYA Gag gene co-transcribed with TYB Pol; in YARCTY1-1 TYB is mutant and probably non-functional
YBL005W-A	K.EVQTTQDPLDISASKTEEC@EK.V	YBL005W-A	3.351	1204.56	0.3	Retrotransposon TYA Gag gene co-transcribed with TYB Pol; translated as TYA or TYA-TYB polyprotein; Gag is a nucleocapsid protein that is the structural constituent of virus-like particles (VLPs); similar to retroviral Gag
YBL024W	K.TC@QAPLPLTFR.I	NCL1	2.915	652.344	-1	S-adenosyl-L-methionine-dependent tRNA: m5C-methyltransferase, methylates cytosine to m5C at several positions in tRNAs and intron-containing pre-tRNAs; similar to Nop2p and human proliferation associated nucleolar protein p120
YBL024W	R.LVNC@DDKLPGLIR.S	NCL1	3.014	504.945	0.39	S-adenosyl-L-methionine-dependent tRNA: m5C-methyltransferase, methylates cytosine to m5C at several positions in tRNAs and intron-containing pre-tRNAs; similar to Nop2p and human proliferation associated nucleolar protein p120
YBL030C	K.YAGILDCFKR[.T	PET9	1.648	414.882	0.06	Major ADP/ATP carrier of the mitochondrial inner membrane, exchanges cytosolic ADP for mitochondrially synthesized ATP; phosphorylated; required for viability in many common lab strains carrying a mutation in the polymorphic SAL1 gene
YBL050W	K.AGNEDEAGNTYVEAYK.C	SEC17	5.288	865.879	-0.29	Peripheral membrane protein required for vesicular transport between ER and Golgi and for the 'priming' step in homotypic vacuole fusion, part of the cis-SNARE complex; has similarity to alpha-SNAP
YBL050W	K.KAGNEDEAGNTYVEAYK.C	SEC17	5.197	929.927	0.74	Peripheral membrane protein required for vesicular transport between ER and Golgi and for the 'priming' step in homotypic vacuole fusion, part of the cis-SNARE complex; has similarity to alpha-SNAP
YBL058W	K.AINTEHVGGLC@PKPGSSQGSNEYLK.R	SHP1	2.526	661.576	0.36	UBX (ubiquitin regulatory X) domain-containing protein that regulates Glc7p phosphatase activity and interacts with Cdc48p; interacts with ubiquitylated proteins in vivo and is required for degradation of a ubiquitylated model substrate
YBL068W	K.S]CLLVDDMADTCGTLVK#.A	PRS4	3.787	957.437	0.44	5-phospho-ribosyl-1(alpha)-pyrophosphate synthetase, synthesizes PRPP, which is required for nucleotide, histidine, and tryptophan biosynthesis; one of five related enzymes, which are active as heteromultimeric complexes
YBL076C	K.YGLENYNNE#CR.S	ILS1	3.49	716.301	-0.62	Cytoplasmic isoleucine-tRNA synthetase, target of the G1-specific inhibitor reveromycin A
YBL076C	R.VISDDYVTSDSGTGIVHNAPAFGEEDNAAC@LK.N	ILS1	6.244	1118.18	-0.56	Cytoplasmic isoleucine-tRNA synthetase, target of the G1-specific inhibitor reveromycin A
YBL087C	K.E#CADLWPR.V	RPL23A	2.505	523.74	0.54	Protein component of the large (60S) ribosomal subunit, identical to Rpl23Bp and has similarity to E. coli L14 and rat L23 ribosomal proteins
YBL087C	K.EC@ADLWPR.V	RPL23A	2.768	523.74	0.31	Protein component of the large (60S) ribosomal subunit, identical to Rpl23Bp and has similarity to E. coli L14 and rat L23 ribosomal proteins
YBL087C	R.ISLGLPVGAIMNC@ADNSGAR.N	RPL23A	3.909	678.003	0.21	Protein component of the large (60S) ribosomal subunit, identical to Rpl23Bp and has similarity to E. coli L14 and rat L23 ribosomal proteins
YBR011C	R.NC@FPHHGYIHNYGAFPQTWEDPNVSHPETK.A	IPP1	5.611	895.653	-0.46	Cytoplasmic inorganic pyrophosphatase (PPase), catalyzes the rapid exchange of oxygens from Pi with water, highly expressed and essential for viability, active-site residues show identity to those from E. coli PPase
YBR025C	K.STFFQAITR.C	OLA1	3.034	535.785	0.7	P-loop ATPase with similarity to human OLA1 and bacterial YchF; identified as specifically interacting with the proteasome; protein levels are induced by hydrogen peroxide
YBR025C	R.C@PLGNPANYPFATIDPEEAR.V	OLA1	5.458	1116.52	-0.52	P-loop ATPase with similarity to human OLA1 and bacterial YchF; identified as specifically interacting with the proteasome; protein levels are induced by hydrogen peroxide
YBR031W	R.SGQGAFGNMC@R.G	RPL4A	2.614	600.748	0.1	N-terminally acetylated protein component of the large (60S) ribosomal subunit, nearly identical to Rpl4Bp and has similarity to E. coli L4 and rat L4 ribosomal proteins
YBR048W	K.C@PFTGLVSIR.G	RPS11B	3.139	575.308	0.31	Protein component of the small (40S) ribosomal subunit; identical to Rps11Ap and has similarity to E. coli S17 and rat S11 ribosomal proteins
YBR048W	K.KC@PFTGLVSIR.G	RPS11B	3.79	426.573	0.85	Protein component of the small (40S) ribosomal subunit; identical to Rps11Ap and has similarity to E. coli S17 and rat S11 ribosomal proteins
YBR048W	K.TAIEGSYIDKK.C	RPS11B	2.913	612.827	-0.05	Protein component of the small (40S) ribosomal subunit; identical to Rps11Ap and has similarity to E. coli S17 and rat S11 ribosomal proteins
YBR048W	R.VQVGDIVTVGQC@RPISK.T	RPS11B	1.536	619.34	0.34	Protein component of the small (40S) ribosomal subunit; identical to Rps11Ap and has similarity to E. coli S17 and rat S11 ribosomal proteins
YBR058C	K.AYFEGQTIEFK.C	UBP14	3.727	666.827	0.26	Ubiquitin-specific protease that specifically disassembles unanchored ubiquitin chains; involved in fructose-1,6-bisphosphatase (Fbp1p) degradation; similar to human isopeptidase T
YBR096W	K.DALEYC@GLYNEK.V	YBR096W	4.115	737.829	-0.58	Putative protein of unknown function; green fluorescent protein (GFP)-fusion protein localizes to the ER
YBR102C	R.ANINDLNEVLDQC@TK.I	EXO84	3.993	873.921	1.52	Essential protein with dual roles in spliceosome assembly and exocytosis; the exocyst complex (Sec3p, Sec5p, Sec6p, Sec8p, Sec10p, Sec15p, Exo70p, and Exo84p) mediates polarized targeting of secretory vesicles to active sites of exocytosis
YBR115C	R.GC@IVRPGYVTGASANGSSNTDDFLLR.F	LYS2	6.892	909.776	-0.32	Alpha aminoadipate reductase, catalyzes the reduction of alpha-aminoadipate to alpha-aminoadipate 6-semialdehyde, which is the fifth step in biosynthesis of lysine; activation requires posttranslational phosphopantetheinylation by Lys5p
YBR115C	R.T]CVVETPTLNSDK.S	LYS2	3.718	732.355	-1.2	Alpha aminoadipate reductase, catalyzes the reduction of alpha-aminoadipate to alpha-aminoadipate 6-semialdehyde, which is the fifth step in biosynthesis of lysine; activation requires posttranslational phosphopantetheinylation by Lys5p
YBR118W	K.FVPSK#PMC@VEAFSEYPPLGR.F	TEF2	3.207	790.054	0.42	Translational elongation factor EF-1 alpha; also encoded by TEF1; functions in the binding reaction of aminoacyl-tRNA (AA-tRNA) to ribosomes
YBR118W	K.FVPSK#PMCVEAFSEYPPLGR.F	TEF2	2.904	771.046	-0.18	Translational elongation factor EF-1 alpha; also encoded by TEF1; functions in the binding reaction of aminoacyl-tRNA (AA-tRNA) to ribosomes
YBR118W	K.FVPSKPMC@VEAFSEYPPLGR.F	TEF2	2.89	776.379	0.74	Translational elongation factor EF-1 alpha; also encoded by TEF1; functions in the binding reaction of aminoacyl-tRNA (AA-tRNA) to ribosomes
YBR118W	K.FVPSKPMCVE#AFSEYPPLGR.F	TEF2	3.308	776.378	0.13	Translational elongation factor EF-1 alpha; also encoded by TEF1; functions in the binding reaction of aminoacyl-tRNA (AA-tRNA) to ribosomes
YBR118W	R.GNVC@GDAKNDPPK.G	TEF2	2.385	686.32	-0.08	Translational elongation factor EF-1 alpha; also encoded by TEF1; functions in the binding reaction of aminoacyl-tRNA (AA-tRNA) to ribosomes
YBR118W	R.RGNVCGD#AKNDPPK.G	TEF2	2.136	509.916	-0.05	Translational elongation factor EF-1 alpha; also encoded by TEF1; functions in the binding reaction of aminoacyl-tRNA (AA-tRNA) to ribosomes
YBR121C	K.TSYGWIE#CVGC@ADR.S	GRS1	4.429	837.356	0.27	Cytoplasmic and mitochondrial glycyl-tRNA synthase that ligates glycine to the cognate anticodon bearing tRNA; transcription termination factor that may interact with the 3'-end of pre-mRNA to promote 3'-end formation
YBR127C	K.IPIFSASGLPHNEIAAQICR[.Q	VMA2	3.174	732.053	0.18	Subunit B of the eight-subunit V1 peripheral membrane domain of the vacuolar H+-ATPase (V-ATPase), an electrogenic proton pump found throughout the endomembrane system; contains nucleotide binding sites; also detected in the cytoplasm
YBR127C	R.GQKIPIFSASGLPHNEIAAQICR[.Q	VMA2	2.584	836.444	-0.24	Subunit B of the eight-subunit V1 peripheral membrane domain of the vacuolar H+-ATPase (V-ATPase), an electrogenic proton pump found throughout the endomembrane system; contains nucleotide binding sites; also detected in the cytoplasm
YBR139W	K.GGYHPVLSSEEC@EK.M	YBR139W	3.352	796.356	-0.52	Putative serine type carboxypeptidase with a role in phytochelatin synthesis; green fluorescent protein (GFP)-fusion protein localizes to the vacuole; expression induced by nitrogen limitation in a GLN3, GAT1-independent manner
YBR151W	K.TLNC@AVSSLPK.D	APD1	3.572	595.316	-0.22	Protein of unknown function, required for normal localization of actin patches and for normal tolerance of sodium ions and hydrogen peroxide; localizes to both cytoplasm and nucleus
YBR162C	R.TLQYGDASC@SC@WK.T	TOS1	4.32	788.332	0.53	Covalently-bound cell wall protein of unknown function; identified as a cell cycle regulated SBF target gene; deletion mutants are highly resistant to treatment with beta-1,3-glucanase; has sequence similarity to YJL171C
YBR191W	K.C]RQEFLER.V	RPL21A	3.295	379.854	-0.08	Protein component of the large (60S) ribosomal subunit, nearly identical to Rpl21Bp and has similarity to rat L21 ribosomal protein
YBR208C	R.GLPTTAAC@PSFAYEPSK.D	DUR1	3.533	898.931	1.02	Urea amidolyase, contains both urea carboxylase and allophanate hydrolase activities, degrades urea to CO2 and NH3; expression sensitive to nitrogen catabolite repression and induced by allophanate, an intermediate in allantoin degradation
YBR218C	R.FGDIDEC@DVASYNMYPR.V	PYC2	4.497	1034.42	0.17	Pyruvate carboxylase isoform, cytoplasmic enzyme that converts pyruvate to oxaloacetate; highly similar to isoform Pyc1p but differentially regulated; mutations in the human homolog are associated with lactic acidosis
YBR218C	R.LDGGNAYAGATISPHYDSMLVK.C	PYC2	3.656	766.035	-0.54	Pyruvate carboxylase isoform, cytoplasmic enzyme that converts pyruvate to oxaloacetate; highly similar to isoform Pyc1p but differentially regulated; mutations in the human homolog are associated with lactic acidosis
YBR218C	R.TAFGNGTC@FVER.F	PYC2	3.021	679.811	-0.35	Pyruvate carboxylase isoform, cytoplasmic enzyme that converts pyruvate to oxaloacetate; highly similar to isoform Pyc1p but differentially regulated; mutations in the human homolog are associated with lactic acidosis
YBR234C	K.APIYSHC@FSQDK.S	ARC40	2.197	484.891	0.5	Subunit of the ARP2/3 complex, which is required for the motility and integrity of cortical actin patches
YBR234C	K.SILAVTC@ETDC@LVYR.V	ARC40	4.983	900.438	0.82	Subunit of the ARP2/3 complex, which is required for the motility and integrity of cortical actin patches
YBR244W	K.C@GFTPQYK.E	GPX2	3.071	500.731	-0.01	Phospholipid hydroperoxide glutathione peroxidase induced by glucose starvation that protects cells from phospholipid hydroperoxides and nonphospholipid peroxides during oxidative stress
YBR263W	K.LC@NESSEVAALSGEISK.W	SHM1	5.701	897.433	-0.01	Mitochondrial serine hydroxymethyltransferase, converts serine to glycine plus 5,10 methylenetetrahydrofolate; involved in generating precursors for purine, pyrimidine, amino acid, and lipid biosynthesis; reverse reaction generates serine
YBR286W	K.LVEIPNLGC@EEK.D	APE3	3.599	700.858	0.1	Vacuolar aminopeptidase Y, processed to mature form by Prb1p
YCL009C	K.LVEPFGVLEC@AR.S	ILV6	3.629	695.364	0.2	Regulatory subunit of acetolactate synthase, which catalyzes the first step of branched-chain amino acid biosynthesis; enhances activity of the Ilv2p catalytic subunit, localizes to mitochondria
YCL009C	R.K#QHVLNCLVQNEPGVLSR.V	ILV6	4.357	697.709	0	Regulatory subunit of acetolactate synthase, which catalyzes the first step of branched-chain amino acid biosynthesis; enhances activity of the Ilv2p catalytic subunit, localizes to mitochondria
YCL009C	R.KQH#VLNCLVQNEPGVLSR.V	ILV6	5.285	697.709	0	Regulatory subunit of acetolactate synthase, which catalyzes the first step of branched-chain amino acid biosynthesis; enhances activity of the Ilv2p catalytic subunit, localizes to mitochondria
YCL030C	K.FHAAQLPTETLEVETQPGVLC@SR.F	HIS4	4.673	861.768	0.91	Multifunctional enzyme containing phosphoribosyl-ATP pyrophosphatase, phosphoribosyl-AMP cyclohydrolase, and histidinol dehydrogenase activities; catalyzes the second, third, ninth and tenth steps in histidine biosynthesis
YCL030C	K.LVDNAGSVFVGAYTPESCGD#YSSGTNHTLPTYGYAR.Q	HIS4	3.364	1276.25	-0.42	Multifunctional enzyme containing phosphoribosyl-ATP pyrophosphatase, phosphoribosyl-AMP cyclohydrolase, and histidinol dehydrogenase activities; catalyzes the second, third, ninth and tenth steps in histidine biosynthesis
YCL030C	R.KFHAAQLPTETLEVETQPGVLC@SR.F	HIS4	2.773	678.601	-0.24	Multifunctional enzyme containing phosphoribosyl-ATP pyrophosphatase, phosphoribosyl-AMP cyclohydrolase, and histidinol dehydrogenase activities; catalyzes the second, third, ninth and tenth steps in histidine biosynthesis
YCL033C	R.VEIC@C@AR.C	YCL033C	2.313	454.21	0.63	Putative protein-methionine-R-oxide reductase; involved in response to oxidative stress; similar to mouse Sepx1p and fly SelRp; YCL033C is not an essential gene
YCL050C	K.EWIC@VVPR.S	APA1	2.451	529.776	0.21	Diadenosine 5',5''-P1,P4-tetraphosphate phosphorylase I (AP4A phosphorylase), involved in catabolism of bis(5'-nucleosidyl) tetraphosphates; has similarity to Apa2p
YCL050C	K.LLC@ALDNEESDKR.H	APA1	4.62	781.878	0.99	Diadenosine 5',5''-P1,P4-tetraphosphate phosphorylase I (AP4A phosphorylase), involved in catabolism of bis(5'-nucleosidyl) tetraphosphates; has similarity to Apa2p
YCR012W	K.DVTFLNDC@VGPEVEAAVK.A	PGK1	5.599	981.976	-1.19	3-phosphoglycerate kinase, catalyzes transfer of high-energy phosphoryl groups from the acyl phosphate of 1,3-bisphosphoglycerate to ADP to produce ATP; key enzyme in glycolysis and gluconeogenesis
YCR031C	K.ADRDESSPYAAMLAAQDVAAK.C	RPS14A	5.396	732.68	0.17	Ribosomal protein 59 of the small subunit, required for ribosome assembly and 20S pre-rRNA processing; mutations confer cryptopleurine resistance; nearly identical to Rps14Bp and similar to E. coli S11 and rat S14 ribosomal proteins
YCR031C	K.CK#EVGITAVHVK.I	RPS14A	2.483	335.939	0.2	Ribosomal protein 59 of the small subunit, required for ribosome assembly and 20S pre-rRNA processing; mutations confer cryptopleurine resistance; nearly identical to Rps14Bp and similar to E. coli S11 and rat S14 ribosomal proteins
YCR031C	K.VKADRDESSPYAAMLAAQDVAAK.C	RPS14A	5.9	808.401	0.18	Ribosomal protein 59 of the small subunit, required for ribosome assembly and 20S pre-rRNA processing; mutations confer cryptopleurine resistance; nearly identical to Rps14Bp and similar to E. coli S11 and rat S14 ribosomal proteins
YCR084C	K.FSNDGEYLATGC@NK.T	TUP1	4.5	788.339	-1.77	General repressor of transcription, forms complex with Cyc8p, involved in the establishment of repressive chromatin structure through interactions with histones H3 and H4, appears to enhance expression of some genes
YCR084C	K.SLDHTSVVC@C@VK.F	TUP1	4.071	702.834	-0.06	General repressor of transcription, forms complex with Cyc8p, involved in the establishment of repressive chromatin structure through interactions with histones H3 and H4, appears to enhance expression of some genes
YCR087C-A	K.NHTSC@ISEDEK.Y	YCR087C-A	1.941	660.28	-0.58	Putative protein of unknown function; green fluorescent protein (GFP)-fusion protein localizes to the nucleolus; YCR087C-A is not an essential gene
YCR087C-A	R.C@PNAYYTC@IDC@SK.T	YCR087C-A	4.638	826.331	0.1	Putative protein of unknown function; green fluorescent protein (GFP)-fusion protein localizes to the nucleolus; YCR087C-A is not an essential gene
YCR105W	R.NGCGPGK.R	ADH7	1.653	316.644	-0.57	NADPH-dependent medium chain alcohol dehydrogenase with broad substrate specificity; member of the cinnamyl family of alcohol dehydrogenases; may be involved in fusel alcohol synthesis or in aldehyde tolerance
YDL014W	K.A]NCIDSTVDAETVFAR.E	NOP1	4.981	884.912	-0.18	Nucleolar protein, component of the small subunit processome complex, which is required for processing of pre-18S rRNA; has similarity to mammalian fibrillarin
YDL022W	K.ELLNGQSAQGLITC@K.E	GPD1	4.988	816.424	-0.61	NAD-dependent glycerol-3-phosphate dehydrogenase, key enzyme of glycerol synthesis, essential for growth under osmotic stress; expression regulated by high-osmolarity glycerol response pathway; homolog of Gpd2p
YDL055C	K.STIVGWNSTVGQWC@R.L	PSA1	4.912	875.92	0.04	GDP-mannose pyrophosphorylase (mannose-1-phosphate guanyltransferase), synthesizes GDP-mannose from GTP and mannose-1-phosphate in cell wall biosynthesis; required for normal cell wall structure
YDL061C	R.KYDLNIC@R.Q	RPS29B	2.503	541.276	-0.57	Protein component of the small (40S) ribosomal subunit; nearly identical to Rps29Ap and has similarity to rat S29 and E. coli S14 ribosomal proteins
YDL061C	R.QC@RVC@SSHTGLVR.K	RPS29B	1.883	390.694	0.09	Protein component of the small (40S) ribosomal subunit; nearly identical to Rps29Ap and has similarity to rat S29 and E. coli S14 ribosomal proteins
YDL061C	R.VC@SSHTGLVR.K	RPS29B	2.558	558.285	-0.45	Protein component of the small (40S) ribosomal subunit; nearly identical to Rps29Ap and has similarity to rat S29 and E. coli S14 ribosomal proteins
YDL066W	K.C@ATITPDEAR.V	IDP1	2.64	567.267	0.75	Mitochondrial NADP-specific isocitrate dehydrogenase, catalyzes the oxidation of isocitrate to alpha-ketoglutarate; not required for mitochondrial respiration and may function to divert alpha-ketoglutarate to biosynthetic processes
YDL066W	K.DLALAC@GNNER.S	IDP1	4.01	616.788	-0.08	Mitochondrial NADP-specific isocitrate dehydrogenase, catalyzes the oxidation of isocitrate to alpha-ketoglutarate; not required for mitochondrial respiration and may function to divert alpha-ketoglutarate to biosynthetic processes
YDL073W	R.S]NC@TLEVR.D	YDL073W	1.968	345.835	0.74	Putative protein of unknown function; YDL073W is not an essential gene
YDL084W	R.IC@VSTDVFGR.G	SUB2	3.234	577.287	0.21	Component of the TREX complex required for nuclear mRNA export; member of the DEAD-box RNA helicase superfamily and is involved in early and late steps of spliceosome assembly; homolog of the human splicing factor hUAP56
YDL086W	R.VTC@ATC@FFPTDIHSR.T	YDL086W	2.75	604.612	0.63	Putative protein of unknown function; the authentic, non-tagged protein is detected in highly purified mitochondria in high-throughput studies; YDL086W is not an essential gene
YDL088C	R.IFHNHDTGC@DENDSTVNK.S	ASM4	4.533	701.633	0.9	Nuclear pore complex subunit, part of a subcomplex also containing Nup53p, Nup170p, and Pse1p
YDL100C	K.MPLC@AGEIR.G	GET3	2.888	523.76	0.71	Guanine nucleotide exchange factor for Gpa1p; amplifies G protein signaling; subunit of the GET complex, which is involved in Golgi to ER trafficking; has low-level ATPase activity and is involved in resistance to heat and metal stress
YDL103C	K.FGC@LEVDRC@K.E	QRI1	3.006	642.298	0.57	UDP-N-acetylglucosamine pyrophosphorylase, catalyzes the formation of UDP-N-acetylglucosamine (UDP-GlcNAc), which is important in cell wall biosynthesis, protein N-glycosylation, and GPI anchor biosynthesis
YDL124W	K.F]CQEHDILVEAYSPLGPLQKK.T	YDL124W	3.43	618.821	0.53	NADPH-dependent alpha-keto amide reductase; reduces aromatic alpha-keto amides, aliphatic alpha-keto esters, and aromatic alpha-keto esters; member of the aldo-keto reductase (AKR) family
YDL126C	R.LGDLVTIHPC@PDIK.Y	CDC48	2.558	526.617	0.02	ATPase in ER, nuclear membrane and cytosol with homology to mammalian p97; in a complex with Npl4p and Ufd1p participates in retrotranslocation of ubiquitinated proteins from the ER into the cytosol for degradation by the proteasome
YDL136W	K.SIAC@VLTVINEQQR.E	RPL35B	4.11	544.291	0.23	Protein component of the large (60S) ribosomal subunit, identical to Rpl35Ap and has similarity to rat L35 ribosomal protein
YDL145C	K.FDIC@AATYKPIYEDTPSVSDPLTGSK.Y	COP1	5.324	959.126	-2.01	Alpha subunit of COPI vesicle coatomer complex, which surrounds transport vesicles in the early secretory pathway
YDL145C	R.TYIPSTPC@ELPAQLGYVR.A	COP1	2.531	1033.03	0.28	Alpha subunit of COPI vesicle coatomer complex, which surrounds transport vesicles in the early secretory pathway
YDL168W	K.EINQAFEDLHNGD#CLR.T	SFA1	2.977	644.295	-0.75	Bifunctional enzyme containing both alcohol dehydrogenase and glutathione-dependent formaldehyde dehydrogenase activities, functions in formaldehyde detoxification and formation of long chain and complex alcohols, regulated by Hog1p-Sko1p
YDL171C	K.VIVVGGGDTGNDC@LGTSVR.H	GLT1	5.752	938.466	1.1	NAD(+)-dependent glutamate synthase (GOGAT), synthesizes glutamate from glutamine and alpha-ketoglutarate; with Gln1p, forms the secondary pathway for glutamate biosynthesis from ammonia; expression regulated by nitrogen source
YDL185W	K.FTC@NATHELVVR.T	TFP1	4.45	723.862	0.16	Vacuolar ATPase V1 domain subunit A containing the catalytic nucleotide binding sites; protein precursor undergoes self-catalyzed splicing to yield the extein Tfp1p and the intein Vde (PI-SceI), which is a site-specific endonuclease
YDL226C	K.C@MDC@GAPNPQWATPK.F	GCS1	4.94	874.863	-0.27	ADP-ribosylation factor GTPase activating protein (ARF GAP), involved in ER-Golgi transport; shares functional similarity with Glo3p
YDL229W	R.RTFTTC@ADNQTTVQFPVYQGER.V	SSB1	5.737	873.746	-0.48	Cytoplasmic ATPase that is a ribosome-associated molecular chaperone, functions with J-protein partner Zuo1p; may be involved in folding of newly-made polypeptide chains; member of the HSP70 family; interacts with phosphatase subunit Reg1p
YDL229W	R.T]FTTCADNQTTVQFPVYQGER.V	SSB1	4.817	1232.07	0.66	Cytoplasmic ATPase that is a ribosome-associated molecular chaperone, functions with J-protein partner Zuo1p; may be involved in folding of newly-made polypeptide chains; member of the HSP70 family; interacts with phosphatase subunit Reg1p
YDL229W	R.TFTTC@ADNQTTVQFPVYQGER.V	SSB1	4.144	821.713	-0.04	Cytoplasmic ATPase that is a ribosome-associated molecular chaperone, functions with J-protein partner Zuo1p; may be involved in folding of newly-made polypeptide chains; member of the HSP70 family; interacts with phosphatase subunit Reg1p
YDR023W	K.ELVSC@SNC@TDYQSR.N	SES1	5.025	859.859	-0.36	Cytosolic seryl-tRNA synthetase, class II aminoacyl-tRNA synthetase that aminoacylates tRNA(Ser), displays tRNA-dependent amino acid recognition which enhances discrimination of the serine substrate, interacts with peroxin Pex21p
YDR023W	K.KYVHC@LNSTLAATQR.A	SES1	4.787	587.974	0.4	Cytosolic seryl-tRNA synthetase, class II aminoacyl-tRNA synthetase that aminoacylates tRNA(Ser), displays tRNA-dependent amino acid recognition which enhances discrimination of the serine substrate, interacts with peroxin Pex21p
YDR023W	K.YVHC@LNSTLAATQR.A	SES1	4.279	817.409	-0.29	Cytosolic seryl-tRNA synthetase, class II aminoacyl-tRNA synthetase that aminoacylates tRNA(Ser), displays tRNA-dependent amino acid recognition which enhances discrimination of the serine substrate, interacts with peroxin Pex21p
YDR037W	K.EIC@NAYTELNDPFDQR.A	KRS1	4.721	992.939	-0.19	Lysyl-tRNA synthetase; also identified as a negative regulator of general control of amino acid biosynthesis
YDR037W	K.ILVDNKLEC@PPPLTNAR.M	KRS1	3.456	650.687	-0.09	Lysyl-tRNA synthetase; also identified as a negative regulator of general control of amino acid biosynthesis
YDR037W	R.VQLLTPC@LHMLPADHFGFK.D	KRS1	2.743	560.789	0.01	Lysyl-tRNA synthetase; also identified as a negative regulator of general control of amino acid biosynthesis
YDR045C	R.S]AD#EPMTTFYK.C	RPC11	2.292	710.308	-0.3	RNA polymerase III subunit C11; mediates pol III RNA cleavage activity and is important for termination of transcription; homologous to TFIIS
YDR050C	R.LNTASIPENVEVVIC@PPATYLDYSVSLVK.K	TPI1	3.004	1064.56	0.06	Triose phosphate isomerase, abundant glycolytic enzyme; mRNA half-life is regulated by iron availability; transcription is controlled by activators Reb1p, Gcr1p, and Rap1p through binding sites in the 5' non-coding region
YDR074W	R.IINC@VTQLPYK.I	TPS2	4.163	674.868	-0.37	Phosphatase subunit of the trehalose-6-phosphate synthase/phosphatase complex, which synthesizes the storage carbohydrate trehalose; expression is induced by stress conditions and repressed by the Ras-cAMP pathway
YDR091C	R.APESLLTGC@NR.F	RLI1	2.986	609.301	0.3	Essential iron-sulfur protein required for ribosome biogenesis and translation initiation; facilitates binding of a multifactor complex (MFC) of translation initiation factors to the small ribosomal subunit; predicted ABC family ATPase
YDR120C	K.AWDNLYGEEC@GQK.R	TRM1	3.838	785.336	0.34	tRNA methyltransferase, localizes to both the nucleus and mitochondrion to produce the modified base N2,N2-dimethylguanosine in tRNAs in both compartments
YDR158W	K.EYVC@DAYK.L	HOM2	2.037	524.226	0.35	Aspartic beta semi-aldehyde dehydrogenase, catalyzes the second step in the common pathway for methionine and threonine biosynthesis; expression regulated by Gcn4p and the general control of amino acid synthesis
YDR158W	R.VAVSDGHTEC@ISLR.F	HOM2	4.506	772.38	0.01	Aspartic beta semi-aldehyde dehydrogenase, catalyzes the second step in the common pathway for methionine and threonine biosynthesis; expression regulated by Gcn4p and the general control of amino acid synthesis
YDR172W	K.ERYDQC@VSNVSNFLR.A	SUP35	4.673	629.632	0.23	Translation termination factor eRF3; altered protein conformation creates the [PSI(+)] prion, a dominant cytoplasmically inherited protein aggregate that alters translational fidelity and creates a nonsense suppressor phenotype
YDR211W	R.C]IYYQDLPLPSSR.E	GCD6	3.67	806.395	-0.04	Catalytic epsilon subunit of the translation initiation factor eIF2B, the guanine-nucleotide exchange factor for eIF2; activity subsequently regulated by phosphorylated eIF2; first identified as a negative regulator of GCN4 expression
YDR212W	K.GIDDLC@LK.E	TCP1	2.476	467.239	0.03	Alpha subunit of chaperonin-containing T-complex, which mediates protein folding in the cytosol; involved in maintenance of actin cytoskeleton; homolog to Drosophila melanogaster and mouse tailless complex polypeptide
YDR212W	K.SATESLLVPGYALNC@TVASQAMPK.R	TCP1	3.541	842.085	-0.38	Alpha subunit of chaperonin-containing T-complex, which mediates protein folding in the cytosol; involved in maintenance of actin cytoskeleton; homolog to Drosophila melanogaster and mouse tailless complex polypeptide
YDR233C	K.QKTQEFSQMAC@EK.T	RTN1	2.858	538.913	-0.81	ER membrane protein that interacts with exocyst subunit Sec6p and with Yip3p; also interacts with Sbh1p; null mutant has an altered (mostly cisternal) ER morphology; member of the RTNLA (reticulon-like A) subfamily
YDR233C	K.SC@NC@DLLLWR.N	RTN1	3.426	668.81	-0.17	ER membrane protein that interacts with exocyst subunit Sec6p and with Yip3p; also interacts with Sbh1p; null mutant has an altered (mostly cisternal) ER morphology; member of the RTNLA (reticulon-like A) subfamily
YDR234W	R.LSDLQSAADVVC@PTGDLNK.V	LYS4	5.226	1001.99	-1.82	Homoaconitase, catalyzes the conversion of homocitrate to homoisocitrate, which is a step in the lysine biosynthesis pathway
YDR272W	K.D#PTTDERCIFTGDTLFTAGCGR[.F	GLO2	4.867	830.706	0.16	Cytoplasmic glyoxalase II, catalyzes the hydrolysis of S-D-lactoylglutathione into glutathione and D-lactate
YDR272W	R.C@IFTGDTLFTAGC@GR.F	GLO2	4.903	838.382	0.11	Cytoplasmic glyoxalase II, catalyzes the hydrolysis of S-D-lactoylglutathione into glutathione and D-lactate
YDR321W	K.SQNAAVNGSGIAC@QQR.S	ASP1	5.412	830.895	0.09	Cytosolic L-asparaginase, involved in asparagine catabolism
YDR338C	R.YSSVCNSDNEEASQSNTPDRIQE#YSGRELE#YD#EFMNR.L	YDR338C	3.671	1134.23	0.34	Hypothetical protein
YDR346C	K.IC@AVVEGPLNNLVER.I	SVF1	4.869	841.95	2.45	Protein with a potential role in cell survival pathways, required for the diauxic growth shift; expression in mammalian cells increases survival under conditions inducing apoptosis
YDR353W	K.GISAC@AVC@DGAVPIFR.N	TRR1	4.465	846.913	0.03	Cytoplasmic thioredoxin reductase, key regulatory enzyme that determines the redox state of the thioredoxin system, which acts as a disulfide reductase system and protects cells against both oxidative and reductive stress
YDR353W	K.GISAC@AVCD#GAVPIFR.N	TRR1	2.116	564.945	0.02	Cytoplasmic thioredoxin reductase, key regulatory enzyme that determines the redox state of the thioredoxin system, which acts as a disulfide reductase system and protects cells against both oxidative and reductive stress
YDR353W	R.NKPLAVIGGGDSAC@EEAQFLTK.Y	TRR1	5.191	769.054	-0.23	Cytoplasmic thioredoxin reductase, key regulatory enzyme that determines the redox state of the thioredoxin system, which acts as a disulfide reductase system and protects cells against both oxidative and reductive stress
YDR353W	R.QAITSAGSGC@MAALDAEK.Y	TRR1	4.771	898.911	-0.43	Cytoplasmic thioredoxin reductase, key regulatory enzyme that determines the redox state of the thioredoxin system, which acts as a disulfide reductase system and protects cells against both oxidative and reductive stress
YDR385W	K.IQEPVFLVEIQC@PEQAVGGIYSVLNK.K	EFT2	6.014	977.515	-0.76	Elongation factor 2 (EF-2), also encoded by EFT1; catalyzes ribosomal translocation during protein synthesis; contains diphthamide, the unique posttranslationally modified histidine residue specifically ADP-ribosylated by diphtheria toxin
YDR385W	K.IWC@FGPDGNGPNLVIDQTK.A	EFT2	6.004	1066.02	-1.5	Elongation factor 2 (EF-2), also encoded by EFT1; catalyzes ribosomal translocation during protein synthesis; contains diphthamide, the unique posttranslationally modified histidine residue specifically ADP-ribosylated by diphtheria toxin
YDR385W	R.AEQLYEGPADDANC@IAIK.N	EFT2	5.723	989.465	-0.11	Elongation factor 2 (EF-2), also encoded by EFT1; catalyzes ribosomal translocation during protein synthesis; contains diphthamide, the unique posttranslationally modified histidine residue specifically ADP-ribosylated by diphtheria toxin
YDR385W	R.FVEPIDD#CPAGNIIGLVGIDQFLLK.T	EFT2	5.163	915.151	0.34	Elongation factor 2 (EF-2), also encoded by EFT1; catalyzes ribosomal translocation during protein synthesis; contains diphthamide, the unique posttranslationally modified histidine residue specifically ADP-ribosylated by diphtheria toxin
YDR385W	R.KIWC@FGPDGNGPNLVIDQTK.A	EFT2	5.138	753.713	0.64	Elongation factor 2 (EF-2), also encoded by EFT1; catalyzes ribosomal translocation during protein synthesis; contains diphthamide, the unique posttranslationally modified histidine residue specifically ADP-ribosylated by diphtheria toxin
YDR388W	K.IVTPC@QELLK.I	RVS167	2.491	600.836	0.02	Actin-associated protein, subunit of a complex (Rvs161p-Rvs167p) involved in regulation of actin cytoskeleton, endocytosis, and viability following starvation or osmotic stress; homolog of mammalian amphiphysin
YDR399W	K.QYISYNNVHQLC@QVSAER.I	HPT1	4.213	737.02	-0.2	Dimeric hypoxanthine-guanine phosphoribosyltransferase, catalyzes the formation of both inosine monophosphate and guanosine monophosphate; mutations in the human homolog HPRT1 can cause Lesch-Nyhan syndrome and Kelley-Seegmiller syndrome
YDR405W	R.L]NCLGSDANKPGTAFDGVVGPYER.V	MRP20	4.521	846.408	-0.37	Mitochondrial ribosomal protein of the large subunit
YDR408C	K.VC@SLYPYTK.G	ADE8	2.64	565.781	-0.65	Phosphoribosyl-glycinamide transformylase, catalyzes a step in the 'de novo' purine nucleotide biosynthetic pathway
YDR418W	K.EILGTAQSVGC@R.V	RPL12B	3.849	645.827	0.03	Protein component of the large (60S) ribosomal subunit, nearly identical to Rpl12Ap; rpl12a rpl12b double mutant exhibits slow growth and slow translation; has similarity to E. coli L11 and rat L12 ribosomal proteins
YDR432W	K.NLPEGC@SWQDLK.D	NPL3	3.503	723.838	-0.16	RNA-binding protein that carries poly(A)+ mRNA from the nucleus into the cytoplasm; dissociation from mRNAs is promoted by Mtr10p; phosphorylated by Sky1p in the cytoplasm
YDR447C	K.R]LCDEIATIQSK.R	RPS17B	3.124	478.586	0.35	Ribosomal protein 51 (rp51) of the small (40s) subunit; nearly identical to Rps17Ap and has similarity to rat S17 ribosomal protein
YDR450W	R.YSNLVC@K.K	RPS18A	2.702	442.221	0.11	Protein component of the small (40S) ribosomal subunit; nearly identical to Rps18Bp and has similarity to E. coli S13 and rat S18 ribosomal proteins
YDR454C	K.TC@ILDIDMQGVK.S	GUK1	3.675	704.844	0.06	Guanylate kinase, converts GMP to GDP; required for growth and mannose outer chain elongation of cell wall N-linked glycoproteins
YDR487C	K.SFLKPGHICPLR[.A	RIB3	2.691	475.599	0.29	3,4-dihydroxy-2-butanone-4-phosphate synthase (DHBP synthase), required for riboflavin biosynthesis from ribulose-5-phosphate, also has an unrelated function in mitochondrial respiration
YDR487C	R.LNDC@QAFGK.K	RIB3	2.922	526.745	-0.62	3,4-dihydroxy-2-butanone-4-phosphate synthase (DHBP synthase), required for riboflavin biosynthesis from ribulose-5-phosphate, also has an unrelated function in mitochondrial respiration
YDR500C	K.KTC@SSC@GYPSAK.T	RPL37B	2.065	673.297	-0.53	Protein component of the large (60S) ribosomal subunit, has similarity to Rpl37Ap and to rat L37 ribosomal protein
YDR500C	K.T]CSSC@GYPSAK.T	RPL37B	3.257	609.25	0.06	Protein component of the large (60S) ribosomal subunit, has similarity to Rpl37Ap and to rat L37 ribosomal protein
YDR519W	K.GWDQGVAGMC@VGEK.R	FPR2	3.811	755.327	0.62	Membrane-bound peptidyl-prolyl cis-trans isomerase (PPIase), binds to the drugs FK506 and rapamycin; expression pattern suggests possible involvement in ER protein trafficking
YEL002C	K.FFENEGNILC@MSSPGAVPNTIR.L	WBP1	3.502	823.722	-0.36	Beta subunit of the oligosaccharyl transferase (OST) glycoprotein complex; required for N-linked glycosylation of proteins in the endoplasmic reticulum
YEL013W	K.EFFESGAVEK.C	VAC8	3.008	571.772	-0.15	Phosphorylated vacuolar membrane protein that interacts with Atg13p, required for the cytoplasm-to-vacuole targeting (Cvt) pathway; interacts with Nvj1p to form nucleus-vacuole junctions
YEL026W	R.A]CGVSRPVIAASITTNDASAIK.T	SNU13	3.501	734.724	0.76	RNA binding protein, part of U3 snoRNP involved in rRNA processing, part of U4/U6-U5 tri-snRNP involved in mRNA splicing, similar to human 15.5K protein
YEL037C	K.LAQSISCE#ESQIK.L	RAD23	4.513	746.869	-0.33	Protein with ubiquitin-like N terminus, recognizes and binds damaged DNA (with Rad4p) during nucleotide excision repair; regulates Rad4p levels, subunit of Nuclear Excision Repair Factor 2 (NEF2); homolog of human HR23A and HR23B proteins
YEL047C	K.ASSGINGAC@TETQR.H	YEL047C	3.842	726.331	-0.37	Soluble fumarate reductase, required with isoenzyme Osm1p for anaerobic growth; may interact with ribosomes, based on co-purification experiments; authentic, non-tagged protein is detected in purified mitochondria in high-throughput studies
YER023W	K.H#QVCTPGGTTIAGLC@VMEEK.G	PRO3	4.462	735.343	0.27	Delta 1-pyrroline-5-carboxylate reductase, catalyzes the last step in proline biosynthesis
YER023W	K.H]QVCTPGGTTIAGLC@VMEEK.G	PRO3	3.873	730.011	0.05	Delta 1-pyrroline-5-carboxylate reductase, catalyzes the last step in proline biosynthesis
YER023W	K.HQVC@TPGGTTIAGLC@VMEEK.G	PRO3	3.755	735.343	-0.03	Delta 1-pyrroline-5-carboxylate reductase, catalyzes the last step in proline biosynthesis
YER025W	K.C@QEPTC@PEPDC@YR.S	GCD11	3.668	856.329	-0.57	Gamma subunit of the translation initiation factor eIF2, involved in the identification of the start codon; binds GTP when forming the ternary complex with GTP and tRNAi-Met
YER025W	R.LQLTSPAC@TEINEK.I	GCD11	4.412	802.403	-0.62	Gamma subunit of the translation initiation factor eIF2, involved in the identification of the start codon; binds GTP when forming the ternary complex with GTP and tRNAi-Met
YER036C	R.YGLLGENGC@GK.S	ARB1	3.471	584.277	0.11	ATPase of the ATP-binding cassette (ABC) family involved in 40S and 60S ribosome biogenesis, has similarity to Gcn20p; shuttles from nucleus to cytoplasm, physically interacts with Tif6p, Lsg1p
YER043C	K.SKFDNLYGCR[.E	SAH1	3.237	630.296	0.06	S-adenosyl-L-homocysteine hydrolase, catabolizes S-adenosyl-L-homocysteine which is formed after donation of the activated methyl group of S-adenosyl-L-methionine (AdoMet) to an acceptor
YER056C-A	K.C@GDC@GSALQGISTLRPR.Q	RPL34A	2.314	616.633	0.26	Protein component of the large (60S) ribosomal subunit, nearly identical to Rpl34Bp and has similarity to rat L34 ribosomal protein
YER062C	K.L]CNALNALPK.E	HOR2	2.563	557.308	0.42	One of two redundant DL-glycerol-3-phosphatases (RHR2/GPP1 encodes the other) involved in glycerol biosynthesis; induced in response to hyperosmotic stress and oxidative stress, and during the diauxic transition
YER086W	K.IPATIVMPVC@TPSIK.Y	ILV1	3.548	821.948	-0.87	Threonine deaminase, catalyzes the first step in isoleucine biosynthesis; expression is under general amino acid control; ILV1 locus exhibits highly positioned nucleosomes whose organization is independent of known ILV1 regulation
YER089C	K.SQNLLVC@GNAGDSR.T	PTC2	4.139	745.855	0.39	Type 2C protein phosphatase; dephosphorylates Hog1p to limit maximal osmostress induced kinase activity; dephosphorylates Ire1p to downregulate the unfolded protein response; dephosphorylates Cdc28p; role in DNA checkpoint inactivation
YER091C	K.FWVNPDC@GLK.T	MET6	2.686	618.298	0.24	Cobalamin-independent methionine synthase, involved in amino acid biosynthesis; requires a minimum of two glutamates on the methyltetrahydrofolate substrate, similar to bacterial metE homologs
YER091C	K.GMLTGPITC@LR.W	MET6	3.755	617.818	0.61	Cobalamin-independent methionine synthase, involved in amino acid biosynthesis; requires a minimum of two glutamates on the methyltetrahydrofolate substrate, similar to bacterial metE homologs
YER091C	K.TQIHSHFC@YSDLDPNHIK.A	MET6	3.229	553.761	-0.02	Cobalamin-independent methionine synthase, involved in amino acid biosynthesis; requires a minimum of two glutamates on the methyltetrahydrofolate substrate, similar to bacterial metE homologs
YER107C	R.FVQC@GPSNTEC@IVTGSWDK.T	GLE2	5.441	1092.99	0.5	Component of the nuclear pore complex required for polyadenylated RNA export but not for protein import, homologous to S. pombe Rae1p
YER110C	K.VACE#EIDVDDELNNEDETGENEENTPSSSAIR.L	KAP123	4.077	1194.17	-1.44	Karyopherin beta, mediates nuclear import of ribosomal proteins prior to assembly into ribosomes and import of histones H3 and H4; localizes to the nuclear pore, nucleus, and cytoplasm; exhibits genetic interactions with RAI1
YER125W	K.C@VSEWDNEQR.A	RSP5	2.836	661.775	0.29	Ubiquitin-protein ligase involved in ubiquitin-mediated protein degradation; functions in multivesicular body sorting, heat shock response and ubiquitylation of arrested RNAPII; contains a hect (homologous to E6-AP carboxyl terminus) domain
YER131W	K.LHYC@VSC@AIHAR.I	RPS26B	3.781	496.239	-0.34	Protein component of the small (40S) ribosomal subunit; nearly identical to Rps26Ap and has similarity to rat S26 ribosomal protein
YER133W	R.IYGFYDEC@K.R	GLC7	2.543	597.76	-0.89	Catalytic subunit of type 1 serine/threonine protein phosphatase, involved in many processes including glycogen metabolism, sporulation, and mitosis; interacts with multiple regulatory subunits; predominantly isolated with Sds22p
YER136W	K.APLVIADPTYFPEK.C	GDI1	4.643	780.919	-0.08	GDP dissociation inhibitor, regulates vesicle traffic in secretory pathways by regulating the dissociation of GDP from the Sec4/Ypt/rab family of GTP binding proteins
YER151C	K.SFQH#CATADAVKPDEFYK.T	UBP3	2.872	705.326	-0.35	Ubiquitin-specific protease that interacts with Bre5p to co-regulate anterograde and retrograde transport between endoplasmic reticulum and Golgi compartments; inhibitor of gene silencing; cleaves ubiquitin fusions but not polyubiquitin
YER151C	K.SFQHC@ATADAVKPDEFYK.T	UBP3	4.658	705.326	-0.35	Ubiquitin-specific protease that interacts with Bre5p to co-regulate anterograde and retrograde transport between endoplasmic reticulum and Golgi compartments; inhibitor of gene silencing; cleaves ubiquitin fusions but not polyubiquitin
YER165W	K.GFGFVC@FSTPEEATK.A	PAB1	4.994	838.884	-0.54	Poly(A) binding protein, part of the 3'-end RNA-processing complex, mediates interactions between the 5' cap structure and the 3' mRNA poly(A) tail, involved in control of poly(A) tail length, interacts with translation factor eIF-4G
YER177W	K.SEHQVELIC@SYR.S	BMH1	2.958	507.577	0.34	14-3-3 protein, major isoform; controls proteome at post-transcriptional level, binds proteins and DNA, involved in regulation of many processes including exocytosis, vesicle transport, Ras/MAPK signaling, and rapamycin-sensitive signaling
YFL018C	K.AAQLGFNTAC@VEK.R	LPD1	3.569	704.848	-0.03	Dihydrolipoamide dehydrogenase, the lipoamide dehydrogenase component (E3) of the pyruvate dehydrogenase and 2-oxoglutarate dehydrogenase multi-enzyme complexes
YFL018C	K.LGGTC@LNVGC@IPSK.A	LPD1	4.104	738.371	-0.23	Dihydrolipoamide dehydrogenase, the lipoamide dehydrogenase component (E3) of the pyruvate dehydrogenase and 2-oxoglutarate dehydrogenase multi-enzyme complexes
YFL037W	R.EAE#GCDSLQGFQITHSLGGGTGSGMGTLLISK.I	TUB2	3.579	1075.51	-0.65	Beta-tubulin; associates with alpha-tubulin (Tub1p and Tub3p) to form tubulin dimer, which polymerizes to form microtubules
YFL037W	R.EAEGC@DSLQGFQITHSLGGGTGSGMGTLLISK.I	TUB2	4.049	1075.51	-0.69	Beta-tubulin; associates with alpha-tubulin (Tub1p and Tub3p) to form tubulin dimer, which polymerizes to form microtubules
YFL039C	R.FRAPEALFHPSVLGLESAGIDQTTYNSIMK.C	ACT1	4.634	827.92	-1.32	Actin, structural protein involved in cell polarization, endocytosis, and other cytoskeletal functions
YFL045C	K.C]C@IGFVGGSDLSK.Q	SEC53	3.964	700.321	0.42	Phosphomannomutase, involved in synthesis of GDP-mannose and dolichol-phosphate-mannose; required for folding and glycosylation of secretory proteins in the ER lumen
YFL045C	R.NKC@C@IGFVGGSDLSK.Q	SEC53	5.06	821.388	-2.58	Phosphomannomutase, involved in synthesis of GDP-mannose and dolichol-phosphate-mannose; required for folding and glycosylation of secretory proteins in the ER lumen
YFL048C	K.IYDQSFASC@LMGYQDSSVPSTIR.V	EMP47	4.015	881.067	-1.13	Integral membrane component of endoplasmic reticulum-derived COPII-coated vesicles, which function in ER to Golgi transport
YFR006W	R.QYTSDITR.C	YFR006W	2.207	492.243	0.2	Putative X-Pro aminopeptidase; green fluorescent protein (GFP)-fusion protein localizes to the cytoplasm; YFR006W is not an essential gene
YFR037C	K.LC@DLETQLEMEK.L	RSC8	4.209	762.851	1.89	Component of the RSC chromatin remodeling complex; essential for viability and mitotic growth; homolog of SWI/SNF subunit Swi3p, but unlike Swi3p, does not activate transcription of reporters
YFR044C	K.CRTELIHDGAY#WVSDPFNAQFTAAK.K	DUG1	3.324	725.096	-1.67	Probable di- and tri-peptidase; forms a complex with Dug2p and Dug3p to degrade glutathione (GSH) and other peptides containing a gamma-glu-X bond in an alternative pathway to GSH degradation by gamma-glutamyl transpeptidase (Ecm38p)
YFR053C	K.LADDIPSNSPMAINC@EYGSFDNEHLVLPR.T	HXK1	2.502	1097.51	-0.46	Hexokinase isoenzyme 1, a cytosolic protein that catalyzes phosphorylation of glucose during glucose metabolism; expression is highest during growth on non-glucose carbon sources; glucose-induced repression involves the hexokinase Hxk2p
YFR053C	R.LAVC@GIAAIC@QK.R	HXK1	3.439	652.347	0.68	Hexokinase isoenzyme 1, a cytosolic protein that catalyzes phosphorylation of glucose during glucose metabolism; expression is highest during growth on non-glucose carbon sources; glucose-induced repression involves the hexokinase Hxk2p
YGL008C	K.KVTAVVESPEGERIVC@VK.G	PMA1	3.623	667.366	-0.55	Plasma membrane H+-ATPase, pumps protons out of the cell; major regulator of cytoplasmic pH and plasma membrane potential; part of the P2 subgroup of cation-transporting ATPases
YGL008C	K.VTAVVESPE#GERIVCVK.G	PMA1	3.474	624.668	-0.01	Plasma membrane H+-ATPase, pumps protons out of the cell; major regulator of cytoplasmic pH and plasma membrane potential; part of the P2 subgroup of cation-transporting ATPases
YGL008C	K.VTAVVESPEGERIVC@VK.G	PMA1	5.129	936.498	-0.45	Plasma membrane H+-ATPase, pumps protons out of the cell; major regulator of cytoplasmic pH and plasma membrane potential; part of the P2 subgroup of cation-transporting ATPases
YGL009C	K.VFIGSC@TNGR.I	LEU1	2.439	555.772	-0.17	Isopropylmalate isomerase, catalyzes the second step in the leucine biosynthesis pathway
YGL009C	R.EAGC@SIC@LGMNPDILDAYER.C	LEU1	5.131	1150.5	-0.17	Isopropylmalate isomerase, catalyzes the second step in the leucine biosynthesis pathway
YGL009C	R.RVDC@TLATVDHNIPTESRK.N	LEU1	2.875	553.784	-0.76	Isopropylmalate isomerase, catalyzes the second step in the leucine biosynthesis pathway
YGL019W	R.QYPSTEEDWEEFAK.C	CKB1	3.388	879.878	-0.38	Beta regulatory subunit of casein kinase 2, a Ser/Thr protein kinase with roles in cell growth and proliferation; the holoenzyme also contains CKA1, CKA2 and CKB2, the many substrates include transcription factors and all RNA polymerases
YGL021W	R.FIALEVSDND#D#DCDTDLTADTADELESSAILKMR.E	ALK1	2.255	966.184	-0.12	Protein kinase; accumulation and phosphorylation are periodic during the cell cycle; phosphorylated in response to DNA damage; contains characteristic motifs for degradation via the APC pathway; similar to Alk2p and to mammalian haspins
YGL026C	K.IVTLCGD#APEGK.R	TRP5	3.671	630.319	0.17	Tryptophan synthase involved in tryptophan biosynthesis, regulated by the general control system of amino acid biosynthesis
YGL026C	K.NVIAETGAGQHGVATATAC@AK.F	TRP5	3.627	676.337	-0.12	Tryptophan synthase involved in tryptophan biosynthesis, regulated by the general control system of amino acid biosynthesis
YGL026C	R.FGDFGGQYVPEALHAC@LR.E	TRP5	4.61	679.66	-0.18	Tryptophan synthase involved in tryptophan biosynthesis, regulated by the general control system of amino acid biosynthesis
YGL028C	K.AIAYSPYNDDGSC@K.S	SCW11	3.336	780.835	-0.65	Cell wall protein with similarity to glucanases; may play a role in conjugation during mating based on its regulation by Ste12p
YGL043W	K.VNNC@DTNEAAYK.A	DST1	2.969	699.801	-0.2	General transcription elongation factor TFIIS, enables RNA polymerase II to read through blocks to elongation by stimulating cleavage of nascent transcripts stalled at transcription arrest sites
YGL043W	R.SADEPLTTFC@TC@EAC@GNR.W	DST1	4.441	1044.92	-0.59	General transcription elongation factor TFIIS, enables RNA polymerase II to read through blocks to elongation by stimulating cleavage of nascent transcripts stalled at transcription arrest sites
YGL049C	K.LVLHYLVAR.C	TIF4632	2.542	361.894	-0.12	Translation initiation factor eIF4G, subunit of the mRNA cap-binding protein complex (eIF4F) that also contains eIF4E (Cdc33p); associates with the poly(A)-binding protein Pab1p, also interacts with eIF4A (Tif1p); homologous to Tif4631p
YGL087C	R.IYSLSIDC@GPNYPDSPPK.V	MMS2	4.314	1011.98	0.69	Protein involved in error-free postreplication DNA repair; forms a heteromeric complex with Ubc13p that has a ubiquitin-conjugating activity; cooperates with chromatin-associated RING finger proteins, Rad18p and Rad5p
YGL135W	K.LPNC@PRPNMSIC@IFGDAFDVDRAK.S	RPL1B	2.536	703.086	-0.4	N-terminally acetylated protein component of the large (60S) ribosomal subunit, nearly identical to Rpl1Ap and has similarity to E. coli L1 and rat L10a ribosomal proteins; rpl1a rpl1b double null mutation is lethal
YGL135W	K.S]CGVDAMSVDDLKK.L	RPL1B	2.535	514.237	-0.61	N-terminally acetylated protein component of the large (60S) ribosomal subunit, nearly identical to Rpl1Ap and has similarity to E. coli L1 and rat L10a ribosomal proteins; rpl1a rpl1b double null mutation is lethal
YGL135W	K.SC@GVDAMSVDDLK.K	RPL1B	4.113	698.808	-0.21	N-terminally acetylated protein component of the large (60S) ribosomal subunit, nearly identical to Rpl1Ap and has similarity to E. coli L1 and rat L10a ribosomal proteins; rpl1a rpl1b double null mutation is lethal
YGL157W	K.DTWDSC@QANAVAAYC@GSK.K	YGL157W	4.642	1002.42	0.42	Oxidoreductase, catalyzes NADPH-dependent reduction of the bicyclic diketone bicyclo[2.2.2]octane-2,6-dione (BCO2,6D) to the chiral ketoalcohol (1R,4S,6S)-6-hydroxybicyclo[2.2.2]octane-2-one (BCO2one6ol)
YGL187C	R.C@WEC@GSVYK.L	COX4	2.063	594.744	-0.13	Subunit IV of cytochrome c oxidase, which is the terminal member of the mitochondrial inner membrane electron transport chain; N-terminal 25 residues of precursor are cleaved during mitochondrial import; phosphorylated
YGL202W	R.D#CAIDALYK.Y	ARO8	2.865	534.755	0.28	Aromatic aminotransferase I, expression is regulated by general control of amino acid biosynthesis
YGL206C	K.LVNDAC@IEKK.E	CHC1	2.886	595.316	0.34	Clathrin heavy chain, subunit of the major coat protein involved in intracellular protein transport and endocytosis; two heavy chains form the clathrin triskelion structural component; the light chain (CLC1) is thought to regulate function
YGL206C	R.LC@YSAVSNYSK.L	CHC1	3.978	646.303	0.17	Clathrin heavy chain, subunit of the major coat protein involved in intracellular protein transport and endocytosis; two heavy chains form the clathrin triskelion structural component; the light chain (CLC1) is thought to regulate function
YGL207W	R.STNDQLYGNGC@ILASC@GIR.Y	SPT16	3.067	1049.99	0.04	Subunit of the heterodimeric FACT complex (Spt16p-Pob3p), facilitates RNA Polymerase II transcription elongation through nucleosomes by destabilizing and then reassembling nucleosome structure
YGL221C	K.TVIVC@NHSNTER.G	NIF3	3.192	715.346	-0.09	Protein of unknown function, similar to Listeria monocytogenes major sigma factor (rpoD gene product); the authentic, non-tagged protein is detected in highly purified mitochondria in high-throughput studies
YGL232W	K.VSSGFLDPGTSGIYATC@SR.R	TAN1	4.549	987.966	1.16	Putative tRNA acetyltransferase, RNA-binding protein required for the formation of the modified nucleoside N(4)-acetylcytidine in serine and leucine tRNAs but not required for the same modification in 18S rRNA
YGL234W	K.D#APGCVIENGTKLY.-	ADE5	3.811	768.87	-1.76	Bifunctional enzyme of the 'de novo' purine nucleotide biosynthetic pathway, contains aminoimidazole ribotide synthetase and glycinamide ribotide synthetase activities
YGL234W	K.DAPGC@VIENGTK.L	ADE5	3.382	630.798	0.29	Bifunctional enzyme of the 'de novo' purine nucleotide biosynthetic pathway, contains aminoimidazole ribotide synthetase and glycinamide ribotide synthetase activities
YGL234W	R.TAVDTVYEAVK.C	ADE5	3.605	598.313	-1.37	Bifunctional enzyme of the 'de novo' purine nucleotide biosynthetic pathway, contains aminoimidazole ribotide synthetase and glycinamide ribotide synthetase activities
YGL242C	K.LINESKEPLGNTALHLC@C@K.Y	YGL242C	2.314	550.033	-0.2	Putative protein of unknown function; deletion mutant is viable
YGL245W	K.AYC@DDTPTEK.M	GUS1	3.295	600.248	-0.24	Glutamyl-tRNA synthetase (GluRS), forms a complex with methionyl-tRNA synthetase (Mes1p) and Arc1p; complex formation increases the catalytic efficiency of both tRNA synthetases and ensures their correct localization to the cytoplasm
YGL245W	K.IYPTYDFC@VPIVDAIEGVTHALR.T	GUS1	1.726	883.784	0.08	Glutamyl-tRNA synthetase (GluRS), forms a complex with methionyl-tRNA synthetase (Mes1p) and Arc1p; complex formation increases the catalytic efficiency of both tRNA synthetases and ensures their correct localization to the cytoplasm
YGL245W	K.TLRDPVIYR.C	GUS1	3.01	378.221	-0.07	Glutamyl-tRNA synthetase (GluRS), forms a complex with methionyl-tRNA synthetase (Mes1p) and Arc1p; complex formation increases the catalytic efficiency of both tRNA synthetases and ensures their correct localization to the cytoplasm
YGL245W	K.YSAADVAC@WGALR.S	GUS1	4.716	720.34	-0.63	Glutamyl-tRNA synthetase (GluRS), forms a complex with methionyl-tRNA synthetase (Mes1p) and Arc1p; complex formation increases the catalytic efficiency of both tRNA synthetases and ensures their correct localization to the cytoplasm
YGL253W	K.LSDDIPPSAPMAINCEYGSFDNE#HVVLPR.T	HXK2	2.508	1087.17	0.07	Hexokinase isoenzyme 2 that catalyzes phosphorylation of glucose in the cytosol; predominant hexokinase during growth on glucose; functions in the nucleus to repress expression of HXK1 and GLK1 and to induce expression of its own gene
YGL253W	R.LSVC@GIAAIC@QK.R	HXK2	3.86	660.344	-0.13	Hexokinase isoenzyme 2 that catalyzes phosphorylation of glucose in the cytosol; predominant hexokinase during growth on glucose; functions in the nucleus to repress expression of HXK1 and GLK1 and to induce expression of its own gene
YGR017W	K.TDGKDEDLWEEQEVC@P.-	YGR017W	4.279	975.407	-0.58	Putative protein of unknown function; green fluorescent protein (GFP)-fusion protein localizes to both the nucleus and the cytoplasm
YGR017W	K.TDGKDEDLWEEQEVCP[.-	YGR017W	3.618	975.406	-1.11	Putative protein of unknown function; green fluorescent protein (GFP)-fusion protein localizes to both the nucleus and the cytoplasm
YGR019W	K.LNGC@NVGGC@AVHAVR.L	UGA1	3.407	528.589	-0.13	Gamma-aminobutyrate (GABA) transaminase (4-aminobutyrate aminotransferase) involved in the 4-aminobutyrate and glutamate degradation pathways; required for normal oxidative stress tolerance and nitrogen utilization
YGR032W	K.HC@EYYQC@GK.G	GSC2	2.777	622.745	0.03	Catalytic subunit of 1,3-beta-glucan synthase, involved in formation of the inner layer of the spore wall; activity positively regulated by Rho1p and negatively by Smk1p; has similarity to an alternate catalytic subunit, Fks1p (Gsc1p)
YGR054W	K.C@VSKFDATNTSVCK[.W	YGR054W	3.913	539.585	-0.27	Eukaryotic initiation factor (eIF) 2A; associates specifically with both 40S subunits and 80 S ribosomes, and interacts genetically with both eIF5b and eIF4E; homologous to mammalian eIF2A
YGR054W	K.D#CVSEDIVPAYEYQAK.S	YGR054W	6.053	943.927	-0.21	Eukaryotic initiation factor (eIF) 2A; associates specifically with both 40S subunits and 80 S ribosomes, and interacts genetically with both eIF5b and eIF4E; homologous to mammalian eIF2A
YGR061C	K.ATNIAHVC@GLQDK.V	ADE6	2.674	476.242	0.24	Formylglycinamidine-ribonucleotide (FGAM)-synthetase, catalyzes a step in the 'de novo' purine nucleotide biosynthetic pathway
YGR061C	K.FFNERQDTFAFGAC@NGC@QFLSR.L	ADE6	5.06	891.397	-0.06	Formylglycinamidine-ribonucleotide (FGAM)-synthetase, catalyzes a step in the 'de novo' purine nucleotide biosynthetic pathway
YGR061C	R.LKDIIPGC@ENWPSFER.N	ADE6	2.91	654.324	-0.63	Formylglycinamidine-ribonucleotide (FGAM)-synthetase, catalyzes a step in the 'de novo' purine nucleotide biosynthetic pathway
YGR061C	R.QDTFAFGAC@NGC@QFLSR.L	ADE6	5.099	989.93	0.05	Formylglycinamidine-ribonucleotide (FGAM)-synthetase, catalyzes a step in the 'de novo' purine nucleotide biosynthetic pathway
YGR080W	R.QGDSSFFIYSC@PSGSK.V	TWF1	3.413	883.887	-0.95	Twinfilin, highly conserved actin monomer-sequestering protein involved in regulation of the cortical actin cytoskeleton, composed of two cofilin-like regions, localizes actin monomers to sites of rapid filament assembly
YGR094W	K.ESYPNGIPQC@GTDAMR.F	VAS1	3	906.388	0.1	Mitochondrial and cytoplasmic valyl-tRNA synthetase
YGR094W	K.NLYVGQEDNEMTIPTC@SR.S	VAS1	5.336	1071.98	0.03	Mitochondrial and cytoplasmic valyl-tRNA synthetase
YGR124W	K.ADWGC@AEDPSGR.Y	ASN2	3.661	660.767	0.27	Asparagine synthetase, isozyme of Asn1p; catalyzes the synthesis of L-asparagine from L-aspartate in the asparagine biosynthetic pathway
YGR124W	K.NLHLADC@LR.A	ASN2	2.507	556.288	0.39	Asparagine synthetase, isozyme of Asn1p; catalyzes the synthesis of L-asparagine from L-aspartate in the asparagine biosynthetic pathway
YGR124W	R.SSQSPETVYFASELK.C	ASN2	4.126	836.907	0.34	Asparagine synthetase, isozyme of Asn1p; catalyzes the synthesis of L-asparagine from L-aspartate in the asparagine biosynthetic pathway
YGR159C	K.EIDGRPINC@DMSTSKPAGNNDR.A	NSR1	2.686	616.53	-0.13	Nucleolar protein that binds nuclear localization sequences, required for pre-rRNA processing and ribosome biogenesis
YGR175C	R.ILC@AYNSPK.V	ERG1	3.098	533.273	-0.34	Squalene epoxidase, catalyzes the epoxidation of squalene to 2,3-oxidosqualene; plays an essential role in the ergosterol-biosynthesis pathway and is the specific target of the antifungal drug terbinafine
YGR181W	R.NDAC@IDQC@LAK.Y	TIM13	4.09	654.29	0.41	Mitochondrial intermembrane space protein, forms a complex with TIm8p that mediates import and insertion of a subset of polytopic inner membrane proteins; may prevent aggregation of incoming proteins in a chaperone-like manner
YGR185C	K.INSAFCSPGNVEE#NGLLSFVQYVIAPIQELK.F	TYS1	3.762	1146.25	-1.07	Cytoplasmic tyrosyl-tRNA synthetase, class I aminoacyl-tRNA synthetase that aminoacylates tRNA(Tyr), required for cytoplasmic protein synthesis, interacts with positions 34 and 35 of the anticodon of tRNATyr
YGR192C	K.I]VSNASC@TTNC@LAPLAK.V	TDH3	5.114	938.966	-0.12	Glyceraldehyde-3-phosphate dehydrogenase, isozyme 3, involved in glycolysis and gluconeogenesis; tetramer that catalyzes the reaction of glyceraldehyde-3-phosphate to 1,3 bis-phosphoglycerate; detected in the cytoplasm and cell-wall
YGR192C	K.IVSNASC@TTNC@LAPLAK.V	TDH3	4.162	910.456	0.31	Glyceraldehyde-3-phosphate dehydrogenase, isozyme 3, involved in glycolysis and gluconeogenesis; tetramer that catalyzes the reaction of glyceraldehyde-3-phosphate to 1,3 bis-phosphoglycerate; detected in the cytoplasm and cell-wall
YGR192C	K.YTSDLKIVSNASC@TTNC@LAPLAK.V	TDH3	3.059	843.089	-0.61	Glyceraldehyde-3-phosphate dehydrogenase, isozyme 3, involved in glycolysis and gluconeogenesis; tetramer that catalyzes the reaction of glyceraldehyde-3-phosphate to 1,3 bis-phosphoglycerate; detected in the cytoplasm and cell-wall
YGR200C	K.GHEAEVTC@VR.F	ELP2	3.121	579.272	-0.41	Subunit of Elongator complex, which is required for modification of wobble nucleosides in tRNA; target of Kluyveromyces lactis zymocin
YGR204W	K.A]CAQQFR.S	ADE3	2.729	440.709	0.46	Cytoplasmic trifunctional enzyme C1-tetrahydrofolate synthase, involved in single carbon metabolism and required for biosynthesis of purines, thymidylate, methionine, and histidine
YGR204W	K.C]VGDVEFNEAIK.Y	ADE3	4.042	690.827	-0.1	Cytoplasmic trifunctional enzyme C1-tetrahydrofolate synthase, involved in single carbon metabolism and required for biosynthesis of purines, thymidylate, methionine, and histidine
YGR204W	K.EQGFGNLPIC@IAK.T	ADE3	2.943	723.874	0.09	Cytoplasmic trifunctional enzyme C1-tetrahydrofolate synthase, involved in single carbon metabolism and required for biosynthesis of purines, thymidylate, methionine, and histidine
YGR207C	K.GIDTC@SLIDSVGK.E	YGR207C	4.363	682.84	0.14	Protein that interacts with frataxin (Yfh1p); putative homolog of mammalian electron transfer flavoprotein complex subunit ETF-beta; authentic, non-tagged protein is detected in highly purified mitochondria in high-throughput studies
YGR208W	K.TLGPIVDGQC@K.S	SER2	2.629	594.308	0.41	Phosphoserine phosphatase of the phosphoglycerate pathway, involved in serine and glycine biosynthesis, expression is regulated by the available nitrogen source
YGR214W	K.EASYVNIPVIALTDLDSPSEFVDVAIPC@NNR.G	RPS0A	4.795	1140.23	-0.5	Protein component of the small (40S) ribosomal subunit, nearly identical to Rps0Bp; required for maturation of 18S rRNA along with Rps0Bp; deletion of either RPS0 gene reduces growth rate, deletion of both genes is lethal
YGR234W	K.C]NPNRPIYWIQSSYDEK.T	YHB1	3.679	724.005	-0.19	Nitric oxide oxidoreductase, flavohemoglobin involved in nitric oxide detoxification; plays a role in the oxidative and nitrosative stress responses
YGR234W	R.HYSLC@SASTK.N	YHB1	2.772	577.269	-0.38	Nitric oxide oxidoreductase, flavohemoglobin involved in nitric oxide detoxification; plays a role in the oxidative and nitrosative stress responses
YGR240C	-.MQSQDSC@YGVAFR.S	PFK1	4.841	782.829	-0.24	Alpha subunit of heterooctameric phosphofructokinase involved in glycolysis, indispensable for anaerobic growth, activated by fructose-2,6-bisphosphate and AMP, mutation inhibits glucose induction of cell cycle-related genes
YGR254W	K.IGLDC@ASSEFFK.D	ENO1	2.929	687.323	-1.07	Enolase I, a phosphopyruvate hydratase that catalyzes the conversion of 2-phosphoglycerate to phosphoenolpyruvate during glycolysis and the reverse reaction during gluconeogenesis; expression is repressed in response to glucose
YGR279C	R.GITYTPYESSGAC@K.S	SCW4	3.832	767.348	-0.55	Cell wall protein with similarity to glucanases; scw4 scw10 double mutants exhibit defects in mating
YGR285C	R.AQYDSC@DFVADVPPPK.K	ZUO1	5.123	904.912	0.62	Cytosolic ribosome-associated chaperone that acts, together with Ssz1p and the Ssb proteins, as a chaperone for nascent polypeptide chains; contains a DnaJ domain and functions as a J-protein partner for Ssb1p and Ssb2p
YGR285C	R.AQYDSCD#FVADVPPPK.K	ZUO1	4.263	904.911	-0.5	Cytosolic ribosome-associated chaperone that acts, together with Ssz1p and the Ssb proteins, as a chaperone for nascent polypeptide chains; contains a DnaJ domain and functions as a J-protein partner for Ssb1p and Ssb2p
YHL001W	K.WAAAGVCE#K.W	RPL14B	3.683	496.237	0.57	Protein component of the large (60S) ribosomal subunit, nearly identical to Rpl14Ap and has similarity to rat L14 ribosomal protein
YHL011C	R.VVC@TNTVPFEEK.I	PRS3	3.894	711.851	0.64	5-phospho-ribosyl-1(alpha)-pyrophosphate synthetase, synthesizes PRPP, which is required for nucleotide, histidine, and tryptophan biosynthesis; one of five related enzymes, which are active as heteromultimeric complexes
YHR007C	K.GVIYDC@PNSR.L	ERG11	2.656	590.774	-1.45	Lanosterol 14-alpha-demethylase, catalyzes the C-14 demethylation of lanosterol to form 4,4''-dimethyl cholesta-8,14,24-triene-3-beta-ol in the ergosterol biosynthesis pathway; member of the cytochrome P450 family
YHR012W	K.IGC@C@SGYTVVPK.N	VPS29	3.531	670.82	-0.36	Endosomal protein that is a subunit of the membrane-associated retromer complex essential for endosome-to-Golgi retrograde transport; forms a subcomplex with Vps35p and Vps26p that selects cargo proteins for endosome-to-Golgi retrieval
YHR019C	K.YGTC@PHGGYGIGTER.I	DED81	4.029	542.244	-0.12	Cytosolic asparaginyl-tRNA synthetase, required for protein synthesis, catalyzes the specific attachment of asparagine to its cognate tRNA
YHR019C	R.ILAWLCD#R.F	DED81	2.6	523.776	0.4	Cytosolic asparaginyl-tRNA synthetase, required for protein synthesis, catalyzes the specific attachment of asparagine to its cognate tRNA
YHR019C	R.VYDEEHLTEVTPPC@MVQTQVEGGSTLFK.M	DED81	3.886	1070.84	-0.48	Cytosolic asparaginyl-tRNA synthetase, required for protein synthesis, catalyzes the specific attachment of asparagine to its cognate tRNA
YHR020W	K.EKFAGGDFTTTC@EGYIPQTGR.G	YHR020W	4.562	779.026	-0.57	Protein of unknown function that may interact with ribosomes, based on co-purification experiments; has similarity to proline-tRNA ligase; YHR020W is an essential gene
YHR020W	K.FAGGDFTTTCE#GYIPQTGR.G	YHR020W	3.289	693.314	-0.05	Protein of unknown function that may interact with ribosomes, based on co-purification experiments; has similarity to proline-tRNA ligase; YHR020W is an essential gene
YHR020W	K.S]LCIPFDQPVLNEGQK.C	YHR020W	3.306	922.964	-0.33	Protein of unknown function that may interact with ribosomes, based on co-purification experiments; has similarity to proline-tRNA ligase; YHR020W is an essential gene
YHR025W	K.YQWNPAIK.C	THR1	2.525	510.269	-0.02	Homoserine kinase, conserved protein required for threonine biosynthesis; expression is regulated by the GCN4-mediated general amino acid control pathway
YHR025W	R.TALYVLR.C	THR1	2.367	418.255	-0.03	Homoserine kinase, conserved protein required for threonine biosynthesis; expression is regulated by the GCN4-mediated general amino acid control pathway
YHR028C	R.K#AEK#C@DK.G	DAP2	1.687	331.499	0.27	Dipeptidyl aminopeptidase, synthesized as a glycosylated precursor; localizes to the vacuolar membrane; similar to Ste13p
YHR037W	K.C]TGAVVSQQWFGGAR.M	PUT2	4.383	812.387	-1.72	Delta-1-pyrroline-5-carboxylate dehydrogenase, nuclear-encoded mitochondrial protein involved in utilization of proline as sole nitrogen source; deficiency of the human homolog causes HPII, an autosomal recessive inborn error of metabolism
YHR039C	K.FGGEEGLLGLC@NAK.S	MSC7	4.392	732.861	-0.77	Protein of unknown function, green fluorescent protein (GFP)-fusion protein localizes to the endoplasmic reticulum; msc7 mutants are defective in directing meiotic recombination events to homologous chromatids
YHR064C	K.C@ANGAPAVEVDGK.V	SSZ1	3.909	644.304	0.06	Hsp70 protein that interacts with Zuo1p (a DnaJ homolog) to form a ribosome-associated complex that binds the ribosome via the Zuo1p subunit; also involved in pleiotropic drug resistance via sequential activation of PDR1 and PDR5; binds ATP
YHR068W	K.HGADC@LEANQDVDSPIWTPSK.M	DYS1	4.681	780.69	-0.36	Deoxyhypusine synthase, catalyzes formation of deoxyhypusine, the first step in hypusine biosynthesis; triggers posttranslational hypusination of translation elongation factor eIF-5A and regulates its intracellular levels; tetrameric
YHR068W	K.KGC@FDEEGYQK.T	DYS1	3.398	680.795	-0.23	Deoxyhypusine synthase, catalyzes formation of deoxyhypusine, the first step in hypusine biosynthesis; triggers posttranslational hypusination of translation elongation factor eIF-5A and regulates its intracellular levels; tetrameric
YHR068W	K.MVDAVVTSAGGVEEDLIK.C	DYS1	4.279	924.967	0.82	Deoxyhypusine synthase, catalyzes formation of deoxyhypusine, the first step in hypusine biosynthesis; triggers posttranslational hypusination of translation elongation factor eIF-5A and regulates its intracellular levels; tetrameric
YHR068W	R.IGNLLVPNDNYC@K.F	DYS1	3.118	760.383	0.29	Deoxyhypusine synthase, catalyzes formation of deoxyhypusine, the first step in hypusine biosynthesis; triggers posttranslational hypusination of translation elongation factor eIF-5A and regulates its intracellular levels; tetrameric
YHR089C	K.C@GDGVQATSFKEGDK.F	GAR1	4.059	533.575	-0.06	Protein component of the H/ACA snoRNP pseudouridylase complex, involved in the modification and cleavage of the 18S pre-rRNA
YHR104W	R.LFDGAC@DYGNEK.E	GRE3	4.263	694.793	-0.29	Aldose reductase involved in methylglyoxal, d-xylose and arabinose metabolism; stress induced (osmotic, ionic, oxidative, heat shock, starvation and heavy metals); regulated by the HOG pathway
YHR143W-A	K.YIC@AECSSK#.L	RPC10	2.439	559.236	-0.48	RNA polymerase subunit, found in RNA polymerase complexes I, II, and III
YHR183W	K.SDGEPC@C@EWVGPAGAGHYVK.M	GND1	3.564	1088.46	-0.13	6-phosphogluconate dehydrogenase (decarboxylating), catalyzes an NADPH regenerating reaction in the pentose phosphate pathway; required for growth on D-glucono-delta-lactone and adaptation to oxidative stress
YHR183W	K.SDGEPC@CE#WVGPAGAGHYVK.M	GND1	2.382	725.979	-0.2	6-phosphogluconate dehydrogenase (decarboxylating), catalyzes an NADPH regenerating reaction in the pentose phosphate pathway; required for growth on D-glucono-delta-lactone and adaptation to oxidative stress
YHR208W	K.KLGANYAPC@ILPQLQAAK.R	BAT1	4.341	652.696	0.52	Mitochondrial branched-chain amino acid aminotransferase, homolog of murine ECA39; highly expressed during logarithmic phase and repressed during stationary phase
YHR208W	K.LGANYAPC@ILPQLQAAK.R	BAT1	3.456	914.493	0.22	Mitochondrial branched-chain amino acid aminotransferase, homolog of murine ECA39; highly expressed during logarithmic phase and repressed during stationary phase
YIL021W	K.NC@EYEDPPNEGDPFDYK.A	RPB3	3.976	1044.91	0.77	RNA polymerase II third largest subunit B44, part of central core; similar to prokaryotic alpha subunit
YIL039W	R.E]GLCVDGPDTR.Y	TED1	3.37	609.775	-0.04	Conserved phosphoesterase domain-containing protein that acts together with Emp24p/Erv25p in cargo exit from the ER; deletion confers sensitivity to 4-(N-(S-glutathionylacetyl)amino) phenylarsenoxide (GSAO)
YIL039W	R.EGLC@VDGPDTR.Y	TED1	3.309	609.775	0.02	Conserved phosphoesterase domain-containing protein that acts together with Emp24p/Erv25p in cargo exit from the ER; deletion confers sensitivity to 4-(N-(S-glutathionylacetyl)amino) phenylarsenoxide (GSAO)
YIL075C	K.FGAC@VAQGIMNAGGR.N	RPN2	4.212	762.856	-0.53	Subunit of the 26S proteasome, substrate of the N-acetyltransferase Nat1p
YIL078W	K.LIDLC@VGPHIPHTGR.I	THS1	2.024	421.979	-0.03	Threonyl-tRNA synthetase, essential cytoplasmic protein
YIL078W	K.NSSC@YFLGDATNDSLQR.V	THS1	5.282	974.428	-0.61	Threonyl-tRNA synthetase, essential cytoplasmic protein
YIL078W	K.VPDGGATTVYR.C	THS1	3.233	568.291	-0.18	Threonyl-tRNA synthetase, essential cytoplasmic protein
YIL116W	K.IYNLEPYR.C	HIS5	2.944	534.28	-0.05	Histidinol-phosphate aminotransferase, catalyzes the seventh step in histidine biosynthesis; responsive to general control of amino acid biosynthesis; mutations cause histidine auxotrophy and sensitivity to Cu, Co, and Ni salts
YIL125W	R.YC@GRNPSGAVAAGSK.S	KGD1	3.806	747.86	0.43	Component of the mitochondrial alpha-ketoglutarate dehydrogenase complex, which catalyzes a key step in the tricarboxylic acid (TCA) cycle, the oxidative decarboxylation of alpha-ketoglutarate to form succinyl-CoA
YIL148W	K.YNC@DKSVC@R.K	RPL40A	2.699	601.258	-0.16	Fusion protein, identical to Rpl40Bp, that is cleaved to yield ubiquitin and a ribosomal protein of the large (60S) ribosomal subunit with similarity to rat L40; ubiquitin may facilitate assembly of the ribosomal protein into ribosomes
YIR006C	K.NISNPENC@YDSSIPSDLTSR.F	PAN1	3.74	1135.01	0.37	Part of actin cytoskeleton-regulatory complex Pan1p-Sla1p-End3p, associates with actin patches on the cell cortex; promotes protein-protein interactions essential for endocytosis; previously thought to be a subunit of poly(A) ribonuclease
YIR034C	R.C@GSGAIDLLHK.V	LYS1	3.249	390.869	0.25	Saccharopine dehydrogenase (NAD+, L-lysine-forming), catalyzes the conversion of saccharopine to L-lysine, which is the final step in the lysine biosynthesis pathway
YJL008C	R.L]C@RVCGATPLPR.L	CCT8	2.62	467.248	0.49	Subunit of the cytosolic chaperonin Cct ring complex, related to Tcp1p, required for the assembly of actin and tubulins in vivo
YJL052W	K.KIVSNASC@TTNC@LAPLAK.V	TDH1	3.766	650.005	0.4	Glyceraldehyde-3-phosphate dehydrogenase, isozyme 1, involved in glycolysis and gluconeogenesis; tetramer that catalyzes the reaction of glyceraldehyde-3-phosphate to 1,3 bis-phosphoglycerate; detected in the cytoplasm and cell-wall
YJL069C	K.IQVGGGTTTTC@PALQISK.I	UTP18	5.522	916.482	-0.49	Possible U3 snoRNP protein involved in maturation of pre-18S rRNA, based on computational analysis of large-scale protein-protein interaction data
YJL080C	K.FAC@QIDIPNEENNNASK.D	SCP160	3.923	982.444	-0.53	Essential RNA-binding G protein effector of mating response pathway, mainly associated with nuclear envelope and ER, interacts in mRNA-dependent manner with translating ribosomes via multiple KH domains, similar to vertebrate vigilins
YJL080C	K.FAC@QIDIPNEENNNASKDK.T	SCP160	3.441	736.339	-0.14	Essential RNA-binding G protein effector of mating response pathway, mainly associated with nuclear envelope and ER, interacts in mRNA-dependent manner with translating ribosomes via multiple KH domains, similar to vertebrate vigilins
YJL080C	K.LTKPINAVIEVPSK.C	SCP160	3.603	503.64	0.38	Essential RNA-binding G protein effector of mating response pathway, mainly associated with nuclear envelope and ER, interacts in mRNA-dependent manner with translating ribosomes via multiple KH domains, similar to vertebrate vigilins
YJL080C	K.V]CGSTEGENAEK.T	SCP160	2.037	640.775	-0.13	Essential RNA-binding G protein effector of mating response pathway, mainly associated with nuclear envelope and ER, interacts in mRNA-dependent manner with translating ribosomes via multiple KH domains, similar to vertebrate vigilins
YJL080C	K.VC@GSTEGENAEK.T	SCP160	2.113	640.775	0.01	Essential RNA-binding G protein effector of mating response pathway, mainly associated with nuclear envelope and ER, interacts in mRNA-dependent manner with translating ribosomes via multiple KH domains, similar to vertebrate vigilins
YJL080C	K.VCGSTEGE#NAEK.T	SCP160	1.574	640.775	0.14	Essential RNA-binding G protein effector of mating response pathway, mainly associated with nuclear envelope and ER, interacts in mRNA-dependent manner with translating ribosomes via multiple KH domains, similar to vertebrate vigilins
YJL121C	K.C]GADQFTFHYEATQDPLHLVK.L	RPE1	5.262	620.044	-0.36	D-ribulose-5-phosphate 3-epimerase, catalyzes a reaction in the non-oxidative part of the pentose-phosphate pathway; mutants are sensitive to oxidative stress
YJL121C	K.WVDDFAK.C	RPE1	2.448	440.714	0.18	D-ribulose-5-phosphate 3-epimerase, catalyzes a reaction in the non-oxidative part of the pentose-phosphate pathway; mutants are sensitive to oxidative stress
YJL130C	K.C]IVNPSPASITASAELQSTSAK.R	URA2	3.686	1116.56	0.29	Bifunctional carbamoylphosphate synthetase (CPSase)-aspartate transcarbamylase (ATCase), catalyzes the first two enzymatic steps in the de novo biosynthesis of pyrimidines; both activities are subject to feedback inhibition by UTP
YJL130C	K.S]TCAC@FEPSLDYC@VVK.M	URA2	5.232	968.417	-1.12	Bifunctional carbamoylphosphate synthetase (CPSase)-aspartate transcarbamylase (ATCase), catalyzes the first two enzymatic steps in the de novo biosynthesis of pyrimidines; both activities are subject to feedback inhibition by UTP
YJL136C	K.GQLVELYVPRK.C	RPS21B	2.259	434.591	0.18	Protein component of the small (40S) ribosomal subunit; nearly identical to Rps21Ap and has similarity to rat S21 ribosomal protein
YJL167W	K.E#ACDWYAHSLNYNTPGGK.L	ERG20	5.743	1041.95	-0.71	Farnesyl pyrophosphate synthetase, has both dimethylallyltranstransferase and geranyltranstransferase activities; catalyzes the formation of C15 farnesyl pyrophosphate units for isoprenoid and sterol biosynthesis
YJL167W	K.EAC@DWYAHSLNYNTPGGK.L	ERG20	5.475	1041.95	-0.71	Farnesyl pyrophosphate synthetase, has both dimethylallyltranstransferase and geranyltranstransferase activities; catalyzes the formation of C15 farnesyl pyrophosphate units for isoprenoid and sterol biosynthesis
YJL167W	K.IGTDIQDNK.C	ERG20	3.108	502.257	0.61	Farnesyl pyrophosphate synthetase, has both dimethylallyltranstransferase and geranyltranstransferase activities; catalyzes the formation of C15 farnesyl pyrophosphate units for isoprenoid and sterol biosynthesis
YJL167W	K.IGTDIQDNKC@SWVINK.A	ERG20	3.426	630.984	-0.39	Farnesyl pyrophosphate synthetase, has both dimethylallyltranstransferase and geranyltranstransferase activities; catalyzes the formation of C15 farnesyl pyrophosphate units for isoprenoid and sterol biosynthesis
YJL167W	R.DVLIPLGEYFQIQDDYLDC@FGTPEQIGK.I	ERG20	3.423	1091.86	0.15	Farnesyl pyrophosphate synthetase, has both dimethylallyltranstransferase and geranyltranstransferase activities; catalyzes the formation of C15 farnesyl pyrophosphate units for isoprenoid and sterol biosynthesis
YJL172W	K.C]EKIEPLSPSFK.H	CPS1	2.964	478.915	-0.02	Vacuolar carboxypeptidase yscS; expression is induced under low-nitrogen conditions
YJL172W	K.TILGAPFC@PR.R	CPS1	2.623	566.303	0.49	Vacuolar carboxypeptidase yscS; expression is induced under low-nitrogen conditions
YJL200C	K.ELKTNVLLK#VE#GK#.C	ACO2	2.714	411.244	-0.33	Putative mitochondrial aconitase isozyme; similarity to Aco1p, an aconitase required for the TCA cycle; expression induced during growth on glucose, by amino acid starvation via Gcn4p, and repressed on ethanol
YJR007W	K.YGGVC@NITMPPK.A	SUI2	3.816	676.821	0.55	Alpha subunit of the translation initiation factor eIF2, involved in the identification of the start codon; phosphorylation of Ser51 is required for regulation of translation by inhibiting the exchange of GDP for GTP
YJR016C	K.EKLAEC@DNIGEYIKK.T	ILV3	3.5	603.974	0.57	Dihydroxyacid dehydratase, catalyzes third step in the common pathway leading to biosynthesis of branched-chain amino acids
YJR016C	K.LAEC@DNIGEYIKK.T	ILV3	2.653	518.26	-0.44	Dihydroxyacid dehydratase, catalyzes third step in the common pathway leading to biosynthesis of branched-chain amino acids
YJR016C	K.LVSNASNGC@VLDA.-	ILV3	4.033	660.317	0.37	Dihydroxyacid dehydratase, catalyzes third step in the common pathway leading to biosynthesis of branched-chain amino acids
YJR063W	K.C@PQC@GNEEMNYHTLQLR.S	RPA12	3.987	717.312	-0.45	RNA polymerase I subunit A12.2; contains two zinc binding domains, and the N terminal domain is responsible for anchoring to the RNA pol I complex
YJR063W	R.SADEGATVFYTC@TSCGY#K.F	RPA12	5.486	1008.92	-1.01	RNA polymerase I subunit A12.2; contains two zinc binding domains, and the N terminal domain is responsible for anchoring to the RNA pol I complex
YJR065C	K.IKQEYC@YVC@PDIVK.E	ARP3	3.291	605.631	-1.64	Essential component of the Arp2/3 complex, which is a highly conserved actin nucleation center required for the motility and integrity of actin patches; involved in endocytosis and membrane growth and polarity
YJR070C	R.ETC@ELAINR.I	LIA1	2.946	553.269	-0.32	Deoxyhypusine hydroxylase, a HEAT-repeat containing metalloenzyme that catalyses hypusine formation; binds to and is required for the modification of Hyp2p (eIF5A); complements S. pombe mmd1 mutants defective in mitochondrial positioning
YJR092W	K.TSAEEHDLSSSC@EDQSVSEAR.N	BUD4	4.347	775.324	0.45	Protein involved in bud-site selection and required for axial budding pattern; localizes with septins to bud neck in mitosis and may constitute an axial landmark for next round of budding; potential Cdc28p substrate
YJR094W-A	R.GAAGIWTC@SC@C@KK.T	RPL43B	3.942	749.833	-0.35	Protein component of the large (60S) ribosomal subunit, identical to Rpl43Ap and has similarity to rat L37a ribosomal protein
YJR094W-A	R.YDC@SFC@GK.K	RPL43B	2.405	518.697	0.08	Protein component of the large (60S) ribosomal subunit, identical to Rpl43Ap and has similarity to rat L37a ribosomal protein
YJR096W	K.FLDHPDAYEPTDWEC@TDAP.-	YJR096W	3.959	1139.97	0.59	Putative xylose and arabinose reductase; member of the aldo-keto reductase (AKR) family; GFP-fusion protein is induced in response to the DNA-damaging agent MMS
YJR104C	K.TGNAGPRPAC@GVIGLTN.-	SOD1	3.725	827.92	0.16	Cytosolic superoxide dismutase; some mutations are analogous to those that cause ALS (amyotrophic lateral sclerosis) in humans
YJR105W	K.C@AALITGHNR.S	ADO1	3.373	556.785	-0.31	Adenosine kinase, required for the utilization of S-adenosylmethionine (AdoMet); may be involved in recycling adenosine produced through the methyl cycle
YJR105W	K.SMYQVQNDIGTGK.C	ADO1	4.681	728.84	-0.54	Adenosine kinase, required for the utilization of S-adenosylmethionine (AdoMet); may be involved in recycling adenosine produced through the methyl cycle
YJR109C	K.LYDNGCNIMGTNPND#IDRAENR.H	CPA2	3.258	856.711	-0.81	Large subunit of carbamoyl phosphate synthetase, which catalyzes a step in the synthesis of citrulline, an arginine precursor
YJR123W	K.AQC@PIIER.L	RPS5	2.467	493.758	-0.11	Protein component of the small (40S) ribosomal subunit, the least basic of the non-acidic ribosomal proteins; phosphorylated in vivo; essential for viability; has similarity to E. coli S7 and rat S5 ribosomal proteins
YJR144W	R.GEQDYFNEAGIPTATEGCK#.S	MGM101	4.361	1043.95	-1.28	Protein involved in mitochondrial genome maintenance; component of the mitochondrial nucleoid, required for the repair of oxidative mtDNA damage
YJR148W	K.KLGANYAPC@VLPQLQAASR.G	BAT2	3.22	686.371	1.08	Cytosolic branched-chain amino acid aminotransferase, homolog of murine ECA39; highly expressed during stationary phase and repressed during logarithmic phase
YJR148W	K.LGANYAPC@VLPQLQAASR.G	BAT2	4.25	965.005	0.56	Cytosolic branched-chain amino acid aminotransferase, homolog of murine ECA39; highly expressed during stationary phase and repressed during logarithmic phase
YJR148W	R.IC@LPTFDPEELITLIGK.L	BAT2	3.183	980.029	-0.01	Cytosolic branched-chain amino acid aminotransferase, homolog of murine ECA39; highly expressed during stationary phase and repressed during logarithmic phase
YKL006W	K.WAAAAVC@EK.W	RPL14A	3.797	503.245	0.11	N-terminally acetylated protein component of the large (60S) ribosomal subunit, nearly identical to Rpl14Bp and has similarity to rat L14 ribosomal protein; rpl14a csh5 double null mutant exhibits synthetic slow growth
YKL029C	R.DFDEC@LQWVK.A	MAE1	3.213	670.303	-0.46	Mitochondrial malic enzyme, catalyzes the oxidative decarboxylation of malate to pyruvate, which is a key intermediate in sugar metabolism and a precursor for synthesis of several amino acids
YKL033W-A	K.NIPIALC@TSSNK.T	YKL033W-A	2.617	659.345	-0.09	Putative protein of unknown function; similar to uncharacterized proteins from other fungi
YKL035W	K.LNGGLGTSMGC@VGPK.S	UGP1	4.422	732.352	-0.29	UDP-glucose pyrophosphorylase (UGPase), catalyses the reversible formation of UDP-Glc from glucose 1-phosphate and UTP, involved in a wide variety of metabolic pathways, expression modulated by Pho85p through Pho4p
YKL060C	K.VNLDTDC@QYAYLTGIR.D	FBA1	5.87	951.456	-0.36	Fructose 1,6-bisphosphate aldolase, required for glycolysis and gluconeogenesis; catalyzes conversion of fructose 1,6 bisphosphate to glyceraldehyde-3-P and dihydroxyacetone-P; locates to mitochondrial outer surface upon oxidative stress
YKL060C	R.SIAPAYGIPVVLHSDHC@AK.K	FBA1	2.178	509.516	0.29	Fructose 1,6-bisphosphate aldolase, required for glycolysis and gluconeogenesis; catalyzes conversion of fructose 1,6 bisphosphate to glyceraldehyde-3-P and dihydroxyacetone-P; locates to mitochondrial outer surface upon oxidative stress
YKL067W	R.NVCH#GSDSVDSAER.E	YNK1	2.353	511.551	-0.1	Nucleoside diphosphate kinase, catalyzes the transfer of gamma phosphates from nucleoside triphosphates, usually ATP, to nucleoside diphosphates by a mechanism that involves formation of an autophosphorylated enzyme intermediate
YKL077W	R.SEPFC@TPYENSR.W	YKL077W	1.977	743.817	-0.02	Putative protein of unknown function; green fluorescent protein (GFP)-fusion protein localizes to the vacuole
YKL081W	K.DVDAC@FVK.I	TEF4	2.538	477.224	0.26	Translation elongation factor EF-1 gamma
YKL085W	K.IHPIGELSSEEEEMLQK.C	MDH1	4.455	656.99	-0.7	Mitochondrial malate dehydrogenase, catalyzes interconversion of malate and oxaloacetate; involved in the tricarboxylic acid (TCA) cycle; phosphorylated
YKL094W	K.FIQDC@PSADK.E	YJU3	2.839	590.769	-0.24	Serine hydrolase with sequence similarity to monoglyceride lipase (MGL), localizes to lipid particles
YKL103C	K.SALVDSTPLPVC@R.I	LAP4	3.556	707.872	0.2	Vacuolar aminopeptidase, often used as a marker protein in studies of autophagy and cytosol to vacuole targeting (CVT) pathway
YKL145W	R.LGEEHPLQVAR.C	RPT1	2.45	416.894	-0.72	One of six ATPases of the 19S regulatory particle of the 26S proteasome involved in the degradation of ubiquitinated substrates; required for optimal CDC20 transcription; interacts with Rpn12p and the E3 ubiquitin-protein ligase Ubr1p
YKL157W	K.MFTDYC@SGNK.E	APE2	2.646	611.747	-0.31	Zinc-dependent metallopeptidase yscII, may have a role in obtaining leucine from dipeptide substrates; sequence coordinates have changed since RT-PCR analysis showed that the adjacent ORF YKL158W comprises the 5' exon of APE2/YKL157W
YKL168C	R.FAGADVQCIIE#QNGFKVYED#GSHEHNIK.L	KKQ8	2.727	816.384	-2.1	Putative serine/threonine protein kinase with unknown cellular role
YKL181W	K.IFVGNSHPELGNMVC@QR.L	PRS1	2.573	653.317	-0.89	5-phospho-ribosyl-1(alpha)-pyrophosphate synthetase, synthesizes PRPP, which is required for nucleotide, histidine, and tryptophan biosynthesis; one of five related enzymes, which are active as heteromultimeric complexes
YKL182W	K.C@FGPIKVELPTK.E	FAS1	2.891	463.592	0.14	Beta subunit of fatty acid synthetase, which catalyzes the synthesis of long-chain saturated fatty acids; contains acetyltransacylase, dehydratase, enoyl reductase, malonyl transacylase, and palmitoyl transacylase activities
YKL182W	K.EVYDFTHAVGNNC@EDFVSRPDR.T	FAS1	3.417	876.391	-0.1	Beta subunit of fatty acid synthetase, which catalyzes the synthesis of long-chain saturated fatty acids; contains acetyltransacylase, dehydratase, enoyl reductase, malonyl transacylase, and palmitoyl transacylase activities
YKL182W	K.NANIFSSVK.C	FAS1	2.815	490.264	-0.46	Beta subunit of fatty acid synthetase, which catalyzes the synthesis of long-chain saturated fatty acids; contains acetyltransacylase, dehydratase, enoyl reductase, malonyl transacylase, and palmitoyl transacylase activities
YKL182W	R.TC@ILHGPVAAQFTK.V	FAS1	3.26	514.941	0.03	Beta subunit of fatty acid synthetase, which catalyzes the synthesis of long-chain saturated fatty acids; contains acetyltransacylase, dehydratase, enoyl reductase, malonyl transacylase, and palmitoyl transacylase activities
YKL210W	K.INEFC@HSSGIR.F	UBA1	2.249	440.543	-0.14	Ubiquitin activating enzyme (E1), involved in ubiquitin-mediated protein degradation and essential for viability
YKL214C	R.TC@IYEFEDPEVLEK.I	YRA2	3.979	886.409	0.54	Member of the REF (RNA and export factor binding proteins) family; when overexpressed, can substitute for the function of Yra1p in export of poly(A)+ mRNA from the nucleus
YKR043C	R.D#GCENGETTQQIGLR.L	YKR043C	4.911	839.379	0.64	Putative protein of unknown function; green fluorescent protein (GFP)-fusion protein localizes to the cytoplasm and nucleus
YKR080W	K.C@SLDSDVVITGVPSENYK.F	MTD1	2.909	991.972	-0.41	NAD-dependent 5,10-methylenetetrahydrafolate dehydrogenase, plays a catalytic role in oxidation of cytoplasmic one-carbon units; expression is regulated by Bas1p and Bas2p, repressed by adenine, and may be induced by inositol and choline
YKR080W	K.HHVEDLGEYSEDLLKK.C	MTD1	3.336	478.741	-1.17	NAD-dependent 5,10-methylenetetrahydrafolate dehydrogenase, plays a catalytic role in oxidation of cytoplasmic one-carbon units; expression is regulated by Bas1p and Bas2p, repressed by adenine, and may be induced by inositol and choline
YLL026W	K.SNPC@LIGEPGIGK.T	HSP104	3.569	671.345	-0.13	Heat shock protein that cooperates with Ydj1p (Hsp40) and Ssa1p (Hsp70) to refold and reactivate previously denatured, aggregated proteins; responsive to stresses including: heat, ethanol, and sodium arsenite; involved in [PSI+] propagation
YLL029W	R.C]LNTSTNANGAIAK.K	FRA1	3.693	717.854	0.1	Protein involved in negative regulation of transcription of iron regulon; forms an iron independent complex with Fra2p, Grx3p, and Grx4p; cytosolic; mutant fails to repress transcription of iron regulon and is defective in spore formation
YLR027C	K.LSTVSPVFVC@QSFAK.N	AAT2	3.648	835.434	-0.54	Cytosolic aspartate aminotransferase, involved in nitrogen metabolism; localizes to peroxisomes in oleate-grown cells
YLR027C	R.V]GCFHLALTK.Q	AAT2	2.409	382.543	-0.29	Cytosolic aspartate aminotransferase, involved in nitrogen metabolism; localizes to peroxisomes in oleate-grown cells
YLR028C	K.YC@ILQIDPNYVPGQMESR.E	ADE16	4.534	1100.01	-0.5	Enzyme of 'de novo' purine biosynthesis containing both 5-aminoimidazole-4-carboxamide ribonucleotide transformylase and inosine monophosphate cyclohydrolase activities, isozyme of Ade17p; ade16 ade17 mutants require adenine and histidine
YLR028C	K.YTQSNSVC@YAK.N	ADE16	3.693	660.798	-0.21	Enzyme of 'de novo' purine biosynthesis containing both 5-aminoimidazole-4-carboxamide ribonucleotide transformylase and inosine monophosphate cyclohydrolase activities, isozyme of Ade17p; ade16 ade17 mutants require adenine and histidine
YLR029C	R.YNWIC@DPVHK.H	RPL15A	3.509	666.313	-0.7	Protein component of the large (60S) ribosomal subunit, nearly identical to Rpl15Bp and has similarity to rat L15 ribosomal protein; binds to 5.8 S rRNA
YLR044C	K.DAKNPVILADAC@C@SR.H	PDC1	4.323	845.406	-0.46	Major of three pyruvate decarboxylase isozymes, key enzyme in alcoholic fermentation, decarboxylates pyruvate to acetaldehyde; subject to glucose-, ethanol-, and autoregulation; involved in amino acid catabolism
YLR044C	K.NPVILADAC@C@SR.H	PDC1	4.966	688.327	0.27	Major of three pyruvate decarboxylase isozymes, key enzyme in alcoholic fermentation, decarboxylates pyruvate to acetaldehyde; subject to glucose-, ethanol-, and autoregulation; involved in amino acid catabolism
YLR044C	K.NPVILADACC@SRH#DVK.A	PDC1	3.054	618.97	-0.15	Major of three pyruvate decarboxylase isozymes, key enzyme in alcoholic fermentation, decarboxylates pyruvate to acetaldehyde; subject to glucose-, ethanol-, and autoregulation; involved in amino acid catabolism
YLR044C	R.MSANISETTAMITD#IATAPAEIDR.C	PDC1	2.18	860.416	-0.04	Major of three pyruvate decarboxylase isozymes, key enzyme in alcoholic fermentation, decarboxylates pyruvate to acetaldehyde; subject to glucose-, ethanol-, and autoregulation; involved in amino acid catabolism
YLR044C	R.MSANISETTAMITDIATAPAEIDR.C	PDC1	3.706	852.071	-0.99	Major of three pyruvate decarboxylase isozymes, key enzyme in alcoholic fermentation, decarboxylates pyruvate to acetaldehyde; subject to glucose-, ethanol-, and autoregulation; involved in amino acid catabolism
YLR058C	K.GVDGARVEYIC@EK.I	SHM2	3.881	748.365	1.12	Cytosolic serine hydroxymethyltransferase, converts serine to glycine plus 5,10 methylenetetrahydrofolate; major isoform involved in generating precursors for purine, pyrimidine, amino acid, and lipid biosynthesis
YLR058C	K.VLVAGTSAYC@R.L	SHM2	3.293	598.808	0.24	Cytosolic serine hydroxymethyltransferase, converts serine to glycine plus 5,10 methylenetetrahydrofolate; major isoform involved in generating precursors for purine, pyrimidine, amino acid, and lipid biosynthesis
YLR058C	R.MEILC@QQR.A	SHM2	3.033	539.263	0.19	Cytosolic serine hydroxymethyltransferase, converts serine to glycine plus 5,10 methylenetetrahydrofolate; major isoform involved in generating precursors for purine, pyrimidine, amino acid, and lipid biosynthesis
YLR060W	R.YC@DEPFTVEPVEIVSEHNGQSR.L	FRS1	4.372	864.727	-0.03	Beta subunit of cytoplasmic phenylalanyl-tRNA synthetase, forms a tetramer with Frs2p to generate active enzyme; sequence is evolutionarily distant from mitochondrial phenylalanyl-tRNA synthetase (Msf1p), but substrate binding is similar
YLR075W	K.ATVDEFPLC@VHLVSNELEQLSSEALEAAR.I	RPL10	4.131	1076.53	-1.22	Protein component of the large (60S) ribosomal subunit, responsible for joining the 40S and 60S subunits; regulates translation initiation; has similarity to rat L10 ribosomal protein and to members of the QM gene family
YLR075W	K.MLSC@AGADR.L	RPL10	2.972	490.718	-0.03	Protein component of the large (60S) ribosomal subunit, responsible for joining the 40S and 60S subunits; regulates translation initiation; has similarity to rat L10 ribosomal protein and to members of the QM gene family
YLR075W	K.MLSC@AGADRLQQGMR.G	RPL10	3.917	847.4	-0.54	Protein component of the large (60S) ribosomal subunit, responsible for joining the 40S and 60S subunits; regulates translation initiation; has similarity to rat L10 ribosomal protein and to members of the QM gene family
YLR109W	K.FASDPGC@AFTK.S	AHP1	2.82	600.771	0.24	Thiol-specific peroxiredoxin, reduces hydroperoxides to protect against oxidative damage; function in vivo requires covalent conjugation to Urm1p
YLR109W	K.FQYIAISQSDADSESC@K.M	AHP1	5.53	974.933	-0.18	Thiol-specific peroxiredoxin, reduces hydroperoxides to protect against oxidative damage; function in vivo requires covalent conjugation to Urm1p
YLR109W	K.FQYIAISQSDADSESC@KMPQTVEWSK.L	AHP1	3.683	1017.79	-0.49	Thiol-specific peroxiredoxin, reduces hydroperoxides to protect against oxidative damage; function in vivo requires covalent conjugation to Urm1p
YLR109W	K.FQYIAISQSDADSESCK#MPQTVEWSK.L	AHP1	4.587	763.597	-1.36	Thiol-specific peroxiredoxin, reduces hydroperoxides to protect against oxidative damage; function in vivo requires covalent conjugation to Urm1p
YLR126C	R.QC@QELDNNGIQAAR.N	YLR126C	4.464	808.876	-0.25	Putative protein of unknown function with similarity to glutamine amidotransferase proteins; has Aft1p-binding motif in the promoter; may be involved in copper and iron homeostasis; YLR126C is not an essential protein
YLR153C	K.LNASYNC@VDR.H	ACS2	3.08	606.277	0.19	Acetyl-coA synthetase isoform which, along with Acs1p, is the nuclear source of acetyl-coA for histone acetylation; mutants affect global transcription; required for growth on glucose; expressed under anaerobic conditions
YLR153C	K.VVITC@DEGKR.G	ACS2	2.536	588.806	0.96	Acetyl-coA synthetase isoform which, along with Acs1p, is the nuclear source of acetyl-coA for histone acetylation; mutants affect global transcription; required for growth on glucose; expressed under anaerobic conditions
YLR167W	K.LRREC@SNPTC@GAGVFLANHK.D	RPS31	3.284	572.535	0.04	Fusion protein that is cleaved to yield a ribosomal protein of the small (40S) subunit and ubiquitin; ubiquitin may facilitate assembly of the ribosomal protein into ribosomes; interacts genetically with translation factor eIF2B
YLR167W	R.R]ECSNPTC@GAGVFLANHK.D	RPS31	5.858	673.316	0.33	Fusion protein that is cleaved to yield a ribosomal protein of the small (40S) subunit and ubiquitin; ubiquitin may facilitate assembly of the ribosomal protein into ribosomes; interacts genetically with translation factor eIF2B
YLR175W	K.DSAVNAVC@YGAK.L	CBF5	4.297	627.792	-1.28	Pseudouridine synthase catalytic subunit of box H/ACA small nucleolar ribonucleoprotein particles (snoRNPs), acts on both large and small rRNAs and on snRNA U2
YLR179C	R.YVFFLC@K.Q	YLR179C	1.966	488.752	0.03	Protein of unknown function, transcription is activated by paralogous proteins Yrm1p and Yrr1p along with proteins involved in multidrug resistance; GFP-tagged protein localizes to the cytoplasm and nucleus; YLR179C is not essential
YLR180W	K.T]CNVLVAIEQQSPDIAQGVHEEK.D	SAM1	3.921	855.76	1.88	S-adenosylmethionine synthetase, catalyzes transfer of the adenosyl group of ATP to the sulfur atom of methionine; one of two differentially regulated isozymes (Sam1p and Sam2p)
YLR185W	K.TC@SSC@GYPAAK.T	RPL37A	3.207	601.253	0.26	Protein component of the large (60S) ribosomal subunit, has similarity to Rpl37Bp and to rat L37 ribosomal protein
YLR197W	R.QLYDYLC@EK.M	SIK1	2.751	616.287	0.21	Essential evolutionarily-conserved nucleolar protein component of the box C/D snoRNP complexes that direct 2'-O-methylation of pre-rRNA during its maturation; overexpression causes spindle orientation defects
YLR216C	K.LC@EGNAGMAK.T	CPR6	3.076	525.739	0.09	Peptidyl-prolyl cis-trans isomerase (cyclophilin), catalyzes the cis-trans isomerization of peptide bonds N-terminal to proline residues; binds to Hsp82p and contributes to chaperone activity
YLR216C	R.LIENQQC@DQENNKPLR.D	CPR6	2.526	666.994	0.05	Peptidyl-prolyl cis-trans isomerase (cyclophilin), catalyzes the cis-trans isomerization of peptide bonds N-terminal to proline residues; binds to Hsp82p and contributes to chaperone activity
YLR216C	R.LIENQQCD#QENNKPLRDVK.I	CPR6	3.187	781.057	-0.23	Peptidyl-prolyl cis-trans isomerase (cyclophilin), catalyzes the cis-trans isomerization of peptide bonds N-terminal to proline residues; binds to Hsp82p and contributes to chaperone activity
YLR229C	K.YVEC@SALTQR.G	CDC42	3.066	613.795	-0.28	Small rho-like GTPase, essential for establishment and maintenance of cell polarity; mutants have defects in the organization of actin and septins
YLR244C	K.C@PVC@LK.Q	MAP1	2.326	388.693	-0.3	Methionine aminopeptidase, catalyzes the cotranslational removal of N-terminal methionine from nascent polypeptides; function is partially redundant with that of Map2p
YLR249W	K.EIEEHC@SMLGLDPEIVSHSR.I	YEF3	4.329	780.031	-0.28	Translational elongation factor 3, stimulates the binding of aminoacyl-tRNA (AA-tRNA) to ribosomes by releasing EF-1 alpha from the ribosomal complex; contains two ABC cassettes; binds and hydrolyses ATP
YLR249W	K.SAVIIDNMC@K.L	YEF3	2.947	583.781	-0.09	Translational elongation factor 3, stimulates the binding of aminoacyl-tRNA (AA-tRNA) to ribosomes by releasing EF-1 alpha from the ribosomal complex; contains two ABC cassettes; binds and hydrolyses ATP
YLR249W	K.VTNMEFQYPGTSKPQITDINFQC@SLSSR.I	YEF3	3.961	1088.85	-0.39	Translational elongation factor 3, stimulates the binding of aminoacyl-tRNA (AA-tRNA) to ribosomes by releasing EF-1 alpha from the ribosomal complex; contains two ABC cassettes; binds and hydrolyses ATP
YLR249W	R.AIANGQVDGFPTQEEC@R.T	YEF3	5.222	946.434	0.03	Translational elongation factor 3, stimulates the binding of aminoacyl-tRNA (AA-tRNA) to ribosomes by releasing EF-1 alpha from the ribosomal complex; contains two ABC cassettes; binds and hydrolyses ATP
YLR249W	R.KEIE#EHCSMLGLDPEIVSHSR.I	YEF3	3.314	617.299	-0.02	Translational elongation factor 3, stimulates the binding of aminoacyl-tRNA (AA-tRNA) to ribosomes by releasing EF-1 alpha from the ribosomal complex; contains two ABC cassettes; binds and hydrolyses ATP
YLR249W	R.KEIEEHC@SMLGLDPEIVSHSR.I	YEF3	3.528	621.298	0.03	Translational elongation factor 3, stimulates the binding of aminoacyl-tRNA (AA-tRNA) to ribosomes by releasing EF-1 alpha from the ribosomal complex; contains two ABC cassettes; binds and hydrolyses ATP
YLR249W	R.KSAVIIDNMC@K.L	YEF3	2.779	639.831	-0.23	Translational elongation factor 3, stimulates the binding of aminoacyl-tRNA (AA-tRNA) to ribosomes by releasing EF-1 alpha from the ribosomal complex; contains two ABC cassettes; binds and hydrolyses ATP
YLR249W	R.RYGIC@GPNGC@GK.S	YEF3	4.253	669.806	-0.02	Translational elongation factor 3, stimulates the binding of aminoacyl-tRNA (AA-tRNA) to ribosomes by releasing EF-1 alpha from the ribosomal complex; contains two ABC cassettes; binds and hydrolyses ATP
YLR249W	R.YGIC@GPNGC@GK.S	YEF3	3.396	591.755	0	Translational elongation factor 3, stimulates the binding of aminoacyl-tRNA (AA-tRNA) to ribosomes by releasing EF-1 alpha from the ribosomal complex; contains two ABC cassettes; binds and hydrolyses ATP
YLR259C	K.NVAAGC@NPMDLRR.G	HSP60	3.104	737.356	0.38	Tetradecameric mitochondrial chaperonin required for ATP-dependent folding of precursor polypeptides and complex assembly; prevents aggregation and mediates protein refolding after heat shock; role in mtDNA transmission; phosphorylated
YLR270W	R.IVQPYIEEMC@NNGR.L	DCS1	2.754	869.898	-0.56	Non-essential hydrolase involved in mRNA decapping, may function in a feedback mechanism to regulate deadenylation, contains pyrophosphatase activity and a HIT (histidine triad) motif; interacts with neutral trehalase Nth1p
YLR287C	K.IFNAC@DSLSNC@SK.A	YLR287C	4.114	758.331	-1.41	Putative protein of unknown function; green fluorescent protein (GFP)-fusion protein localizes to the cytoplasm; YLR287C is not an essential gene
YLR300W	R.KYPNQC@GTISN.-	EXG1	3.264	641.297	-1.19	Major exo-1,3-beta-glucanase of the cell wall, involved in cell wall beta-glucan assembly; exists as three differentially glycosylated isoenzymes
YLR300W	R.YDGSWVNGDQTSSYIGSC@ANNDDIAYWSDERK.E	EXG1	4.861	1225.18	-1.95	Major exo-1,3-beta-glucanase of the cell wall, involved in cell wall beta-glucan assembly; exists as three differentially glycosylated isoenzymes
YLR300W	R.YDGSWVNGDQTSSYIGSCANND#DIAYWSDERK.E	EXG1	4.709	1225.18	-1.95	Major exo-1,3-beta-glucanase of the cell wall, involved in cell wall beta-glucan assembly; exists as three differentially glycosylated isoenzymes
YLR301W	K.NWD#SGCVEETGAVYPFGADKESVSFR.E	YLR301W	4.608	969.767	-1.25	Protein of unknown function that interacts with Sec72p
YLR304C	K.EFGGIVLANAC@GPCIGQWD#RR.D	ACO1	2.29	792.716	0.08	Aconitase, required for the tricarboxylic acid (TCA) cycle and also independently required for mitochondrial genome maintenance; phosphorylated; component of the mitochondrial nucleoid; mutation leads to glutamate auxotrophy
YLR304C	R.VGLIGSC@TNSSYEDMSR.S	ACO1	5.19	946.411	-0.58	Aconitase, required for the tricarboxylic acid (TCA) cycle and also independently required for mitochondrial genome maintenance; phosphorylated; component of the mitochondrial nucleoid; mutation leads to glutamate auxotrophy
YLR314C	K.C]NLIPVIAK.S	CDC3	2.28	514.302	-0.54	Component of the septin ring of the mother-bud neck that is required for cytokinesis; septins recruit proteins to the neck and can act as a barrier to diffusion at the membrane, and they comprise the 10nm filaments seen with EM
YLR314C	K.FMQSVYEK.C	CDC3	2.39	516.247	-0.56	Component of the septin ring of the mother-bud neck that is required for cytokinesis; septins recruit proteins to the neck and can act as a barrier to diffusion at the membrane, and they comprise the 10nm filaments seen with EM
YLR355C	K.YGMDYMYDAC@STTAR.R	ILV5	3.915	918.847	-0.74	Acetohydroxyacid reductoisomerase, mitochondrial protein involved in branched-chain amino acid biosynthesis, also required for maintenance of wild-type mitochondrial DNA and found in mitochondrial nucleoids
YLR388W	K.YGLNIC@R.Q	RPS29A	2.17	448.226	0.06	Protein component of the small (40S) ribosomal subunit; nearly identical to Rps29Bp and has similarity to rat S29 and E. coli S14 ribosomal proteins
YLR388W	R.KYGLNIC@R.Q	RPS29A	2.314	512.274	0.45	Protein component of the small (40S) ribosomal subunit; nearly identical to Rps29Bp and has similarity to rat S29 and E. coli S14 ribosomal proteins
YLR390W-A	K.C@LDSIC@PNNDADAAYSAFK.S	CCW14	5.644	1066.46	-1.44	Covalently linked cell wall glycoprotein, present in the inner layer of the cell wall
YLR420W	R.EGAMC@ELVTPK.I	URA4	3.465	617.794	-0.16	Dihydroorotase, catalyzes the third enzymatic step in the de novo biosynthesis of pyrimidines, converting carbamoyl-L-aspartate into dihydroorotate
YLR420W	R.EGAMCE#LVTPK.I	URA4	2.393	617.794	-0.23	Dihydroorotase, catalyzes the third enzymatic step in the de novo biosynthesis of pyrimidines, converting carbamoyl-L-aspartate into dihydroorotate
YML008C	R.FTGC@NVIGLNNNDYQIAK.A	ERG6	5.962	1020.99	-0.62	Delta(24)-sterol C-methyltransferase, converts zymosterol to fecosterol in the ergosterol biosynthetic pathway by methylating position C-24; localized to both lipid particles and mitochondrial outer membrane
YML022W	K.AGKLPGEC@FK.A	APT1	2.615	369.527	-0.21	Adenine phosphoribosyltransferase, catalyzes the formation of AMP from adenine and 5-phosphoribosylpyrophosphate; involved in the salvage pathway of purine nucleotide biosynthesis
YML028W	R.LVEAFQWTDKNGTVLPC@NWTPGAATIKPTVEDSK.E	TSA1	2.872	944.226	-0.31	Thioredoxin peroxidase, acts as both a ribosome-associated and free cytoplasmic antioxidant; self-associates to form a high-molecular weight chaperone complex under oxidative stress; deletion results in mutator phenotype
YML056C	K.FGFSGFPVTEDGKC@PGK.L	IMD4	2.885	610.623	0.28	Inosine monophosphate dehydrogenase, catalyzes the first step of GMP biosynthesis, member of a four-gene family in S. cerevisiae, constitutively expressed
YML056C	K.KFIPYLYNGLQHSC@QDIGC@ESLTSLK.E	IMD4	5.155	768.629	-0.61	Inosine monophosphate dehydrogenase, catalyzes the first step of GMP biosynthesis, member of a four-gene family in S. cerevisiae, constitutively expressed
YML058W	R.C]QQQQAPSTLR.T	SML1	3.477	658.822	0.01	Ribonucleotide reductase inhibitor involved in regulating dNTP production; regulated by Mec1p and Rad53p during DNA damage and S phase
YML086C	R.C@SNTTLPSEPLDTSK.R	ALO1	3.398	825.389	1	D-Arabinono-1,4-lactone oxidase, catalyzes the final step in biosynthesis of D-erythroascorbic acid, which is protective against oxidative stress
YML126C	K.YFDYNVFHVPTC@K.L	ERG13	4.553	845.388	-2.15	3-hydroxy-3-methylglutaryl-CoA (HMG-CoA) synthase, catalyzes the formation of HMG-CoA from acetyl-CoA and acetoacetyl-CoA; involved in the second step in mevalonate biosynthesis
YMR008C	K.IAVAC@SGGGYR.A	PLB1	3.168	555.772	-0.1	Phospholipase B (lysophospholipase) involved in lipid metabolism, required for deacylation of phosphatidylcholine and phosphatidylethanolamine but not phosphatidylinositol
YMR047C	R.ITC@FNC@YPVDK.S	NUP116	3.586	708.817	-1.33	Subunit of the nuclear pore complex (NPC) that is localized to both sides of the pore; contains a repetitive GLFG motif that interacts with mRNA export factor Mex67p and with karyopherin Kap95p; homologous to Nup100p
YMR062C	K.SIC@TTDTFPK.L	ECM40	2.984	585.279	-0.68	Mitochondrial ornithine acetyltransferase, catalyzes the fifth step in arginine biosynthesis; also possesses acetylglutamate synthase activity, regenerates acetylglutamate while forming ornithine
YMR079W	K.EFLESYPQNC@PPDALPGTPGNLDSAQEK.A	SEC14	3.054	1025.47	0.19	Phosphatidylinositol/phosphatidylcholine transfer protein involved in coordinate regulation of PtdIns and PtdCho metabolism, products of which are regulators in Golgi to plasma membrane transport; functionally homologous to mammalian PITPs
YMR083W	K.YSGVC@HTDLHAWHGDWPLPVK.L	ADH3	3.656	619.547	0.09	Mitochondrial alcohol dehydrogenase isozyme III; involved in the shuttling of mitochondrial NADH to the cytosol under anaerobic conditions and ethanol production
YMR091C	R.AITEQQNFEK.C	NPL6	2.697	604.301	-1.18	Component of the RSC chromatin remodeling complex; interacts with Rsc3p, Rsc30p, Ldb7p, and Htl1p to form a module important for a broad range of RSC functions; involved in nuclear protein import and maintenance of proper telomere length
YMR092C	K.GSQYLCSGD#ESGK.V	AIP1	3.079	694.293	0.14	Actin cortical patch component, interacts with the actin depolymerizing factor cofilin; required to restrict cofilin localization to cortical patches; contains WD repeats
YMR092C	R.NFTTHLSYDPTTNAIAYPCGK[.S	AIP1	3.624	791.039	0.16	Actin cortical patch component, interacts with the actin depolymerizing factor cofilin; required to restrict cofilin localization to cortical patches; contains WD repeats
YMR100W	R.C]QQEEQNEICNNHC@PVLNLFER[.Y	MUB1	2.343	944.414	-0.28	Protein of unknown function, deletion causes multi-budding phenotype; has similarity to Aspergillus nidulans samB gene
YMR120C	K.VDYVVC@NLYPFK.E	ADE17	3.459	758.878	-1.42	Enzyme of 'de novo' purine biosynthesis containing both 5-aminoimidazole-4-carboxamide ribonucleotide transformylase and inosine monophosphate cyclohydrolase activities, isozyme of Ade16p; ade16 ade17 mutants require adenine and histidine
YMR120C	K.YTQSNSVC@YAR.N	ADE17	3.433	674.801	0.01	Enzyme of 'de novo' purine biosynthesis containing both 5-aminoimidazole-4-carboxamide ribonucleotide transformylase and inosine monophosphate cyclohydrolase activities, isozyme of Ade16p; ade16 ade17 mutants require adenine and histidine
YMR146C	K.KYETDC@PLNTAVITPLK.E	TIF34	5.898	982.014	0.18	Subunit of the core complex of translation initiation factor 3(eIF3), which is essential for translation
YMR146C	K.LWDVSNGQC@VATWK.S	TIF34	4.848	832.399	0.55	Subunit of the core complex of translation initiation factor 3(eIF3), which is essential for translation
YMR189W	K.AVDVLKNPDVSGC@LVQYPATDGSILPPDSMK.Q	GCV2	5.201	1101.55	-0.65	P subunit of the mitochondrial glycine decarboxylase complex, required for the catabolism of glycine to 5,10-methylene-THF; expression is regulated by levels of 5,10-methylene-THF in the cytoplasm
YMR189W	K.TFSIPHGGGGPAGAPIC@VK.S	GCV2	3.117	911.968	0.73	P subunit of the mitochondrial glycine decarboxylase complex, required for the catabolism of glycine to 5,10-methylene-THF; expression is regulated by levels of 5,10-methylene-THF in the cytoplasm
YMR189W	K.VVPVNC@LQDGSLDLVDLK.N	GCV2	3.98	992.525	0.47	P subunit of the mitochondrial glycine decarboxylase complex, required for the catabolism of glycine to 5,10-methylene-THF; expression is regulated by levels of 5,10-methylene-THF in the cytoplasm
YMR189W	R.DLSLANSMIPLGSC@TMK.L	GCV2	4.315	935.44	-1.67	P subunit of the mitochondrial glycine decarboxylase complex, required for the catabolism of glycine to 5,10-methylene-THF; expression is regulated by levels of 5,10-methylene-THF in the cytoplasm
YMR200W	R.QLFSDPC@NDDGVSTYSR.Y	ROT1	4.76	980.92	-0.45	Essential ER membrane protein; may be involved in protein folding; mutation causes defects in cell wall synthesis and in lysis of autophagic bodies, suppresses tor2 mutations, and is synthetically lethal with kar2-1 and with rot2 mutations
[truncated: 137 more rows]

## Sheet: Overall
Table S2(D). Peptides containing cysteine identified from the triplicate experiment with the reduction/alkylation, but without the enrichment
[truncated: 1,017 more rows]
