# Supplementary material for: Evaluation and optimization of reduction and alkylation methods to maximize peptide identification with MS-based proteomics
Source: Royal Society of Chemistry journal article supplement (doi:10.1039/c7mb00393e), 2017-09-20
Supplement: c7mb00393e4.xlsx [file c7mb00393e4.xlsx]

## Sheet: Expt. 1
Table S3(A). Peptides containing cysteine identified from the first experiment with the enrichment and reduction/alkylation
Reference	Peptide	Gene symbol	XCorr	Obs m/z	PPM	Annotation
R0020C	R.C]VIETTR.G	REP1	2.331	439.723	-0.75	Master regulator that acts in concert with Rep2p to regulate transcript levels of the FLP1 gene that promotes plasmid copy amplification; autoregulates levels of its own transcript
R0040C	R.TAYSVWDVC@R.L	REP2	3.007	628.79	0.22	Master regulator that acts in concert with Rep1p to regulate transcript levels of the FLP1 gene that promotes plasmid copy amplification; also autoregulates levels of its own transcript
YAL003W	K.LQINC@VVEDDK.V	EFB1	3.207	666.827	0.2	Translation elongation factor 1 beta; stimulates nucleotide exchange to regenerate EF-1 alpha-GTP for the next elongation cycle; part of the EF-1 complex, which facilitates binding of aminoacyl-tRNA to the ribosomal A site
YAL005C	R.ARFEELC@ADLFR.S	SSA1	3.418	509.586	0.14	ATPase involved in protein folding and nuclear localization signal (NLS)-directed nuclear transport; member of heat shock protein 70 (HSP70) family; forms a chaperone complex with Ydj1p; localized to the nucleus, cytoplasm, and cell wall
YAL005C	R.FEELC@ADLFR.S	SSA1	3.52	650.306	0.38	ATPase involved in protein folding and nuclear localization signal (NLS)-directed nuclear transport; member of heat shock protein 70 (HSP70) family; forms a chaperone complex with Ydj1p; localized to the nucleus, cytoplasm, and cell wall
YAL005C	R.LRTAC@ER.A	SSA1	2.026	453.234	-0.57	ATPase involved in protein folding and nuclear localization signal (NLS)-directed nuclear transport; member of heat shock protein 70 (HSP70) family; forms a chaperone complex with Ydj1p; localized to the nucleus, cytoplasm, and cell wall
YAL007C	K.YTFC@FSNNYGTALK.K	ERP2	2.89	843.386	0.98	Protein that forms a heterotrimeric complex with Erp1p, Emp24p, and Erv25p; member, along with Emp24p and Erv25p, of the p24 family involved in ER to Golgi transport and localized to COPII-coated vesicles
YAL016W	K.KSLAEC@QELLKN.-	TPD3	2.821	716.877	0.13	Regulatory subunit A of the heterotrimeric protein phosphatase 2A, which also contains regulatory subunit Cdc55p and either catalytic subunit Pph21p or Pph22p; required for cell morphogenesis and for transcription by RNA polymerase III
YAL016W	K.NTILPSLQTLC@QDEDVDVK.Y	TPD3	4.79	1094.54	-0.37	Regulatory subunit A of the heterotrimeric protein phosphatase 2A, which also contains regulatory subunit Cdc55p and either catalytic subunit Pph21p or Pph22p; required for cell morphogenesis and for transcription by RNA polymerase III
YAL016W	K.SLAEC@QELLKN.-	TPD3	3.606	652.829	0.02	Regulatory subunit A of the heterotrimeric protein phosphatase 2A, which also contains regulatory subunit Cdc55p and either catalytic subunit Pph21p or Pph22p; required for cell morphogenesis and for transcription by RNA polymerase III
YAL016W	K.VSAC@GLFK.S	TPD3	2.202	441.231	-0.04	Regulatory subunit A of the heterotrimeric protein phosphatase 2A, which also contains regulatory subunit Cdc55p and either catalytic subunit Pph21p or Pph22p; required for cell morphogenesis and for transcription by RNA polymerase III
YAL019W	K.LC@C@NFPNTLSK.Y	FUN30	2.986	677.317	-2.17	Protein whose overexpression affects chromosome stability, potential Cdc28p substrate; homolog of Snf2p; the authentic, non-tagged protein is detected in highly purified mitochondria in high-throughput studies
YAL023C	K.NQALGGSLLHSHIQTYPDGSNQQQVTC@YGYK.D	PMT2	3.787	866.913	0.24	Protein O-mannosyltransferase, transfers mannose residues from dolichyl phosphate-D-mannose to protein serine/threonine residues; acts in a complex with Pmt1p, can instead interact with Pmt5p in some conditions; target for new antifungals
YAL023C	K.NQALGGSLLHSHIQTYPDGSNQQQVTCYGY#K.D	PMT2	4.655	1155.55	-0.57	Protein O-mannosyltransferase, transfers mannose residues from dolichyl phosphate-D-mannose to protein serine/threonine residues; acts in a complex with Pmt1p, can instead interact with Pmt5p in some conditions; target for new antifungals
YAL023C	R.QQEVVC@MK.N	PMT2	2.421	511.244	-0.18	Protein O-mannosyltransferase, transfers mannose residues from dolichyl phosphate-D-mannose to protein serine/threonine residues; acts in a complex with Pmt1p, can instead interact with Pmt5p in some conditions; target for new antifungals
YAL025C	K.APNGQNFC@RNEYNVTGLC@TR.Q	MAK16	3.496	791.028	0.63	Essential nuclear protein, constituent of 66S pre-ribosomal particles; required for maturation of 25S and 5.8S rRNAs; required for maintenance of M1 satellite double-stranded RNA of the L-A virus
YAL029C	R.AC@GVLETIR.I	MYO4	2.371	509.771	-0.15	One of two type V myosin motors (along with MYO2) involved in actin-based transport of cargos; required for mRNA transport, including ASH1 mRNA, and facilitating the growth and movement of ER tubules into the growing bud along with She3p
YAL035W	K.DLRSPIC@C@ILGHVDTGK.T	FUN12	3.45	485.998	0.28	GTPase, required for general translation initiation by promoting Met-tRNAiMet binding to ribosomes and ribosomal subunit joining; homolog of bacterial IF2
YAL035W	R.I]VLCGMNGPIVTNIR.A	FUN12	2.87	836.947	-0.77	GTPase, required for general translation initiation by promoting Met-tRNAiMet binding to ribosomes and ribosomal subunit joining; homolog of bacterial IF2
YAL035W	R.IVLC@GMNGPIVTNIR.A	FUN12	3.031	828.951	1.18	GTPase, required for general translation initiation by promoting Met-tRNAiMet binding to ribosomes and ribosomal subunit joining; homolog of bacterial IF2
YAL035W	R.SPIC@C@ILGHVDTGK.T	FUN12	3.493	519.59	-0.08	GTPase, required for general translation initiation by promoting Met-tRNAiMet binding to ribosomes and ribosomal subunit joining; homolog of bacterial IF2
YAL035W	R.VGTPIC@AVK.T	FUN12	1.936	472.765	-0.18	GTPase, required for general translation initiation by promoting Met-tRNAiMet binding to ribosomes and ribosomal subunit joining; homolog of bacterial IF2
YAL038W	K.AC@DDKIMYVDYK.N	CDC19	3.755	507.564	0.09	Pyruvate kinase, functions as a homotetramer in glycolysis to convert phosphoenolpyruvate to pyruvate, the input for aerobic (TCA cycle) or anaerobic (glucose fermentation) respiration
YAL038W	K.AC@DDKIMYVDYKNITK.V	CDC19	3.356	659.653	-0.98	Pyruvate kinase, functions as a homotetramer in glycolysis to convert phosphoenolpyruvate to pyruvate, the input for aerobic (TCA cycle) or anaerobic (glucose fermentation) respiration
YAL038W	K.SNLAGKPVIC@ATQMLESMTYNPRPTR.A	CDC19	3.286	742.618	0.26	Pyruvate kinase, functions as a homotetramer in glycolysis to convert phosphoenolpyruvate to pyruvate, the input for aerobic (TCA cycle) or anaerobic (glucose fermentation) respiration
YAL038W	K.YRPNC@PIILVTR.C	CDC19	3.052	501.282	0.51	Pyruvate kinase, functions as a homotetramer in glycolysis to convert phosphoenolpyruvate to pyruvate, the input for aerobic (TCA cycle) or anaerobic (glucose fermentation) respiration
YAL038W	K.YRPNC@PIILVTRCPR[.A	CDC19	3.292	639.01	-0.32	Pyruvate kinase, functions as a homotetramer in glycolysis to convert phosphoenolpyruvate to pyruvate, the input for aerobic (TCA cycle) or anaerobic (glucose fermentation) respiration
YAL038W	K.YRPNCPIILVTR.C	CDC19	3.461	482.275	0.05	Pyruvate kinase, functions as a homotetramer in glycolysis to convert phosphoenolpyruvate to pyruvate, the input for aerobic (TCA cycle) or anaerobic (glucose fermentation) respiration
YAL038W	R.AEVSDVGNAILDGADC@VMLSGETAK.G	CDC19	3.915	846.728	0.2	Pyruvate kinase, functions as a homotetramer in glycolysis to convert phosphoenolpyruvate to pyruvate, the input for aerobic (TCA cycle) or anaerobic (glucose fermentation) respiration
YAL038W	R.N]CTPKPTSTTETVAASAVAAVFEQK.A	CDC19	3.328	870.102	0.02	Pyruvate kinase, functions as a homotetramer in glycolysis to convert phosphoenolpyruvate to pyruvate, the input for aerobic (TCA cycle) or anaerobic (glucose fermentation) respiration
YAL042W	K.DQSQNENLAQEEKVC@C@QDC@DAVR.S	ERV46	2.829	932.725	0.03	Protein localized to COPII-coated vesicles, forms a complex with Erv41p; involved in the membrane fusion stage of transport
YAL042W	K.DQSQNENLAQEEKVC@C@QDCD#AVR.S	ERV46	4.083	932.726	0.81	Protein localized to COPII-coated vesicles, forms a complex with Erv41p; involved in the membrane fusion stage of transport
YAL042W	K.NIEQC@EREGYVSK.I	ERV46	2.402	806.376	0.38	Protein localized to COPII-coated vesicles, forms a complex with Erv41p; involved in the membrane fusion stage of transport
YAL042W	K.VC@C@QDC@DAVR.S	ERV46	2.509	641.752	-0.52	Protein localized to COPII-coated vesicles, forms a complex with Erv41p; involved in the membrane fusion stage of transport
YAL042W	R.LNSEGRPVGDATELHVGGNGDGTAPVNNDPNYC@GPC@YGAK.D	ERV46	4.086	1033.21	-0.91	Protein localized to COPII-coated vesicles, forms a complex with Erv41p; involved in the membrane fusion stage of transport
YAL042W	R.LNSEGRPVGDATELHVGGNGDGTAPVNNDPNYC@GPCY#GAK.D	ERV46	4.154	1033.21	-1.25	Protein localized to COPII-coated vesicles, forms a complex with Erv41p; involved in the membrane fusion stage of transport
YAL048C	R.VVICGD#EGVGK.S	GEM1	2.035	566.787	-0.33	Evolutionarily-conserved tail-anchored outer mitochondrial membrane GTPase which regulates mitochondrial morphology; cells lacking Gem1p contain collapsed, globular, or grape-like mitochondria; not required for pheromone-induced cell death
YAL049C	K.C]C@FEGVC@HDGTPK.G	YAL049C	3.497	522.876	-0.41	Cytoplasmic protein of unknown function, potential Hsp82p interactor; null mutant displays decreased frequency of mitochondrial genome loss (petite formation)
YAL049C	K.C]C@FEGVCHD#GTPK.G	YAL049C	3.613	783.81	-0.18	Cytoplasmic protein of unknown function, potential Hsp82p interactor; null mutant displays decreased frequency of mitochondrial genome loss (petite formation)
YAL056W	R.I]C@VCIGGM@VQEDVDQFYSENDDEPPRKR.K	GPB2	2.862	568.088	0.26	Multistep regulator of cAMP-PKA signaling; inhibits PKA downstream of Gpa2p and Cyr1p, thereby increasing cAMP dependency; inhibits Ras activity through direct interactions with Ira1p/2p; regulated by G-alpha protein Gpa2p; homolog of Gpb1p
YAL060W	K.FYNSKPC@DACQR[.G	BDH1	2.065	773.332	-0.31	NAD-dependent (R,R)-butanediol dehydrogenase, catalyzes oxidation of (R,R)-2,3-butanediol to (3R)-acetoin, oxidation of meso-butanediol to (3S)-acetoin, and reduction of acetoin; enhances use of 2,3-butanediol as an aerobic carbon source
YAL060W	R.AIHNGDIAMEDC@K.Q	BDH1	3.92	497.219	-0.03	NAD-dependent (R,R)-butanediol dehydrogenase, catalyzes oxidation of (R,R)-2,3-butanediol to (3R)-acetoin, oxidation of meso-butanediol to (3S)-acetoin, and reduction of acetoin; enhances use of 2,3-butanediol as an aerobic carbon source
YAL060W	R.AIHNGDIAMEDCK[.Q	BDH1	3.199	491.887	-0.04	NAD-dependent (R,R)-butanediol dehydrogenase, catalyzes oxidation of (R,R)-2,3-butanediol to (3R)-acetoin, oxidation of meso-butanediol to (3S)-acetoin, and reduction of acetoin; enhances use of 2,3-butanediol as an aerobic carbon source
YAL062W	K.GGLC@VDLK.G	GDH3	2.721	431.228	-0.19	NADP(+)-dependent glutamate dehydrogenase, synthesizes glutamate from ammonia and alpha-ketoglutarate; rate of alpha-ketoglutarate utilization differs from Gdh1p; expression regulated by nitrogen and carbon sources
YAL062W	R.IC@YAFMR.E	GDH3	2.001	488.723	-0.13	NADP(+)-dependent glutamate dehydrogenase, synthesizes glutamate from ammonia and alpha-ketoglutarate; rate of alpha-ketoglutarate utilization differs from Gdh1p; expression regulated by nitrogen and carbon sources
YAR002C-A	K.I]CIQPEAGGWLIK.A	ERP1	3.321	742.9	0.2	Protein that forms a heterotrimeric complex with Erp2p, Emp24p, and Erv25p; member, along with Emp24p and Erv25p, of the p24 family involved in ER to Golgi transport and localized to COPII-coated vesicles
YAR007C	K.VDNFAYPAC@SNENC@NKK.V	RFA1	3.052	677.627	-0.89	Subunit of heterotrimeric Replication Protein A (RPA), which is a highly conserved single-stranded DNA binding protein involved in DNA replication, repair, and recombination
YAR009C	K.NGITPCY#TTTADSR.A	YAR009C	2.545	778.854	-0.08	Retrotransposon TYA Gag and TYB Pol genes; in YARCTY1-1 TYB is mutant and probably non-functional
YAR010C	K.EVHTNQDPLDVSASKTEEC@EK.A	YAR010C	3.41	806.036	-0.39	Retrotransposon TYA Gag gene co-transcribed with TYB Pol; in YARCTY1-1 TYB is mutant and probably non-functional
YAR010C	K.VAC@QLIMR.G	YAR010C	2.914	503.763	0.79	Retrotransposon TYA Gag gene co-transcribed with TYB Pol; in YARCTY1-1 TYB is mutant and probably non-functional
YAR071W	R.DLPE#SCEMK.Q	PHO11	2.347	554.736	0.03	One of three repressible acid phosphatases, a glycoprotein that is transported to the cell surface by the secretory pathway; induced by phosphate starvation and coordinately regulated by PHO4 and PHO2
YAR071W	R.DLPESCEMK#.Q	PHO11	1.582	562.734	0.19	One of three repressible acid phosphatases, a glycoprotein that is transported to the cell surface by the secretory pathway; induced by phosphate starvation and coordinately regulated by PHO4 and PHO2
YAR071W	R.GYSDIC@NIFTK.D	PHO11	3.855	659.31	-0.7	One of three repressible acid phosphatases, a glycoprotein that is transported to the cell surface by the secretory pathway; induced by phosphate starvation and coordinately regulated by PHO4 and PHO2
YBL005W-A	K.VAC@QFIMR.G	YBL005W-A	1.891	512.757	0.2	Retrotransposon TYA Gag gene co-transcribed with TYB Pol; translated as TYA or TYA-TYB polyprotein; Gag is a nucleocapsid protein that is the structural constituent of virus-like particles (VLPs); similar to retroviral Gag
YBL007C	K.VDAEFIGC@AK.G	SLA1	2.495	555.269	0.59	Cytoskeletal protein binding protein required for assembly of the cortical actin cytoskeleton; interacts with proteins regulating actin dynamics and proteins required for endocytosis; found in the nucleus and cell cortex; has 3 SH3 domains
YBL015W	K.VDDKCGVD#SIPVDPEK.V	ACH1	2.61	591.617	-0.17	Acetyl-coA hydrolase, primarily localized to mitochondria; phosphorylated; required for acetate utilization and for diploid pseudohyphal growth
YBL017C	K.EC@STFFTTDGGETWAEVK.K	PEP1	2.221	1032.95	0.47	Type I transmembrane sorting receptor for multiple vacuolar hydrolases; cycles between the late-Golgi and prevacuolar endosome-like compartments
YBL017C	K.GLSPANAADVC@K.K	PEP1	3.376	601.795	0.15	Type I transmembrane sorting receptor for multiple vacuolar hydrolases; cycles between the late-Golgi and prevacuolar endosome-like compartments
YBL017C	K.SSLERNENSPISISD#CGFAK.T	PEP1	4.075	737.683	-0.17	Type I transmembrane sorting receptor for multiple vacuolar hydrolases; cycles between the late-Golgi and prevacuolar endosome-like compartments
YBL017C	K.SVDISC@EGVPK.K	PEP1	3.028	595.79	0.32	Type I transmembrane sorting receptor for multiple vacuolar hydrolases; cycles between the late-Golgi and prevacuolar endosome-like compartments
YBL017C	K.YPSNEDMVMC@QVK.E	PEP1	1.593	816.839	-0.2	Type I transmembrane sorting receptor for multiple vacuolar hydrolases; cycles between the late-Golgi and prevacuolar endosome-like compartments
YBL017C	R.EC@YIETHPLNK.N	PEP1	3.134	702.335	-0.29	Type I transmembrane sorting receptor for multiple vacuolar hydrolases; cycles between the late-Golgi and prevacuolar endosome-like compartments
YBL017C	R.NENSPISISDC@GFAK.T	PEP1	3.321	819.875	0.17	Type I transmembrane sorting receptor for multiple vacuolar hydrolases; cycles between the late-Golgi and prevacuolar endosome-like compartments
YBL017C	R.Q]CDFDITGK.E	PEP1	2.641	542.242	-0.18	Type I transmembrane sorting receptor for multiple vacuolar hydrolases; cycles between the late-Golgi and prevacuolar endosome-like compartments
YBL017C	R.QDFEC@DYNFYK.A	PEP1	3.283	764.806	0.2	Type I transmembrane sorting receptor for multiple vacuolar hydrolases; cycles between the late-Golgi and prevacuolar endosome-like compartments
YBL018C	K.VMEEEEQDC@K.C	POP8	2.08	648.758	0.29	Subunit of both RNase MRP, which cleaves pre-rRNA, and nuclear RNase P, which cleaves tRNA precursors to generate mature 5' ends
YBL018C	K.VMEEEEQDC@KC@I.-	POP8	2.714	793.312	-0.72	Subunit of both RNase MRP, which cleaves pre-rRNA, and nuclear RNase P, which cleaves tRNA precursors to generate mature 5' ends
YBL022C	K.ASIHLHC@PEGATPK.D	PIM1	4.13	506.59	1.09	ATP-dependent Lon protease, involved in degradation of misfolded proteins in mitochondria; required for biogenesis and maintenance of mitochondria
YBL022C	K.IIC@FVGPPGVGK.T	PIM1	3.459	622.347	-0.09	ATP-dependent Lon protease, involved in degradation of misfolded proteins in mitochondria; required for biogenesis and maintenance of mitochondria
YBL023C	R.C@SIIAAANPNGGR.Y	MCM2	3.425	650.824	-1.2	Protein involved in DNA replication; component of the Mcm2-7 hexameric complex that binds chromatin as a part of the pre-replicative complex
YBL024W	K.FNLQNCMR[.V	NCL1	2.62	549.745	0.62	S-adenosyl-L-methionine-dependent tRNA: m5C-methyltransferase, methylates cytosine to m5C at several positions in tRNAs and intron-containing pre-tRNAs; similar to Nop2p and human proliferation associated nucleolar protein p120
YBL024W	K.TC@QAPLPLTFR.I	NCL1	2.616	652.345	-0.19	S-adenosyl-L-methionine-dependent tRNA: m5C-methyltransferase, methylates cytosine to m5C at several positions in tRNAs and intron-containing pre-tRNAs; similar to Nop2p and human proliferation associated nucleolar protein p120
YBL024W	R.ILC@DVPC@SGDGTMR.K	NCL1	2.865	790.847	-0.07	S-adenosyl-L-methionine-dependent tRNA: m5C-methyltransferase, methylates cytosine to m5C at several positions in tRNAs and intron-containing pre-tRNAs; similar to Nop2p and human proliferation associated nucleolar protein p120
YBL024W	R.ILC@DVPCSGDGTMR[.K	NCL1	2.454	798.845	0.24	S-adenosyl-L-methionine-dependent tRNA: m5C-methyltransferase, methylates cytosine to m5C at several positions in tRNAs and intron-containing pre-tRNAs; similar to Nop2p and human proliferation associated nucleolar protein p120
YBL024W	R.ILC@DVPCSGDGTMRK#.N	NCL1	2.171	575.597	0.56	S-adenosyl-L-methionine-dependent tRNA: m5C-methyltransferase, methylates cytosine to m5C at several positions in tRNAs and intron-containing pre-tRNAs; similar to Nop2p and human proliferation associated nucleolar protein p120
YBL024W	R.SDIEC@SWR.I	NCL1	2.541	526.727	0.36	S-adenosyl-L-methionine-dependent tRNA: m5C-methyltransferase, methylates cytosine to m5C at several positions in tRNAs and intron-containing pre-tRNAs; similar to Nop2p and human proliferation associated nucleolar protein p120
YBL024W	R.VVYTVC@PALK.D	NCL1	3.212	575.32	-0.15	S-adenosyl-L-methionine-dependent tRNA: m5C-methyltransferase, methylates cytosine to m5C at several positions in tRNAs and intron-containing pre-tRNAs; similar to Nop2p and human proliferation associated nucleolar protein p120
YBL026W	K.LDNISC@TDEK.K	LSM2	2.747	597.769	-0.23	Lsm (Like Sm) protein; part of heteroheptameric complexes (Lsm2p-7p and either Lsm1p or 8p): cytoplasmic Lsm1p complex involved in mRNA decay; nuclear Lsm8p complex part of U6 snRNP and possibly involved in processing tRNA, snoRNA, and rRNA
YBL030C	K.G]CGANILR.G	PET9	2.435	430.724	0.04	Major ADP/ATP carrier of the mitochondrial inner membrane, exchanges cytosolic ADP for mitochondrially synthesized ATP; phosphorylated; required for viability in many common lab strains carrying a mutation in the polymorphic SAL1 gene
YBL030C	K.YAGILDC@FK.R	PET9	2.709	543.768	0.2	Major ADP/ATP carrier of the mitochondrial inner membrane, exchanges cytosolic ADP for mitochondrially synthesized ATP; phosphorylated; required for viability in many common lab strains carrying a mutation in the polymorphic SAL1 gene
YBL030C	K.YDGAFDC@LR.K	PET9	2.974	558.743	0.11	Major ADP/ATP carrier of the mitochondrial inner membrane, exchanges cytosolic ADP for mitochondrially synthesized ATP; phosphorylated; required for viability in many common lab strains carrying a mutation in the polymorphic SAL1 gene
YBL030C	K.YDGAFDC@LRK.I	PET9	2.131	415.529	-0.22	Major ADP/ATP carrier of the mitochondrial inner membrane, exchanges cytosolic ADP for mitochondrially synthesized ATP; phosphorylated; required for viability in many common lab strains carrying a mutation in the polymorphic SAL1 gene
YBL030C	R.MMMTSGQAVKYDGAFDCLR[.K	PET9	2.779	732.989	-0.4	Major ADP/ATP carrier of the mitochondrial inner membrane, exchanges cytosolic ADP for mitochondrially synthesized ATP; phosphorylated; required for viability in many common lab strains carrying a mutation in the polymorphic SAL1 gene
YBL032W	K.IGISE#KVPGCSDR.I	HEK2	2.25	473.242	-0.2	RNA binding protein with similarity to hnRNP-K that localizes to the cytoplasm and to subtelomeric DNA; required for the proper localization of ASH1 mRNA; involved in the regulation of telomere position effect and telomere length
YBL033C	R.IHSEC@YTGENAWSAR.C	RIB1	3.666	594.261	-0.46	GTP cyclohydrolase II; catalyzes the first step of the riboflavin biosynthesis pathway
YBL036C	R.AKFQPDC@NPILC@NVQINTSHEDQK.S	YBL036C	2.285	714.84	-0.4	Single-domain racemase, possibly non-specific due to the lack of the second domain, which presumably determines specificity; GFP-fusion protein expression is induced in response to the DNA-damaging agent MMS
YBL039C	R.C@EILELK.N	URA7	3.164	452.744	-0.24	Major CTP synthase isozyme (see also URA8), catalyzes the ATP-dependent transfer of the amide nitrogen from glutamine to UTP, forming CTP, the final step in de novo biosynthesis of pyrimidines; involved in phospholipid biosynthesis
YBL039C	R.C]SETLDKPTIDK.I	URA7	2.449	469.566	-0.07	Major CTP synthase isozyme (see also URA8), catalyzes the ATP-dependent transfer of the amide nitrogen from glutamine to UTP, forming CTP, the final step in de novo biosynthesis of pyrimidines; involved in phospholipid biosynthesis
YBL041W	K.VFDC@GDNIVMSANGFAADGDALVKR.F	PRE7	3.144	886.748	0.09	Beta 6 subunit of the 20S proteasome
YBL050W	K.GLC@QLAATDAVAAAR.T	SEC17	3.886	496.593	0.38	Peripheral membrane protein required for vesicular transport between ER and Golgi and for the 'priming' step in homotypic vacuole fusion, part of the cis-SNARE complex; has similarity to alpha-SNAP
YBL050W	K.SLIDAVNEGDSEQLSEHC@K.E	SEC17	3.579	1065.99	1.96	Peripheral membrane protein required for vesicular transport between ER and Golgi and for the 'priming' step in homotypic vacuole fusion, part of the cis-SNARE complex; has similarity to alpha-SNAP
YBL057C	K.IAAQC@C@HAALSC@FR.H	PTH2	2.125	555.587	-0.17	One of two (see also PTH1) mitochondrially-localized peptidyl-tRNA hydrolases; negatively regulates the ubiquitin-proteasome pathway via interactions with ubiquitin-like ubiquitin-associated proteins; dispensable for cell growth
YBL058W	K.AINTEHVGGLC@PKPGSSQGSNEYLK.R	SHP1	3.062	661.576	0.2	UBX (ubiquitin regulatory X) domain-containing protein that regulates Glc7p phosphatase activity and interacts with Cdc48p; interacts with ubiquitylated proteins in vivo and is required for degradation of a ubiquitylated model substrate
YBL058W	R.EVLHC@NSTDTVK.F	SHP1	2.835	701.835	-0.15	UBX (ubiquitin regulatory X) domain-containing protein that regulates Glc7p phosphatase activity and interacts with Cdc48p; interacts with ubiquitylated proteins in vivo and is required for degradation of a ubiquitylated model substrate
YBL059C-A	K.RIFGLC@NNEK.D	YBL059C-A	2.942	625.819	0.02	Putative protein of unknown function; contains twin Cx9C motifs that can form coiled coil-helix-coiled-coil helix fold; green fluorescent protein (GFP)-fusion protein localizes to the cytoplasm and nucleus
YBL068W	K.A]CDTLMEHGAK.E	PRS4	2.621	616.774	0.75	5-phospho-ribosyl-1(alpha)-pyrophosphate synthetase, synthesizes PRPP, which is required for nucleotide, histidine, and tryptophan biosynthesis; one of five related enzymes, which are active as heteromultimeric complexes
YBL068W	K.SC@LLVDDMADTC@GTLVK.A	PRS4	4.392	957.434	-2.66	5-phospho-ribosyl-1(alpha)-pyrophosphate synthetase, synthesizes PRPP, which is required for nucleotide, histidine, and tryptophan biosynthesis; one of five related enzymes, which are active as heteromultimeric complexes
YBL072C	R.LY#ACISSRPGQSGR.C	RPS8A	1.946	776.388	-0.3	Protein component of the small (40S) ribosomal subunit; identical to Rps8Bp and has similarity to rat S8 ribosomal protein
YBL076C	K.LGITGKDDVFKYGLENYNNEC@R.S	ILS1	4.657	869.083	-0.43	Cytoplasmic isoleucine-tRNA synthetase, target of the G1-specific inhibitor reveromycin A
YBL076C	K.YGLENYNNEC@R.S	ILS1	3.708	716.301	-0.19	Cytoplasmic isoleucine-tRNA synthetase, target of the G1-specific inhibitor reveromycin A
YBL076C	R.HSYPFC@WR.S	ILS1	2.082	576.756	0.2	Cytoplasmic isoleucine-tRNA synthetase, target of the G1-specific inhibitor reveromycin A
YBL076C	R.VISDDYVTSDSGTGIVHNAPAFGEEDNAAC@LK.N	ILS1	3.804	1118.18	-0.32	Cytoplasmic isoleucine-tRNA synthetase, target of the G1-specific inhibitor reveromycin A
YBL076C	R.VISDDYVTSDSGTGIVHNAPAFGEEDNAACLK#.N	ILS1	3.858	1118.18	-0.34	Cytoplasmic isoleucine-tRNA synthetase, target of the G1-specific inhibitor reveromycin A
YBL076C	R.VISDDYVTSDSGTGIVHNAPAFGEEDNAACLK.N	ILS1	4.134	1099.18	1.77	Cytoplasmic isoleucine-tRNA synthetase, target of the G1-specific inhibitor reveromycin A
YBL085W	K.ESMQTADC@SGWMSK.K	BOI1	1.889	817.318	-0.52	Protein implicated in polar growth, functionally redundant with Boi2p; interacts with bud-emergence protein Bem1p; contains an SH3 (src homology 3) domain and a PH (pleckstrin homology) domain
YBL085W	K.ESMQTADCSGWMSK#.K	BOI1	2.488	817.318	-0.28	Protein implicated in polar growth, functionally redundant with Boi2p; interacts with bud-emergence protein Bem1p; contains an SH3 (src homology 3) domain and a PH (pleckstrin homology) domain
YBL086C	K.ELVNIPQSSGY#CYTK.W	YBL086C	2.795	879.922	0.5	Protein of unknown function; green fluorescent protein (GFP)-fusion protein localizes to the cell periphery
YBL086C	R.EC@VEDILQGGNGWAK.N	YBL086C	3.908	838.391	0.75	Protein of unknown function; green fluorescent protein (GFP)-fusion protein localizes to the cell periphery
YBL087C	K.E]CADLWPR.V	RPL23A	2.341	523.74	0.17	Protein component of the large (60S) ribosomal subunit, identical to Rpl23Bp and has similarity to E. coli L14 and rat L23 ribosomal proteins
YBL087C	K.EC@ADLWPR.V	RPL23A	2.219	523.74	0.18	Protein component of the large (60S) ribosomal subunit, identical to Rpl23Bp and has similarity to E. coli L14 and rat L23 ribosomal proteins
YBL087C	R.ISLGLPVGAIMNC@ADNSGAR.N	RPL23A	4.099	1016.5	-0.31	Protein component of the large (60S) ribosomal subunit, identical to Rpl23Bp and has similarity to E. coli L14 and rat L23 ribosomal proteins
YBL091C	R.NFGTLPFC@R.R	MAP2	2.515	556.271	0.03	Methionine aminopeptidase, catalyzes the cotranslational removal of N-terminal methionine from nascent polypeptides; function is partially redundant with that of Map1p
YBL104C	R.QIYIQC@QNC@K.Q	YBL104C	2.867	677.816	-0.16	Putative protein of unknown function, promoter contains multiple GCN4 binding sites
YBL105C	K.Y]DCPSLAQRIQYMLQQLE#FK.L	PKC1	2.083	863.428	1.78	Protein serine/threonine kinase essential for cell wall remodeling during growth; localized to sites of polarized growth and the mother-daughter bud neck; homolog of the alpha, beta, and gamma isoforms of mammalian protein kinase C (PKC)
YBL105C	R.YTGFQCQD#CK#.F	PKC1	2.01	653.763	-0.33	Protein serine/threonine kinase essential for cell wall remodeling during growth; localized to sites of polarized growth and the mother-daughter bud neck; homolog of the alpha, beta, and gamma isoforms of mammalian protein kinase C (PKC)
YBL107C	R.NNIISFC@EK.E	YBL107C	2.146	562.774	-0.57	Putative protein of unknown function; green fluorescent protein (GFP)-fusion protein localizes to the cytoplasm; YBL107C is not an essential gene
YBR006W	K.TTHGC@VINSSAIEK.V	UGA2	2.061	758.874	-0.48	Succinate semialdehyde dehydrogenase involved in the utilization of gamma-aminobutyrate (GABA) as a nitrogen source; part of the 4-aminobutyrate and glutamate degradation pathways; localized to the cytoplasm
YBR011C	R.NC@FPHHGYIHNYGAFPQTWEDPNVSHPETK.A	IPP1	3.18	716.724	-0.14	Cytoplasmic inorganic pyrophosphatase (PPase), catalyzes the rapid exchange of oxygens from Pi with water, highly expressed and essential for viability, active-site residues show identity to those from E. coli PPase
YBR015C	K.C@IYVSDILPR.E	MNN2	2.585	618.327	0.68	Alpha-1,2-mannosyltransferase, responsible for addition of the first alpha-1,2-linked mannose to form the branches on the mannan backbone of oligosaccharides, localizes to an early Golgi compartment
YBR015C	K.VLNEYVC@VNK.N	MNN2	3.524	619.316	-0.33	Alpha-1,2-mannosyltransferase, responsible for addition of the first alpha-1,2-linked mannose to form the branches on the mannan backbone of oligosaccharides, localizes to an early Golgi compartment
YBR025C	K.C]EDVFEYKDDSAIK.A	OLA1	3.012	573.591	-0.32	P-loop ATPase with similarity to human OLA1 and bacterial YchF; identified as specifically interacting with the proteasome; protein levels are induced by hydrogen peroxide
YBR025C	R.C@PLGNPANYPFATIDPEEAR.V	OLA1	4.759	744.685	0.12	P-loop ATPase with similarity to human OLA1 and bacterial YchF; identified as specifically interacting with the proteasome; protein levels are induced by hydrogen peroxide
YBR025C	R.FDKLC@EIYKK.T	OLA1	2.787	448.572	-0.28	P-loop ATPase with similarity to human OLA1 and bacterial YchF; identified as specifically interacting with the proteasome; protein levels are induced by hydrogen peroxide
YBR026C	K.SLIYSTHEVEDC@TK.V	ETR1	2.129	841.39	-0.37	2-enoyl thioester reductase, member of the medium chain dehydrogenase/reductase family; localized to in mitochondria, where it has a probable role in fatty acid synthesis
YBR031W	R.SGQGAFGNMC@R.G	RPL4A	2.367	600.748	-0.43	N-terminally acetylated protein component of the large (60S) ribosomal subunit, nearly identical to Rpl4Bp and has similarity to E. coli L4 and rat L4 ribosomal proteins
YBR031W	R.SGQGAFGNMCR.G	RPL4A	2.4	572.237	-0.72	N-terminally acetylated protein component of the large (60S) ribosomal subunit, nearly identical to Rpl4Bp and has similarity to E. coli L4 and rat L4 ribosomal proteins
YBR035C	R.FKDAEDIPC@PDYWGGLR.I	PDX3	2.947	1019.97	-1.06	Pyridoxine (pyridoxamine) phosphate oxidase, has homologs in E. coli and Myxococcus xanthus; transcription is under the general control of nitrogen metabolism
YBR041W	K.G]FCEVAPVGEPGEMLMR.I	FAT1	3.065	955.926	0.25	Fatty acid transporter and very long-chain fatty acyl-CoA synthetase, may form a complex with Faa1p or Faa4p that imports and activates exogenous fatty acids
YBR046C	K.C]TIPEQQK.V	ZTA1	2.471	502.248	0.03	Zeta-crystallin homolog, found in the cytoplasm and nucleus; has similarity to E. coli quinone oxidoreductase and to human zeta-crystallin, which has quinone oxidoreductase activity
YBR048W	K.C]PFTGLVSIR.G	RPS11B	3.348	575.308	0.16	Protein component of the small (40S) ribosomal subunit; identical to Rps11Ap and has similarity to E. coli S17 and rat S11 ribosomal proteins
YBR048W	K.KC@PFTGLVSIR.G	RPS11B	2.151	426.573	-0.17	Protein component of the small (40S) ribosomal subunit; identical to Rps11Ap and has similarity to E. coli S17 and rat S11 ribosomal proteins
YBR052C	K.ELTDVEDVNGSC@AWGAGC@VSGIDGGRPPSLSELR.V	RFS1	3.661	1187.55	0.77	Protein of unknown function; member of a flavodoxin-like fold protein family that includes Pst2p and Ycp4p; green fluorescent protein (GFP)-fusion protein localizes to the cytoplasm in a punctate pattern
YBR053C	R.VSC@C@C@FVGK.D	YBR053C	2.759	558.735	0.06	Putative protein of unknown function; induced by cell wall perturbation
YBR078W	K.KLQSNGAIQGDSFVC@K.N	ECM33	3.372	584.63	0.17	GPI-anchored protein of unknown function, has a possible role in apical bud growth; GPI-anchoring on the plasma membrane crucial to function; phosphorylated in mitochondria; similar to Sps2p and Pst1p
YBR078W	K.KLQSNGAIQGDSFVCK#.N	ECM33	3.821	584.63	0.09	GPI-anchored protein of unknown function, has a possible role in apical bud growth; GPI-anchoring on the plasma membrane crucial to function; phosphorylated in mitochondria; similar to Sps2p and Pst1p
YBR078W	K.LQSNGAIQGD#SFVCK.N	ECM33	2.074	812.393	-0.37	GPI-anchored protein of unknown function, has a possible role in apical bud growth; GPI-anchoring on the plasma membrane crucial to function; phosphorylated in mitochondria; similar to Sps2p and Pst1p
YBR078W	K.LQSNGAIQGDSFVC@K.N	ECM33	4.513	812.393	-1.05	GPI-anchored protein of unknown function, has a possible role in apical bud growth; GPI-anchoring on the plasma membrane crucial to function; phosphorylated in mitochondria; similar to Sps2p and Pst1p
YBR084W	K.DSNVDC@IIEK.L	MIS1	3.271	596.78	1.48	Mitochondrial C1-tetrahydrofolate synthase, involved in interconversion between different oxidation states of tetrahydrofolate (THF); provides activities of formyl-THF synthetase, methenyl-THF cyclohydrolase, and methylene-THF dehydrogenase
YBR084W	K.KGGKPYFIPC@TPYGC@MK.L	MIS1	2.955	673.987	-0.71	Mitochondrial C1-tetrahydrofolate synthase, involved in interconversion between different oxidation states of tetrahydrofolate (THF); provides activities of formyl-THF synthetase, methenyl-THF cyclohydrolase, and methylene-THF dehydrogenase
YBR084W	K.QGFGNLPIC@IAK.T	MIS1	2.926	659.353	0.05	Mitochondrial C1-tetrahydrofolate synthase, involved in interconversion between different oxidation states of tetrahydrofolate (THF); provides activities of formyl-THF synthetase, methenyl-THF cyclohydrolase, and methylene-THF dehydrogenase
YBR087W	K.C]VIINEANSLTK.D	RFC5	2.526	681.359	0.48	Subunit of heteropentameric Replication factor C (RF-C), which is a DNA binding protein and ATPase that acts as a clamp loader of the proliferating cell nuclear antigen (PCNA) processivity factor for DNA polymerases delta and epsilon
YBR092C	R.DLPEGC@EMK.Q	PHO3	1.705	547.728	-0.26	Constitutively expressed acid phosphatase similar to Pho5p; brought to the cell surface by transport vesicles; hydrolyzes thiamin phosphates in the periplasmic space, increasing cellular thiamin uptake; expression is repressed by thiamin
YBR092C	R.GYSDVC@DIFTEDELVR.Y	PHO3	4.533	959.43	0.04	Constitutively expressed acid phosphatase similar to Pho5p; brought to the cell surface by transport vesicles; hydrolyzes thiamin phosphates in the periplasmic space, increasing cellular thiamin uptake; expression is repressed by thiamin
YBR093C	K.GYSDVC@DIFTK.D	PHO5	2.896	652.795	0.19	Repressible acid phosphatase (1 of 3) that also mediates extracellular nucleotide-derived phosphate hydrolysis; secretory pathway derived cell surface glycoprotein; induced by phosphate starvation and coordinately regulated by PHO4 and PHO2
YBR096W	K.DALEYC@GLYNEK.V	YBR096W	3.734	737.829	-0.16	Putative protein of unknown function; green fluorescent protein (GFP)-fusion protein localizes to the ER
YBR096W	K.LLTE#RCGFHETVPLENLSQEYC@SEI.-	YBR096W	4.043	1008.81	0.73	Putative protein of unknown function; green fluorescent protein (GFP)-fusion protein localizes to the ER
YBR096W	R.CGFH#ETVPLENLSQEYCSEI[.-	YBR096W	3.468	1206.53	-0.75	Putative protein of unknown function; green fluorescent protein (GFP)-fusion protein localizes to the ER
YBR115C	K.IQSC@QDLER.T	LYS2	2.64	574.772	-0.25	Alpha aminoadipate reductase, catalyzes the reduction of alpha-aminoadipate to alpha-aminoadipate 6-semialdehyde, which is the fifth step in biosynthesis of lysine; activation requires posttranslational phosphopantetheinylation by Lys5p
YBR115C	K.YGCTVTH#LTPAMGQLLTAQATTPFPK.L	LYS2	4.448	940.808	0.79	Alpha aminoadipate reductase, catalyzes the reduction of alpha-aminoadipate to alpha-aminoadipate 6-semialdehyde, which is the fifth step in biosynthesis of lysine; activation requires posttranslational phosphopantetheinylation by Lys5p
YBR115C	R.GC@IVRPGYVTGASANGSSNTDDFLLR.F	LYS2	6.343	909.777	0.78	Alpha aminoadipate reductase, catalyzes the reduction of alpha-aminoadipate to alpha-aminoadipate 6-semialdehyde, which is the fifth step in biosynthesis of lysine; activation requires posttranslational phosphopantetheinylation by Lys5p
YBR115C	R.LQTLAENC@R.I	LYS2	3.134	552.777	0.2	Alpha aminoadipate reductase, catalyzes the reduction of alpha-aminoadipate to alpha-aminoadipate 6-semialdehyde, which is the fifth step in biosynthesis of lysine; activation requires posttranslational phosphopantetheinylation by Lys5p
YBR115C	R.TC@VVETPTLNSDK.S	LYS2	3.221	732.356	-0.53	Alpha aminoadipate reductase, catalyzes the reduction of alpha-aminoadipate to alpha-aminoadipate 6-semialdehyde, which is the fifth step in biosynthesis of lysine; activation requires posttranslational phosphopantetheinylation by Lys5p
YBR118W	K.FVPSK#PMC@VEAFSEYPPLGR.F	TEF2	3.202	790.054	-0.11	Translational elongation factor EF-1 alpha; also encoded by TEF1; functions in the binding reaction of aminoacyl-tRNA (AA-tRNA) to ribosomes
YBR118W	K.FVPSK#PMCVE#AFSEYPPLGR.F	TEF2	2.853	790.052	-1.48	Translational elongation factor EF-1 alpha; also encoded by TEF1; functions in the binding reaction of aminoacyl-tRNA (AA-tRNA) to ribosomes
YBR118W	K.FVPSK#PMCVEAFSEYPPLGR.F	TEF2	2.685	776.378	-0.24	Translational elongation factor EF-1 alpha; also encoded by TEF1; functions in the binding reaction of aminoacyl-tRNA (AA-tRNA) to ribosomes
YBR118W	K.FVPSKPMC@VEAFSEYPPLGR.F	TEF2	2.594	776.379	0.59	Translational elongation factor EF-1 alpha; also encoded by TEF1; functions in the binding reaction of aminoacyl-tRNA (AA-tRNA) to ribosomes
YBR118W	K.FVPSKPMCVEAFSEYPPLGR.F	TEF2	3.551	757.371	-0.1	Translational elongation factor EF-1 alpha; also encoded by TEF1; functions in the binding reaction of aminoacyl-tRNA (AA-tRNA) to ribosomes
YBR121C	K.FSDWMC@R.D	GRS1	2.376	509.2	0.21	Cytoplasmic and mitochondrial glycyl-tRNA synthase that ligates glycine to the cognate anticodon bearing tRNA; transcription termination factor that may interact with the 3'-end of pre-mRNA to promote 3'-end formation
YBR121C	K.TSGHVDKFSDWMC@R.D	GRS1	3.812	581.252	-0.66	Cytoplasmic and mitochondrial glycyl-tRNA synthase that ligates glycine to the cognate anticodon bearing tRNA; transcription termination factor that may interact with the 3'-end of pre-mRNA to promote 3'-end formation
YBR121C	K.TSGHVDKFSDWMCR[.D	GRS1	3.912	575.921	0.75	Cytoplasmic and mitochondrial glycyl-tRNA synthase that ligates glycine to the cognate anticodon bearing tRNA; transcription termination factor that may interact with the 3'-end of pre-mRNA to promote 3'-end formation
YBR121C	K.TSYGWIE#CVGC@ADR.S	GRS1	3.747	837.355	-0.57	Cytoplasmic and mitochondrial glycyl-tRNA synthase that ligates glycine to the cognate anticodon bearing tRNA; transcription termination factor that may interact with the 3'-end of pre-mRNA to promote 3'-end formation
YBR126C	R.DGMNLVSYEYIAC@QEEK.K	TPS1	3.123	1032.95	1.36	Synthase subunit of trehalose-6-phosphate synthase/phosphatase complex, which synthesizes the storage carbohydrate trehalose; also found in a monomeric form; expression is induced by the stress response and repressed by the Ras-cAMP pathway
YBR127C	K.IPIFSASGLPH#NEIAAQICR.Q	VMA2	2.325	732.053	0.59	Subunit B of the eight-subunit V1 peripheral membrane domain of the vacuolar H+-ATPase (V-ATPase), an electrogenic proton pump found throughout the endomembrane system; contains nucleotide binding sites; also detected in the cytoplasm
YBR127C	R.GQKIPIFSASGLPHNEIAAQIC@R.Q	VMA2	3.051	836.444	-0.65	Subunit B of the eight-subunit V1 peripheral membrane domain of the vacuolar H+-ATPase (V-ATPase), an electrogenic proton pump found throughout the endomembrane system; contains nucleotide binding sites; also detected in the cytoplasm
YBR129C	R.NAEHQVC@SGILYTK.V	OPY1	2.606	540.6	0.3	Protein of unknown function, overproduction blocks cell cycle arrest in the presence of mating pheromone; the authentic, non-tagged protein is detected in highly purified mitochondria in high-throughput studies
YBR130C	K.NSSAIEQSC@SEK.L	SHE3	3.027	670.293	-0.28	Protein that acts as an adaptor between Myo4p and the She2p-mRNA complex; part of the mRNA localization machinery that restricts accumulation of certain proteins to the bud; also required for cortical ER inheritance
YBR139W	K.GGYHPVLSSEEC@EK.M	YBR139W	4.531	531.24	0.32	Putative serine type carboxypeptidase with a role in phytochelatin synthesis; green fluorescent protein (GFP)-fusion protein localizes to the vacuole; expression induced by nitrogen limitation in a GLN3, GAT1-independent manner
YBR139W	R.G]PCEDNSTDGMC@YTGLR.Y	YBR139W	3.791	966.881	1.13	Putative serine type carboxypeptidase with a role in phytochelatin synthesis; green fluorescent protein (GFP)-fusion protein localizes to the vacuole; expression induced by nitrogen limitation in a GLN3, GAT1-independent manner
YBR142W	K.IC@EPVLAK.S	MAK5	2.29	465.26	0.5	Essential nucleolar protein, putative DEAD-box RNA helicase required for maintenance of M1 dsRNA virus; involved in biogenesis of large (60S) ribosomal subunits
YBR143C	K.FC@YGIDDTLK.A	SUP45	3.092	616.287	0.26	Polypeptide release factor involved in translation termination; mutant form acts as a recessive omnipotent suppressor
YBR143C	K.NGLVLYCGD#IITEDGK.E	SUP45	3.741	883.935	0.11	Polypeptide release factor involved in translation termination; mutant form acts as a recessive omnipotent suppressor
YBR148W	K.SPE#KIPSK#DQCLTK#.G	YSW1	2.648	582.301	-0.02	Protein expressed specifically in spores
YBR151W	K.IHFVVPTSQIDWQHD#ACLEDPK.S	APD1	3.216	659.571	0.11	Protein of unknown function, required for normal localization of actin patches and for normal tolerance of sodium ions and hydrogen peroxide; localizes to both cytoplasm and nucleus
YBR151W	K.ISQWC@DK.N	APD1	2.156	468.716	-0.38	Protein of unknown function, required for normal localization of actin patches and for normal tolerance of sodium ions and hydrogen peroxide; localizes to both cytoplasm and nucleus
YBR151W	K.TLNC@AVSSLPK.D	APD1	3.578	595.316	0.03	Protein of unknown function, required for normal localization of actin patches and for normal tolerance of sodium ions and hydrogen peroxide; localizes to both cytoplasm and nucleus
YBR151W	R.C]GITAPYLK.K	APD1	2.358	511.771	0.39	Protein of unknown function, required for normal localization of actin patches and for normal tolerance of sodium ions and hydrogen peroxide; localizes to both cytoplasm and nucleus
YBR152W	K.Q]CLLLDDNDEVDSEK.E	SPP381	3.271	896.899	0.44	mRNA splicing factor, component of U4/U6.U5 tri-snRNP; interacts genetically and physically with Prp38p
YBR152W	K.QC@LLLDDNDEVDSEK.E	SPP381	3.597	896.9	0.94	mRNA splicing factor, component of U4/U6.U5 tri-snRNP; interacts genetically and physically with Prp38p
YBR155W	K.GLAVECE#DK.S	CNS1	2.757	510.737	0.46	TPR-containing co-chaperone; binds both Hsp82p (Hsp90) and Ssa1p (Hsp70) and stimulates the ATPase activity of SSA1, ts mutants reduce Hsp82p function while over expression suppresses the phenotypes of an HSP82 ts allele and a cpr7 deletion
YBR155W	R.AAC@ELELK.N	CNS1	2.718	467.239	-0.23	TPR-containing co-chaperone; binds both Hsp82p (Hsp90) and Ssa1p (Hsp70) and stimulates the ATPase activity of SSA1, ts mutants reduce Hsp82p function while over expression suppresses the phenotypes of an HSP82 ts allele and a cpr7 deletion
YBR162C	K.QSIE#SCKEGEAVVSR.H	TOS1	3.321	560.273	-0.36	Covalently-bound cell wall protein of unknown function; identified as a cell cycle regulated SBF target gene; deletion mutants are highly resistant to treatment with beta-1,3-glucanase; has sequence similarity to YJL171C
YBR162C	R.TLQYGDASC@SC@WK.T	TOS1	3.786	788.332	-0.29	Covalently-bound cell wall protein of unknown function; identified as a cell cycle regulated SBF target gene; deletion mutants are highly resistant to treatment with beta-1,3-glucanase; has sequence similarity to YJL171C
YBR169C	K.GAAFIC@AIHSPTLR.V	SSE2	1.887	505.27	0.11	Member of the heat shock protein 70 (HSP70) family; may be involved in protein folding; localized to the cytoplasm; highly homologous to the heat shock protein Sse1p
YBR170C	K.C]QPSAITLQQQEFR.M	NPL4	3.552	853.42	0.03	Endoplasmic reticulum and nuclear membrane protein, forms a complex with Cdc48p and Ufd1p that recognizes ubiquitinated proteins in the endoplasmic reticulum and delivers them to the proteasome for degradation
YBR170C	R.G]ICSKC@QPSAITLQQQEFR.M	NPL4	4.202	751.036	-1.29	Endoplasmic reticulum and nuclear membrane protein, forms a complex with Cdc48p and Ufd1p that recognizes ubiquitinated proteins in the endoplasmic reticulum and delivers them to the proteasome for degradation
YBR170C	R.GMC@EYC@SPLPPWDK.E	NPL4	2.684	878.361	-1.12	Endoplasmic reticulum and nuclear membrane protein, forms a complex with Cdc48p and Ufd1p that recognizes ubiquitinated proteins in the endoplasmic reticulum and delivers them to the proteasome for degradation
YBR170C	R.VSC@QENDLFGTVIEK.L	NPL4	4.321	869.917	-2.69	Endoplasmic reticulum and nuclear membrane protein, forms a complex with Cdc48p and Ufd1p that recognizes ubiquitinated proteins in the endoplasmic reticulum and delivers them to the proteasome for degradation
YBR191W	K.C]RQEFLER.V	RPL21A	2.857	379.854	-0.34	Protein component of the large (60S) ribosomal subunit, nearly identical to Rpl21Bp and has similarity to rat L21 ribosomal protein
YBR198C	K.IWSLDGSSLNNPNIALNNNDKDEDPTC@K.T	TAF5	3.425	1048.82	0.5	Subunit (90 kDa) of TFIID and SAGA complexes, involved in RNA polymerase II transcription initiation and in chromatin modification
YBR199W	K.ENIQYAEVESYH#NMCR.F	KTR4	2.92	686.96	0	Putative mannosyltransferase involved in protein glycosylation; member of the KRE2/MNT1 mannosyltransferase family
YBR199W	K.ENIQYAEVESYHNMCR[.F	KTR4	2.078	686.96	0.13	Putative mannosyltransferase involved in protein glycosylation; member of the KRE2/MNT1 mannosyltransferase family
YBR202W	R.TFTPLSE#CTSE#ECSQNQTK.G	MCM7	2.28	749.655	-1.34	Component of the hexameric MCM complex, which is important for priming origins of DNA replication in G1 and becomes an active ATP-dependent helicase that promotes DNA melting and elongation when activated by Cdc7p-Dbf4p in S-phase
YBR208C	K.SFIC@EESGYK.A	DUR1	2.491	610.269	-0.1	Urea amidolyase, contains both urea carboxylase and allophanate hydrolase activities, degrades urea to CO2 and NH3; expression sensitive to nitrogen catabolite repression and induced by allophanate, an intermediate in allantoin degradation
YBR208C	K.VYGC@ITNIDYLK.S	DUR1	3.85	729.869	0.75	Urea amidolyase, contains both urea carboxylase and allophanate hydrolase activities, degrades urea to CO2 and NH3; expression sensitive to nitrogen catabolite repression and induced by allophanate, an intermediate in allantoin degradation
YBR208C	R.GLPTTAAC@PSFAYEPSK.D	DUR1	3.972	898.931	1.21	Urea amidolyase, contains both urea carboxylase and allophanate hydrolase activities, degrades urea to CO2 and NH3; expression sensitive to nitrogen catabolite repression and induced by allophanate, an intermediate in allantoin degradation
YBR214W	K.QLTADC@QNGKPVPVGEMVK.L	SDS24	3.235	691.016	0.59	One of two S. cerevisiae homologs (Sds23p and Sds24p) of the Schizosaccharomyces pombe Sds23 protein, which genetic studies have implicated in APC/cyclosome regulation; may play an indirect role in fluid-phase endocytosis
YBR218C	K.C]SC@SGSTYEIVR.R	PYC2	3.095	709.806	0.66	Pyruvate carboxylase isoform, cytoplasmic enzyme that converts pyruvate to oxaloacetate; highly similar to isoform Pyc1p but differentially regulated; mutations in the human homolog are associated with lactic acidosis
YBR218C	K.IREDLQNRFGDIDECD#VASYNMYPR.V	PYC2	3.559	773.852	0.76	Pyruvate carboxylase isoform, cytoplasmic enzyme that converts pyruvate to oxaloacetate; highly similar to isoform Pyc1p but differentially regulated; mutations in the human homolog are associated with lactic acidosis
YBR218C	K.LTC@RPGLELEPFDLEK.I	PYC2	3.459	639.664	0.16	Pyruvate carboxylase isoform, cytoplasmic enzyme that converts pyruvate to oxaloacetate; highly similar to isoform Pyc1p but differentially regulated; mutations in the human homolog are associated with lactic acidosis
YBR218C	R.FGDIDE#CDVASYNMYPR.V	PYC2	3.021	1034.42	-0.15	Pyruvate carboxylase isoform, cytoplasmic enzyme that converts pyruvate to oxaloacetate; highly similar to isoform Pyc1p but differentially regulated; mutations in the human homolog are associated with lactic acidosis
YBR218C	R.FGDIDEC@DVASYNMYPR.V	PYC2	4.442	1034.42	-0.13	Pyruvate carboxylase isoform, cytoplasmic enzyme that converts pyruvate to oxaloacetate; highly similar to isoform Pyc1p but differentially regulated; mutations in the human homolog are associated with lactic acidosis
YBR218C	R.KLTC@RPGLELEPFDLEK.I	PYC2	3.127	682.363	-0.07	Pyruvate carboxylase isoform, cytoplasmic enzyme that converts pyruvate to oxaloacetate; highly similar to isoform Pyc1p but differentially regulated; mutations in the human homolog are associated with lactic acidosis
YBR218C	R.TAFGNGTC@FVER.F	PYC2	3.325	679.812	0.15	Pyruvate carboxylase isoform, cytoplasmic enzyme that converts pyruvate to oxaloacetate; highly similar to isoform Pyc1p but differentially regulated; mutations in the human homolog are associated with lactic acidosis
YBR221C	K.C@QMVFR.G	PDB1	2.21	420.696	-0.26	E1 beta subunit of the pyruvate dehydrogenase (PDH) complex, which is an evolutionarily-conserved multi-protein complex found in mitochondria
YBR230C	K.E#CAIEYLK.A	OM14	2.259	513.252	0.21	Integral mitochondrial outer membrane protein; abundance is decreased in cells grown in glucose relative to other carbon sources; appears to contain 3 alpha-helical transmembrane segments; ORF encodes a 97-basepair intron
YBR234C	K.SILAVTC@ETDC@LVYR.V	ARC40	3.87	900.438	1.72	Subunit of the ARP2/3 complex, which is required for the motility and integrity of cortical actin patches
YBR244W	K.C@GFTPQYK.E	GPX2	2.942	500.731	-0.14	Phospholipid hydroperoxide glutathione peroxidase induced by glucose starvation that protects cells from phospholipid hydroperoxides and nonphospholipid peroxides during oxidative stress
YBR247C	K.GFLFPLVETGCNVR[.E	ENP1	2.153	804.913	-0.36	Protein associated with U3 and U14 snoRNAs, required for pre-rRNA processing and 40S ribosomal subunit synthesis; localized in the nucleus and concentrated in the nucleolus
YBR248C	K.YC@WYQC@TIK.G	HIS7	2.679	661.289	0.11	Imidazole glycerol phosphate synthase (glutamine amidotransferase:cyclase), catalyzes the fifth and sixth steps of histidine biosynthesis and also produces 5-aminoimidazole-4-carboxamide ribotide (AICAR), a purine precursor
YBR248C	R.AC@EALGAGEILLNC@IDK.D	HIS7	4.104	923.955	-0.34	Imidazole glycerol phosphate synthase (glutamine amidotransferase:cyclase), catalyzes the fifth and sixth steps of histidine biosynthesis and also produces 5-aminoimidazole-4-carboxamide ribotide (AICAR), a purine precursor
YBR249C	K.GNEH#CFVILR.G	ARO4	2.366	415.545	-0.16	3-deoxy-D-arabino-heptulosonate-7-phosphate (DAHP) synthase, catalyzes the first step in aromatic amino acid biosynthesis and is feedback-inhibited by tyrosine or high concentrations of phenylalanine or tryptophan
YBR261C	R.C]IVGLQPNGTIVVK.E	YBR261C	3.837	749.427	0.42	Putative S-adenosylmethionine-dependent methyltransferase of the seven beta-strand family; green fluorescent protein (GFP)-fusion protein localizes to the cytoplasm; YBR261C is not an essential gene
YBR263W	K.KLCNE#SSEVAALSGEISK.W	SHM1	3.245	641.323	0.41	Mitochondrial serine hydroxymethyltransferase, converts serine to glycine plus 5,10 methylenetetrahydrofolate; involved in generating precursors for purine, pyrimidine, amino acid, and lipid biosynthesis; reverse reaction generates serine
YBR263W	K.L]CNESSEVAALSGEISK.W	SHM1	4.613	598.624	-0.02	Mitochondrial serine hydroxymethyltransferase, converts serine to glycine plus 5,10 methylenetetrahydrofolate; involved in generating precursors for purine, pyrimidine, amino acid, and lipid biosynthesis; reverse reaction generates serine
YBR263W	K.SESLC@QAR.A	SHM1	2.525	475.722	-0.25	Mitochondrial serine hydroxymethyltransferase, converts serine to glycine plus 5,10 methylenetetrahydrofolate; involved in generating precursors for purine, pyrimidine, amino acid, and lipid biosynthesis; reverse reaction generates serine
YBR265W	K.QAC@DIIAK.S	TSC10	2.509	459.739	-0.03	3-ketosphinganine reductase, catalyzes the second step in phytosphingosine synthesis, essential for growth in the absence of exogenous dihydrosphingosine or phytosphingosine, member of short chain dehydrogenase/reductase protein family
YBR265W	R.LLDTC@NEIR.I	TSC10	2.648	567.285	0.15	3-ketosphinganine reductase, catalyzes the second step in phytosphingosine synthesis, essential for growth in the absence of exogenous dihydrosphingosine or phytosphingosine, member of short chain dehydrogenase/reductase protein family
YBR267W	K.IGLGNIC@IVC@NYQGR.T	REI1	3.299	868.932	-0.35	Cytoplasmic pre-60S factor; required for the correct recycling of shuttling factors Alb1, Arx1 and Tif6 at the end of the ribosomal large subunit biogenesis; involved in bud growth in the mitotic signaling network
YBR267W	R.NRVDIPLEQC@LFC@EHNK.H	REI1	3.602	724.681	-1.24	Cytoplasmic pre-60S factor; required for the correct recycling of shuttling factors Alb1, Arx1 and Tif6 at the end of the ribosomal large subunit biogenesis; involved in bud growth in the mitotic signaling network
YBR268W	K.SVVSSC@PAGTSLNLNIWK.S	MRPL37	3.758	966.996	0.39	Mitochondrial ribosomal protein of the large subunit
YBR272C	R.NLSADEEC@FNAIR.N	HSM3	4.178	769.85	1.75	Protein of unknown function, involved in DNA mismatch repair during slow growth; has weak similarity to Msh1p
YBR281C	R.EGGSISC@LR.M	DUG2	2.371	489.737	0.2	Probable di- and tri-peptidase; forms a complex with Dug1p and Dug3p to degrade glutathione (GSH) and other peptides containing a gamma-glu-X bond in an alternative pathway to GSH degradation by gamma-glutamyl transpeptidase (Ecm38p)
YBR282W	R.VQSEGATDTSCY#K.E	MRPL27	2.914	723.314	-0.89	Mitochondrial ribosomal protein of the large subunit
YBR283C	R.GVFGC@EPR.T	SSH1	2.699	461.216	-0.28	Subunit of the Ssh1 translocon complex; Sec61p homolog involved in co-translational pathway of protein translocation; not essential
YBR286W	K.C@PFGDK.S	APE3	2.515	362.16	0.02	Vacuolar aminopeptidase Y, processed to mature form by Prb1p
YBR286W	K.LVEIPNLGC@EEK.D	APE3	3.475	700.858	0.23	Vacuolar aminopeptidase Y, processed to mature form by Prb1p
YBR286W	K.LVEIPNLGCEEK.D	APE3	2.457	672.347	0.07	Vacuolar aminopeptidase Y, processed to mature form by Prb1p
YBR288C	R.G]CIEYENTGPNFTK.K	APM3	3.461	815.364	-0.17	Mu3-like subunit of the clathrin associated protein complex (AP-3); functions in transport of alkaline phosphatase to the vacuole via the alternate pathway
YBR288C	R.GC@IEYENTGPNFTK.K	APM3	3.758	815.364	-0.21	Mu3-like subunit of the clathrin associated protein complex (AP-3); functions in transport of alkaline phosphatase to the vacuole via the alternate pathway
YBR302C	K.QLIQFC@K.E	COS2	1.896	468.752	-0.43	Protein of unknown function, member of the DUP380 subfamily of conserved, often subtelomerically-encoded proteins
YCL009C	K.LVEPFGVLEC@AR.S	ILV6	3.745	695.364	0.35	Regulatory subunit of acetolactate synthase, which catalyzes the first step of branched-chain amino acid biosynthesis; enhances activity of the Ilv2p catalytic subunit, localizes to mitochondria
YCL009C	K.QHVLNC@LVQNEPGVLSR.V	ILV6	3.825	655.011	0.12	Regulatory subunit of acetolactate synthase, which catalyzes the first step of branched-chain amino acid biosynthesis; enhances activity of the Ilv2p catalytic subunit, localizes to mitochondria
YCL009C	R.KQH#VLNCLVQNEPGVLSR.V	ILV6	3.505	697.709	-0.46	Regulatory subunit of acetolactate synthase, which catalyzes the first step of branched-chain amino acid biosynthesis; enhances activity of the Ilv2p catalytic subunit, localizes to mitochondria
YCL011C	K.FTEGVNPGGD#RNCFIYC@SNLPFSTAR.S	GBP2	2.86	993.788	-0.62	Poly(A+) RNA-binding protein, involved in the export of mRNAs from the nucleus to the cytoplasm; similar to Hrb1p and Npl3p; also binds single-stranded telomeric repeat sequence in vitro
YCL011C	K.FTEGVNPGGDRNC@FIYC@SNLPFSTAR.S	GBP2	3.242	993.787	-1.17	Poly(A+) RNA-binding protein, involved in the export of mRNAs from the nucleus to the cytoplasm; similar to Hrb1p and Npl3p; also binds single-stranded telomeric repeat sequence in vitro
YCL011C	K.LNNYNYGGC@SLQISYAR.R	GBP2	2.643	996.965	0.08	Poly(A+) RNA-binding protein, involved in the export of mRNAs from the nucleus to the cytoplasm; similar to Hrb1p and Npl3p; also binds single-stranded telomeric repeat sequence in vitro
YCL011C	R.NLTFDC@TPEDLK.E	GBP2	2.819	726.838	0.26	Poly(A+) RNA-binding protein, involved in the export of mRNAs from the nucleus to the cytoplasm; similar to Hrb1p and Npl3p; also binds single-stranded telomeric repeat sequence in vitro
YCL019W	K.AVC@DNTPSIDTDPPEYR.S	YCL019W	3.363	975.431	0.32	Retrotransposon TYA Gag and TYB Pol genes; transcribed/translated as one unit; polyprotein is processed to make a nucleocapsid-like protein (Gag), reverse transcriptase (RT), protease (PR), and integrase (IN); similar to retroviral genes
YCL030C	K.FHAAQLPTETLEVETQPGVLC@SR.F	HIS4	3.093	861.767	-0.14	Multifunctional enzyme containing phosphoribosyl-ATP pyrophosphatase, phosphoribosyl-AMP cyclohydrolase, and histidinol dehydrogenase activities; catalyzes the second, third, ninth and tenth steps in histidine biosynthesis
YCL030C	K.FHAAQLPTETLEVETQPGVLCSRFPRPIE#K.V	HIS4	3.232	863.451	-0.6	Multifunctional enzyme containing phosphoribosyl-ATP pyrophosphatase, phosphoribosyl-AMP cyclohydrolase, and histidinol dehydrogenase activities; catalyzes the second, third, ninth and tenth steps in histidine biosynthesis
YCL030C	K.LLQISTDC@DSDALK.F	HIS4	3.526	789.888	-0.12	Multifunctional enzyme containing phosphoribosyl-ATP pyrophosphatase, phosphoribosyl-AMP cyclohydrolase, and histidinol dehydrogenase activities; catalyzes the second, third, ninth and tenth steps in histidine biosynthesis
YCL030C	K.LVDNAGSVFVGAYTPESC@GDYSSGTNHTLPTYGYAR.Q	HIS4	3.576	1276.25	-0.03	Multifunctional enzyme containing phosphoribosyl-ATP pyrophosphatase, phosphoribosyl-AMP cyclohydrolase, and histidinol dehydrogenase activities; catalyzes the second, third, ninth and tenth steps in histidine biosynthesis
YCL030C	R.C]LGLVYSSK.K	HIS4	2.969	513.768	0.04	Multifunctional enzyme containing phosphoribosyl-ATP pyrophosphatase, phosphoribosyl-AMP cyclohydrolase, and histidinol dehydrogenase activities; catalyzes the second, third, ninth and tenth steps in histidine biosynthesis
YCL030C	R.C]LGLVYSSKK.S	HIS4	2.47	385.546	-0.17	Multifunctional enzyme containing phosphoribosyl-ATP pyrophosphatase, phosphoribosyl-AMP cyclohydrolase, and histidinol dehydrogenase activities; catalyzes the second, third, ninth and tenth steps in histidine biosynthesis
YCL031C	K.FVDAASINNC@WNALK.K	RRP7	3.626	861.917	0.03	Essential protein involved in rRNA processing and ribosome biogenesis
YCL033C	R.HC@VNSASLNLKKD.-	YCL033C	4.351	495.921	0	Putative protein-methionine-R-oxide reductase; involved in response to oxidative stress; similar to mouse Sepx1p and fly SelRp; YCL033C is not an essential gene
YCL033C	R.VEIC@C@AR.C	YCL033C	2.075	454.21	-0.63	Putative protein-methionine-R-oxide reductase; involved in response to oxidative stress; similar to mouse Sepx1p and fly SelRp; YCL033C is not an essential gene
YCL040W	R.IC@SVNLHGDHTFSMEQMK.S	GLK1	3.085	722.651	-0.84	Glucokinase, catalyzes the phosphorylation of glucose at C6 in the first irreversible step of glucose metabolism; one of three glucose phosphorylating enzymes; expression regulated by non-fermentable carbon sources
YCL050C	K.EWIC@VVPR.S	APA1	2.432	529.776	0.09	Diadenosine 5',5''-P1,P4-tetraphosphate phosphorylase I (AP4A phosphorylase), involved in catabolism of bis(5'-nucleosidyl) tetraphosphates; has similarity to Apa2p
YCL050C	K.IGFNSTGY#CGMILTK.N	APA1	3.036	831.405	0.27	Diadenosine 5',5''-P1,P4-tetraphosphate phosphorylase I (AP4A phosphorylase), involved in catabolism of bis(5'-nucleosidyl) tetraphosphates; has similarity to Apa2p
YCL050C	K.IGFNSTGYC@GMILTK.N	APA1	2.796	839.403	0.19	Diadenosine 5',5''-P1,P4-tetraphosphate phosphorylase I (AP4A phosphorylase), involved in catabolism of bis(5'-nucleosidyl) tetraphosphates; has similarity to Apa2p
YCL050C	K.LLC@ALDNEESDKR.H	APA1	1.524	521.587	0.03	Diadenosine 5',5''-P1,P4-tetraphosphate phosphorylase I (AP4A phosphorylase), involved in catabolism of bis(5'-nucleosidyl) tetraphosphates; has similarity to Apa2p
YCL051W	K.QLPLTVGCD#SQSPK.E	LRE1	2.866	765.385	-0.34	Protein involved in control of cell wall structure and stress response; inhibits Cbk1p protein kinase activity; overproduction confers resistance to cell-wall degrading enzymes
YCL059C	K.ILQDDMAC@DVIK.I	KRR1	2.769	718.841	-0.3	Essential nucleolar protein required for the synthesis of 18S rRNA and for the assembly of 40S ribosomal subunit
YCL064C	K.YEC@LQPSGSFK.S	CHA1	3.012	658.303	0.06	Catabolic L-serine (L-threonine) deaminase, catalyzes the degradation of both L-serine and L-threonine; required to use serine or threonine as the sole nitrogen source, transcriptionally induced by serine and threonine
YCL064C	R.LSLPC@TVVVPTATK.K	CHA1	2.039	743.421	0.52	Catabolic L-serine (L-threonine) deaminase, catalyzes the degradation of both L-serine and L-threonine; required to use serine or threonine as the sole nitrogen source, transcriptionally induced by serine and threonine
YCR012W	K.DVTFLNDC@VGPEVEAAVK.A	PGK1	2.452	981.977	-0.22	3-phosphoglycerate kinase, catalyzes transfer of high-energy phosphoryl groups from the acyl phosphate of 1,3-bisphosphoglycerate to ADP to produce ATP; key enzyme in glycolysis and gluconeogenesis
YCR015C	K.C@SQSYNGEFDC@R.L	YCR015C	1.75	761.788	-0.18	Putative protein of unknown function; YCR015C is not an essential gene
YCR015C	K.C@SQSYNGEFDCR[.L	YCR015C	2.584	761.788	-0.11	Putative protein of unknown function; YCR015C is not an essential gene
YCR031C	K.CK#EVGITAVHVK.I	RPS14A	2.541	335.939	-0.49	Ribosomal protein 59 of the small subunit, required for ribosome assembly and 20S pre-rRNA processing; mutations confer cryptopleurine resistance; nearly identical to Rps14Bp and similar to E. coli S11 and rat S14 ribosomal proteins
YCR031C	K.VKADRDESSPYAAMLAAQDVAAK.C	RPS14A	3.126	606.552	0	Ribosomal protein 59 of the small subunit, required for ribosome assembly and 20S pre-rRNA processing; mutations confer cryptopleurine resistance; nearly identical to Rps14Bp and similar to E. coli S11 and rat S14 ribosomal proteins
YCR035C	R.VGAC@TDEEMTISQK.L	RRP43	2.313	784.85	0.31	Protein involved in rRNA processing; component of the exosome 3->5 exonuclease complex with Rrp41p, Rrp42p, Rrp4p and Dis3p; required for efficient maturation of 5.8S, 18S and 25S rRNA
YCR051W	K.MC@NEYNGDINVLDNDGDTPLHHVEDVATAR.L	YCR051W	3.546	850.876	-0.02	Putative protein of unknown function; green fluorescent protein (GFP)-fusion protein localizes to the cytoplasm and nucleus; contains ankyrin (Ank) repeats; YCR051W is not an essential gene
YCR053W	K.HYILDPHTAVGVC@ATER.L	THR4	2.262	646.988	-0.22	Threonine synthase, conserved protein that catalyzes formation of threonine from 0-phosphohomoserine; expression is regulated by the GCN4-mediated general amino acid control pathway
YCR053W	R.ISPIQEEQMTTVPDENVQTLSVTGTFDNCQD#IVK.A	THR4	3.124	1284.94	0.28	Threonine synthase, conserved protein that catalyzes formation of threonine from 0-phosphohomoserine; expression is regulated by the GCN4-mediated general amino acid control pathway
YCR054C	K.ND#PCC@VEDYEPIVENLNR.I	CTR86	3.391	1118.49	0.75	Essential protein of unknown function; upstream region contains a Gcn4p responsive site suggesting a possible role in amino acid biosynthesis
YCR060W	K.LGEYTQAIQMC@QQGLR.Y	TAH1	3.635	956.457	0.9	HSP90 cofactor; interacts with Hsp82p, Pih1p, Rvb1 and Rvb2, contains a single TPR domain with at least two TPR motifs
YCR060W	R.E]AVHCYDQLITAQPQNPVGYSNK.A	TAH1	3.694	878.087	0.19	HSP90 cofactor; interacts with Hsp82p, Pih1p, Rvb1 and Rvb2, contains a single TPR domain with at least two TPR motifs
YCR060W	R.EAVH#CYDQLITAQPQNPVGYSNK.A	TAH1	3.796	878.087	0.19	HSP90 cofactor; interacts with Hsp82p, Pih1p, Rvb1 and Rvb2, contains a single TPR domain with at least two TPR motifs
YCR063W	K.NETNNGSTC@IC@R.V	BUD31	2.55	713.296	-0.17	Protein involved in bud-site selection; analysis of integrated high-throughput datasets predicts an involvement in RNA splicing; diploid mutants display a random budding pattern instead of the wild-type bipolar pattern
YCR073W-A	K.VYHIDESLIDDPQEC@ADNYEK.V	SOL2	3.872	851.708	-0.22	Protein with a possible role in tRNA export; shows similarity to 6-phosphogluconolactonase non-catalytic domains but does not exhibit this enzymatic activity; homologous to Sol1p, Sol3p, and Sol4p
YCR073W-A	R.LVPFSSNESNYGC@AK.R	SOL2	2.848	836.885	-0.62	Protein with a possible role in tRNA export; shows similarity to 6-phosphogluconolactonase non-catalytic domains but does not exhibit this enzymatic activity; homologous to Sol1p, Sol3p, and Sol4p
YCR083W	K.C@DVDESPDIAK.E	TRX3	3.22	624.774	-0.51	Mitochondrial thioredoxin, highly conserved oxidoreductase required to maintain the redox homeostasis of the cell, forms the mitochondrial thioredoxin system with Trr2p, redox state is maintained by both Trr2p and Glr1p
YCR083W	K.CD#VDESPDIAKEC@EVTAMPTFVLGK.D	TRX3	5.181	943.101	1.43	Mitochondrial thioredoxin, highly conserved oxidoreductase required to maintain the redox homeostasis of the cell, forms the mitochondrial thioredoxin system with Trr2p, redox state is maintained by both Trr2p and Glr1p
YCR084C	K.FSNDGEYLATGC@NK.T	TUP1	4.845	788.341	-0.02	General repressor of transcription, forms complex with Cyc8p, involved in the establishment of repressive chromatin structure through interactions with histones H3 and H4, appears to enhance expression of some genes
YCR084C	K.SLDHTSVVC@C@VK.F	TUP1	3.424	468.892	-0.75	General repressor of transcription, forms complex with Cyc8p, involved in the establishment of repressive chromatin structure through interactions with histones H3 and H4, appears to enhance expression of some genes
YCR084C	R.SVC@FSPDGK.F	TUP1	2.549	498.727	0.38	General repressor of transcription, forms complex with Cyc8p, involved in the establishment of repressive chromatin structure through interactions with histones H3 and H4, appears to enhance expression of some genes
YCR087C-A	K.NHTSC@ISEDEK.Y	YCR087C-A	2.654	660.28	0.22	Putative protein of unknown function; green fluorescent protein (GFP)-fusion protein localizes to the nucleolus; YCR087C-A is not an essential gene
YCR087C-A	R.C@PNAYYTC@IDC@SK.T	YCR087C-A	4.342	826.33	-0.76	Putative protein of unknown function; green fluorescent protein (GFP)-fusion protein localizes to the nucleolus; YCR087C-A is not an essential gene
YCR090C	R.AEFAFDLQC@TSC@R.E	YCR090C	2.424	802.845	-0.44	Putative protein of unknown function; green fluorescent protein (GFP)-fusion protein localizes to the cytoplasm and nucleus; YCR090C is not an essential gene
YCR095C	R.VNEDDLC@REPEVPQR.L	YCR095C	2.853	619.292	0.59	Cytoplasmic protein required for replication of Brome mosaic virus in S. cerevisiae, which is a model system for studying replication of positive-strand RNA viruses in their natural hosts
YDL006W	K.LVGNSGC@TAAVC@VLR.W	PTC1	2.697	788.901	0.22	Type 2C protein phosphatase (PP2C); inactivates the osmosensing MAPK cascade by dephosphorylating Hog1p; mutation delays mitochondrial inheritance; deletion reveals defects in precursor tRNA splicing, sporulation and cell separation
YDL014W	K.ANC@IDSTVDAETVFAR.E	NOP1	4.907	884.912	-0.09	Nucleolar protein, component of the small subunit processome complex, which is required for processing of pre-18S rRNA; has similarity to mammalian fibrillarin
YDL014W	R.DHC@IVVGR.Y	NOP1	2.894	478.243	1.69	Nucleolar protein, component of the small subunit processome complex, which is required for processing of pre-18S rRNA; has similarity to mammalian fibrillarin
YDL021W	R.HSAELIEQY#CK.A	GPM2	2.276	689.327	-0.54	Homolog of Gpm1p phosphoglycerate mutase which converts 3-phosphoglycerate to 2-phosphoglycerate in glycolysis; may be non-functional derivative of a gene duplication event
YDL021W	R.TQQTIETMC@EEFK.L	GPM2	2.464	830.864	0.59	Homolog of Gpm1p phosphoglycerate mutase which converts 3-phosphoglycerate to 2-phosphoglycerate in glycolysis; may be non-functional derivative of a gene duplication event
YDL022W	K.ELLNGQSAQGLITC@K.E	GPD1	3.483	816.425	0.51	NAD-dependent glycerol-3-phosphate dehydrogenase, key enzyme of glycerol synthesis, essential for growth under osmotic stress; expression regulated by high-osmolarity glycerol response pathway; homolog of Gpd2p
YDL022W	R.LMATSGKDAWEC@EK.E	GPD1	2.99	813.368	-0.25	NAD-dependent glycerol-3-phosphate dehydrogenase, key enzyme of glycerol synthesis, essential for growth under osmotic stress; expression regulated by high-osmolarity glycerol response pathway; homolog of Gpd2p
YDL022W	R.LMATSGKDAWECEK#ELLNGQSAQGLITC@K.E	GPD1	2.468	814.392	-0.37	NAD-dependent glycerol-3-phosphate dehydrogenase, key enzyme of glycerol synthesis, essential for growth under osmotic stress; expression regulated by high-osmolarity glycerol response pathway; homolog of Gpd2p
YDL040C	K.LALC@FASLNK.F	NAT1	3.14	568.81	0.09	Subunit of the N-terminal acetyltransferase NatA (Nat1p, Ard1p, Nat5p); N-terminally acetylates many proteins, which influences multiple processes such as the cell cycle, heat-shock resistance, mating, sporulation, and telomeric silencing
YDL040C	K.QFEDDQLDFHSY#CMR.K	NAT1	2.878	669.605	0.08	Subunit of the N-terminal acetyltransferase NatA (Nat1p, Ard1p, Nat5p); N-terminally acetylates many proteins, which influences multiple processes such as the cell cycle, heat-shock resistance, mating, sporulation, and telomeric silencing
YDL047W	K.DVVTVWSAPNYC@YR.C	SIT4	3.205	865.404	0.25	Type 2A-related serine-threonine phosphatase that functions in the G1/S transition of the mitotic cycle; cytoplasmic and nuclear protein that modulates functions mediated by Pkc1p including cell wall and actin cytoskeleton organization
YDL053C	K.KYGC@LSDIAK.V	PBP4	2.202	385.534	0.29	Pbp1p binding protein, interacts strongly with Pab1p-binding protein 1 (Pbp1p) in the yeast two-hybrid system; also interacts with Lsm12p in a copurification assay
YDL053C	K.YGC@LSDIAK.V	PBP4	3.08	513.75	0.04	Pbp1p binding protein, interacts strongly with Pab1p-binding protein 1 (Pbp1p) in the yeast two-hybrid system; also interacts with Lsm12p in a copurification assay
YDL055C	K.STIVGWNSTVGQWCR[.L	PSA1	2.855	584.282	-0.62	GDP-mannose pyrophosphorylase (mannose-1-phosphate guanyltransferase), synthesizes GDP-mannose from GTP and mannose-1-phosphate in cell wall biosynthesis; required for normal cell wall structure
YDL055C	R.SVVLC@NSTIK.N	PSA1	2.292	560.805	-0.03	GDP-mannose pyrophosphorylase (mannose-1-phosphate guanyltransferase), synthesizes GDP-mannose from GTP and mannose-1-phosphate in cell wall biosynthesis; required for normal cell wall structure
YDL058W	K.ELQDEC@NFK.E	USO1	2.501	591.758	-0.07	Essential protein involved in intracellular protein transport, coiled-coil protein necessary for transport from ER to Golgi; required for assembly of the ER-to-Golgi SNARE complex
YDL058W	R.EMQAVEENCK#.N	USO1	2.293	619.263	0.11	Essential protein involved in intracellular protein transport, coiled-coil protein necessary for transport from ER to Golgi; required for assembly of the ER-to-Golgi SNARE complex
YDL061C	K.YDLNIC@R.Q	RPS29B	3.106	477.229	0.14	Protein component of the small (40S) ribosomal subunit; nearly identical to Rps29Ap and has similarity to rat S29 and E. coli S14 ribosomal proteins
YDL061C	R.KYDLNIC@R.Q	RPS29B	2.921	541.277	0.14	Protein component of the small (40S) ribosomal subunit; nearly identical to Rps29Ap and has similarity to rat S29 and E. coli S14 ribosomal proteins
YDL061C	R.QC@RVC@SSHTGLVR.K	RPS29B	3.88	520.589	-0.13	Protein component of the small (40S) ribosomal subunit; nearly identical to Rps29Ap and has similarity to rat S29 and E. coli S14 ribosomal proteins
YDL061C	R.VC@SSHTGLVR.K	RPS29B	2.675	558.285	-0.23	Protein component of the small (40S) ribosomal subunit; nearly identical to Rps29Ap and has similarity to rat S29 and E. coli S14 ribosomal proteins
YDL066W	K.C]ATITPDEAR.V	IDP1	2.47	567.266	-0.58	Mitochondrial NADP-specific isocitrate dehydrogenase, catalyzes the oxidation of isocitrate to alpha-ketoglutarate; not required for mitochondrial respiration and may function to divert alpha-ketoglutarate to biosynthetic processes
YDL066W	K.DLALAC@GNNER.S	IDP1	3.887	616.788	-0.22	Mitochondrial NADP-specific isocitrate dehydrogenase, catalyzes the oxidation of isocitrate to alpha-ketoglutarate; not required for mitochondrial respiration and may function to divert alpha-ketoglutarate to biosynthetic processes
YDL066W	K.RGELDNTPALC@K.F	IDP1	2.459	687.346	-0.11	Mitochondrial NADP-specific isocitrate dehydrogenase, catalyzes the oxidation of isocitrate to alpha-ketoglutarate; not required for mitochondrial respiration and may function to divert alpha-ketoglutarate to biosynthetic processes
YDL066W	R.GELDNTPALC@K.F	IDP1	3.219	609.295	-0.43	Mitochondrial NADP-specific isocitrate dehydrogenase, catalyzes the oxidation of isocitrate to alpha-ketoglutarate; not required for mitochondrial respiration and may function to divert alpha-ketoglutarate to biosynthetic processes
YDL066W	R.GELDNTPALCK#.F	IDP1	2.702	609.295	-0.62	Mitochondrial NADP-specific isocitrate dehydrogenase, catalyzes the oxidation of isocitrate to alpha-ketoglutarate; not required for mitochondrial respiration and may function to divert alpha-ketoglutarate to biosynthetic processes
YDL079C	K.IC@DFGSAK.C	MRK1	1.938	449.21	-0.27	Glycogen synthase kinase 3 (GSK-3) homolog; one of four GSK-3 homologs in S. cerevisiae that function to activate Msn2p-dependent transcription of stress responsive genes and that function in protein degradation
YDL084W	K.NFVIDECD#K.V	SUB2	2.19	570.255	-0.35	Component of the TREX complex required for nuclear mRNA export; member of the DEAD-box RNA helicase superfamily and is involved in early and late steps of spliceosome assembly; homolog of the human splicing factor hUAP56
YDL084W	R.IC@VSTDVFGR.G	SUB2	3.188	577.287	-0.28	Component of the TREX complex required for nuclear mRNA export; member of the DEAD-box RNA helicase superfamily and is involved in early and late steps of spliceosome assembly; homolog of the human splicing factor hUAP56
YDL086W	R.V]TCATC@FFPTDIHSR.T	YDL086W	2.937	906.413	-1.03	Putative protein of unknown function; the authentic, non-tagged protein is detected in highly purified mitochondria in high-throughput studies; YDL086W is not an essential gene
YDL086W	R.VTC@ATC@FFPTDIHSR.T	YDL086W	3.062	604.612	0.09	Putative protein of unknown function; the authentic, non-tagged protein is detected in highly purified mitochondria in high-throughput studies; YDL086W is not an essential gene
YDL087C	K.LQVCE#VC@GAYLSR.L	LUC7	3.48	777.872	-2.21	Essential protein associated with the U1 snRNP complex; splicing factor involved in recognition of 5' splice site; contains two zinc finger motifs; N-terminal zinc finger binds pre-mRNA
YDL088C	R.GSLIGC@IPYSK.N	ASM4	2.973	597.813	0.44	Nuclear pore complex subunit, part of a subcomplex also containing Nup53p, Nup170p, and Pse1p
YDL088C	R.IFHNHDTGC@DENDSTVNK.S	ASM4	4.975	701.632	-0.2	Nuclear pore complex subunit, part of a subcomplex also containing Nup53p, Nup170p, and Pse1p
YDL089W	R.INQC@SNIDTLSSAMGTR.S	YDL089W	3.871	934.436	0.44	Protein of unknown function; interacts with meiotic division protein Csm1p; green fluorescent protein (GFP)-fusion protein localizes to the nuclear periphery, potential Cdc28p substrate
YDL097C	K.FEQVPDSLDDQIFVC@EK.S	RPN6	3.054	1034.98	-2.26	Essential, non-ATPase regulatory subunit of the 26S proteasome lid required for the assembly and activity of the 26S proteasome; the human homolog (S9 protein) partially rescues Rpn6p depletion
YDL100C	K.MPLC@AGEIR.G	GET3	2.78	531.757	-0.56	Guanine nucleotide exchange factor for Gpa1p; amplifies G protein signaling; subunit of the GET complex, which is involved in Golgi to ER trafficking; has low-level ATPase activity and is involved in resistance to heat and metal stress
YDL100C	K.VTGMNNLSC@MEIDPSAALK.D	GET3	4.53	1041.98	2.97	Guanine nucleotide exchange factor for Gpa1p; amplifies G protein signaling; subunit of the GET complex, which is involved in Golgi to ER trafficking; has low-level ATPase activity and is involved in resistance to heat and metal stress
YDL100C	R.KVTGMNNLSC@MEIDPSAALK.D	GET3	5.473	732.355	0.59	Guanine nucleotide exchange factor for Gpa1p; amplifies G protein signaling; subunit of the GET complex, which is involved in Golgi to ER trafficking; has low-level ATPase activity and is involved in resistance to heat and metal stress
YDL103C	K.FGC@LEVDR.C	QRI1	2.832	498.234	-0.82	UDP-N-acetylglucosamine pyrophosphorylase, catalyzes the formation of UDP-N-acetylglucosamine (UDP-GlcNAc), which is important in cell wall biosynthesis, protein N-glycosylation, and GPI anchor biosynthesis
YDL103C	K.GC@YDIGLPSKK.S	QRI1	2.431	413.213	-0.2	UDP-N-acetylglucosamine pyrophosphorylase, catalyzes the formation of UDP-N-acetylglucosamine (UDP-GlcNAc), which is important in cell wall biosynthesis, protein N-glycosylation, and GPI anchor biosynthesis
YDL103C	K.LLEDC@QNAIK.F	QRI1	3.23	602.306	1.15	UDP-N-acetylglucosamine pyrophosphorylase, catalyzes the formation of UDP-N-acetylglucosamine (UDP-GlcNAc), which is important in cell wall biosynthesis, protein N-glycosylation, and GPI anchor biosynthesis
YDL112W	R.DTNTESVNNANISC@DTSPLQTK.S	TRM3	3.462	803.699	-0.05	2'-O-ribose methyltransferase, catalyzes the ribose methylation of the guanosine nucleotide at position 18 of tRNAs
YDL113C	K.SILQC@NPLDPTNTTR.I	ATG20	2.998	865.43	-0.44	Sorting nexin family member required for the cytoplasm-to-vacuole targeting (Cvt) pathway and for endosomal sorting; has a Phox homology domain that binds phosphatidylinositol-3-phosphate; interacts with Snx4p; potential Cdc28p substrate
YDL122W	R.IGC@LQC@GENGGIR.Y	UBP1	3.704	717.335	-0.14	Ubiquitin-specific protease that removes ubiquitin from ubiquitinated proteins; cleaves at the C terminus of ubiquitin fusions irrespective of their size; capable of cleaving polyubiquitin chains
YDL124W	K.FC@QEHDILVEAYSPLGPLQKK.T	YDL124W	3.386	824.758	-0.34	NADPH-dependent alpha-keto amide reductase; reduces aromatic alpha-keto amides, aliphatic alpha-keto esters, and aromatic alpha-keto esters; member of the aldo-keto reductase (AKR) family
YDL126C	R.LGDLVTIHPCPD#IK.Y	CDC48	2.487	526.617	0.87	ATPase in ER, nuclear membrane and cytosol with homology to mammalian p97; in a complex with Npl4p and Ufd1p participates in retrotranslocation of ubiquitinated proteins from the ER into the cytosol for degradation by the proteasome
YDL131W	R.VGIADTVGC@ANPR.Q	LYS21	3.275	665.333	0.05	Homocitrate synthase isozyme, catalyzes the condensation of acetyl-CoA and alpha-ketoglutarate to form homocitrate, which is the first step in the lysine biosynthesis pathway; highly similar to the other isozyme, Lys20p
YDL134C	K.C]EPLSEDDVAR.L	PPH21	3.42	645.785	-0.12	Catalytic subunit of protein phosphatase 2A, functionally redundant with Pph22p; methylated at C terminus; forms alternate complexes with several regulatory subunits; involved in signal transduction and regulation of mitosis
YDL134C	R.C@GNQAAIMEVDENHNR.Q	PPH21	3.399	625.269	-0.33	Catalytic subunit of protein phosphatase 2A, functionally redundant with Pph22p; methylated at C terminus; forms alternate complexes with several regulatory subunits; involved in signal transduction and regulation of mitosis
YDL140C	K.M]VCETDVPSEDDPTQLVSR.G	RPO21	3.742	1089.49	2.98	RNA polymerase II largest subunit B220, part of central core; phosphorylation of C-terminal heptapeptide repeat domain regulates association with transcription and splicing factors; similar to bacterial beta-prime
YDL140C	K.MVC@ETDVPSEDDPTQLVSR.G	RPO21	2.746	1097.48	-0.55	RNA polymerase II largest subunit B220, part of central core; phosphorylation of C-terminal heptapeptide repeat domain regulates association with transcription and splicing factors; similar to bacterial beta-prime
YDL140C	R.DAVTLFC@C@LLR.S	RPO21	4.011	684.344	0.15	RNA polymerase II largest subunit B220, part of central core; phosphorylation of C-terminal heptapeptide repeat domain regulates association with transcription and splicing factors; similar to bacterial beta-prime
YDL140C	R.FAAIWTLC@K.T	RPO21	3.218	555.294	0.33	RNA polymerase II largest subunit B220, part of central core; phosphorylation of C-terminal heptapeptide repeat domain regulates association with transcription and splicing factors; similar to bacterial beta-prime
YDL140C	R.G]GCGNTQPTIR.K	RPO21	2.828	580.777	0	RNA polymerase II largest subunit B220, part of central core; phosphorylation of C-terminal heptapeptide repeat domain regulates association with transcription and splicing factors; similar to bacterial beta-prime
YDL140C	R.GGC@GNTQPTIRK.D	RPO21	2.43	644.825	-0.15	RNA polymerase II largest subunit B220, part of central core; phosphorylation of C-terminal heptapeptide repeat domain regulates association with transcription and splicing factors; similar to bacterial beta-prime
YDL141W	K.TGLNC@NNDFNYVR.A	BPL1	3.875	793.855	0.14	Biotin:apoprotein ligase, covalently modifies proteins with the addition of biotin, required for acetyl-CoA carboxylase (Acc1p) holoenzyme formation
YDL143W	K.C@NVLLIQK.S	CCT4	2.642	494.286	0	Subunit of the cytosolic chaperonin Cct ring complex, related to Tcp1p, required for the assembly of actin and tubulins in vivo
YDL143W	R.AYLLNIC@K.K	CCT4	2.506	497.773	0.21	Subunit of the cytosolic chaperonin Cct ring complex, related to Tcp1p, required for the assembly of actin and tubulins in vivo
YDL144C	K.HGYTIESCD#YGR.L	YDL144C	2.061	729.309	-0.21	Putative protein of unknown function; green fluorescent protein (GFP)-fusion protein localizes to the cytoplasm and nucleus; YDL144C is not an essential gene.
YDL144C	K.VFKPSMC@VDC@EK.G	YDL144C	3.156	500.561	0.05	Putative protein of unknown function; green fluorescent protein (GFP)-fusion protein localizes to the cytoplasm and nucleus; YDL144C is not an essential gene.
YDL144C	K.VFKPSMC@VDCE#K.G	YDL144C	3.641	500.561	0.21	Putative protein of unknown function; green fluorescent protein (GFP)-fusion protein localizes to the cytoplasm and nucleus; YDL144C is not an essential gene.
YDL145C	K.AWEVDTC@R.G	COP1	2.591	518.73	0.13	Alpha subunit of COPI vesicle coatomer complex, which surrounds transport vesicles in the early secretory pathway
YDL145C	K.YFTNIYEGCR[.T	COP1	3.108	661.796	1.28	Alpha subunit of COPI vesicle coatomer complex, which surrounds transport vesicles in the early secretory pathway
YDL145C	R.HSAPGTSSFEEQMSAQQNLLDGSLGDC@VVK.F	COP1	4.282	1070.16	-0.04	Alpha subunit of COPI vesicle coatomer complex, which surrounds transport vesicles in the early secretory pathway
YDL145C	R.HSAPGTSSFEEQMSAQQNLLDGSLGDCVVK[.F	COP1	4.038	1070.16	-0.22	Alpha subunit of COPI vesicle coatomer complex, which surrounds transport vesicles in the early secretory pathway
YDL145C	R.TYIPSTPCE#LPAQLGYVR.A	COP1	2.659	689.019	0.59	Alpha subunit of COPI vesicle coatomer complex, which surrounds transport vesicles in the early secretory pathway
YDL148C	K.NISISC@PR.T	NOP14	2.22	473.742	0.21	Nucleolar protein, forms a complex with Noc4p that mediates maturation and nuclear export of 40S ribosomal subunits; also present in the small subunit processome complex, which is required for processing of pre-18S rRNA
YDL166C	K.D#NDCFEGYDEGRK.S	FAP7	1.923	802.817	-0.37	Essential NTPase required for small ribosome subunit synthesis, mediates processing of the 20S pre-rRNA at site D in the cytoplasm but associates only transiently with 43S preribosomes via Rps14p, may be the endonuclease for site D
YDL166C	K.DND#CFEGYDEGR.K	FAP7	3.385	738.771	0.63	Essential NTPase required for small ribosome subunit synthesis, mediates processing of the 20S pre-rRNA at site D in the cytoplasm but associates only transiently with 43S preribosomes via Rps14p, may be the endonuclease for site D
YDL166C	R.CD#NSNLYSR.L	FAP7	2.633	564.74	-0.19	Essential NTPase required for small ribosome subunit synthesis, mediates processing of the 20S pre-rRNA at site D in the cytoplasm but associates only transiently with 43S preribosomes via Rps14p, may be the endonuclease for site D
YDL166C	R.YGPNIIVTGTPGC@GK.S	FAP7	3.694	767.39	-0.23	Essential NTPase required for small ribosome subunit synthesis, mediates processing of the 20S pre-rRNA at site D in the cytoplasm but associates only transiently with 43S preribosomes via Rps14p, may be the endonuclease for site D
YDL168W	K.QY#CSQFGATDFVNPKEDLAK.D	SFA1	3.56	773.363	-0.25	Bifunctional enzyme containing both alcohol dehydrogenase and glutathione-dependent formaldehyde dehydrogenase activities, functions in formaldehyde detoxification and formation of long chain and complex alcohols, regulated by Hog1p-Sko1p
YDL168W	K.QYC@SQFGATDFVNPK.E	SFA1	4.008	881.399	-0.1	Bifunctional enzyme containing both alcohol dehydrogenase and glutathione-dependent formaldehyde dehydrogenase activities, functions in formaldehyde detoxification and formation of long chain and complex alcohols, regulated by Hog1p-Sko1p
YDL171C	K.KVIVVGGGDTGNDC@LGTSVR.H	GLT1	4.98	668.678	0.33	NAD(+)-dependent glutamate synthase (GOGAT), synthesizes glutamate from glutamine and alpha-ketoglutarate; with Gln1p, forms the secondary pathway for glutamate biosynthesis from ammonia; expression regulated by nitrogen source
YDL171C	K.S]NCGEGGEDAERSAVQENGDTMR.S	GLT1	2.289	829.003	-0.64	NAD(+)-dependent glutamate synthase (GOGAT), synthesizes glutamate from glutamine and alpha-ketoglutarate; with Gln1p, forms the secondary pathway for glutamate biosynthesis from ammonia; expression regulated by nitrogen source
YDL171C	K.SNCGE#GGEDAERSAVQENGDTMR.S	GLT1	2.762	829.003	-0.07	NAD(+)-dependent glutamate synthase (GOGAT), synthesizes glutamate from glutamine and alpha-ketoglutarate; with Gln1p, forms the secondary pathway for glutamate biosynthesis from ammonia; expression regulated by nitrogen source
YDL171C	K.TFACGD#C@R.R	GLT1	1.935	493.695	0.1	NAD(+)-dependent glutamate synthase (GOGAT), synthesizes glutamate from glutamine and alpha-ketoglutarate; with Gln1p, forms the secondary pathway for glutamate biosynthesis from ammonia; expression regulated by nitrogen source
YDL171C	K.VIVVGGGDTGNDC@LGTSVR.H	GLT1	3.555	938.464	-0.68	NAD(+)-dependent glutamate synthase (GOGAT), synthesizes glutamate from glutamine and alpha-ketoglutarate; with Gln1p, forms the secondary pathway for glutamate biosynthesis from ammonia; expression regulated by nitrogen source
YDL171C	R.C@GGLLMYGIPNMKLDK.A	GLT1	2.96	614.637	-0.19	NAD(+)-dependent glutamate synthase (GOGAT), synthesizes glutamate from glutamine and alpha-ketoglutarate; with Gln1p, forms the secondary pathway for glutamate biosynthesis from ammonia; expression regulated by nitrogen source
YDL171C	R.C]GGLLMYGIPNMKLDK.A	GLT1	2.934	614.636	-1.17	NAD(+)-dependent glutamate synthase (GOGAT), synthesizes glutamate from glutamine and alpha-ketoglutarate; with Gln1p, forms the secondary pathway for glutamate biosynthesis from ammonia; expression regulated by nitrogen source
YDL171C	R.CH#LNSC@AVGIATQDPYLR.S	GLT1	4.154	692.33	-2.3	NAD(+)-dependent glutamate synthase (GOGAT), synthesizes glutamate from glutamine and alpha-ketoglutarate; with Gln1p, forms the secondary pathway for glutamate biosynthesis from ammonia; expression regulated by nitrogen source
YDL174C	K.ICH#DNNMPVVPFSGGTSLEGHFLPTR.I	DLD1	3.033	966.794	0.38	D-lactate dehydrogenase, oxidizes D-lactate to pyruvate, transcription is heme-dependent, repressed by glucose, and derepressed in ethanol or lactate; located in the mitochondrial inner membrane
YDL174C	R.TPEEHETC@SQLVDR.M	DLD1	3.89	567.59	0.39	D-lactate dehydrogenase, oxidizes D-lactate to pyruvate, transcription is heme-dependent, repressed by glucose, and derepressed in ethanol or lactate; located in the mitochondrial inner membrane
YDL177C	K.NIEQGC@AD#CGEAGAGQR.L	YDL177C	3.666	896.87	-0.19	Putative protein of unknown function; similar to the mouse IMPACT gene; YDL177C is not an essential gene
YDL177C	K.NIEQGCAD#C@GEAGAGQR.L	YDL177C	2.849	896.87	-0.04	Putative protein of unknown function; similar to the mouse IMPACT gene; YDL177C is not an essential gene
YDL178W	K.VSLILNYC@NDEK.I	DLD2	3.827	734.361	0.07	D-lactate dehydrogenase, located in the mitochondrial matrix
YDL185W	K.GTNVLMADGSIEC@IENIEVGNK.V	TFP1	4.136	793.708	-2.4	Vacuolar ATPase V1 domain subunit A containing the catalytic nucleotide binding sites; protein precursor undergoes self-catalyzed splicing to yield the extein Tfp1p and the intein Vde (PI-SceI), which is a site-specific endonuclease
YDL185W	K.LNLC@AEYK.D	TFP1	2.432	505.752	-0.29	Vacuolar ATPase V1 domain subunit A containing the catalytic nucleotide binding sites; protein precursor undergoes self-catalyzed splicing to yield the extein Tfp1p and the intein Vde (PI-SceI), which is a site-specific endonuclease
YDL185W	K.LNLCAEYK.D	TFP1	2.213	477.242	0.41	Vacuolar ATPase V1 domain subunit A containing the catalytic nucleotide binding sites; protein precursor undergoes self-catalyzed splicing to yield the extein Tfp1p and the intein Vde (PI-SceI), which is a site-specific endonuclease
YDL195W	R.GNWC@FK.T	SEC31	1.762	406.181	-0.21	Essential phosphoprotein component (p150) of the COPII coat of secretory pathway vesicles, in complex with Sec13p; required for ER-derived transport vesicle formation
YDL201W	K.EWEENDEC@VK.I	TRM8	2.169	669.269	-0.33	Subunit of a tRNA methyltransferase complex composed of Trm8p and Trm82p that catalyzes 7-methylguanosine modification of tRNA
YDL201W	K.FVAC@FTR.L	TRM8	2.1	450.723	-0.25	Subunit of a tRNA methyltransferase complex composed of Trm8p and Trm82p that catalyzes 7-methylguanosine modification of tRNA
YDL205C	K.LIEEKYPDYDC@K.V	HEM3	2.01	524.913	0.06	Phorphobilinogen deaminase, catalyzes the conversion of 4-porphobilinogen to hydroxymethylbilane, the third step in the heme biosynthetic pathway; localizes to both the cytoplasm and nucleus; expression is regulated by Hap2p-Hap3p
YDL205C	K.R]VDPTDCLVMPFYSAYK.S	HEM3	3.886	693.328	-1.18	Phorphobilinogen deaminase, catalyzes the conversion of 4-porphobilinogen to hydroxymethylbilane, the third step in the heme biosynthetic pathway; localizes to both the cytoplasm and nucleus; expression is regulated by Hap2p-Hap3p
YDL205C	K.RVDPTDC@LVMPFYSAYK.S	HEM3	3.721	693.328	-1.15	Phorphobilinogen deaminase, catalyzes the conversion of 4-porphobilinogen to hydroxymethylbilane, the third step in the heme biosynthetic pathway; localizes to both the cytoplasm and nucleus; expression is regulated by Hap2p-Hap3p
YDL205C	R.TLEGGC@SVPIGVESK.Y	HEM3	3.663	766.885	0.08	Phorphobilinogen deaminase, catalyzes the conversion of 4-porphobilinogen to hydroxymethylbilane, the third step in the heme biosynthetic pathway; localizes to both the cytoplasm and nucleus; expression is regulated by Hap2p-Hap3p
YDL215C	K.GLDKDELC@R.L	GDH2	2.41	369.182	-0.43	NAD(+)-dependent glutamate dehydrogenase, degrades glutamate to ammonia and alpha-ketoglutarate; expression sensitive to nitrogen catabolite repression and intracellular ammonia levels
YDL224C	K.E#CSSTASASAFSK.N	WHI4	2.829	666.79	-0.02	Putative RNA binding protein and partially redundant Whi3p homolog that regulates the cell size requirement for passage through Start and commitment to cell division
YDL226C	K.C@MDC@GAPNPQWATPK.F	GCS1	4.83	874.863	-0.61	ADP-ribosylation factor GTPase activating protein (ARF GAP), involved in ER-Golgi transport; shares functional similarity with Glo3p
YDL226C	K.C]MDC@GAPNPQWATPK.F	GCS1	4.648	866.866	-0.12	ADP-ribosylation factor GTPase activating protein (ARF GAP), involved in ER-Golgi transport; shares functional similarity with Glo3p
YDL226C	K.LTC@LCE#DR.V	GCS1	2.247	533.736	-0.47	ADP-ribosylation factor GTPase activating protein (ARF GAP), involved in ER-Golgi transport; shares functional similarity with Glo3p
YDL229W	R.R]TFTTCADNQTTVQFPVYQGER.V	SSB1	3.865	873.747	-0.11	Cytoplasmic ATPase that is a ribosome-associated molecular chaperone, functions with J-protein partner Zuo1p; may be involved in folding of newly-made polypeptide chains; member of the HSP70 family; interacts with phosphatase subunit Reg1p
YDL229W	R.RTFTTC@ADNQTTVQFPVYQGER.V	SSB1	4.378	873.746	-0.65	Cytoplasmic ATPase that is a ribosome-associated molecular chaperone, functions with J-protein partner Zuo1p; may be involved in folding of newly-made polypeptide chains; member of the HSP70 family; interacts with phosphatase subunit Reg1p
YDL229W	R.T]FTTCADNQTTVQFPVYQGER.V	SSB1	3.722	821.712	-1.1	Cytoplasmic ATPase that is a ribosome-associated molecular chaperone, functions with J-protein partner Zuo1p; may be involved in folding of newly-made polypeptide chains; member of the HSP70 family; interacts with phosphatase subunit Reg1p
YDL229W	R.TFTTC@ADNQTTVQFPVY#QGERVNCK.E	SSB1	2.858	988.793	0.71	Cytoplasmic ATPase that is a ribosome-associated molecular chaperone, functions with J-protein partner Zuo1p; may be involved in folding of newly-made polypeptide chains; member of the HSP70 family; interacts with phosphatase subunit Reg1p
YDL229W	R.TFTTC@ADNQTTVQFPVYQGER.V	SSB1	3.419	1232.07	1.77	Cytoplasmic ATPase that is a ribosome-associated molecular chaperone, functions with J-protein partner Zuo1p; may be involved in folding of newly-made polypeptide chains; member of the HSP70 family; interacts with phosphatase subunit Reg1p
YDL229W	R.TFTTCAD#NQTTVQFPVYQGER.V	SSB1	3.972	821.713	0.14	Cytoplasmic ATPase that is a ribosome-associated molecular chaperone, functions with J-protein partner Zuo1p; may be involved in folding of newly-made polypeptide chains; member of the HSP70 family; interacts with phosphatase subunit Reg1p
YDL229W	R.VNCKE#NTLLGEFDLK.N	SSB1	3.136	593.97	0.88	Cytoplasmic ATPase that is a ribosome-associated molecular chaperone, functions with J-protein partner Zuo1p; may be involved in folding of newly-made polypeptide chains; member of the HSP70 family; interacts with phosphatase subunit Reg1p
YDL235C	R.IAWVC@ER.I	YPD1	1.832	467.234	0.24	Phosphorelay intermediate protein, phosphorylated by the plasma membrane sensor Sln1p in response to osmotic stress and then in turn phosphorylates the response regulators Ssk1p in the cytosol and Skn7p in the nucleus
YDL236W	K.DVSC@VIAGLDTK.V	PHO13	3.912	639.324	-0.66	Alkaline phosphatase specific for p-nitrophenyl phosphate, involved in dephosphorylation of histone II-A and casein
YDL237W	R.MDSNEISC@AK.S	YDL237W	3.135	577.745	0.27	Putative protein of unknown function; YDL237W is not an essential gene; null mutant displays decreased frequency of mitochondrial genome loss (petite formation) and severe growth defect in minimal glycerol media
YDR001C	K.LEMLGGLAAC@TER.S	NTH1	2.929	718.846	-1.36	Neutral trehalase, degrades trehalose; required for thermotolerance and may mediate resistance to other cellular stresses; may be phosphorylated by Cdc28p
YDR002W	K.I]CANHIIAPEYTLKPNVGSDR.S	YRB1	3.195	592.808	0.45	Ran GTPase binding protein; involved in nuclear protein import and RNA export, ubiquitin-mediated protein degradation during the cell cycle; shuttles between the nucleus and cytoplasm; is essential; homolog of human RanBP1
YDR002W	K.ICANH#IIAPEYTLKPNVGSDR.S	YRB1	3.94	1184.61	2.15	Ran GTPase binding protein; involved in nuclear protein import and RNA export, ubiquitin-mediated protein degradation during the cell cycle; shuttles between the nucleus and cytoplasm; is essential; homolog of human RanBP1
YDR005C	R.VNQTLNFETNDC@K.I	MAF1	3.259	791.861	-0.79	Negative regulator of RNA polymerase III; component of several signaling pathways that repress polymerase III transcription in response to changes in cellular environment; targets the initiation factor TFIIIB
YDR017C	R.IFRDDEC@LADNNNGVDSNNGGSVTC@ADK.I	KCS1	4.27	1019.77	0.98	Inositol hexakisphosphate (IP6) and inositol heptakisphosphate (IP7) kinase; generation of high energy inositol pyrophosphates by Kcs1p is required for many processes such as vacuolar biogenesis, stress response and telomere maintenance
YDR019C	K.ENDDNEFYIVTNAGCAE#R.D	GCV1	2.986	1058.95	0.53	T subunit of the mitochondrial glycine decarboxylase complex, required for the catabolism of glycine to 5,10-methylene-THF; expression is regulated by levels of levels of 5,10-methylene-THF in the cytoplasm
YDR019C	R.DTEFFHDELQNGSTLDC@QWK.I	GCV1	5.327	824.025	-0.87	T subunit of the mitochondrial glycine decarboxylase complex, required for the catabolism of glycine to 5,10-methylene-THF; expression is regulated by levels of levels of 5,10-methylene-THF in the cytoplasm
YDR023W	K.ELVSC@SNC@TDYQSR.N	SES1	3.849	859.859	-0.31	Cytosolic seryl-tRNA synthetase, class II aminoacyl-tRNA synthetase that aminoacylates tRNA(Ser), displays tRNA-dependent amino acid recognition which enhances discrimination of the serine substrate, interacts with peroxin Pex21p
YDR023W	K.ELVSCSNC@TDYQSR.N	SES1	2.607	831.347	-1.56	Cytosolic seryl-tRNA synthetase, class II aminoacyl-tRNA synthetase that aminoacylates tRNA(Ser), displays tRNA-dependent amino acid recognition which enhances discrimination of the serine substrate, interacts with peroxin Pex21p
YDR023W	K.EYKELVSC@SNC@TDYQSR.N	SES1	3.772	713.642	-0.18	Cytosolic seryl-tRNA synthetase, class II aminoacyl-tRNA synthetase that aminoacylates tRNA(Ser), displays tRNA-dependent amino acid recognition which enhances discrimination of the serine substrate, interacts with peroxin Pex21p
YDR023W	K.KYVHC@LNSTLAATQR.A	SES1	4.726	587.974	-0.12	Cytosolic seryl-tRNA synthetase, class II aminoacyl-tRNA synthetase that aminoacylates tRNA(Ser), displays tRNA-dependent amino acid recognition which enhances discrimination of the serine substrate, interacts with peroxin Pex21p
YDR023W	K.Y]VHCLNSTLAATQR.A	SES1	4.077	545.275	0.26	Cytosolic seryl-tRNA synthetase, class II aminoacyl-tRNA synthetase that aminoacylates tRNA(Ser), displays tRNA-dependent amino acid recognition which enhances discrimination of the serine substrate, interacts with peroxin Pex21p
YDR023W	R.ALC@C@ILENYQTEDGLVVPEVLRK.Y	SES1	5.676	907.131	0.19	Cytosolic seryl-tRNA synthetase, class II aminoacyl-tRNA synthetase that aminoacylates tRNA(Ser), displays tRNA-dependent amino acid recognition which enhances discrimination of the serine substrate, interacts with peroxin Pex21p
YDR028C	K.GFENC@HINNASK.L	REG1	4.388	695.812	0.09	Regulatory subunit of type 1 protein phosphatase Glc7p, involved in negative regulation of glucose-repressible genes
YDR035W	K.RIMIDC@SHGNSNK.D	ARO3	3.047	516.573	-0.14	3-deoxy-D-arabino-heptulosonate-7-phosphate (DAHP) synthase, catalyzes the first step in aromatic amino acid biosynthesis and is feedback-inhibited by phenylalanine or high concentration of tyrosine or tryptophan
YDR036C	K.LGIQSLC@K.I	EHD3	2.128	459.757	-0.49	3-hydroxyisobutyryl-CoA hydrolase, member of a family of enoyl-CoA hydratase/isomerases; non-tagged protein is detected in highly purified mitochondria in high-throughput studies; phosphorylated; mutation affects fluid-phase endocytosis
YDR037W	K.EIC@NAYTELNDPFDQR.A	KRS1	4.387	992.939	-0.39	Lysyl-tRNA synthetase; also identified as a negative regulator of general control of amino acid biosynthesis
YDR037W	K.EICNAYTELND#PFDQRAR.F	KRS1	1.978	738.008	0.16	Lysyl-tRNA synthetase; also identified as a negative regulator of general control of amino acid biosynthesis
YDR037W	K.ILVDNKLEC@PPPLTNAR.M	KRS1	2.617	650.687	0.02	Lysyl-tRNA synthetase; also identified as a negative regulator of general control of amino acid biosynthesis
YDR037W	K.ILVDNKLECPPPLTNAR.M	KRS1	2.749	631.68	0.1	Lysyl-tRNA synthetase; also identified as a negative regulator of general control of amino acid biosynthesis
YDR037W	K.KILVDNKLEC@PPPLTNAR.M	KRS1	2.616	693.386	0.11	Lysyl-tRNA synthetase; also identified as a negative regulator of general control of amino acid biosynthesis
YDR037W	K.LEC@PPPLTNAR.M	KRS1	2.152	634.327	0.72	Lysyl-tRNA synthetase; also identified as a negative regulator of general control of amino acid biosynthesis
YDR037W	R.DQPGLC@ER.F	KRS1	2.482	487.722	0.92	Lysyl-tRNA synthetase; also identified as a negative regulator of general control of amino acid biosynthesis
YDR038C	K.DVVPGDIC@LVK.V	ENA5	1.953	607.826	-0.02	Protein with similarity to P-type ATPase sodium pumps, member of the Na+ efflux ATPase family
YDR038C	K.ITPLTDC@DVETIR.K	ENA5	2.455	766.885	0.37	Protein with similarity to P-type ATPase sodium pumps, member of the Na+ efflux ATPase family
YDR038C	R.LGHDC@DGTYNSSCRD#VYR.S	ENA5	2.151	725.637	-0.75	Protein with similarity to P-type ATPase sodium pumps, member of the Na+ efflux ATPase family
YDR040C	K.F]CTMTGDGVNDSPSLK.M	ENA1	2.918	864.882	0.41	P-type ATPase sodium pump, involved in Na+ and Li+ efflux to allow salt tolerance
YDR047W	R.DFFQTC@R.D	HEM12	2.187	487.214	0.36	Uroporphyrinogen decarboxylase, catalyzes the fifth step in the heme biosynthetic pathway; localizes to both the cytoplasm and nucleus; activity inhibited by Cu2+, Zn2+, Fe2+, Fe3+ and sulfhydryl-specific reagents
YDR049W	K.C]DNIFIR.A	YDR049W	2.91	469.232	-0.19	Zinc finger protein; putative transcription factor that may interact with proteins involved in histone acetylation or deacetylation; may be involved in altering acetylation on histone lysines
YDR050C	R.LNTASIPENVEVVIC@PPATYLDYSVSLVK.K	TPI1	2.809	1064.56	0.77	Triose phosphate isomerase, abundant glycolytic enzyme; mRNA half-life is regulated by iron availability; transcription is controlled by activators Reb1p, Gcr1p, and Rap1p through binding sites in the 5' non-coding region
YDR051C	K.C@YLQYR.V	YDR051C	1.677	451.713	-0.59	Protein of unknown function; interacts with Hsp82p in two-hybrid assay; deletion confers sensitivity to Nickel
YDR051C	R.GLNNTGGVY#ENNEDNICEGKPGK.C	YDR051C	1.978	827.043	-0.56	Protein of unknown function; interacts with Hsp82p in two-hybrid assay; deletion confers sensitivity to Nickel
YDR051C	R.GLNNTGGVYENNEDNIC@EGKPGK.C	YDR051C	3.326	827.043	-0.52	Protein of unknown function; interacts with Hsp82p in two-hybrid assay; deletion confers sensitivity to Nickel
YDR057W	K.NASPILC@R.M	YOS9	1.876	465.745	-0.34	ER quality-control lectin; integral subunit of the HRD ligase; serves as a receptor for misfolded N-glycosylated proteins, participates in their targeting to ERAD; member of the OS-9 protein family
YDR062W	K.GQC@TDAALESVDK.Y	LCB2	3.069	697.317	-0.2	Component of serine palmitoyltransferase, responsible along with Lcb1p for the first committed step in sphingolipid synthesis, which is the condensation of serine with palmitoyl-CoA to form 3-ketosphinganine
YDR062W	K.GQC@TDAALESVDKYSIQSGGPR.A	LCB2	3.25	780.37	1.19	Component of serine palmitoyltransferase, responsible along with Lcb1p for the first committed step in sphingolipid synthesis, which is the condensation of serine with palmitoyl-CoA to form 3-ketosphinganine
YDR062W	R.IDD#CFSRPTTGVPGR.F	LCB2	3.113	559.938	-0.29	Component of serine palmitoyltransferase, responsible along with Lcb1p for the first committed step in sphingolipid synthesis, which is the condensation of serine with palmitoyl-CoA to form 3-ketosphinganine
YDR062W	R.TPEDC@KDDKYFVN.-	LCB2	2.519	544.24	-0.5	Component of serine palmitoyltransferase, responsible along with Lcb1p for the first committed step in sphingolipid synthesis, which is the condensation of serine with palmitoyl-CoA to form 3-ketosphinganine
YDR062W	R.VPLC@EPEELPDDIQK.E	LCB2	2.786	891.435	0.39	Component of serine palmitoyltransferase, responsible along with Lcb1p for the first committed step in sphingolipid synthesis, which is the condensation of serine with palmitoyl-CoA to form 3-ketosphinganine
YDR062W	R.VPLC@EPEELPDDIQKENEYGTLDSPGHLYQVK.S	LCB2	4.576	928.948	0.04	Component of serine palmitoyltransferase, responsible along with Lcb1p for the first committed step in sphingolipid synthesis, which is the condensation of serine with palmitoyl-CoA to form 3-ketosphinganine
YDR074W	K.DVSC@QDWVNLTEK.V	TPS2	4.297	797.363	-1.12	Phosphatase subunit of the trehalose-6-phosphate synthase/phosphatase complex, which synthesizes the storage carbohydrate trehalose; expression is induced by stress conditions and repressed by the Ras-cAMP pathway
YDR074W	R.IC@FQNESFSR.H	TPS2	2.961	644.293	-0.15	Phosphatase subunit of the trehalose-6-phosphate synthase/phosphatase complex, which synthesizes the storage carbohydrate trehalose; expression is induced by stress conditions and repressed by the Ras-cAMP pathway
YDR074W	R.IINC@VTQLPYK.I	TPS2	3.367	674.868	-0.1	Phosphatase subunit of the trehalose-6-phosphate synthase/phosphatase complex, which synthesizes the storage carbohydrate trehalose; expression is induced by stress conditions and repressed by the Ras-cAMP pathway
YDR089W	R.TYDFCE#K.L	YDR089W	1.56	481.7	-0.14	Protein of unknown function; deletion confers resistance to Nickel
YDR091C	K.LC@IEVTPTSK.I	RLI1	2.896	574.305	-0.04	Essential iron-sulfur protein required for ribosome biogenesis and translation initiation; facilitates binding of a multifactor complex (MFC) of translation initiation factors to the small ribosomal subunit; predicted ABC family ATPase
YDR091C	R.APESLLTGC@NR.F	RLI1	2.899	609.301	0.02	Essential iron-sulfur protein required for ribosome biogenesis and translation initiation; facilitates binding of a multifactor complex (MFC) of translation initiation factors to the small ribosomal subunit; predicted ABC family ATPase
YDR091C	R.FAIGMSC@VQE#ADVYMFDEPSSYLD#VK.Q	RLI1	2.179	779.598	-0.54	Essential iron-sulfur protein required for ribosome biogenesis and translation initiation; facilitates binding of a multifactor complex (MFC) of translation initiation factors to the small ribosomal subunit; predicted ABC family ATPase
YDR093W	R.TLQPNPECR[.F	DNF2	2.004	557.769	-0.31	Aminophospholipid translocase (flippase) that localizes primarily to the plasma membrane; contributes to endocytosis, protein transport and cell polarity; type 4 P-type ATPase
YDR096W	K.S]VHSGEK#PHSCPRC@GKR.F	GIS1	1.794	679.326	-1.18	JmjC domain-containing histone demethylase; transcription factor involved in the expression of genes during nutrient limitation; also involved in the negative regulation of DPP1 and PHR1
YDR098C	K.ELSGADPKEYVSLLEDC@K.N	GRX3	2.632	684.998	-0.33	Hydroperoxide and superoxide-radical responsive glutathione-dependent oxidoreductase; monothiol glutaredoxin subfamily member along with Grx4p and Grx5p; protects cells from oxidative damage
YDR098C	K.EYVSLLEDC@K.N	GRX3	3.08	628.298	0.71	Hydroperoxide and superoxide-radical responsive glutathione-dependent oxidoreductase; monothiol glutaredoxin subfamily member along with Grx4p and Grx5p; protects cells from oxidative damage
YDR117C	K.IC@SGSTTISESQTFK.C	TMA64	3.043	823.391	0.75	Protein of unknown function that associates with ribosomes; has a putative RNA binding domain
YDR117C	K.IGTLC@GIASK.Q	TMA64	3.17	510.281	0.26	Protein of unknown function that associates with ribosomes; has a putative RNA binding domain
YDR120C	K.AWDNLYGEEC@GQK.R	TRM1	3.915	785.335	-0.4	tRNA methyltransferase, localizes to both the nucleus and mitochondrion to produce the modified base N2,N2-dimethylguanosine in tRNAs in both compartments
YDR120C	R.DLSVTC@IK.A	TRM1	2.121	468.247	-0.17	tRNA methyltransferase, localizes to both the nucleus and mitochondrion to produce the modified base N2,N2-dimethylguanosine in tRNAs in both compartments
YDR127W	K.C@YGDSAQFVSDEDLR.F	ARO1	5.094	881.373	-0.22	Pentafunctional arom protein, catalyzes steps 2 through 6 in the biosynthesis of chorismate, which is a precursor to aromatic amino acids
YDR127W	K.DLKVPSDSSGPVGVC@TYDDHR.V	ARO1	2.809	768.69	0.14	Pentafunctional arom protein, catalyzes steps 2 through 6 in the biosynthesis of chorismate, which is a precursor to aromatic amino acids
YDR127W	K.EHVGVAVSC@VPADKPLDDELLSKLER.F	ARO1	3.089	719.876	-0.47	Pentafunctional arom protein, catalyzes steps 2 through 6 in the biosynthesis of chorismate, which is a precursor to aromatic amino acids
YDR127W	K.HCPSSTY#VIC@NDTNLSK.V	ARO1	3.825	665.968	-0.72	Pentafunctional arom protein, catalyzes steps 2 through 6 in the biosynthesis of chorismate, which is a precursor to aromatic amino acids
YDR127W	K.LDGAEPLEC@TSK.K	ARO1	3.122	660.311	-0.2	Pentafunctional arom protein, catalyzes steps 2 through 6 in the biosynthesis of chorismate, which is a precursor to aromatic amino acids
YDR127W	K.VPSDSSGPVGVC@TYDDHR.V	ARO1	3.209	649.955	0.2	Pentafunctional arom protein, catalyzes steps 2 through 6 in the biosynthesis of chorismate, which is a precursor to aromatic amino acids
YDR127W	K.WC@ASALGYK.L	ARO1	2.304	528.252	-0.7	Pentafunctional arom protein, catalyzes steps 2 through 6 in the biosynthesis of chorismate, which is a precursor to aromatic amino acids
YDR127W	R.AALYALHSLGC@K.K	ARO1	3.407	652.345	0.65	Pentafunctional arom protein, catalyzes steps 2 through 6 in the biosynthesis of chorismate, which is a precursor to aromatic amino acids
YDR127W	R.DVLKPMGC@K.I	ARO1	2.394	524.27	-0.07	Pentafunctional arom protein, catalyzes steps 2 through 6 in the biosynthesis of chorismate, which is a precursor to aromatic amino acids
YDR129C	K.DVSDGENYTILLNQLDPALC@SK.A	SAC6	4.051	822.402	1.5	Fimbrin, actin-bundling protein; cooperates with Scp1p (calponin/transgelin) in the organization and maintenance of the actin cytoskeleton
YDR129C	R.AEQVLQNAEKLDC@R.K	SAC6	2.546	837.417	-0.91	Fimbrin, actin-bundling protein; cooperates with Scp1p (calponin/transgelin) in the organization and maintenance of the actin cytoskeleton
YDR129C	R.AEQVLQNAEKLDC@RK.Y	SAC6	2.933	451.236	-0.31	Fimbrin, actin-bundling protein; cooperates with Scp1p (calponin/transgelin) in the organization and maintenance of the actin cytoskeleton
YDR135C	R.QLLC@LAR.A	YCF1	2.165	437.252	-0.29	Vacuolar glutathione S-conjugate transporter of the ATP-binding cassette family, has a role in detoxifying metals such as cadmium, mercury, and arsenite; also transports unconjugated bilirubin; similar to human cystic fibrosis protein CFTR
YDR141C	K.LKHDDEVSC@EELLAK.I	DOP1	3.186	595.961	-0.19	Protein of unknown function, essential for viability, involved in establishing cellular polarity and morphogenesis; the authentic, non-tagged protein is detected in highly purified mitochondria in high-throughput studies
YDR143C	R.LENSC@PLC@R.Q	SAN1	2.817	574.763	-0.03	Ubiquitin-protein ligase, involved in the proteasome-dependent degradation of aberrant nuclear proteins
YDR145W	K.TFYVEC@AR.H	TAF12	2.276	523.242	-0.2	Subunit (61/68 kDa) of TFIID and SAGA complexes, involved in RNA polymerase II transcription initiation and in chromatin modification, similar to histone H2A
YDR148C	K.AC@TLAAK.D	KGD2	1.78	367.697	0.07	Dihydrolipoyl transsuccinylase, component of the mitochondrial alpha-ketoglutarate dehydrogenase complex, which catalyzes the oxidative decarboxylation of alpha-ketoglutarate to succinyl-CoA in the TCA cycle; phosphorylated
YDR150W	K.C@KENPDVEFLK.E	NUM1	4.412	460.227	-0.31	Protein required for nuclear migration, localizes to the mother cell cortex and the bud tip; may mediate interactions of dynein and cytoplasmic microtubules with the cell cortex
YDR150W	K.CKE#NPDMEFLK.E	NUM1	3.132	470.885	-0.01	Protein required for nuclear migration, localizes to the mother cell cortex and the bud tip; may mediate interactions of dynein and cytoplasmic microtubules with the cell cortex
YDR150W	K.EVE#QPSLAYLVEHAKATDHH#LLSDSAYEDLVKCK.E	NUM1	2.994	988.988	-2.29	Protein required for nuclear migration, localizes to the mother cell cortex and the bud tip; may mediate interactions of dynein and cytoplasmic microtubules with the cell cortex
YDR150W	K.QIGC@YALDSK.E	NUM1	2.833	577.779	0.52	Protein required for nuclear migration, localizes to the mother cell cortex and the bud tip; may mediate interactions of dynein and cytoplasmic microtubules with the cell cortex
YDR150W	R.MANLKAD#ECGSGDEGDKTK.R	NUM1	3.223	675.966	-0.68	Protein required for nuclear migration, localizes to the mother cell cortex and the bud tip; may mediate interactions of dynein and cytoplasmic microtubules with the cell cortex
YDR150W	R.MANLKADE#CGSGDEGDKTK.R	NUM1	3.622	675.966	-1.06	Protein required for nuclear migration, localizes to the mother cell cortex and the bud tip; may mediate interactions of dynein and cytoplasmic microtubules with the cell cortex
YDR150W	R.MANLKADEC@GSGDEGDKTK.R	NUM1	2.986	675.966	-0.98	Protein required for nuclear migration, localizes to the mother cell cortex and the bud tip; may mediate interactions of dynein and cytoplasmic microtubules with the cell cortex
YDR155C	R.ALC@TGEK.G	CPR1	1.82	389.692	-0.19	Cytoplasmic peptidyl-prolyl cis-trans isomerase (cyclophilin), catalyzes the cis-trans isomerization of peptide bonds N-terminal to proline residues; binds the drug cyclosporin A
YDR158W	K.E#CDIVFSGLDADYAGAIEK.E	HOM2	6.434	1036.98	-1.18	Aspartic beta semi-aldehyde dehydrogenase, catalyzes the second step in the common pathway for methionine and threonine biosynthesis; expression regulated by Gcn4p and the general control of amino acid synthesis
YDR158W	K.EYVC@DAYK.L	HOM2	1.848	524.226	-0.18	Aspartic beta semi-aldehyde dehydrogenase, catalyzes the second step in the common pathway for methionine and threonine biosynthesis; expression regulated by Gcn4p and the general control of amino acid synthesis
YDR158W	K.EYVC@DAYKLGC@HSAPK.Q	HOM2	4.162	949.434	1.55	Aspartic beta semi-aldehyde dehydrogenase, catalyzes the second step in the common pathway for methionine and threonine biosynthesis; expression regulated by Gcn4p and the general control of amino acid synthesis
YDR158W	K.LLTPEEIKVSAQC@NR.V	HOM2	2.122	879.464	-0.11	Aspartic beta semi-aldehyde dehydrogenase, catalyzes the second step in the common pathway for methionine and threonine biosynthesis; expression regulated by Gcn4p and the general control of amino acid synthesis
YDR158W	K.QTDLLPESATDIIVSEC@K.S	HOM2	5.575	1010	-0.67	Aspartic beta semi-aldehyde dehydrogenase, catalyzes the second step in the common pathway for methionine and threonine biosynthesis; expression regulated by Gcn4p and the general control of amino acid synthesis
YDR158W	K.TC@LKEYVCD#AYK.L	HOM2	3.78	517.239	-0.32	Aspartic beta semi-aldehyde dehydrogenase, catalyzes the second step in the common pathway for methionine and threonine biosynthesis; expression regulated by Gcn4p and the general control of amino acid synthesis
YDR161W	R.A]CELDPEGQVGGPDK.F	YDR161W	4.769	786.354	0.22	Putative protein of unknown function; non-essential gene; proposed function in rRNA and ribosome biosynthesis based on transcriptional co-regulation
YDR164C	K.TLVDEC@LGENAER.K	SEC1	3.572	753.349	0.02	Sm-like protein involved in docking and fusion of exocytic vesicles through binding to assembled SNARE complexes at the membrane; localization to sites of secretion (bud neck and bud tip) is dependent on SNARE function
YDR166C	R.AC@LQNC@FQNDTNR.L	SEC5	3.797	820.849	-0.2	Essential 107kDa subunit of the exocyst complex (Sec3p, Sec5p, Sec6p, Sec8p, Sec10p, Sec15p, Exo70p, and Exo84p), which has the essential function of mediating polarized targeting of secretory vesicles to active sites of exocytosis
YDR166C	R.SNKD#SGSPLDYGFIPPNCNGLSCLR.Y	SEC5	2.83	904.423	-0.27	Essential 107kDa subunit of the exocyst complex (Sec3p, Sec5p, Sec6p, Sec8p, Sec10p, Sec15p, Exo70p, and Exo84p), which has the essential function of mediating polarized targeting of secretory vesicles to active sites of exocytosis
YDR170C	K.C@KGPENAGSTAETKETSNDATNGMK.T	SEC7	2.774	654.289	0.15	Guanine nucleotide exchange factor (GEF) for ADP ribosylation factors involved in proliferation of the Golgi, intra-Golgi transport and ER-to-Golgi transport; found in the cytoplasm and on Golgi-associated coated vesicles
YDR170C	K.IC@AKPLETELDMR.S	SEC7	2.986	531.266	0.4	Guanine nucleotide exchange factor (GEF) for ADP ribosylation factors involved in proliferation of the Golgi, intra-Golgi transport and ER-to-Golgi transport; found in the cytoplasm and on Golgi-associated coated vesicles
YDR170C	K.MVDVC@YYNMDR.I	SEC7	3.541	749.294	0.26	Guanine nucleotide exchange factor (GEF) for ADP ribosylation factors involved in proliferation of the Golgi, intra-Golgi transport and ER-to-Golgi transport; found in the cytoplasm and on Golgi-associated coated vesicles
YDR171W	R.RYPSYYHC@NTAR.N	HSP42	2.817	529.909	-0.08	Small heat shock protein (sHSP) with chaperone activity; forms barrel-shaped oligomers that suppress unfolded protein aggregation; involved in cytoskeleton reorganization after heat shock
YDR172W	K.ERYDQC@VSNVSNFLR.A	SUP35	4.724	629.632	-0.14	Translation termination factor eRF3; altered protein conformation creates the [PSI(+)] prion, a dominant cytoplasmically inherited protein aggregate that alters translational fidelity and creates a nonsense suppressor phenotype
YDR172W	K.TAVEIQNIYNETENEVDMAMCGE#QVK.L	SUP35	4.746	1016.45	0.12	Translation termination factor eRF3; altered protein conformation creates the [PSI(+)] prion, a dominant cytoplasmically inherited protein aggregate that alters translational fidelity and creates a nonsense suppressor phenotype
YDR172W	K.VIAVLETEAPVC@VETYQDYPQLGR.F	SUP35	5.411	917.462	0.08	Translation termination factor eRF3; altered protein conformation creates the [PSI(+)] prion, a dominant cytoplasmically inherited protein aggregate that alters translational fidelity and creates a nonsense suppressor phenotype
YDR172W	R.YDQC@VSNVSNFLR.A	SUP35	4.29	801.372	-0.49	Translation termination factor eRF3; altered protein conformation creates the [PSI(+)] prion, a dominant cytoplasmically inherited protein aggregate that alters translational fidelity and creates a nonsense suppressor phenotype
YDR182W	R.DPEQQTC@GQLR.E	CDC1	2.902	666.304	0.03	Putative membrane protein of unknown function involved in Mn2+ homeostasis; mutants display actin and general growth defects, heterogeneous cell cycle arrests, and pleiotropic defects in cell cycle progression and organelle distribution
YDR182W	R.ILLTHVPLWRDPEQQTCGQLR[.E	CDC1	3.439	640.842	-0.4	Putative membrane protein of unknown function involved in Mn2+ homeostasis; mutants display actin and general growth defects, heterogeneous cell cycle arrests, and pleiotropic defects in cell cycle progression and organelle distribution
YDR188W	K.IIDLKNEVC@GMDPDK.G	CCT6	2.384	582.951	-0.89	Subunit of the cytosolic chaperonin Cct ring complex, related to Tcp1p, essential protein that is required for the assembly of actin and tubulins in vivo; contains an ATP-binding motif
YDR188W	K.IIDLKNEVC@GMDPDKGFVIINQK.G	CCT6	3.594	888.125	0.41	Subunit of the cytosolic chaperonin Cct ring complex, related to Tcp1p, essential protein that is required for the assembly of actin and tubulins in vivo; contains an ATP-binding motif
YDR188W	K.NEVC@GMDPDK.G	CCT6	2.803	582.737	1.47	Subunit of the cytosolic chaperonin Cct ring complex, related to Tcp1p, essential protein that is required for the assembly of actin and tubulins in vivo; contains an ATP-binding motif
YDR190C	R.EAC@GVIVDLIK.A	RVB1	2.067	608.834	0.37	Essential protein involved in transcription regulation; component of chromatin remodeling complexes; required for assembly and function of the INO80 complex; member of the RUVB-like protein family
YDR201W	K.C@ANEPSTNLASTMLQTK.R	SPC19	3.281	933.44	-0.17	Essential subunit of the Dam1 complex (aka DASH complex), couples kinetochores to the force produced by MT depolymerization thereby aiding in chromosome segregation; also localized to nuclear side of spindle pole body
YDR207C	K.RGGSPSNDSQVQHNVHDDQC@AVGVAPR.N	UME6	3.696	722.586	-0.85	Key transcriptional regulator of early meiotic genes, binds URS1 upstream regulatory sequence, couples metabolic responses to nutritional cues with initiation and progression of meiosis, forms complex with Ime1p, and also with Sin3p-Rpd3p
YDR211W	K.DHISTMC@LSK.A	GCD6	2.676	596.278	-0.18	Catalytic epsilon subunit of the translation initiation factor eIF2B, the guanine-nucleotide exchange factor for eIF2; activity subsequently regulated by phosphorylated eIF2; first identified as a negative regulator of GCN4 expression
YDR211W	K.DVVLAQSC@K.I	GCD6	2.476	510.263	0.23	Catalytic epsilon subunit of the translation initiation factor eIF2B, the guanine-nucleotide exchange factor for eIF2; activity subsequently regulated by phosphorylated eIF2; first identified as a negative regulator of GCN4 expression
YDR211W	R.C]IYYQDLPLPSSR.E	GCD6	4.08	806.395	-0.27	Catalytic epsilon subunit of the translation initiation factor eIF2B, the guanine-nucleotide exchange factor for eIF2; activity subsequently regulated by phosphorylated eIF2; first identified as a negative regulator of GCN4 expression
YDR211W	R.N]CQIGENIR.I	GCD6	2.928	552.267	0.05	Catalytic epsilon subunit of the translation initiation factor eIF2B, the guanine-nucleotide exchange factor for eIF2; activity subsequently regulated by phosphorylated eIF2; first identified as a negative regulator of GCN4 expression
YDR212W	K.FSDDEC@ILIK.G	TCP1	3.857	620.301	1.12	Alpha subunit of chaperonin-containing T-complex, which mediates protein folding in the cytosol; involved in maintenance of actin cytoskeleton; homolog to Drosophila melanogaster and mouse tailless complex polypeptide
YDR212W	K.GIDDLC@LK.E	TCP1	2.23	467.239	-0.02	Alpha subunit of chaperonin-containing T-complex, which mediates protein folding in the cytosol; involved in maintenance of actin cytoskeleton; homolog to Drosophila melanogaster and mouse tailless complex polypeptide
YDR212W	K.SATESLLVPGYALNC@TVASQAMPK.R	TCP1	2.811	842.086	0.04	Alpha subunit of chaperonin-containing T-complex, which mediates protein folding in the cytosol; involved in maintenance of actin cytoskeleton; homolog to Drosophila melanogaster and mouse tailless complex polypeptide
YDR214W	K.NC@IGWAK.E	AHA1	2.264	424.708	-0.23	Co-chaperone that binds to Hsp82p and activates its ATPase activity; similar to Hch1p; expression is regulated by stresses such as heat shock
YDR214W	K.SVSSIEGDC@EVNQR.K	AHA1	3.693	790.354	-0.46	Co-chaperone that binds to Hsp82p and activates its ATPase activity; similar to Hch1p; expression is regulated by stresses such as heat shock
YDR214W	K.SVSSIEGDC@EVNQRK.G	AHA1	2.688	854.402	0.32	Co-chaperone that binds to Hsp82p and activates its ATPase activity; similar to Hch1p; expression is regulated by stresses such as heat shock
YDR216W	R.SFVC@EVC@TR.A	ADR1	2.408	579.258	0.12	Carbon source-responsive zinc-finger transcription factor, required for transcription of the glucose-repressed gene ADH2, of peroxisomal protein genes, and of genes required for ethanol, glycerol, and fatty acid utilization
YDR216W	R.SNC@LPTISANSEK.S	ADR1	2.351	710.841	0.24	Carbon source-responsive zinc-finger transcription factor, required for transcription of the glucose-repressed gene ADH2, of peroxisomal protein genes, and of genes required for ethanol, glycerol, and fatty acid utilization
YDR217C	R.SADNYDCALE#GIVTPK.R	RAD9	2.346	876.909	0.11	DNA damage-dependent checkpoint protein, required for cell-cycle arrest in G1/S, intra-S, and G2/M; transmits checkpoint signal by activating Rad53p and Chk1p; hyperphosphorylated by Mec1p and Tel1p; potential Cdc28p substrate
YDR221W	R.SC@ESQVSLLENELK.Q	GTB1	3.039	818.398	-0.64	Glucosidase II beta subunit, forms a complex with alpha subunit Rot2p, involved in removal of two glucose residues from N-linked glycans during glycoprotein biogenesis in the ER
YDR226W	K.DELTNNPAC@K.N	ADK1	3.497	581.264	-0.18	Adenylate kinase, required for purine metabolism; localized to the cytoplasm and the mitochondria; lacks cleavable signal sequence
YDR226W	K.IMDQGGLVSDDIMVNMIKDELTNNPAC@K.N	ADK1	4.476	1051.82	-1.05	Adenylate kinase, required for purine metabolism; localized to the cytoplasm and the mitochondria; lacks cleavable signal sequence
YDR233C	K.QKTQEFSQMACE#K.T	RTN1	2.928	807.867	0.87	ER membrane protein that interacts with exocyst subunit Sec6p and with Yip3p; also interacts with Sbh1p; null mutant has an altered (mostly cisternal) ER morphology; member of the RTNLA (reticulon-like A) subfamily
YDR233C	K.S]CNC@DLLLWR.N	RTN1	3.722	668.811	0.34	ER membrane protein that interacts with exocyst subunit Sec6p and with Yip3p; also interacts with Sbh1p; null mutant has an altered (mostly cisternal) ER morphology; member of the RTNLA (reticulon-like A) subfamily
YDR233C	K.TQEFSQMAC@EK.T	RTN1	2.692	687.786	-0.63	ER membrane protein that interacts with exocyst subunit Sec6p and with Yip3p; also interacts with Sbh1p; null mutant has an altered (mostly cisternal) ER morphology; member of the RTNLA (reticulon-like A) subfamily
YDR234W	K.AYLVSC@TNSR.L	LYS4	2.786	585.783	0.85	Homoaconitase, catalyzes the conversion of homocitrate to homoisocitrate, which is a step in the lysine biosynthesis pathway
YDR234W	K.MAQVC@MENYDAEFR.T	LYS4	3.752	898.358	0.32	Homoaconitase, catalyzes the conversion of homocitrate to homoisocitrate, which is a step in the lysine biosynthesis pathway
YDR234W	R.LSDLQSAADVVC@PTGDLNK.V	LYS4	2.421	1001.99	-0.24	Homoaconitase, catalyzes the conversion of homocitrate to homoisocitrate, which is a step in the lysine biosynthesis pathway
YDR238C	K.GTNMGILTPSESLGEDDC@R.F	SEC26	3.004	1034.45	1.17	Essential beta-coat protein of the COPI coatomer, involved in ER-to-Golgi protein trafficking and maintenance of normal ER morphology; shares 43% sequence identity with mammalian beta-coat protein (beta-COP)
YDR238C	K.GTNMGILTPSESLGEDDC@RFLSC@NLYAK.S	SEC26	2.999	1055.48	-0.32	Essential beta-coat protein of the COPI coatomer, involved in ER-to-Golgi protein trafficking and maintenance of normal ER morphology; shares 43% sequence identity with mammalian beta-coat protein (beta-COP)
YDR238C	K.SSFGEDALANLC@IEK.D	SEC26	4.63	827.394	1.08	Essential beta-coat protein of the COPI coatomer, involved in ER-to-Golgi protein trafficking and maintenance of normal ER morphology; shares 43% sequence identity with mammalian beta-coat protein (beta-COP)
YDR238C	R.FLSC@NLYAK.S	SEC26	2.877	558.281	-0.65	Essential beta-coat protein of the COPI coatomer, involved in ER-to-Golgi protein trafficking and maintenance of normal ER morphology; shares 43% sequence identity with mammalian beta-coat protein (beta-COP)
YDR257C	K.C@NANLTYDSNCLK[.M	SET7	3.473	786.843	-0.05	Nuclear protein that contains a SET-domain, which have been shown to mediate methyltransferase activity in other proteins
YDR266C	K.SC@LIC@R.T	YDR266C	2.253	404.694	-0.09	Protein of unknown function that may interact with ribosomes, based on co-purification experiments;green fluorescent protein (GFP)-fusion protein localizes to the cytoplasm; contains a RING finger domain
YDR266C	K.TC@HICGFR[.Q	YDR266C	1.997	350.825	-0.44	Protein of unknown function that may interact with ribosomes, based on co-purification experiments;green fluorescent protein (GFP)-fusion protein localizes to the cytoplasm; contains a RING finger domain
YDR267C	R.LCSGSDD#STVR.V	CIA1	1.885	598.764	-0.31	Essential protein involved in assembly of cytosolic and nuclear iron-sulfur proteins
YDR272W	K.ALDELEQFC@SK.H	GLO2	3.253	670.313	-0.31	Cytoplasmic glyoxalase II, catalyzes the hydrolysis of S-D-lactoylglutathione into glutathione and D-lactate
YDR272W	K.DPTTDERC@IFTGDTLFTAGCGR[.F	GLO2	3.852	830.704	-1.56	Cytoplasmic glyoxalase II, catalyzes the hydrolysis of S-D-lactoylglutathione into glutathione and D-lactate
YDR272W	R.C]IFTGDTLFTAGCGR[.F	GLO2	3.059	838.381	-0.81	Cytoplasmic glyoxalase II, catalyzes the hydrolysis of S-D-lactoylglutathione into glutathione and D-lactate
YDR272W	R.DSIC@YYVKDPTTDER.C	GLO2	2.976	621.28	-0.85	Cytoplasmic glyoxalase II, catalyzes the hydrolysis of S-D-lactoylglutathione into glutathione and D-lactate
YDR272W	R.WESGGVNYCY#LLSDSK.N	GLO2	4.232	939.422	-0.43	Cytoplasmic glyoxalase II, catalyzes the hydrolysis of S-D-lactoylglutathione into glutathione and D-lactate
YDR295C	R.NAPVNNCE#IDYIK.L	HDA2	2.827	775.37	1	Subunit of a possibly tetrameric trichostatin A-sensitive class II histone deacetylase complex containing an Hda1p homodimer and an Hda2p-Hda3p heterodimer; involved in telomere maintenance
YDR298C	R.LGC@FEK.I	ATP5	1.973	377.183	-0.36	Subunit 5 of the stator stalk of mitochondrial F1F0 ATP synthase, which is an evolutionarily conserved enzyme complex required for ATP synthesis; homologous to bovine subunit OSCP (oligomycin sensitivity-conferring protein); phosphorylated
YDR300C	R.C]NYTSSELTK.I	PRO1	3.215	601.771	-0.84	Gamma-glutamyl kinase, catalyzes the first step in proline biosynthesis
YDR304C	K.NTNGSQFFITTVPC@PWLDGK.H	CPR5	4.216	1141.55	-0.08	Peptidyl-prolyl cis-trans isomerase (cyclophilin) of the endoplasmic reticulum, catalyzes the cis-trans isomerization of peptide bonds N-terminal to proline residues; transcriptionally induced in response to unfolded proteins in the ER
YDR313C	R.I]FCSSC@TENFVNYNK.K	PIB1	3.506	941.909	0.65	RING-type ubiquitin ligase of the endosomal and vacuolar membranes, binds phosphatidylinositol(3)-phosphate; contains a FYVE finger domain
YDR320C	R.C@QDFINPPPVKK.S	SWA2	2.319	481.587	-0.47	Auxilin-like protein involved in vesicular transport; clathrin-binding protein required for uncoating of clathrin-coated vesicles
YDR321W	K.VC@DIEYEQLC@NVDSK.D	ASP1	4.229	936.409	-2.62	Cytosolic L-asparaginase, involved in asparagine catabolism
YDR321W	K.VC@DIEYEQLC@NVDSKDINEDILYK.I	ASP1	3.032	992.46	-0.04	Cytosolic L-asparaginase, involved in asparagine catabolism
YDR323C	R.TLNNNIGAINCR[.K	PEP7	2.575	680.343	-0.68	Multivalent adaptor protein that facilitates vesicle-mediated vacuolar protein sorting by ensuring high-fidelity vesicle docking and fusion, which are essential for targeting of vesicles to the endosome; required for vacuole inheritance
YDR335W	R.IVIDC@VGQGNANPNSAK.S	MSN5	3.154	878.937	1.62	Karyopherin involved in nuclear import and export; shown to be responsible for nuclear import of replication protein A and for export of several proteins including Swi6p, Far1p, and Pho4p; cargo dissociation involves binding to RanGTP
YDR335W	R.YAC@GIELNR.M	MSN5	2.628	548.266	-0.03	Karyopherin involved in nuclear import and export; shown to be responsible for nuclear import of replication protein A and for export of several proteins including Swi6p, Far1p, and Pho4p; cargo dissociation involves binding to RanGTP
YDR339C	K.GTYADDC@LVHR.V	FCF1	2.904	653.796	-0.04	Essential nucleolar protein that is a component of the SSU (small subunit) processome involved in the pre-rRNA processing steps of 40S ribosomal subunit biogenesis; contains a PINc domain; copurifies with Faf1p
YDR341C	K.FPCGD#FLEK.V	YDR341C	2.33	556.758	0.36	Arginyl-tRNA synthetase, proposed to be cytoplasmic but the authentic, non-tagged protein is detected in highly purified mitochondria in high-throughput studies
YDR346C	K.IC@AVVEGPLNNLVER.I	SVF1	3.132	841.948	-0.3	Protein with a potential role in cell survival pathways, required for the diauxic growth shift; expression in mammalian cells increases survival under conditions inducing apoptosis
YDR347W	R.TPPEEC@PR.L	MRP1	1.702	493.224	0.19	Mitochondrial ribosomal protein of the small subunit; MRP1 exhibits genetic interactions with PET122, encoding a COX3-specific translational activator, and with PET123, encoding a small subunit mitochondrial ribosomal protein
YDR353W	K.GISAC@AVC@DGAVPIFR.N	TRR1	4.911	846.913	-0.05	Cytoplasmic thioredoxin reductase, key regulatory enzyme that determines the redox state of the thioredoxin system, which acts as a disulfide reductase system and protects cells against both oxidative and reductive stress
YDR353W	K.YRQAITSAGSGC@MAALDAEK.Y	TRR1	5.875	705.998	-0.46	Cytoplasmic thioredoxin reductase, key regulatory enzyme that determines the redox state of the thioredoxin system, which acts as a disulfide reductase system and protects cells against both oxidative and reductive stress
YDR353W	R.NKPLAVIGGGDSAC@EEAQFLTK.Y	TRR1	6.531	769.055	0.58	Cytoplasmic thioredoxin reductase, key regulatory enzyme that determines the redox state of the thioredoxin system, which acts as a disulfide reductase system and protects cells against both oxidative and reductive stress
YDR353W	R.QAITSAGSGC@MAALDAEK.Y	TRR1	5.129	898.911	-0.35	Cytoplasmic thioredoxin reductase, key regulatory enzyme that determines the redox state of the thioredoxin system, which acts as a disulfide reductase system and protects cells against both oxidative and reductive stress
YDR365C	K.AIYDNC@DGTEYESTANMFDLR.Y	ESF1	4.039	834.344	-2.22	Nucleolar protein involved in pre-rRNA processing; depletion causes severely decreased 18S rRNA levels
YDR368W	R.VTDGNVLC@IPTLEDGTVDIDTK.E	YPR1	2.982	1188.09	-0.8	2-methylbutyraldehyde reductase, may be involved in isoleucine catabolism
YDR373W	K.LSKDDLTC@LK.Q	FRQ1	3.132	596.816	0.24	N-myristoylated calcium-binding protein that may have a role in intracellular signaling through its regulation of the phosphatidylinositol 4-kinase Pik1p; member of the recoverin/frequenin branch of the EF-hand superfamily
YDR376W	K.INRDDFGAINSLSLCNNR[.L	ARH1	3.179	693.673	0.1	Oxidoreductase of the mitochondrial inner membrane, involved in cytoplasmic and mitochondrial iron homeostasis and required for activity of Fe-S cluster-containing enzymes; one of the few mitochondrial proteins essential for viability
YDR380W	K.C]MVEAAALKR.N	ARO10	2.454	383.535	0.01	Phenylpyruvate decarboxylase, catalyzes decarboxylation of phenylpyruvate to phenylacetaldehyde, which is the first specific step in the Ehrlich pathway
YDR380W	K.YTNSTLIQC@PSK.L	ARO10	3.892	706.347	-0.81	Phenylpyruvate decarboxylase, catalyzes decarboxylation of phenylpyruvate to phenylacetaldehyde, which is the first specific step in the Ehrlich pathway
YDR384C	R.DLLNALDRGDGEEGNC@AK.Y	ATO3	2.922	649.635	0.98	Plasma membrane protein, regulation pattern suggests a possible role in export of ammonia from the cell; phosphorylated in mitochondria; member of the TC 9.B.33 YaaH family of putative transporters
YDR385W	K.IQEPVFLVEIQC@PEQAVGGIYSVLNK.K	EFT2	4	977.516	-0.02	Elongation factor 2 (EF-2), also encoded by EFT1; catalyzes ribosomal translocation during protein synthesis; contains diphthamide, the unique posttranslationally modified histidine residue specifically ADP-ribosylated by diphtheria toxin
YDR385W	K.IWC@FGPDGNGPNLVIDQTK.A	EFT2	6.012	1066.02	0.07	Elongation factor 2 (EF-2), also encoded by EFT1; catalyzes ribosomal translocation during protein synthesis; contains diphthamide, the unique posttranslationally modified histidine residue specifically ADP-ribosylated by diphtheria toxin
YDR385W	K.NC@DPKADLMLYVSK.M	EFT2	2.863	557.269	0.85	Elongation factor 2 (EF-2), also encoded by EFT1; catalyzes ribosomal translocation during protein synthesis; contains diphthamide, the unique posttranslationally modified histidine residue specifically ADP-ribosylated by diphtheria toxin
YDR385W	R.AEQLYEGPADDANC@IAIK.N	EFT2	4.84	989.466	0.76	Elongation factor 2 (EF-2), also encoded by EFT1; catalyzes ribosomal translocation during protein synthesis; contains diphthamide, the unique posttranslationally modified histidine residue specifically ADP-ribosylated by diphtheria toxin
YDR385W	R.AEQLYEGPADDANC@IAIKNC@DPK.A	EFT2	3.352	864.728	-0.05	Elongation factor 2 (EF-2), also encoded by EFT1; catalyzes ribosomal translocation during protein synthesis; contains diphthamide, the unique posttranslationally modified histidine residue specifically ADP-ribosylated by diphtheria toxin
YDR385W	R.AEQLYEGPADDANC@IAIKNC@DPKADLMLYVSK.M	EFT2	3.678	907.93	0.06	Elongation factor 2 (EF-2), also encoded by EFT1; catalyzes ribosomal translocation during protein synthesis; contains diphthamide, the unique posttranslationally modified histidine residue specifically ADP-ribosylated by diphtheria toxin
YDR385W	R.AEQLYEGPADDANCIAIK.N	EFT2	4.385	960.954	-0.24	Elongation factor 2 (EF-2), also encoded by EFT1; catalyzes ribosomal translocation during protein synthesis; contains diphthamide, the unique posttranslationally modified histidine residue specifically ADP-ribosylated by diphtheria toxin
YDR385W	R.FVEPIDDC@PAGNIIGLVGIDQFLLK.T	EFT2	5.348	915.151	0.27	Elongation factor 2 (EF-2), also encoded by EFT1; catalyzes ribosomal translocation during protein synthesis; contains diphthamide, the unique posttranslationally modified histidine residue specifically ADP-ribosylated by diphtheria toxin
YDR385W	R.KIWC@FGPDGNGPNLVIDQTK.A	EFT2	4.808	1130.06	-0.54	Elongation factor 2 (EF-2), also encoded by EFT1; catalyzes ribosomal translocation during protein synthesis; contains diphthamide, the unique posttranslationally modified histidine residue specifically ADP-ribosylated by diphtheria toxin
YDR388W	K.IVTPC@QELLK.I	RVS167	2.464	600.837	0.55	Actin-associated protein, subunit of a complex (Rvs161p-Rvs167p) involved in regulation of actin cytoskeleton, endocytosis, and viability following starvation or osmotic stress; homolog of mammalian amphiphysin
YDR391C	K.GHMVC@TLNK.T	YDR391C	2.271	530.257	-0.99	Putative protein of unknown function, possibly involved in zinc homeostasis; Bdf1p-dependent transcription induced by salt stress; green fluorescent protein (GFP)-fusion protein localizes to both the cytoplasm and the nucleus
YDR399W	K.QYISYNNVHQLC@QVSAER.I	HPT1	2.765	737.02	0.51	Dimeric hypoxanthine-guanine phosphoribosyltransferase, catalyzes the formation of both inosine monophosphate and guanosine monophosphate; mutations in the human homolog HPRT1 can cause Lesch-Nyhan syndrome and Kelley-Seegmiller syndrome
YDR399W	R.TQWIDYE#QCKLDLVGK.N	HPT1	2.667	998.497	0.75	Dimeric hypoxanthine-guanine phosphoribosyltransferase, catalyzes the formation of both inosine monophosphate and guanosine monophosphate; mutations in the human homolog HPRT1 can cause Lesch-Nyhan syndrome and Kelley-Seegmiller syndrome
YDR400W	R.MDISC@IDDVFNENSGK.I	URH1	3.275	930.392	-0.92	Uridine nucleosidase (uridine-cytidine N-ribohydrolase), cleaves N-glycosidic bonds in nucleosides; involved in the pyrimidine salvage and nicotinamide riboside salvage pathways
YDR404C	K.LLEEVEGSC@TGK.F	RPB7	3.824	661.319	0.64	RNA polymerase II subunit B16; forms two subunit dissociable complex with Rpb4p
YDR405W	R.LNC@LGSDANKPGTAFDGVVGPYER.V	MRP20	4.204	846.408	-0.15	Mitochondrial ribosomal protein of the large subunit
YDR406W	K.TTLLDC@LAER.V	PDR15	3.077	596.306	0	Plasma membrane ATP binding cassette (ABC) transporter, multidrug transporter and general stress response factor implicated in cellular detoxification; regulated by Pdr1p, Pdr3p and Pdr8p; promoter contains a PDR responsive element
YDR407C	K.IITEPTSTC@R.R	TRS120	2.113	589.298	0.7	One of 10 subunits of the transport protein particle (TRAPP) complex of the cis-Golgi which mediates vesicle docking and fusion; involved in endoplasmic reticulum (ER) to Golgi membrane traffic
YDR418W	K.EILGTAQSVGC@R.V	RPL12B	3.73	645.827	0.47	Protein component of the large (60S) ribosomal subunit, nearly identical to Rpl12Ap; rpl12a rpl12b double mutant exhibits slow growth and slow translation; has similarity to E. coli L11 and rat L12 ribosomal proteins
YDR418W	K.EILGTAQSVGCR.V	RPL12B	2.894	617.316	-0.28	Protein component of the large (60S) ribosomal subunit, nearly identical to Rpl12Ap; rpl12a rpl12b double mutant exhibits slow growth and slow translation; has similarity to E. coli L11 and rat L12 ribosomal proteins
YDR422C	R.MQLLASHDPSTDCDGR[.M	SIP1	2.724	601.599	0.79	Alternate beta-subunit of the Snf1p kinase complex, may confer substrate specificity; vacuolar protein containing KIS (Kinase-Interacting Sequence) and ASC (Association with Snf1 kinase Complex) domains involved in protein interactions
YDR423C	K.IDTSAC@QC@EIDQK.Y	CAD1	2.957	784.34	-0.29	AP-1-like bZIP transcriptional activator involved in stress responses, iron metabolism, and pleiotropic drug resistance; controls a set of genes involved in stabilizing proteins; binds consensus sequence TTACTAA; 5' UTR contains uORFs
YDR429C	R.ERDDMC@TLK.I	TIF35	2.361	584.26	0.15	Subunit of the core complex of translation initiation factor 3(eIF3), which is essential for translation
YDR432W	K.NLPEGC@SWQDLK.D	NPL3	3.012	723.838	0.86	RNA-binding protein that carries poly(A)+ mRNA from the nucleus into the cytoplasm; dissociation from mRNAs is promoted by Mtr10p; phosphorylated by Sky1p in the cytoplasm
YDR435C	K.LAAC@DLNDITETTR.L	PPM1	4.069	796.882	-1.16	Carboxyl methyltransferase, methylates the C terminus of the protein phosphatase 2A catalytic subunit (Pph21p or Pph22p), which is important for complex formation with regulatory subunits
YDR436W	K.FGFDLVC@R.A	PPZ2	2.675	507.247	-0.16	Serine/threonine protein phosphatase Z, isoform of Ppz1p; involved in regulation of potassium transport, which affects osmotic stability, cell cycle progression, and halotolerance
YDR447C	K.RLCD#EIATIQSK.R	RPS17B	3.447	478.586	0.58	Ribosomal protein 51 (rp51) of the small (40s) subunit; nearly identical to Rps17Ap and has similarity to rat S17 ribosomal protein
YDR450W	R.RYSNLVC@K.K	RPS18A	2.415	520.271	-0.69	Protein component of the small (40S) ribosomal subunit; nearly identical to Rps18Bp and has similarity to E. coli S13 and rat S18 ribosomal proteins
YDR450W	R.YSNLVC@K.K	RPS18A	2.731	442.221	0.43	Protein component of the small (40S) ribosomal subunit; nearly identical to Rps18Bp and has similarity to E. coli S13 and rat S18 ribosomal proteins
YDR450W	R.YSNLVC@KK.A	RPS18A	2.513	506.268	-0.02	Protein component of the small (40S) ribosomal subunit; nearly identical to Rps18Bp and has similarity to E. coli S13 and rat S18 ribosomal proteins
YDR454C	K.TC@ILDIDMQGVK.S	GUK1	3.093	704.844	0.2	Guanylate kinase, converts GMP to GDP; required for growth and mannose outer chain elongation of cell wall N-linked glycoproteins
YDR458C	K.N]AQHECGEGENLFESGETETK.L	HEH2	3.525	789.333	0.69	Inner nuclear membrane (INM) protein; contains helix-extension-helix (HEH) motif, nuclear localization signal sequence; targeting to the INM requires the Srp1p-Kap95p karyopherins and the Ran cycle
YDR458C	K.NAQHECGE#GENLFESGETETK.L	HEH2	3.652	789.333	0.91	Inner nuclear membrane (INM) protein; contains helix-extension-helix (HEH) motif, nuclear localization signal sequence; targeting to the INM requires the Srp1p-Kap95p karyopherins and the Ran cycle
YDR477W	K.TSC@GSPNYAAPEVISGK.L	SNF1	3.306	869.409	-0.03	AMP-activated serine/threonine protein kinase found in a complex containing Snf4p and members of the Sip1p/Sip2p/Gal83p family; required for transcription of glucose-repressed genes, thermotolerance, sporulation, and peroxisome biogenesis
YDR478W	K.C]IQVNC@LNC@EK.S	SNM1	2.608	719.318	0.4	Subunit of RNase MRP, which cleaves pre-rRNA and has a role in cell cycle-regulated degradation of daughter cell-specific mRNAs; binds to the NME1 RNA subunit of RNase MRP
YDR481C	K.SYNGAIGVDPHHRPCGTVLE#AAK.L	PHO8	3.515	817.072	-0.58	Repressible alkaline phosphatase, a glycoprotein localized to the vacuole; regulated by levels of inorganic phosphate and by a system consisting of Pho4p, Pho9p, Pho80p, Pho81p and Pho85p; dephosphorylates phosphotyrosyl peptides
YDR483W	K.A]CYVTLVR.N	KRE2	1.874	491.263	0.09	Alpha1,2-mannosyltransferase of the Golgi involved in protein mannosylation
YDR487C	K.SFLKPGHIC@PLR.A	RIB3	2.772	475.599	-0.38	3,4-dihydroxy-2-butanone-4-phosphate synthase (DHBP synthase), required for riboflavin biosynthesis from ribulose-5-phosphate, also has an unrelated function in mitochondrial respiration
YDR487C	R.GHTEAGVDLC@K.L	RIB3	2.573	396.189	0.07	3,4-dihydroxy-2-butanone-4-phosphate synthase (DHBP synthase), required for riboflavin biosynthesis from ribulose-5-phosphate, also has an unrelated function in mitochondrial respiration
YDR487C	R.LNDC@QAFGK.K	RIB3	2.917	526.745	0.03	3,4-dihydroxy-2-butanone-4-phosphate synthase (DHBP synthase), required for riboflavin biosynthesis from ribulose-5-phosphate, also has an unrelated function in mitochondrial respiration
YDR487C	R.RGHTEAGVDLC@K.L	RIB3	2.173	671.83	-0.38	3,4-dihydroxy-2-butanone-4-phosphate synthase (DHBP synthase), required for riboflavin biosynthesis from ribulose-5-phosphate, also has an unrelated function in mitochondrial respiration
YDR487C	R.RGHTEAGVDLCK#.L	RIB3	2.894	671.83	-0.54	3,4-dihydroxy-2-butanone-4-phosphate synthase (DHBP synthase), required for riboflavin biosynthesis from ribulose-5-phosphate, also has an unrelated function in mitochondrial respiration
YDR500C	K.TC@SSC@GYPSAK.T	RPL37B	2.984	609.25	-0.44	Protein component of the large (60S) ribosomal subunit, has similarity to Rpl37Ap and to rat L37 ribosomal protein
YDR502C	K.SLVAAGLC@K.R	SAM2	2.939	459.757	-0.17	S-adenosylmethionine synthetase, catalyzes transfer of the adenosyl group of ATP to the sulfur atom of methionine; one of two differentially regulated isozymes (Sam1p and Sam2p)
YDR502C	K.TC@NVLVAIEQQSPDIAQGLHYEK.S	SAM2	4.073	871.771	0.16	S-adenosylmethionine synthetase, catalyzes transfer of the adenosyl group of ATP to the sulfur atom of methionine; one of two differentially regulated isozymes (Sam1p and Sam2p)
YDR505C	R.S]CNMNYVNDPESNNGIVSNNGGNK.N	PSP1	3.811	872.035	-0.04	Asn and gln rich protein of unknown function; high-copy suppressor of POL1 (DNA polymerase alpha) and partial suppressor of CDC2 (polymerase delta) and CDC6 (pre-RC loading factor) mutations; overexpression results in growth inhibition
YDR513W	K.TYC@PYC@K.A	GRX2	1.405	496.204	-0.03	Cytoplasmic glutaredoxin, thioltransferase, glutathione-dependent disulfide oxidoreductase involved in maintaining redox state of target proteins, also exhibits glutathione peroxidase activity, expression induced in response to stress
YDR516C	K.TPFQLC@SEVLSR.I	EMI2	3.411	718.863	-0.38	Non-essential protein of unknown function required for transcriptional induction of the early meiotic-specific transcription factor IME1; required for sporulation; expression is regulated by glucose-repression transcription factors Mig1/2p
YDR516C	R.VC@SVTLNGDGTFDMQQLK.S	EMI2	3.346	1014.97	1.3	Non-essential protein of unknown function required for transcriptional induction of the early meiotic-specific transcription factor IME1; required for sporulation; expression is regulated by glucose-repression transcription factors Mig1/2p
YDR517W	R.L]GCNVGYGFLHR.I	GRH1	3.685	464.9	0.27	Acetylated, cis-golgi localized protein involved in ER to Golgi transport; homolog of human GRASP65; forms a complex with the coiled-coil protein Bug1p; mutants are compromised for the fusion of ER-derived vesicles with Golgi membranes
YDR519W	K.GWDQGVAGMC@VGEK.R	FPR2	4.749	755.326	-0.37	Membrane-bound peptidyl-prolyl cis-trans isomerase (PPIase), binds to the drugs FK506 and rapamycin; expression pattern suggests possible involvement in ER protein trafficking
YDR519W	K.RIPVEDC@LIK.A	FPR2	2.9	621.847	-0.11	Membrane-bound peptidyl-prolyl cis-trans isomerase (PPIase), binds to the drugs FK506 and rapamycin; expression pattern suggests possible involvement in ER protein trafficking
YDR519W	R.IPVEDC@LIK.A	FPR2	2.343	543.797	0.85	Membrane-bound peptidyl-prolyl cis-trans isomerase (PPIase), binds to the drugs FK506 and rapamycin; expression pattern suggests possible involvement in ER protein trafficking
YDR539W	K.SQGHPC@PLYTVK.A	YDR539W	2.736	693.845	-0.27	Putative protein of unknown function; green fluorescent protein (GFP)-fusion protein localizes to the cytoplasm; YDR539W is not an essential gene; homolog of E. coli UbiD
YEL002C	K.FFENEGNILC@MSSPGAVPNTIR.L	WBP1	2.938	823.723	0.32	Beta subunit of the oligosaccharyl transferase (OST) glycoprotein complex; required for N-linked glycosylation of proteins in the endoplasmic reticulum
YEL013W	K.C]QATLALR.N	VAC8	2.477	466.752	-0.91	Phosphorylated vacuolar membrane protein that interacts with Atg13p, required for the cytoplasm-to-vacuole targeting (Cvt) pathway; interacts with Nvj1p to form nucleus-vacuole junctions
YEL020W-A	R.C@FTDC@VNDFTTSK.L	TIM9	4.24	797.829	-0.12	Mitochondrial intermembrane space protein, forms a complex with Mrs11p/Tim10p that mediates import and insertion of a subset of polytopic inner membrane proteins; may prevent aggregation of incoming proteins in a chaperone-like manner
YEL022W	K.E#CINLSTAMR.K	GEA2	2.479	597.783	-0.89	Guanine nucleotide exchange factor for ADP ribosylation factors (ARFs), involved in vesicular transport between the Golgi and ER, Golgi organization, and actin cytoskeleton organization; similar to but not functionally redundant with Gea1p
YEL026W	R.A]CGVSRPVIAASITTNDASAIK.T	SNU13	3.909	734.723	-0.12	RNA binding protein, part of U3 snoRNP involved in rRNA processing, part of U4/U6-U5 tri-snRNP involved in mRNA splicing, similar to human 15.5K protein
YEL031W	K.DMGYQTLMC@GDGTNDVGALK.Q	SPF1	3.384	1089.46	-0.39	P-type ATPase, ion transporter of the ER membrane involved in ER function and Ca2+ homeostasis; required for regulating Hmg2p degradation; confers sensitivity to a killer toxin (SMKT) produced by Pichia farinosa KK1
YEL031W	K.DMGYQTLMCGDGTND#VGALK.Q	SPF1	3.582	1081.47	2.95	P-type ATPase, ion transporter of the ER membrane involved in ER function and Ca2+ homeostasis; required for regulating Hmg2p degradation; confers sensitivity to a killer toxin (SMKT) produced by Pichia farinosa KK1
YEL031W	K.LGDASC@AAPFTSK.L	SPF1	3.763	662.814	0.1	P-type ATPase, ion transporter of the ER membrane involved in ER function and Ca2+ homeostasis; required for regulating Hmg2p degradation; confers sensitivity to a killer toxin (SMKT) produced by Pichia farinosa KK1
YEL031W	R.IDVC@C@FDK.T	SPF1	2.177	528.728	-0.97	P-type ATPase, ion transporter of the ER membrane involved in ER function and Ca2+ homeostasis; required for regulating Hmg2p degradation; confers sensitivity to a killer toxin (SMKT) produced by Pichia farinosa KK1
YEL031W	R.IDVC@CFDK#.T	SPF1	2.125	528.727	-1.15	P-type ATPase, ion transporter of the ER membrane involved in ER function and Ca2+ homeostasis; required for regulating Hmg2p degradation; confers sensitivity to a killer toxin (SMKT) produced by Pichia farinosa KK1
YEL034W	K.SRPCK#IVDMSTSK.T	HYP2	2.731	508.922	0.01	Translation initiation factor eIF-5A, promotes formation of the first peptide bond; similar to and functionally redundant with Anb1p; possible role in translation elongation; undergoes an essential hypusination modification
YEL037C	K.LAQSISCE#ESQIK.L	RAD23	3.6	746.869	0.15	Protein with ubiquitin-like N terminus, recognizes and binds damaged DNA (with Rad4p) during nucleotide excision repair; regulates Rad4p levels, subunit of Nuclear Excision Repair Factor 2 (NEF2); homolog of human HR23A and HR23B proteins
YEL037C	R.LC@ELGFER.D	RAD23	2.464	512.25	0.31	Protein with ubiquitin-like N terminus, recognizes and binds damaged DNA (with Rad4p) during nucleotide excision repair; regulates Rad4p levels, subunit of Nuclear Excision Repair Factor 2 (NEF2); homolog of human HR23A and HR23B proteins
YEL040W	R.YSFSHDSC@MPVPIC@K.S	UTR2	3.263	914.398	1.7	Cell wall protein that functions in the transfer of chitin to beta(1-6)glucan; putative chitin transglycosidase; glycosylphosphatidylinositol (GPI)-anchored protein localized to the bud neck; has a role in cell wall maintenance
YEL040W	R.YSFSHDSC@MPVPICK#.S	UTR2	3.227	615.265	0.16	Cell wall protein that functions in the transfer of chitin to beta(1-6)glucan; putative chitin transglycosidase; glycosylphosphatidylinositol (GPI)-anchored protein localized to the bud neck; has a role in cell wall maintenance
YEL042W	K.DAQC@QSPPC@SFNGVHQPSLVR.T	GDA1	3.519	795.367	-0.01	Guanosine diphosphatase located in the Golgi, involved in the transport of GDP-mannose into the Golgi lumen by converting GDP to GMP after mannose is transferred its substrate
YEL042W	R.FLTDEILNKDAQC@QSPPCSFNGVHQPSLVR[.T	GDA1	3.59	865.171	-0.21	Guanosine diphosphatase located in the Golgi, involved in the transport of GDP-mannose into the Golgi lumen by converting GDP to GMP after mannose is transferred its substrate
YEL044W	K.KYC@DVTGLK.G	IES6	2.386	542.279	0.08	Protein that associates with the INO80 chromatin remodeling complex under low-salt conditions
YEL046C	K.AWC@MENGLK.L	GLY1	2.097	562.747	-0.26	Threonine aldolase, catalyzes the cleavage of L-allo-threonine and L-threonine to glycine; involved in glycine biosynthesis
YEL052W	K.C]LTPLQEYDR.L	AFG1	2.437	647.808	-0.36	Conserved protein that may act as a chaperone in the degradation of misfolded or unassembled cytochrome c oxidase subunits; localized to matrix face of the mitochondrial inner membrane; member of the AAA family but lacks a protease domain
YEL058W	-.M@KVDY#E#QLCK.L	PCM1	2.888	709.323	-0.64	Essential N-acetylglucosamine-phosphate mutase; converts GlcNAc-6-P to GlcNAc-1-P, which is a precursor for the biosynthesis of chitin and for the formation of N-glycosylated mannoproteins and glycosylphosphatidylinositol anchors
YEL058W	-.MKVDYEQLC@K.L	PCM1	3.518	438.546	-0.29	Essential N-acetylglucosamine-phosphate mutase; converts GlcNAc-6-P to GlcNAc-1-P, which is a precursor for the biosynthesis of chitin and for the formation of N-glycosylated mannoproteins and glycosylphosphatidylinositol anchors
YEL058W	K.LGQFC@DEVVEHVK.A	PCM1	3.384	520.589	0.39	Essential N-acetylglucosamine-phosphate mutase; converts GlcNAc-6-P to GlcNAc-1-P, which is a precursor for the biosynthesis of chitin and for the formation of N-glycosylated mannoproteins and glycosylphosphatidylinositol anchors
YEL058W	K.LYDDTC@R.T	PCM1	2.222	471.702	-0.92	Essential N-acetylglucosamine-phosphate mutase; converts GlcNAc-6-P to GlcNAc-1-P, which is a precursor for the biosynthesis of chitin and for the formation of N-glycosylated mannoproteins and glycosylphosphatidylinositol anchors
YEL058W	K.NTLHC@PVSC@TK.T	PCM1	3.105	658.807	-1.28	Essential N-acetylglucosamine-phosphate mutase; converts GlcNAc-6-P to GlcNAc-1-P, which is a precursor for the biosynthesis of chitin and for the formation of N-glycosylated mannoproteins and glycosylphosphatidylinositol anchors
YEL071W	K.SVPTAC@NSYGGMYK.Y	DLD3	2.712	775.834	-0.48	D-lactate dehydrogenase, part of the retrograde regulon which consists of genes whose expression is stimulated by damage to mitochondria and reduced in cells grown with glutamate as the sole nitrogen source, located in the cytoplasm
YEL071W	R.NNC@QVGGVVSTNAGGLNFLR.Y	DLD3	4.057	1039.02	1.81	D-lactate dehydrogenase, part of the retrograde regulon which consists of genes whose expression is stimulated by damage to mitochondria and reduced in cells grown with glutamate as the sole nitrogen source, located in the cytoplasm
YER006W	K.ILDSPGIC@FPSENK.K	NUG1	4.376	788.887	-0.33	GTPase that associates with nuclear 60S pre-ribosomes, required for export of 60S ribosomal subunits from the nucleus
YER007C-A	K.F]VLSGANIMCPGLTSAGADLPPAPGYEK.G	TMA20	2.672	950.466	-0.41	Protein of unknown function that associates with ribosomes and has a putative RNA binding domain; interacts with Tma22p; null mutant exhibits translation defects; has homology to human oncogene MCT-1
YER007C-A	K.FVLSGANIMC@PGLTSAGADLPPAPGYEK.G	TMA20	4.604	1425.2	1.15	Protein of unknown function that associates with ribosomes and has a putative RNA binding domain; interacts with Tma22p; null mutant exhibits translation defects; has homology to human oncogene MCT-1
YER012W	K.L]CVQELEKR.M	PRE1	2.382	392.214	1.02	Beta 4 subunit of the 20S proteasome; localizes to the nucleus throughout the cell cycle
YER012W	K.LC@VQELEK.R	PRE1	2.661	509.765	-0.06	Beta 4 subunit of the 20S proteasome; localizes to the nucleus throughout the cell cycle
YER014W	R.TGGWIYSC@NTR.D	HEM14	2.635	657.798	0.09	Protoporphyrinogen oxidase, a mitochondrial enzyme that catalyzes the seventh step in the heme biosynthetic pathway, converting protoporphyrinogen IX to protoporphyrin IX
YER019W	K.GC@TTC@DSLLNTWR.A	ISC1	3.695	792.353	2.75	Mitochondrial membrane localized inositol phosphosphingolipid phospholipase C, hydrolyzes complex sphingolipids to produce ceramide; activated by phosphatidylserine, cardiolipin, and phosphatidylglycerol; mediates Na+ and Li+ halotolerance
YER020W	R.TRFNVNLEPEC@ELTQQDLSR.T	GPA2	3.876	817.064	-0.57	Nucleotide binding alpha subunit of the heterotrimeric G protein that interacts with the receptor Gpr1p, has signaling role in response to nutrients; green fluorescent protein (GFP)-fusion protein localizes to the cell periphery
YER023W	K.HQVC@TPGGTTIAGLC@VMEEK.G	PRO3	3.916	735.343	-0.1	Delta 1-pyrroline-5-carboxylate reductase, catalyzes the last step in proline biosynthesis
YER025W	K.C@QEPTC@PEPDC@YR.S	GCD11	3.447	856.329	-0.64	Gamma subunit of the translation initiation factor eIF2, involved in the identification of the start codon; binds GTP when forming the ternary complex with GTP and tRNAi-Met
YER025W	K.C@QEPTC@PEPDCYR.S	GCD11	3.651	827.818	-0.02	Gamma subunit of the translation initiation factor eIF2, involved in the identification of the start codon; binds GTP when forming the ternary complex with GTP and tRNAi-Met
YER025W	K.C@QEPTCPEPDCYR[.S	GCD11	2.506	827.818	0.16	Gamma subunit of the translation initiation factor eIF2, involved in the identification of the start codon; binds GTP when forming the ternary complex with GTP and tRNAi-Met
YER025W	K.C]QRPGC@PGR.Y	GCD11	1.996	363.168	0.31	Gamma subunit of the translation initiation factor eIF2, involved in the identification of the start codon; binds GTP when forming the ternary complex with GTP and tRNAi-Met
YER025W	K.CQEPTC@PEPDC@YR.S	GCD11	2.738	827.818	-0.83	Gamma subunit of the translation initiation factor eIF2, involved in the identification of the start codon; binds GTP when forming the ternary complex with GTP and tRNAi-Met
YER025W	K.IYKC@QEPTC@PEPDC@YR.S	GCD11	3.018	705.969	-0.12	Gamma subunit of the translation initiation factor eIF2, involved in the identification of the start codon; binds GTP when forming the ternary complex with GTP and tRNAi-Met
YER025W	K.VDPTLC@R.A	GCD11	1.918	430.718	-0.33	Gamma subunit of the translation initiation factor eIF2, involved in the identification of the start codon; binds GTP when forming the ternary complex with GTP and tRNAi-Met
YER025W	R.LQLTSPAC@TEINEK.I	GCD11	3.737	802.403	-0.24	Gamma subunit of the translation initiation factor eIF2, involved in the identification of the start codon; binds GTP when forming the ternary complex with GTP and tRNAi-Met
YER036C	R.RYGLLGENGC@GK.S	ARB1	3.054	662.327	-0.77	ATPase of the ATP-binding cassette (ABC) family involved in 40S and 60S ribosome biogenesis, has similarity to Gcn20p; shuttles from nucleus to cytoplasm, physically interacts with Tif6p, Lsg1p
YER036C	R.YGLLGENGC@GK.S	ARB1	3.423	584.277	0.19	ATPase of the ATP-binding cassette (ABC) family involved in 40S and 60S ribosome biogenesis, has similarity to Gcn20p; shuttles from nucleus to cytoplasm, physically interacts with Tif6p, Lsg1p
YER043C	K.FDNLYGC@R.E	SAH1	2.872	522.732	0.12	S-adenosyl-L-homocysteine hydrolase, catabolizes S-adenosyl-L-homocysteine which is formed after donation of the activated methyl group of S-adenosyl-L-methionine (AdoMet) to an acceptor
YER043C	K.G]CAAALR.G	SAH1	2.325	359.687	0.52	S-adenosyl-L-homocysteine hydrolase, catabolizes S-adenosyl-L-homocysteine which is formed after donation of the activated methyl group of S-adenosyl-L-methionine (AdoMet) to an acceptor
YER043C	K.VAVVAGYGDVGKGC@AAALR.G	SAH1	2.717	611.993	0.4	S-adenosyl-L-homocysteine hydrolase, catabolizes S-adenosyl-L-homocysteine which is formed after donation of the activated methyl group of S-adenosyl-L-methionine (AdoMet) to an acceptor
YER049W	K.ELEQEC@PYHSK.D	TPA1	2.915	710.313	-0.87	Protein of unknown function; interacts with Sup45p (eRF1), Sup35p (eRF3) and Pab1p; has a role in translation termination efficiency, mRNA poly(A) tail length and mRNA stability
YER052C	K.HYSKPDGPNNNVAVVC@SAR.S	HOM3	3.338	695.669	-0.6	Aspartate kinase (L-aspartate 4-P-transferase); cytoplasmic enzyme that catalyzes the first step in the common pathway for methionine and threonine biosynthesis; expression regulated by Gcn4p and the general control of amino acid synthesis
YER055C	K.C]DLGITGVDQVR.E	HIS1	3.528	666.833	1.15	ATP phosphoribosyltransferase, a hexameric enzyme, catalyzes the first step in histidine biosynthesis; mutations cause histidine auxotrophy and sensitivity to Cu, Co, and Ni salts; transcription is regulated by general amino acid control
YER055C	R.FVSC@IYNAPEDK.L	HIS1	3.071	721.834	-0.9	ATP phosphoribosyltransferase, a hexameric enzyme, catalyzes the first step in histidine biosynthesis; mutations cause histidine auxotrophy and sensitivity to Cu, Co, and Ni salts; transcription is regulated by general amino acid control
YER055C	R.FVSC@IYNAPEDKLPELLK.V	HIS1	2.13	712.706	0.05	ATP phosphoribosyltransferase, a hexameric enzyme, catalyzes the first step in histidine biosynthesis; mutations cause histidine auxotrophy and sensitivity to Cu, Co, and Ni salts; transcription is regulated by general amino acid control
YER056C-A	K.C]GDCGSALQGISTLRPR.Q	RPL34A	2.446	597.626	-0.6	Protein component of the large (60S) ribosomal subunit, nearly identical to Rpl34Bp and has similarity to rat L34 ribosomal protein
YER057C	R.S]CVAVAALPLGVDMEMEAIAAERD.-	HMF1	2.938	845.402	-0.54	Member of the p14.5 protein family with similarity to Mmf1p, functionally complements Mmf1p function when targeted to mitochondria; heat shock inducible; high-dosage growth inhibitor; forms a homotrimer in vitro
YER062C	K.G]CDIIVK.N	HOR2	2.14	402.718	0.01	One of two redundant DL-glycerol-3-phosphatases (RHR2/GPP1 encodes the other) involved in glycerol biosynthesis; induced in response to hyperosmotic stress and oxidative stress, and during the diauxic transition
YER062C	K.LC@NALNALPK.E	HOR2	2.679	557.308	0.19	One of two redundant DL-glycerol-3-phosphatases (RHR2/GPP1 encodes the other) involved in glycerol biosynthesis; induced in response to hyperosmotic stress and oxidative stress, and during the diauxic transition
YER068W	R.C@IAQVDGTYMDGR.L	MOT2	3.83	743.325	-1.59	Component of the CCR4-NOT complex, which has multiple roles in transcription regulation, mRNA degradation, and post-transcriptional modifications; with Ubc4p, ubiquitylates subunits of the nascent polypeptide-associated complex (NAC)
YER069W	K.IANPGC@YATGSQLTISPLTK.Y	ARG5	2.886	1046.54	-0.41	Protein that is processed in the mitochondrion to yield acetylglutamate kinase and N-acetyl-gamma-glutamyl-phosphate reductase, which catalyze the 2nd and 3rd steps in arginine biosynthesis; enzymes form a complex with Arg2p
YER070W	K.VIAC@AIDNPEAC@EMC@SG.-	RNR1	4.01	948.883	-0.43	One of two large regulatory subunits of ribonucleotide-diphosphate reductase; the RNR complex catalyzes rate-limiting step in dNTP synthesis, regulated by DNA replication and DNA damage checkpoint pathways via localization of small subunits
YER079W	R.TNSGC@SITSGASMIATK.D	YER079W	2.517	851.393	-0.21	Putative protein of unknown function
YER086W	K.IPATIVMPVC@TPSIK.Y	ILV1	3.142	821.949	-0.31	Threonine deaminase, catalyzes the first step in isoleucine biosynthesis; expression is under general amino acid control; ILV1 locus exhibits highly positioned nucleosomes whose organization is independent of known ILV1 regulation
YER086W	R.LGSQVVLYGNDFDEAKAECAK[.L	ILV1	3.683	772.037	-2.72	Threonine deaminase, catalyzes the first step in isoleucine biosynthesis; expression is under general amino acid control; ILV1 locus exhibits highly positioned nucleosomes whose organization is independent of known ILV1 regulation
YER086W	R.NQGVIAC@SAGNHAQGVAFAAK.H	ILV1	2.498	691.009	-0.47	Threonine deaminase, catalyzes the first step in isoleucine biosynthesis; expression is under general amino acid control; ILV1 locus exhibits highly positioned nucleosomes whose organization is independent of known ILV1 regulation
YER087W	K.DGQYSGDVDCK#.Y	YER087W	2.024	622.249	0.45	Protein with similarity to tRNA synthetases; non-tagged protein is detected in purified mitochondria; null mutant displays decreased frequency of mitochondrial genome loss (petite formation), severe growth defect in minimal glycerol media
YER087W	K.VSIC@TGPNNPENSQR.L	YER087W	2.994	836.889	0.03	Protein with similarity to tRNA synthetases; non-tagged protein is detected in purified mitochondria; null mutant displays decreased frequency of mitochondrial genome loss (petite formation), severe growth defect in minimal glycerol media
YER088C	R.C@TITSDTSSSAATMNR.T	DOT6	3.194	859.869	-0.92	Protein of unknown function, involved in telomeric gene silencing and filamentation
YER088C	R.C]TITSDTSSSAATMNR.T	DOT6	4.727	851.871	-1.32	Protein of unknown function, involved in telomeric gene silencing and filamentation
YER089C	K.C]NDEQVFAITTK.K	PTC2	4.301	713.337	-1.18	Type 2C protein phosphatase; dephosphorylates Hog1p to limit maximal osmostress induced kinase activity; dephosphorylates Ire1p to downregulate the unfolded protein response; dephosphorylates Cdc28p; role in DNA checkpoint inactivation
YER089C	K.SQNLLVC@GNAGDSR.T	PTC2	4.569	745.854	-0.09	Type 2C protein phosphatase; dephosphorylates Hog1p to limit maximal osmostress induced kinase activity; dephosphorylates Ire1p to downregulate the unfolded protein response; dephosphorylates Cdc28p; role in DNA checkpoint inactivation
YER090W	K.LSGGAIGYISYDC@VR.Y	TRP2	2.993	815.898	-0.29	Anthranilate synthase, catalyzes the initial step of tryptophan biosynthesis, forms multifunctional hetero-oligomeric anthranilate synthase:indole-3-glycerol phosphate synthase enzyme complex with Trp3p
YER090W	R.IC@DPLTTSVDK.L	TRP2	3.167	624.81	-1.75	Anthranilate synthase, catalyzes the initial step of tryptophan biosynthesis, forms multifunctional hetero-oligomeric anthranilate synthase:indole-3-glycerol phosphate synthase enzyme complex with Trp3p
YER091C	K.FWVNPDC@GLK.T	MET6	2.683	618.298	0.32	Cobalamin-independent methionine synthase, involved in amino acid biosynthesis; requires a minimum of two glutamates on the methyltetrahydrofolate substrate, similar to bacterial metE homologs
YER091C	K.GMLTGPITC@LR.W	MET6	3.597	617.818	-0.19	Cobalamin-independent methionine synthase, involved in amino acid biosynthesis; requires a minimum of two glutamates on the methyltetrahydrofolate substrate, similar to bacterial metE homologs
YER091C	K.GMLTGPITCLR[.W	MET6	2.27	617.818	-0.02	Cobalamin-independent methionine synthase, involved in amino acid biosynthesis; requires a minimum of two glutamates on the methyltetrahydrofolate substrate, similar to bacterial metE homologs
YER091C	K.TQIHSHFC@YSDLDPNHIK.A	MET6	3.164	553.762	0.19	Cobalamin-independent methionine synthase, involved in amino acid biosynthesis; requires a minimum of two glutamates on the methyltetrahydrofolate substrate, similar to bacterial metE homologs
YER094C	K.D]CVAIAC@DLR.L	PUP3	3.623	596.776	0.28	Beta 3 subunit of the 20S proteasome involved in ubiquitin-dependent catabolism; human homolog is subunit C10
YER099C	K.S]CLLIDDMADTC@GTLVK.A	PRS2	4.101	964.442	-2.04	5-phospho-ribosyl-1(alpha)-pyrophosphate synthetase, synthesizes PRPP, which is required for nucleotide, histidine, and tryptophan biosynthesis; one of five related enzymes, which are active as heteromultimeric complexes
YER107C	K.GYPTLQASIPVC@SFNR.N	GLE2	3.254	905.452	0.39	Component of the nuclear pore complex required for polyadenylated RNA export but not for protein import, homologous to S. pombe Rae1p
YER107C	K.VASGGC@DNALK.L	GLE2	2.748	546.261	-0.28	Component of the nuclear pore complex required for polyadenylated RNA export but not for protein import, homologous to S. pombe Rae1p
YER107C	R.AQHESSSPVLCTR[.W	GLE2	1.801	736.351	-0.35	Component of the nuclear pore complex required for polyadenylated RNA export but not for protein import, homologous to S. pombe Rae1p
YER107C	R.FVQC@GPSNTEC@IVTGSWDK.T	GLE2	4.919	1092.99	-0.85	Component of the nuclear pore complex required for polyadenylated RNA export but not for protein import, homologous to S. pombe Rae1p
YER110C	K.VAC@EEIDVDDELNNEDETGENEENTPSSSAIR.L	KAP123	3.255	1194.17	-0.7	Karyopherin beta, mediates nuclear import of ribosomal proteins prior to assembly into ribosomes and import of histones H3 and H4; localizes to the nuclear pore, nucleus, and cytoplasm; exhibits genetic interactions with RAI1
YER110C	K.VACE#EIDVDDELNNEDETGENEENTPSSSAIR.L	KAP123	3.715	895.88	-0.13	Karyopherin beta, mediates nuclear import of ribosomal proteins prior to assembly into ribosomes and import of histones H3 and H4; localizes to the nuclear pore, nucleus, and cytoplasm; exhibits genetic interactions with RAI1
YER110C	R.AYANASGC@VAR.M	KAP123	2.685	570.267	-0.13	Karyopherin beta, mediates nuclear import of ribosomal proteins prior to assembly into ribosomes and import of histones H3 and H4; localizes to the nuclear pore, nucleus, and cytoplasm; exhibits genetic interactions with RAI1
YER113C	K.FGEDNPC@ETLC@AR.K	TMN3	3.973	784.827	-0.18	Protein with a role in cellular adhesion and filamentous growth; similar to Emp70p and Tmn2p; member of Transmembrane Nine family with 9 transmembrane segments; localizes to Golgi; induced by 8-methoxypsoralen plus UVA irradiation
YER122C	R.VC@FDC@GNK.N	GLO3	1.706	500.205	0.1	ADP-ribosylation factor GTPase activating protein (ARF GAP), involved in ER-Golgi transport; shares functional similarity with Gcs1p
YER125W	K.C]VSEWDNEQR.A	RSP5	2.902	661.775	0.04	Ubiquitin-protein ligase involved in ubiquitin-mediated protein degradation; functions in multivesicular body sorting, heat shock response and ubiquitylation of arrested RNAPII; contains a hect (homologous to E6-AP carboxyl terminus) domain
YER125W	K.SHTC@FNRVDLPQYVDYDSMK.Q	RSP5	3.048	623.531	0.18	Ubiquitin-protein ligase involved in ubiquitin-mediated protein degradation; functions in multivesicular body sorting, heat shock response and ubiquitylation of arrested RNAPII; contains a hect (homologous to E6-AP carboxyl terminus) domain
YER126C	K.YAQVTNEPDRDGC@VNAVLLV.-	NSA2	3.007	1117.05	0.89	Protein constituent of 66S pre-ribosomal particles, contributes to processing of the 27S pre-rRNA
YER129W	K.TPTTTSSFC@SSGSSK.N	SAK1	2.067	767.838	-0.46	Upstream serine/threonine kinase for the SNF1 complex; partially redundant with Elm1p and Tos3p; members of this family have functional orthology with LKB1, a mammalian kinase associated with Peutz-Jeghers cancer-susceptibility syndrome
YER131W	K.LHY#CVSC@AIHAR.I	RPS26B	2.86	496.24	0.81	Protein component of the small (40S) ribosomal subunit; nearly identical to Rps26Ap and has similarity to rat S26 ribosomal protein
YER131W	K.LHYC@VSC@AIHAR.I	RPS26B	2.381	743.856	-0.07	Protein component of the small (40S) ribosomal subunit; nearly identical to Rps26Ap and has similarity to rat S26 ribosomal protein
YER133W	K.IC@GDIHGQYYDLLR.L	GLC7	3.053	574.947	-0.06	Catalytic subunit of type 1 serine/threonine protein phosphatase, involved in many processes including glycogen metabolism, sporulation, and mitosis; interacts with multiple regulatory subunits; predominantly isolated with Sds22p
YER133W	K.QDMELIC@R.A	GLC7	2.438	540.744	-0.05	Catalytic subunit of type 1 serine/threonine protein phosphatase, involved in many processes including glycogen metabolism, sporulation, and mitosis; interacts with multiple regulatory subunits; predominantly isolated with Sds22p
YER133W	K.TFTDC@FNC@LPIAAIIDEK.I	GLC7	5.675	1064.51	0.3	Catalytic subunit of type 1 serine/threonine protein phosphatase, involved in many processes including glycogen metabolism, sporulation, and mitosis; interacts with multiple regulatory subunits; predominantly isolated with Sds22p
YER133W	R.IYGFYDE#CK.R	GLC7	2.61	597.761	0.16	Catalytic subunit of type 1 serine/threonine protein phosphatase, involved in many processes including glycogen metabolism, sporulation, and mitosis; interacts with multiple regulatory subunits; predominantly isolated with Sds22p
YER134C	K.IC@LFDDESR.N	YER134C	2.506	577.761	-0.38	Putative protein of unknown function; non-essential gene
YER141W	R.ELMDENFC@R.R	COX15	2.886	615.249	-0.67	Protein required for the hydroxylation of heme O to form heme A, which is an essential prosthetic group for cytochrome c oxidase
YER143W	R.HLACVD#LK.E	DDI1	2.631	478.255	0.51	DNA damage-inducible v-SNARE binding protein, contains a ubiquitin-associated (UBA) domain, may act as a negative regulator of constitutive exocytosis, may play a role in S-phase checkpoint control
YER151C	K.SFQH#CATADAVKPDEFYK.T	UBP3	4.09	705.326	0.01	Ubiquitin-specific protease that interacts with Bre5p to co-regulate anterograde and retrograde transport between endoplasmic reticulum and Golgi compartments; inhibitor of gene silencing; cleaves ubiquitin fusions but not polyubiquitin
YER155C	K.G]CVLNLYK.S	BEM2	2.214	483.757	-0.17	Rho GTPase activating protein (RhoGAP) involved in the control of cytoskeleton organization and cellular morphogenesis; required for bud emergence
YER159C	R.EGLC@VEEGQTQPEEESA.-	BUR6	3.086	946.396	-0.35	Subunit of a heterodimeric NC2 transcription regulator complex with Ncb2p; complex binds to TBP and can repress transcription by preventing preinitiation complex assembly or stimulate activated transcription; homologous to human NC2alpha
YER165W	K.GFGFVC@FSTPEEATK.A	PAB1	4.079	838.885	0.05	Poly(A) binding protein, part of the 3'-end RNA-processing complex, mediates interactions between the 5' cap structure and the 3' mRNA poly(A) tail, involved in control of poly(A) tail length, interacts with translation factor eIF-4G
YER165W	K.SKGFGFVC@FSTPEEATK.A	PAB1	3.113	631.301	-0.09	Poly(A) binding protein, part of the 3'-end RNA-processing complex, mediates interactions between the 5' cap structure and the 3' mRNA poly(A) tail, involved in control of poly(A) tail length, interacts with translation factor eIF-4G
YER169W	K.I]PCISNETTVDAPIMNPTVQPQDGK.A	RPH1	2.522	914.443	0.54	JmjC domain-containing histone demethylase which can specifically demethylate H3K36 tri- and dimethyl modification states; transcriptional repressor of PHR1; Rph1p phosphorylation during DNA damage is under control of the MEC1-RAD53 pathway
YER174C	K.AQWADPC@K.T	GRX4	2.475	488.221	-0.18	Hydroperoxide and superoxide-radical responsive glutathione-dependent oxidoreductase; monothiol glutaredoxin subfamily member along with Grx3p and Grx5p; protects cells from oxidative damage
YER176W	R.TC@SQAYDAEQMMK.H	ECM32	2.098	789.815	0.15	DNA dependent ATPase/DNA helicase belonging to the Dna2p- and Nam7p-like family of helicases that is involved in modulating translation termination; interacts with the translation termination factors, localized to polysomes
YER178W	K.DWC@LSGK.G	PDA1	2.518	433.197	-0.01	E1 alpha subunit of the pyruvate dehydrogenase (PDH) complex, catalyzes the direct oxidative decarboxylation of pyruvate to acetyl-CoA; phosphorylated; regulated by glucose
YER178W	K.LWNLPVVFC@CE#NNK.Y	PDA1	4.732	896.929	-0.6	E1 alpha subunit of the pyruvate dehydrogenase (PDH) complex, catalyzes the direct oxidative decarboxylation of pyruvate to acetyl-CoA; phosphorylated; regulated by glucose
YER178W	R.MEMAC@DALYK.A	PDA1	2.757	624.259	0.12	E1 alpha subunit of the pyruvate dehydrogenase (PDH) complex, catalyzes the direct oxidative decarboxylation of pyruvate to acetyl-CoA; phosphorylated; regulated by glucose
YER178W	R.MEMACD#ALYK.A	PDA1	3.023	632.256	-0.65	E1 alpha subunit of the pyruvate dehydrogenase (PDH) complex, catalyzes the direct oxidative decarboxylation of pyruvate to acetyl-CoA; phosphorylated; regulated by glucose
YFL005W	K.SC@LLVR.F	SEC4	1.838	374.213	-0.43	Secretory vesicle-associated Rab GTPase essential for exocytosis; associates with the exocyst component Sec15p and may regulate polarized delivery of transport vesicles to the exocyst at the plasma membrane
YFL016C	K.CH#GEGVQVNR.A	MDJ1	1.931	578.27	0.07	Co-chaperone that stimulates the ATPase activity of the HSP70 protein Ssc1p; involved in protein folding/refolding in the mitochodrial matrix; required for proteolysis of misfolded proteins; member of the HSP40 (DnaJ) family of chaperones
YFL016C	K.RPQDNC@TKC@HGEGVQVNR.A	MDJ1	3.185	539.502	-0.14	Co-chaperone that stimulates the ATPase activity of the HSP70 protein Ssc1p; involved in protein folding/refolding in the mitochodrial matrix; required for proteolysis of misfolded proteins; member of the HSP40 (DnaJ) family of chaperones
YFL018C	K.AAQLGFNTAC@VEK.R	LPD1	3.978	704.848	-0.25	Dihydrolipoamide dehydrogenase, the lipoamide dehydrogenase component (E3) of the pyruvate dehydrogenase and 2-oxoglutarate dehydrogenase multi-enzyme complexes
YFL018C	K.LGGTC@LNVGC@IPSK.A	LPD1	3.774	738.371	0	Dihydrolipoamide dehydrogenase, the lipoamide dehydrogenase component (E3) of the pyruvate dehydrogenase and 2-oxoglutarate dehydrogenase multi-enzyme complexes
YFL018C	K.LGGTC@LNVGCIPSK.A	LPD1	3.749	709.861	1.33	Dihydrolipoamide dehydrogenase, the lipoamide dehydrogenase component (E3) of the pyruvate dehydrogenase and 2-oxoglutarate dehydrogenase multi-enzyme complexes
YFL018C	R.VC@HAHPTLSEAFK.E	LPD1	3.388	499.582	0.19	Dihydrolipoamide dehydrogenase, the lipoamide dehydrogenase component (E3) of the pyruvate dehydrogenase and 2-oxoglutarate dehydrogenase multi-enzyme complexes
YFL021W	K.C]SNC@TTSTTPLWR.K	GAT1	2.746	792.349	-2.05	Transcriptional activator of genes involved in nitrogen catabolite repression; contains a GATA-1-type zinc finger DNA-binding motif; activity and localization regulated by nitrogen limitation and Ure2p
YFL022C	R.YNWKPEEC@QK.L	FRS2	3.191	691.314	-0.34	Alpha subunit of cytoplasmic phenylalanyl-tRNA synthetase, forms a tetramer with Frs1p to form active enzyme; evolutionarily distant from mitochondrial phenylalanyl-tRNA synthetase based on protein sequence, but substrate binding is similar
YFL028C	K.HLC@LDGK.I	CAF16	2.084	421.713	-0.47	Part of the evolutionarily-conserved CCR4-NOT transcriptional regulatory complex involved in controlling mRNA initiation, elongation, and degradation; putative ABC ATPase; interacts with Ssn2p, Ssn3p, and Ssn8p
YFL037W	R.EAEGC@DSLQGFQITHSLGGGTGSGMGTLLISK.I	TUB2	3.866	1075.51	-0.38	Beta-tubulin; associates with alpha-tubulin (Tub1p and Tub3p) to form tubulin dimer, which polymerizes to form microtubules
YFL039C	K.L]CYVALDFEQEMQTAAQSSSIEK.S	ACT1	3.779	888.744	0.21	Actin, structural protein involved in cell polarization, endocytosis, and other cytoskeletal functions
YFL039C	K.LC@YVALDFEQEMQTAAQSSSIEK.S	ACT1	2.764	888.744	0.63	Actin, structural protein involved in cell polarization, endocytosis, and other cytoskeletal functions
YFL041W	K.LNENYLDIC@K.A	FET5	3.839	641.311	-0.16	Multicopper oxidase, integral membrane protein with similarity to Fet3p; may have a role in iron transport
YFL041W	R.ALNIEDC@DLDR.A	FET5	2.758	667.306	-0.88	Multicopper oxidase, integral membrane protein with similarity to Fet3p; may have a role in iron transport
YFL045C	K.C]C@IGFVGGSDLSK.Q	SEC53	4.265	700.321	0.24	Phosphomannomutase, involved in synthesis of GDP-mannose and dolichol-phosphate-mannose; required for folding and glycosylation of secretory proteins in the ER lumen
YFL045C	R.NKC@C@IGFVGGSDLSK.Q	SEC53	3.691	821.39	-0.24	Phosphomannomutase, involved in synthesis of GDP-mannose and dolichol-phosphate-mannose; required for folding and glycosylation of secretory proteins in the ER lumen
YFL047W	K.YC@NGVGNTFVNSK.K	RGD2	2.793	730.336	0.72	GTPase-activating protein (RhoGAP) for Cdc42p and Rho5p
YFL048C	K.IYDQSFASCLMGY#QDSSVPSTIR.V	EMP47	3.265	881.068	-0.15	Integral membrane component of endoplasmic reticulum-derived COPII-coated vesicles, which function in ER to Golgi transport
YFR006W	R.SLGYDPIC@C@SGPAC@GTLHYVK.N	YFR006W	2.434	785.69	-0.18	Putative X-Pro aminopeptidase; green fluorescent protein (GFP)-fusion protein localizes to the cytoplasm; YFR006W is not an essential gene
YFR007W	K.YSALTSNNEEC@TAVVAR.G	YFH7	3.597	942.942	0.5	Putative kinase with similarity to the phosphoribulokinase/uridine kinase/bacterial pantothenate kinase (PRK/URK/PANK) subfamily of P-loop kinases; null mutant displays decreased frequency of mitochondrial genome loss (petite formation)
YFR011C	K.LTE#CLLANK.G	YFR011C	1.659	531.286	-0.52	Putative protein of unknown function; non-tagged protein is detected in highly purified mitochondria; null mutant displays increased frequency of mitochondrial genome loss (petite formation) and reduced growth rate in minimal glycerol media
YFR014C	R.VC@SSDSDLPGSDIK.S	CMK1	3.509	740.334	-1.12	Calmodulin-dependent protein kinase; may play a role in stress response, many CA++/calmodulan dependent phosphorylation substrates demonstrated in vitro, amino acid sequence similar to Cmk2p and mammalian Cam Kinase II
YFR014C	R.VQDFLDEC@TTGEYPVK.F	CMK1	4.838	950.935	-0.31	Calmodulin-dependent protein kinase; may play a role in stress response, many CA++/calmodulan dependent phosphorylation substrates demonstrated in vitro, amino acid sequence similar to Cmk2p and mammalian Cam Kinase II
YFR024C-A	K.FYGDNC@TAK.M	LSB3	2.199	538.229	-0.55	Protein containing a C-terminal SH3 domain; binds Las17p, which is a homolog of human Wiskott-Aldrich Syndrome protein involved in actin patch assembly and actin polymerization
YFR033C	K.ALVHHYEEC@AER.V	QCR6	3.728	505.233	-0.21	Subunit 6 of the ubiquinol cytochrome-c reductase complex, which is a component of the mitochondrial inner membrane electron transport chain; highly acidic protein; required for maturation of cytochrome c1
YFR037C	K.L]CDLETQLEMEK.L	RSC8	3.526	762.849	-0.35	Component of the RSC chromatin remodeling complex; essential for viability and mitotic growth; homolog of SWI/SNF subunit Swi3p, but unlike Swi3p, does not activate transcription of reporters
YFR037C	K.LC@DLETQLEMEK.L	RSC8	3.541	754.852	0.13	Component of the RSC chromatin remodeling complex; essential for viability and mitotic growth; homolog of SWI/SNF subunit Swi3p, but unlike Swi3p, does not activate transcription of reporters
YFR037C	K.LMEC@VNDAVQTLLQGDDKLGK.V	RSC8	4.333	788.391	0.67	Component of the RSC chromatin remodeling complex; essential for viability and mitotic growth; homolog of SWI/SNF subunit Swi3p, but unlike Swi3p, does not activate transcription of reporters
YFR037C	K.RVEDC@IEK.F	RSC8	2.441	524.758	-0.02	Component of the RSC chromatin remodeling complex; essential for viability and mitotic growth; homolog of SWI/SNF subunit Swi3p, but unlike Swi3p, does not activate transcription of reporters
YFR037C	K.VYIC@HTC@GNESINVR.Y	RSC8	3.423	607.951	0.29	Component of the RSC chromatin remodeling complex; essential for viability and mitotic growth; homolog of SWI/SNF subunit Swi3p, but unlike Swi3p, does not activate transcription of reporters
YFR041C	R.IENFISQCK#.Q	ERJ5	2.635	569.782	-0.15	Type I membrane protein with a J domain is required to preserve the folding capacity of the endoplasmic reticulum; loss of the non-essential ERJ5 gene leads to a constitutively induced unfolded protein response
YFR044C	K.GVDAVC@ISDNYWLGTK.K	DUG1	3.648	899.427	0.03	Probable di- and tri-peptidase; forms a complex with Dug2p and Dug3p to degrade glutathione (GSH) and other peptides containing a gamma-glu-X bond in an alternative pathway to GSH degradation by gamma-glutamyl transpeptidase (Ecm38p)
YFR047C	K.MC@AQSLK.N	BNA6	2.049	419.201	-0.35	Quinolinate phosphoribosyl transferase, required for the de novo biosynthesis of NAD from tryptophan via kynurenine; expression regulated by Hst1p
YFR052W	K.SLSIAFENGDYAAC@EK.L	RPN12	3.574	887.901	0.01	Subunit of the 19S regulatory particle of the 26S proteasome lid; synthetically lethal with RPT1, which is an ATPase component of the 19S regulatory particle; physically interacts with Nob1p and Rpn3p
YFR053C	K.LADDIPSNSPMAINCEYGSFDNEH#LVLPR.T	HXK1	2.808	823.382	-0.42	Hexokinase isoenzyme 1, a cytosolic protein that catalyzes phosphorylation of glucose during glucose metabolism; expression is highest during growth on non-glucose carbon sources; glucose-induced repression involves the hexokinase Hxk2p
YFR053C	K.LEGKLADDIPSNSPMAINC@EYGSFDNEHLVLPR.T	HXK1	3.492	930.194	0.79	Hexokinase isoenzyme 1, a cytosolic protein that catalyzes phosphorylation of glucose during glucose metabolism; expression is highest during growth on non-glucose carbon sources; glucose-induced repression involves the hexokinase Hxk2p
YFR053C	R.LAVC@GIAAIC@QK.R	HXK1	3.716	652.347	1.1	Hexokinase isoenzyme 1, a cytosolic protein that catalyzes phosphorylation of glucose during glucose metabolism; expression is highest during growth on non-glucose carbon sources; glucose-induced repression involves the hexokinase Hxk2p
YFR053C	R.LAVC@GIAAICQK.R	HXK1	3.085	623.836	0	Hexokinase isoenzyme 1, a cytosolic protein that catalyzes phosphorylation of glucose during glucose metabolism; expression is highest during growth on non-glucose carbon sources; glucose-induced repression involves the hexokinase Hxk2p
YFR053C	R.LC@ELIGTR.A	HXK1	2.623	481.261	0.77	Hexokinase isoenzyme 1, a cytosolic protein that catalyzes phosphorylation of glucose during glucose metabolism; expression is highest during growth on non-glucose carbon sources; glucose-induced repression involves the hexokinase Hxk2p
YGL001C	K.ANVVVHC@ASPMHGQNPDIYDIVNVK.G	ERG26	3.08	931.787	0.23	C-3 sterol dehydrogenase, catalyzes the second of three steps required to remove two C-4 methyl groups from an intermediate in ergosterol biosynthesis
YGL006W	K.CE#ADESSITGESNTIQK.F	PMC1	3.084	934.913	0.29	Vacuolar Ca2+ ATPase involved in depleting cytosol of Ca2+ ions; prevents growth inhibition by activation of calcineurin in the presence of elevated concentrations of calcium; similar to mammalian PMCA1a
YGL006W	K.IADC@MLISGSR.I	PMC1	3.121	619.797	0.69	Vacuolar Ca2+ ATPase involved in depleting cytosol of Ca2+ ions; prevents growth inhibition by activation of calcineurin in the presence of elevated concentrations of calcium; similar to mammalian PMCA1a
YGL006W	R.S]CETMGSATAVC@SDK.T	PMC1	3.349	802.323	-0.21	Vacuolar Ca2+ ATPase involved in depleting cytosol of Ca2+ ions; prevents growth inhibition by activation of calcineurin in the presence of elevated concentrations of calcium; similar to mammalian PMCA1a
YGL006W	R.SC@ETMGSATAVC@SDK.T	PMC1	2.73	802.324	0.31	Vacuolar Ca2+ ATPase involved in depleting cytosol of Ca2+ ions; prevents growth inhibition by activation of calcineurin in the presence of elevated concentrations of calcium; similar to mammalian PMCA1a
YGL008C	K.E]TCRQLGLGTNIYNAER.L	PMA1	1.962	997.989	0.11	Plasma membrane H+-ATPase, pumps protons out of the cell; major regulator of cytoplasmic pH and plasma membrane potential; part of the P2 subgroup of cation-transporting ATPases
YGL008C	K.KVTAVVESPEGERIVC@VK.G	PMA1	2.824	667.366	-0.3	Plasma membrane H+-ATPase, pumps protons out of the cell; major regulator of cytoplasmic pH and plasma membrane potential; part of the P2 subgroup of cation-transporting ATPases
YGL008C	K.MLTGDAVGIAKETCR[.Q	PMA1	2.304	546.604	0.03	Plasma membrane H+-ATPase, pumps protons out of the cell; major regulator of cytoplasmic pH and plasma membrane potential; part of the P2 subgroup of cation-transporting ATPases
YGL008C	K.NKLSLHEPYTVEGVSPDDLMLTAC@LAASR.K	PMA1	4.797	801.648	-0.36	Plasma membrane H+-ATPase, pumps protons out of the cell; major regulator of cytoplasmic pH and plasma membrane potential; part of the P2 subgroup of cation-transporting ATPases
YGL008C	K.RGEGHWEILGVMPC@MDPPRDDTAQTVSEAR.H	PMA1	2.788	689.318	0.36	Plasma membrane H+-ATPase, pumps protons out of the cell; major regulator of cytoplasmic pH and plasma membrane potential; part of the P2 subgroup of cation-transporting ATPases
YGL008C	R.GEGHWEILGVMPCMD#PPRDDTAQTVSEAR.H	PMA1	2.98	822.37	0.22	Plasma membrane H+-ATPase, pumps protons out of the cell; major regulator of cytoplasmic pH and plasma membrane potential; part of the P2 subgroup of cation-transporting ATPases
YGL008C	R.IVTEDC@FLQIDQSAITGESLAVDK.H	PMA1	5.943	884.774	-0.23	Plasma membrane H+-ATPase, pumps protons out of the cell; major regulator of cytoplasmic pH and plasma membrane potential; part of the P2 subgroup of cation-transporting ATPases
YGL009C	K.HC@LVNGLDDIGITLQK.E	LEU1	2.864	599.317	0.22	Isopropylmalate isomerase, catalyzes the second step in the leucine biosynthesis pathway
YGL009C	K.LC@VDLPNQK.I	LEU1	3.127	543.784	0.13	Isopropylmalate isomerase, catalyzes the second step in the leucine biosynthesis pathway
YGL009C	K.VFIGSC@TNGR.I	LEU1	2.6	555.772	0.08	Isopropylmalate isomerase, catalyzes the second step in the leucine biosynthesis pathway
YGL009C	R.E#AGCSIC@LGMNPDILDAYER.C	LEU1	2.846	767.337	-0.72	Isopropylmalate isomerase, catalyzes the second step in the leucine biosynthesis pathway
YGL009C	R.EAGC@SIC@LGMNPDILDAYER.C	LEU1	3.091	1150.5	1.13	Isopropylmalate isomerase, catalyzes the second step in the leucine biosynthesis pathway
YGL009C	R.MSMC@NMAIEAGAR.A	LEU1	2.173	737.301	-0.37	Isopropylmalate isomerase, catalyzes the second step in the leucine biosynthesis pathway
YGL009C	R.RVDC@TLATVDHNIPTESR.K	LEU1	3.41	695.345	0.11	Isopropylmalate isomerase, catalyzes the second step in the leucine biosynthesis pathway
YGL011C	K.YGYDMPC@DVLAK.R	SCL1	4.164	716.318	-0.24	Alpha 1 subunit of the 20S core complex of the 26S proteasome involved in the degradation of ubiquitinated substrates; essential for growth; detected in the mitochondria
YGL011C	K.YGYDMPCD#VLAK.R	SCL1	2.455	724.315	-0.08	Alpha 1 subunit of the 20S core complex of the 26S proteasome involved in the degradation of ubiquitinated substrates; essential for growth; detected in the mitochondria
YGL011C	R.GKDC@TVVISQK.K	SCL1	2.531	617.826	-0.44	Alpha 1 subunit of the 20S core complex of the 26S proteasome involved in the degradation of ubiquitinated substrates; essential for growth; detected in the mitochondria
YGL013C	R.C]TDGPC@AVEQPTK.F	PDR1	3.19	731.818	-1.16	Zinc cluster protein that is a master regulator involved in recruiting other zinc cluster proteins to pleiotropic drug response elements (PDREs) to fine tune the regulation of multidrug resistance genes
YGL014W	R.HGC@C@VLQR.C	PUF4	2.489	515.24	0.22	Member of the PUF protein family, which is defined by the presence of Pumilio homology domains that confer RNA binding activity; preferentially binds mRNAs encoding nucleolar ribosomal RNA-processing factors
YGL017W	R.ITSEDYC@PAAVASSDFVGK.I	ATE1	3.116	1008.97	1.52	Arginyl-tRNA-protein transferase, catalyzes post-translational conjugation of arginine to the amino termini of acceptor proteins which are then subject to degradation via the N-end rule pathway
YGL019W	R.LYC@PSC@QDLYLPQSSR.F	CKB1	3.758	993.957	0.79	Beta regulatory subunit of casein kinase 2, a Ser/Thr protein kinase with roles in cell growth and proliferation; the holoenzyme also contains CKA1, CKA2 and CKB2, the many substrates include transcription factors and all RNA polymerases
YGL019W	R.Y#YCNGMQLLPC@GLSDTVGK.H	CKB1	3.055	1096.49	-1.33	Beta regulatory subunit of casein kinase 2, a Ser/Thr protein kinase with roles in cell growth and proliferation; the holoenzyme also contains CKA1, CKA2 and CKB2, the many substrates include transcription factors and all RNA polymerases
YGL019W	R.YYC@NGMQLLPC@GLSDTVGK.H	CKB1	3.356	731.331	-1.34	Beta regulatory subunit of casein kinase 2, a Ser/Thr protein kinase with roles in cell growth and proliferation; the holoenzyme also contains CKA1, CKA2 and CKB2, the many substrates include transcription factors and all RNA polymerases
YGL026C	K.IVTLCGD#APEGK.R	TRP5	3.179	630.319	0.93	Tryptophan synthase involved in tryptophan biosynthesis, regulated by the general control system of amino acid biosynthesis
YGL026C	K.IVTLCGD#APEGKR.Y	TRP5	2.509	472.582	-0.29	Tryptophan synthase involved in tryptophan biosynthesis, regulated by the general control system of amino acid biosynthesis
YGL026C	K.NVIAETGAGQHGVATATAC@AK.F	TRP5	2.983	1014	0.22	Tryptophan synthase involved in tryptophan biosynthesis, regulated by the general control system of amino acid biosynthesis
YGL026C	R.FGDFGGQYVPEALHACLR[.E	TRP5	3.137	679.66	-0.2	Tryptophan synthase involved in tryptophan biosynthesis, regulated by the general control system of amino acid biosynthesis
YGL026C	R.LTEHC@QGAQIWLK.R	TRP5	4.019	528.605	-0.11	Tryptophan synthase involved in tryptophan biosynthesis, regulated by the general control system of amino acid biosynthesis
YGL027C	K.NPEYETMEVAPGSD#CSK.T	CWH41	2.438	965.395	-0.55	Processing alpha glucosidase I, ER type II integral membrane N-glycoprotein involved in assembly of cell wall beta 1,6 glucan and asparagine-linked protein glycosylation; also involved in ER protein quality control and sensing of ER stress
YGL027C	K.NPEYETMEVAPGSDC@SK.T	CWH41	3.716	965.395	-0.4	Processing alpha glucosidase I, ER type II integral membrane N-glycoprotein involved in assembly of cell wall beta 1,6 glucan and asparagine-linked protein glycosylation; also involved in ER protein quality control and sensing of ER stress
YGL027C	R.TFTH#CLPSGMDDYPR.A	CWH41	4.628	599.596	-0.24	Processing alpha glucosidase I, ER type II integral membrane N-glycoprotein involved in assembly of cell wall beta 1,6 glucan and asparagine-linked protein glycosylation; also involved in ER protein quality control and sensing of ER stress
YGL028C	K.AIAYSPYNDDGSC@K.S	SCW11	3.332	780.835	-0.45	Cell wall protein with similarity to glucanases; may play a role in conjugation during mating based on its regulation by Ste12p
YGL039W	K.AHLLAFEKPEC@AGQR.L	YGL039W	2.366	432.473	-0.36	Oxidoreductase, catalyzes NADPH-dependent reduction of the bicyclic diketone bicyclo[2.2.2]octane-2,6-dione (BCO2,6D) to the chiral ketoalcohol (1R,4S,6S)-6-hydroxybicyclo[2.2.2]octane-2-one (BCO2one6ol)
YGL040C	K.A]GAHCVAPSDMIDGR.I	HEM2	4.029	519.57	0.11	Delta-aminolevulinate dehydratase, a homo-octameric enzyme, catalyzes the conversion of delta-aminolevulinic acid to porphobilinogen, the second step in the heme biosynthetic pathway; localizes to both the cytoplasm and nucleus
YGL040C	K.AGAHC@VAPSDMIDGR.I	HEM2	2.162	786.848	0	Delta-aminolevulinate dehydratase, a homo-octameric enzyme, catalyzes the conversion of delta-aminolevulinic acid to porphobilinogen, the second step in the heme biosynthetic pathway; localizes to both the cytoplasm and nucleus
YGL040C	K.FSGNLYGPFRD#AACSAPSNGDRK.C	HEM2	3.748	622.543	1.58	Delta-aminolevulinate dehydratase, a homo-octameric enzyme, catalyzes the conversion of delta-aminolevulinic acid to porphobilinogen, the second step in the heme biosynthetic pathway; localizes to both the cytoplasm and nucleus
YGL043W	K.AIESEMNKVNNC@DTNEAAYK.A	DST1	2.613	773.008	0.77	General transcription elongation factor TFIIS, enables RNA polymerase II to read through blocks to elongation by stimulating cleavage of nascent transcripts stalled at transcription arrest sites
YGL043W	K.IANGDITPEFLATC@DAK.D	DST1	3.762	918.446	-0.23	General transcription elongation factor TFIIS, enables RNA polymerase II to read through blocks to elongation by stimulating cleavage of nascent transcripts stalled at transcription arrest sites
YGL043W	K.VNNC@DTNEAAYK.A	DST1	3.476	699.801	-0.47	General transcription elongation factor TFIIS, enables RNA polymerase II to read through blocks to elongation by stimulating cleavage of nascent transcripts stalled at transcription arrest sites
YGL043W	R.SADEPLTTFC@TC@EAC@GNR.W	DST1	4.519	1044.92	-0.55	General transcription elongation factor TFIIS, enables RNA polymerase II to read through blocks to elongation by stimulating cleavage of nascent transcripts stalled at transcription arrest sites
YGL048C	K.G]VCTEAGMYALR.E	RPT6	3.845	672.307	-0.48	One of six ATPases of the 19S regulatory particle of the 26S proteasome involved in the degradation of ubiquitinated substrates; bound by ubiquitin-protein ligases Ubr1p and Ufd4p; localized mainly to the nucleus throughout the cell cycle
YGL050W	K.ELINC@APDVNSK.V	TYW3	2.122	680.332	-0.11	tRNA methyltransferase required for synthesis of wybutosine, a modified guanosine found at the 3'-position adjacent to the anticodon of phenylalanine tRNA which supports reading frame maintenance by stabilizing codon-anticodon interactions
YGL062W	R.FGDVDEC@DVASYNMYPR.V	PYC1	4.026	1027.42	0.31	Pyruvate carboxylase isoform, cytoplasmic enzyme that converts pyruvate to oxaloacetate; highly similar to isoform Pyc2p but differentially regulated; mutations in the human homolog are associated with lactic acidosis
YGL065C	K.LVIC@GGYDER.V	ALG2	2.646	591.285	0.44	Mannosyltransferase that catalyzes two consecutive steps in the N-linked glycosylation pathway; alg2 mutants exhibit temperature-sensitive growth and abnormal accumulation of the lipid-linked oligosaccharide Man2GlcNAc2-PP-Dol
YGL066W	K.QC@GVELPEGGYC@AR.S	SGF73	2.876	798.351	0.78	Subunit of SAGA histone acetyltransferase complex; involved in formation of the preinitiation complex assembly at promoters; null mutant displays defects in premeiotic DNA synthesis
YGL067W	K.FC@PGC@GSPLFPVEAGTK.L	NPY1	2.165	912.426	-0.37	NADH diphosphatase (pyrophosphatase), hydrolyzes the pyrophosphate linkage in NADH and related nucleotides; localizes to peroxisomes
YGL067W	R.INNVC@FPR.T	NPY1	2.9	510.258	-0.92	NADH diphosphatase (pyrophosphatase), hydrolyzes the pyrophosphate linkage in NADH and related nucleotides; localizes to peroxisomes
YGL070C	R.TC@SYVEEAGSPLVYR.H	RPB9	3.107	865.904	-2.86	RNA polymerase II subunit B12.6; contacts DNA; mutations affect transcription start site; involved in telomere maintenance
YGL086W	K.EC@LILTDMNDK.L	MAD1	1.98	684.312	-0.37	Coiled-coil protein involved in the spindle-assembly checkpoint; phosphorylated by Mps1p upon checkpoint activation which leads to inhibition of the activity of the anaphase promoting complex; forms a complex with Mad2p
YGL087C	K.GFGPESC@SYGLADSDDITMTK.W	MMS2	4.816	1133.98	-0.15	Protein involved in error-free postreplication DNA repair; forms a heteromeric complex with Ubc13p that has a ubiquitin-conjugating activity; cooperates with chromatin-associated RING finger proteins, Rad18p and Rad5p
YGL087C	K.GFGPESCSY#GLADSDDITMTK.W	MMS2	2.482	756.32	-0.43	Protein involved in error-free postreplication DNA repair; forms a heteromeric complex with Ubc13p that has a ubiquitin-conjugating activity; cooperates with chromatin-associated RING finger proteins, Rad18p and Rad5p
YGL087C	R.IYSLSIDC@GPNYPDSPPK.V	MMS2	3.981	1011.98	0.93	Protein involved in error-free postreplication DNA repair; forms a heteromeric complex with Ubc13p that has a ubiquitin-conjugating activity; cooperates with chromatin-associated RING finger proteins, Rad18p and Rad5p
YGL092W	K.SSSFGYWC@SPSPEQLER.L	NUP145	3.186	1008.94	-0.21	Essential nucleoporin, catalyzes its own cleavage in vivo to generate a C-terminal fragment that assembles into the Nup84p subcomplex of the nuclear pore complex, and an N-terminal fragment of unknown function that is homologous to Nup100p
YGL097W	K.YIASGENHC@FALTK.D	SRM1	3.563	805.884	-1.92	Nucleotide exchange factor for Gsp1p, localizes to the nucleus, required for nucleocytoplasmic trafficking of macromolecules; suppressor of the pheromone response pathway; potentially phosphorylated by Cdc28p
YGL097W	R.C@NEGILGFYQDK.I	SRM1	3.271	722.332	0.24	Nucleotide exchange factor for Gsp1p, localizes to the nucleus, required for nucleocytoplasmic trafficking of macromolecules; suppressor of the pheromone response pathway; potentially phosphorylated by Cdc28p
YGL100W	K.LC@TLNDSK.G	SEH1	1.742	475.734	-0.33	Nuclear pore protein that is part of the evolutionarily conserved Nup84p complex (Nup84p, Nup85p, Nup120p, Nup145p, and Seh1p); homologous to Sec13p
YGL100W	K.LWEEDPDQEEC@SGR.R	SEH1	4.062	875.355	-0.19	Nuclear pore protein that is part of the evolutionarily conserved Nup84p complex (Nup84p, Nup85p, Nup120p, Nup145p, and Seh1p); homologous to Sec13p
YGL111W	R.LLVSC@VDSGSIK.E	NSA1	3.138	639.342	-0.16	Constituent of 66S pre-ribosomal particles, involved in 60S ribosomal subunit biogenesis
YGL122C	K.VIDLMWC@DK.N	NAB2	2.306	598.278	0.37	Nuclear polyadenylated RNA-binding protein; autoregulates mRNA levels; related to human hnRNPs; has nuclear localization signal sequence that binds to Kap104p; required for poly(A) tail length control and nuclear mRNA export
YGL123W	K.C@GSVTVR.L	RPS2	1.622	389.698	0.2	Protein component of the small (40S) subunit, essential for control of translational accuracy; has similarity to E. coli S5 and rat S2 ribosomal proteins
YGL135W	K.L]PNC@PRPNMSICIFGDAFDVDRAK.S	RPL1B	3.779	937.11	-1.77	N-terminally acetylated protein component of the large (60S) ribosomal subunit, nearly identical to Rpl1Ap and has similarity to E. coli L1 and rat L10a ribosomal proteins; rpl1a rpl1b double null mutation is lethal
YGL135W	K.LPNC@PRPNMSIC@IFGDAFDVDR.A	RPL1B	5.652	870.735	-0.03	N-terminally acetylated protein component of the large (60S) ribosomal subunit, nearly identical to Rpl1Ap and has similarity to E. coli L1 and rat L10a ribosomal proteins; rpl1a rpl1b double null mutation is lethal
YGL135W	K.LPNC@PRPNMSIC@IFGDAFDVDRAK.S	RPL1B	2.996	703.086	0.01	N-terminally acetylated protein component of the large (60S) ribosomal subunit, nearly identical to Rpl1Ap and has similarity to E. coli L1 and rat L10a ribosomal proteins; rpl1a rpl1b double null mutation is lethal
YGL135W	K.S]CGVDAMSVDDLK.K	RPL1B	2.308	706.805	-0.62	N-terminally acetylated protein component of the large (60S) ribosomal subunit, nearly identical to Rpl1Ap and has similarity to E. coli L1 and rat L10a ribosomal proteins; rpl1a rpl1b double null mutation is lethal
YGL135W	K.S]CGVDAMSVDDLKK.L	RPL1B	3.882	770.853	0.14	N-terminally acetylated protein component of the large (60S) ribosomal subunit, nearly identical to Rpl1Ap and has similarity to E. coli L1 and rat L10a ribosomal proteins; rpl1a rpl1b double null mutation is lethal
YGL135W	K.SC@GVDAMSVDDLK.K	RPL1B	3.751	706.805	-0.68	N-terminally acetylated protein component of the large (60S) ribosomal subunit, nearly identical to Rpl1Ap and has similarity to E. coli L1 and rat L10a ribosomal proteins; rpl1a rpl1b double null mutation is lethal
YGL135W	K.SC@GVDAMSVDDLKK.L	RPL1B	2.081	514.237	-0.21	N-terminally acetylated protein component of the large (60S) ribosomal subunit, nearly identical to Rpl1Ap and has similarity to E. coli L1 and rat L10a ribosomal proteins; rpl1a rpl1b double null mutation is lethal
YGL135W	K.SCGVDAMSVDDLK.K	RPL1B	2.609	678.294	-0.82	N-terminally acetylated protein component of the large (60S) ribosomal subunit, nearly identical to Rpl1Ap and has similarity to E. coli L1 and rat L10a ribosomal proteins; rpl1a rpl1b double null mutation is lethal
YGL137W	K.DPSTFASGC@LDR.T	SEC27	3.221	663.293	-0.08	Essential beta'-coat protein of the COPI coatomer, involved in ER-to-Golgi and Golgi-to-ER transport; contains WD40 domains that mediate cargo selective interactions; 45% sequence identity to mammalian beta'-COP
YGL137W	R.SWC@IATHPTGR.K	SEC27	2.991	643.309	0.52	Essential beta'-coat protein of the COPI coatomer, involved in ER-to-Golgi and Golgi-to-ER transport; contains WD40 domains that mediate cargo selective interactions; 45% sequence identity to mammalian beta'-COP
YGL137W	R.V]CGAEGLPGSSSSGDAQPLIDLDSTPAPEQADENK.E	SEC27	2.832	1171.54	0.57	Essential beta'-coat protein of the COPI coatomer, involved in ER-to-Golgi and Golgi-to-ER transport; contains WD40 domains that mediate cargo selective interactions; 45% sequence identity to mammalian beta'-COP
YGL140C	R.SYEPEC@PVAYEK.N	YGL140C	3.568	736.324	-0.03	Putative protein of unknown function; non-essential gene; contains multiple predicted transmembrane domains
YGL148W	K.DSIGGVVTC@VVR.N	ARO2	3.356	631.332	0	Bifunctional chorismate synthase and flavin reductase, catalyzes the conversion of 5-enolpyruvylshikimate 3-phosphate (EPSP) to form chorismate, which is a precursor to aromatic amino acids
YGL148W	K.SVGCIVD#GVPPGMSLTEADIQPQLTR.R	ARO2	2.407	919.458	0.09	Bifunctional chorismate synthase and flavin reductase, catalyzes the conversion of 5-enolpyruvylshikimate 3-phosphate (EPSP) to form chorismate, which is a precursor to aromatic amino acids
YGL148W	K.VDSMGPIRC@PDASVAGLMVK.E	ARO2	4.528	712.348	0.67	Bifunctional chorismate synthase and flavin reductase, catalyzes the conversion of 5-enolpyruvylshikimate 3-phosphate (EPSP) to form chorismate, which is a precursor to aromatic amino acids
YGL148W	R.C@PDASVAGLMVK.E	ARO2	4.019	632.307	0.01	Bifunctional chorismate synthase and flavin reductase, catalyzes the conversion of 5-enolpyruvylshikimate 3-phosphate (EPSP) to form chorismate, which is a precursor to aromatic amino acids
YGL148W	R.C]PDASVAGLMVK.E	ARO2	2.88	632.307	0.09	Bifunctional chorismate synthase and flavin reductase, catalyzes the conversion of 5-enolpyruvylshikimate 3-phosphate (EPSP) to form chorismate, which is a precursor to aromatic amino acids
YGL148W	R.VTTYGESHC@K.S	ARO2	2.011	394.513	0.03	Bifunctional chorismate synthase and flavin reductase, catalyzes the conversion of 5-enolpyruvylshikimate 3-phosphate (EPSP) to form chorismate, which is a precursor to aromatic amino acids
YGL157W	K.AHLVAIEKPEC@TGQR.L	YGL157W	2.799	570.298	0.08	Oxidoreductase, catalyzes NADPH-dependent reduction of the bicyclic diketone bicyclo[2.2.2]octane-2,6-dione (BCO2,6D) to the chiral ketoalcohol (1R,4S,6S)-6-hydroxybicyclo[2.2.2]octane-2-one (BCO2one6ol)
YGL157W	K.DC@IVDTAAQMLEVQNEA.-	YGL157W	3.455	961.929	1.42	Oxidoreductase, catalyzes NADPH-dependent reduction of the bicyclic diketone bicyclo[2.2.2]octane-2,6-dione (BCO2,6D) to the chiral ketoalcohol (1R,4S,6S)-6-hydroxybicyclo[2.2.2]octane-2-one (BCO2one6ol)
YGL157W	K.DTWDSC@QANAVAAYCGSK#.K	YGL157W	4.763	1002.41	-0.53	Oxidoreductase, catalyzes NADPH-dependent reduction of the bicyclic diketone bicyclo[2.2.2]octane-2,6-dione (BCO2,6D) to the chiral ketoalcohol (1R,4S,6S)-6-hydroxybicyclo[2.2.2]octane-2-one (BCO2one6ol)
YGL157W	K.VGGEFYNYC@GPFIDVR.D	YGL157W	4.946	946.935	-0.48	Oxidoreductase, catalyzes NADPH-dependent reduction of the bicyclic diketone bicyclo[2.2.2]octane-2,6-dione (BCO2,6D) to the chiral ketoalcohol (1R,4S,6S)-6-hydroxybicyclo[2.2.2]octane-2-one (BCO2one6ol)
YGL166W	K.NFNPSGGC@MC@ASAR.R	CUP2	1.901	772.806	0.65	Copper-binding transcription factor; activates transcription of the metallothionein genes CUP1-1 and CUP1-2 in response to elevated copper concentrations
YGL167C	K.ATINEC@ANSMASEGLR.V	PMR1	3.358	870.388	-0.12	High affinity Ca2+/Mn2+ P-type ATPase required for Ca2+ and Mn2+ transport into Golgi; involved in Ca2+ dependent protein sorting and processing; mutations in human homolog ATP2C1 cause acantholytic skin condition Hailey-Hailey disease
YGL167C	R.C@GQESHVLASTLVPGDLVHFR.I	PMR1	3.268	581.297	-0.39	High affinity Ca2+/Mn2+ P-type ATPase required for Ca2+ and Mn2+ transport into Golgi; involved in Ca2+ dependent protein sorting and processing; mutations in human homolog ATP2C1 cause acantholytic skin condition Hailey-Hailey disease
YGL169W	K.LGGEAWSLC@K.V	SUA5	3.294	560.776	-0.89	Protein required for respiratory growth; null mutation suppresses the Cyc1p translation defect caused by the presence of an aberrant ATG codon upstream of the correct start
YGL169W	K.VVLLVPHCEGDGILK[.G	SUA5	2.844	550.308	0.1	Protein required for respiratory growth; null mutation suppresses the Cyc1p translation defect caused by the presence of an aberrant ATG codon upstream of the correct start
YGL173C	R.KGEIKPSSGTNSTEC@QSPK.S	KEM1	3.886	678.997	-0.16	Evolutionarily-conserved 5'-3' exonuclease component of cytoplasmic processing (P) bodies involved in mRNA decay; plays a role in microtubule-mediated processes, filamentous growth, ribosomal RNA maturation, and telomere maintenance
YGL187C	R.C@WEC@GSVYK.L	COX4	2.368	594.744	0.35	Subunit IV of cytochrome c oxidase, which is the terminal member of the mitochondrial inner membrane electron transport chain; N-terminal 25 residues of precursor are cleaved during mitochondrial import; phosphorylated
YGL190C	K.LC@DMRQNSLC@DNK.T	CDC55	2.358	551.91	0.07	Non-essential regulatory subunit B of protein phosphatase 2A, which has multiple roles in mitosis and protein biosynthesis; involved in regulation of mitotic exit; found in the nucleus of most cells, also at the bud neck and at the bud tip
YGL195W	K.YC@EYLGK.E	GCN1	1.65	466.713	-0.14	Positive regulator of the Gcn2p kinase activity, forms a complex with Gcn20p; proposed to stimulate Gcn2p activation by an uncharged tRNA
YGL196W	K.LSQEC@GVPIK.F	DSD1	3.111	565.797	0.1	D-serine dehydratase (aka D-serine ammonia-lyase); converts D-serine to pyruvate and ammonia; specifc for D-serine, unlike the bacterial enzyme which recognizes both D-serine and L-serine as substrates
YGL196W	K.NC@TTMLNNVEK.L	DSD1	3.042	662.305	-0.3	D-serine dehydratase (aka D-serine ammonia-lyase); converts D-serine to pyruvate and ammonia; specifc for D-serine, unlike the bacterial enzyme which recognizes both D-serine and L-serine as substrates
YGL200C	K.GHFQYC@FLNENTGIETK.D	EMP24	4.853	686.651	-0.52	Integral membrane component of endoplasmic reticulum-derived COPII-coated vesicles, which function in ER to Golgi transport
YGL200C	R.C]FFEDLSK.G	EMP24	2.342	523.236	-1.88	Integral membrane component of endoplasmic reticulum-derived COPII-coated vesicles, which function in ER to Golgi transport
YGL201C	K.YTEPTFC@PNPSCE#NR.A	MCM6	2.511	936.389	0.77	Protein involved in DNA replication; component of the Mcm2-7 hexameric complex that binds chromatin as a part of the pre-replicative complex
YGL202W	R.D]CAIDALYK.Y	ARO8	3.155	534.755	0.09	Aromatic aminotransferase I, expression is regulated by general control of amino acid biosynthesis
YGL203C	K.GTADC@LNMYNFNLK.D	KEX1	4.111	838.874	-0.08	Protease involved in the processing of killer toxin and alpha factor precursor; cleaves Lys and Arg residues from the C-terminus of peptides and proteins
YGL206C	K.ENDQYDTLDVGHYCE#K.R	CHC1	2.225	662.611	0.12	Clathrin heavy chain, subunit of the major coat protein involved in intracellular protein transport and endocytosis; two heavy chains form the clathrin triskelion structural component; the light chain (CLC1) is thought to regulate function
YGL206C	K.FLKENDQYDTLDVGHYC@EK.R	CHC1	3.993	792.028	1.36	Clathrin heavy chain, subunit of the major coat protein involved in intracellular protein transport and endocytosis; two heavy chains form the clathrin triskelion structural component; the light chain (CLC1) is thought to regulate function
YGL206C	K.LVNDAC@IEK.K	CHC1	2.542	531.269	0.24	Clathrin heavy chain, subunit of the major coat protein involved in intracellular protein transport and endocytosis; two heavy chains form the clathrin triskelion structural component; the light chain (CLC1) is thought to regulate function
YGL206C	R.LC@YSAVSNYSK.L	CHC1	3.556	646.303	-0.2	Clathrin heavy chain, subunit of the major coat protein involved in intracellular protein transport and endocytosis; two heavy chains form the clathrin triskelion structural component; the light chain (CLC1) is thought to regulate function
YGL207W	K.QLSPDLSALC@PPNYK.F	SPT16	3.017	851.927	-0.16	Subunit of the heterodimeric FACT complex (Spt16p-Pob3p), facilitates RNA Polymerase II transcription elongation through nucleosomes by destabilizing and then reassembling nucleosome structure
YGL207W	R.STNDQLYGNGC@ILASC@GIR.Y	SPT16	4.546	1049.99	-0.52	Subunit of the heterodimeric FACT complex (Spt16p-Pob3p), facilitates RNA Polymerase II transcription elongation through nucleosomes by destabilizing and then reassembling nucleosome structure
YGL208W	R.EKPSNAQGCE#PQEMDAVSK.K	SIP2	2.903	702.314	0.44	One of three beta subunits of the Snf1 serine/threonine protein kinase complex involved in the response to glucose starvation; null mutants exhibit accelerated aging; N-myristoylprotein localized to the cytoplasm and the plasma membrane
YGL211W	K.VSQLCE#LC@HSR.K	NCS6	2.807	463.552	-0.33	Protein required for thiolation of the uridine at the wobble position of Gln, Lys, and Glu tRNAs; has a role in urmylation and in invasive and pseudohyphal growth; inhibits replication of Brome mosaic virus in S. cerevisiae
YGL212W	K.EC@DDIGTANIAQDR.G	VAM7	4.089	789.347	0.86	Component of the vacuole SNARE complex involved in vacuolar morphogenesis; SNAP-25 homolog; functions with a syntaxin homolog Vam3p in vacuolar protein trafficking
YGL213C	R.SGMGADLNESLC@C@VC@LDR.S	SKI8	3.844	1028.93	-2.11	Protein involved in exosome mediated 3' to 5' mRNA degradation and translation inhibition of non-poly(A) mRNAs as well as double-strand break formation during meiotic recombination; required for repressing propagation of dsRNA viruses
YGL220W	K.C@YTEEEWSK.I	FRA2	3.336	616.25	-0.66	Protein involved in negative regulation of transcription of iron regulon; forms an iron independent complex with Fra2p, Grx3p, and Grx4p; null mutant fails to repress iron regulon and is sensitive to nickel
YGL221C	K.LIQYGISVYC@PHTAVDAAR.G	NIF3	3.424	1067.54	0.78	Protein of unknown function, similar to Listeria monocytogenes major sigma factor (rpoD gene product); the authentic, non-tagged protein is detected in highly purified mitochondria in high-throughput studies
YGL221C	K.SWDNTGLLIDC@STAQVTTADANAK.T	NIF3	4.026	851.404	1.9	Protein of unknown function, similar to Listeria monocytogenes major sigma factor (rpoD gene product); the authentic, non-tagged protein is detected in highly purified mitochondria in high-throughput studies
YGL221C	K.VAVC@AGSGSGVFK.Q	NIF3	2.148	619.813	-0.52	Protein of unknown function, similar to Listeria monocytogenes major sigma factor (rpoD gene product); the authentic, non-tagged protein is detected in highly purified mitochondria in high-throughput studies
YGL228W	K.ISLAINDIECVEGIDSE#TGKK.I	SHE10	2.183	764.386	-0.12	Putative glycosylphosphatidylinositol (GPI)-anchored protein of unknown function; overexpression causes growth arrest
YGL228W	R.TQTLC@HYTNPR.V	SHE10	3.212	695.83	0.14	Putative glycosylphosphatidylinositol (GPI)-anchored protein of unknown function; overexpression causes growth arrest
YGL232W	K.FKVSSGFLDPGTSGIYATCSR[.R	TAN1	3.497	750.7	-0.83	Putative tRNA acetyltransferase, RNA-binding protein required for the formation of the modified nucleoside N(4)-acetylcytidine in serine and leucine tRNAs but not required for the same modification in 18S rRNA
YGL232W	K.LTPITYSCNAK[.M	TAN1	2.506	634.321	-0.66	Putative tRNA acetyltransferase, RNA-binding protein required for the formation of the modified nucleoside N(4)-acetylcytidine in serine and leucine tRNAs but not required for the same modification in 18S rRNA
YGL232W	K.VSSGFLDPGTSGIYATC@SR.R	TAN1	3.005	987.966	0.74	Putative tRNA acetyltransferase, RNA-binding protein required for the formation of the modified nucleoside N(4)-acetylcytidine in serine and leucine tRNAs but not required for the same modification in 18S rRNA
YGL234W	K.DAPGC@VIENGTK.L	ADE5	2.684	630.798	-0.41	Bifunctional enzyme of the 'de novo' purine nucleotide biosynthetic pathway, contains aminoimidazole ribotide synthetase and glycinamide ribotide synthetase activities
YGL234W	K.DAPGC@VIENGTKLY.-	ADE5	3.445	768.872	0.21	Bifunctional enzyme of the 'de novo' purine nucleotide biosynthetic pathway, contains aminoimidazole ribotide synthetase and glycinamide ribotide synthetase activities
YGL234W	K.IIQHVALPWDAPC@PWDESK.T	ADE5	3.694	754.705	-0.07	Bifunctional enzyme of the 'de novo' purine nucleotide biosynthetic pathway, contains aminoimidazole ribotide synthetase and glycinamide ribotide synthetase activities
YGL244W	K.FC@FYPGFEDAVK.G	RTF1	2.82	740.335	0.99	Subunit of the RNA polymerase II-associated Paf1 complex; directly or indirectly regulates DNA-binding properties of Spt15p and relative activities of different TATA elements; involved in telomere maintenance
YGL245W	K.YSAADVAC@WGALR.S	GUS1	4.577	720.34	-0.09	Glutamyl-tRNA synthetase (GluRS), forms a complex with methionyl-tRNA synthetase (Mes1p) and Arc1p; complex formation increases the catalytic efficiency of both tRNA synthetases and ensures their correct localization to the cytoplasm
YGL245W	R.SNGMC@GSIIK.N	GUS1	2.42	541.752	-0.52	Glutamyl-tRNA synthetase (GluRS), forms a complex with methionyl-tRNA synthetase (Mes1p) and Arc1p; complex formation increases the catalytic efficiency of both tRNA synthetases and ensures their correct localization to the cytoplasm
YGL252C	R.NLC@GIVDIGSNGIR.F	RTG2	3.555	744.386	0.87	Sensor of mitochondrial dysfunction; regulates the subcellular location of Rtg1p and Rtg3p, transcriptional activators of the retrograde (RTG) and TOR pathways; Rtg2p is inhibited by the phosphorylated form of Mks1p
YGL253W	K.LSDDIPPSAPMAINC@EYGSFDNEHVVLPR.T	HXK2	2.497	1081.84	-1.07	Hexokinase isoenzyme 2 that catalyzes phosphorylation of glucose in the cytosol; predominant hexokinase during growth on glucose; functions in the nucleus to repress expression of HXK1 and GLK1 and to induce expression of its own gene
YGL253W	K.LSDDIPPSAPMAINCE#YGSFDNEHVVLPR.T	HXK2	2.885	1087.17	-0.03	Hexokinase isoenzyme 2 that catalyzes phosphorylation of glucose in the cytosol; predominant hexokinase during growth on glucose; functions in the nucleus to repress expression of HXK1 and GLK1 and to induce expression of its own gene
YGL253W	K.MGVIFGTGVNGAYYDVC@SDIEK.L	HXK2	5.452	804.368	0.32	Hexokinase isoenzyme 2 that catalyzes phosphorylation of glucose in the cytosol; predominant hexokinase during growth on glucose; functions in the nucleus to repress expression of HXK1 and GLK1 and to induce expression of its own gene
YGL253W	R.LSVC@GIAAICQK.R	HXK2	3.399	631.834	1.06	Hexokinase isoenzyme 2 that catalyzes phosphorylation of glucose in the cytosol; predominant hexokinase during growth on glucose; functions in the nucleus to repress expression of HXK1 and GLK1 and to induce expression of its own gene
YGR001C	R.C@YANFEC@SSWK.F	YGR001C	3.062	726.291	1.44	Putative protein of unknown function with similarity to methyltransferase family members; green fluorescent protein (GFP)-fusion protein localizes to the cytoplasm; required for replication of Brome mosaic virus in S. cerevisiae
YGR001C	R.CY#ANFEC@SSWK.F	YGR001C	3.022	726.29	0.36	Putative protein of unknown function with similarity to methyltransferase family members; green fluorescent protein (GFP)-fusion protein localizes to the cytoplasm; required for replication of Brome mosaic virus in S. cerevisiae
YGR001C	R.LISC@TGER.M	YGR001C	2.451	468.234	-0.05	Putative protein of unknown function with similarity to methyltransferase family members; green fluorescent protein (GFP)-fusion protein localizes to the cytoplasm; required for replication of Brome mosaic virus in S. cerevisiae
YGR001C	R.LLIDPPFLNEDC@QTK.S	YGR001C	3.416	901.953	-0.43	Putative protein of unknown function with similarity to methyltransferase family members; green fluorescent protein (GFP)-fusion protein localizes to the cytoplasm; required for replication of Brome mosaic virus in S. cerevisiae
YGR010W	R.MC@ELAC@ER.T	NMA2	2.306	542.715	-0.03	Nicotinic acid mononucleotide adenylyltransferase, involved in de novo and salvage synthesis of NAD(+)
YGR012W	K.GNIDAFIAGC@GTGGTITGVAK.F	YGR012W	3.118	990.496	-0.79	Putative cysteine synthase, localized to the mitochondrial outer membrane
YGR012W	K.LELC@NPAGSAK.D	YGR012W	2.499	580.293	0.61	Putative cysteine synthase, localized to the mitochondrial outer membrane
YGR017W	K.TDGKDEDLWEEQEVC@P.-	YGR017W	3.116	975.406	-1.01	Putative protein of unknown function; green fluorescent protein (GFP)-fusion protein localizes to both the nucleus and the cytoplasm
YGR019W	K.LNGC@NVGGC@AVHAVR.L	UGA1	2.575	528.589	-0.31	Gamma-aminobutyrate (GABA) transaminase (4-aminobutyrate aminotransferase) involved in the 4-aminobutyrate and glutamate degradation pathways; required for normal oxidative stress tolerance and nitrogen utilization
YGR019W	R.QFNTWC@GEPAR.M	UGA1	2.594	683.304	0.31	Gamma-aminobutyrate (GABA) transaminase (4-aminobutyrate aminotransferase) involved in the 4-aminobutyrate and glutamate degradation pathways; required for normal oxidative stress tolerance and nitrogen utilization
YGR030C	R.DLDISSSTQC@LR.F	POP6	3.511	697.833	-0.04	Subunit of both RNase MRP, which cleaves pre-rRNA, and nuclear RNase P, which cleaves tRNA precursors to generate mature 5' ends
YGR032W	K.HC@EYYQC@GK.G	GSC2	2.598	622.745	-0.27	Catalytic subunit of 1,3-beta-glucan synthase, involved in formation of the inner layer of the spore wall; activity positively regulated by Rho1p and negatively by Smk1p; has similarity to an alternate catalytic subunit, Fks1p (Gsc1p)
YGR032W	R.IKHC@EYYQCGK#.G	GSC2	3.411	495.892	-0.05	Catalytic subunit of 1,3-beta-glucan synthase, involved in formation of the inner layer of the spore wall; activity positively regulated by Rho1p and negatively by Smk1p; has similarity to an alternate catalytic subunit, Fks1p (Gsc1p)
YGR054W	K.C]VSKFDATNTSVCK[.W	YGR054W	3.197	539.585	-0.25	Eukaryotic initiation factor (eIF) 2A; associates specifically with both 40S subunits and 80 S ribosomes, and interacts genetically with both eIF5b and eIF4E; homologous to mammalian eIF2A
YGR054W	K.DC@VSEDIVPAYEYQAK.S	YGR054W	4.553	943.928	0.49	Eukaryotic initiation factor (eIF) 2A; associates specifically with both 40S subunits and 80 S ribosomes, and interacts genetically with both eIF5b and eIF4E; homologous to mammalian eIF2A
YGR054W	K.DFPVISSVLSPC@GR.F	YGR054W	3.355	767.391	0.76	Eukaryotic initiation factor (eIF) 2A; associates specifically with both 40S subunits and 80 S ribosomes, and interacts genetically with both eIF5b and eIF4E; homologous to mammalian eIF2A
YGR054W	K.FDATNTSVC@K.W	YGR054W	3.511	571.76	-1.29	Eukaryotic initiation factor (eIF) 2A; associates specifically with both 40S subunits and 80 S ribosomes, and interacts genetically with both eIF5b and eIF4E; homologous to mammalian eIF2A
YGR054W	K.VFTGPC@LDNVLLTMK.L	YGR054W	4.424	862.441	-0.27	Eukaryotic initiation factor (eIF) 2A; associates specifically with both 40S subunits and 80 S ribosomes, and interacts genetically with both eIF5b and eIF4E; homologous to mammalian eIF2A
YGR059W	K.W]GAVDIE#NEKYCD#FKILQK.T	SPR3	2.019	618.308	1.32	Sporulation-specific homolog of the yeast CDC3/10/11/12 family of bud neck microfilament genes; septin protein involved in sporulation; regulated by ABFI
YGR060W	K.EQLYC@LK.S	ERG25	1.96	477.242	-0.17	C-4 methyl sterol oxidase, catalyzes the first of three steps required to remove two C-4 methyl groups from an intermediate in ergosterol biosynthesis; mutants accumulate the sterol intermediate 4,4-dimethylzymosterol
YGR060W	R.WWDYC@LDTESGPEAK.A	ERG25	4.685	928.891	-2.43	C-4 methyl sterol oxidase, catalyzes the first of three steps required to remove two C-4 methyl groups from an intermediate in ergosterol biosynthesis; mutants accumulate the sterol intermediate 4,4-dimethylzymosterol
YGR061C	K.ATNIAHVC@GLQDK.V	ADE6	3.39	476.242	0.19	Formylglycinamidine-ribonucleotide (FGAM)-synthetase, catalyzes a step in the 'de novo' purine nucleotide biosynthetic pathway
YGR061C	R.LKDIIPGCE#NWPSFER.N	ADE6	2.318	654.324	0.14	Formylglycinamidine-ribonucleotide (FGAM)-synthetase, catalyzes a step in the 'de novo' purine nucleotide biosynthetic pathway
YGR061C	R.QDTFAFGAC@NGC@QFLSR.L	ADE6	4.65	989.93	0.01	Formylglycinamidine-ribonucleotide (FGAM)-synthetase, catalyzes a step in the 'de novo' purine nucleotide biosynthetic pathway
YGR061C	R.S]CYIHYVNGIAQNLSEQDTK.L	ADE6	4.039	1170.55	0.7	Formylglycinamidine-ribonucleotide (FGAM)-synthetase, catalyzes a step in the 'de novo' purine nucleotide biosynthetic pathway
YGR061C	R.SCYIH#YVNGIAQNLSEQDTK.L	ADE6	3.774	1170.55	0.7	Formylglycinamidine-ribonucleotide (FGAM)-synthetase, catalyzes a step in the 'de novo' purine nucleotide biosynthetic pathway
YGR061C	R.VC@MVQISQEK.D	ADE6	3.273	619.299	-0.22	Formylglycinamidine-ribonucleotide (FGAM)-synthetase, catalyzes a step in the 'de novo' purine nucleotide biosynthetic pathway
YGR080W	R.QGDSSFFIYSC@PSGSK.V	TWF1	3.909	883.888	-0.02	Twinfilin, highly conserved actin monomer-sequestering protein involved in regulation of the cortical actin cytoskeleton, composed of two cofilin-like regions, localizes actin monomers to sites of rapid filament assembly
YGR083C	R.NIPVLVC@C@ESLK.F	GCD2	2.687	716.37	-0.18	Delta subunit of the translation initiation factor eIF2B, the guanine-nucleotide exchange factor for eIF2; activity subsequently regulated by phosphorylated eIF2; first identified as a negative regulator of GCN4 expression
YGR085C	R.C@KGTVGNSHK.T	RPL11B	1.685	544.269	-0.19	Protein component of the large (60S) ribosomal subunit, nearly identical to Rpl11Ap; involved in ribosomal assembly; depletion causes degradation of proteins and RNA of the 60S subunit; has similarity to E. coli L5 and rat L11
YGR088W	K.C@PGLVR.F	CTT1	1.595	351.192	0.18	Cytosolic catalase T, has a role in protection from oxidative damage by hydrogen peroxide
YGR088W	K.FNC@YVQTMTPEQATK.F	CTT1	4.057	917.41	-0.87	Cytosolic catalase T, has a role in protection from oxidative damage by hydrogen peroxide
YGR088W	K.GDSQYTAEQC@PFK.A	CTT1	3.449	765.83	0.27	Cytosolic catalase T, has a role in protection from oxidative damage by hydrogen peroxide
YGR088W	K.LFVHNVVC@H#ACK.I	CTT1	2.765	495.248	-0.41	Cytosolic catalase T, has a role in protection from oxidative damage by hydrogen peroxide
YGR088W	R.NLGCPYSKGD#SQYTAEQC@PFK.A	CTT1	3.221	817.362	-1.02	Cytosolic catalase T, has a role in protection from oxidative damage by hydrogen peroxide
YGR094W	K.NLYVGQEDNEMTIPTC@SR.S	VAS1	3.396	1071.97	-0.38	Mitochondrial and cytoplasmic valyl-tRNA synthetase
YGR094W	K.NLYVGQEDNEMTIPTCSR[.S	VAS1	3.093	714.986	-0.04	Mitochondrial and cytoplasmic valyl-tRNA synthetase
YGR103W	K.IC@NQWLAYVAK.E	NOP7	3.446	683.354	2.06	Nucleolar protein involved in rRNA processing and 60S ribosomal subunit biogenesis; constituent of several different pre-ribosomal particles; required for exit from G<sub>0</sub> and the initiation of cell proliferation
YGR111W	K.FSQVVSSC@ETLNR.I	YGR111W	3.808	763.866	-1.61	Putative protein of unknown function; green fluorescent protein (GFP)-fusion protein localizes to both the cytoplasm and the nucleus
YGR116W	R.FWHNDIIC@TTNSEVEC@VVNAQR.H	SPT6	3.37	898.08	0.6	Transcription elongation factor required for the maintenance of chromatin structure during transcription in order to inhibit transcription from promoters within the coding region
YGR118W	K.VTAFVPND#GCLNFVDENDEVLLAGFGR.K	RPS23A	3.758	990.142	-0.77	Ribosomal protein 28 (rp28) of the small (40S) ribosomal subunit, required for translational accuracy; nearly identical to Rps23Bp and similar to E. coli S12 and rat S23 ribosomal proteins; deletion of both RPS23A and RPS23B is lethal
YGR118W	K.VTAFVPND#GCLNFVDENDEVLLAGFGRK.G	RPS23A	4.025	774.883	0.47	Ribosomal protein 28 (rp28) of the small (40S) ribosomal subunit, required for translational accuracy; nearly identical to Rps23Bp and similar to E. coli S12 and rat S23 ribosomal proteins; deletion of both RPS23A and RPS23B is lethal
YGR118W	K.VTAFVPNDGC@LNFVDENDEVLLAGFGR.K	RPS23A	3.078	990.142	-0.77	Ribosomal protein 28 (rp28) of the small (40S) ribosomal subunit, required for translational accuracy; nearly identical to Rps23Bp and similar to E. coli S12 and rat S23 ribosomal proteins; deletion of both RPS23A and RPS23B is lethal
YGR123C	K.ALLTC@DR.F	PPT1	1.63	424.718	-0.22	Protein serine/threonine phosphatase with similarity to human phosphatase PP5; present in both the nucleus and cytoplasm; expressed during logarithmic growth; computational analyses suggest roles in phosphate metabolism and rRNA processing
YGR123C	K.IYGFED#ECK.Y	PPT1	2.366	580.75	-0.01	Protein serine/threonine phosphatase with similarity to human phosphatase PP5; present in both the nucleus and cytoplasm; expressed during logarithmic growth; computational analyses suggest roles in phosphate metabolism and rRNA processing
YGR124W	K.ADWGC@AEDPSGR.Y	ASN2	3.065	660.767	-0.17	Asparagine synthetase, isozyme of Asn1p; catalyzes the synthesis of L-asparagine from L-aspartate in the asparagine biosynthetic pathway
YGR124W	K.ADWGCAEDPSGR.Y	ASN2	3.361	632.257	-0.09	Asparagine synthetase, isozyme of Asn1p; catalyzes the synthesis of L-asparagine from L-aspartate in the asparagine biosynthetic pathway
YGR124W	K.NLHLADC@LR.A	ASN2	2.25	556.287	-0.43	Asparagine synthetase, isozyme of Asn1p; catalyzes the synthesis of L-asparagine from L-aspartate in the asparagine biosynthetic pathway
YGR128C	K.C@NDVSGDSSVPVLHC@NEVIEK.L	UTP8	3.571	786.695	-0.21	Nucleolar protein required for export of tRNAs from the nucleus; also copurifies with the small subunit (SSU) processome containing the U3 snoRNA that is involved in processing of pre-18S rRNA
YGR143W	K.NILTGGC@SSSK.F	SKN1	2.506	562.274	0.27	Protein involved in sphingolipid biosynthesis; type II membrane protein with similarity to Kre6p
YGR159C	K.EIDGRPINC@DMSTSKPAGNNDR.A	NSR1	2.161	612.531	0.04	Nucleolar protein that binds nuclear localization sequences, required for pre-rRNA processing and ribosome biogenesis
YGR165W	R.LLQPFPSNPHC@K.T	MRPS35	2.061	479.915	0.13	Mitochondrial ribosomal protein of the small subunit
YGR171C	K.IQC@ASESNGFDQPK.K	MSM1	2.281	790.853	-0.85	Mitochondrial methionyl-tRNA synthetase (MetRS), functions as a monomer in mitochondrial protein synthesis; functions similarly to cytoplasmic MetRS although the cytoplasmic form contains a zinc-binding domain not found in Msm1p
YGR175C	R.ILC@AYNSPK.V	ERG1	2.922	533.274	0.03	Squalene epoxidase, catalyzes the epoxidation of squalene to 2,3-oxidosqualene; plays an essential role in the ergosterol-biosynthesis pathway and is the specific target of the antifungal drug terbinafine
YGR181W	K.ISENC@FEK.C	TIM13	2.623	513.732	-0.16	Mitochondrial intermembrane space protein, forms a complex with TIm8p that mediates import and insertion of a subset of polytopic inner membrane proteins; may prevent aggregation of incoming proteins in a chaperone-like manner
YGR181W	K.ISENCFEK#C@LTSPYATR.N	TIM13	3.43	692.656	0.53	Mitochondrial intermembrane space protein, forms a complex with TIm8p that mediates import and insertion of a subset of polytopic inner membrane proteins; may prevent aggregation of incoming proteins in a chaperone-like manner
YGR181W	R.NDAC@IDQC@LAK.Y	TIM13	3.691	654.289	-0.18	Mitochondrial intermembrane space protein, forms a complex with TIm8p that mediates import and insertion of a subset of polytopic inner membrane proteins; may prevent aggregation of incoming proteins in a chaperone-like manner
YGR187C	K.NVENEDIGELC@YR.I	HGH1	3.055	805.86	0.2	Nonessential protein of unknown function; green fluorescent protein (GFP)-fusion protein localizes to the cytoplasm; similar to mammalian BRP16 (Brain protein 16)
YGR187C	R.AMDC@LMDC@FVK.G	HGH1	2.577	703.285	0.08	Nonessential protein of unknown function; green fluorescent protein (GFP)-fusion protein localizes to the cytoplasm; similar to mammalian BRP16 (Brain protein 16)
YGR192C	K.IVSNASC@TTNC@LAPLAK.V	TDH3	2.458	607.306	-0.24	Glyceraldehyde-3-phosphate dehydrogenase, isozyme 3, involved in glycolysis and gluconeogenesis; tetramer that catalyzes the reaction of glyceraldehyde-3-phosphate to 1,3 bis-phosphoglycerate; detected in the cytoplasm and cell-wall
YGR192C	K.IVSNASC@TTNC@LAPLAK[.V	TDH3	4.483	938.964	-2.19	Glyceraldehyde-3-phosphate dehydrogenase, isozyme 3, involved in glycolysis and gluconeogenesis; tetramer that catalyzes the reaction of glyceraldehyde-3-phosphate to 1,3 bis-phosphoglycerate; detected in the cytoplasm and cell-wall
YGR192C	K.IVSNASC@TTNCLAPLAK.V	TDH3	4.129	881.945	-0.01	Glyceraldehyde-3-phosphate dehydrogenase, isozyme 3, involved in glycolysis and gluconeogenesis; tetramer that catalyzes the reaction of glyceraldehyde-3-phosphate to 1,3 bis-phosphoglycerate; detected in the cytoplasm and cell-wall
YGR192C	K.IVSNASCTTNC@LAPLAK.V	TDH3	3.334	881.944	-1.12	Glyceraldehyde-3-phosphate dehydrogenase, isozyme 3, involved in glycolysis and gluconeogenesis; tetramer that catalyzes the reaction of glyceraldehyde-3-phosphate to 1,3 bis-phosphoglycerate; detected in the cytoplasm and cell-wall
YGR192C	K.IVSNASCTTNCLAPLAK.V	TDH3	3.45	853.434	-0.01	Glyceraldehyde-3-phosphate dehydrogenase, isozyme 3, involved in glycolysis and gluconeogenesis; tetramer that catalyzes the reaction of glyceraldehyde-3-phosphate to 1,3 bis-phosphoglycerate; detected in the cytoplasm and cell-wall
YGR192C	K.YTSDLKIVSNASC@TTNC@LAPLAK.V	TDH3	3.183	843.089	-0.02	Glyceraldehyde-3-phosphate dehydrogenase, isozyme 3, involved in glycolysis and gluconeogenesis; tetramer that catalyzes the reaction of glyceraldehyde-3-phosphate to 1,3 bis-phosphoglycerate; detected in the cytoplasm and cell-wall
YGR194C	K.C@LAINQDLK.I	XKS1	2.314	537.784	-0.17	Xylulokinase, converts D-xylulose and ATP to xylulose 5-phosphate and ADP; rate limiting step in fermentation of xylulose; required for xylose fermentation by recombinant S. cerevisiae strains
YGR194C	K.NIVESQALSC@R.V	XKS1	3.988	638.82	0.63	Xylulokinase, converts D-xylulose and ATP to xylulose 5-phosphate and ADP; rate limiting step in fermentation of xylulose; required for xylose fermentation by recombinant S. cerevisiae strains
YGR194C	K.NLIAGTIC@K.Y	XKS1	2.65	495.276	0.46	Xylulokinase, converts D-xylulose and ATP to xylulose 5-phosphate and ADP; rate limiting step in fermentation of xylulose; required for xylose fermentation by recombinant S. cerevisiae strains
YGR194C	R.LETPNSC@ALGGCY#K.A	XKS1	2.958	785.355	-0.34	Xylulokinase, converts D-xylulose and ATP to xylulose 5-phosphate and ADP; rate limiting step in fermentation of xylulose; required for xylose fermentation by recombinant S. cerevisiae strains
YGR199W	K.ANASDIQDEQLDC@FEQLEEK.H	PMT6	4.31	794.683	-2.34	Protein O-mannosyltransferase, transfers mannose from dolichyl phosphate-D-mannose to protein serine/threonine residues of secretory proteins; reaction is essential for cell wall rigidity; member of a family of mannosyltransferases
YGR200C	K.GHEAEVTC@VR.F	ELP2	2.761	579.272	0.04	Subunit of Elongator complex, which is required for modification of wobble nucleosides in tRNA; target of Kluyveromyces lactis zymocin
YGR200C	K.LIASAC@R.S	ELP2	2.04	395.716	-0.14	Subunit of Elongator complex, which is required for modification of wobble nucleosides in tRNA; target of Kluyveromyces lactis zymocin
YGR200C	K.LYGHGFEITC@LDISPDQK.L	ELP2	3.045	698.339	0.38	Subunit of Elongator complex, which is required for modification of wobble nucleosides in tRNA; target of Kluyveromyces lactis zymocin
YGR204W	K.C]VGDVEFNEAIK.Y	ADE3	4.287	690.827	0.24	Cytoplasmic trifunctional enzyme C1-tetrahydrofolate synthase, involved in single carbon metabolism and required for biosynthesis of purines, thymidylate, methionine, and histidine
YGR204W	K.EQGFGNLPIC@IAK.T	ADE3	3.339	723.874	0.14	Cytoplasmic trifunctional enzyme C1-tetrahydrofolate synthase, involved in single carbon metabolism and required for biosynthesis of purines, thymidylate, methionine, and histidine
YGR204W	K.IDMYKEQGFGNLPIC@IAK.T	ADE3	3.909	705.019	-1.67	Cytoplasmic trifunctional enzyme C1-tetrahydrofolate synthase, involved in single carbon metabolism and required for biosynthesis of purines, thymidylate, methionine, and histidine
YGR204W	K.KNGHPFFLPCTPK[.G	ADE3	3.256	514.935	0.28	Cytoplasmic trifunctional enzyme C1-tetrahydrofolate synthase, involved in single carbon metabolism and required for biosynthesis of purines, thymidylate, methionine, and histidine
YGR207C	K.GIDTC@SLIDSVGK.E	YGR207C	3.222	682.84	-0.08	Protein that interacts with frataxin (Yfh1p); putative homolog of mammalian electron transfer flavoprotein complex subunit ETF-beta; authentic, non-tagged protein is detected in highly purified mitochondria in high-throughput studies
YGR207C	K.GIDTC@SLIDSVGKENIEPLAIAK.I	YGR207C	2.67	815.097	0.11	Protein that interacts with frataxin (Yfh1p); putative homolog of mammalian electron transfer flavoprotein complex subunit ETF-beta; authentic, non-tagged protein is detected in highly purified mitochondria in high-throughput studies
YGR208W	K.TLGPIVDGQC@K.S	SER2	2.599	594.308	-0.02	Phosphoserine phosphatase of the phosphoglycerate pathway, involved in serine and glycine biosynthesis, expression is regulated by the available nitrogen source
YGR210C	R.FGKEDLC@KPNYGWC@SK.G	YGR210C	3.964	497.98	0.25	Putative protein of unknown function; green fluorescent protein (GFP)-fusion protein localizes to the cytoplasm
YGR218W	K.C@LTEVSNLKIPQDNDLIKR.Q	CRM1	2.833	564.806	-0.32	Major karyopherin, involved in export of proteins, RNAs, and ribosomal subunits from the nucleus
YGR218W	K.C]LTEVSNLK.I	CRM1	3.069	532.276	-0.01	Major karyopherin, involved in export of proteins, RNAs, and ribosomal subunits from the nucleus
YGR218W	K.C]LTEVSNLKIPQDNDLIKR.Q	CRM1	3.043	752.739	0.28	Major karyopherin, involved in export of proteins, RNAs, and ribosomal subunits from the nucleus
YGR231C	K.DLQMVNITC@R.V	PHB2	3.738	633.303	0.11	Subunit of the prohibitin complex (Phb1p-Phb2p), a 1.2 MDa ring-shaped inner mitochondrial membrane chaperone that stabilizes newly synthesized proteins; determinant of replicative life span; involved in mitochondrial segregation
YGR231C	K.DLQMVNITCR[.V	PHB2	2.346	625.305	0.74	Subunit of the prohibitin complex (Phb1p-Phb2p), a 1.2 MDa ring-shaped inner mitochondrial membrane chaperone that stabilizes newly synthesized proteins; determinant of replicative life span; involved in mitochondrial segregation
YGR233C	K.FVGDTPNCLK#.E	PHO81	2.392	575.781	-0.5	Cyclin-dependent kinase (CDK) inhibitor, regulates Pho80p-Pho85p and Pcl7p-Pho85p cyclin-CDK complexes in response to phosphate levels; inhibitory activity for Pho80p-Pho85p requires myo-D-inositol heptakisphosphate (IP7) generated by Vip1p
YGR233C	K.NVFHEAASC@PEK.S	PHO81	2.601	694.817	-0.28	Cyclin-dependent kinase (CDK) inhibitor, regulates Pho80p-Pho85p and Pcl7p-Pho85p cyclin-CDK complexes in response to phosphate levels; inhibitory activity for Pho80p-Pho85p requires myo-D-inositol heptakisphosphate (IP7) generated by Vip1p
YGR233C	R.KNVFHEAASC@PEK.S	PHO81	2.968	506.245	-0.19	Cyclin-dependent kinase (CDK) inhibitor, regulates Pho80p-Pho85p and Pcl7p-Pho85p cyclin-CDK complexes in response to phosphate levels; inhibitory activity for Pho80p-Pho85p requires myo-D-inositol heptakisphosphate (IP7) generated by Vip1p
YGR234W	K.C]NPNRPIYWIQSSYDEK.T	YHB1	3.951	724.005	-0.34	Nitric oxide oxidoreductase, flavohemoglobin involved in nitric oxide detoxification; plays a role in the oxidative and nitrosative stress responses
YGR234W	K.HVDELLAEC@ANVDK.I	YHB1	5.373	806.885	-0.45	Nitric oxide oxidoreductase, flavohemoglobin involved in nitric oxide detoxification; plays a role in the oxidative and nitrosative stress responses
YGR234W	R.HYSLC@SASTK.N	YHB1	2.951	577.269	-0.13	Nitric oxide oxidoreductase, flavohemoglobin involved in nitric oxide detoxification; plays a role in the oxidative and nitrosative stress responses
YGR240C	-.MQSQDSC@YGVAFR.S	PFK1	4.765	782.83	-0.04	Alpha subunit of heterooctameric phosphofructokinase involved in glycolysis, indispensable for anaerobic growth, activated by fructose-2,6-bisphosphate and AMP, mutation inhibits glucose induction of cell cycle-related genes
YGR240C	R.I]CEMVDYIDATAK.S	PFK1	4.031	772.852	-0.05	Alpha subunit of heterooctameric phosphofructokinase involved in glycolysis, indispensable for anaerobic growth, activated by fructose-2,6-bisphosphate and AMP, mutation inhibits glucose induction of cell cycle-related genes
YGR240C	R.IC@EMVDYIDATAK.S	PFK1	3.807	764.855	0.04	Alpha subunit of heterooctameric phosphofructokinase involved in glycolysis, indispensable for anaerobic growth, activated by fructose-2,6-bisphosphate and AMP, mutation inhibits glucose induction of cell cycle-related genes
YGR244C	K.LNGGDPANFLDC@GGGATPETIK.Q	LSC2	4.511	735.348	0.28	Beta subunit of succinyl-CoA ligase, which is a mitochondrial enzyme of the TCA cycle that catalyzes the nucleotide-dependent conversion of succinyl-CoA to succinate
YGR248W	R.IFFC@DER.L	SOL4	2.076	493.724	0.34	6-phosphogluconolactonase with similarity to Sol3p
YGR253C	K.LDENNAQLSC@ITK.Q	PUP2	4.367	753.367	-0.37	Alpha 5 subunit of the 20S proteasome involved in ubiquitin-dependent catabolism; human homolog is subunit zeta
YGR253C	K.QVMEEKLDENNAQLSC@ITK.Q	PUP2	3.159	756.028	-0.28	Alpha 5 subunit of the 20S proteasome involved in ubiquitin-dependent catabolism; human homolog is subunit zeta
YGR253C	R.H]IGCAMSGLTADAR.S	PUP2	3.58	487.231	-0.18	Alpha 5 subunit of the 20S proteasome involved in ubiquitin-dependent catabolism; human homolog is subunit zeta
YGR253C	R.HIGC@AMSGLTADAR.S	PUP2	2.246	492.562	-0.47	Alpha 5 subunit of the 20S proteasome involved in ubiquitin-dependent catabolism; human homolog is subunit zeta
YGR254W	K.IGLDC@ASSEFFK#.D	ENO1	2.494	715.834	-0.75	Enolase I, a phosphopyruvate hydratase that catalyzes the conversion of 2-phosphoglycerate to phosphoenolpyruvate during glycolysis and the reverse reaction during gluconeogenesis; expression is repressed in response to glucose
YGR254W	K.IGLDC@ASSEFFK.D	ENO1	3.622	687.323	-0.87	Enolase I, a phosphopyruvate hydratase that catalyzes the conversion of 2-phosphoglycerate to phosphoenolpyruvate during glycolysis and the reverse reaction during gluconeogenesis; expression is repressed in response to glucose
YGR254W	K.IGLDC@ASSEFFKDGK.Y	ENO1	3.351	558.6	0.07	Enolase I, a phosphopyruvate hydratase that catalyzes the conversion of 2-phosphoglycerate to phosphoenolpyruvate during glycolysis and the reverse reaction during gluconeogenesis; expression is repressed in response to glucose
YGR254W	K.IGLDCASSEFFK.D	ENO1	3.45	658.813	0.06	Enolase I, a phosphopyruvate hydratase that catalyzes the conversion of 2-phosphoglycerate to phosphoenolpyruvate during glycolysis and the reverse reaction during gluconeogenesis; expression is repressed in response to glucose
YGR255C	R.IQSYDGLYVTDGC@SK.A	COQ6	3.581	853.39	-0.78	Putative flavin-dependent monooxygenase, involved in ubiquinone (Coenzyme Q) biosynthesis; localizes to the matrix face of the mitochondrial inner membrane in a large complex with other ubiquinone biosynthetic enzymes
YGR255C	R.IQSYDGLYVTDGCSK[.A	COQ6	3.98	853.39	-0.53	Putative flavin-dependent monooxygenase, involved in ubiquinone (Coenzyme Q) biosynthesis; localizes to the matrix face of the mitochondrial inner membrane in a large complex with other ubiquinone biosynthetic enzymes
YGR264C	K.C]GALLDPFELINPR.C	MES1	2.602	807.919	-0.29	Methionyl-tRNA synthetase, forms a complex with glutamyl-tRNA synthetase (Gus1p) and Arc1p, which increases the catalytic efficiency of both tRNA synthetases; also has a role in nuclear export of tRNAs
YGR264C	K.QLYC@PVHNSYLADR.Y	MES1	3.3	579.279	0.17	Methionyl-tRNA synthetase, forms a complex with glutamyl-tRNA synthetase (Gus1p) and Arc1p, which increases the catalytic efficiency of both tRNA synthetases; also has a role in nuclear export of tRNAs
YGR264C	R.C@KLDDASPEPK.Y	MES1	3.495	630.3	-0.54	Methionyl-tRNA synthetase, forms a complex with glutamyl-tRNA synthetase (Gus1p) and Arc1p, which increases the catalytic efficiency of both tRNA synthetases; also has a role in nuclear export of tRNAs
YGR264C	R.NYNALFIC@GTDEYGTATETK.A	MES1	5.057	1134.51	0.17	Methionyl-tRNA synthetase, forms a complex with glutamyl-tRNA synthetase (Gus1p) and Arc1p, which increases the catalytic efficiency of both tRNA synthetases; also has a role in nuclear export of tRNAs
YGR267C	K.TGSSTVTSC@MLGGFR.A	FOL2	3.408	788.859	0.81	GTP-cyclohydrolase I, catalyzes the first step in the folic acid biosynthetic pathway
YGR268C	R.LGGVLC@GEC@R.G	HUA1	3.527	560.765	-0.13	Cytoplasmic protein containing a zinc finger domain with sequence similarity to that of Type I J-proteins; computational analysis of large-scale protein-protein interaction data suggests a possible role in actin patch assembly
YGR275W	R.ESC@EDILDLK.E	RTT102	2.714	611.287	0.35	Component of both the SWI/SNF and RSC chromatin remodeling complexes, suggested role in chromosome maintenance; possible weak regulator of Ty1 transposition
YGR279C	R.LYGTDC@NQVENVFK.A	SCW4	5.258	843.893	-0.25	Cell wall protein with similarity to glucanases; scw4 scw10 double mutants exhibit defects in mating
YGR282C	K.YSLDC@DFS.-	BGL2	1.489	503.695	0.16	Endo-beta-1,3-glucanase, major protein of the cell wall, involved in cell wall maintenance
YGR285C	K.RAQYDSC@DFVADVPPPK.K	ZUO1	3.348	655.645	1.15	Cytosolic ribosome-associated chaperone that acts, together with Ssz1p and the Ssb proteins, as a chaperone for nascent polypeptide chains; contains a DnaJ domain and functions as a J-protein partner for Ssb1p and Ssb2p
YGR285C	R.AQYDSC@DFVADVPPPK.K	ZUO1	4.462	904.912	0.76	Cytosolic ribosome-associated chaperone that acts, together with Ssz1p and the Ssb proteins, as a chaperone for nascent polypeptide chains; contains a DnaJ domain and functions as a J-protein partner for Ssb1p and Ssb2p
YGR285C	R.AQYDSC@DFVADVPPPKK.G	ZUO1	2.219	646.308	-0.49	Cytosolic ribosome-associated chaperone that acts, together with Ssz1p and the Ssb proteins, as a chaperone for nascent polypeptide chains; contains a DnaJ domain and functions as a J-protein partner for Ssb1p and Ssb2p
YGR286C	R.FC@LGAAWR.D	BIO2	1.939	490.742	-0.2	Biotin synthase, catalyzes the conversion of dethiobiotin to biotin, which is the last step of the biotin biosynthesis pathway; complements E. coli bioB mutant
YHL001W	K.KWAAAGVCEK[.W	RPL14B	3.303	560.284	-0.38	Protein component of the large (60S) ribosomal subunit, nearly identical to Rpl14Ap and has similarity to rat L14 ribosomal protein
YHL001W	K.WAAAGVC@EK.W	RPL14B	3.477	496.237	0.23	Protein component of the large (60S) ribosomal subunit, nearly identical to Rpl14Ap and has similarity to rat L14 ribosomal protein
YHL007C	K.LNEICSD#GDPSTK.Y	STE20	3.657	718.322	0.17	Signal transducing kinase of the PAK (p21-activated kinase) family, involved in pheromone response and pseudohyphal/invasive growth pathways, activated by Cdc42p; binds Ste4p at a GBB motif present in noncatalytic domains of PAK kinases
YHL011C	K.LDRVVC@TNTVPFEEK.I	PRS3	4.181	602.973	-0.17	5-phospho-ribosyl-1(alpha)-pyrophosphate synthetase, synthesizes PRPP, which is required for nucleotide, histidine, and tryptophan biosynthesis; one of five related enzymes, which are active as heteromultimeric complexes
YHL011C	R.VVC@TNTVPFEEK.I	PRS3	2.707	711.85	-0.39	5-phospho-ribosyl-1(alpha)-pyrophosphate synthetase, synthesizes PRPP, which is required for nucleotide, histidine, and tryptophan biosynthesis; one of five related enzymes, which are active as heteromultimeric complexes
YHL021C	K.GC@YFDSDTFK.S	YHL021C	3.063	620.253	-0.27	Putative protein of unknown function; the authentic, non-tagged protein is detected in highly purified mitochondria in high-throughput studies; null mutant displays decreased frequency of mitochondrial genome loss (petite formation)
YHL027W	R.AAPSYSSSGC@SILPPLQSK.I	RIM101	2.615	975.486	0.81	Transcriptional repressor involved in response to pH and in cell wall construction; required for alkaline pH-stimulated haploid invasive growth and sporulation; activated by proteolytic processing; similar to A. nidulans PacC
YHL027W	R.SMNVYEDGC@SNK.T	RIM101	3.431	702.28	-2.14	Transcriptional repressor involved in response to pH and in cell wall construction; required for alkaline pH-stimulated haploid invasive growth and sporulation; activated by proteolytic processing; similar to A. nidulans PacC
YHR005C	R.INLQDIC@K.D	GPA1	3.096	502.266	0.15	GTP-binding alpha subunit of the heterotrimeric G protein that couples to pheromone receptors; negatively regulates the mating pathway by sequestering G(beta)gamma and by triggering an adaptive response; activates Vps34p at the endosome
YHR005C-A	K.C]INTSYSEGE#LNKNESSCLDR.C	MRS11	2.371	826.028	-0.39	Essential protein of the mitochondrial intermembrane space, forms a complex with Tim9p (TIM10 complex) that mediates insertion of hydrophobic proteins at the inner membrane, has homology to Mrs5p, which is also involved in this process
YHR005C-A	K.C]INTSYSEGELNK.N	MRS11	2.793	757.844	0.91	Essential protein of the mitochondrial intermembrane space, forms a complex with Tim9p (TIM10 complex) that mediates insertion of hydrophobic proteins at the inner membrane, has homology to Mrs5p, which is also involved in this process
YHR005C-A	K.C]INTSYSEGELNKNESSC@LDR.C	MRS11	3.24	826.028	-0.39	Essential protein of the mitochondrial intermembrane space, forms a complex with Tim9p (TIM10 complex) that mediates insertion of hydrophobic proteins at the inner membrane, has homology to Mrs5p, which is also involved in this process
YHR007C	K.GVIYDC@PNSR.L	ERG11	2.633	590.774	0	Lanosterol 14-alpha-demethylase, catalyzes the C-14 demethylation of lanosterol to form 4,4''-dimethyl cholesta-8,14,24-triene-3-beta-ol in the ergosterol biosynthesis pathway; member of the cytochrome P450 family
YHR008C	K.FHGGGFTNH#CLFWENLAPESQGGGEPPTGALAK.A	SOD2	3.039	871.659	-0.65	Mitochondrial superoxide dismutase, protects cells against oxygen toxicity; phosphorylated
YHR009C	K.CD#ELYHYVSK.L	YHR009C	2.855	657.294	-1.26	Putative protein of unknown function; not an essential gene
YHR009C	K.D#CPISGLR.A	YHR009C	2.636	459.229	-0.09	Putative protein of unknown function; not an essential gene
YHR009C	K.DLYIASGHSC@WGINNAPATGK.L	YHR009C	3.933	744.688	0.03	Putative protein of unknown function; not an essential gene
YHR012W	K.I]GCC@SGYTVVPK.N	VPS29	3.146	670.82	-0.21	Endosomal protein that is a subunit of the membrane-associated retromer complex essential for endosome-to-Golgi retrograde transport; forms a subcomplex with Vps35p and Vps26p that selects cargo proteins for endosome-to-Golgi retrieval
YHR019C	K.YGTC@PHGGYGIGTER.I	DED81	3.485	542.244	-0.42	Cytosolic asparaginyl-tRNA synthetase, required for protein synthesis, catalyzes the specific attachment of asparagine to its cognate tRNA
YHR019C	R.C@SDDPRVTESVDVLMPNVGEITGGSMR.I	DED81	3.937	979.785	0.94	Cytosolic asparaginyl-tRNA synthetase, required for protein synthesis, catalyzes the specific attachment of asparagine to its cognate tRNA
YHR019C	R.D#CSLYPR.F	DED81	1.87	455.708	-0.12	Cytosolic asparaginyl-tRNA synthetase, required for protein synthesis, catalyzes the specific attachment of asparagine to its cognate tRNA
YHR019C	R.ILAWLCD#R.F	DED81	2.529	523.777	0.64	Cytosolic asparaginyl-tRNA synthetase, required for protein synthesis, catalyzes the specific attachment of asparagine to its cognate tRNA
YHR019C	R.KYGTC@PHGGYGIGTER.I	DED81	2.969	876.909	-0.72	Cytosolic asparaginyl-tRNA synthetase, required for protein synthesis, catalyzes the specific attachment of asparagine to its cognate tRNA
YHR019C	R.KYGTCPHGGY#GIGTER.I	DED81	2.358	876.909	-0.72	Cytosolic asparaginyl-tRNA synthetase, required for protein synthesis, catalyzes the specific attachment of asparagine to its cognate tRNA
YHR019C	R.RVYDEEHLTEVTPPC@MVQTQVEGGSTLFK.M	DED81	3.244	842.405	0.08	Cytosolic asparaginyl-tRNA synthetase, required for protein synthesis, catalyzes the specific attachment of asparagine to its cognate tRNA
YHR019C	R.VYDEEHLTEVTPPC@MVQTQVEGGSTLFK.M	DED81	2.423	1070.84	-0.22	Cytosolic asparaginyl-tRNA synthetase, required for protein synthesis, catalyzes the specific attachment of asparagine to its cognate tRNA
YHR020W	K.EKFAGGDFTTTC@EGYIPQTGR.G	YHR020W	4.092	779.028	0.96	Protein of unknown function that may interact with ribosomes, based on co-purification experiments; has similarity to proline-tRNA ligase; YHR020W is an essential gene
YHR020W	K.FAGGDFTTTCE#GYIPQTGR.G	YHR020W	3.579	1039.47	0.18	Protein of unknown function that may interact with ribosomes, based on co-purification experiments; has similarity to proline-tRNA ligase; YHR020W is an essential gene
YHR020W	K.S]LCIPFDQPVLNEGQK.C	YHR020W	4.513	922.964	-0.17	Protein of unknown function that may interact with ribosomes, based on co-purification experiments; has similarity to proline-tRNA ligase; YHR020W is an essential gene
YHR020W	R.IAVNYC@MFGR.S	YHR020W	3.454	623.789	0.18	Protein of unknown function that may interact with ribosomes, based on co-purification experiments; has similarity to proline-tRNA ligase; YHR020W is an essential gene
YHR021C	R.SYFLDVK.C	RPS27B	1.831	436.232	0.76	Protein component of the small (40S) ribosomal subunit; nearly identical to Rps27Ap and has similarity to rat S27 ribosomal protein
YHR023W	K.QQFENC@MDDLQGNELR.L	MYO1	3.326	998.929	1.12	Type II myosin heavy chain, required for wild-type cytokinesis and cell separation; localizes to the actomyosin ring; binds to myosin light chains Mlc1p and Mlc2p through its IQ1 and IQ2 motifs respectively
YHR025W	K.C@IAIIPQFELSTADSR.G	THR1	2.649	910.964	-0.37	Homoserine kinase, conserved protein required for threonine biosynthesis; expression is regulated by the GCN4-mediated general amino acid control pathway
YHR025W	R.MLDYC@LMIER.H	THR1	3.023	688.307	0.45	Homoserine kinase, conserved protein required for threonine biosynthesis; expression is regulated by the GCN4-mediated general amino acid control pathway
YHR027C	K.FLRPTYPDLC@SIYDK.W	RPN1	2.805	629.982	-0.38	Non-ATPase base subunit of the 19S regulatory particle of the 26S proteasome; may participate in the recognition of several ligands of the proteasome; contains a leucine-rich repeat (LRR) domain, a site for protein?protein interactions
YHR029C	K.NTTATSLVQEC@K.I	YHI9	3.244	676.33	-0.36	Protein of unknown function; null mutant is defective in unfolded protein response; possibly involved in a membrane regulation metabolic pathway; member of the PhzF superfamily, though most likely not involved in phenazine production
YHR030C	K.EIGHGAYGIVCSAR[.F	SLT2	3.065	497.245	-0.42	Serine/threonine MAP kinase involved in regulating the maintenance of cell wall integrity and progression through the cell cycle; regulated by the PKC1-mediated signaling pathway
YHR030C	K.IC@DFGLAR.G	SLT2	2.442	476.239	-0.52	Serine/threonine MAP kinase involved in regulating the maintenance of cell wall integrity and progression through the cell cycle; regulated by the PKC1-mediated signaling pathway
YHR037W	K.C@TGAVVSQQWFGGAR.M	PUT2	4.091	812.388	-0.93	Delta-1-pyrroline-5-carboxylate dehydrogenase, nuclear-encoded mitochondrial protein involved in utilization of proline as sole nitrogen source; deficiency of the human homolog causes HPII, an autosomal recessive inborn error of metabolism
YHR039C	K.FGGEEGLLGLC@NAK.S	MSC7	3.703	732.862	0.5	Protein of unknown function, green fluorescent protein (GFP)-fusion protein localizes to the endoplasmic reticulum; msc7 mutants are defective in directing meiotic recombination events to homologous chromatids
YHR039C	R.GTFQSSGQNC@IGIER.V	MSC7	4.157	827.389	3.04	Protein of unknown function, green fluorescent protein (GFP)-fusion protein localizes to the endoplasmic reticulum; msc7 mutants are defective in directing meiotic recombination events to homologous chromatids
YHR040W	R.LAGTSSC@IEGEDGSETKEER.T	BCD1	2.22	718.987	-0.24	Essential protein required for the accumulation of box C/D snoRNA
YHR046C	K.FLC@ELATEK.V	INM1	2.253	555.779	0.53	Inositol monophosphatase, involved in biosynthesis of inositol and in phosphoinositide second messenger signaling; INM1 expression increases in the presence of inositol and decreases upon exposure to antibipolar drugs lithium and valproate
YHR047C	R.RAFPC@FDEPNLK.A	AAP1	3.207	498.579	0.34	Arginine/alanine aminopeptidase, overproduction stimulates glycogen accumulation
YHR049W	K.ANVQC@DYIDAPVLLEK.K	FSH1	5.127	924.464	0.34	Serine hydrolase that localizes to both the nucleus and cytoplasm; sequence is similar to Fsh2p and Fsh3p
YHR049W	K.KANVQC@DYIDAPVLLEK.K	FSH1	3.632	988.512	0.13	Serine hydrolase that localizes to both the nucleus and cytoplasm; sequence is similar to Fsh2p and Fsh3p
YHR049W	K.KANVQC@DYIDAPVLLEKK.D	FSH1	2.714	526.783	0.24	Serine hydrolase that localizes to both the nucleus and cytoplasm; sequence is similar to Fsh2p and Fsh3p
YHR063C	K.C@EC@PETFSK.K	PAN5	2.718	579.234	-0.01	2-dehydropantoate 2-reductase, part of the pantothenic acid pathway, structurally homologous to E. coli panE
YHR063C	K.LADNLNLDPNCC@K#VNK.T	PAN5	2.525	629.973	-0.22	2-dehydropantoate 2-reductase, part of the pantothenic acid pathway, structurally homologous to E. coli panE
YHR064C	K.C@ANGAPAVEVDGK.V	SSZ1	3.033	644.303	-1.59	Hsp70 protein that interacts with Zuo1p (a DnaJ homolog) to form a ribosome-associated complex that binds the ribosome via the Zuo1p subunit; also involved in pleiotropic drug resistance via sequential activation of PDR1 and PDR5; binds ATP
YHR064C	R.DFIGLPFDKC@DVSK.C	SSZ1	2.305	547.604	-0.01	Hsp70 protein that interacts with Zuo1p (a DnaJ homolog) to form a ribosome-associated complex that binds the ribosome via the Zuo1p subunit; also involved in pleiotropic drug resistance via sequential activation of PDR1 and PDR5; binds ATP
YHR067W	K.AFDSLLC@R.R	HTD2	2.706	491.245	0.62	Mitochondrial 3-hydroxyacyl-thioester dehydratase involved in fatty acid biosynthesis, required for respiratory growth and for normal mitochondrial morphology
YHR068W	K.C]LAPTYLGEFALK.G	DYS1	3.582	741.887	-0.22	Deoxyhypusine synthase, catalyzes formation of deoxyhypusine, the first step in hypusine biosynthesis; triggers posttranslational hypusination of translation elongation factor eIF-5A and regulates its intracellular levels; tetrameric
YHR068W	K.GC@FDEEGYQK.T	DYS1	2.912	616.748	-0.71	Deoxyhypusine synthase, catalyzes formation of deoxyhypusine, the first step in hypusine biosynthesis; triggers posttranslational hypusination of translation elongation factor eIF-5A and regulates its intracellular levels; tetrameric
YHR068W	K.HGADC@LEANQDVDSPIWTPSK.M	DYS1	4.326	780.69	-0.16	Deoxyhypusine synthase, catalyzes formation of deoxyhypusine, the first step in hypusine biosynthesis; triggers posttranslational hypusination of translation elongation factor eIF-5A and regulates its intracellular levels; tetrameric
YHR068W	K.KGC@FDEEGYQK.T	DYS1	2.171	680.796	0.27	Deoxyhypusine synthase, catalyzes formation of deoxyhypusine, the first step in hypusine biosynthesis; triggers posttranslational hypusination of translation elongation factor eIF-5A and regulates its intracellular levels; tetrameric
YHR068W	K.KHGADC@LEANQDVDSPIWTPSK.M	DYS1	4.009	823.388	-0.34	Deoxyhypusine synthase, catalyzes formation of deoxyhypusine, the first step in hypusine biosynthesis; triggers posttranslational hypusination of translation elongation factor eIF-5A and regulates its intracellular levels; tetrameric
YHR068W	K.TMGFQASSVGTAC@EIIDSMR.S	DYS1	3.259	731.659	-0.37	Deoxyhypusine synthase, catalyzes formation of deoxyhypusine, the first step in hypusine biosynthesis; triggers posttranslational hypusination of translation elongation factor eIF-5A and regulates its intracellular levels; tetrameric
YHR072W	R.KGC@DFLVSK.Q	ERG7	2.555	527.274	0.78	Lanosterol synthase, an essential enzyme that catalyzes the cyclization of squalene 2,3-epoxide, a step in ergosterol biosynthesis
YHR074W	K.I]FHSCFMGTENSSK.E	QNS1	2.962	548.91	0.32	Glutamine-dependent NAD(+) synthetase, essential for the formation of NAD(+) from nicotinic acid adenine dinucleotide
YHR074W	K.IFHSC@FMGTENSSK.E	QNS1	2.701	554.242	0.64	Glutamine-dependent NAD(+) synthetase, essential for the formation of NAD(+) from nicotinic acid adenine dinucleotide
YHR074W	K.YDC@SSADINPIGGISK.T	QNS1	4.138	848.895	-1.42	Glutamine-dependent NAD(+) synthetase, essential for the formation of NAD(+) from nicotinic acid adenine dinucleotide
YHR074W	R.C@GGVYLYANQR.G	QNS1	3.939	650.809	0.22	Glutamine-dependent NAD(+) synthetase, essential for the formation of NAD(+) from nicotinic acid adenine dinucleotide
YHR074W	R.FDPTVC@PTK.V	QNS1	2.136	532.758	-0.21	Glutamine-dependent NAD(+) synthetase, essential for the formation of NAD(+) from nicotinic acid adenine dinucleotide
YHR086W	K.NNQGYC@FVDFPSSTHAANALLK.N	NAM8	2.917	818.722	-0.21	RNA binding protein, component of the U1 snRNP protein; mutants are defective in meiotic recombination and in formation of viable spores, involved in the formation of DSBs through meiosis-specific splicing of MER2 pre-mRNA
YHR089C	K.C@GDGVQATSFK.E	GAR1	4.206	585.266	-0.75	Protein component of the H/ACA snoRNP pseudouridylase complex, involved in the modification and cleavage of the 18S pre-rRNA
YHR089C	K.C@GDGVQATSFKEGDK.F	GAR1	2.61	533.575	0.09	Protein component of the H/ACA snoRNP pseudouridylase complex, involved in the modification and cleavage of the 18S pre-rRNA
YHR089C	R.SFQQGPPDTVLEMGAFLHPCE#GDIVCR[.S	GAR1	3.412	1026.14	-0.98	Protein component of the H/ACA snoRNP pseudouridylase complex, involved in the modification and cleavage of the 18S pre-rRNA
YHR098C	K.YDSLNSAQLC@YK.L	SFB3	3.358	731.339	1.95	Member of the Sec24p family; forms a complex, with Sec23p, that is involved in sorting of Pma1p into COPII vesicles; peripheral ER membrane protein; potential Cdc28p substrate
YHR103W	K.SQTC@SSTGYNNSSILK.T	SBE22	3.687	873.901	-0.44	Protein involved in the transport of cell wall components from the Golgi to the cell surface; similar in structure and functionally redundant with Sbe2p; involved in bud growth
YHR104W	K.KVC@ANQIYEAIK.L	GRE3	3.258	718.882	-0.01	Aldose reductase involved in methylglyoxal, d-xylose and arabinose metabolism; stress induced (osmotic, ionic, oxidative, heat shock, starvation and heavy metals); regulated by the HOG pathway
YHR104W	K.MPLVGLGC@WK.I	GRE3	2.651	580.801	0.19	Aldose reductase involved in methylglyoxal, d-xylose and arabinose metabolism; stress induced (osmotic, ionic, oxidative, heat shock, starvation and heavy metals); regulated by the HOG pathway
YHR104W	K.VC@ANQIYEAIK.L	GRE3	3.372	654.835	0.08	Aldose reductase involved in methylglyoxal, d-xylose and arabinose metabolism; stress induced (osmotic, ionic, oxidative, heat shock, starvation and heavy metals); regulated by the HOG pathway
YHR104W	R.ALEEC@VDEGLIK.S	GRE3	4.166	688.343	0.46	Aldose reductase involved in methylglyoxal, d-xylose and arabinose metabolism; stress induced (osmotic, ionic, oxidative, heat shock, starvation and heavy metals); regulated by the HOG pathway
YHR104W	R.LFDGAC@DYGNEK.E	GRE3	4.394	694.793	-0.23	Aldose reductase involved in methylglyoxal, d-xylose and arabinose metabolism; stress induced (osmotic, ionic, oxidative, heat shock, starvation and heavy metals); regulated by the HOG pathway
YHR106W	R.QAVTSAGSGC@IAALDAER.Y	TRR2	2.988	888.931	-0.01	Mitochondrial thioredoxin reductase involved in protection against oxidative stress, required with Glr1p to maintain the redox state of Trx3p; contains active-site motif (CAVC) present in prokaryotic orthologs; binds NADPH and FAD
YHR111W	K.GYNYILDC@TDSPLTR.Y	UBA4	3.331	894.415	-2.61	Protein that activates Urm1p before its conjugation to proteins (urmylation); one target is the thioredoxin peroxidase Ahp1p, suggesting a role of urmylation in the oxidative stress response
YHR111W	R.NYNVC@EPDERISVDAFQR.I	UBA4	2.485	738.008	0.14	Protein that activates Urm1p before its conjugation to proteins (urmylation); one target is the thioredoxin peroxidase Ahp1p, suggesting a role of urmylation in the oxidative stress response
YHR111W	R.NYNVCE#PDER.I	UBA4	2.785	648.269	-0.66	Protein that activates Urm1p before its conjugation to proteins (urmylation); one target is the thioredoxin peroxidase Ahp1p, suggesting a role of urmylation in the oxidative stress response
YHR112C	R.VSVGC@ESANDLIK.D	YHR112C	3.537	696.345	-0.45	Putative protein of unknown function; green fluorescent protein (GFP)-fusion protein localizes to the cytoplasm
YHR114W	K.DYDEAC@STMEMAR.N	BZZ1	3.592	797.794	-0.27	SH3 domain protein implicated in the regulation of actin polymerization, able to recruit actin polymerization machinery through its SH3 domains, colocalizes with cortical actin patches and Las17p, interacts with type I myosins
YHR114W	R.GDDGSGWTYGEC@DGLK.G	BZZ1	2.75	858.843	-0.81	SH3 domain protein implicated in the regulation of actin polymerization, able to recruit actin polymerization machinery through its SH3 domains, colocalizes with cortical actin patches and Las17p, interacts with type I myosins
YHR114W	R.GDDGSGWTYGECD#GLK.G	BZZ1	4.16	858.843	-0.77	SH3 domain protein implicated in the regulation of actin polymerization, able to recruit actin polymerization machinery through its SH3 domains, colocalizes with cortical actin patches and Las17p, interacts with type I myosins
YHR122W	R.VAAAC@ENEQLLGVVSK.M	YHR122W	2.948	844.438	0.5	Protein of unknown function required for establishment of sister chromatid cohesion; green fluorescent protein (GFP)-fusion protein localizes to the cytoplasm; may be involved in transcription; YHR122W is an essential gene
YHR128W	K.IC@GVSIVR.A	FUR1	1.796	452.257	-0.43	Uracil phosphoribosyltransferase, synthesizes UMP from uracil; involved in the pyrimidine salvage pathway
YHR128W	K.YLVPGLGDFGDRYYCV[.-	FUR1	4.294	947.445	-0.27	Uracil phosphoribosyltransferase, synthesizes UMP from uracil; involved in the pyrimidine salvage pathway
YHR128W	R.IYFLNLIC@SK.E	FUR1	2.342	635.847	0.42	Uracil phosphoribosyltransferase, synthesizes UMP from uracil; involved in the pyrimidine salvage pathway
YHR132C	K.YFC@DFLLDPEI.-	ECM14	2.501	716.329	-0.09	Putative metalloprotease with similarity to the zinc carboxypeptidase family, required for normal cell wall assembly
YHR132C	R.NYDVISACK[.D	ECM14	3.045	535.253	0.01	Putative metalloprotease with similarity to the zinc carboxypeptidase family, required for normal cell wall assembly
YHR137W	K.MAVC@PNYSK.Q	ARO9	2.457	535.243	-1.1	Aromatic aminotransferase II, catalyzes the first step of tryptophan, phenylalanine, and tyrosine catabolism
YHR141C	R.C]KHFELGGEK.K	RPL42B	2.892	402.197	-0.05	Protein component of the large (60S) ribosomal subunit, identical to Rpl42Ap and has similarity to rat L44; required for propagation of the killer toxin-encoding M1 double-stranded RNA satellite of the L-A double-stranded RNA virus
YHR141C	R.LEC@VKC@K.T	RPL42B	1.875	468.736	-0.07	Protein component of the large (60S) ribosomal subunit, identical to Rpl42Ap and has similarity to rat L44; required for propagation of the killer toxin-encoding M1 double-stranded RNA satellite of the L-A double-stranded RNA virus
YHR143W-A	K.YIC@AEC@SSK.L	RPC10	2.231	559.236	-0.38	RNA polymerase subunit, found in RNA polymerase complexes I, II, and III
YHR144C	R.HLTNC@FNGGC@PR.C	DCD1	2.271	716.814	-0.6	Deoxycytidine monophosphate (dCMP) deaminase required for dCTP and dTTP synthesis; expression is NOT cell cycle regulated
YHR146W	R.IPEAGGLLC@GKPPR.S	CRP1	1.576	488.938	-0.2	Protein that binds to cruciform DNA structures
YHR154W	K.L]LMDNSCNNC@QIYELYNENLK.D	RTT107	3.014	888.729	-0.74	Protein implicated in Mms22-dependent DNA repair during S phase, DNA damage induces phosphorylation by Mec1p at one or more SQ/TQ motifs; interacts with Mms22p and Slx4p; has four BRCT domains; has a role in regulation of Ty1 transposition
YHR158C	K.DLC@PGVMDVPTDTPTPR.N	KEL1	2.605	935.937	-0.04	Protein required for proper cell fusion and cell morphology; functions in a complex with Kel2p to negatively regulate mitotic exit, interacts with Tem1p and Lte1p; localizes to regions of polarized growth; potential Cdc28p substrate
YHR158C	K.NGVC@SENFENGLR.S	KEL1	3.628	748.333	-0.31	Protein required for proper cell fusion and cell morphology; functions in a complex with Kel2p to negatively regulate mitotic exit, interacts with Tem1p and Lte1p; localizes to regions of polarized growth; potential Cdc28p substrate
YHR158C	R.IKDLC@PGVMDVPTDTPTPR.N	KEL1	2.427	704.687	-0.23	Protein required for proper cell fusion and cell morphology; functions in a complex with Kel2p to negatively regulate mitotic exit, interacts with Tem1p and Lte1p; localizes to regions of polarized growth; potential Cdc28p substrate
YHR163W	K.ALC@FVAEGSSK.Q	SOL3	2.837	584.787	-0.55	6-phosphogluconolactonase, catalyzes the second step of the pentose phosphate pathway; weak multicopy suppressor of los1-1 mutation; homologous to Sol2p and Sol1p
YHR163W	R.VAWC@HDSPKPPSDR.I	SOL3	2.227	413.697	-0.06	6-phosphogluconolactonase, catalyzes the second step of the pentose phosphate pathway; weak multicopy suppressor of los1-1 mutation; homologous to Sol2p and Sol1p
YHR164C	K.TGNAFYENEEDSNC@QR.I	DNA2	2.869	967.386	1.49	Essential tripartite DNA replication factor with single-stranded DNA-dependent ATPase, ATP-dependent nuclease, and helicase activities; required for Okazaki fragment processing; involved in DNA repair pathways; potential Cdc28p substrate
YHR167W	K.LQGILEQYC@APDTDIRGVDAQIK.N	THP2	2.432	868.442	-0.55	Subunit of the THO complex, which connects transcription elongation and mitotic recombination, and of the TREX complex, which is recruited to activated genes and couples transcription to mRNA export; involved in telomere maintenance
YHR174W	K.VKIGLDC@ASSEFFK.D	ENO2	3.256	800.906	0.04	Enolase II, a phosphopyruvate hydratase that catalyzes the conversion of 2-phosphoglycerate to phosphoenolpyruvate during glycolysis and the reverse reaction during gluconeogenesis; expression is induced in response to glucose
YHR182W	K.FTDSPVC@SLQEAQLPQETANADVR.G	YHR182W	4.196	892.757	-0.56	Putative protein of unknown function; green fluorescent protein (GFP)-fusion protein localizes to the cell periphery and cytoplasm
YHR183W	R.C]LSALKNER.I	GND1	2.056	364.194	-0.14	6-phosphogluconate dehydrogenase (decarboxylating), catalyzes an NADPH regenerating reaction in the pentose phosphate pathway; required for growth on D-glucono-delta-lactone and adaptation to oxidative stress
YHR183W	R.VLPEC@ASDNLPVDK.D	GND1	2.954	778.885	-0.04	6-phosphogluconate dehydrogenase (decarboxylating), catalyzes an NADPH regenerating reaction in the pentose phosphate pathway; required for growth on D-glucono-delta-lactone and adaptation to oxidative stress
YHR183W	R.VLPEC@ASDNLPVDKDIHINWTGHGGNVSSSTYQA.-	GND1	2.651	1227.91	-0.49	6-phosphogluconate dehydrogenase (decarboxylating), catalyzes an NADPH regenerating reaction in the pentose phosphate pathway; required for growth on D-glucono-delta-lactone and adaptation to oxidative stress
YHR183W	R.VLPECASD#NLPVDKDIHINWTGHGGNVSSSTYQA.-	GND1	2.579	1227.91	-0.07	6-phosphogluconate dehydrogenase (decarboxylating), catalyzes an NADPH regenerating reaction in the pentose phosphate pathway; required for growth on D-glucono-delta-lactone and adaptation to oxidative stress
YHR188C	R.ASLPNEPIC@TENLTPFIK.L	GPI16	3.378	1022.53	2.73	Transmembrane protein subunit of the glycosylphosphatidylinositol transamidase complex that adds GPIs to newly synthesized proteins; human PIG-Tp homolog
YHR200W	R.IVAFVC@SPISDSRDELIR.L	RPN10	2.389	693.03	0.22	Non-ATPase base subunit of the 19S regulatory particle (RP) of the 26S proteasome; N-terminus plays a role in maintaining the structural integrity of the RP; binds selectively to polyubiquitin chains; homolog of the mammalian S5a protein
YHR201C	R.MSWLFNEHGGEADFVNQCR[.R	PPX1	2.962	771.665	-0.22	Exopolyphosphatase, hydrolyzes inorganic polyphosphate (poly P) into Pi residues; located in the cytosol, plasma membrane, and mitochondrial matrix
YHR203C	K.LSGC@YAPRPSAGPHK.L	RPS4B	2.25	799.398	-0.47	Protein component of the small (40S) ribosomal subunit; identical to Rps4Ap and has similarity to rat S4 ribosomal protein
YHR205W	R.SSSQLDQLNSC@SSVTDPSK.R	SCH9	2.639	1020.46	-0.51	Protein kinase involved in transcriptional activation of osmostress-responsive genes; regulates G1 progression, cAPK activity, nitrogen activation of the FGM pathway; involved in life span regulation; homologous to mammalian Akt/PKB
YHR207C	K.C]YELFC@GAFPK.A	SET5	2.947	696.31	-0.3	Zinc-finger protein of unknown function, contains one canonical and two unusual fingers in unusual arrangements; deletion enhances replication of positive-strand RNA virus
YHR208W	K.EIGWNNEDIHVPLLPGE#QCGALTK.Q	BAT1	3.924	897.446	0.17	Mitochondrial branched-chain amino acid aminotransferase, homolog of murine ECA39; highly expressed during logarithmic phase and repressed during stationary phase
YHR208W	K.KLGANYAPC@ILPQLQAAK.R	BAT1	3.735	652.696	0.22	Mitochondrial branched-chain amino acid aminotransferase, homolog of murine ECA39; highly expressed during logarithmic phase and repressed during stationary phase
YHR208W	K.LGANYAPC@ILPQLQAAK.R	BAT1	3.942	914.493	-0.11	Mitochondrial branched-chain amino acid aminotransferase, homolog of murine ECA39; highly expressed during logarithmic phase and repressed during stationary phase
YHR208W	K.LGANYAPC@ILPQLQAAKR.G	BAT1	2.891	662.032	0.23	Mitochondrial branched-chain amino acid aminotransferase, homolog of murine ECA39; highly expressed during logarithmic phase and repressed during stationary phase
YHR208W	R.IC@LPTFESEELIK.L	BAT1	3.801	789.908	0.56	Mitochondrial branched-chain amino acid aminotransferase, homolog of murine ECA39; highly expressed during logarithmic phase and repressed during stationary phase
YIL021W	K.EGNGVLIC@K.L	RPB3	2.949	495.258	-0.1	RNA polymerase II third largest subunit B44, part of central core; similar to prokaryotic alpha subunit
YIL021W	K.N]CEYEDPPNEGDPFDYK.A	RPB3	3.852	696.943	0.55	RNA polymerase II third largest subunit B44, part of central core; similar to prokaryotic alpha subunit
YIL021W	K.NC@EYEDPPNEGDPFDYK.A	RPB3	4.383	1044.91	0.78	RNA polymerase II third largest subunit B44, part of central core; similar to prokaryotic alpha subunit
YIL030C	K.VANEETDTATFNDDAPSGATC@R.I	SSM4	3.626	1171.5	1.63	Ubiquitin-protein ligase of the ER/nuclear envelope, required for degradation of Alpha2p and other proteins containing a Deg1 degradation signal; ssm4 mutation suppresses mRNA instability caused by an rna14 mutation
YIL030C	R.I]CRGEATEDNPLFHPC@K.C	SSM4	3.116	511.74	0.05	Ubiquitin-protein ligase of the ER/nuclear envelope, required for degradation of Alpha2p and other proteins containing a Deg1 degradation signal; ssm4 mutation suppresses mRNA instability caused by an rna14 mutation
YIL033C	K.RLVINC@LEEK.S	BCY1	2.624	637.35	-0.04	Regulatory subunit of the cyclic AMP-dependent protein kinase (PKA), a component of a signaling pathway that controls a variety of cellular processes, including metabolism, cell cycle, stress response, stationary phase, and sporulation
YIL033C	R.LVINC@LEEK.S	BCY1	2.506	559.3	0.02	Regulatory subunit of the cyclic AMP-dependent protein kinase (PKA), a component of a signaling pathway that controls a variety of cellular processes, including metabolism, cell cycle, stress response, stationary phase, and sporulation
YIL034C	K.DSADSNREYLC@C@DYNR.D	CAP2	3.715	679.939	-0.1	Beta subunit of the capping protein (CP) heterodimer (Cap1p and Cap2p) which binds to the barbed ends of actin filaments preventing further polymerization; localized predominantly to cortical actin patches
YIL039W	R.EGLC@VDGPDTR.Y	TED1	2.643	609.774	-0.92	Conserved phosphoesterase domain-containing protein that acts together with Emp24p/Erv25p in cargo exit from the ER; deletion confers sensitivity to 4-(N-(S-glutathionylacetyl)amino) phenylarsenoxide (GSAO)
YIL041W	K.VALNSSEC@LNK.M	GVP36	3.577	617.808	0	BAR domain-containing protein that localizes to both early and late Golgi vesicles; required for adaptation to varying nutrient concentrations, fluid-phase endocytosis, polarization of the actin cytoskeleton, and vacuole biogenesis
YIL048W	R.V]ACPLTQNLSENDLINR.I	NEO1	5.067	978.997	3.43	Putative aminophospholipid translocase (flippase) involved in endocytosis and vacuolar biogenesis; localizes to endosomes and the Golgi aparatus
YIL064W	R.RNPQD#TGDCWFSDSDAEQK.M	YIL064W	2.528	752.647	-0.25	Putative S-adenosylmethionine-dependent methyltransferase of the seven beta-strand family
YIL064W	R.RNPQDTGDC@WFSDSDAEQK.M	YIL064W	3.922	752.647	-0.08	Putative S-adenosylmethionine-dependent methyltransferase of the seven beta-strand family
YIL075C	K.FGAC@VAQGIMNAGGR.N	RPN2	4.221	762.856	-0.56	Subunit of the 26S proteasome, substrate of the N-acetyltransferase Nat1p
YIL075C	K.FQMNC@YAK.E	RPN2	2.276	531.231	0.4	Subunit of the 26S proteasome, substrate of the N-acetyltransferase Nat1p
YIL075C	R.C@GTAFALGIAC@AGK.G	RPN2	4.279	698.838	-1.47	Subunit of the 26S proteasome, substrate of the N-acetyltransferase Nat1p
YIL078W	K.LIDLC@VGPHIPHTGR.I	THS1	2.335	421.979	0.07	Threonyl-tRNA synthetase, essential cytoplasmic protein
YIL078W	K.NSSC@YFLGDATNDSLQR.V	THS1	4.634	974.429	0.35	Threonyl-tRNA synthetase, essential cytoplasmic protein
YIL079C	R.VPNTDGSAFC@GDNLATK.F	AIR1	3.559	883.905	0.66	RING finger protein that interacts with the arginine methyltransferase Hmt1p to regulate methylation of Npl3p, which modulates Npl3p function in mRNA processing and export; has similarity to Air2p
YIL085C	K.NALQSQENLNTFDEGYNFGC@GC@R.C	KTR7	4.373	898.715	-0.51	Putative mannosyltransferase involved in protein glycosylation; member of the KRE2/MNT1 mannosyltransferase family
YIL094C	K.E]QCQGALFGAVQSPTTK.V	LYS12	3.153	911.444	-0.04	Homo-isocitrate dehydrogenase, an NAD-linked mitochondrial enzyme required for the fourth step in the biosynthesis of lysine, in which homo-isocitrate is oxidatively decarboxylated to alpha-ketoadipate
YIL106W	K.YVEC@LMR.W	MOB1	1.865	493.725	-0.36	Component of the mitotic exit network; associates with and is required for the activation and Cdc15p-dependent phosphorylation of the Dbf2p kinase; required for cytokinesis and cell separation; component of the CCR4 transcriptional complex
YIL108W	K.HSVYPLGNGSC@R.I	YIL108W	2.177	449.547	-0.43	Putative metalloprotease
YIL109C	K.C@AVMEYMAPK.E	SEC24	2.398	608.263	-1.04	Component of the Sec23p-Sec24p heterodimeric complex of the COPII vesicle coat; involved in ER to Golgi transport, cargo selection and autophagy; required for the binding of the Sec13 complex to ER membranes; homologous to Lst1p and Lss1p
YIL109C	K.ETAQLLSC@QDSFYK.N	SEC24	4.163	845.393	-0.27	Component of the Sec23p-Sec24p heterodimeric complex of the COPII vesicle coat; involved in ER to Golgi transport, cargo selection and autophagy; required for the binding of the Sec13 complex to ER membranes; homologous to Lst1p and Lss1p
YIL109C	R.SSDLC@AFSTMPR.D	SEC24	3.3	694.303	0.05	Component of the Sec23p-Sec24p heterodimeric complex of the COPII vesicle coat; involved in ER to Golgi transport, cargo selection and autophagy; required for the binding of the Sec13 complex to ER membranes; homologous to Lst1p and Lss1p
YIL116W	R.C]ARDDFTEGILLDANENAHGPTPVELSK.T	HIS5	3.841	1023.82	0.69	Histidinol-phosphate aminotransferase, catalyzes the seventh step in histidine biosynthesis; responsive to general control of amino acid biosynthesis; mutations cause histidine auxotrophy and sensitivity to Cu, Co, and Ni salts
YIL118W	K.WVGEITDH#CEGVK.L	RHO3	2.645	510.573	-0.22	Non-essential small GTPase of the Rho/Rac subfamily of Ras-like proteins involved in the establishment of cell polarity; GTPase activity positively regulated by the GTPase activating protein (GAP) Rgd1p
YIL123W	K.EGSYC@SYSC@QPGMSK.T	SIM1	2.391	878.835	0.52	Protein of the SUN family (Sim1p, Uth1p, Nca3p, Sun4p) that may participate in DNA replication, promoter contains SCB regulation box at -300 bp indicating that expression may be cell cycle-regulated
YIL124W	R.NGYLVYAC@AR.R	AYR1	3.78	593.787	0.1	NADPH-dependent 1-acyl dihydroxyacetone phosphate reductase found in lipid particles, ER, and mitochondrial outer membrane; involved in phosphatidic acid biosynthesis; required for spore germination; capable of metabolizing steroid hormones
YIL125W	R.YC@GRNPSGAVAAGSK.S	KGD1	2.836	747.859	-0.32	Component of the mitochondrial alpha-ketoglutarate dehydrogenase complex, which catalyzes a key step in the tricarboxylic acid (TCA) cycle, the oxidative decarboxylation of alpha-ketoglutarate to form succinyl-CoA
YIL126W	R.C@FQFGR.L	STH1	2.087	407.687	-0.19	ATPase component of the RSC chromatin remodeling complex; required for expression of early meiotic genes; essential helicase-related protein homologous to Snf2p
YIL137C	K.C@AELC@QIYFK.H	TMA108	2.944	666.309	-0.77	Protein that associates with ribosomes; putative metalloprotease
YIL137C	K.TGTANNHVVATHC@QPFSASNIFPC@IDEPSNK.S	TMA108	5.051	854.146	-0.72	Protein that associates with ribosomes; putative metalloprotease
YIL138C	K.KC@EEFQSKYEEAQK.E	TPM2	2.25	902.414	-0.36	Minor isoform of tropomyosin, binds to and stabilizes actin cables and filaments, which direct polarized cell growth and the distribution of several organelles; appears to have distinct and also overlapping functions with Tpm1p
YIL142W	K.AGEAC@TIVLR.G	CCT2	3.336	545.29	-0.08	Subunit beta of the cytosolic chaperonin Cct ring complex, related to Tcp1p, required for the assembly of actin and tubulins in vivo
YIL142W	K.FSGCKAGE#AC@TIVLR.G	CCT2	2.634	556.945	0.14	Subunit beta of the cytosolic chaperonin Cct ring complex, related to Tcp1p, required for the assembly of actin and tubulins in vivo
YIL142W	K.LLQSASSNTC@MVTNDGATILK.S	CCT2	6.407	747.368	-0.42	Subunit beta of the cytosolic chaperonin Cct ring complex, related to Tcp1p, required for the assembly of actin and tubulins in vivo
YIL142W	R.TVLGGGC@AEMVMSK.A	CCT2	3.126	736.333	-0.8	Subunit beta of the cytosolic chaperonin Cct ring complex, related to Tcp1p, required for the assembly of actin and tubulins in vivo
YIL145C	K.YLC@PESLK.I	PAN6	1.742	505.255	0.1	Pantothenate synthase, also known as pantoate-beta-alanine ligase, required for pantothenic acid biosynthesis, deletion causes pantothenic acid auxotrophy, homologous to E. coli panC
YIL148W	K.ALASKYNC@DK.S	RPL40A	2.688	585.285	0.62	Fusion protein, identical to Rpl40Bp, that is cleaved to yield ubiquitin and a ribosomal protein of the large (60S) ribosomal subunit with similarity to rat L40; ubiquitin may facilitate assembly of the ribosomal protein into ribosomes
YIL148W	K.C]GHTNQLRPK.K	RPL40A	2.53	404.208	-0.17	Fusion protein, identical to Rpl40Bp, that is cleaved to yield ubiquitin and a ribosomal protein of the large (60S) ribosomal subunit with similarity to rat L40; ubiquitin may facilitate assembly of the ribosomal protein into ribosomes
YIL148W	K.CGH#TNQLRPK.K	RPL40A	3.055	404.209	0.14	Fusion protein, identical to Rpl40Bp, that is cleaved to yield ubiquitin and a ribosomal protein of the large (60S) ribosomal subunit with similarity to rat L40; ubiquitin may facilitate assembly of the ribosomal protein into ribosomes
YIL148W	K.YNC@DKSVCR.K	RPL40A	2.298	382.167	0.34	Fusion protein, identical to Rpl40Bp, that is cleaved to yield ubiquitin and a ribosomal protein of the large (60S) ribosomal subunit with similarity to rat L40; ubiquitin may facilitate assembly of the ribosomal protein into ribosomes
YIL155C	K.C]VVNATGPYSDAILQMDRNPSGLPDSPLNDNSK.I	GUT2	2.897	1187.89	0.41	Mitochondrial glycerol-3-phosphate dehydrogenase; expression is repressed by both glucose and cAMP and derepressed by non-fermentable carbon sources in a Snf1p, Rsf1p, Hap2/3/4/5 complex dependent manner
YIR006C	K.NISNPENC@YDSSIPSDLTSR.F	PAN1	3.684	1135.01	0	Part of actin cytoskeleton-regulatory complex Pan1p-Sla1p-End3p, associates with actin patches on the cell cortex; promotes protein-protein interactions essential for endocytosis; previously thought to be a subunit of poly(A) ribonuclease
YIR006C	R.IWTLC@DTSK.A	PAN1	2.1	562.276	-0.14	Part of actin cytoskeleton-regulatory complex Pan1p-Sla1p-End3p, associates with actin patches on the cell cortex; promotes protein-protein interactions essential for endocytosis; previously thought to be a subunit of poly(A) ribonuclease
YIR006C	R.SIVTNGSNTVSGANC@R.K	PAN1	4.093	818.889	-0.37	Part of actin cytoskeleton-regulatory complex Pan1p-Sla1p-End3p, associates with actin patches on the cell cortex; promotes protein-protein interactions essential for endocytosis; previously thought to be a subunit of poly(A) ribonuclease
YIR006C	R.SIVTNGSNTVSGANC@RK.I	PAN1	1.881	882.936	-0.01	Part of actin cytoskeleton-regulatory complex Pan1p-Sla1p-End3p, associates with actin patches on the cell cortex; promotes protein-protein interactions essential for endocytosis; previously thought to be a subunit of poly(A) ribonuclease
YIR007W	K.C@TINGENIQDYLQGR.F	YIR007W	3.061	890.919	1.35	Putative protein of unknown function; green fluorescent protein (GFP)-fusion protein localizes to the cytoplasm; YIR007W is a non-essential gene
YIR012W	K.LMFDNDDLFASC@INGK.V	SQT1	4.832	938.417	0.74	Essential protein involved in a late step of 60S ribosomal subunit assembly or modification; contains multiple WD repeats; interacts with Qsr1p in a two-hybrid assay
YIR021W	K.C]QGVYVTSTNEK.A	MRS1	2.304	693.322	0.01	Protein required for the splicing of two mitochondrial group I introns (BI3 in COB and AI5beta in COX1); forms a splicing complex, containing four subunits of Mrs1p and two subunits of the BI3-encoded maturase, that binds to the BI3 RNA
YIR033W	K.RIVGNDSPDSGTNGNSC@SK.S	MGA2	2.439	655.629	0.26	ER membrane protein involved in regulation of OLE1 transcription, acts with homolog Spt23p; inactive ER form dimerizes and one subunit is then activated by ubiquitin/proteasome-dependent processing followed by nuclear targeting
YIR033W	R.IVGNDSPDSGTNGNSC@SK.S	MGA2	1.776	904.889	-0.53	ER membrane protein involved in regulation of OLE1 transcription, acts with homolog Spt23p; inactive ER form dimerizes and one subunit is then activated by ubiquitin/proteasome-dependent processing followed by nuclear targeting
YIR034C	R.C@GSGAIDLLHK.V	LYS1	3.328	390.869	-0.21	Saccharopine dehydrogenase (NAD+, L-lysine-forming), catalyzes the conversion of saccharopine to L-lysine, which is the final step in the lysine biosynthesis pathway
YIR036C	R.A]VCIAPGVVDTQMQK.D	IRC24	4.292	816.907	-0.46	Putative benzil reductase;(GFP)-fusion protein localizes to the cytoplasm and is induced by the DNA-damaging agent MMS; sequence similarity with short-chain dehydrogenase/reductases; null mutant has increased spontaneous Rad52p foci
YIR036C	R.AVC@IAPGVVDTQMQK.D	IRC24	3.516	808.911	0.19	Putative benzil reductase;(GFP)-fusion protein localizes to the cytoplasm and is induced by the DNA-damaging agent MMS; sequence similarity with short-chain dehydrogenase/reductases; null mutant has increased spontaneous Rad52p foci
YJL001W	K.ELC@YENK.D	PRE3	1.808	478.213	-0.15	Beta 1 subunit of the 20S proteasome, responsible for cleavage after acidic residues in peptides
YJL008C	K.VAVFTC@PLDIANTETK.G	CCT8	2.967	889.953	-0.21	Subunit of the cytosolic chaperonin Cct ring complex, related to Tcp1p, required for the assembly of actin and tubulins in vivo
YJL008C	R.ELH#QMCLTSMGPC@GR.N	CCT8	4.127	598.258	0.26	Subunit of the cytosolic chaperonin Cct ring complex, related to Tcp1p, required for the assembly of actin and tubulins in vivo
YJL008C	R.L]CRVC@GATPLPR.L	CCT8	2.812	467.248	0.48	Subunit of the cytosolic chaperonin Cct ring complex, related to Tcp1p, required for the assembly of actin and tubulins in vivo
YJL008C	R.VC@GATPLPR.L	CCT8	2.441	485.76	-0.36	Subunit of the cytosolic chaperonin Cct ring complex, related to Tcp1p, required for the assembly of actin and tubulins in vivo
YJL012C	K.QLDDKDIC@R.F	VTC4	2.201	388.189	-0.03	Vacuolar membrane protein involved in vacuolar polyphosphate accumulation; functions as a regulator of vacuolar H+-ATPase activity and vacuolar transporter chaperones; involved in non-autophagic vacuolar fusion
YJL012C	K.VYTFC@K.V	VTC4	1.689	409.199	-0.19	Vacuolar membrane protein involved in vacuolar polyphosphate accumulation; functions as a regulator of vacuolar H+-ATPase activity and vacuolar transporter chaperones; involved in non-autophagic vacuolar fusion
YJL014W	K.AC@TIMLR.G	CCT3	1.973	440.723	-0.13	Subunit of the cytosolic chaperonin Cct ring complex, related to Tcp1p, required for the assembly of actin and tubulins in vivo
YJL014W	K.MC@ELALDAVK.T	CCT3	3.033	583.283	0.12	Subunit of the cytosolic chaperonin Cct ring complex, related to Tcp1p, required for the assembly of actin and tubulins in vivo
YJL014W	K.QLEGIQQWPYQAVADAMEC@IPR.T	CCT3	6.406	873.749	0.02	Subunit of the cytosolic chaperonin Cct ring complex, related to Tcp1p, required for the assembly of actin and tubulins in vivo
YJL014W	K.TAIESAC@LLLR.V	CCT3	2.981	623.845	0.21	Subunit of the cytosolic chaperonin Cct ring complex, related to Tcp1p, required for the assembly of actin and tubulins in vivo
YJL014W	R.TC@LGPK.A	CCT3	1.936	338.178	-0.11	Subunit of the cytosolic chaperonin Cct ring complex, related to Tcp1p, required for the assembly of actin and tubulins in vivo
YJL014W	R.VVLLDC@PLEYK.K	CCT3	3.268	674.863	0.14	Subunit of the cytosolic chaperonin Cct ring complex, related to Tcp1p, required for the assembly of actin and tubulins in vivo
YJL016W	K.S]SMCERPIVASTSPIA.-	YJL016W	3.194	861.412	-1.58	Putative protein of unknown function; GFP-fusion protein localizes to the cytoplasm; conserved in closely related Saccharomyces species
YJL042W	K.HVSFATNTYFNDPPQQIC@SK.N	MHP1	3.135	785.366	-0.91	Microtubule-associated protein involved in assembly and stabilization of microtubules; overproduction results in cell cycle arrest at G2 phase; similar to Drosophila protein MAP and to mammalian MAP4 proteins
YJL052W	K.KIVSNASC@TTNC@LAPLAK.V	TDH1	3.526	650.005	0.21	Glyceraldehyde-3-phosphate dehydrogenase, isozyme 1, involved in glycolysis and gluconeogenesis; tetramer that catalyzes the reaction of glyceraldehyde-3-phosphate to 1,3 bis-phosphoglycerate; detected in the cytoplasm and cell-wall
YJL054W	K.NSEWTQELVC@DPR.I	TIM54	3.619	817.367	0.01	Component of the mitochondrial Tim54p-Tim22p complex involved in insertion of polytopic proteins into the inner membrane
YJL055W	K.SVC@VYC@GSSFGAK.A	YJL055W	3.341	711.313	-0.35	Putative protein of unknown function, proposed to be involved in the metabolism of purine and pyrimidine base analogues; deletion mutants are sensitive to HAP and AHA; overexpression confers resistance to 5-FOA and 5-FU
YJL055W	R.FNLNWSDEGHAH#EDCAK.-	YJL055W	2.303	508.217	0.01	Putative protein of unknown function, proposed to be involved in the metabolism of purine and pyrimidine base analogues; deletion mutants are sensitive to HAP and AHA; overexpression confers resistance to 5-FOA and 5-FU
YJL055W	R.FNLNWSDEGHAHEDCAK#.-	YJL055W	3.174	508.217	0.1	Putative protein of unknown function, proposed to be involved in the metabolism of purine and pyrimidine base analogues; deletion mutants are sensitive to HAP and AHA; overexpression confers resistance to 5-FOA and 5-FU
YJL057C	K.SPIASYVC@PQCGTE#INPDIINRR.Q	IKS1	3.19	887.435	-0.78	Putative serine/threonine kinase; expression is induced during mild heat stress; deletion mutants are hypersensitive to copper sulphate and resistant to sorbate; interacts with an N-terminal fragment of Sst2p
YJL060W	R.FAVC@KDDAYLENAVER.L	BNA3	3.708	950.451	2.25	Kynurenine aminotransferase, catalyzes formation of kynurenic acid from kynurenine; potential Cdc28p substrate
YJL060W	R.FAVCK#DDAYLENAVER.L	BNA3	3.545	633.968	-0.11	Kynurenine aminotransferase, catalyzes formation of kynurenic acid from kynurenine; potential Cdc28p substrate
YJL061W	K.AC@ISPCE#R.I	NUP82	2.136	496.718	-0.19	Nucleoporin, subunit of the nuclear pore complex (NPC); forms a subcomplex with Nup159p and Nsp1p, interacts with Nup116p and is required for proper localization of Nup116p in the NPC
YJL068C	K.AQWEAYDPC@LLIK.N	YJL068C	4.189	803.901	0.75	Non-essential intracellular esterase that can function as an S-formylglutathione hydrolase; may be involved in the detoxification of formaldehyde, which can be metabolized to S-formylglutathione; similar to human esterase D
YJL068C	K.S]CSAFAPIVNPSNVPWGQK.A	YJL068C	4.651	1030.01	-0.31	Non-essential intracellular esterase that can function as an S-formylglutathione hydrolase; may be involved in the detoxification of formaldehyde, which can be metabolized to S-formylglutathione; similar to human esterase D
YJL080C	K.FAC@QIDIPNEENNNASKDK.T	SCP160	2.087	736.339	-0.03	Essential RNA-binding G protein effector of mating response pathway, mainly associated with nuclear envelope and ER, interacts in mRNA-dependent manner with translating ribosomes via multiple KH domains, similar to vertebrate vigilins
YJL080C	K.VC@GSTEGENAEK.T	SCP160	1.87	640.774	-0.62	Essential RNA-binding G protein effector of mating response pathway, mainly associated with nuclear envelope and ER, interacts in mRNA-dependent manner with translating ribosomes via multiple KH domains, similar to vertebrate vigilins
YJL087C	K.NTITLPCNAR[.G	TRL1	2.358	580.298	-0.53	tRNA ligase, required for tRNA splicing; composed of three essential domains containing the phosphodiesterase, polynucleotide kinase, and ligase activities required for ligation; localized at the inner membrane of the nuclear envelope
YJL098W	K.ALVTISGNCPNE#ITSSIGPNELTR.Q	SAP185	3.461	848.43	-0.28	Protein that forms a complex with the Sit4p protein phosphatase and is required for its function; member of a family of similar proteins including Sap4p, Sap155p, and Sap190p
YJL104W	K.GEYGGITLDESC@K.I	PAM16	3.561	714.819	0.17	Constituent of the mitochondrial import motor associated with the presequence translocase, along with Ssc1p, Tim44p, Mge1p, and Pam18p; forms a 1:1 subcomplex with Pam18p and inhibits its cochaperone activity; contains J-like domain
YJL111W	K.T]CTLLLR.G	CCT7	1.837	438.752	-0.27	Subunit of the cytosolic chaperonin Cct ring complex, related to Tcp1p, required for the assembly of actin and tubulins in vivo
YJL111W	R.YNLFQGC@PQAK.T	CCT7	3.438	663.32	0.98	Subunit of the cytosolic chaperonin Cct ring complex, related to Tcp1p, required for the assembly of actin and tubulins in vivo
YJL116C	K.SVGGLY#CK.N	NCA3	1.769	442.221	-0.5	Protein that functions with Nca2p to regulate mitochondrial expression of subunits 6 (Atp6p) and 8 (Atp8p ) of the Fo-F1 ATP synthase; member of the SUN family
YJL121C	K.C@GADQFTFHYEATQDPLHLVK.L	RPE1	4.03	620.044	-0.15	D-ribulose-5-phosphate 3-epimerase, catalyzes a reaction in the non-oxidative part of the pentose-phosphate pathway; mutants are sensitive to oxidative stress
YJL125C	K.VGLC@C@FSPC@IEQVDK.T	GCD14	3.688	906.409	-1.4	Subunit of tRNA (1-methyladenosine) methyltransferase, with Gcd10p, required for the modification of the adenine at position 58 in tRNAs, especially tRNAi-Met; first identified as a negative regulator of GCN4 expression
YJL128C	K.TNIGC@QSYMAPER.I	PBS2	2.776	771.839	1.72	MAP kinase kinase that plays a pivotal role in the osmosensing signal-transduction pathway, activated under severe osmotic stress; plays a role in regulating Ty1 transposition
YJL130C	K.C]IVNPSPASITASAELQSTSAK.R	URA2	3.971	1116.56	-0.03	Bifunctional carbamoylphosphate synthetase (CPSase)-aspartate transcarbamylase (ATCase), catalyzes the first two enzymatic steps in the de novo biosynthesis of pyrimidines; both activities are subject to feedback inhibition by UTP
YJL130C	K.DNEIKVIEC@NVR.A	URA2	2.627	744.878	0.24	Bifunctional carbamoylphosphate synthetase (CPSase)-aspartate transcarbamylase (ATCase), catalyzes the first two enzymatic steps in the de novo biosynthesis of pyrimidines; both activities are subject to feedback inhibition by UTP
YJL130C	K.DYC@IIEVNAR.L	URA2	3.085	626.802	-1.95	Bifunctional carbamoylphosphate synthetase (CPSase)-aspartate transcarbamylase (ATCase), catalyzes the first two enzymatic steps in the de novo biosynthesis of pyrimidines; both activities are subject to feedback inhibition by UTP
YJL130C	K.ELVDLC@NVAFSSSPQVLVEK.S	URA2	4.716	1117.57	-1.1	Bifunctional carbamoylphosphate synthetase (CPSase)-aspartate transcarbamylase (ATCase), catalyzes the first two enzymatic steps in the de novo biosynthesis of pyrimidines; both activities are subject to feedback inhibition by UTP
YJL130C	K.S]TCAC@FEPSLDYC@VVK.M	URA2	2.672	968.418	-0.34	Bifunctional carbamoylphosphate synthetase (CPSase)-aspartate transcarbamylase (ATCase), catalyzes the first two enzymatic steps in the de novo biosynthesis of pyrimidines; both activities are subject to feedback inhibition by UTP
YJL130C	K.S]TCAC@FEPSLDYCVVK[.M	URA2	4.22	968.417	-0.48	Bifunctional carbamoylphosphate synthetase (CPSase)-aspartate transcarbamylase (ATCase), catalyzes the first two enzymatic steps in the de novo biosynthesis of pyrimidines; both activities are subject to feedback inhibition by UTP
YJL130C	R.GHNIPCTSTISGR[.C	URA2	2.17	700.341	-0.24	Bifunctional carbamoylphosphate synthetase (CPSase)-aspartate transcarbamylase (ATCase), catalyzes the first two enzymatic steps in the de novo biosynthesis of pyrimidines; both activities are subject to feedback inhibition by UTP
YJL130C	R.HLGVVGEC@NIQYALNPVSK.D	URA2	2.639	700.03	-0.32	Bifunctional carbamoylphosphate synthetase (CPSase)-aspartate transcarbamylase (ATCase), catalyzes the first two enzymatic steps in the de novo biosynthesis of pyrimidines; both activities are subject to feedback inhibition by UTP
YJL130C	R.TC@SSFIAAMER.L	URA2	3.301	644.787	0.09	Bifunctional carbamoylphosphate synthetase (CPSase)-aspartate transcarbamylase (ATCase), catalyzes the first two enzymatic steps in the de novo biosynthesis of pyrimidines; both activities are subject to feedback inhibition by UTP
YJL130C	R.TLAC@YSDAIVMR.H	URA2	3.436	708.337	0.54	Bifunctional carbamoylphosphate synthetase (CPSase)-aspartate transcarbamylase (ATCase), catalyzes the first two enzymatic steps in the de novo biosynthesis of pyrimidines; both activities are subject to feedback inhibition by UTP
YJL141C	K.IIDFGSSC@EEAR.T	YAK1	3.329	692.314	-0.48	Serine-threonine protein kinase that is part of a glucose-sensing system involved in growth control in response to glucose availability; translocates from the cytoplasm to the nucleus and phosphorylates Pop2p in response to a glucose signal
YJL145W	K.C@AGYDELYGYK.L	SFH5	3.638	669.787	-0.34	Putative phosphatidylinositol transfer protein (PITP), exhibits phosphatidylinositol- but not phosphatidylcholine-transfer activity, localized to cytosol and microsomes, similar to Sec14p; may be PITP regulator rather than actual PITP
YJL145W	K.DC@PYEGYGGK.D	SFH5	1.871	573.232	0.09	Putative phosphatidylinositol transfer protein (PITP), exhibits phosphatidylinositol- but not phosphatidylcholine-transfer activity, localized to cytosol and microsomes, similar to Sec14p; may be PITP regulator rather than actual PITP
YJL145W	R.EFNPLSC@AYK.E	SFH5	2.499	614.787	-0.52	Putative phosphatidylinositol transfer protein (PITP), exhibits phosphatidylinositol- but not phosphatidylcholine-transfer activity, localized to cytosol and microsomes, similar to Sec14p; may be PITP regulator rather than actual PITP
YJL167W	K.C]SWVINK.A	ERG20	2.82	453.729	-0.02	Farnesyl pyrophosphate synthetase, has both dimethylallyltranstransferase and geranyltranstransferase activities; catalyzes the formation of C15 farnesyl pyrophosphate units for isoprenoid and sterol biosynthesis
YJL167W	K.EAC@DWYAHSLNYNTPGGK.L	ERG20	3.875	694.971	0.21	Farnesyl pyrophosphate synthetase, has both dimethylallyltranstransferase and geranyltranstransferase activities; catalyzes the formation of C15 farnesyl pyrophosphate units for isoprenoid and sterol biosynthesis
YJL167W	K.EAC@DWYAHSLNYNTPGGKLNR.G	ERG20	3.408	822.714	1.15	Farnesyl pyrophosphate synthetase, has both dimethylallyltranstransferase and geranyltranstransferase activities; catalyzes the formation of C15 farnesyl pyrophosphate units for isoprenoid and sterol biosynthesis
YJL167W	R.DVLIPLGEYFQIQDDYLDC@FGTPEQIGK.I	ERG20	3.707	1091.86	-0.19	Farnesyl pyrophosphate synthetase, has both dimethylallyltranstransferase and geranyltranstransferase activities; catalyzes the formation of C15 farnesyl pyrophosphate units for isoprenoid and sterol biosynthesis
YJL172W	K.CE#KIEPLSPSFK.H	CPS1	3.448	478.915	0.01	Vacuolar carboxypeptidase yscS; expression is induced under low-nitrogen conditions
YJL172W	K.KTILGAPFC@PR.R	CPS1	2.169	420.569	-0.4	Vacuolar carboxypeptidase yscS; expression is induced under low-nitrogen conditions
YJL172W	K.TILGAPFC@PR.R	CPS1	2.23	566.303	0.18	Vacuolar carboxypeptidase yscS; expression is induced under low-nitrogen conditions
YJL190C	K.C]GVISPR.F	RPS22A	2.436	394.708	-0.58	Protein component of the small (40S) ribosomal subunit; nearly identical to Rps22Bp and has similarity to E. coli S8 and rat S15a ribosomal proteins
YJL197W	K.NNSGLGSSSTSEISEGC@PENEVADLNLK.N	UBP12	4.33	970.111	2.12	Ubiquitin carboxyl-terminal hydrolase, ubiquitin-specific protease present in the nucleus and cytoplasm that cleaves ubiquitin from ubiquitinated proteins
YJL200C	K.ILYSH#LCDPEESITSSDLSTIRGNK.Y	ACO2	3.141	709.601	-0.56	Putative mitochondrial aconitase isozyme; similarity to Aco1p, an aconitase required for the TCA cycle; expression induced during growth on glucose, by amino acid starvation via Gcn4p, and repressed on ethanol
YJL200C	K.ILYSHLCDPE#ESITSSDLSTIRGNK.Y	ACO2	3.449	709.601	-0.56	Putative mitochondrial aconitase isozyme; similarity to Aco1p, an aconitase required for the TCA cycle; expression induced during growth on glucose, by amino acid starvation via Gcn4p, and repressed on ethanol
YJL200C	K.VLANAC@GPC@IGQWNR.E	ACO2	2.655	858.41	0.82	Putative mitochondrial aconitase isozyme; similarity to Aco1p, an aconitase required for the TCA cycle; expression induced during growth on glucose, by amino acid starvation via Gcn4p, and repressed on ethanol
YJL200C	K.VSAGLIGSC@TNSSYQDMSR.V	ACO2	3.22	1024.95	-0.79	Putative mitochondrial aconitase isozyme; similarity to Aco1p, an aconitase required for the TCA cycle; expression induced during growth on glucose, by amino acid starvation via Gcn4p, and repressed on ethanol
YJL201W	R.YSELGC@LTLPR.S	ECM25	3.958	654.834	-1.1	Non-essential protein of unknown function; promoter contains a consensus binding sequence for factor Abf1p
YJL203W	R.TILDNC@FER.T	PRP21	2.656	584.276	-0.71	Subunit of the SF3a splicing factor complex, required for spliceosome assembly
YJL217W	R.LAPFPTSDHYLVGPMACTPE#R.G	YJL217W	2.527	792.377	0.03	Cytoplasmic protein of unknown function; expression induced by calcium shortage and via the copper sensing transciption factor Mac1p during conditons of copper deficiency; mRNA is cell cycle regulated, peaking in G1 phase
YJL218W	R.DIPENVVAAGNPC@K.V	YJL218W	2.607	742.365	0.65	Putative protein of unknown function, similar to bacterial galactoside O-acetyltransferases; induced by oleate in an OAF1/PIP2-dependent manner; promoter contains an oleate response element consensus sequence; non-essential gene
YJR002W	K.AYIDSVINTC@K.N	MPP10	2.833	642.319	0.97	Component of the SSU processome and 90S preribosome, required for pre-18S rRNA processing, interacts with and controls the stability of Imp3p and Imp4p, essential for viability; similar to human Mpp10p
YJR007W	K.YGGVC@NITMPPK.A	SUI2	3.642	676.821	0.04	Alpha subunit of the translation initiation factor eIF2, involved in the identification of the start codon; phosphorylation of Ser51 is required for regulation of translation by inhibiting the exchange of GDP for GTP
YJR007W	R.VSSEDIIKC@EEK.Y	SUI2	2.575	479.569	0.01	Alpha subunit of the translation initiation factor eIF2, involved in the identification of the start codon; phosphorylation of Ser51 is required for regulation of translation by inhibiting the exchange of GDP for GTP
YJR007W	R.VSSEDIIKCE#EK.Y	SUI2	2.478	718.85	-0.48	Alpha subunit of the translation initiation factor eIF2, involved in the identification of the start codon; phosphorylation of Ser51 is required for regulation of translation by inhibiting the exchange of GDP for GTP
YJR012C	R.LSEC@YDIQSK.L	YJR012C	2.833	621.787	0.17	Putative protein of unknown function; proposed involvement in transport based on mass spectrometry analysis of copurifying proteins; partially overlaps neighboring ORF, GPI14/YJR013W
YJR016C	K.LAEC@DNIGEYIK.K	ILV3	3.296	712.84	0.04	Dihydroxyacid dehydratase, catalyzes third step in the common pathway leading to biosynthesis of branched-chain amino acids
YJR016C	K.LAEC@DNIGEYIKK.T	ILV3	2.721	518.261	0.16	Dihydroxyacid dehydratase, catalyzes third step in the common pathway leading to biosynthesis of branched-chain amino acids
YJR016C	K.LVSNASNGC@VLDA.-	ILV3	3.793	660.317	0.09	Dihydroxyacid dehydratase, catalyzes third step in the common pathway leading to biosynthesis of branched-chain amino acids
YJR016C	R.HNRPSIMVYGGTILPGHPTC@GSSK.I	ILV3	3.483	646.319	-1.72	Dihydroxyacid dehydratase, catalyzes third step in the common pathway leading to biosynthesis of branched-chain amino acids
YJR016C	R.HNRPSIMVYGGTILPGHPTCGSSK#.I	ILV3	3.323	646.319	-1.62	Dihydroxyacid dehydratase, catalyzes third step in the common pathway leading to biosynthesis of branched-chain amino acids
YJR032W	K.LC@AGDVK.S	CPR7	2.684	381.694	-0.22	Peptidyl-prolyl cis-trans isomerase (cyclophilin), catalyzes the cis-trans isomerization of peptide bonds N-terminal to proline residues; binds to Hsp82p and contributes to chaperone activity
YJR032W	R.ISDC@GVWEK.T	CPR7	3.071	547.252	-1.23	Peptidyl-prolyl cis-trans isomerase (cyclophilin), catalyzes the cis-trans isomerization of peptide bonds N-terminal to proline residues; binds to Hsp82p and contributes to chaperone activity
YJR034W	K.AVAIC@LQR.S	PET191	2.163	465.763	-0.35	Protein required for assembly of cytochrome c oxidase; the authentic, non-tagged protein is detected in highly purified mitochondria in high-throughput studies
YJR054W	K.SQDVC@GPIPTMK.K	YJR054W	2.589	674.815	-1.05	Vacuolar protein of unknown function; potential Cdc28p substrate
YJR059W	K.GC@HKPGPGSEYSLAR.N	PTK2	3.446	539.26	0.74	Putative serine/threonine protein kinase involved in regulation of ion transport across plasma membrane; enhances spermine uptake
YJR059W	K.T]CQGMIGSPPYTPPEVMYFDAK.K	PTK2	2.794	841.041	0.57	Putative serine/threonine protein kinase involved in regulation of ion transport across plasma membrane; enhances spermine uptake
YJR060W	K.AAILAC@AAEYIQK.L	CBF1	3.864	711.377	0.63	Helix-loop-helix protein that binds the motif CACRTG, which is present at several sites including MET gene promoters and centromere DNA element I (CDEI); required for nucleosome positioning at this motif; targets Isw1p to DNA
YJR063W	K.C]PQC@GNEEMNYHTLQLR.S	RPA12	3.479	717.312	-0.55	RNA polymerase I subunit A12.2; contains two zinc binding domains, and the N terminal domain is responsible for anchoring to the RNA pol I complex
YJR063W	K.C]PQCGNE#EMNYHTLQLR.S	RPA12	3.162	722.643	-0.45	RNA polymerase I subunit A12.2; contains two zinc binding domains, and the N terminal domain is responsible for anchoring to the RNA pol I complex
YJR063W	R.SADEGATVFYTC@TSC@GYK.F	RPA12	5.125	1008.92	-0.34	RNA polymerase I subunit A12.2; contains two zinc binding domains, and the N terminal domain is responsible for anchoring to the RNA pol I complex
YJR064W	K.ISNIGVDC@LGYGSNDMK.E	CCT5	4.372	921.923	0.91	Subunit of the cytosolic chaperonin Cct ring complex, related to Tcp1p, required for the assembly of actin and tubulins in vivo
YJR064W	K.LAISKLEETCDD#ISASNDELFR.D	CCT5	2.805	842.738	-1.15	Subunit of the cytosolic chaperonin Cct ring complex, related to Tcp1p, required for the assembly of actin and tubulins in vivo
YJR064W	K.QQILLATQLC@R.M	CCT5	2.765	672.377	0.27	Subunit of the cytosolic chaperonin Cct ring complex, related to Tcp1p, required for the assembly of actin and tubulins in vivo
YJR064W	R.ALHDSLC@VVR.N	CCT5	2.395	390.542	0.63	Subunit of the cytosolic chaperonin Cct ring complex, related to Tcp1p, required for the assembly of actin and tubulins in vivo
YJR065C	K.IKQEYC@YVC@PDIVK.E	ARP3	4.152	605.632	-0.09	Essential component of the Arp2/3 complex, which is a highly conserved actin nucleation center required for the motility and integrity of actin patches; involved in endocytosis and membrane growth and polarity
YJR065C	K.QEYCY#VC@PDIVK.E	ARP3	3.247	787.355	0.6	Essential component of the Arp2/3 complex, which is a highly conserved actin nucleation center required for the motility and integrity of actin patches; involved in endocytosis and membrane growth and polarity
YJR067C	K.WTDIANTYC@EK.Y	YAE1	3.497	700.811	-0.3	Essential protein of unknown function
YJR070C	R.ETC@ELAINR.I	LIA1	2.558	553.269	-0.01	Deoxyhypusine hydroxylase, a HEAT-repeat containing metalloenzyme that catalyses hypusine formation; binds to and is required for the modification of Hyp2p (eIF5A); complements S. pombe mmd1 mutants defective in mitochondrial positioning
YJR077C	K.STLGC@PPTIEIGGGGH.-	MIR1	2.996	776.875	0.15	Mitochondrial phosphate carrier, imports inorganic phosphate into mitochondria; functionally redundant with Pic2p but more abundant than Pic2p under normal conditions; phosphorylated
YJR092W	K.KVLDEGC@SNEPVTFLGENDTR.S	BUD4	4.031	794.04	-0.69	Protein involved in bud-site selection and required for axial budding pattern; localizes with septins to bud neck in mitosis and may constitute an axial landmark for next round of budding; potential Cdc28p substrate
YJR092W	K.TSAEEHDLSSSC@EDQSVSEAR.N	BUD4	3.118	775.324	-0.22	Protein involved in bud-site selection and required for axial budding pattern; localizes with septins to bud neck in mitosis and may constitute an axial landmark for next round of budding; potential Cdc28p substrate
YJR092W	K.VLDEGC@SNEPVTFLGENDTR.S	BUD4	3.207	1126.51	2.31	Protein involved in bud-site selection and required for axial budding pattern; localizes with septins to bud neck in mitosis and may constitute an axial landmark for next round of budding; potential Cdc28p substrate
YJR094W-A	K.RGAAGIWTC@SC@C@KK.T	RPL43B	3.637	552.258	-0.28	Protein component of the large (60S) ribosomal subunit, identical to Rpl43Ap and has similarity to rat L37a ribosomal protein
YJR094W-A	R.GAAGIWTC@SC@C@K.K	RPL43B	3.753	685.786	0.14	Protein component of the large (60S) ribosomal subunit, identical to Rpl43Ap and has similarity to rat L37a ribosomal protein
YJR094W-A	R.GAAGIWTC@SC@C@KK.T	RPL43B	2.345	749.833	-0.3	Protein component of the large (60S) ribosomal subunit, identical to Rpl43Ap and has similarity to rat L37a ribosomal protein
YJR094W-A	R.GAAGIWTC@SC@CK.K	RPL43B	3.733	657.275	-0.37	Protein component of the large (60S) ribosomal subunit, identical to Rpl43Ap and has similarity to rat L37a ribosomal protein
YJR094W-A	R.YDC@SFC@GK.K	RPL43B	2.505	518.697	-0.25	Protein component of the large (60S) ribosomal subunit, identical to Rpl43Ap and has similarity to rat L37a ribosomal protein
YJR094W-A	R.YDC@SFCGKK#.T	RPL43B	2.698	582.744	-0.16	Protein component of the large (60S) ribosomal subunit, identical to Rpl43Ap and has similarity to rat L37a ribosomal protein
YJR096W	K.FLDHPDAYEPTDWEC@TDAP.-	YJR096W	2.661	1139.96	-0.44	Putative xylose and arabinose reductase; member of the aldo-keto reductase (AKR) family; GFP-fusion protein is induced in response to the DNA-damaging agent MMS
YJR103W	R.C]EIFELK.G	URA8	2.426	469.736	0.02	Minor CTP synthase isozyme (see also URA7), catalyzes the ATP-dependent transfer of the amide nitrogen from glutamine to UTP, forming CTP, the final step in de novo biosynthesis of pyrimidines; involved in phospholipid biosynthesis
YJR104C	K.TGNAGPRPAC@GVIGLTN.-	SOD1	3.135	827.92	0.06	Cytosolic superoxide dismutase; some mutations are analogous to those that cause ALS (amyotrophic lateral sclerosis) in humans
YJR105W	K.C]AALITGHNR.S	ADO1	2.844	556.785	-0.4	Adenosine kinase, required for the utilization of S-adenosylmethionine (AdoMet); may be involved in recycling adenosine produced through the methyl cycle
YJR105W	K.SMYQVQNDIGTGK.C	ADO1	3.19	728.84	-0.65	Adenosine kinase, required for the utilization of S-adenosylmethionine (AdoMet); may be involved in recycling adenosine produced through the methyl cycle
YJR105W	R.VLPYATVIIANESE#AEAFC@DAFQLDCANTDLEAIAQR.I	ADO1	2.689	1032.99	-1.21	Adenosine kinase, required for the utilization of S-adenosylmethionine (AdoMet); may be involved in recycling adenosine produced through the methyl cycle
YJR109C	K.DINIPIAESFAC@ETVDEALEAAER.V	CPA2	3.915	888.422	-0.12	Large subunit of carbamoyl phosphate synthetase, which catalyzes a step in the synthesis of citrulline, an arginine precursor
YJR109C	K.LYDNGC@NIMGTNPNDIDR.A	CPA2	4.234	1049.45	-0.74	Large subunit of carbamoyl phosphate synthetase, which catalyzes a step in the synthesis of citrulline, an arginine precursor
YJR109C	K.LYDNGC@NIMGTNPNDIDRAENR.H	CPA2	3.029	856.711	-0.21	Large subunit of carbamoyl phosphate synthetase, which catalyzes a step in the synthesis of citrulline, an arginine precursor
YJR109C	K.VIEC@NIR.A	CPA2	2.003	452.239	-0.26	Large subunit of carbamoyl phosphate synthetase, which catalyzes a step in the synthesis of citrulline, an arginine precursor
YJR112W	K.QGAINVANC@QR.Q	NNF1	2.703	615.804	0.03	Essential component of the MIND kinetochore complex (Mtw1p Including Nnf1p-Nsl1p-Dsn1p) which joins kinetochore subunits contacting DNA to those contacting microtubules; required for accurate chromosome segregation
YJR112W	K.VSSC@FPQYVNSK.Q	NNF1	3.103	708.335	-0.34	Essential component of the MIND kinetochore complex (Mtw1p Including Nnf1p-Nsl1p-Dsn1p) which joins kinetochore subunits contacting DNA to those contacting microtubules; required for accurate chromosome segregation
YJR123W	K.AQC@PIIER.L	RPS5	2.72	493.758	0.11	Protein component of the small (40S) ribosomal subunit, the least basic of the non-acidic ribosomal proteins; phosphorylated in vivo; essential for viability; has similarity to E. coli S7 and rat S5 ribosomal proteins
YJR123W	K.AQCPIIER.L	RPS5	1.823	465.247	-0.06	Protein component of the small (40S) ribosomal subunit, the least basic of the non-acidic ribosomal proteins; phosphorylated in vivo; essential for viability; has similarity to E. coli S7 and rat S5 ribosomal proteins
YJR123W	R.KAQC@PIIER.L	RPS5	2.942	557.805	-0.49	Protein component of the small (40S) ribosomal subunit, the least basic of the non-acidic ribosomal proteins; phosphorylated in vivo; essential for viability; has similarity to E. coli S7 and rat S5 ribosomal proteins
YJR131W	K.GITDTC@YQMYK.Q	MNS1	3.659	690.303	0.63	Alpha-1,2-mannosidase involved in ER quality control; catalyzes the removal of one mannose residue from Man9GlcNAc to produce a single isomer of Man8GlcNAc in N-linked oligosaccharide biosynthesis; integral to ER membrane
YJR137C	R.LGSC@LGFVK.T	ECM17	2.973	490.765	-0.21	Sulfite reductase beta subunit, involved in amino acid biosynthesis, transcription repressed by methionine
YJR144W	R.GEQDYFNEAGIPTATEGCK#.S	MGM101	4.304	1043.96	0.49	Protein involved in mitochondrial genome maintenance; component of the mitochondrial nucleoid, required for the repair of oxidative mtDNA damage
YJR148W	K.KLGANYAPC@VLPQLQAASR.G	BAT2	4.066	686.37	0.13	Cytosolic branched-chain amino acid aminotransferase, homolog of murine ECA39; highly expressed during stationary phase and repressed during logarithmic phase
YJR148W	K.LGANYAPC@VLPQLQAASR.G	BAT2	2.262	965.004	-0.32	Cytosolic branched-chain amino acid aminotransferase, homolog of murine ECA39; highly expressed during stationary phase and repressed during logarithmic phase
YJR148W	R.IC@LPTFDPEELITLIGK.L	BAT2	2.714	980.029	-0.44	Cytosolic branched-chain amino acid aminotransferase, homolog of murine ECA39; highly expressed during stationary phase and repressed during logarithmic phase
YKL006W	K.KWAAAAVC@EK.W	RPL14A	3.225	567.292	0.07	N-terminally acetylated protein component of the large (60S) ribosomal subunit, nearly identical to Rpl14Bp and has similarity to rat L14 ribosomal protein; rpl14a csh5 double null mutant exhibits synthetic slow growth
YKL006W	K.WAAAAVC@EK.W	RPL14A	3.617	503.245	0.15	N-terminally acetylated protein component of the large (60S) ribosomal subunit, nearly identical to Rpl14Bp and has similarity to rat L14 ribosomal protein; rpl14a csh5 double null mutant exhibits synthetic slow growth
YKL006W	K.WAAAAVCEK.W	RPL14A	2.488	474.734	-0.38	N-terminally acetylated protein component of the large (60S) ribosomal subunit, nearly identical to Rpl14Bp and has similarity to rat L14 ribosomal protein; rpl14a csh5 double null mutant exhibits synthetic slow growth
YKL007W	K.DINQSNVDDVVC@TIR.D	CAP1	3.577	874.417	-0.38	Alpha subunit of the capping protein (CP) heterodimer (Cap1p and Cap2p) which binds to the barbed ends of actin filaments preventing further polymerization; localized predominantly to cortical actin patches
YKL009W	K.ITIDSPYLVC@TEGEK.L	MRT4	3.142	575.618	-1.43	Protein involved in mRNA turnover and ribosome assembly, localizes to the nucleolus
YKL018W	K.VLRPQGFIPC@VSH#ETCPR.S	SWD2	3.075	718.363	0.05	Subunit of the COMPASS (Set1C) complex, which methylates histone H3 on lys 4 and is involved in telomeric silencing; subunit of CPF (cleavage and polyadenylation factor), a complex involved in RNAP II transcription termination
YKL027W	R.HSC@AILNDVGTPK.V	YKL027W	2.862	471.238	-0.06	Protein of unknown function, localized to the mitochondrial outer membrane
YKL029C	K.VPRDFDEC@LQWVK.A	MAE1	3.017	564.611	-0.99	Mitochondrial malic enzyme, catalyzes the oxidative decarboxylation of malate to pyruvate, which is a key intermediate in sugar metabolism and a precursor for synthesis of several amino acids
YKL029C	R.I]SENNNCYSFPGIGLGAVLSR.A	MAE1	3.538	756.708	0.55	Mitochondrial malic enzyme, catalyzes the oxidative decarboxylation of malate to pyruvate, which is a key intermediate in sugar metabolism and a precursor for synthesis of several amino acids
YKL029C	R.SLHDVVENVK#PTCLVGC@STQAGAFTQDVVEEMHK.H	MAE1	4.978	951.203	0.69	Mitochondrial malic enzyme, catalyzes the oxidative decarboxylation of malate to pyruvate, which is a key intermediate in sugar metabolism and a precursor for synthesis of several amino acids
YKL029C	R.SLHDVVENVKPTC@LVGC@STQAGAFTQDVVEEMHK.H	MAE1	3.669	951.203	0.42	Mitochondrial malic enzyme, catalyzes the oxidative decarboxylation of malate to pyruvate, which is a key intermediate in sugar metabolism and a precursor for synthesis of several amino acids
YKL029C	R.VLPVC@LDVGTNNK.K	MAE1	2.309	714.879	-0.03	Mitochondrial malic enzyme, catalyzes the oxidative decarboxylation of malate to pyruvate, which is a key intermediate in sugar metabolism and a precursor for synthesis of several amino acids
YKL033W-A	K.FHTDIKPDEC@IVFEDGIPGVK.S	YKL033W-A	4.247	806.067	-0.07	Putative protein of unknown function; similar to uncharacterized proteins from other fungi
YKL033W-A	K.W]GTCEFLPGALNLLK.Y	YKL033W-A	2.618	859.95	-0.69	Putative protein of unknown function; similar to uncharacterized proteins from other fungi
YKL035W	K.LNGGLGTSMGC@VGPK.S	UGP1	3.664	732.353	-0.25	UDP-glucose pyrophosphorylase (UGPase), catalyses the reversible formation of UDP-Glc from glucose 1-phosphate and UTP, involved in a wide variety of metabolic pathways, expression modulated by Pho85p through Pho4p
YKL035W	K.LNGGLGTSMGCVGPK[.S	UGP1	2.86	732.353	0.42	UDP-glucose pyrophosphorylase (UGPase), catalyses the reversible formation of UDP-Glc from glucose 1-phosphate and UTP, involved in a wide variety of metabolic pathways, expression modulated by Pho85p through Pho4p
YKL035W	K.TC@SDLLLVK.S	UGP1	2.389	524.789	0.14	UDP-glucose pyrophosphorylase (UGPase), catalyses the reversible formation of UDP-Glc from glucose 1-phosphate and UTP, involved in a wide variety of metabolic pathways, expression modulated by Pho85p through Pho4p
YKL035W	R.DGHEINVLQLETAC@GAAIR.H	UGP1	4.539	689.681	0.27	UDP-glucose pyrophosphorylase (UGPase), catalyses the reversible formation of UDP-Glc from glucose 1-phosphate and UTP, involved in a wide variety of metabolic pathways, expression modulated by Pho85p through Pho4p
YKL039W	K.NYQVC@AGMYSK.E	PTM1	2.52	660.789	-0.19	Protein of unknown function, copurifies with late Golgi vesicles containing the v-SNARE Tlg2p
YKL040C	R.LQGAC@TSC@SSSEVTLK.Y	NFU1	3.512	864.4	-0.68	Protein involved in iron metabolism in mitochondria; similar to NifU, which is a protein required for the maturation of the Fe/S clusters of nitrogenase in nitrogen-fixing bacteria
YKL047W	K.LILGELQEDASTNATC@R.H	YKL047W	3.565	945.965	-0.17	Putative protein of unknown function; green fluorescent protein (GFP)-fusion protein localizes to the cytoplasm
YKL052C	K.ITQDIIPHVATYSEICER[.I	ASK1	3.867	715.693	-0.41	Essential subunit of the Dam1 complex (aka DASH complex), couples kinetochores to the force produced by MT depolymerization thereby aiding in chromosome segregation; phosphorylated during the cell cycle by cyclin-dependent kinases
YKL058W	K.N]CQVTVEDSHRDASQNGSGDSQSVISVDK.L	TOA2	2.924	780.604	-0.06	TFIIA small subunit; involved in transcriptional activation, acts as antirepressor or as coactivator; homologous to smallest subunit of human and Drosophila TFIIA
YKL059C	K.C@C@NIDFSK.E	MPE1	1.563	522.218	0.1	Essential conserved subunit of CPF (cleavage and polyadenylation factor), plays a role in 3' end formation of mRNA via the specific cleavage and polyadenylation of pre-mRNA, contains a putative RNA-binding zinc knuckle motif
YKL060C	K.EHGEPLFSSHMLDLSEETDEENISTC@VK.Y	FBA1	2.619	813.11	-0.02	Fructose 1,6-bisphosphate aldolase, required for glycolysis and gluconeogenesis; catalyzes conversion of fructose 1,6 bisphosphate to glyceraldehyde-3-P and dihydroxyacetone-P; locates to mitochondrial outer surface upon oxidative stress
YKL060C	K.VNLDTDC@QYAYLTGIR.D	FBA1	5.921	951.457	-0.08	Fructose 1,6-bisphosphate aldolase, required for glycolysis and gluconeogenesis; catalyzes conversion of fructose 1,6 bisphosphate to glyceraldehyde-3-P and dihydroxyacetone-P; locates to mitochondrial outer surface upon oxidative stress
YKL067W	R.NVC@HGSDSVDSAER.E	YNK1	2.474	766.823	-0.42	Nucleoside diphosphate kinase, catalyzes the transfer of gamma phosphates from nucleoside triphosphates, usually ATP, to nucleoside diphosphates by a mechanism that involves formation of an autophosphorylated enzyme intermediate
YKL077W	K.DIRSEPFC@TPYENSR.W	YKL077W	2.631	624.284	-0.41	Putative protein of unknown function; green fluorescent protein (GFP)-fusion protein localizes to the vacuole
YKL077W	R.C@TPNLYFNK.G	YKL077W	2.071	578.777	0.17	Putative protein of unknown function; green fluorescent protein (GFP)-fusion protein localizes to the vacuole
YKL081W	K.DVDAC@FVK.I	TEF4	2.583	477.224	0.3	Translation elongation factor EF-1 gamma
YKL092C	K.ELEQESC@LLYNR.I	BUD2	2.956	777.367	0.23	GTPase activating factor for Rsr1p/Bud1p required for both axial and bipolar budding patterns; mutants exhibit random budding in all cell types
YKL092C	K.SNNTVGDSYC@K.F	BUD2	2.598	622.765	0.47	GTPase activating factor for Rsr1p/Bud1p required for both axial and bipolar budding patterns; mutants exhibit random budding in all cell types
YKL103C	K.SALVDSTPLPVC@R.I	LAP4	3.309	707.872	0.28	Vacuolar aminopeptidase, often used as a marker protein in studies of autophagy and cytosol to vacuole targeting (CVT) pathway
YKL104C	K.SC@HYPNEVIATR.K	GFA1	3.311	482.898	-0.26	Glutamine-fructose-6-phosphate amidotransferase, catalyzes the formation of glucosamine-6-P and glutamate from fructose-6-P and glutamine in the first step of chitin biosynthesis
YKL104C	K.SC@HYPNEVIATRK.G	GFA1	2.28	394.449	-0.06	Glutamine-fructose-6-phosphate amidotransferase, catalyzes the formation of glucosamine-6-P and glutamate from fructose-6-P and glutamine in the first step of chitin biosynthesis
YKL113C	K.ELIEYLC@DDK.K	RAD27	2.707	649.302	-0.72	5' to 3' exonuclease, 5' flap endonuclease, required for Okazaki fragment processing and maturation as well as for long-patch base-excision repair; member of the S. pombe RAD2/FEN1 family
YKL127W	K.C@TGGGIILTASHNPGGPENDLGIK.Y	PGM1	3.477	793.398	1.59	Phosphoglucomutase, minor isoform; catalyzes the conversion from glucose-1-phosphate to glucose-6-phosphate, which is a key step in hexose metabolism
YKL127W	R.YDYEHIECE#QAEK.V	PGM1	2.677	571.907	0.36	Phosphoglucomutase, minor isoform; catalyzes the conversion from glucose-1-phosphate to glucose-6-phosphate, which is a key step in hexose metabolism
YKL129C	K.SYNENQC@VIISGESGAGK.T	MYO3	2.97	956.94	0.81	One of two type I myosins; localizes to actin cortical patches; deletion of MYO3 has little effect on growth, but myo3 myo5 double deletion causes severe defects in growth and actin cytoskeleton organization
YKL129C	K.VVC@DLIEAK.N	MYO3	2.891	523.781	0.35	One of two type I myosins; localizes to actin cortical patches; deletion of MYO3 has little effect on growth, but myo3 myo5 double deletion causes severe defects in growth and actin cytoskeleton organization
YKL129C	R.AFMGDYLSC@NESK.T	MYO3	3.301	769.318	-0.04	One of two type I myosins; localizes to actin cortical patches; deletion of MYO3 has little effect on growth, but myo3 myo5 double deletion causes severe defects in growth and actin cytoskeleton organization
YKL145W	R.LC@PNSTGAELR.S	RPT1	2.218	609.301	-0.13	One of six ATPases of the 19S regulatory particle of the 26S proteasome involved in the degradation of ubiquitinated substrates; required for optimal CDC20 transcription; interacts with Rpn12p and the E3 ubiquitin-protein ligase Ubr1p
YKL145W	R.SVC@TEAGMFAIR.A	RPT1	3.483	679.315	-0.16	One of six ATPases of the 19S regulatory particle of the 26S proteasome involved in the degradation of ubiquitinated substrates; required for optimal CDC20 transcription; interacts with Rpn12p and the E3 ubiquitin-protein ligase Ubr1p
YKL148C	K.DLACRD#VVSR.A	SDH1	2.155	397.536	0.24	Flavoprotein subunit of succinate dehydrogenase (Sdh1p, Sdh2p, Sdh3p, Sdh4p), which couples the oxidation of succinate to the transfer of electrons to ubiquinone
YKL151C	K.IC@EQEEKGESSNDKPLK.N	YKL151C	2.377	664.318	0.11	Putative protein of unknown function; green fluorescent protein (GFP)-fusion protein localizes to the cytoplasm
YKL157W	K.MFTDY#CSGNK.E	APE2	2.293	619.744	-0.44	Zinc-dependent metallopeptidase yscII, may have a role in obtaining leucine from dipeptide substrates; sequence coordinates have changed since RT-PCR analysis showed that the adjacent ORF YKL158W comprises the 5' exon of APE2/YKL157W
YKL157W	K.MFTDYC@SGNK.E	APE2	2.466	619.744	-0.23	Zinc-dependent metallopeptidase yscII, may have a role in obtaining leucine from dipeptide substrates; sequence coordinates have changed since RT-PCR analysis showed that the adjacent ORF YKL158W comprises the 5' exon of APE2/YKL157W
YKL160W	K.FNC@LFC@NHEK.S	ELF1	2.814	456.865	-0.7	Transcription elongation factor that contains a conserved zinc finger domain; implicated in the maintenance of proper chromatin structure in actively transcribed regions; deletion inhibits Brome mosaic virus (BMV) gene expression
YKL160W	K.IC@GQSFQTR.I	ELF1	2.941	548.764	-0.27	Transcription elongation factor that contains a conserved zinc finger domain; implicated in the maintenance of proper chromatin structure in actively transcribed regions; deletion inhibits Brome mosaic virus (BMV) gene expression
YKL160W	K.KNSIGTLSC@K.I	ELF1	2.849	554.295	-0.4	Transcription elongation factor that contains a conserved zinc finger domain; implicated in the maintenance of proper chromatin structure in actively transcribed regions; deletion inhibits Brome mosaic virus (BMV) gene expression
YKL160W	K.NSIGTLSC@K.I	ELF1	2.074	490.247	-0.07	Transcription elongation factor that contains a conserved zinc finger domain; implicated in the maintenance of proper chromatin structure in actively transcribed regions; deletion inhibits Brome mosaic virus (BMV) gene expression
YKL160W	K.SVSC@TLDK.K	ELF1	2.171	455.221	-0.47	Transcription elongation factor that contains a conserved zinc finger domain; implicated in the maintenance of proper chromatin structure in actively transcribed regions; deletion inhibits Brome mosaic virus (BMV) gene expression
YKL166C	K.TETTPDNVGQDIPVNAHSVHE#ECSSNTPVEINGR.N	TPK3	2.688	926.678	0.3	cAMP-dependent protein kinase catalytic subunit; promotes vegetative growth in response to nutrients via the Ras-cAMP signaling pathway; inhibited by regulatory subunit Bcy1p in the absence of cAMP; partially redundant with Tpk1p and Tpk2p
YKL170W	K.KGDIC@HAIVVR.S	MRPL38	3.297	423.236	-1.03	Mitochondrial ribosomal protein of the large subunit; appears as two protein spots (YmL34 and YmL38) on two-dimensional SDS gels
YKL170W	R.IMAND#GCVDR.T	MRPL38	3.136	583.75	-0.07	Mitochondrial ribosomal protein of the large subunit; appears as two protein spots (YmL34 and YmL38) on two-dimensional SDS gels
YKL170W	R.IMANDGC@VDR.T	MRPL38	3.274	575.752	-0.59	Mitochondrial ribosomal protein of the large subunit; appears as two protein spots (YmL34 and YmL38) on two-dimensional SDS gels
YKL181W	R.LGIEPAPC@TLKK.F	PRS1	2.899	663.876	0.04	5-phospho-ribosyl-1(alpha)-pyrophosphate synthetase, synthesizes PRPP, which is required for nucleotide, histidine, and tryptophan biosynthesis; one of five related enzymes, which are active as heteromultimeric complexes
YKL182W	K.C@IAAC@TGVPDDKWEQTYK.K	FAS1	2.596	714.659	-0.36	Beta subunit of fatty acid synthetase, which catalyzes the synthesis of long-chain saturated fatty acids; contains acetyltransacylase, dehydratase, enoyl reductase, malonyl transacylase, and palmitoyl transacylase activities
YKL182W	K.C]FGPIKVELPTK.E	FAS1	3.475	463.592	-0.23	Beta subunit of fatty acid synthetase, which catalyzes the synthesis of long-chain saturated fatty acids; contains acetyltransacylase, dehydratase, enoyl reductase, malonyl transacylase, and palmitoyl transacylase activities
YKL182W	K.C]IAAC@TGVPDDKWEQTYK.K	FAS1	3.526	1071.48	-0.86	Beta subunit of fatty acid synthetase, which catalyzes the synthesis of long-chain saturated fatty acids; contains acetyltransacylase, dehydratase, enoyl reductase, malonyl transacylase, and palmitoyl transacylase activities
YKL182W	K.EVYDFTHAVGNNC@EDFVSRPDR.T	FAS1	2.61	1314.08	0.89	Beta subunit of fatty acid synthetase, which catalyzes the synthesis of long-chain saturated fatty acids; contains acetyltransacylase, dehydratase, enoyl reductase, malonyl transacylase, and palmitoyl transacylase activities
YKL182W	K.KC@IAAC@TGVPDDKWEQTYK.K	FAS1	4.045	757.358	0.74	Beta subunit of fatty acid synthetase, which catalyzes the synthesis of long-chain saturated fatty acids; contains acetyltransacylase, dehydratase, enoyl reductase, malonyl transacylase, and palmitoyl transacylase activities
YKL182W	R.GYTC@QFVDMVLPNTALK.T	FAS1	4.766	986.978	-0.82	Beta subunit of fatty acid synthetase, which catalyzes the synthesis of long-chain saturated fatty acids; contains acetyltransacylase, dehydratase, enoyl reductase, malonyl transacylase, and palmitoyl transacylase activities
YKL182W	R.TC@ILHGPVAAQFTK.V	FAS1	3.64	514.942	0.25	Beta subunit of fatty acid synthetase, which catalyzes the synthesis of long-chain saturated fatty acids; contains acetyltransacylase, dehydratase, enoyl reductase, malonyl transacylase, and palmitoyl transacylase activities
YKL182W	R.VRGYTC@QFVDMVLPNTALK.T	FAS1	3.019	743.378	-0.42	Beta subunit of fatty acid synthetase, which catalyzes the synthesis of long-chain saturated fatty acids; contains acetyltransacylase, dehydratase, enoyl reductase, malonyl transacylase, and palmitoyl transacylase activities
YKL191W	K.I]CLMANAPFSK.H	DPH2	2.478	634.312	-0.58	Protein required, along with Dph1p, Kti11p, Jjj3p, and Dph5p, for synthesis of diphthamide, which is a modified histidine residue of translation elongation factor 2 (Eft1p or Eft2p); may act in a complex with Dph1p and Kti11p
YKL191W	K.IC@LMANAPFSK.H	DPH2	2.798	634.313	1.42	Protein required, along with Dph1p, Kti11p, Jjj3p, and Dph5p, for synthesis of diphthamide, which is a modified histidine residue of translation elongation factor 2 (Eft1p or Eft2p); may act in a complex with Dph1p and Kti11p
YKL194C	K.NVQQLDMC@TALQK.K	MST1	3.29	774.88	0.57	Mitochondrial threonyl-tRNA synthetase
YKL203C	K.C]QDASSAVASTALK.V	TOR2	3.103	704.841	0.17	PIK-related protein kinase and rapamycin target; subunit of TORC1, a complex that regulates growth in response to nutrients and TORC2, a complex that regulates cell-cycle dependent polarization of the actin cytoskeleton; involved in meiosis
YKL210W	K.INEFC@HSSGIR.F	UBA1	2.626	440.544	-0.02	Ubiquitin activating enzyme (E1), involved in ubiquitin-mediated protein degradation and essential for viability
YKL210W	K.NKSEVAAEAVC@AMNPDLK.G	UBA1	4.756	654.98	0.42	Ubiquitin activating enzyme (E1), involved in ubiquitin-mediated protein degradation and essential for viability
YKL210W	K.SEVAAEAVC@AMNPDLK.G	UBA1	3.603	860.897	-0.58	Ubiquitin activating enzyme (E1), involved in ubiquitin-mediated protein degradation and essential for viability
YKL210W	K.VFLVGSGAIGC@EMLK.N	UBA1	4.429	798.91	-0.26	Ubiquitin activating enzyme (E1), involved in ubiquitin-mediated protein degradation and essential for viability
YKL210W	R.C@VFYRKPLLESGTLGTK.G	UBA1	2.584	493.02	-0.04	Ubiquitin activating enzyme (E1), involved in ubiquitin-mediated protein degradation and essential for viability
YKL211C	K.FIHELC@E.-	TRP3	2.288	474.218	0.1	Bifunctional enzyme exhibiting both indole-3-glycerol-phosphate synthase and anthranilate synthase activities, forms multifunctional hetero-oligomeric anthranilate synthase:indole-3-glycerol phosphate synthase enzyme complex with Trp2p
YKL212W	R.TNC@MDC@LDR.T	SAC1	2.068	600.726	-0.03	Phosphatidylinositol (PI) phosphatase, involved in hydrolysis of PI 3-phosphate, PI 4-phosphate and PI 3,5-bisphosphate to PI; membrane protein localizes to ER and Golgi; involved in protein trafficking, secretion and inositol metabolism
YKL213C	K.YGPLEEYQEC@EEAAYR.L	DOA1	3.259	1003.93	0.47	WD repeat protein required for ubiquitin-mediated protein degradation, forms complex with Cdc48p, plays a role in controlling cellular ubiquitin concentration; also promotes efficient NHEJ in postdiauxic/stationary phase
YKL214C	R.TC@IYEFEDPEVLEK.I	YRA2	4.851	886.408	-0.41	Member of the REF (RNA and export factor binding proteins) family; when overexpressed, can substitute for the function of Yra1p in export of poly(A)+ mRNA from the nucleus
YKL215C	K.SILSGPAGGVIGYSSTC@YDK.N	YKL215C	4.481	1016.49	-0.41	Putative protein of unknown function; green fluorescent protein (GFP)-fusion protein localizes to the cytoplasm
YKL215C	K.TFNVMADSQGDC@NNFTFGTGGNSGNKTDK.Q	YKL215C	2.975	1034.1	-0.11	Putative protein of unknown function; green fluorescent protein (GFP)-fusion protein localizes to the cytoplasm
YKL215C	R.MGTTLATNC@ALER.N	YKL215C	4.007	727.342	-0.12	Putative protein of unknown function; green fluorescent protein (GFP)-fusion protein localizes to the cytoplasm
YKL216W	K.FLNNTYENPFMNASGVHC@MTTQELDELANSK.A	URA1	4.405	902.65	-0.09	Dihydroorotate dehydrogenase, catalyzes the fourth enzymatic step in the de novo biosynthesis of pyrimidines, converting dihydroorotic acid into orotic acid
YKL216W	K.FLNNTYENPFMNASGVHCMTTQE#LDELANSK.A	URA1	4.199	1197.86	-0.72	Dihydroorotate dehydrogenase, catalyzes the fourth enzymatic step in the de novo biosynthesis of pyrimidines, converting dihydroorotic acid into orotic acid
YKR001C	K.AHYC@GTPYLAK.K	VPS1	2.561	640.808	-0.34	Dynamin-like GTPase required for vacuolar sorting; also involved in actin cytoskeleton organization, late Golgi-retention of some proteins, regulating peroxisome biogenesis
YKR013W	K.S]CGGEWGDYIIC@SYK.A	PRY2	4.113	897.877	-0.18	Protein of unknown function, has similarity to Pry1p and Pry3p and to the plant PR-1 class of pathogen related proteins
YKR013W	K.SC@GGEWGDYIIC@SYK.A	PRY2	3.173	897.877	-0.18	Protein of unknown function, has similarity to Pry1p and Pry3p and to the plant PR-1 class of pathogen related proteins
YKR016W	R.LVEILDC@EIR.T	YKR016W	3.269	630.337	0.29	Protein of unknown function; non-tagged protein is detected in purified mitochondria in high-throughput studies; null mutant displays decreased frequency of mitochondrial genome loss and severe growth defect in minimal glycerol media
YKR018C	R.LGHIQEGC@DILDEK.V	YKR018C	3.387	813.894	0.45	Putative protein of unknown function; green fluorescent protein (GFP)-fusion protein localizes to the cytoplasm and nucleus
YKR023W	K.VVC@VIEGLNK.G	YKR023W	2.568	565.816	0.61	Putative protein of unknown function; the authentic, non-tagged protein is detected in highly purified mitochondria in high-throughput studies
YKR026C	R.AGC@DIFMR.F	GCN3	2.499	493.215	-0.63	Alpha subunit of the translation initiation factor eIF2B, the guanine-nucleotide exchange factor for eIF2; activity subsequently regulated by phosphorylated eIF2; first identified as a positive regulator of GCN4 expression
YKR031C	K.SGHGNSVDDGSTQC@GINEK.E	SPO14	2.347	654.613	-0.15	Phospholipase D, catalyzes the hydrolysis of phosphatidylcholine, producing choline and phosphatidic acid; involved in Sec14p-independent secretion; required for meiosis and spore formation; differently regulated in secretion and meiosis
YKR035W-A	R.QVSASMGQVC@K.G	DID2	3.186	597.784	-0.3	Class E protein of the vacuolar protein-sorting (Vps) pathway; binds Vps4p and directs it to dissociate ESCRT-III complexes; forms a functional and physical complex with Ist1p; human ortholog may be altered in breast tumors
YKR043C	K.K]CETIEEIQNVK.S	YKR043C	2.645	497.589	0.58	Putative protein of unknown function; green fluorescent protein (GFP)-fusion protein localizes to the cytoplasm and nucleus
YKR043C	K.KC@ETIEEIQNVK.S	YKR043C	2.884	745.879	-0.32	Putative protein of unknown function; green fluorescent protein (GFP)-fusion protein localizes to the cytoplasm and nucleus
YKR043C	R.DGC@ENGETTQQIGLR.L	YKR043C	4.118	839.378	-0.42	Putative protein of unknown function; green fluorescent protein (GFP)-fusion protein localizes to the cytoplasm and nucleus
YKR048C	R.FDSSANPFFTNDILC@K.T	NAP1	4.049	938.432	-0.31	Protein that interacts with mitotic cyclin Clb2p; required for the regulation of microtubule dynamics during mitosis; controls bud morphogenesis; involved in the transport of H2A and H2B histones to the nucleus; phosphorylated by CK2
YKR060W	K.NTSYIPNNDNC@LSVR.V	UTP30	2.514	883.91	-0.24	Possible U3 snoRNP protein involved in maturation of pre-18S rRNA, based on computational analysis of large-scale protein-protein interaction data
YKR062W	K.DGWPQC@DETINQLEEDSK.I	TFA2	3.214	1082.46	-1.03	TFIIE small subunit, involved in RNA polymerase II transcription initiation
YKR062W	K.DLKDGWPQC@DETINQLEEDSK.I	TFA2	2.927	840.711	-0.48	TFIIE small subunit, involved in RNA polymerase II transcription initiation
YKR071C	K.VGGC@GSC@SLGDAFR.C	DRE2	4.335	721.811	-0.58	Protein of unknown function required for sister chromatid cohesion; mutation displays synthetic lethal interaction with the pol3-13 allele of CDC2
YKR080W	K.C]SLDSDVVITGVPSENYK.F	MTD1	3.567	991.972	-0.02	NAD-dependent 5,10-methylenetetrahydrafolate dehydrogenase, plays a catalytic role in oxidation of cytoplasmic one-carbon units; expression is regulated by Bas1p and Bas2p, repressed by adenine, and may be induced by inositol and choline
YKR080W	K.C]SLDSDVVITGVPSENYKFPTEYIK.E	MTD1	3.783	954.469	0	NAD-dependent 5,10-methylenetetrahydrafolate dehydrogenase, plays a catalytic role in oxidation of cytoplasmic one-carbon units; expression is regulated by Bas1p and Bas2p, repressed by adenine, and may be induced by inositol and choline
YKR080W	K.EGAVC@INFAC@TK.N	MTD1	3.74	685.316	-0.08	NAD-dependent 5,10-methylenetetrahydrafolate dehydrogenase, plays a catalytic role in oxidation of cytoplasmic one-carbon units; expression is regulated by Bas1p and Bas2p, repressed by adenine, and may be induced by inositol and choline
YKR080W	K.EGAVC@INFACTK.N	MTD1	2.6	656.806	1.57	NAD-dependent 5,10-methylenetetrahydrafolate dehydrogenase, plays a catalytic role in oxidation of cytoplasmic one-carbon units; expression is regulated by Bas1p and Bas2p, repressed by adenine, and may be induced by inositol and choline
YKR081C	K.QALFIPGQSC@NK.N	RPF2	2.505	681.845	-0.21	Essential protein involved in the processing of pre-rRNA and the assembly of the 60S ribosomal subunit; interacts with ribosomal protein L11; localizes predominantly to the nucleolus; constituent of 66S pre-ribosomal particles
YKR095W	K.LVEC@ENDLQTLTK.Q	MLP1	3.961	781.89	-0.19	Myosin-like protein associated with the nuclear envelope, connects the nuclear pore complex with the nuclear interior; involved with Tel1p in telomere length control; involved with Pml1p and Pml39p in nuclear retention of unspliced mRNAs
YKR095W	K.THETLNEYVSCK#.S	MLP1	2.654	494.229	-0.14	Myosin-like protein associated with the nuclear envelope, connects the nuclear pore complex with the nuclear interior; involved with Tel1p in telomere length control; involved with Pml1p and Pml39p in nuclear retention of unspliced mRNAs
YLL010C	R.E#ACYNYEGNYIK.N	PSR1	2.698	762.327	-0.21	Plasma membrane associated protein phosphatase involved in the general stress response; required along with binding partner Whi2p for full activation of STRE-mediated gene expression, possibly through dephosphorylation of Msn2p
YLL010C	R.EAC@YNYEGNYIK.N	PSR1	2.878	762.327	-0.39	Plasma membrane associated protein phosphatase involved in the general stress response; required along with binding partner Whi2p for full activation of STRE-mediated gene expression, possibly through dephosphorylation of Msn2p
YLL011W	K.SQNFMLSCSD#DK.T	SOF1	2.897	716.296	-1.61	Essential protein required for biogenesis of 40S (small) ribosomal subunit; has similarity to the beta subunit of trimeric G-proteins and the splicing factor Prp4p
YLL015W	K.A]CQLLPDLK.I	BPT1	2.543	529.289	0.28	ABC type transmembrane transporter of MRP/CFTR family, found in vacuolar membrane, involved in the transport of unconjugated bilirubin and in heavy metal detoxification via glutathione conjugates, along with Ycf1p
YLL018C	K.DYC@DGFSYGC@PPHAGGGIGLER.V	DPS1	3.263	795.672	-0.18	Cytoplasmic aspartyl-tRNA synthetase, homodimeric enzyme that catalyzes the specific aspartylation of tRNA(Asp); class II aminoacyl tRNA synthetase; binding to its own mRNA may confer autoregulation
YLL018C	R.IQAGVC@ELFR.E	DPS1	3.249	596.811	0.54	Cytoplasmic aspartyl-tRNA synthetase, homodimeric enzyme that catalyzes the specific aspartylation of tRNA(Asp); class II aminoacyl tRNA synthetase; binding to its own mRNA may confer autoregulation
YLL026W	K.SNPC@LIGEPGIGK.T	HSP104	2.95	671.345	0.17	Heat shock protein that cooperates with Ydj1p (Hsp40) and Ssa1p (Hsp70) to refold and reactivate previously denatured, aggregated proteins; responsive to stresses including: heat, ethanol, and sodium arsenite; involved in [PSI+] propagation
YLL026W	K.SRDENVPEEAEECLE#VLPNHEATIGADTLGDDDNEDSMEIDDDLD.-	HSP104	3.458	1262.53	0.52	Heat shock protein that cooperates with Ydj1p (Hsp40) and Ssa1p (Hsp70) to refold and reactivate previously denatured, aggregated proteins; responsive to stresses including: heat, ethanol, and sodium arsenite; involved in [PSI+] propagation
YLL026W	R.I]KSNPCLIGEPGIGK.T	HSP104	2.576	528.292	-0.14	Heat shock protein that cooperates with Ydj1p (Hsp40) and Ssa1p (Hsp70) to refold and reactivate previously denatured, aggregated proteins; responsive to stresses including: heat, ethanol, and sodium arsenite; involved in [PSI+] propagation
YLL026W	R.VDC@SELSEK.Y	HSP104	3.02	533.739	-0.58	Heat shock protein that cooperates with Ydj1p (Hsp40) and Ssa1p (Hsp70) to refold and reactivate previously denatured, aggregated proteins; responsive to stresses including: heat, ethanol, and sodium arsenite; involved in [PSI+] propagation
YLL029W	K.FENMTVVPYC@R.K	FRA1	2.676	716.323	0.01	Protein involved in negative regulation of transcription of iron regulon; forms an iron independent complex with Fra2p, Grx3p, and Grx4p; cytosolic; mutant fails to repress transcription of iron regulon and is defective in spore formation
YLL029W	R.C]LNTSTNANGAIAK.K	FRA1	2.527	717.854	-0.08	Protein involved in negative regulation of transcription of iron regulon; forms an iron independent complex with Fra2p, Grx3p, and Grx4p; cytosolic; mutant fails to repress transcription of iron regulon and is defective in spore formation
YLL029W	R.C]LNTSTNANGAIAKK.M	FRA1	3.087	521.603	-0.37	Protein involved in negative regulation of transcription of iron regulon; forms an iron independent complex with Fra2p, Grx3p, and Grx4p; cytosolic; mutant fails to repress transcription of iron regulon and is defective in spore formation
YLL029W	R.GTSASHSPRPFRPC@ADC@TC@SPGLLSR.Q	FRA1	2.786	719.335	-0.67	Protein involved in negative regulation of transcription of iron regulon; forms an iron independent complex with Fra2p, Grx3p, and Grx4p; cytosolic; mutant fails to repress transcription of iron regulon and is defective in spore formation
YLL029W	R.QNEDPITWQEWC@VR.E	FRA1	3.737	930.92	-0.37	Protein involved in negative regulation of transcription of iron regulon; forms an iron independent complex with Fra2p, Grx3p, and Grx4p; cytosolic; mutant fails to repress transcription of iron regulon and is defective in spore formation
YLL040C	K.DC@LDSLNLPIDVK.S	VPS13	3.42	751.382	0.47	Protein of unknown function; heterooligomeric or homooligomeric complex; peripherally associated with membranes; homologous to human COH1; involved in sporulation, vacuolar protein sorting and protein-Golgi retention
YLL040C	K.LVDILC@QR.L	VPS13	2.307	508.782	1.08	Protein of unknown function; heterooligomeric or homooligomeric complex; peripherally associated with membranes; homologous to human COH1; involved in sporulation, vacuolar protein sorting and protein-Golgi retention
YLL040C	K.NILGVC@VSGQNYK.T	VPS13	4.393	726.37	1.1	Protein of unknown function; heterooligomeric or homooligomeric complex; peripherally associated with membranes; homologous to human COH1; involved in sporulation, vacuolar protein sorting and protein-Golgi retention
YLL041C	R.EGIC@GSC@AMNIGGR.N	SDH2	2.477	749.316	-0.1	Iron-sulfur protein subunit of succinate dehydrogenase (Sdh1p, Sdh2p, Sdh3p, Sdh4p), which couples the oxidation of succinate to the transfer of electrons to ubiquinone
YLL041C	R.NTLAC@IC@K.I	SDH2	2.099	490.238	-0.54	Iron-sulfur protein subunit of succinate dehydrogenase (Sdh1p, Sdh2p, Sdh3p, Sdh4p), which couples the oxidation of succinate to the transfer of electrons to ubiquinone
YLL048C	K.AVVEAC@GLKR.D	YBT1	2.318	551.806	-0.02	Transporter of the ATP-binding cassette (ABC) family involved in bile acid transport; similar to mammalian bile transporters
YLR006C	K.FDNQADNTSSNNTNDNSC@R.S	SSK1	1.736	1087.43	0.99	Cytoplasmic response regulator, part of a two-component signal transducer that mediates osmosensing via a phosphorelay mechanism; dephosphorylated form is degraded by the ubiquitin-proteasome system; potential Cdc28p substrate
YLR006C	K.FDNQADNTSSNNTNDNSCR[.S	SSK1	2.725	1087.43	1.55	Cytoplasmic response regulator, part of a two-component signal transducer that mediates osmosensing via a phosphorelay mechanism; dephosphorylated form is degraded by the ubiquitin-proteasome system; potential Cdc28p substrate
YLR015W	K.LGYYPTISC@FNGGTAR.I	BRE2	2.594	888.923	1.16	Subunit of the COMPASS (Set1C) complex, which methylates histone H3 on lysine 4 and is required in transcriptional silencing near telomeres; involved in telomere maintenance; similar to trithorax-group protein ASH2L
YLR017W	K.DMTVVC@MEGPQFSTR.A	MEU1	3.581	895.381	0.18	Methylthioadenosine phosphorylase (MTAP), catalyzes the initial step in the methionine salvage pathway; affects polyamine biosynthesis through regulation of ornithine decarboxylase (Spe1p) activity; regulates ADH2 gene expression
YLR017W	K.NEITNPESEEPCHLH#YDK.D	MEU1	2.365	553.746	0.34	Methylthioadenosine phosphorylase (MTAP), catalyzes the initial step in the methionine salvage pathway; affects polyamine biosynthesis through regulation of ornithine decarboxylase (Spe1p) activity; regulates ADH2 gene expression
YLR027C	K.LSTVSPVFVC@QSFAK.N	AAT2	3.209	835.435	0.17	Cytosolic aspartate aminotransferase, involved in nitrogen metabolism; localizes to peroxisomes in oleate-grown cells
YLR027C	R.VGC@FHLALTK.Q	AAT2	2.126	382.543	-0.32	Cytosolic aspartate aminotransferase, involved in nitrogen metabolism; localizes to peroxisomes in oleate-grown cells
YLR028C	K.VLCGTPGY#INLLDALNSWPLVK.E	ADE16	2.703	815.107	0.28	Enzyme of 'de novo' purine biosynthesis containing both 5-aminoimidazole-4-carboxamide ribonucleotide transformylase and inosine monophosphate cyclohydrolase activities, isozyme of Ade17p; ade16 ade17 mutants require adenine and histidine
YLR028C	K.YC@ILQIDPNYVPGQMESR.E	ADE16	2.965	733.679	0.46	Enzyme of 'de novo' purine biosynthesis containing both 5-aminoimidazole-4-carboxamide ribonucleotide transformylase and inosine monophosphate cyclohydrolase activities, isozyme of Ade17p; ade16 ade17 mutants require adenine and histidine
YLR028C	K.YTQSNSVC@YAK.N	ADE16	3.446	660.798	-0.27	Enzyme of 'de novo' purine biosynthesis containing both 5-aminoimidazole-4-carboxamide ribonucleotide transformylase and inosine monophosphate cyclohydrolase activities, isozyme of Ade17p; ade16 ade17 mutants require adenine and histidine
YLR028C	R.QVYFVNDMEDLSPLACAYAR[.A	ADE16	3.524	788.033	0.32	Enzyme of 'de novo' purine biosynthesis containing both 5-aminoimidazole-4-carboxamide ribonucleotide transformylase and inosine monophosphate cyclohydrolase activities, isozyme of Ade17p; ade16 ade17 mutants require adenine and histidine
YLR029C	R.YNWICDPVHK.H	RPL15A	3.38	425.538	-0.02	Protein component of the large (60S) ribosomal subunit, nearly identical to Rpl15Bp and has similarity to rat L15 ribosomal protein; binds to 5.8 S rRNA
YLR044C	K.DAKNPVILAD#ACC@SR.H	PDC1	2.232	845.406	-0.07	Major of three pyruvate decarboxylase isozymes, key enzyme in alcoholic fermentation, decarboxylates pyruvate to acetaldehyde; subject to glucose-, ethanol-, and autoregulation; involved in amino acid catabolism
YLR044C	K.DAKNPVILADAC@C@SR.H	PDC1	3.091	845.406	-0.45	Major of three pyruvate decarboxylase isozymes, key enzyme in alcoholic fermentation, decarboxylates pyruvate to acetaldehyde; subject to glucose-, ethanol-, and autoregulation; involved in amino acid catabolism
YLR044C	K.DAKNPVILADAC@CSR.H	PDC1	3.635	544.933	0.06	Major of three pyruvate decarboxylase isozymes, key enzyme in alcoholic fermentation, decarboxylates pyruvate to acetaldehyde; subject to glucose-, ethanol-, and autoregulation; involved in amino acid catabolism
YLR044C	K.DAKNPVILADACCSR[.H	PDC1	3.331	544.932	-0.48	Major of three pyruvate decarboxylase isozymes, key enzyme in alcoholic fermentation, decarboxylates pyruvate to acetaldehyde; subject to glucose-, ethanol-, and autoregulation; involved in amino acid catabolism
YLR044C	K.NPVILAD#ACCSRH#DVK.A	PDC1	2.91	618.97	-0.37	Major of three pyruvate decarboxylase isozymes, key enzyme in alcoholic fermentation, decarboxylates pyruvate to acetaldehyde; subject to glucose-, ethanol-, and autoregulation; involved in amino acid catabolism
YLR044C	K.NPVILADAC@C@SR.H	PDC1	3.256	688.327	1.15	Major of three pyruvate decarboxylase isozymes, key enzyme in alcoholic fermentation, decarboxylates pyruvate to acetaldehyde; subject to glucose-, ethanol-, and autoregulation; involved in amino acid catabolism
YLR044C	K.NPVILADAC@CSR.H	PDC1	4.382	659.816	0.24	Major of three pyruvate decarboxylase isozymes, key enzyme in alcoholic fermentation, decarboxylates pyruvate to acetaldehyde; subject to glucose-, ethanol-, and autoregulation; involved in amino acid catabolism
YLR044C	K.NPVILADACC@SR.H	PDC1	4.83	659.816	0.52	Major of three pyruvate decarboxylase isozymes, key enzyme in alcoholic fermentation, decarboxylates pyruvate to acetaldehyde; subject to glucose-, ethanol-, and autoregulation; involved in amino acid catabolism
YLR044C	K.NPVILADACC@SR[.H	PDC1	2.507	688.327	0.2	Major of three pyruvate decarboxylase isozymes, key enzyme in alcoholic fermentation, decarboxylates pyruvate to acetaldehyde; subject to glucose-, ethanol-, and autoregulation; involved in amino acid catabolism
YLR044C	K.NPVILADACCSR.H	PDC1	3.762	631.306	1.49	Major of three pyruvate decarboxylase isozymes, key enzyme in alcoholic fermentation, decarboxylates pyruvate to acetaldehyde; subject to glucose-, ethanol-, and autoregulation; involved in amino acid catabolism
YLR058C	K.GVDGARVEYIC@EK.I	SHM2	3.684	748.364	-0.31	Cytosolic serine hydroxymethyltransferase, converts serine to glycine plus 5,10 methylenetetrahydrofolate; major isoform involved in generating precursors for purine, pyrimidine, amino acid, and lipid biosynthesis
YLR058C	K.VLVAGTSAYC@R.L	SHM2	3.121	598.808	0.19	Cytosolic serine hydroxymethyltransferase, converts serine to glycine plus 5,10 methylenetetrahydrofolate; major isoform involved in generating precursors for purine, pyrimidine, amino acid, and lipid biosynthesis
YLR058C	R.EKGVDGARVEYICE#K.I	SHM2	2.381	438.97	-0.1	Cytosolic serine hydroxymethyltransferase, converts serine to glycine plus 5,10 methylenetetrahydrofolate; major isoform involved in generating precursors for purine, pyrimidine, amino acid, and lipid biosynthesis
YLR058C	R.MEILC@QQR.A	SHM2	3.21	539.263	0.1	Cytosolic serine hydroxymethyltransferase, converts serine to glycine plus 5,10 methylenetetrahydrofolate; major isoform involved in generating precursors for purine, pyrimidine, amino acid, and lipid biosynthesis
YLR058C	R.VEYIC@EK.I	SHM2	2.182	470.726	0.37	Cytosolic serine hydroxymethyltransferase, converts serine to glycine plus 5,10 methylenetetrahydrofolate; major isoform involved in generating precursors for purine, pyrimidine, amino acid, and lipid biosynthesis
YLR058C	R.YYGGNEHIDRMEILC@QQR.A	SHM2	1.869	571.267	0.23	Cytosolic serine hydroxymethyltransferase, converts serine to glycine plus 5,10 methylenetetrahydrofolate; major isoform involved in generating precursors for purine, pyrimidine, amino acid, and lipid biosynthesis
YLR060W	K.DRVC@SLPPLINSEHSK.I	FRS1	3.301	617.984	-0.46	Beta subunit of cytoplasmic phenylalanyl-tRNA synthetase, forms a tetramer with Frs2p to generate active enzyme; sequence is evolutionarily distant from mitochondrial phenylalanyl-tRNA synthetase (Msf1p), but substrate binding is similar
YLR060W	R.VC@SLPPLINSEHSK.I	FRS1	1.89	527.608	-0.51	Beta subunit of cytoplasmic phenylalanyl-tRNA synthetase, forms a tetramer with Frs2p to generate active enzyme; sequence is evolutionarily distant from mitochondrial phenylalanyl-tRNA synthetase (Msf1p), but substrate binding is similar
YLR060W	R.YC@DEPFTVEPVEIVSEHNGQSR.L	FRS1	3.518	864.727	-0.41	Beta subunit of cytoplasmic phenylalanyl-tRNA synthetase, forms a tetramer with Frs2p to generate active enzyme; sequence is evolutionarily distant from mitochondrial phenylalanyl-tRNA synthetase (Msf1p), but substrate binding is similar
YLR069C	K.GFEEVC@EK.G	MEF1	2.533	499.218	-0.71	Mitochondrial elongation factor involved in translational elongation
YLR075W	K.ATVDEFPLC@VHLVSNELEQLSSEALEAAR.I	RPL10	4.721	1076.54	0.86	Protein component of the large (60S) ribosomal subunit, responsible for joining the 40S and 60S subunits; regulates translation initiation; has similarity to rat L10 ribosomal protein and to members of the QM gene family
YLR075W	K.MLSC@AGADR.L	RPL10	2.287	498.716	0.42	Protein component of the large (60S) ribosomal subunit, responsible for joining the 40S and 60S subunits; regulates translation initiation; has similarity to rat L10 ribosomal protein and to members of the QM gene family
YLR075W	K.MLSC@AGADRLQQGMR.G	RPL10	2.462	575.933	0.16	Protein component of the large (60S) ribosomal subunit, responsible for joining the 40S and 60S subunits; regulates translation initiation; has similarity to rat L10 ribosomal protein and to members of the QM gene family
YLR075W	R.IC@ANKYMTTVSGR.D	RPL10	3.918	500.915	0.15	Protein component of the large (60S) ribosomal subunit, responsible for joining the 40S and 60S subunits; regulates translation initiation; has similarity to rat L10 ribosomal protein and to members of the QM gene family
YLR077W	K.NSQCD#PIK.I	YLR077W	2.342	481.224	0.46	Putative protein of unknown function; the authentic, non-tagged protein is detected in highly purified mitochondria in high-throughput studies
YLR084C	K.N]CGEFC@PLYSR.A	RAX2	3.408	701.797	-0.85	N-glycosylated protein involved in the maintenance of bud site selection during bipolar budding; localization requires Rax1p
YLR089C	K.LLESTGIC@TVPGSGFGQEPGTYHLR.T	ALT1	4.288	892.774	-0.25	Putative alanine transaminase (glutamic pyruvic transaminase); the authentic, non-tagged protein is detected in highly purified mitochondria in high-throughput studies
YLR089C	R.HLELTPDEFYC@K.K	ALT1	2.837	776.362	1.06	Putative alanine transaminase (glutamic pyruvic transaminase); the authentic, non-tagged protein is detected in highly purified mitochondria in high-throughput studies
YLR090W	K.GMADEEIDKTTC@GDLK.F	XDJ1	2.67	600.266	0.65	Putative chaperone, homolog of E. coli DnaJ, closely related to Ydj1p; the authentic, non-tagged protein is detected in highly purified mitochondria in high-throughput studies
YLR093C	K.NGETISSC@FQPFQK.N	NYV1	3.036	821.88	-0.28	v-SNARE component of the vacuolar SNARE complex involved in vesicle fusion; inhibits ATP-dependent Ca(2+) transport activity of Pmc1p in the vacuolar membrane
YLR104W	K.C@VLPDNK.F	YLR104W	1.926	423.213	-0.24	Putative protein of unknown function; mutant is deficient in amounts of cell wall mannosylphosphate
YLR104W	R.DC@GWVSDAYK.N	YLR104W	2.761	600.753	-0.05	Putative protein of unknown function; mutant is deficient in amounts of cell wall mannosylphosphate
YLR109W	K.FASDPGC@AFTK.S	AHP1	3.472	600.771	-0.01	Thiol-specific peroxiredoxin, reduces hydroperoxides to protect against oxidative damage; function in vivo requires covalent conjugation to Urm1p
YLR109W	K.FQYIAISQSDADSE#SCKMPQTVEWSK.L	AHP1	4.226	1012.46	-0.19	Thiol-specific peroxiredoxin, reduces hydroperoxides to protect against oxidative damage; function in vivo requires covalent conjugation to Urm1p
YLR109W	K.FQYIAISQSDADSESC@K.M	AHP1	5.988	974.933	-0.29	Thiol-specific peroxiredoxin, reduces hydroperoxides to protect against oxidative damage; function in vivo requires covalent conjugation to Urm1p
YLR109W	K.FQYIAISQSDADSESC@KMPQTVEWSK.L	AHP1	3.729	1017.8	0.28	Thiol-specific peroxiredoxin, reduces hydroperoxides to protect against oxidative damage; function in vivo requires covalent conjugation to Urm1p
YLR109W	K.FQYIAISQSDADSESCK#MPQTVEWSK.L	AHP1	4.169	1017.79	-0.33	Thiol-specific peroxiredoxin, reduces hydroperoxides to protect against oxidative damage; function in vivo requires covalent conjugation to Urm1p
YLR109W	K.FQYIAISQSDADSESCK.M	AHP1	4.689	946.425	2.43	Thiol-specific peroxiredoxin, reduces hydroperoxides to protect against oxidative damage; function in vivo requires covalent conjugation to Urm1p
YLR114C	K.KSNEEGGANDAAIGNC@VQDEEKL.-	AVL9	3.476	816.703	0.61	Conserved protein involved in exocytic transport from the Golgi; mutation is synthetically lethal with apl2 vps1 double mutation; member of a protein superfamily with orthologs in diverse organisms
YLR114C	K.SNEEGGANDAAIGNC@VQDEEKL.-	AVL9	2.988	1160.5	0.14	Conserved protein involved in exocytic transport from the Golgi; mutation is synthetically lethal with apl2 vps1 double mutation; member of a protein superfamily with orthologs in diverse organisms
YLR118C	K.QFYQDSC@EIQNYEFK.V	YLR118C	5.249	999.93	-0.59	Acyl-protein thioesterase responsible for depalmitoylation of Gpa1p; green fluorescent protein (GFP)-fusion protein localizes to both the cytoplasm and nucleus and is induced in response to the DNA-damaging agent MMS
YLR126C	R.QC@QELDNNGIQAAR.N	YLR126C	2.738	808.875	-0.73	Putative protein of unknown function with similarity to glutamine amidotransferase proteins; has Aft1p-binding motif in the promoter; may be involved in copper and iron homeostasis; YLR126C is not an essential protein
YLR153C	K.LNASYNC@VDR.H	ACS2	3.458	606.277	-0.49	Acetyl-coA synthetase isoform which, along with Acs1p, is the nuclear source of acetyl-coA for histone acetylation; mutants affect global transcription; required for growth on glucose; expressed under anaerobic conditions
YLR153C	K.VVITC@DEGK.R	ACS2	2.187	510.755	-0.01	Acetyl-coA synthetase isoform which, along with Acs1p, is the nuclear source of acetyl-coA for histone acetylation; mutants affect global transcription; required for growth on glucose; expressed under anaerobic conditions
YLR153C	R.TYLPPVSCD#AEDPLFLLYTSGSTGSPK.G	ACS2	3.89	972.473	1.33	Acetyl-coA synthetase isoform which, along with Acs1p, is the nuclear source of acetyl-coA for histone acetylation; mutants affect global transcription; required for growth on glucose; expressed under anaerobic conditions
YLR167W	K.DRLYC@GKC@HSVYK.V	RPS31	2.602	422.202	-0.46	Fusion protein that is cleaved to yield a ribosomal protein of the small (40S) subunit and ubiquitin; ubiquitin may facilitate assembly of the ribosomal protein into ribosomes; interacts genetically with translation factor eIF2B
YLR167W	R.LYCGK#CH#SVYK.V	RPS31	2.547	472.225	-0.37	Fusion protein that is cleaved to yield a ribosomal protein of the small (40S) subunit and ubiquitin; ubiquitin may facilitate assembly of the ribosomal protein into ribosomes; interacts genetically with translation factor eIF2B
YLR167W	R.REC@SNPTC@GAGVFLANHK.D	RPS31	6.035	673.315	-0.74	Fusion protein that is cleaved to yield a ribosomal protein of the small (40S) subunit and ubiquitin; ubiquitin may facilitate assembly of the ribosomal protein into ribosomes; interacts genetically with translation factor eIF2B
YLR172C	R.YMSIAQC@CE#QLLEIEEK.R	DPH5	3.762	1080.49	-0.31	Methyltransferase required for synthesis of diphthamide, which is a modified histidine residue of translation elongation factor 2 (Eft1p or Eft2p); not essential for viability; GFP-Dph5p fusion protein localizes to the cytoplasm
YLR175W	K.DSAVNAVC@YGAK.L	CBF5	4.21	627.793	-0.22	Pseudouridine synthase catalytic subunit of box H/ACA small nucleolar ribonucleoprotein particles (snoRNPs), acts on both large and small rRNAs and on snRNA U2
YLR175W	K.EYVC@IVR.L	CBF5	1.951	469.742	-0.33	Pseudouridine synthase catalytic subunit of box H/ACA small nucleolar ribonucleoprotein particles (snoRNPs), acts on both large and small rRNAs and on snRNA U2
YLR178C	K.WSEFC@HLVECD#LK.L	TFS1	3.175	574.925	-0.35	Carboxypeptidase Y inhibitor, function requires acetylation by the NatB N-terminal acetyltransferase; phosphatidylethanolamine-binding protein involved in protein kinase A signaling pathway
YLR178C	K.WSEFCH#LVEC@DLK.L	TFS1	2.528	574.925	0.24	Carboxypeptidase Y inhibitor, function requires acetylation by the NatB N-terminal acetyltransferase; phosphatidylethanolamine-binding protein involved in protein kinase A signaling pathway
YLR179C	R.YVFFLC@K.Q	YLR179C	1.907	488.752	0.19	Protein of unknown function, transcription is activated by paralogous proteins Yrm1p and Yrr1p along with proteins involved in multidrug resistance; GFP-tagged protein localizes to the cytoplasm and nucleus; YLR179C is not essential
YLR180W	K.IC@DQVSDAILDAC@LAEDPHSK.V	SAM1	4.011	786.363	-0.73	S-adenosylmethionine synthetase, catalyzes transfer of the adenosyl group of ATP to the sulfur atom of methionine; one of two differentially regulated isozymes (Sam1p and Sam2p)
YLR180W	K.TC@NVLVAIEQQSPDIAQGVHEEK.D	SAM1	2.722	855.759	-0.11	S-adenosylmethionine synthetase, catalyzes transfer of the adenosyl group of ATP to the sulfur atom of methionine; one of two differentially regulated isozymes (Sam1p and Sam2p)
YLR185W	K.TC@SSC@GYPAAK.T	RPL37A	2.629	601.252	-0.05	Protein component of the large (60S) ribosomal subunit, has similarity to Rpl37Bp and to rat L37 ribosomal protein
YLR185W	K.TCSSCGY#PAAK.T	RPL37A	2.624	572.741	-1.08	Protein component of the large (60S) ribosomal subunit, has similarity to Rpl37Bp and to rat L37 ribosomal protein
YLR186W	K.VGLSNYPLSASVAC@SK.F	EMG1	2.491	826.919	0.01	Member of the alpha/beta knot fold methyltransferase superfamily; required for maturation of 18S rRNA and for 40S ribosome production; interacts with RNA and with S-adenosylmethionine; associates with spindle/microtubules; forms homodimers
YLR197W	R.QLYDYLC@EK.M	SIK1	2.679	616.287	0.78	Essential evolutionarily-conserved nucleolar protein component of the box C/D snoRNP complexes that direct 2'-O-methylation of pre-rRNA during its maturation; overexpression causes spindle orientation defects
YLR199C	K.C]LVAPSEGPNGFEK.L	PBA1	2.46	752.859	0.26	Protein involved in 20S proteasome assembly; forms a heterodimer with Add66p that binds to proteasome precursors; similar to human PAC1 constituent of the PAC1-PAC2 complex involved in proteasome assembly
YLR203C	K.DINYTC@PLSGIPTHHSR.E	MSS51	3.437	492.74	-0.35	Nuclear encoded protein required for translation of COX1 mRNA; binds to Cox1 protein
YLR208W	K.FGTILASCSY#DGK.V	SEC13	3.37	709.834	-1.56	Component of both the Nup84 nuclear pore sub-complex and of the COPII complex (Sar1p, Sec13p, Sec16p, Sec23p, Sec24p, Sec31p, Sfb2p, and Sfb3p) which is important for the formation of ER to Golgi transport vesicles
YLR208W	R.TC@IIWTQDNEQGPWK.K	SEC13	3.591	938.437	-1.9	Component of both the Nup84 nuclear pore sub-complex and of the COPII complex (Sar1p, Sec13p, Sec16p, Sec23p, Sec24p, Sec31p, Sfb2p, and Sfb3p) which is important for the formation of ER to Golgi transport vesicles
YLR216C	K.I]DDCGVLPDDYQVPENAEATPTDEYGDNYEDVLKQDEK.V	CPR6	3.272	1090.73	-0.79	Peptidyl-prolyl cis-trans isomerase (cyclophilin), catalyzes the cis-trans isomerization of peptide bonds N-terminal to proline residues; binds to Hsp82p and contributes to chaperone activity
YLR216C	K.IDD#CGVLPDDYQVPENAEATPTDEYGDNYEDVLKQDEK.V	CPR6	3.394	1090.73	0.28	Peptidyl-prolyl cis-trans isomerase (cyclophilin), catalyzes the cis-trans isomerization of peptide bonds N-terminal to proline residues; binds to Hsp82p and contributes to chaperone activity
YLR216C	K.IDDC@GVLPDDYQVPENAEATPTDEYGDNYEDVLKQDEKVDLK.N	CPR6	3.183	1204.55	-0.22	Peptidyl-prolyl cis-trans isomerase (cyclophilin), catalyzes the cis-trans isomerization of peptide bonds N-terminal to proline residues; binds to Hsp82p and contributes to chaperone activity
YLR216C	K.L]CEGNAGMAK.T	CPR6	1.665	533.736	-0.09	Peptidyl-prolyl cis-trans isomerase (cyclophilin), catalyzes the cis-trans isomerization of peptide bonds N-terminal to proline residues; binds to Hsp82p and contributes to chaperone activity
YLR216C	K.LC@EGNAGMAK.T	CPR6	1.928	533.737	0.39	Peptidyl-prolyl cis-trans isomerase (cyclophilin), catalyzes the cis-trans isomerization of peptide bonds N-terminal to proline residues; binds to Hsp82p and contributes to chaperone activity
YLR216C	K.VSIPLNIAIC@ALK.L	CPR6	1.879	706.421	0.36	Peptidyl-prolyl cis-trans isomerase (cyclophilin), catalyzes the cis-trans isomerization of peptide bonds N-terminal to proline residues; binds to Hsp82p and contributes to chaperone activity
YLR216C	R.LIENQQCD#QENNKPLRDVK.I	CPR6	2.738	781.057	-0.28	Peptidyl-prolyl cis-trans isomerase (cyclophilin), catalyzes the cis-trans isomerization of peptide bonds N-terminal to proline residues; binds to Hsp82p and contributes to chaperone activity
YLR222C	K.D#CTEQEIEEEQEK.A	UTP13	3.745	833.841	0.49	Nucleolar protein, component of the small subunit (SSU) processome containing the U3 snoRNA that is involved in processing of pre-18S rRNA
YLR222C	K.IWDC@SSGEC@LK.T	UTP13	2.886	677.792	0.55	Nucleolar protein, component of the small subunit (SSU) processome containing the U3 snoRNA that is involved in processing of pre-18S rRNA
YLR222C	K.QLISCGAD#GLIK.I	UTP13	2.941	637.843	0.96	Nucleolar protein, component of the small subunit (SSU) processome containing the U3 snoRNA that is involved in processing of pre-18S rRNA
YLR222C	K.TLPVNQQVESC@GFLK.D	UTP13	2.635	860.44	-0.39	Nucleolar protein, component of the small subunit (SSU) processome containing the U3 snoRNA that is involved in processing of pre-18S rRNA
YLR225C	K.LEWFC@R.T	YLR225C	1.895	455.716	0.06	Putative protein of unknown function; green fluorescent protein (GFP)-fusion protein localizes to the cytoplasm; YLR225C is not an essential gene
YLR229C	K.C@VVVGDGAVGK.T	CDC42	2.495	530.776	-0.37	Small rho-like GTPase, essential for establishment and maintenance of cell polarity; mutants have defects in the organization of actin and septins
YLR229C	K.YVEC@SALTQR.G	CDC42	2.921	613.795	-0.08	Small rho-like GTPase, essential for establishment and maintenance of cell polarity; mutants have defects in the organization of actin and septins
YLR231C	K.GSFPSDYYAFYNQCK#.I	BNA5	3.154	923.89	-0.48	Kynureninase, required for the de novo biosynthesis of NAD from tryptophan via kynurenine; expression regulated by Hst1p
YLR231C	K.SMGLSSDDKPVTYLC@GNSLGLMPK.S	BNA5	3.199	862.747	0.79	Kynureninase, required for the de novo biosynthesis of NAD from tryptophan via kynurenine; expression regulated by Hst1p
YLR244C	K.C]PVC@LK.Q	MAP1	2.441	388.693	-0.11	Methionine aminopeptidase, catalyzes the cotranslational removal of N-terminal methionine from nascent polypeptides; function is partially redundant with that of Map2p
YLR244C	K.IYC@SGLQC@GR.E	MAP1	3.552	607.276	0.02	Methionine aminopeptidase, catalyzes the cotranslational removal of N-terminal methionine from nascent polypeptides; function is partially redundant with that of Map2p
YLR244C	K.M]CKPGTTFQELGDHIEK.H	MAP1	2.975	498.489	-0.02	Methionine aminopeptidase, catalyzes the cotranslational removal of N-terminal methionine from nascent polypeptides; function is partially redundant with that of Map2p
YLR244C	K.MCK#PGTTFQELGDHIEK.H	MAP1	2.926	502.488	-0.17	Methionine aminopeptidase, catalyzes the cotranslational removal of N-terminal methionine from nascent polypeptides; function is partially redundant with that of Map2p
YLR244C	K.QGIVSIFC@DTSC@YENNYK.A	MAP1	4.692	1099.48	-0.91	Methionine aminopeptidase, catalyzes the cotranslational removal of N-terminal methionine from nascent polypeptides; function is partially redundant with that of Map2p
YLR249W	K.EIE#EHCSMLGLDPEIVSHSR.I	YEF3	4.523	785.362	-1.04	Translational elongation factor 3, stimulates the binding of aminoacyl-tRNA (AA-tRNA) to ribosomes by releasing EF-1 alpha from the ribosomal complex; contains two ABC cassettes; binds and hydrolyses ATP
YLR249W	K.RAVDNIPVGPNFDDEEDEGEDLC@NC@EFSLAYGAK.I	YEF3	5.333	1282.56	-0.5	Translational elongation factor 3, stimulates the binding of aminoacyl-tRNA (AA-tRNA) to ribosomes by releasing EF-1 alpha from the ribosomal complex; contains two ABC cassettes; binds and hydrolyses ATP
YLR249W	K.SAVIIDNMC@K.L	YEF3	3.035	583.781	-0.4	Translational elongation factor 3, stimulates the binding of aminoacyl-tRNA (AA-tRNA) to ribosomes by releasing EF-1 alpha from the ribosomal complex; contains two ABC cassettes; binds and hydrolyses ATP
YLR249W	K.STLINVLTGELLPTSGEVY#THENCR.I	YEF3	2.157	935.136	0.21	Translational elongation factor 3, stimulates the binding of aminoacyl-tRNA (AA-tRNA) to ribosomes by releasing EF-1 alpha from the ribosomal complex; contains two ABC cassettes; binds and hydrolyses ATP
YLR249W	K.VTNMEFQYPGTSKPQITDINFQC@SLSSR.I	YEF3	2.647	1083.52	-0.61	Translational elongation factor 3, stimulates the binding of aminoacyl-tRNA (AA-tRNA) to ribosomes by releasing EF-1 alpha from the ribosomal complex; contains two ABC cassettes; binds and hydrolyses ATP
YLR249W	R.AIANGQVDGFPTQEEC@R.T	YEF3	4.744	946.438	4.95	Translational elongation factor 3, stimulates the binding of aminoacyl-tRNA (AA-tRNA) to ribosomes by releasing EF-1 alpha from the ribosomal complex; contains two ABC cassettes; binds and hydrolyses ATP
YLR249W	R.AIANGQVDGFPTQEECR.T	YEF3	3.835	917.923	-0.34	Translational elongation factor 3, stimulates the binding of aminoacyl-tRNA (AA-tRNA) to ribosomes by releasing EF-1 alpha from the ribosomal complex; contains two ABC cassettes; binds and hydrolyses ATP
YLR249W	R.AIANGQVDGFPTQEECR[.T	YEF3	4.062	631.291	-0.2	Translational elongation factor 3, stimulates the binding of aminoacyl-tRNA (AA-tRNA) to ribosomes by releasing EF-1 alpha from the ribosomal complex; contains two ABC cassettes; binds and hydrolyses ATP
YLR249W	R.AVDNIPVGPNFDDEEDEGEDLC@NC@EFSLAYGAK.I	YEF3	3.95	1230.52	0.23	Translational elongation factor 3, stimulates the binding of aminoacyl-tRNA (AA-tRNA) to ribosomes by releasing EF-1 alpha from the ribosomal complex; contains two ABC cassettes; binds and hydrolyses ATP
YLR249W	R.KEIEEH#CSMLGLDPEIVSHSR.I	YEF3	3.753	822.73	-0.11	Translational elongation factor 3, stimulates the binding of aminoacyl-tRNA (AA-tRNA) to ribosomes by releasing EF-1 alpha from the ribosomal complex; contains two ABC cassettes; binds and hydrolyses ATP
YLR249W	R.KEIEEHC@SMLGLDPEIVSHSR.I	YEF3	3.162	621.298	0.04	Translational elongation factor 3, stimulates the binding of aminoacyl-tRNA (AA-tRNA) to ribosomes by releasing EF-1 alpha from the ribosomal complex; contains two ABC cassettes; binds and hydrolyses ATP
YLR249W	R.KSAVIIDNMC@K.L	YEF3	3.353	639.831	-0.11	Translational elongation factor 3, stimulates the binding of aminoacyl-tRNA (AA-tRNA) to ribosomes by releasing EF-1 alpha from the ribosomal complex; contains two ABC cassettes; binds and hydrolyses ATP
YLR249W	R.KSAVIIDNMCK[.L	YEF3	2.449	647.828	-0.78	Translational elongation factor 3, stimulates the binding of aminoacyl-tRNA (AA-tRNA) to ribosomes by releasing EF-1 alpha from the ribosomal complex; contains two ABC cassettes; binds and hydrolyses ATP
YLR249W	R.RYGIC@GPNGC@GK.S	YEF3	4.366	669.805	-0.38	Translational elongation factor 3, stimulates the binding of aminoacyl-tRNA (AA-tRNA) to ribosomes by releasing EF-1 alpha from the ribosomal complex; contains two ABC cassettes; binds and hydrolyses ATP
YLR249W	R.RYGIC@GPNGCGK.S	YEF3	2.792	641.295	0.29	Translational elongation factor 3, stimulates the binding of aminoacyl-tRNA (AA-tRNA) to ribosomes by releasing EF-1 alpha from the ribosomal complex; contains two ABC cassettes; binds and hydrolyses ATP
YLR249W	R.YGIC@GPNGC@GK.S	YEF3	3.04	591.755	0.19	Translational elongation factor 3, stimulates the binding of aminoacyl-tRNA (AA-tRNA) to ribosomes by releasing EF-1 alpha from the ribosomal complex; contains two ABC cassettes; binds and hydrolyses ATP
YLR249W	R.YGICGPNGCGK[.S	YEF3	3.037	563.244	0.01	Translational elongation factor 3, stimulates the binding of aminoacyl-tRNA (AA-tRNA) to ribosomes by releasing EF-1 alpha from the ribosomal complex; contains two ABC cassettes; binds and hydrolyses ATP
YLR257W	R.GSTPC@LIGDSIR.N	YLR257W	2.415	638.322	0.82	Putative protein of unknown function
YLR259C	K.NVAAGC@NPMDLR.R	HSP60	3.461	667.303	-0.09	Tetradecameric mitochondrial chaperonin required for ATP-dependent folding of precursor polypeptides and complex assembly; prevents aggregation and mediates protein refolding after heat shock; role in mtDNA transmission; phosphorylated
YLR259C	K.NVAAGCNPMD#LR.R	HSP60	2.389	667.303	-0.31	Tetradecameric mitochondrial chaperonin required for ATP-dependent folding of precursor polypeptides and complex assembly; prevents aggregation and mediates protein refolding after heat shock; role in mtDNA transmission; phosphorylated
YLR268W	K.STLIYREDGLPLC@TSVDNENDPSLFEQK.Q	SEC22	3.457	1080.85	-0.18	R-SNARE protein; assembles into SNARE complex with Bet1p, Bos1p and Sed5p; cycles between the ER and Golgi complex; involved in anterograde and retrograde transport between the ER and Golgi; synaptobrevin homolog
YLR270W	K.RIVQPYIEE#MCNNGR.L	DCS1	2.752	626.969	-1.05	Non-essential hydrolase involved in mRNA decapping, may function in a feedback mechanism to regulate deadenylation, contains pyrophosphatase activity and a HIT (histidine triad) motif; interacts with neutral trehalase Nth1p
YLR270W	R.IVQPYIEEMC@NNGR.L	DCS1	3.584	861.901	0.8	Non-essential hydrolase involved in mRNA decapping, may function in a feedback mechanism to regulate deadenylation, contains pyrophosphatase activity and a HIT (histidine triad) motif; interacts with neutral trehalase Nth1p
YLR270W	R.IVQPYIEEMCNNGR[.L	DCS1	3.2	869.898	-0.54	Non-essential hydrolase involved in mRNA decapping, may function in a feedback mechanism to regulate deadenylation, contains pyrophosphatase activity and a HIT (histidine triad) motif; interacts with neutral trehalase Nth1p
YLR271W	K.YKDEGDLYEH#CPGVNEDDHK.-	YLR271W	2.97	605.758	-0.04	Putative protein of unknown function; green fluorescent protein (GFP)-fusion protein localizes to the cytoplasm and the nucleus and is induced in response to the DNA-damaging agent MMS
YLR276C	K.S]CILNSELPVNSR.Q	DBP9	3.511	744.878	0.6	ATP-dependent RNA helicase of the DEAD-box family involved in biogenesis of the 60S ribosomal subunit
YLR286C	K.STC@TEGEIAC@SADGK.F	CTS1	3.619	793.327	-0.2	Endochitinase, required for cell separation after mitosis; transcriptional activation during late G and early M cell cycle phases is mediated by transcription factor Ace2p
YLR287C	K.IFNAC@DSLSNC@SK.A	YLR287C	3.208	758.333	1.12	Putative protein of unknown function; green fluorescent protein (GFP)-fusion protein localizes to the cytoplasm; YLR287C is not an essential gene
YLR293C	R.V]CENIPIVLCGNK[.V	GSP1	3.085	758.386	-0.42	GTP binding protein (mammalian Ranp homolog) involved in the maintenance of nuclear organization, RNA processing and transport; regulated by Prp20p, Rna1p, Yrb1p, Yrb2p, Yrp4p, Yrb30p, Cse1p and Kap95p; yeast Gsp2p homolog
YLR293C	R.VC@ENIPIVLC@GNKVDVKER.K	GSP1	3.334	561.298	0.53	GTP binding protein (mammalian Ranp homolog) involved in the maintenance of nuclear organization, RNA processing and transport; regulated by Prp20p, Rna1p, Yrb1p, Yrb2p, Yrp4p, Yrb30p, Cse1p and Kap95p; yeast Gsp2p homolog
YLR293C	R.VC@ENIPIVLCGNKVDVK#ER.K	GSP1	4.171	561.298	0.33	GTP binding protein (mammalian Ranp homolog) involved in the maintenance of nuclear organization, RNA processing and transport; regulated by Prp20p, Rna1p, Yrb1p, Yrb2p, Yrp4p, Yrb30p, Cse1p and Kap95p; yeast Gsp2p homolog
YLR300W	R.TNDDNDEGIPVDEYHFC@QYLGK.D	EXG1	2.272	877.043	-0.31	Major exo-1,3-beta-glucanase of the cell wall, involved in cell wall beta-glucan assembly; exists as three differentially glycosylated isoenzymes
YLR300W	R.YDGSWVNGDQTSSYIGSC@ANNDDIAYWSDERK.E	EXG1	3.601	1225.19	1.28	Major exo-1,3-beta-glucanase of the cell wall, involved in cell wall beta-glucan assembly; exists as three differentially glycosylated isoenzymes
YLR301W	K.NWDSGC@VEETGAVYPFGADK.E	YLR301W	3.329	1101.48	-0.52	Protein of unknown function that interacts with Sec72p
YLR301W	K.NWDSGC@VEETGAVYPFGADKESVSFR.E	YLR301W	4.341	969.768	0.44	Protein of unknown function that interacts with Sec72p
YLR304C	R.VGLIGSC@TNSSYEDMSR.S	ACO1	4.018	946.411	-0.44	Aconitase, required for the tricarboxylic acid (TCA) cycle and also independently required for mitochondrial genome maintenance; phosphorylated; component of the mitochondrial nucleoid; mutation leads to glutamate auxotrophy
YLR314C	K.C]NLIPVIAK.S	CDC3	2.382	514.302	0	Component of the septin ring of the mother-bud neck that is required for cytokinesis; septins recruit proteins to the neck and can act as a barrier to diffusion at the membrane, and they comprise the 10nm filaments seen with EM
YLR316C	K.LTSGDGYC@MNDNK.Q	TAD3	2.603	737.801	0.64	Subunit of tRNA-specific adenosine-34 deaminase, forms a heterodimer with Tad2p that converts adenosine to inosine at the wobble position of several tRNAs
YLR330W	R.HVAIDTTHFVC@NDLDNEESNEELIR.A	CHS5	3.438	990.789	-0.69	Component of the exomer complex, which also contains Csh6p, Bch1p, Bch2p, and Bud7p and is involved in export of selected proteins, such as chitin synthase Chs3p, from the Golgi to the plasma membrane
YLR342W	R.IYSALIDGHC@EILDNGR.R	FKS1	3.46	649.319	-0.22	Catalytic subunit of 1,3-beta-D-glucan synthase, functionally redundant with alternate catalytic subunit Gsc2p; binds to regulatory subunit Rho1p; involved in cell wall synthesis and maintenance; localizes to sites of cell wall remodeling
YLR347C	K.ETTAWC@IGR.I	KAP95	2.435	547.258	0.1	Karyopherin beta, forms a dimeric complex with Srp1p (Kap60p) that mediates nuclear import of cargo proteins via a nuclear localization signal (NLS), interacts with nucleoporins to guide transport across the nuclear pore complex
YLR351C	R.AVDNQVYVMLC@SPAR.N	NIT3	3.352	869.917	1.09	Nit protein, one of two proteins in S. cerevisiae with similarity to the Nit domain of NitFhit from fly and worm and to the mouse and human Nit protein which interacts with the Fhit tumor suppressor; nitrilase superfamily member
YLR355C	K.YGMDYMYDAC@STTAR.R	ILV5	3.179	918.847	-0.3	Acetohydroxyacid reductoisomerase, mitochondrial protein involved in branched-chain amino acid biosynthesis, also required for maintenance of wild-type mitochondrial DNA and found in mitochondrial nucleoids
YLR355C	K.YGMDYMYDAC@STTARR.G	ILV5	2.971	659.602	-0.51	Acetohydroxyacid reductoisomerase, mitochondrial protein involved in branched-chain amino acid biosynthesis, also required for maintenance of wild-type mitochondrial DNA and found in mitochondrial nucleoids
YLR355C	K.YGMDYMYDACSTTAR.R	ILV5	3.004	890.337	0.04	Acetohydroxyacid reductoisomerase, mitochondrial protein involved in branched-chain amino acid biosynthesis, also required for maintenance of wild-type mitochondrial DNA and found in mitochondrial nucleoids
YLR357W	K.MQRDDLGEYATSDDC@PR.Y	RSC2	3.88	682.283	0.11	Component of the RSC chromatin remodeling complex; required for expression of mid-late sporulation-specific genes; involved in telomere maintenance
YLR357W	R.DDLGEYATSDDC@PR.Y	RSC2	3.797	807.323	-0.2	Component of the RSC chromatin remodeling complex; required for expression of mid-late sporulation-specific genes; involved in telomere maintenance
YLR359W	R.CE#RVC@SLAR.H	ADE13	2.317	575.777	0.14	Adenylosuccinate lyase, catalyzes two steps in the 'de novo' purine nucleotide biosynthetic pathway; expression is repressed by adenine and activated by Bas1p and Pho2p; mutations in human ortholog ADSL cause adenylosuccinase deficiency
YLR380W	R.VQLSTALC@ENYSK.L	CSR1	3.949	756.871	-0.48	Phosphatidylinositol transfer protein with a potential role in regulating lipid and fatty acid metabolism under heme-depleted conditions; interacts specifically with thioredoxin peroxidase; may have a role in oxidative stress resistance
YLR384C	K.GKHPSIVCE#FPK.S	IKI3	2.744	466.911	-0.48	Subunit of Elongator complex, which is required for modification of wobble nucleosides in tRNA; maintains structural integrity of Elongator; homolog of human IKAP, mutations in which cause familial dysautonomia (FD)
YLR384C	R.GDC@DYFAVSSVEEVPDEDDETK.S	IKI3	2.439	836.008	0.18	Subunit of Elongator complex, which is required for modification of wobble nucleosides in tRNA; maintains structural integrity of Elongator; homolog of human IKAP, mutations in which cause familial dysautonomia (FD)
YLR384C	R.GDCDY#FAVSSVEEVPDEDDETK.S	IKI3	3.011	1253.51	0.57	Subunit of Elongator complex, which is required for modification of wobble nucleosides in tRNA; maintains structural integrity of Elongator; homolog of human IKAP, mutations in which cause familial dysautonomia (FD)
YLR384C	R.VVEGLC@R.R	IKI3	1.842	416.721	-0.1	Subunit of Elongator complex, which is required for modification of wobble nucleosides in tRNA; maintains structural integrity of Elongator; homolog of human IKAP, mutations in which cause familial dysautonomia (FD)
YLR386W	R.QRENSNFC@DSNSDISQR.S	VAC14	2.341	686.295	-0.88	Protein involved in regulated synthesis of PtdIns(3,5)P(2), in control of trafficking of some proteins to the vacuole lumen via the MVB, and in maintenance of vacuole size and acidity; interacts with Fig4p; activator of Fab1p
YLR388W	K.YGLNIC@R.Q	RPS29A	2.336	448.227	0.48	Protein component of the small (40S) ribosomal subunit; nearly identical to Rps29Bp and has similarity to rat S29 and E. coli S14 ribosomal proteins
YLR388W	K.YGLNICR.Q	RPS29A	2.478	419.716	0.02	Protein component of the small (40S) ribosomal subunit; nearly identical to Rps29Bp and has similarity to rat S29 and E. coli S14 ribosomal proteins
YLR388W	R.KYGLNIC@R.Q	RPS29A	2.645	512.274	0.02	Protein component of the small (40S) ribosomal subunit; nearly identical to Rps29Bp and has similarity to rat S29 and E. coli S14 ribosomal proteins
YLR388W	R.VC@SSHTGLIR.K	RPS29A	2.289	565.293	-0.29	Protein component of the small (40S) ribosomal subunit; nearly identical to Rps29Bp and has similarity to rat S29 and E. coli S14 ribosomal proteins
YLR390W-A	K.C@LDSIC@PNNDADAAYSAFK.S	CCW14	3.72	1066.46	-0.35	Covalently linked cell wall glycoprotein, present in the inner layer of the cell wall
YLR390W-A	K.KC@LDSIC@PNNDADAAYSAFK.S	CCW14	3.828	754.005	0.12	Covalently linked cell wall glycoprotein, present in the inner layer of the cell wall
YLR398C	K.C]PNLSQHIVPK.F	SKI2	2.943	431.564	-0.31	Putative RNA helicase, involved in exosome mediated 3' to 5' mRNA degradation and translation inhibition of non-poly(A) mRNAs; forms complex with Ski3p and Ski8p; required for repressing propagation of dsRNA viruses
YLR398C	K.SC@EIC@DNDIEK.F	SKI2	2.66	691.782	-0.01	Putative RNA helicase, involved in exosome mediated 3' to 5' mRNA degradation and translation inhibition of non-poly(A) mRNAs; forms complex with Ski3p and Ski8p; required for repressing propagation of dsRNA viruses
YLR401C	K.C@SFGDNC@R.F	DUS3	2.448	508.19	-0.1	Dihydrouridine synthase, member of a widespread family of conserved proteins including Smm1p, Dus1p, and Dus4p; contains a consensus oleate response element (ORE) in its promoter region
YLR401C	K.EQNVLC@PR.L	DUS3	1.763	508.253	0.01	Dihydrouridine synthase, member of a widespread family of conserved proteins including Smm1p, Dus1p, and Dus4p; contains a consensus oleate response element (ORE) in its promoter region
YLR401C	R.C@LNAMNYVSK.D	DUS3	2.477	600.281	-0.13	Dihydrouridine synthase, member of a widespread family of conserved proteins including Smm1p, Dus1p, and Dus4p; contains a consensus oleate response element (ORE) in its promoter region
YLR410W	K.AYYDSC@ANILR.S	VIP1	3.078	673.315	1.12	Inositol hexakisphosphate (IP6) and inositol heptakisphosphate (IP7) kinase; generation of IP7 by Vip1p is important for phosphate signaling; likely involved in cortical actin cytoskeleton function, by analogy with S. pombe ortholog asp1
YLR410W	K.IGVC@AMDAK.V	VIP1	2.544	482.733	0.05	Inositol hexakisphosphate (IP6) and inositol heptakisphosphate (IP7) kinase; generation of IP7 by Vip1p is important for phosphate signaling; likely involved in cortical actin cytoskeleton function, by analogy with S. pombe ortholog asp1
YLR410W	R.ETPAC@VAYFTK.E	VIP1	2.759	643.808	-0.31	Inositol hexakisphosphate (IP6) and inositol heptakisphosphate (IP7) kinase; generation of IP7 by Vip1p is important for phosphate signaling; likely involved in cortical actin cytoskeleton function, by analogy with S. pombe ortholog asp1
YLR410W	R.WC@TSEDPSLFK.E	VIP1	2.979	685.308	-0.23	Inositol hexakisphosphate (IP6) and inositol heptakisphosphate (IP7) kinase; generation of IP7 by Vip1p is important for phosphate signaling; likely involved in cortical actin cytoskeleton function, by analogy with S. pombe ortholog asp1
YLR412W	K.LC@ENYPNLSK.L	BER1	2.748	619.298	-0.24	Protein involved in microtubule-related processes, N-acetylation; GFP-fusion protein localizes to the cytoplasm and is induced in response to the DNA-damaging agent MMS; YLR412W is not an essential gene; similar to Arabidopsis SRR1 gene
YLR414C	K.IYC@AELDLSQMK.V	YLR414C	3.345	743.849	-0.96	Putative protein of unknown function; green fluorescent protein (GFP)-fusion protein localizes to the bud and cytoplasm; Hog1p is required for transcriptional induction in response to cell wall damage; YLR414C is not an essential gene
YLR418C	K.DSSAADYLADC@QNK.Q	CDC73	3.87	779.328	-0.13	Constituent of Paf1 complex with RNA polymerase II, Paf1p, Hpr1p, Ctr9, Leo1, Rtf1 and Ccr4p, distinct from Srb-containing Pol II complexes; required for expression of certain genes, modification of some histones, and telomere maintenance
YLR419W	R.C]VTC@GEEVGYVIR.G	YLR419W	3.193	771.357	-0.67	Putative helicase with limited sequence similarity to human Rb protein; the authentic, non-tagged protein is detected in highly purified mitochondria in high-throughput studies; YLR419W is not an essential gene
YLR420W	R.EGAMC@ELVTPK.I	URA4	2.444	625.791	-0.18	Dihydroorotase, catalyzes the third enzymatic step in the de novo biosynthesis of pyrimidines, converting carbamoyl-L-aspartate into dihydroorotate
YLR421C	R.AGVC@EYNEDSR.L	RPN13	3.055	650.267	-0.15	Subunit of the 19S regulatory particle of the 26S proteasome lid; acts as a ubiquitin receptor for the proteasome
YLR427W	R.LLVDDRFDYPEQNC@NPNVPVDQEK.I	MAG2	2.799	968.788	0.61	Cytoplasmic protein of unknown function predicted to encode a DNA-3-methyladenine glycosidase II that catalyzes the hydrolysis of alkylated DNA
YLR432W	K.FIPYLYNGLQHSC@QDIGYK.S	IMD3	4.592	1158.56	1.28	Inosine monophosphate dehydrogenase, catalyzes the first step of GMP biosynthesis, member of a four-gene family in S. cerevisiae, constitutively expressed
YLR432W	K.FIPYLYNGLQHSCQD#IGYK.S	IMD3	3.011	1158.56	0.88	Inosine monophosphate dehydrogenase, catalyzes the first step of GMP biosynthesis, member of a four-gene family in S. cerevisiae, constitutively expressed
YLR432W	K.QLLC@GAAIGTIDADK.E	IMD3	4.293	773.398	-3.22	Inosine monophosphate dehydrogenase, catalyzes the first step of GMP biosynthesis, member of a four-gene family in S. cerevisiae, constitutively expressed
YLR432W	K.QLLC@GAAIGTIDADKER.L	IMD3	2.957	915.974	1.82	Inosine monophosphate dehydrogenase, catalyzes the first step of GMP biosynthesis, member of a four-gene family in S. cerevisiae, constitutively expressed
YLR438W	R.TGELLC@YDHYK.A	CAR2	3.089	466.883	-0.17	L-ornithine transaminase (OTAse), catalyzes the second step of arginine degradation, expression is dually-regulated by allophanate induction and a specific arginine induction process; not nitrogen catabolite repression sensitive
YLR441C	R.VVEVC@LADLQGSEDHSFR.K	RPS1A	2.57	687.662	-0.29	Ribosomal protein 10 (rp10) of the small (40S) subunit; nearly identical to Rps1Bp and has similarity to rat S3a ribosomal protein
YLR441C	R.VVEVC@LADLQGSEDHSFRK.I	RPS1A	3.129	548.022	0.74	Ribosomal protein 10 (rp10) of the small (40S) subunit; nearly identical to Rps1Bp and has similarity to rat S3a ribosomal protein
YLR447C	K.NC@FDTAEELDDMNIEIIR.N	VMA6	4.302	1107.49	2.06	Subunit d of the five-subunit V0 integral membrane domain of vacuolar H+-ATPase (V-ATPase), an electrogenic proton pump found in the endomembrane system; stabilizes VO subunits; required for V1 domain assembly on the vacuolar membrane
YLR455W	R.TGDLVLC@K.V	YLR455W	2.836	453.242	0.77	Putative protein of unknown function; green fluorescent protein (GFP)-fusion protein localizes to the nucleus; deletion confers sensitivity to 4-(N-(S-glutathionylacetyl)amino) phenylarsenoxide (GSAO)
YLR457C	K.MQNVC@GDMTR.I	NBP1	2.102	606.252	-0.12	Spindle pole body (SPB) component, required for the insertion of the duplication plaque into the nuclear membrane during SPB duplication; essential for bipolar spindle formation; component of the Mps2p-Bbp1p complex
YML004C	K.ASNDPTLLLNHTC@LR.V	GLO1	2.567	862.941	0.19	Monomeric glyoxalase I, catalyzes the detoxification of methylglyoxal (a by-product of glycolysis) via condensation with glutathione to produce S-D-lactoylglutathione; expression regulated by methylglyoxal levels and osmotic stress
YML007W	K.YSDIDVDGLC@SELMAK.A	YAP1	3.558	916.411	2.89	Basic leucine zipper (bZIP) transcription factor required for oxidative stress tolerance; activated by H2O2 through the multistep formation of disulfide bonds and transit from the cytoplasm to the nucleus; mediates resistance to cadmium
YML008C	K.AGIQRGDLVLDVGC@GVGGPAR.E	ERG6	2.731	689.697	0.45	Delta(24)-sterol C-methyltransferase, converts zymosterol to fecosterol in the ergosterol biosynthetic pathway by methylating position C-24; localized to both lipid particles and mitochondrial outer membrane
YML008C	K.VYAIEATC@HAPKLEGVYSEIYK.V	ERG6	2.844	847.761	-0.33	Delta(24)-sterol C-methyltransferase, converts zymosterol to fecosterol in the ergosterol biosynthetic pathway by methylating position C-24; localized to both lipid particles and mitochondrial outer membrane
YML008C	K.VYAIEATCH#APKLEGVYSEIYK.V	ERG6	3.775	847.761	-0.8	Delta(24)-sterol C-methyltransferase, converts zymosterol to fecosterol in the ergosterol biosynthetic pathway by methylating position C-24; localized to both lipid particles and mitochondrial outer membrane
YML008C	R.F]TGCNVIGLNNNDYQIAK.A	ERG6	3.41	1020.99	-0.38	Delta(24)-sterol C-methyltransferase, converts zymosterol to fecosterol in the ergosterol biosynthetic pathway by methylating position C-24; localized to both lipid particles and mitochondrial outer membrane
YML008C	R.GDLVLDVGC@GVGGPAR.E	ERG6	4.255	771.391	0.65	Delta(24)-sterol C-methyltransferase, converts zymosterol to fecosterol in the ergosterol biosynthetic pathway by methylating position C-24; localized to both lipid particles and mitochondrial outer membrane
YML010W	K.FC@NGVPDIYISQK.L	SPT5	3.224	770.877	-0.25	Protein that forms a complex with Spt4p and mediates both activation and inhibition of transcription elongation; Spt4p-Spt5p complex also plays a role in pre-mRNA processing
YML014W	R.SDGLIEC@AR.G	TRM9	2.627	510.742	-0.3	tRNA methyltransferase, catalyzes esterification of modified uridine nucleotides in tRNAs, creating 5-methylcarbonylmethyluridine in tRNA(Arg3) and 5-methylcarbonylmethyl-2-thiouridine in tRNA(Glu); deletion confers resistance to zymocin
YML014W	R.SDGLIECAR[.G	TRM9	2.126	510.742	-0.55	tRNA methyltransferase, catalyzes esterification of modified uridine nucleotides in tRNAs, creating 5-methylcarbonylmethyluridine in tRNA(Arg3) and 5-methylcarbonylmethyl-2-thiouridine in tRNA(Glu); deletion confers resistance to zymocin
YML022W	K.AGKLPGEC@FK.A	APT1	2.447	369.527	-0.42	Adenine phosphoribosyltransferase, catalyzes the formation of AMP from adenine and 5-phosphoribosylpyrophosphate; involved in the salvage pathway of purine nucleotide biosynthesis
YML022W	K.LPGEC@FK.A	APT1	1.852	425.71	-0.16	Adenine phosphoribosyltransferase, catalyzes the formation of AMP from adenine and 5-phosphoribosylpyrophosphate; involved in the salvage pathway of purine nucleotide biosynthesis
YML022W	R.KAGKLPGEC@FK.A	APT1	3.455	412.225	-0.35	Adenine phosphoribosyltransferase, catalyzes the formation of AMP from adenine and 5-phosphoribosylpyrophosphate; involved in the salvage pathway of purine nucleotide biosynthesis
YML035C	K.LSNVDMC@ELAR.N	AMD1	2.828	662.305	-0.97	AMP deaminase, tetrameric enzyme that catalyzes the deamination of AMP to form IMP and ammonia; may be involved in regulation of intracellular adenine nucleotide pools
YML035C	K.TGIVQSFQDIC@K.N	AMD1	3.567	698.35	-0.34	AMP deaminase, tetrameric enzyme that catalyzes the deamination of AMP to form IMP and ammonia; may be involved in regulation of intracellular adenine nucleotide pools
YML036W	R.LVC@SGEQMYSAIYK.T	CGI121	3.502	832.884	-3.54	Protein involved in telomere uncapping and elongation as component of the KEOPS protein complex with Bud32p, Kae1p, Pcc1p, and Gon7p; also shown to be a component of the EKC protein complex; homolog of human CGI-121
YML050W	R.AQNDQTNC@YC@QEINAR.L	YML050W	1.869	992.915	0.02	Putative protein of unknown function; non-essential gene; null mutant displays increased frequency of mitochondrial genome loss (petite formation)
YML056C	K.FGFSGFPVTEDGKC@PGK.L	IMD4	3.602	915.43	0.21	Inosine monophosphate dehydrogenase, catalyzes the first step of GMP biosynthesis, member of a four-gene family in S. cerevisiae, constitutively expressed
YML056C	K.QLLC@GAAIGTIEADKER.L	IMD4	2.993	615.656	-0.02	Inosine monophosphate dehydrogenase, catalyzes the first step of GMP biosynthesis, member of a four-gene family in S. cerevisiae, constitutively expressed
YML058W	R.C]QQQQAPSTLR.T	SML1	3.405	658.822	-0.19	Ribonucleotide reductase inhibitor involved in regulating dNTP production; regulated by Mec1p and Rad53p during DNA damage and S phase
YML067C	R.SFFDESDPNKAHLPEFNGC@HVFGSIPVNR.V	ERV41	3.34	830.14	-1.52	Protein localized to COPII-coated vesicles, forms a complex with Erv46p; involved in the membrane fusion stage of transport; has homology to human ERGIC2 (PTX1) protein
YML070W	K.IINDNLVTIGSSLD#HCK.V	DAK1	2.085	633.66	-0.01	Dihydroxyacetone kinase, required for detoxification of dihydroxyacetone (DHA); involved in stress adaptation
YML070W	K.SEPHITELDNQVGDGDC@GYTLVAGVK.G	DAK1	5.749	925.435	-1.42	Dihydroxyacetone kinase, required for detoxification of dihydroxyacetone (DHA); involved in stress adaptation
YML070W	K.SGAEQVIKSEPHITELDNQVGDGDC@GYTLVAGVK.G	DAK1	4.707	897.438	-0.54	Dihydroxyacetone kinase, required for detoxification of dihydroxyacetone (DHA); involved in stress adaptation
YML070W	R.ALGINC@R.V	DAK1	1.631	402.213	-0.24	Dihydroxyacetone kinase, required for detoxification of dihydroxyacetone (DHA); involved in stress adaptation
YML072C	K.ANNDGVAVFDEEC@SFK.A	TCB3	3.879	901.388	-0.57	Lipid-binding protein, localized to the bud via specific mRNA transport; non-tagged protein detected in a phosphorylated state in mitochondria; GFP-fusion protein localizes to the cell periphery; C-termini of Tcb1p, Tcb2p and Tcb3p interact
YML072C	K.YLDTTSSMTGSLSPCAE#LFIDGQK.V	TCB3	3.918	879.739	-0.77	Lipid-binding protein, localized to the bud via specific mRNA transport; non-tagged protein detected in a phosphorylated state in mitochondria; GFP-fusion protein localizes to the cell periphery; C-termini of Tcb1p, Tcb2p and Tcb3p interact
YML076C	K.ATQTIIEGC@SKDDPR.L	WAR1	2.602	564.274	0.02	Homodimeric Zn2Cys6 zinc finger transcription factor; binds to a weak acid response element to induce transcription of PDR12 and FUN34, encoding an acid transporter and a putative ammonia transporter, respectively
YML078W	K.AGLLSMANAGPNTNGSQFFITTVPC@PWLDGK.H	CPR3	2.491	1094.2	-0.13	Mitochondrial peptidyl-prolyl cis-trans isomerase (cyclophilin), catalyzes the cis-trans isomerization of peptide bonds N-terminal to proline residues; involved in protein refolding after import into mitochondria
YML085C	K.I]GICYEPPTATPNSQLATVDR.A	TUB1	3.447	1152.07	-0.46	Alpha-tubulin; associates with beta-tubulin (Tub2p) to form tubulin dimer, which polymerizes to form microtubules
YML085C	K.IGIC@YEPPTATPNSQLATVDR.A	TUB1	3.091	1152.07	0.33	Alpha-tubulin; associates with beta-tubulin (Tub2p) to form tubulin dimer, which polymerizes to form microtubules
YML085C	K.IGICYE#PPTATPNSQLATVDR.A	TUB1	2.825	768.383	-0.27	Alpha-tubulin; associates with beta-tubulin (Tub2p) to form tubulin dimer, which polymerizes to form microtubules
YML085C	K.TVQLVDWC@PTGFK.I	TUB1	3.362	775.887	0.31	Alpha-tubulin; associates with beta-tubulin (Tub2p) to form tubulin dimer, which polymerizes to form microtubules
YML085C	K.YMATC@LLYR.G	TUB1	2.802	603.786	-0.08	Alpha-tubulin; associates with beta-tubulin (Tub2p) to form tubulin dimer, which polymerizes to form microtubules
YML086C	K.RTNTSPGPVYGNVCRPFLD#NTPSH#CR.F	ALO1	4.264	751.359	1.23	D-Arabinono-1,4-lactone oxidase, catalyzes the final step in biosynthesis of D-erythroascorbic acid, which is protective against oxidative stress
[truncated: 616 more rows]

## Sheet: Expt. 2
Table S3(B). Peptides containing cysteine identified from the second experiment with the enrichment and reduction/alkylation
[truncated: 2,205 more rows]

[truncated: 2 more sheets: Expt. 3, Overall]
